# Supplementary material for: Nonsphericity in diferratetracarbaboranes having 2n + 2 Wadean skeletal electrons: deviations from closo deltahedral geometries and high-energy kinetically stable isomers
Source: Royal Society of Chemistry journal article supplement (doi:10.1039/c9cp04777h), 2020-01-01
Supplement: c9cp04777h2.pdf [file c9cp04777h2.pdf]

## Nonsphericity in Diferratetracarboranes Having $2n + 2$ Wadean Skeletal Electrons: Deviations from closo Deltahedral Geometries and High- Energy Kinetically Stable Isomers

Amr A. A. Attia,<sup>1</sup> Alexandru Lupan,<sup>\*1</sup> and R. Bruce King<sup>\*2</sup>

<sup>1</sup>*Faculty of Chemistry and Chemical Engineering, Babeş-Bolyai University, Cluj-Napoca, Romania*

<sup>2</sup>*Department of Chemistry, University of Georgia, Athens, Georgia, 30602, USA*

### Supporting Information

Complete Gaussian09 Reference.

Tables S1A-S1B: Distance matrices and energy rankings for the  $Cp_2Fe_2C_4B_4H_8$  structures.

Tables S2A-S2B: Distance matrices and energy rankings for the  $Cp_2Fe_2C_4B_5H_9$  structures.

Tables S3A-S3B: Distance matrices and energy rankings for the  $Cp_2Fe_2C_4B_6H_{10}$  structures.

Tables S4A-S4B: Distance matrices and energy rankings for the  $Cp_2Fe_2C_4B_7H_{11}$  structures.

Tables S5A-S5B: Distance matrices and energy rankings for the  $Cp_2Fe_2C_4B_8H_{12}$  structures.

Table S6: Distance matrices for the  $Cp_2Fe_2(C(CH)_3)_4B_8H_{12}$  structures.

Table S7: Orbital energies and HOMO-LUMO gaps for the lowest energy structures.

Table S8: Relative energies for the lowest lying structures including the triplet spin state.

Complete Gaussian09 Reference.

Gaussian 09, Revision E.01, M. J. Frisch, G. W. Trucks, H. B. Schlegel, G. E. Scuseria, M. A. Robb, J. R. Cheeseman, G. Scalmani, V. Barone, B. Mennucci, G. A. Petersson, H. Nakatsuji, M. Caricato, X. Li, H. P. Hratchian, A. F. Izmaylov, J. Bloino, G. Zheng, J. L. Sonnenberg, M. Hada, M. Ehara, K. Toyota, R. Fukuda, J. Hasegawa, M. Ishida, T. Nakajima, Y. Honda, O. Kitao, H. Nakai, T. Vreven, J. A. Montgomery, Jr., J. E. Peralta, F. Ogliaro, M. Bearpark, J. J. Heyd, E. Brothers, K. N. Kudin, V. N. Staroverov, R. Kobayashi, J. Normand, K. Raghavachari, A. Rendell, J. C. Burant, S. S. Iyengar, J. Tomasi, M. Cossi, N. Rega, J. M. Millam, M. Klene, J. E. Knox, J. B. Cross, V. Bakken, C. Adamo, J. Jaramillo, R. Gomperts, R. E. Stratmann, O. Yazyev, A. J. Austin, R. Cammi, C. Pomelli, J. W. Ochterski, R. L. Martin, K. Morokuma, V. G. Zakrzewski, G. A. Voth, P. Salvador, J. J. Dannenberg, S. Dapprich, A. D. Daniels, O. Farkas, J. B. Foresman, J. V. Ortiz, J. Cioslowski, and D. J. Fox, Gaussian, Inc., Wallingford CT, 2009.

Table S1A: Distance table for the lowest-lying  $\text{Cp}_2\text{Fe}_2\text{C}_4\text{B}_4\text{H}_8$  optimized structures obtained at the PBE0/def2-TZVP level of theory. Included are the zero-point corrected absolute energies in (a.u.), relative energies in (kcal/mol), symmetry and wiberg bond indecies. The cyclopentadienyl ligands and hydrogens are omitted for clarity.

|                                                                                                                                                           |          |          |          |          |          |          |  |
|-----------------------------------------------------------------------------------------------------------------------------------------------------------|----------|----------|----------|----------|----------|----------|--|
| 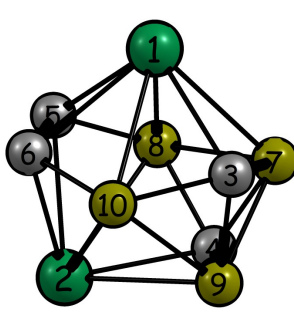 <p>1. -3169.978639 0.0 <math>C_1</math></p> <p>WBI: Fe1-Fe2: 0.1130</p> |          | 1        | 2        | 3        | 4        | 5        |  |
|                                                                                                                                                           | 1 Fe     | 0.000000 |          |          |          |          |  |
|                                                                                                                                                           | 2 Fe     | 3.364895 | 0.000000 |          |          |          |  |
|                                                                                                                                                           | 3 C      | 2.002366 | 3.138566 | 0.000000 |          |          |  |
|                                                                                                                                                           | 4 C      | 3.135312 | 2.002746 | 2.533440 | 0.000000 |          |  |
|                                                                                                                                                           | 5 C      | 2.035261 | 2.083911 | 3.127310 | 2.694206 | 0.000000 |  |
|                                                                                                                                                           | 6 C      | 2.084134 | 2.036482 | 2.695425 | 3.126661 | 1.417733 |  |
|                                                                                                                                                           | 7 B      | 2.233219 | 3.110235 | 1.557076 | 1.632714 | 2.949567 |  |
|                                                                                                                                                           | 8 B      | 2.378717 | 2.245820 | 2.917991 | 1.574495 | 1.559044 |  |
|                                                                                                                                                           | 9 B      | 3.108150 | 2.234944 | 1.632718 | 1.557455 | 3.230823 |  |
|                                                                                                                                                           | 10 B     | 2.246090 | 2.380422 | 1.575229 | 2.916656 | 2.607155 |  |
|                                                                                                                                                           |          | 6        | 7        | 8        | 9        | 10       |  |
|                                                                                                                                                           | 6 C      | 0.000000 |          |          |          |          |  |
|                                                                                                                                                           | 7 B      | 3.231627 | 0.000000 |          |          |          |  |
|                                                                                                                                                           | 8 B      | 2.607458 | 1.994521 | 0.000000 |          |          |  |
| 9 B                                                                                                                                                       | 2.948948 | 1.818156 | 2.709940 | 0.000000 |          |          |  |
| 10 B                                                                                                                                                      | 1.559331 | 2.709627 | 3.096020 | 1.992783 | 0.000000 |          |  |

|                                                                                                                                                               |          |          |          |          |          |          |  |
|---------------------------------------------------------------------------------------------------------------------------------------------------------------|----------|----------|----------|----------|----------|----------|--|
| 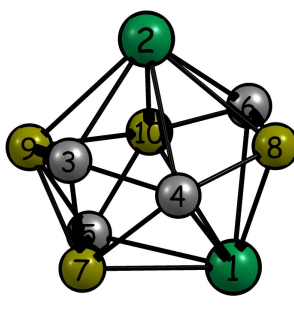 <p>2. -3169.952081 +16.7 <math>C_1</math></p> <p>WBI: Fe1-Fe2: 0.1190</p> |          | 1        | 2        | 3        | 4        | 5        |  |
|                                                                                                                                                               | 1 Fe     | 0.000000 |          |          |          |          |  |
|                                                                                                                                                               | 2 Fe     | 3.388812 | 0.000000 |          |          |          |  |
|                                                                                                                                                               | 3 C      | 3.133313 | 1.968391 | 0.000000 |          |          |  |
|                                                                                                                                                               | 4 C      | 2.309093 | 2.208604 | 1.490054 | 0.000000 |          |  |
|                                                                                                                                                               | 5 C      | 1.993514 | 3.144894 | 2.545832 | 2.800507 | 0.000000 |  |
|                                                                                                                                                               | 6 C      | 2.106691 | 2.054091 | 3.110861 | 2.555067 | 2.695546 |  |
|                                                                                                                                                               | 7 B      | 2.190594 | 3.098058 | 1.650576 | 1.859700 | 1.562884 |  |
|                                                                                                                                                               | 8 B      | 2.101177 | 2.173303 | 2.735141 | 1.577844 | 3.221767 |  |
|                                                                                                                                                               | 9 B      | 3.092873 | 2.227694 | 1.560810 | 2.591297 | 1.624093 |  |
|                                                                                                                                                               | 10 B     | 2.248413 | 2.410894 | 2.934149 | 3.008616 | 1.583311 |  |
|                                                                                                                                                               |          | 6        | 7        | 8        | 9        | 10       |  |
|                                                                                                                                                               | 6 C      | 0.000000 |          |          |          |          |  |
|                                                                                                                                                               | 7 B      | 3.209275 | 0.000000 |          |          |          |  |
|                                                                                                                                                               | 8 B      | 1.512128 | 2.979746 | 0.000000 |          |          |  |
| 9 B                                                                                                                                                           | 2.938897 | 1.822622 | 3.316941 | 0.000000 |          |          |  |
| 10 B                                                                                                                                                          | 1.553050 | 2.716512 | 2.719429 | 2.009990 | 0.000000 |          |  |

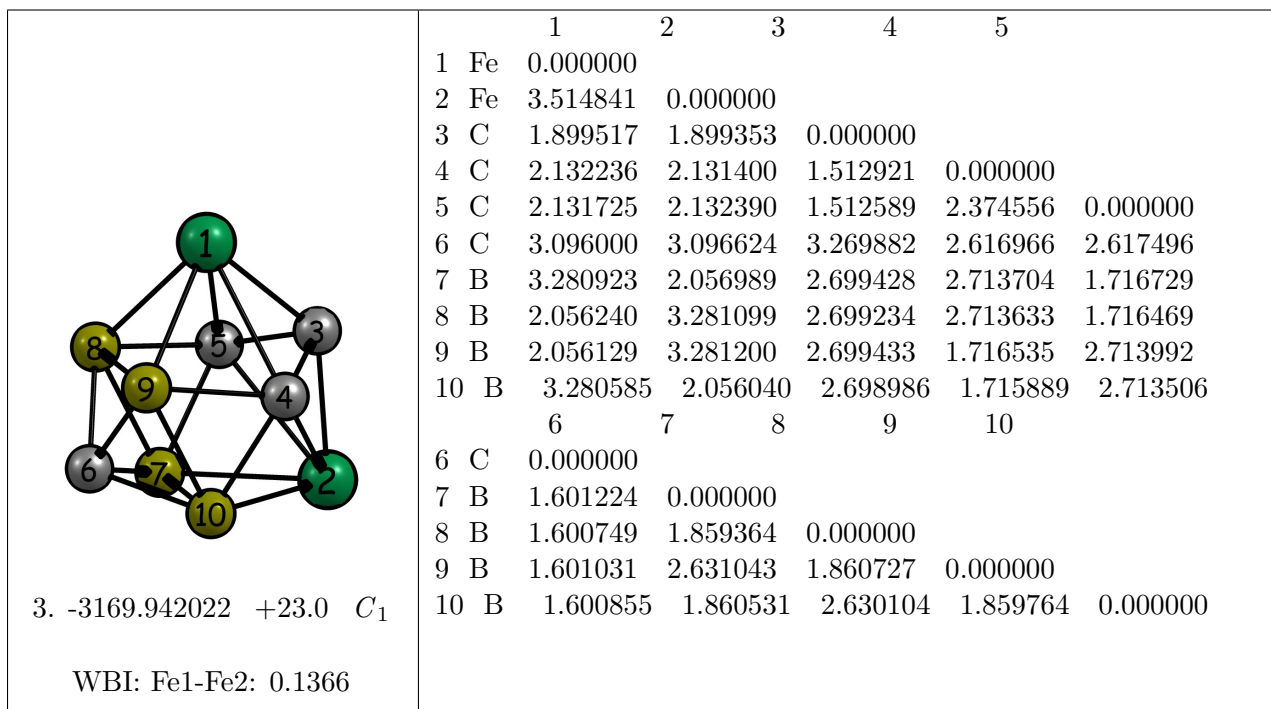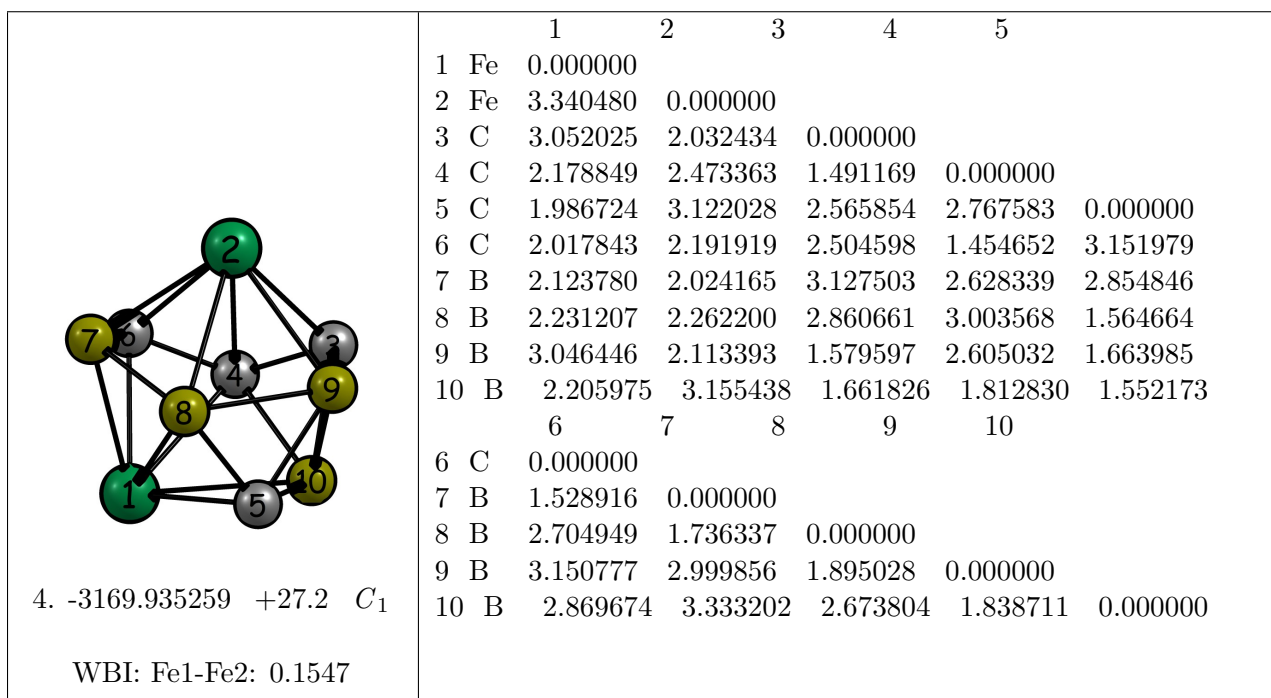

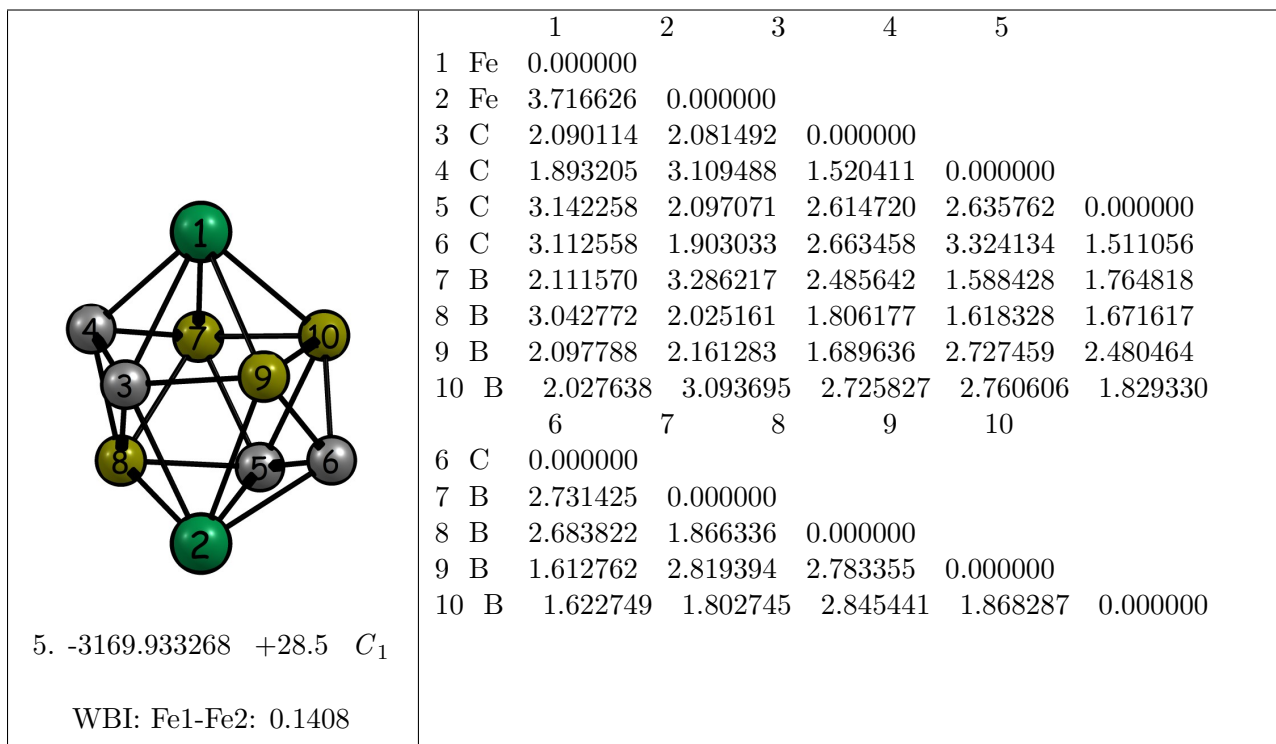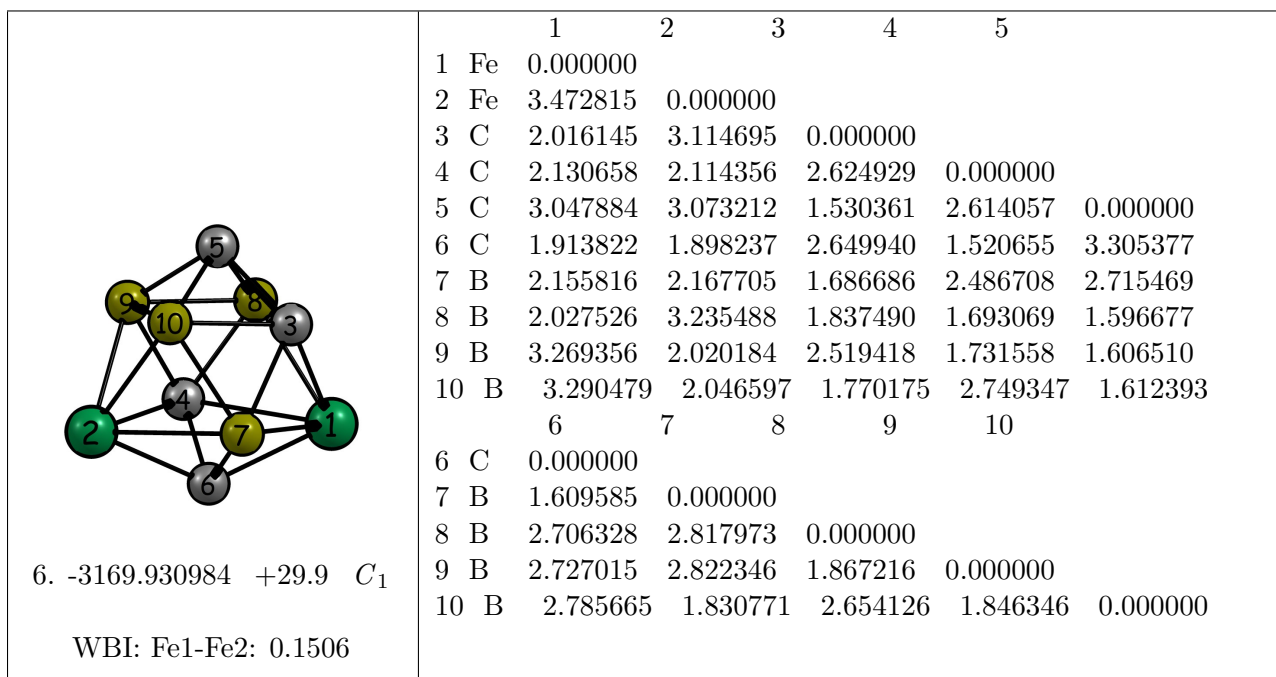

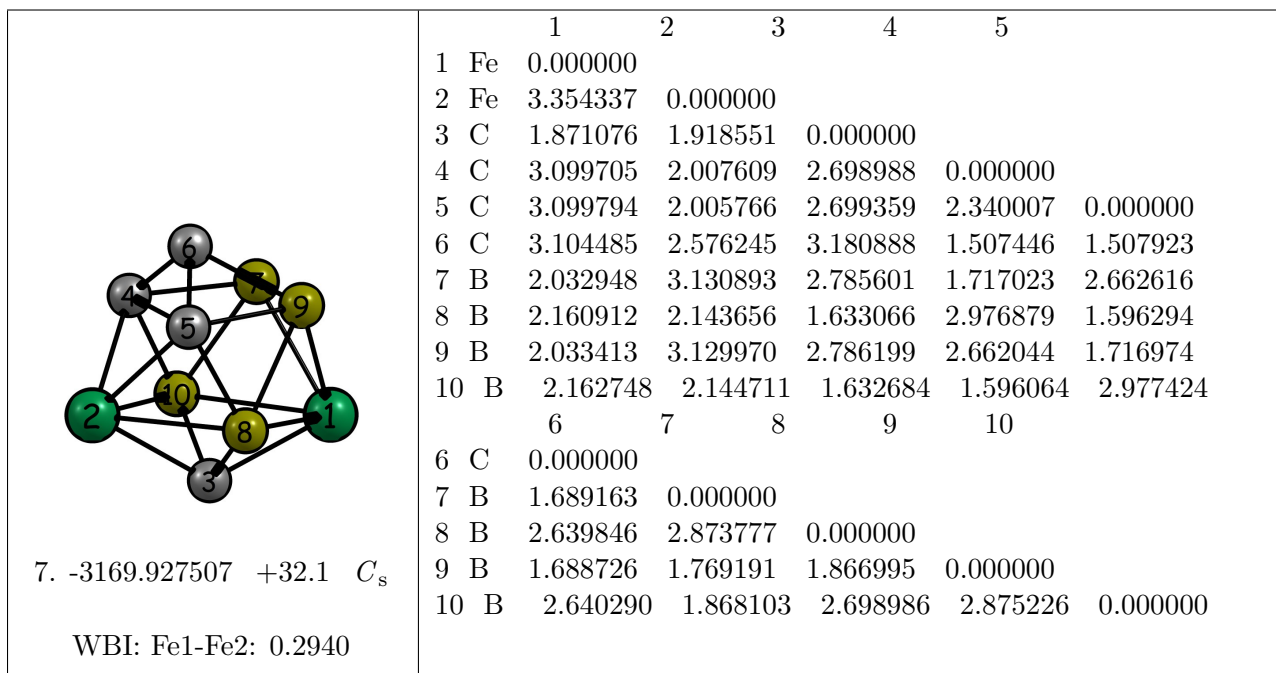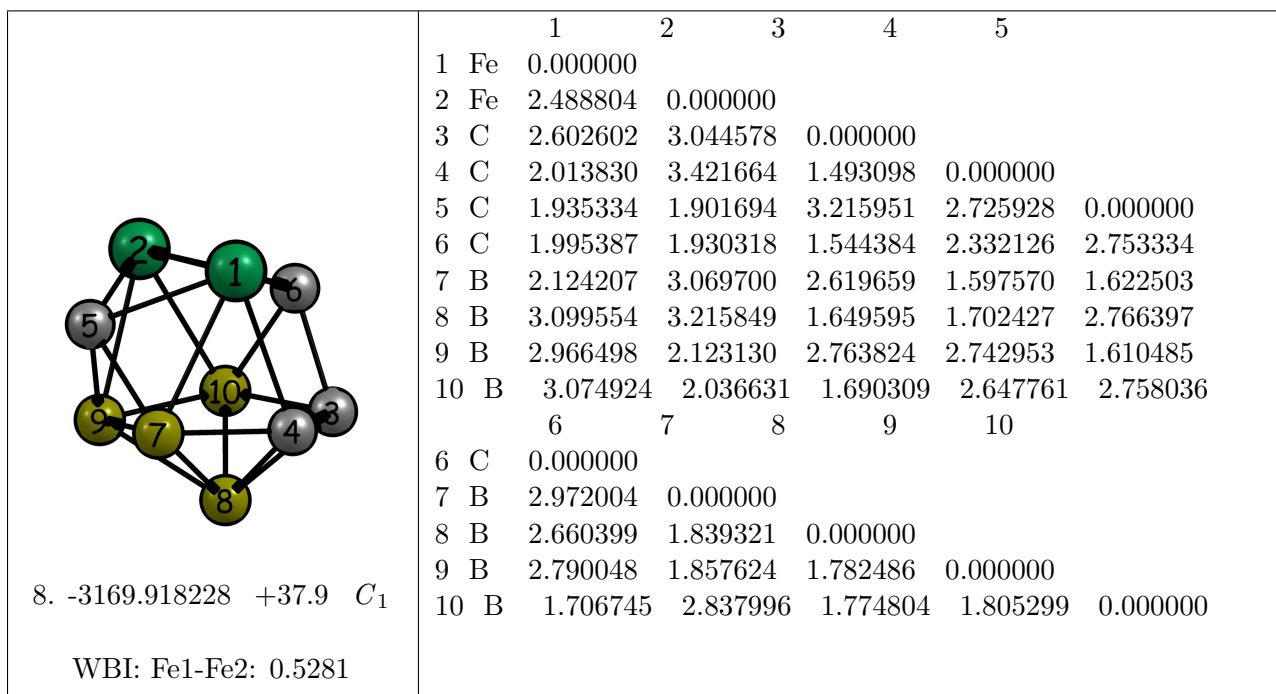

Table S1B: Energy ranking for the Distance table for the lowest-lying  $\text{Cp}_2\text{Fe}_2\text{C}_4\text{B}_4\text{H}_8$  optimized structures at the B3LYP/6-31G(d) level of theory.

| No. | Initial structure              | Final Energy (a.u.) | Relative Energy (kcal/mol) |
|-----|--------------------------------|---------------------|----------------------------|
| 1   | 10v-09-Bisdisph—fe2c4—1729     | -3170.655712        | 0.0                        |
| 2   | 10v-09-Bisdisph—fe2c4—1757     | -3170.655712        | 0.0                        |
| 3   | 10v-09-Bisdisph—fe2c4—1789     | -3170.655712        | 0.0                        |
| 4   | 10v-09-Bisdisph—fe2c4—1736     | -3170.655633        | 0.0                        |
| 5   | 10v-07-Isocloso—fe2c4—1051     | -3170.655603        | 0.1                        |
| 6   | 10v-07-Isocloso—fe2c4—1093     | -3170.655574        | 0.1                        |
| 7   | 10v-07-Isocloso—fe2c4—1138     | -3170.655469        | 0.2                        |
| 8   | 10v-07-Isocloso—fe2c4—1153     | -3170.655437        | 0.2                        |
| 9   | 10v-05-PentagPrism—fe2c4—592   | -3170.655393        | 0.2                        |
| 10  | 10v-05-PentagPrism—fe2c4—646   | -3170.655393        | 0.2                        |
| 11  | 10v-09-Bisdisph—fe2c4—1730     | -3170.655383        | 0.2                        |
| 12  | 10v-07-Isocloso—fe2c4—1148     | -3170.655379        | 0.2                        |
| 13  | 10v-07-Isocloso—fe2c4—1164     | -3170.655257        | 0.3                        |
| 14  | 10v-09-Bisdisph—fe2c4—1900     | -3170.655148        | 0.4                        |
| 15  | 10v-09-Bisdisph—fe2c4—1973     | -3170.655091        | 0.4                        |
| 16  | 10v-09-Bisdisph—fe2c4—1923     | -3170.654886        | 0.5                        |
| 17  | 10v-09-Bisdisph—fe2c4—1947     | -3170.654886        | 0.5                        |
| 18  | 10v-07-Isocloso—fe2c4—1180     | -3170.63081         | 15.6                       |
| 19  | 10v-01-trcTriPri1—fe2c4—82     | -3170.630807        | 15.6                       |
| 20  | 10v-06-AntiPr—fe2c4—736        | -3170.630798        | 15.6                       |
| 21  | 10v-01-trcTriPri1—fe2c4—62     | -3170.63074         | 15.7                       |
| 22  | 10v-02-trcTriPri2—fe2c4—208    | -3170.630736        | 15.7                       |
| 23  | 10v-02-trcTriPri2—fe2c4—226    | -3170.630736        | 15.7                       |
| 24  | 10v-02-trcTriPri2—fe2c4—276    | -3170.630734        | 15.7                       |
| 25  | 10v-07-Isocloso—fe2c4—1111     | -3170.630703        | 15.7                       |
| 26  | 10v-09-Bisdisph—fe2c4—1824     | -3170.630672        | 15.7                       |
| 27  | 10v-09-Bisdisph—fe2c4—1806     | -3170.630665        | 15.7                       |
| 28  | 10v-09-Bisdisph—fe2c4—1812     | -3170.630665        | 15.7                       |
| 29  | 10v-09-Bisdisph—fe2c4—1818     | -3170.630628        | 15.7                       |
| 30  | 10v-06-AntiPr—fe2c4—759        | -3170.630592        | 15.8                       |
| 31  | 10v-09-Bisdisph—fe2c4—1758     | -3170.630587        | 15.8                       |
| 32  | 10v-09-Bisdisph—fe2c4—1790     | -3170.630582        | 15.8                       |
| 33  | 10v-09-Bisdisph—fe2c4—1933     | -3170.630581        | 15.8                       |
| 34  | 10v-09-Bisdisph—fe2c4—1755     | -3170.630568        | 15.8                       |
| 35  | 10v-07-Isocloso—fe2c4—1189     | -3170.63055         | 15.8                       |
| 36  | 10v-07-Isocloso—fe2c4—1197     | -3170.63055         | 15.8                       |
| 37  | 10v-05-PentagPrism—fe2c4—616   | -3170.630545        | 15.8                       |
| 38  | 10v-05-PentagPrism—fe2c4—591   | -3170.630322        | 15.9                       |
| 39  | 10v-05-PentagPrism—fe2c4—645   | -3170.630322        | 15.9                       |
| 40  | 10v-04-BicapSqAntipr—fe2c4—446 | -3170.62946         | 16.5                       |
| 41  | 10v-09-Bisdisph—fe2c4—1935     | -3170.629077        | 16.7                       |
| 42  | 10v-09-Bisdisph—fe2c4—1979     | -3170.629077        | 16.7                       |
| 43  | 10v-09-Bisdisph—fe2c4—1917     | -3170.629073        | 16.7                       |
| 44  | 10v-09-Bisdisph—fe2c4—1941     | -3170.629073        | 16.7                       |
| 45  | 10v-02-trcTriPri2—fe2c4—219    | -3170.6236          | 20.2                       |
| 46  | 10v-02-trcTriPri2—fe2c4—269    | -3170.623581        | 20.2                       |
| 47  | 10v-02-trcTriPri2—fe2c4—229    | -3170.623567        | 20.2                       |

|    |                                 |              |      |
|----|---------------------------------|--------------|------|
| 48 | 10v-02-trcTriPri2—fe2c4—243     | -3170.623547 | 20.2 |
| 49 | 10v-09-Bisdisph—fe2c4—1781      | -3170.623529 | 20.2 |
| 50 | 10v-07-Isocloso—fe2c4—1056      | -3170.623495 | 20.2 |
| 51 | 10v-09-Bisdisph—fe2c4—1727      | -3170.623478 | 20.2 |
| 52 | 10v-08-BicapSqAntipr—fe2c4—1379 | -3170.623437 | 20.3 |
| 53 | 10v-08-BicapSqAntipr—fe2c4—1351 | -3170.623435 | 20.3 |
| 54 | 10v-08-BicapSqAntipr—fe2c4—1363 | -3170.623434 | 20.3 |
| 55 | 10v-02-trcTriPri2—fe2c4—242     | -3170.62157  | 21.4 |
| 56 | 10v-01-trcTriPri1—fe2c4—31      | -3170.621559 | 21.4 |
| 57 | 10v-01-trcTriPri1—fe2c4—24      | -3170.621464 | 21.5 |
| 58 | 10v-01-trcTriPri1—fe2c4—18      | -3170.621461 | 21.5 |
| 59 | 10v-01-trcTriPri1—fe2c4—12      | -3170.62146  | 21.5 |
| 60 | 10v-08-BicapSqAntipr—fe2c4—1347 | -3170.621447 | 21.5 |
| 61 | 10v-08-BicapSqAntipr—fe2c4—1350 | -3170.621416 | 21.5 |
| 62 | 10v-08-BicapSqAntipr—fe2c4—1397 | -3170.621416 | 21.5 |
| 63 | 10v-02-trcTriPri2—fe2c4—283     | -3170.6214   | 21.5 |
| 64 | 10v-09-Bisdisph—fe2c4—1749      | -3170.621168 | 21.7 |
| 65 | 10v-07-Isocloso—fe2c4—982       | -3170.619927 | 22.5 |
| 66 | 10v-07-Isocloso—fe2c4—986       | -3170.619927 | 22.5 |
| 67 | 10v-08-BicapSqAntipr—fe2c4—1257 | -3170.619892 | 22.5 |
| 68 | 10v-07-Isocloso—fe2c4—945       | -3170.619878 | 22.5 |
| 69 | 10v-09-Bisdisph—fe2c4—1995      | -3170.619851 | 22.5 |
| 70 | 10v-07-Isocloso—fe2c4—963       | -3170.619849 | 22.5 |
| 71 | 10v-08-BicapSqAntipr—fe2c4—1232 | -3170.619825 | 22.5 |
| 72 | 10v-07-Isocloso—fe2c4—924       | -3170.619794 | 22.5 |
| 73 | 10v-07-Isocloso—fe2c4—877       | -3170.619778 | 22.5 |
| 74 | 10v-07-Isocloso—fe2c4—1030      | -3170.61977  | 22.6 |
| 75 | 10v-07-Isocloso—fe2c4—1036      | -3170.61977  | 22.6 |
| 76 | 10v-07-Isocloso—fe2c4—887       | -3170.61977  | 22.6 |
| 77 | 10v-06-AntiPr—fe2c4—670         | -3170.619761 | 22.6 |
| 78 | 10v-01-trcTriPri1—fe2c4—38      | -3170.619718 | 22.6 |
| 79 | 10v-01-trcTriPri1—fe2c4—55      | -3170.619718 | 22.6 |
| 80 | 10v-04-BicapSqAntipr—fe2c4—408  | -3170.619717 | 22.6 |
| 81 | 10v-09-Bisdisph—fe2c4—1970      | -3170.619676 | 22.6 |
| 82 | 10v-01-trcTriPri1—fe2c4—39      | -3170.619669 | 22.6 |
| 83 | 10v-01-trcTriPri1—fe2c4—65      | -3170.619661 | 22.6 |
| 84 | 10v-08-BicapSqAntipr—fe2c4—1251 | -3170.619659 | 22.6 |
| 85 | 10v-08-BicapSqAntipr—fe2c4—1313 | -3170.619657 | 22.6 |
| 86 | 10v-06-AntiPr—fe2c4—745         | -3170.619641 | 22.6 |
| 87 | 10v-08-BicapSqAntipr—fe2c4—1237 | -3170.619633 | 22.6 |
| 88 | 10v-08-BicapSqAntipr—fe2c4—1337 | -3170.619632 | 22.6 |
| 89 | 10v-09-Bisdisph—fe2c4—2001      | -3170.619541 | 22.7 |
| 90 | 10v-02-trcTriPri2—fe2c4—304     | -3170.618741 | 23.2 |
| 91 | 10v-01-trcTriPri1—fe2c4—54      | -3170.618712 | 23.2 |
| 92 | 10v-01-trcTriPri1—fe2c4—81      | -3170.618683 | 23.2 |
| 93 | 10v-02-trcTriPri2—fe2c4—306     | -3170.618598 | 23.3 |
| 94 | 10v-09-Bisdisph—fe2c4—1796      | -3170.618593 | 23.3 |
| 95 | 10v-07-Isocloso—fe2c4—1203      | -3170.618572 | 23.3 |
| 96 | 10v-07-Isocloso—fe2c4—1181      | -3170.618546 | 23.3 |
| 97 | 10v-01-trcTriPri1—fe2c4—56      | -3170.618465 | 23.4 |
| 98 | 10v-09-Bisdisph—fe2c4—1922      | -3170.617636 | 23.9 |



|     |                      |       |      |              |      |
|-----|----------------------|-------|------|--------------|------|
| 99  | 10v-07-Isocloso      | fe2c4 | 1126 | -3170.61758  | 23.9 |
| 100 | 10v-07-Isocloso      | fe2c4 | 1149 | -3170.61756  | 23.9 |
| 101 | 10v-09-Bisdisph      | fe2c4 | 1904 | -3170.61751  | 24.0 |
| 102 | 10v-09-Bisdisph      | fe2c4 | 1964 | -3170.617502 | 24.0 |
| 103 | 10v-02-trcTriPri2    | fe2c4 | 199  | -3170.617438 | 24.0 |
| 104 | 10v-02-trcTriPri2    | fe2c4 | 221  | -3170.617438 | 24.0 |
| 105 | 10v-02-trcTriPri2    | fe2c4 | 245  | -3170.617438 | 24.0 |
| 106 | 10v-02-trcTriPri2    | fe2c4 | 211  | -3170.617422 | 24.0 |
| 107 | 10v-02-trcTriPri2    | fe2c4 | 200  | -3170.617421 | 24.0 |
| 108 | 10v-02-trcTriPri2    | fe2c4 | 235  | -3170.617421 | 24.0 |
| 109 | 10v-02-trcTriPri2    | fe2c4 | 281  | -3170.617421 | 24.0 |
| 110 | 10v-02-trcTriPri2    | fe2c4 | 265  | -3170.617406 | 24.0 |
| 111 | 10v-08-BicapSqAntipr | fe2c4 | 1345 | -3170.61736  | 24.1 |
| 112 | 10v-02-trcTriPri2    | fe2c4 | 271  | -3170.617278 | 24.1 |
| 113 | 10v-08-BicapSqAntipr | fe2c4 | 1353 | -3170.617263 | 24.1 |
| 114 | 10v-08-BicapSqAntipr | fe2c4 | 1391 | -3170.617262 | 24.1 |
| 115 | 10v-08-BicapSqAntipr | fe2c4 | 1365 | -3170.617259 | 24.1 |
| 116 | 10v-07-Isocloso      | fe2c4 | 1062 | -3170.617247 | 24.1 |
| 117 | 10v-07-Isocloso      | fe2c4 | 1140 | -3170.617238 | 24.1 |
| 118 | 10v-07-Isocloso      | fe2c4 | 1058 | -3170.617227 | 24.2 |
| 119 | 10v-07-Isocloso      | fe2c4 | 1068 | -3170.617225 | 24.2 |
| 120 | 10v-07-Isocloso      | fe2c4 | 1064 | -3170.617207 | 24.2 |
| 121 | 10v-07-Isocloso      | fe2c4 | 970  | -3170.617206 | 24.2 |
| 122 | 10v-07-Isocloso      | fe2c4 | 975  | -3170.617205 | 24.2 |
| 123 | 10v-08-BicapSqAntipr | fe2c4 | 1346 | -3170.617163 | 24.2 |
| 124 | 10v-08-BicapSqAntipr | fe2c4 | 1357 | -3170.617162 | 24.2 |
| 125 | 10v-08-BicapSqAntipr | fe2c4 | 1369 | -3170.617161 | 24.2 |
| 126 | 10v-03-BicapCubD4h   | fe2c4 | 401  | -3170.617119 | 24.2 |
| 127 | 10v-09-Bisdisph      | fe2c4 | 1990 | -3170.61711  | 24.2 |
| 128 | 10v-09-Bisdisph      | fe2c4 | 1982 | -3170.61709  | 24.2 |
| 129 | 10v-08-BicapSqAntipr | fe2c4 | 1267 | -3170.617075 | 24.2 |
| 130 | 10v-03-BicapCubD4h   | fe2c4 | 373  | -3170.617074 | 24.2 |
| 131 | 10v-07-Isocloso      | fe2c4 | 972  | -3170.617069 | 24.2 |
| 132 | 10v-07-Isocloso      | fe2c4 | 1007 | -3170.617065 | 24.3 |
| 133 | 10v-01-trcTriPri1    | fe2c4 | 41   | -3170.617043 | 24.3 |
| 134 | 10v-01-trcTriPri1    | fe2c4 | 59   | -3170.617043 | 24.3 |
| 135 | 10v-06-AntiPr        | fe2c4 | 690  | -3170.617038 | 24.3 |
| 136 | 10v-06-AntiPr        | fe2c4 | 721  | -3170.61703  | 24.3 |
| 137 | 10v-03-BicapCubD4h   | fe2c4 | 390  | -3170.616987 | 24.3 |
| 138 | 10v-08-BicapSqAntipr | fe2c4 | 1261 | -3170.616971 | 24.3 |
| 139 | 10v-09-Bisdisph      | fe2c4 | 1828 | -3170.616954 | 24.3 |
| 140 | 10v-09-Bisdisph      | fe2c4 | 1851 | -3170.616954 | 24.3 |
| 141 | 10v-09-Bisdisph      | fe2c4 | 1869 | -3170.616954 | 24.3 |
| 142 | 10v-01-trcTriPri1    | fe2c4 | 102  | -3170.61695  | 24.3 |
| 143 | 10v-01-trcTriPri1    | fe2c4 | 42   | -3170.616908 | 24.4 |
| 144 | 10v-09-Bisdisph      | fe2c4 | 1840 | -3170.616904 | 24.4 |
| 145 | 10v-09-Bisdisph      | fe2c4 | 1864 | -3170.616898 | 24.4 |
| 146 | 10v-06-AntiPr        | fe2c4 | 763  | -3170.616875 | 24.4 |
| 147 | 10v-06-AntiPr        | fe2c4 | 751  | -3170.616862 | 24.4 |
| 148 | 10v-06-AntiPr        | fe2c4 | 710  | -3170.616755 | 24.4 |
| 149 | 10v-08-BicapSqAntipr | fe2c4 | 1277 | -3170.616647 | 24.5 |

|     |                                 |              |      |
|-----|---------------------------------|--------------|------|
| 150 | 10v-08-BicapSqAntipr—fe2c4—1253 | -3170.616637 | 24.5 |
| 151 | 10v-07-Isocloso—fe2c4—940       | -3170.616496 | 24.6 |
| 152 | 10v-09-Bisdisph—fe2c4—1821      | -3170.616399 | 24.7 |
| 153 | 10v-07-Isocloso—fe2c4—1207      | -3170.616363 | 24.7 |
| 154 | 10v-07-Isocloso—fe2c4—1161      | -3170.61626  | 24.8 |
| 155 | 10v-07-Isocloso—fe2c4—1165      | -3170.6162   | 24.8 |
| 156 | 10v-07-Isocloso—fe2c4—1171      | -3170.6162   | 24.8 |
| 157 | 10v-07-Isocloso—fe2c4—1135      | -3170.616188 | 24.8 |
| 158 | 10v-07-Isocloso—fe2c4—1159      | -3170.616188 | 24.8 |
| 159 | 10v-08-BicapSqAntipr—fe2c4—1362 | -3170.616186 | 24.8 |
| 160 | 10v-07-Isocloso—fe2c4—1137      | -3170.616177 | 24.8 |
| 161 | 10v-09-Bisdisph—fe2c4—1797      | -3170.616176 | 24.8 |
| 162 | 10v-08-BicapSqAntipr—fe2c4—1407 | -3170.616    | 24.9 |
| 163 | 10v-08-BicapSqAntipr—fe2c4—1395 | -3170.615995 | 24.9 |
| 164 | 10v-07-Isocloso—fe2c4—1005      | -3170.615989 | 24.9 |
| 165 | 10v-01-trcTriPri1—fe2c4—15      | -3170.615952 | 25.0 |
| 166 | 10v-07-Isocloso—fe2c4—981       | -3170.615911 | 25.0 |
| 167 | 10v-07-Isocloso—fe2c4—985       | -3170.615911 | 25.0 |
| 168 | 10v-07-Isocloso—fe2c4—1013      | -3170.61591  | 25.0 |
| 169 | 10v-07-Isocloso—fe2c4—997       | -3170.61591  | 25.0 |
| 170 | 10v-03-BicapCubD4h—fe2c4—399    | -3170.615892 | 25.0 |
| 171 | 10v-07-Isocloso—fe2c4—949       | -3170.615888 | 25.0 |
| 172 | 10v-07-Isocloso—fe2c4—906       | -3170.615887 | 25.0 |
| 173 | 10v-04-BicapSqAntipr—fe2c4—423  | -3170.615881 | 25.0 |
| 174 | 10v-09-Bisdisph—fe2c4—1834      | -3170.615872 | 25.0 |
| 175 | 10v-09-Bisdisph—fe2c4—1842      | -3170.615872 | 25.0 |
| 176 | 10v-09-Bisdisph—fe2c4—1870      | -3170.615872 | 25.0 |
| 177 | 10v-03-BicapCubD4h—fe2c4—374    | -3170.615852 | 25.0 |
| 178 | 10v-07-Isocloso—fe2c4—1191      | -3170.61585  | 25.0 |
| 179 | 10v-07-Isocloso—fe2c4—1006      | -3170.615813 | 25.0 |
| 180 | 10v-03-BicapCubD4h—fe2c4—384    | -3170.61581  | 25.0 |
| 181 | 10v-03-BicapCubD4h—fe2c4—394    | -3170.615809 | 25.0 |
| 182 | 10v-09-Bisdisph—fe2c4—1876      | -3170.615798 | 25.0 |
| 183 | 10v-09-Bisdisph—fe2c4—1888      | -3170.615798 | 25.0 |
| 184 | 10v-09-Bisdisph—fe2c4—1863      | -3170.615773 | 25.1 |
| 185 | 10v-06-AntiPr—fe2c4—696         | -3170.615762 | 25.1 |
| 186 | 10v-09-Bisdisph—fe2c4—1839      | -3170.615761 | 25.1 |
| 187 | 10v-09-Bisdisph—fe2c4—1857      | -3170.615761 | 25.1 |
| 188 | 10v-06-AntiPr—fe2c4—716         | -3170.615756 | 25.1 |
| 189 | 10v-06-AntiPr—fe2c4—684         | -3170.61575  | 25.1 |
| 190 | 10v-06-AntiPr—fe2c4—722         | -3170.615743 | 25.1 |
| 191 | 10v-03-BicapCubD4h—fe2c4—385    | -3170.615735 | 25.1 |
| 192 | 10v-08-BicapSqAntipr—fe2c4—1243 | -3170.615731 | 25.1 |
| 193 | 10v-08-BicapSqAntipr—fe2c4—1231 | -3170.615729 | 25.1 |
| 194 | 10v-07-Isocloso—fe2c4—896       | -3170.615723 | 25.1 |
| 195 | 10v-08-BicapSqAntipr—fe2c4—1265 | -3170.615721 | 25.1 |
| 196 | 10v-08-BicapSqAntipr—fe2c4—1301 | -3170.615721 | 25.1 |
| 197 | 10v-07-Isocloso—fe2c4—892       | -3170.615711 | 25.1 |
| 198 | 10v-07-Isocloso—fe2c4—939       | -3170.615711 | 25.1 |
| 199 | 10v-03-BicapCubD4h—fe2c4—397    | -3170.615684 | 25.1 |
| 200 | 10v-06-AntiPr—fe2c4—701         | -3170.615678 | 25.1 |

|     |                                 |              |      |
|-----|---------------------------------|--------------|------|
| 201 | 10v-06-AntiPr—fe2c4—681         | -3170.615674 | 25.1 |
| 202 | 10v-06-AntiPr—fe2c4—680         | -3170.61567  | 25.1 |
| 203 | 10v-06-AntiPr—fe2c4—674         | -3170.615669 | 25.1 |
| 204 | 10v-06-AntiPr—fe2c4—666         | -3170.615667 | 25.1 |
| 205 | 10v-06-AntiPr—fe2c4—687         | -3170.615656 | 25.1 |
| 206 | 10v-01-trcTriPri1—fe2c4—45      | -3170.61565  | 25.1 |
| 207 | 10v-01-trcTriPri1—fe2c4—63      | -3170.61564  | 25.1 |
| 208 | 10v-01-trcTriPri1—fe2c4—95      | -3170.61564  | 25.1 |
| 209 | 10v-07-Isocloso—fe2c4—933       | -3170.615625 | 25.2 |
| 210 | 10v-07-Isocloso—fe2c4—897       | -3170.615618 | 25.2 |
| 211 | 10v-04-BicapSqAntipr—fe2c4—426  | -3170.615611 | 25.2 |
| 212 | 10v-07-Isocloso—fe2c4—879       | -3170.61561  | 25.2 |
| 213 | 10v-06-AntiPr—fe2c4—663         | -3170.615588 | 25.2 |
| 214 | 10v-08-BicapSqAntipr—fe2c4—1325 | -3170.615551 | 25.2 |
| 215 | 10v-08-BicapSqAntipr—fe2c4—1269 | -3170.615527 | 25.2 |
| 216 | 10v-07-Isocloso—fe2c4—1009      | -3170.615502 | 25.2 |
| 217 | 10v-04-BicapSqAntipr—fe2c4—417  | -3170.615429 | 25.3 |
| 218 | 10v-07-Isocloso—fe2c4—888       | -3170.61542  | 25.3 |
| 219 | 10v-07-Isocloso—fe2c4—902       | -3170.61542  | 25.3 |
| 220 | 10v-03-BicapCubD4h—fe2c4—386    | -3170.615398 | 25.3 |
| 221 | 10v-07-Isocloso—fe2c4—1026      | -3170.615367 | 25.3 |
| 222 | 10v-07-Isocloso—fe2c4—978       | -3170.615367 | 25.3 |
| 223 | 10v-07-Isocloso—fe2c4—990       | -3170.615367 | 25.3 |
| 224 | 10v-06-AntiPr—fe2c4—678         | -3170.615362 | 25.3 |
| 225 | 10v-06-AntiPr—fe2c4—673         | -3170.615333 | 25.3 |
| 226 | 10v-06-AntiPr—fe2c4—757         | -3170.615319 | 25.3 |
| 227 | 10v-06-AntiPr—fe2c4—734         | -3170.615314 | 25.4 |
| 228 | 10v-06-AntiPr—fe2c4—692         | -3170.615308 | 25.4 |
| 229 | 10v-03-BicapCubD4h—fe2c4—378    | -3170.615295 | 25.4 |
| 230 | 10v-07-Isocloso—fe2c4—923       | -3170.615259 | 25.4 |
| 231 | 10v-08-BicapSqAntipr—fe2c4—1236 | -3170.615253 | 25.4 |
| 232 | 10v-07-Isocloso—fe2c4—900       | -3170.615211 | 25.4 |
| 233 | 10v-06-AntiPr—fe2c4—669         | -3170.615205 | 25.4 |
| 234 | 10v-08-BicapSqAntipr—fe2c4—1360 | -3170.615086 | 25.5 |
| 235 | 10v-08-BicapSqAntipr—fe2c4—1401 | -3170.615077 | 25.5 |
| 236 | 10v-06-AntiPr—fe2c4—686         | -3170.615048 | 25.5 |
| 237 | 10v-08-BicapSqAntipr—fe2c4—1307 | -3170.615022 | 25.5 |
| 238 | 10v-08-BicapSqAntipr—fe2c4—1255 | -3170.614955 | 25.6 |
| 239 | 10v-07-Isocloso—fe2c4—790       | -3170.612022 | 27.4 |
| 240 | 10v-07-Isocloso—fe2c4—796       | -3170.611915 | 27.5 |
| 241 | 10v-02-trcTriPri2—fe2c4—187     | -3170.611897 | 27.5 |
| 242 | 10v-02-trcTriPri2—fe2c4—193     | -3170.611897 | 27.5 |
| 243 | 10v-02-trcTriPri2—fe2c4—188     | -3170.611883 | 27.5 |
| 244 | 10v-02-trcTriPri2—fe2c4—194     | -3170.61188  | 27.5 |
| 245 | 10v-03-BicapCubC2v—fe2c4—332    | -3170.611869 | 27.5 |
| 246 | 10v-03-BicapCubC2v—fe2c4—326    | -3170.611865 | 27.5 |
| 247 | 10v-07-Isocloso—fe2c4—821       | -3170.611807 | 27.6 |
| 248 | 10v-07-Isocloso—fe2c4—827       | -3170.611807 | 27.6 |
| 249 | 10v-07-Isocloso—fe2c4—833       | -3170.611807 | 27.6 |
| 250 | 10v-08-BicapSqAntipr—fe2c4—1623 | -3170.611647 | 27.7 |
| 251 | 10v-02-trcTriPri2—fe2c4—128     | -3170.611646 | 27.7 |

|     |                                 |              |      |
|-----|---------------------------------|--------------|------|
| 252 | 10v-02-trcTriPri2—fe2c4—140     | -3170.611646 | 27.7 |
| 253 | 10v-02-trcTriPri2—fe2c4—158     | -3170.611646 | 27.7 |
| 254 | 10v-02-trcTriPri2—fe2c4—164     | -3170.611646 | 27.7 |
| 255 | 10v-02-trcTriPri2—fe2c4—192     | -3170.611646 | 27.7 |
| 256 | 10v-08-BicapSqAntipr—fe2c4—1631 | -3170.611612 | 27.7 |
| 257 | 10v-07-Isocloso—fe2c4—857       | -3170.611599 | 27.7 |
| 258 | 10v-08-BicapSqAntipr—fe2c4—1641 | -3170.611553 | 27.7 |
| 259 | 10v-08-BicapSqAntipr—fe2c4—1673 | -3170.61155  | 27.7 |
| 260 | 10v-08-BicapSqAntipr—fe2c4—1677 | -3170.611545 | 27.7 |
| 261 | 10v-08-BicapSqAntipr—fe2c4—1697 | -3170.611543 | 27.7 |
| 262 | 10v-07-Isocloso—fe2c4—779       | -3170.611542 | 27.7 |
| 263 | 10v-07-Isocloso—fe2c4—791       | -3170.611542 | 27.7 |
| 264 | 10v-07-Isocloso—fe2c4—861       | -3170.611541 | 27.7 |
| 265 | 10v-07-Isocloso—fe2c4—855       | -3170.611539 | 27.7 |
| 266 | 10v-07-Isocloso—fe2c4—825       | -3170.611533 | 27.7 |
| 267 | 10v-07-Isocloso—fe2c4—797       | -3170.611528 | 27.7 |
| 268 | 10v-04-BicapSqAntipr—fe2c4—501  | -3170.611384 | 27.8 |
| 269 | 10v-08-BicapSqAntipr—fe2c4—1629 | -3170.611294 | 27.9 |
| 270 | 10v-08-BicapSqAntipr—fe2c4—1671 | -3170.610799 | 28.2 |
| 271 | 10v-08-BicapSqAntipr—fe2c4—1669 | -3170.610742 | 28.2 |
| 272 | 10v-07-Isocloso—fe2c4—856       | -3170.610719 | 28.2 |
| 273 | 10v-07-Isocloso—fe2c4—820       | -3170.610705 | 28.2 |
| 274 | 10v-08-BicapSqAntipr—fe2c4—1627 | -3170.610654 | 28.3 |
| 275 | 10v-07-Isocloso—fe2c4—794       | -3170.61063  | 28.3 |
| 276 | 10v-02-trcTriPri2—fe2c4—127     | -3170.610619 | 28.3 |
| 277 | 10v-02-trcTriPri2—fe2c4—139     | -3170.610619 | 28.3 |
| 278 | 10v-02-trcTriPri2—fe2c4—191     | -3170.610619 | 28.3 |
| 279 | 10v-07-Isocloso—fe2c4—798       | -3170.610605 | 28.3 |
| 280 | 10v-02-trcTriPri2—fe2c4—163     | -3170.610599 | 28.3 |
| 281 | 10v-02-trcTriPri2—fe2c4—157     | -3170.610597 | 28.3 |
| 282 | 10v-07-Isocloso—fe2c4—868       | -3170.610568 | 28.3 |
| 283 | 10v-07-Isocloso—fe2c4—788       | -3170.610546 | 28.3 |
| 284 | 10v-07-Isocloso—fe2c4—786       | -3170.610485 | 28.4 |
| 285 | 10v-07-Isocloso—fe2c4—792       | -3170.610485 | 28.4 |
| 286 | 10v-08-BicapSqAntipr—fe2c4—1691 | -3170.610207 | 28.6 |
| 287 | 10v-03-BicapCubD4h—fe2c4—381    | -3170.609851 | 28.8 |
| 288 | 10v-07-Isocloso—fe2c4—898       | -3170.609841 | 28.8 |
| 289 | 10v-07-Isocloso—fe2c4—880       | -3170.609836 | 28.8 |
| 290 | 10v-07-Isocloso—fe2c4—903       | -3170.609827 | 28.8 |
| 291 | 10v-07-Isocloso—fe2c4—905       | -3170.609777 | 28.8 |
| 292 | 10v-07-Isocloso—fe2c4—881       | -3170.609774 | 28.8 |
| 293 | 10v-02-trcTriPri2—fe2c4—254     | -3170.609741 | 28.8 |
| 294 | 10v-02-trcTriPri2—fe2c4—268     | -3170.609741 | 28.8 |
| 295 | 10v-02-trcTriPri2—fe2c4—280     | -3170.609741 | 28.8 |
| 296 | 10v-03-BicapCubD4h—fe2c4—391    | -3170.609701 | 28.9 |
| 297 | 10v-01-trcTriPri1—fe2c4—100     | -3170.60969  | 28.9 |
| 298 | 10v-01-trcTriPri1—fe2c4—94      | -3170.60969  | 28.9 |
| 299 | 10v-02-trcTriPri2—fe2c4—220     | -3170.609681 | 28.9 |
| 300 | 10v-02-trcTriPri2—fe2c4—270     | -3170.609681 | 28.9 |
| 301 | 10v-07-Isocloso—fe2c4—1054      | -3170.609642 | 28.9 |
| 302 | 10v-09-Bisdisph—fe2c4—1722      | -3170.609618 | 28.9 |

|     |                                 |              |      |
|-----|---------------------------------|--------------|------|
| 303 | 10v-01-trcTriPri1—fe2c4—88      | -3170.609537 | 29.0 |
| 304 | 10v-09-Bisdisph—fe2c4—1741      | -3170.609532 | 29.0 |
| 305 | 10v-09-Bisdisph—fe2c4—1761      | -3170.609532 | 29.0 |
| 306 | 10v-09-Bisdisph—fe2c4—1769      | -3170.609532 | 29.0 |
| 307 | 10v-09-Bisdisph—fe2c4—1719      | -3170.609524 | 29.0 |
| 308 | 10v-09-Bisdisph—fe2c4—1733      | -3170.609448 | 29.0 |
| 309 | 10v-09-Bisdisph—fe2c4—1737      | -3170.609448 | 29.0 |
| 310 | 10v-09-Bisdisph—fe2c4—1793      | -3170.609448 | 29.0 |
| 311 | 10v-09-Bisdisph—fe2c4—1813      | -3170.609446 | 29.0 |
| 312 | 10v-09-Bisdisph—fe2c4—1803      | -3170.609444 | 29.0 |
| 313 | 10v-06-AntiPr—fe2c4—738         | -3170.609423 | 29.0 |
| 314 | 10v-05-PentagPrism—fe2c4—586    | -3170.609417 | 29.1 |
| 315 | 10v-05-PentagPrism—fe2c4—604    | -3170.609417 | 29.1 |
| 316 | 10v-05-PentagPrism—fe2c4—628    | -3170.609417 | 29.1 |
| 317 | 10v-07-Isocloso—fe2c4—1156      | -3170.609411 | 29.1 |
| 318 | 10v-06-AntiPr—fe2c4—704         | -3170.609392 | 29.1 |
| 319 | 10v-08-BicapSqAntipr—fe2c4—1263 | -3170.609386 | 29.1 |
| 320 | 10v-07-Isocloso—fe2c4—1154      | -3170.6093   | 29.1 |
| 321 | 10v-05-PentagPrism—fe2c4—525    | -3170.609289 | 29.1 |
| 322 | 10v-05-PentagPrism—fe2c4—561    | -3170.609289 | 29.1 |
| 323 | 10v-05-PentagPrism—fe2c4—593    | -3170.609289 | 29.1 |
| 324 | 10v-09-Bisdisph—fe2c4—1801      | -3170.60928  | 29.1 |
| 325 | 10v-09-Bisdisph—fe2c4—1775      | -3170.609137 | 29.2 |
| 326 | 10v-07-Isocloso—fe2c4—1152      | -3170.609098 | 29.3 |
| 327 | 10v-01-trcTriPri1—fe2c4—25      | -3170.608989 | 29.3 |
| 328 | 10v-05-PentagPrism—fe2c4—647    | -3170.608974 | 29.3 |
| 329 | 10v-09-Bisdisph—fe2c4—1997      | -3170.60895  | 29.3 |
| 330 | 10v-05-PentagPrism—fe2c4—600    | -3170.608936 | 29.4 |
| 331 | 10v-05-PentagPrism—fe2c4—590    | -3170.608918 | 29.4 |
| 332 | 10v-05-PentagPrism—fe2c4—608    | -3170.608918 | 29.4 |
| 333 | 10v-07-Isocloso—fe2c4—1190      | -3170.608892 | 29.4 |
| 334 | 10v-07-Isocloso—fe2c4—1198      | -3170.608892 | 29.4 |
| 335 | 10v-07-Isocloso—fe2c4—1222      | -3170.60889  | 29.4 |
| 336 | 10v-07-Isocloso—fe2c4—1226      | -3170.60889  | 29.4 |
| 337 | 10v-05-PentagPrism—fe2c4—552    | -3170.608886 | 29.4 |
| 338 | 10v-05-PentagPrism—fe2c4—570    | -3170.608886 | 29.4 |
| 339 | 10v-05-PentagPrism—fe2c4—576    | -3170.608886 | 29.4 |
| 340 | 10v-05-PentagPrism—fe2c4—606    | -3170.608886 | 29.4 |
| 341 | 10v-09-Bisdisph—fe2c4—1720      | -3170.608861 | 29.4 |
| 342 | 10v-09-Bisdisph—fe2c4—1807      | -3170.60886  | 29.4 |
| 343 | 10v-09-Bisdisph—fe2c4—1742      | -3170.608859 | 29.4 |
| 344 | 10v-06-AntiPr—fe2c4—748         | -3170.608838 | 29.4 |
| 345 | 10v-09-Bisdisph—fe2c4—1924      | -3170.608782 | 29.4 |
| 346 | 10v-09-Bisdisph—fe2c4—1776      | -3170.608746 | 29.5 |
| 347 | 10v-07-Isocloso—fe2c4—1194      | -3170.608686 | 29.5 |
| 348 | 10v-07-Isocloso—fe2c4—1206      | -3170.608686 | 29.5 |
| 349 | 10v-07-Isocloso—fe2c4—1230      | -3170.608683 | 29.5 |
| 350 | 10v-01-trcTriPri1—fe2c4—90      | -3170.608643 | 29.5 |
| 351 | 10v-09-Bisdisph—fe2c4—1819      | -3170.608637 | 29.5 |
| 352 | 10v-09-Bisdisph—fe2c4—1767      | -3170.608631 | 29.5 |
| 353 | 10v-05-PentagPrism—fe2c4—512    | -3170.608553 | 29.6 |

|     |                      |       |      |              |      |
|-----|----------------------|-------|------|--------------|------|
| 354 | 10v-05-PentagPrism   | fe2c4 | 544  | -3170.608552 | 29.6 |
| 355 | 10v-05-PentagPrism   | fe2c4 | 595  | -3170.608543 | 29.6 |
| 356 | 10v-05-PentagPrism   | fe2c4 | 554  | -3170.608523 | 29.6 |
| 357 | 10v-05-PentagPrism   | fe2c4 | 620  | -3170.608523 | 29.6 |
| 358 | 10v-05-PentagPrism   | fe2c4 | 636  | -3170.608523 | 29.6 |
| 359 | 10v-05-PentagPrism   | fe2c4 | 568  | -3170.608459 | 29.7 |
| 360 | 10v-05-PentagPrism   | fe2c4 | 630  | -3170.608445 | 29.7 |
| 361 | 10v-05-PentagPrism   | fe2c4 | 574  | -3170.608444 | 29.7 |
| 362 | 10v-05-PentagPrism   | fe2c4 | 558  | -3170.608443 | 29.7 |
| 363 | 10v-05-PentagPrism   | fe2c4 | 624  | -3170.608442 | 29.7 |
| 364 | 10v-07-Isocloso      | fe2c4 | 895  | -3170.608433 | 29.7 |
| 365 | 10v-07-Isocloso      | fe2c4 | 931  | -3170.608433 | 29.7 |
| 366 | 10v-07-Isocloso      | fe2c4 | 999  | -3170.608429 | 29.7 |
| 367 | 10v-07-Isocloso      | fe2c4 | 951  | -3170.608427 | 29.7 |
| 368 | 10v-07-Isocloso      | fe2c4 | 987  | -3170.608427 | 29.7 |
| 369 | 10v-10-DistTcapOh    | fe2c4 | 2021 | -3170.608296 | 29.8 |
| 370 | 10v-10-DistTcapOh    | fe2c4 | 2009 | -3170.608282 | 29.8 |
| 371 | 10v-10-DistTcapOh    | fe2c4 | 2015 | -3170.608281 | 29.8 |
| 372 | 10v-09-Bisdisph      | fe2c4 | 1827 | -3170.60824  | 29.8 |
| 373 | 10v-09-Bisdisph      | fe2c4 | 1833 | -3170.60824  | 29.8 |
| 374 | 10v-09-Bisdisph      | fe2c4 | 1841 | -3170.60824  | 29.8 |
| 375 | 10v-09-Bisdisph      | fe2c4 | 1845 | -3170.60824  | 29.8 |
| 376 | 10v-08-BicapSqAntipr | fe2c4 | 1271 | -3170.608178 | 29.8 |
| 377 | 10v-08-BicapSqAntipr | fe2c4 | 1295 | -3170.60816  | 29.8 |
| 378 | 10v-09-Bisdisph      | fe2c4 | 1985 | -3170.608042 | 29.9 |
| 379 | 10v-09-Bisdisph      | fe2c4 | 1898 | -3170.607964 | 30.0 |
| 380 | 10v-09-Bisdisph      | fe2c4 | 1945 | -3170.60796  | 30.0 |
| 381 | 10v-09-Bisdisph      | fe2c4 | 1921 | -3170.607954 | 30.0 |
| 382 | 10v-09-Bisdisph      | fe2c4 | 1902 | -3170.607714 | 30.1 |
| 383 | 10v-06-AntiPr        | fe2c4 | 730  | -3170.607652 | 30.2 |
| 384 | 10v-09-Bisdisph      | fe2c4 | 1991 | -3170.607497 | 30.3 |
| 385 | 10v-09-Bisdisph      | fe2c4 | 1915 | -3170.607496 | 30.3 |
| 386 | 10v-09-Bisdisph      | fe2c4 | 1939 | -3170.607491 | 30.3 |
| 387 | 10v-03-BicapCubC2v   | fe2c4 | 371  | -3170.606913 | 30.6 |
| 388 | 10v-08-BicapSqAntipr | fe2c4 | 1647 | -3170.605987 | 31.2 |
| 389 | 10v-07-Isocloso      | fe2c4 | 874  | -3170.605809 | 31.3 |
| 390 | 10v-08-BicapSqAntipr | fe2c4 | 1642 | -3170.605787 | 31.3 |
| 391 | 10v-07-Isocloso      | fe2c4 | 802  | -3170.605773 | 31.3 |
| 392 | 10v-07-Isocloso      | fe2c4 | 803  | -3170.605761 | 31.3 |
| 393 | 10v-07-Isocloso      | fe2c4 | 815  | -3170.605744 | 31.4 |
| 394 | 10v-07-Isocloso      | fe2c4 | 875  | -3170.605744 | 31.4 |
| 395 | 10v-08-BicapSqAntipr | fe2c4 | 1659 | -3170.605725 | 31.4 |
| 396 | 10v-08-BicapSqAntipr | fe2c4 | 1632 | -3170.605679 | 31.4 |
| 397 | 10v-08-BicapSqAntipr | fe2c4 | 1618 | -3170.605676 | 31.4 |
| 398 | 10v-07-Isocloso      | fe2c4 | 893  | -3170.60509  | 31.8 |
| 399 | 10v-07-Isocloso      | fe2c4 | 941  | -3170.60509  | 31.8 |
| 400 | 10v-06-AntiPr        | fe2c4 | 664  | -3170.605023 | 31.8 |
| 401 | 10v-03-BicapCubD4h   | fe2c4 | 376  | -3170.604995 | 31.8 |
| 402 | 10v-03-BicapCubD4h   | fe2c4 | 392  | -3170.604984 | 31.8 |
| 403 | 10v-08-BicapSqAntipr | fe2c4 | 1639 | -3170.604978 | 31.8 |
| 404 | 10v-08-BicapSqAntipr | fe2c4 | 1534 | -3170.604971 | 31.8 |

|     |                                     |              |      |
|-----|-------------------------------------|--------------|------|
| 405 | 10v-07-Isocloso — fe2c4 — 776       | -3170.604946 | 31.9 |
| 406 | 10v-07-Isocloso — fe2c4 — 787       | -3170.604946 | 31.9 |
| 407 | 10v-08-BicapSqAntipr — fe2c4 — 1522 | -3170.604911 | 31.9 |
| 408 | 10v-02-trcTriPri2 — fe2c4 — 129     | -3170.604871 | 31.9 |
| 409 | 10v-02-trcTriPri2 — fe2c4 — 103     | -3170.60485  | 31.9 |
| 410 | 10v-02-trcTriPri2 — fe2c4 — 109     | -3170.60485  | 31.9 |
| 411 | 10v-02-trcTriPri2 — fe2c4 — 143     | -3170.60485  | 31.9 |
| 412 | 10v-02-trcTriPri2 — fe2c4 — 167     | -3170.60485  | 31.9 |
| 413 | 10v-08-BicapSqAntipr — fe2c4 — 1621 | -3170.604697 | 32.0 |
| 414 | 10v-08-BicapSqAntipr — fe2c4 — 1635 | -3170.604673 | 32.0 |
| 415 | 10v-08-BicapSqAntipr — fe2c4 — 1610 | -3170.604451 | 32.2 |
| 416 | 10v-07-Isocloso — fe2c4 — 1078      | -3170.604447 | 32.2 |
| 417 | 10v-08-BicapSqAntipr — fe2c4 — 1683 | -3170.604387 | 32.2 |
| 418 | 10v-08-BicapSqAntipr — fe2c4 — 1709 | -3170.604351 | 32.2 |
| 419 | 10v-08-BicapSqAntipr — fe2c4 — 1675 | -3170.60432  | 32.2 |
| 420 | 10v-07-Isocloso — fe2c4 — 1210      | -3170.603772 | 32.6 |
| 421 | 10v-02-trcTriPri2 — fe2c4 — 277     | -3170.603711 | 32.6 |
| 422 | 10v-02-trcTriPri2 — fe2c4 — 289     | -3170.603711 | 32.6 |
| 423 | 10v-02-trcTriPri2 — fe2c4 — 297     | -3170.603711 | 32.6 |
| 424 | 10v-02-trcTriPri2 — fe2c4 — 248     | -3170.60366  | 32.7 |
| 425 | 10v-07-Isocloso — fe2c4 — 859       | -3170.603563 | 32.7 |
| 426 | 10v-07-Isocloso — fe2c4 — 870       | -3170.603561 | 32.7 |
| 427 | 10v-07-Isocloso — fe2c4 — 822       | -3170.603551 | 32.7 |
| 428 | 10v-07-Isocloso — fe2c4 — 823       | -3170.603529 | 32.7 |
| 429 | 10v-07-Isocloso — fe2c4 — 845       | -3170.603529 | 32.7 |
| 430 | 10v-08-BicapSqAntipr — fe2c4 — 1403 | -3170.603493 | 32.8 |
| 431 | 10v-08-BicapSqAntipr — fe2c4 — 1628 | -3170.603478 | 32.8 |
| 432 | 10v-07-Isocloso — fe2c4 — 1162      | -3170.60344  | 32.8 |
| 433 | 10v-06-AntiPr — fe2c4 — 762         | -3170.603419 | 32.8 |
| 434 | 10v-06-AntiPr — fe2c4 — 755         | -3170.603407 | 32.8 |
| 435 | 10v-09-Bisdisph — fe2c4 — 1724      | -3170.603389 | 32.8 |
| 436 | 10v-07-Isocloso — fe2c4 — 1053      | -3170.603366 | 32.8 |
| 437 | 10v-09-Bisdisph — fe2c4 — 1718      | -3170.603362 | 32.9 |
| 438 | 10v-09-Bisdisph — fe2c4 — 1717      | -3170.603358 | 32.9 |
| 439 | 10v-09-Bisdisph — fe2c4 — 1723      | -3170.603345 | 32.9 |
| 440 | 10v-09-Bisdisph — fe2c4 — 1751      | -3170.603345 | 32.9 |
| 441 | 10v-09-Bisdisph — fe2c4 — 1759      | -3170.603345 | 32.9 |
| 442 | 10v-09-Bisdisph — fe2c4 — 1777      | -3170.603324 | 32.9 |
| 443 | 10v-05-PentagPrism — fe2c4 — 562    | -3170.603319 | 32.9 |
| 444 | 10v-05-PentagPrism — fe2c4 — 594    | -3170.603319 | 32.9 |
| 445 | 10v-06-AntiPr — fe2c4 — 732         | -3170.603319 | 32.9 |
| 446 | 10v-08-BicapSqAntipr — fe2c4 — 1693 | -3170.603317 | 32.9 |
| 447 | 10v-05-PentagPrism — fe2c4 — 652    | -3170.603296 | 32.9 |
| 448 | 10v-08-BicapSqAntipr — fe2c4 — 1359 | -3170.603279 | 32.9 |
| 449 | 10v-08-BicapSqAntipr — fe2c4 — 1371 | -3170.603279 | 32.9 |
| 450 | 10v-06-AntiPr — fe2c4 — 744         | -3170.603269 | 32.9 |
| 451 | 10v-08-BicapSqAntipr — fe2c4 — 1348 | -3170.603254 | 32.9 |
| 452 | 10v-09-Bisdisph — fe2c4 — 1809      | -3170.603144 | 33.0 |
| 453 | 10v-09-Bisdisph — fe2c4 — 1732      | -3170.603116 | 33.0 |
| 454 | 10v-09-Bisdisph — fe2c4 — 1744      | -3170.603116 | 33.0 |
| 455 | 10v-05-PentagPrism — fe2c4 — 602    | -3170.603096 | 33.0 |

|     |                                 |              |      |
|-----|---------------------------------|--------------|------|
| 456 | 10v-05-PentagPrism—fe2c4—610    | -3170.603096 | 33.0 |
| 457 | 10v-05-PentagPrism—fe2c4—658    | -3170.603092 | 33.0 |
| 458 | 10v-09-Bisdisph—fe2c4—1949      | -3170.603065 | 33.0 |
| 459 | 10v-05-PentagPrism—fe2c4—589    | -3170.602869 | 33.2 |
| 460 | 10v-05-PentagPrism—fe2c4—607    | -3170.602869 | 33.2 |
| 461 | 10v-01-trcTriPri1—fe2c4—78      | -3170.602769 | 33.2 |
| 462 | 10v-05-PentagPrism—fe2c4—619    | -3170.602673 | 33.3 |
| 463 | 10v-05-PentagPrism—fe2c4—518    | -3170.602669 | 33.3 |
| 464 | 10v-07-Isocloso—fe2c4—1057      | -3170.602668 | 33.3 |
| 465 | 10v-07-Isocloso—fe2c4—1147      | -3170.60259  | 33.3 |
| 466 | 10v-07-Isocloso—fe2c4—1219      | -3170.60259  | 33.3 |
| 467 | 10v-09-Bisdisph—fe2c4—1785      | -3170.602559 | 33.4 |
| 468 | 10v-08-BicapSqAntipr—fe2c4—1695 | -3170.602501 | 33.4 |
| 469 | 10v-08-BicapSqAntipr—fe2c4—1701 | -3170.602386 | 33.5 |
| 470 | 10v-08-BicapSqAntipr—fe2c4—1630 | -3170.60235  | 33.5 |
| 471 | 10v-05-PentagPrism—fe2c4—507    | -3170.602338 | 33.5 |
| 472 | 10v-05-PentagPrism—fe2c4—521    | -3170.602338 | 33.5 |
| 473 | 10v-05-PentagPrism—fe2c4—531    | -3170.602338 | 33.5 |
| 474 | 10v-05-PentagPrism—fe2c4—557    | -3170.602338 | 33.5 |
| 475 | 10v-05-PentagPrism—fe2c4—567    | -3170.602338 | 33.5 |
| 476 | 10v-05-PentagPrism—fe2c4—623    | -3170.602338 | 33.5 |
| 477 | 10v-05-PentagPrism—fe2c4—583    | -3170.602047 | 33.7 |
| 478 | 10v-07-Isocloso—fe2c4—1017      | -3170.60199  | 33.7 |
| 479 | 10v-09-Bisdisph—fe2c4—1816      | -3170.601878 | 33.8 |
| 480 | 10v-01-trcTriPri1—fe2c4—89      | -3170.601857 | 33.8 |
| 481 | 10v-01-trcTriPri1—fe2c4—61      | -3170.601835 | 33.8 |
| 482 | 10v-09-Bisdisph—fe2c4—1794      | -3170.601805 | 33.8 |
| 483 | 10v-09-Bisdisph—fe2c4—1804      | -3170.601798 | 33.8 |
| 484 | 10v-07-Isocloso—fe2c4—1221      | -3170.601732 | 33.9 |
| 485 | 10v-07-Isocloso—fe2c4—1225      | -3170.601732 | 33.9 |
| 486 | 10v-07-Isocloso—fe2c4—1212      | -3170.601656 | 33.9 |
| 487 | 10v-07-Isocloso—fe2c4—1224      | -3170.601654 | 33.9 |
| 488 | 10v-09-Bisdisph—fe2c4—1901      | -3170.601571 | 34.0 |
| 489 | 10v-09-Bisdisph—fe2c4—1967      | -3170.60154  | 34.0 |
| 490 | 10v-09-Bisdisph—fe2c4—1931      | -3170.601522 | 34.0 |
| 491 | 10v-06-AntiPr—fe2c4—756         | -3170.601514 | 34.0 |
| 492 | 10v-09-Bisdisph—fe2c4—1925      | -3170.60151  | 34.0 |
| 493 | 10v-09-Bisdisph—fe2c4—1907      | -3170.601502 | 34.0 |
| 494 | 10v-09-Bisdisph—fe2c4—1748      | -3170.601491 | 34.0 |
| 495 | 10v-09-Bisdisph—fe2c4—1754      | -3170.601491 | 34.0 |
| 496 | 10v-09-Bisdisph—fe2c4—1772      | -3170.601491 | 34.0 |
| 497 | 10v-05-PentagPrism—fe2c4—582    | -3170.60147  | 34.0 |
| 498 | 10v-05-PentagPrism—fe2c4—657    | -3170.601447 | 34.1 |
| 499 | 10v-09-Bisdisph—fe2c4—1795      | -3170.601424 | 34.1 |
| 500 | 10v-07-Isocloso—fe2c4—1204      | -3170.601403 | 34.1 |
| 501 | 10v-07-Isocloso—fe2c4—1218      | -3170.6014   | 34.1 |
| 502 | 10v-07-Isocloso—fe2c4—1182      | -3170.601394 | 34.1 |
| 503 | 10v-07-Isocloso—fe2c4—1188      | -3170.601394 | 34.1 |
| 504 | 10v-08-BicapSqAntipr—fe2c4—1624 | -3170.601176 | 34.2 |
| 505 | 10v-02-trcTriPri2—fe2c4—204     | -3170.601114 | 34.3 |
| 506 | 10v-02-trcTriPri2—fe2c4—257     | -3170.601114 | 34.3 |



|     |                                     |              |      |
|-----|-------------------------------------|--------------|------|
| 507 | 10v-08-BicapSqAntipr — fe2c4 — 1617 | -3170.601052 | 34.3 |
| 508 | 10v-07-Isocloso — fe2c4 — 1122      | -3170.601049 | 34.3 |
| 509 | 10v-07-Isocloso — fe2c4 — 1086      | -3170.601029 | 34.3 |
| 510 | 10v-07-Isocloso — fe2c4 — 1090      | -3170.601029 | 34.3 |
| 511 | 10v-08-BicapSqAntipr — fe2c4 — 1649 | -3170.601022 | 34.3 |
| 512 | 10v-07-Isocloso — fe2c4 — 1120      | -3170.601002 | 34.3 |
| 513 | 10v-07-Isocloso — fe2c4 — 1091      | -3170.600968 | 34.4 |
| 514 | 10v-02-trcTriPri2 — fe2c4 — 233     | -3170.600957 | 34.4 |
| 515 | 10v-03-BicapCubC2v — fe2c4 — 325    | -3170.600948 | 34.4 |
| 516 | 10v-03-BicapCubC2v — fe2c4 — 331    | -3170.600947 | 34.4 |
| 517 | 10v-07-Isocloso — fe2c4 — 1121      | -3170.600947 | 34.4 |
| 518 | 10v-02-trcTriPri2 — fe2c4 — 207     | -3170.60092  | 34.4 |
| 519 | 10v-02-trcTriPri2 — fe2c4 — 225     | -3170.60092  | 34.4 |
| 520 | 10v-02-trcTriPri2 — fe2c4 — 231     | -3170.60092  | 34.4 |
| 521 | 10v-02-trcTriPri2 — fe2c4 — 249     | -3170.60092  | 34.4 |
| 522 | 10v-02-trcTriPri2 — fe2c4 — 275     | -3170.60092  | 34.4 |
| 523 | 10v-08-BicapSqAntipr — fe2c4 — 1380 | -3170.600857 | 34.4 |
| 524 | 10v-08-BicapSqAntipr — fe2c4 — 1364 | -3170.600849 | 34.4 |
| 525 | 10v-08-BicapSqAntipr — fe2c4 — 1388 | -3170.600833 | 34.4 |
| 526 | 10v-02-trcTriPri2 — fe2c4 — 182     | -3170.600812 | 34.5 |
| 527 | 10v-02-trcTriPri2 — fe2c4 — 190     | -3170.60081  | 34.5 |
| 528 | 10v-07-Isocloso — fe2c4 — 1088      | -3170.600802 | 34.5 |
| 529 | 10v-07-Isocloso — fe2c4 — 1098      | -3170.600802 | 34.5 |
| 530 | 10v-07-Isocloso — fe2c4 — 1100      | -3170.600802 | 34.5 |
| 531 | 10v-07-Isocloso — fe2c4 — 1130      | -3170.600802 | 34.5 |
| 532 | 10v-07-Isocloso — fe2c4 — 1092      | -3170.600778 | 34.5 |
| 533 | 10v-07-Isocloso — fe2c4 — 1200      | -3170.600769 | 34.5 |
| 534 | 10v-07-Isocloso — fe2c4 — 1202      | -3170.600769 | 34.5 |
| 535 | 10v-07-Isocloso — fe2c4 — 1118      | -3170.600768 | 34.5 |
| 536 | 10v-08-BicapSqAntipr — fe2c4 — 1376 | -3170.600747 | 34.5 |
| 537 | 10v-08-BicapSqAntipr — fe2c4 — 1382 | -3170.600716 | 34.5 |
| 538 | 10v-08-BicapSqAntipr — fe2c4 — 1378 | -3170.600708 | 34.5 |
| 539 | 10v-05-PentagPrism — fe2c4 — 578    | -3170.600694 | 34.5 |
| 540 | 10v-07-Isocloso — fe2c4 — 774       | -3170.600616 | 34.6 |
| 541 | 10v-06-AntiPr — fe2c4 — 760         | -3170.600585 | 34.6 |
| 542 | 10v-05-PentagPrism — fe2c4 — 560    | -3170.600582 | 34.6 |
| 543 | 10v-08-BicapSqAntipr — fe2c4 — 1653 | -3170.600582 | 34.6 |
| 544 | 10v-05-PentagPrism — fe2c4 — 642    | -3170.60058  | 34.6 |
| 545 | 10v-06-AntiPr — fe2c4 — 742         | -3170.60058  | 34.6 |
| 546 | 10v-02-trcTriPri2 — fe2c4 — 181     | -3170.600578 | 34.6 |
| 547 | 10v-02-trcTriPri2 — fe2c4 — 189     | -3170.600578 | 34.6 |
| 548 | 10v-07-Isocloso — fe2c4 — 1209      | -3170.600566 | 34.6 |
| 549 | 10v-01-trcTriPri1 — fe2c4 — 16      | -3170.600539 | 34.6 |
| 550 | 10v-01-trcTriPri1 — fe2c4 — 34      | -3170.600539 | 34.6 |
| 551 | 10v-07-Isocloso — fe2c4 — 1168      | -3170.600538 | 34.6 |
| 552 | 10v-07-Isocloso — fe2c4 — 1174      | -3170.600538 | 34.6 |
| 553 | 10v-07-Isocloso — fe2c4 — 1178      | -3170.600538 | 34.6 |
| 554 | 10v-09-Bisdisph — fe2c4 — 1747      | -3170.600517 | 34.6 |
| 555 | 10v-09-Bisdisph — fe2c4 — 1771      | -3170.600517 | 34.6 |
| 556 | 10v-09-Bisdisph — fe2c4 — 1753      | -3170.600516 | 34.6 |
| 557 | 10v-05-PentagPrism — fe2c4 — 650    | -3170.600463 | 34.7 |

|     |                                 |              |      |
|-----|---------------------------------|--------------|------|
| 558 | 10v-06-AntiPr—fe2c4—750         | -3170.600453 | 34.7 |
| 559 | 10v-01-trcTriPril—fe2c4—33      | -3170.60038  | 34.7 |
| 560 | 10v-09-Bisdisph—fe2c4—1946      | -3170.600364 | 34.7 |
| 561 | 10v-05-PentagPrism—fe2c4—640    | -3170.600353 | 34.7 |
| 562 | 10v-05-PentagPrism—fe2c4—644    | -3170.600353 | 34.7 |
| 563 | 10v-09-Bisdisph—fe2c4—1928      | -3170.600348 | 34.7 |
| 564 | 10v-09-Bisdisph—fe2c4—1963      | -3170.600346 | 34.7 |
| 565 | 10v-05-PentagPrism—fe2c4—656    | -3170.600342 | 34.7 |
| 566 | 10v-07-Isocloso—fe2c4—1192      | -3170.60027  | 34.8 |
| 567 | 10v-07-Isocloso—fe2c4—1216      | -3170.600258 | 34.8 |
| 568 | 10v-07-Isocloso—fe2c4—1228      | -3170.600258 | 34.8 |
| 569 | 10v-07-Isocloso—fe2c4—1186      | -3170.600252 | 34.8 |
| 570 | 10v-09-Bisdisph—fe2c4—1782      | -3170.60005  | 34.9 |
| 571 | 10v-07-Isocloso—fe2c4—1229      | -3170.599899 | 35.0 |
| 572 | 10v-07-Isocloso—fe2c4—1193      | -3170.599892 | 35.0 |
| 573 | 10v-09-Bisdisph—fe2c4—1899      | -3170.59986  | 35.0 |
| 574 | 10v-09-Bisdisph—fe2c4—1905      | -3170.599857 | 35.1 |
| 575 | 10v-09-Bisdisph—fe2c4—1929      | -3170.599847 | 35.1 |
| 576 | 10v-09-Bisdisph—fe2c4—1955      | -3170.599824 | 35.1 |
| 577 | 10v-09-Bisdisph—fe2c4—1937      | -3170.599817 | 35.1 |
| 578 | 10v-09-Bisdisph—fe2c4—1858      | -3170.599297 | 35.4 |
| 579 | 10v-08-BicapSqAntipr—fe2c4—1291 | -3170.59916  | 35.5 |
| 580 | 10v-08-BicapSqAntipr—fe2c4—1297 | -3170.599134 | 35.5 |
| 581 | 10v-07-Isocloso—fe2c4—1163      | -3170.599101 | 35.5 |
| 582 | 10v-09-Bisdisph—fe2c4—1847      | -3170.59902  | 35.6 |
| 583 | 10v-09-Bisdisph—fe2c4—1829      | -3170.599019 | 35.6 |
| 584 | 10v-09-Bisdisph—fe2c4—1871      | -3170.599019 | 35.6 |
| 585 | 10v-09-Bisdisph—fe2c4—1835      | -3170.599018 | 35.6 |
| 586 | 10v-09-Bisdisph—fe2c4—1853      | -3170.599018 | 35.6 |
| 587 | 10v-07-Isocloso—fe2c4—1195      | -3170.599013 | 35.6 |
| 588 | 10v-08-BicapSqAntipr—fe2c4—1326 | -3170.598426 | 35.9 |
| 589 | 10v-08-BicapSqAntipr—fe2c4—1270 | -3170.598413 | 36.0 |
| 590 | 10v-08-BicapSqAntipr—fe2c4—1294 | -3170.598406 | 36.0 |
| 591 | 10v-07-Isocloso—fe2c4—1003      | -3170.597462 | 36.6 |
| 592 | 10v-07-Isocloso—fe2c4—1011      | -3170.597462 | 36.6 |
| 593 | 10v-04-BicapSqAntipr—fe2c4—413  | -3170.597349 | 36.6 |
| 594 | 10v-08-BicapSqAntipr—fe2c4—1577 | -3170.597223 | 36.7 |
| 595 | 10v-08-BicapSqAntipr—fe2c4—1511 | -3170.597195 | 36.7 |
| 596 | 10v-08-BicapSqAntipr—fe2c4—1537 | -3170.597151 | 36.7 |
| 597 | 10v-03-BicapCubD4h—fe2c4—379    | -3170.59715  | 36.7 |
| 598 | 10v-08-BicapSqAntipr—fe2c4—1543 | -3170.59714  | 36.8 |
| 599 | 10v-04-BicapSqAntipr—fe2c4—403  | -3170.597114 | 36.8 |
| 600 | 10v-07-Isocloso—fe2c4—1157      | -3170.597095 | 36.8 |
| 601 | 10v-03-BicapCubD4h—fe2c4—400    | -3170.597085 | 36.8 |
| 602 | 10v-05-PentagPrism—fe2c4—584    | -3170.59708  | 36.8 |
| 603 | 10v-05-PentagPrism—fe2c4—653    | -3170.597061 | 36.8 |
| 604 | 10v-05-PentagPrism—fe2c4—527    | -3170.597053 | 36.8 |
| 605 | 10v-05-PentagPrism—fe2c4—563    | -3170.597053 | 36.8 |
| 606 | 10v-04-BicapSqAntipr—fe2c4—405  | -3170.597001 | 36.8 |
| 607 | 10v-04-BicapSqAntipr—fe2c4—418  | -3170.596975 | 36.9 |
| 608 | 10v-04-BicapSqAntipr—fe2c4—414  | -3170.596961 | 36.9 |

|     |                                 |              |      |
|-----|---------------------------------|--------------|------|
| 609 | 10v-04-BicapSqAntipr—fe2c4—406  | -3170.596946 | 36.9 |
| 610 | 10v-05-PentagPrism—fe2c4—515    | -3170.59693  | 36.9 |
| 611 | 10v-05-PentagPrism—fe2c4—551    | -3170.59693  | 36.9 |
| 612 | 10v-05-PentagPrism—fe2c4—599    | -3170.596901 | 36.9 |
| 613 | 10v-08-BicapSqAntipr—fe2c4—1249 | -3170.596884 | 36.9 |
| 614 | 10v-08-BicapSqAntipr—fe2c4—1319 | -3170.596875 | 36.9 |
| 615 | 10v-07-Isocloso—fe2c4—993       | -3170.596031 | 37.5 |
| 616 | 10v-08-BicapSqAntipr—fe2c4—1234 | -3170.595792 | 37.6 |
| 617 | 10v-06-AntiPr—fe2c4—697         | -3170.595751 | 37.6 |
| 618 | 10v-09-Bisdisph—fe2c4—1879      | -3170.595716 | 37.6 |
| 619 | 10v-07-Isocloso—fe2c4—915       | -3170.595705 | 37.7 |
| 620 | 10v-08-BicapSqAntipr—fe2c4—1239 | -3170.595697 | 37.7 |
| 621 | 10v-08-BicapSqAntipr—fe2c4—1343 | -3170.595688 | 37.7 |
| 622 | 10v-01-trcTriPri1—fe2c4—37      | -3170.595666 | 37.7 |
| 623 | 10v-06-AntiPr—fe2c4—668         | -3170.595652 | 37.7 |
| 624 | 10v-09-Bisdisph—fe2c4—1765      | -3170.595413 | 37.8 |
| 625 | 10v-09-Bisdisph—fe2c4—1783      | -3170.595413 | 37.8 |
| 626 | 10v-05-PentagPrism—fe2c4—564    | -3170.595401 | 37.8 |
| 627 | 10v-05-PentagPrism—fe2c4—648    | -3170.595401 | 37.8 |
| 628 | 10v-05-PentagPrism—fe2c4—654    | -3170.595396 | 37.8 |
| 629 | 10v-02-trcTriPri2—fe2c4—134     | -3170.594942 | 38.1 |
| 630 | 10v-02-trcTriPri2—fe2c4—170     | -3170.594942 | 38.1 |
| 631 | 10v-08-BicapSqAntipr—fe2c4—1442 | -3170.594913 | 38.2 |
| 632 | 10v-07-Isocloso—fe2c4—789       | -3170.594898 | 38.2 |
| 633 | 10v-07-Isocloso—fe2c4—778       | -3170.594896 | 38.2 |
| 634 | 10v-03-BicapCubC2v—fe2c4—314    | -3170.594881 | 38.2 |
| 635 | 10v-07-Isocloso—fe2c4—838       | -3170.594832 | 38.2 |
| 636 | 10v-07-Isocloso—fe2c4—884       | -3170.594558 | 38.4 |
| 637 | 10v-07-Isocloso—fe2c4—908       | -3170.594558 | 38.4 |
| 638 | 10v-07-Isocloso—fe2c4—920       | -3170.594558 | 38.4 |
| 639 | 10v-08-BicapSqAntipr—fe2c4—1703 | -3170.594436 | 38.5 |
| 640 | 10v-09-Bisdisph—fe2c4—1965      | -3170.594202 | 38.6 |
| 641 | 10v-09-Bisdisph—fe2c4—1938      | -3170.594197 | 38.6 |
| 642 | 10v-09-Bisdisph—fe2c4—1930      | -3170.59419  | 38.6 |
| 643 | 10v-09-Bisdisph—fe2c4—1948      | -3170.594189 | 38.6 |
| 644 | 10v-07-Isocloso—fe2c4—1002      | -3170.593863 | 38.8 |
| 645 | 10v-07-Isocloso—fe2c4—1008      | -3170.593863 | 38.8 |
| 646 | 10v-07-Isocloso—fe2c4—1032      | -3170.593861 | 38.8 |
| 647 | 10v-07-Isocloso—fe2c4—1038      | -3170.593861 | 38.8 |
| 648 | 10v-07-Isocloso—fe2c4—1014      | -3170.59386  | 38.8 |
| 649 | 10v-07-Isocloso—fe2c4—998       | -3170.59386  | 38.8 |
| 650 | 10v-07-Isocloso—fe2c4—891       | -3170.593809 | 38.8 |
| 651 | 10v-07-Isocloso—fe2c4—1220      | -3170.59378  | 38.9 |
| 652 | 10v-07-Isocloso—fe2c4—1196      | -3170.593776 | 38.9 |
| 653 | 10v-10-DistTcapOh—fe2c4—2049    | -3170.593746 | 38.9 |
| 654 | 10v-06-AntiPr—fe2c4—724         | -3170.593687 | 38.9 |
| 655 | 10v-10-DistTcapOh—fe2c4—2023    | -3170.593686 | 38.9 |
| 656 | 10v-06-AntiPr—fe2c4—718         | -3170.593684 | 38.9 |
| 657 | 10v-10-DistTcapOh—fe2c4—2052    | -3170.593679 | 38.9 |
| 658 | 10v-07-Isocloso—fe2c4—961       | -3170.59367  | 38.9 |
| 659 | 10v-07-Isocloso—fe2c4—1015      | -3170.593606 | 39.0 |

|     |                                   |              |      |
|-----|-----------------------------------|--------------|------|
| 660 | 10v-09-Bisdisph— fe2c4 —1838      | -3170.593575 | 39.0 |
| 661 | 10v-04-BicapSqAntipr— fe2c4 —425  | -3170.593555 | 39.0 |
| 662 | 10v-08-BicapSqAntipr— fe2c4 —1235 | -3170.593548 | 39.0 |
| 663 | 10v-08-BicapSqAntipr— fe2c4 —1279 | -3170.593544 | 39.0 |
| 664 | 10v-07-Isocloso— fe2c4 —1020      | -3170.593526 | 39.0 |
| 665 | 10v-07-Isocloso— fe2c4 —1028      | -3170.593519 | 39.0 |
| 666 | 10v-07-Isocloso— fe2c4 —1034      | -3170.593519 | 39.0 |
| 667 | 10v-09-Bisdisph— fe2c4 —1893      | -3170.593519 | 39.0 |
| 668 | 10v-06-AntiPr— fe2c4 —671         | -3170.593483 | 39.0 |
| 669 | 10v-07-Isocloso— fe2c4 —1150      | -3170.593479 | 39.1 |
| 670 | 10v-07-Isocloso— fe2c4 —1158      | -3170.593479 | 39.1 |
| 671 | 10v-10-DistTcapOh— fe2c4 —2028    | -3170.593473 | 39.1 |
| 672 | 10v-08-BicapSqAntipr— fe2c4 —1283 | -3170.593469 | 39.1 |
| 673 | 10v-06-AntiPr— fe2c4 —714         | -3170.593468 | 39.1 |
| 674 | 10v-08-BicapSqAntipr— fe2c4 —1241 | -3170.593467 | 39.1 |
| 675 | 10v-08-BicapSqAntipr— fe2c4 —1247 | -3170.59346  | 39.1 |
| 676 | 10v-08-BicapSqAntipr— fe2c4 —1310 | -3170.593359 | 39.1 |
| 677 | 10v-04-BicapSqAntipr— fe2c4 —412  | -3170.593345 | 39.1 |
| 678 | 10v-08-BicapSqAntipr— fe2c4 —1317 | -3170.593323 | 39.2 |
| 679 | 10v-08-BicapSqAntipr— fe2c4 —1303 | -3170.593322 | 39.2 |
| 680 | 10v-08-BicapSqAntipr— fe2c4 —1335 | -3170.593322 | 39.2 |
| 681 | 10v-05-PentagPrism— fe2c4 —651    | -3170.593296 | 39.2 |
| 682 | 10v-05-PentagPrism— fe2c4 —526    | -3170.593289 | 39.2 |
| 683 | 10v-04-BicapSqAntipr— fe2c4 —415  | -3170.593217 | 39.2 |
| 684 | 10v-05-PentagPrism— fe2c4 —626    | -3170.593176 | 39.2 |
| 685 | 10v-05-PentagPrism— fe2c4 —634    | -3170.593176 | 39.2 |
| 686 | 10v-01-trcTriPri1— fe2c4 —97      | -3170.592619 | 39.6 |
| 687 | 10v-07-Isocloso— fe2c4 —912       | -3170.592316 | 39.8 |
| 688 | 10v-07-Isocloso— fe2c4 —938       | -3170.592316 | 39.8 |
| 689 | 10v-07-Isocloso— fe2c4 —944       | -3170.592316 | 39.8 |
| 690 | 10v-07-Isocloso— fe2c4 —1066      | -3170.592158 | 39.9 |
| 691 | 10v-07-Isocloso— fe2c4 —1072      | -3170.592141 | 39.9 |
| 692 | 10v-09-Bisdisph— fe2c4 —1913      | -3170.592049 | 39.9 |
| 693 | 10v-08-BicapSqAntipr— fe2c4 —1305 | -3170.592031 | 40.0 |
| 694 | 10v-08-BicapSqAntipr— fe2c4 —1341 | -3170.592023 | 40.0 |
| 695 | 10v-07-Isocloso— fe2c4 —956       | -3170.592016 | 40.0 |
| 696 | 10v-08-BicapSqAntipr— fe2c4 —1311 | -3170.592014 | 40.0 |
| 697 | 10v-06-AntiPr— fe2c4 —752         | -3170.592006 | 40.0 |
| 698 | 10v-07-Isocloso— fe2c4 —992       | -3170.592004 | 40.0 |
| 699 | 10v-09-Bisdisph— fe2c4 —1885      | -3170.591984 | 40.0 |
| 700 | 10v-09-Bisdisph— fe2c4 —1891      | -3170.591982 | 40.0 |
| 701 | 10v-07-Isocloso— fe2c4 —921       | -3170.591977 | 40.0 |
| 702 | 10v-06-AntiPr— fe2c4 —764         | -3170.591971 | 40.0 |
| 703 | 10v-07-Isocloso— fe2c4 —1044      | -3170.591884 | 40.1 |
| 704 | 10v-07-Isocloso— fe2c4 —1060      | -3170.591884 | 40.1 |
| 705 | 10v-07-Isocloso— fe2c4 —1151      | -3170.591878 | 40.1 |
| 706 | 10v-02-trcTriPri2— fe2c4 —230     | -3170.591865 | 40.1 |
| 707 | 10v-02-trcTriPri2— fe2c4 —244     | -3170.591865 | 40.1 |
| 708 | 10v-08-BicapSqAntipr— fe2c4 —1340 | -3170.591861 | 40.1 |
| 709 | 10v-09-Bisdisph— fe2c4 —1728      | -3170.591853 | 40.1 |
| 710 | 10v-07-Isocloso— fe2c4 —1077      | -3170.591851 | 40.1 |

|     |                      |       |      |              |      |
|-----|----------------------|-------|------|--------------|------|
| 711 | 10v-08-BicapSqAntipr | fe2c4 | 1389 | -3170.591839 | 40.1 |
| 712 | 10v-08-BicapSqAntipr | fe2c4 | 1383 | -3170.591838 | 40.1 |
| 713 | 10v-04-BicapSqAntipr | fe2c4 | 459  | -3170.591822 | 40.1 |
| 714 | 10v-07-Isocloso      | fe2c4 | 1139 | -3170.591806 | 40.1 |
| 715 | 10v-02-trcTriPri2    | fe2c4 | 205  | -3170.591805 | 40.1 |
| 716 | 10v-02-trcTriPri2    | fe2c4 | 223  | -3170.591805 | 40.1 |
| 717 | 10v-02-trcTriPri2    | fe2c4 | 247  | -3170.591805 | 40.1 |
| 718 | 10v-02-trcTriPri2    | fe2c4 | 253  | -3170.591788 | 40.1 |
| 719 | 10v-02-trcTriPri2    | fe2c4 | 267  | -3170.591788 | 40.1 |
| 720 | 10v-02-trcTriPri2    | fe2c4 | 279  | -3170.591788 | 40.1 |
| 721 | 10v-04-BicapSqAntipr | fe2c4 | 435  | -3170.591788 | 40.1 |
| 722 | 10v-04-BicapSqAntipr | fe2c4 | 429  | -3170.591787 | 40.1 |
| 723 | 10v-04-BicapSqAntipr | fe2c4 | 467  | -3170.591784 | 40.1 |
| 724 | 10v-05-PentagPrism   | fe2c4 | 516  | -3170.591783 | 40.1 |
| 725 | 10v-05-PentagPrism   | fe2c4 | 534  | -3170.591783 | 40.1 |
| 726 | 10v-05-PentagPrism   | fe2c4 | 540  | -3170.591783 | 40.1 |
| 727 | 10v-04-BicapSqAntipr | fe2c4 | 449  | -3170.591772 | 40.1 |
| 728 | 10v-08-BicapSqAntipr | fe2c4 | 1355 | -3170.591772 | 40.1 |
| 729 | 10v-08-BicapSqAntipr | fe2c4 | 1367 | -3170.591769 | 40.1 |
| 730 | 10v-07-Isocloso      | fe2c4 | 1040 | -3170.591758 | 40.1 |
| 731 | 10v-02-trcTriPri2    | fe2c4 | 300  | -3170.591747 | 40.1 |
| 732 | 10v-04-BicapSqAntipr | fe2c4 | 454  | -3170.591746 | 40.1 |
| 733 | 10v-04-BicapSqAntipr | fe2c4 | 466  | -3170.591746 | 40.1 |
| 734 | 10v-02-trcTriPri2    | fe2c4 | 218  | -3170.591741 | 40.1 |
| 735 | 10v-09-Bisdisph      | fe2c4 | 1779 | -3170.591722 | 40.2 |
| 736 | 10v-07-Isocloso      | fe2c4 | 1061 | -3170.591719 | 40.2 |
| 737 | 10v-07-Isocloso      | fe2c4 | 1067 | -3170.591707 | 40.2 |
| 738 | 10v-07-Isocloso      | fe2c4 | 1125 | -3170.591688 | 40.2 |
| 739 | 10v-02-trcTriPri2    | fe2c4 | 217  | -3170.591687 | 40.2 |
| 740 | 10v-02-trcTriPri2    | fe2c4 | 241  | -3170.591687 | 40.2 |
| 741 | 10v-02-trcTriPri2    | fe2c4 | 299  | -3170.591687 | 40.2 |
| 742 | 10v-05-PentagPrism   | fe2c4 | 614  | -3170.591662 | 40.2 |
| 743 | 10v-05-PentagPrism   | fe2c4 | 632  | -3170.591662 | 40.2 |
| 744 | 10v-05-PentagPrism   | fe2c4 | 638  | -3170.591662 | 40.2 |
| 745 | 10v-08-BicapSqAntipr | fe2c4 | 1385 | -3170.591661 | 40.2 |
| 746 | 10v-02-trcTriPri2    | fe2c4 | 284  | -3170.591656 | 40.2 |
| 747 | 10v-08-BicapSqAntipr | fe2c4 | 1393 | -3170.591646 | 40.2 |
| 748 | 10v-07-Isocloso      | fe2c4 | 919  | -3170.591476 | 40.3 |
| 749 | 10v-09-Bisdisph      | fe2c4 | 1910 | -3170.591447 | 40.3 |
| 750 | 10v-07-Isocloso      | fe2c4 | 883  | -3170.591291 | 40.4 |
| 751 | 10v-07-Isocloso      | fe2c4 | 907  | -3170.591289 | 40.4 |
| 752 | 10v-03-BicapCubD4h   | fe2c4 | 388  | -3170.591272 | 40.4 |
| 753 | 10v-10-DistTcapOh    | fe2c4 | 2025 | -3170.591261 | 40.4 |
| 754 | 10v-04-BicapSqAntipr | fe2c4 | 481  | -3170.59118  | 40.5 |
| 755 | 10v-04-BicapSqAntipr | fe2c4 | 499  | -3170.59118  | 40.5 |
| 756 | 10v-07-Isocloso      | fe2c4 | 1107 | -3170.591173 | 40.5 |
| 757 | 10v-10-DistTcapOh    | fe2c4 | 2029 | -3170.591119 | 40.5 |
| 758 | 10v-07-Isocloso      | fe2c4 | 858  | -3170.591088 | 40.6 |
| 759 | 10v-09-Bisdisph      | fe2c4 | 1862 | -3170.591086 | 40.6 |
| 760 | 10v-01-trcTriPri1    | fe2c4 | 73   | -3170.591081 | 40.6 |
| 761 | 10v-01-trcTriPri1    | fe2c4 | 52   | -3170.59107  | 40.6 |

|     |                                 |              |      |
|-----|---------------------------------|--------------|------|
| 762 | 10v-01-trcTriPri1—fe2c4—44      | -3170.591066 | 40.6 |
| 763 | 10v-08-BicapSqAntipr—fe2c4—1260 | -3170.591047 | 40.6 |
| 764 | 10v-08-BicapSqAntipr—fe2c4—1282 | -3170.591039 | 40.6 |
| 765 | 10v-08-BicapSqAntipr—fe2c4—1290 | -3170.591039 | 40.6 |
| 766 | 10v-08-BicapSqAntipr—fe2c4—1246 | -3170.591033 | 40.6 |
| 767 | 10v-08-BicapSqAntipr—fe2c4—1344 | -3170.591032 | 40.6 |
| 768 | 10v-01-trcTriPri1—fe2c4—68      | -3170.591022 | 40.6 |
| 769 | 10v-01-trcTriPri1—fe2c4—80      | -3170.591011 | 40.6 |
| 770 | 10v-08-BicapSqAntipr—fe2c4—1240 | -3170.59101  | 40.6 |
| 771 | 10v-02-trcTriPri2—fe2c4—169     | -3170.590989 | 40.6 |
| 772 | 10v-07-Isocloso—fe2c4—853       | -3170.590971 | 40.6 |
| 773 | 10v-02-trcTriPri2—fe2c4—161     | -3170.590795 | 40.7 |
| 774 | 10v-08-BicapSqAntipr—fe2c4—1670 | -3170.590789 | 40.7 |
| 775 | 10v-02-trcTriPri2—fe2c4—131     | -3170.590775 | 40.7 |
| 776 | 10v-01-trcTriPri1—fe2c4—84      | -3170.590768 | 40.8 |
| 777 | 10v-02-trcTriPri2—fe2c4—121     | -3170.590701 | 40.8 |
| 778 | 10v-02-trcTriPri2—fe2c4—141     | -3170.590681 | 40.8 |
| 779 | 10v-08-BicapSqAntipr—fe2c4—1694 | -3170.590674 | 40.8 |
| 780 | 10v-07-Isocloso—fe2c4—1069      | -3170.590536 | 40.9 |
| 781 | 10v-07-Isocloso—fe2c4—1101      | -3170.590536 | 40.9 |
| 782 | 10v-03-BicapCubC2v—fe2c4—360    | -3170.590499 | 40.9 |
| 783 | 10v-08-BicapSqAntipr—fe2c4—1715 | -3170.590062 | 41.2 |
| 784 | 10v-07-Isocloso—fe2c4—1127      | -3170.589811 | 41.4 |
| 785 | 10v-03-BicapCubC2v—fe2c4—321    | -3170.589802 | 41.4 |
| 786 | 10v-03-BicapCubC2v—fe2c4—311    | -3170.589799 | 41.4 |
| 787 | 10v-07-Isocloso—fe2c4—809       | -3170.589733 | 41.4 |
| 788 | 10v-08-BicapSqAntipr—fe2c4—1394 | -3170.58972  | 41.4 |
| 789 | 10v-07-Isocloso—fe2c4—1079      | -3170.58967  | 41.4 |
| 790 | 10v-08-BicapSqAntipr—fe2c4—1384 | -3170.589585 | 41.5 |
| 791 | 10v-08-BicapSqAntipr—fe2c4—1390 | -3170.589585 | 41.5 |
| 792 | 10v-02-trcTriPri2—fe2c4—255     | -3170.589509 | 41.5 |
| 793 | 10v-02-trcTriPri2—fe2c4—273     | -3170.589509 | 41.5 |
| 794 | 10v-02-trcTriPri2—fe2c4—285     | -3170.589509 | 41.5 |
| 795 | 10v-07-Isocloso—fe2c4—1144      | -3170.589434 | 41.6 |
| 796 | 10v-07-Isocloso—fe2c4—1215      | -3170.589434 | 41.6 |
| 797 | 10v-07-Isocloso—fe2c4—1227      | -3170.589434 | 41.6 |
| 798 | 10v-07-Isocloso—fe2c4—1070      | -3170.589426 | 41.6 |
| 799 | 10v-07-Isocloso—fe2c4—1102      | -3170.589426 | 41.6 |
| 800 | 10v-07-Isocloso—fe2c4—1132      | -3170.589426 | 41.6 |
| 801 | 10v-02-trcTriPri2—fe2c4—202     | -3170.589418 | 41.6 |
| 802 | 10v-02-trcTriPri2—fe2c4—213     | -3170.589418 | 41.6 |
| 803 | 10v-02-trcTriPri2—fe2c4—237     | -3170.589418 | 41.6 |
| 804 | 10v-02-trcTriPri2—fe2c4—287     | -3170.589418 | 41.6 |
| 805 | 10v-09-Bisdisph—fe2c4—1766      | -3170.589395 | 41.6 |
| 806 | 10v-09-Bisdisph—fe2c4—1784      | -3170.589395 | 41.6 |
| 807 | 10v-09-Bisdisph—fe2c4—1721      | -3170.589352 | 41.6 |
| 808 | 10v-07-Isocloso—fe2c4—1187      | -3170.589297 | 41.7 |
| 809 | 10v-07-Isocloso—fe2c4—1145      | -3170.589272 | 41.7 |
| 810 | 10v-07-Isocloso—fe2c4—1217      | -3170.589272 | 41.7 |
| 811 | 10v-09-Bisdisph—fe2c4—1734      | -3170.589265 | 41.7 |
| 812 | 10v-09-Bisdisph—fe2c4—1735      | -3170.589249 | 41.7 |

|     |                                 |              |      |
|-----|---------------------------------|--------------|------|
| 813 | 10v-09-Bisdisph—fe2c4—1763      | -3170.589249 | 41.7 |
| 814 | 10v-01-trcTriPri1—fe2c4—98      | -3170.589168 | 41.8 |
| 815 | 10v-01-trcTriPri1—fe2c4—87      | -3170.58916  | 41.8 |
| 816 | 10v-09-Bisdisph—fe2c4—1815      | -3170.589126 | 41.8 |
| 817 | 10v-01-trcTriPri1—fe2c4—99      | -3170.589108 | 41.8 |
| 818 | 10v-09-Bisdisph—fe2c4—1814      | -3170.589091 | 41.8 |
| 819 | 10v-06-AntiPr—fe2c4—703         | -3170.589074 | 41.8 |
| 820 | 10v-09-Bisdisph—fe2c4—1731      | -3170.589069 | 41.8 |
| 821 | 10v-09-Bisdisph—fe2c4—1743      | -3170.589069 | 41.8 |
| 822 | 10v-09-Bisdisph—fe2c4—1791      | -3170.589069 | 41.8 |
| 823 | 10v-09-Bisdisph—fe2c4—1799      | -3170.589069 | 41.8 |
| 824 | 10v-05-PentagPrism—fe2c4—510    | -3170.588992 | 41.9 |
| 825 | 10v-05-PentagPrism—fe2c4—605    | -3170.588992 | 41.9 |
| 826 | 10v-06-AntiPr—fe2c4—747         | -3170.588988 | 41.9 |
| 827 | 10v-07-Isocloso—fe2c4—965       | -3170.588978 | 41.9 |
| 828 | 10v-06-AntiPr—fe2c4—729         | -3170.588973 | 41.9 |
| 829 | 10v-07-Isocloso—fe2c4—1016      | -3170.588957 | 41.9 |
| 830 | 10v-06-AntiPr—fe2c4—693         | -3170.58893  | 41.9 |
| 831 | 10v-06-AntiPr—fe2c4—699         | -3170.58893  | 41.9 |
| 832 | 10v-09-Bisdisph—fe2c4—1802      | -3170.588796 | 42.0 |
| 833 | 10v-09-Bisdisph—fe2c4—1764      | -3170.588793 | 42.0 |
| 834 | 10v-07-Isocloso—fe2c4—957       | -3170.588754 | 42.0 |
| 835 | 10v-09-Bisdisph—fe2c4—1999      | -3170.588745 | 42.0 |
| 836 | 10v-08-BicapSqAntipr—fe2c4—1233 | -3170.588636 | 42.1 |
| 837 | 10v-05-PentagPrism—fe2c4—585    | -3170.588635 | 42.1 |
| 838 | 10v-05-PentagPrism—fe2c4—603    | -3170.588635 | 42.1 |
| 839 | 10v-05-PentagPrism—fe2c4—627    | -3170.588635 | 42.1 |
| 840 | 10v-01-trcTriPri1—fe2c4—19      | -3170.588625 | 42.1 |
| 841 | 10v-01-trcTriPri1—fe2c4—2       | -3170.588625 | 42.1 |
| 842 | 10v-08-BicapSqAntipr—fe2c4—1259 | -3170.588588 | 42.1 |
| 843 | 10v-08-BicapSqAntipr—fe2c4—1245 | -3170.588586 | 42.1 |
| 844 | 10v-08-BicapSqAntipr—fe2c4—1289 | -3170.588586 | 42.1 |
| 845 | 10v-04-BicapSqAntipr—fe2c4—452  | -3170.588535 | 42.2 |
| 846 | 10v-04-BicapSqAntipr—fe2c4—474  | -3170.588535 | 42.2 |
| 847 | 10v-04-BicapSqAntipr—fe2c4—478  | -3170.588535 | 42.2 |
| 848 | 10v-01-trcTriPri1—fe2c4—70      | -3170.588502 | 42.2 |
| 849 | 10v-01-trcTriPri1—fe2c4—26      | -3170.588487 | 42.2 |
| 850 | 10v-08-BicapSqAntipr—fe2c4—1331 | -3170.588468 | 42.2 |
| 851 | 10v-08-BicapSqAntipr—fe2c4—1323 | -3170.588432 | 42.2 |
| 852 | 10v-04-BicapSqAntipr—fe2c4—472  | -3170.588424 | 42.2 |
| 853 | 10v-01-trcTriPri1—fe2c4—93      | -3170.588366 | 42.3 |
| 854 | 10v-02-trcTriPri2—fe2c4—294     | -3170.588299 | 42.3 |
| 855 | 10v-08-BicapSqAntipr—fe2c4—1256 | -3170.588279 | 42.3 |
| 856 | 10v-08-BicapSqAntipr—fe2c4—1286 | -3170.588268 | 42.3 |
| 857 | 10v-01-trcTriPri1—fe2c4—91      | -3170.588234 | 42.3 |
| 858 | 10v-08-BicapSqAntipr—fe2c4—1329 | -3170.588159 | 42.4 |
| 859 | 10v-05-PentagPrism—fe2c4—615    | -3170.588144 | 42.4 |
| 860 | 10v-07-Isocloso—fe2c4—1141      | -3170.588121 | 42.4 |
| 861 | 10v-07-Isocloso—fe2c4—1169      | -3170.588117 | 42.4 |
| 862 | 10v-07-Isocloso—fe2c4—1175      | -3170.588117 | 42.4 |
| 863 | 10v-07-Isocloso—fe2c4—1183      | -3170.588117 | 42.4 |

|     |                      |       |      |              |      |
|-----|----------------------|-------|------|--------------|------|
| 864 | 10v-07-Isocloso      | fe2c4 | 1179 | -3170.588108 | 42.4 |
| 865 | 10v-02-trcTriPri2    | fe2c4 | 210  | -3170.5881   | 42.4 |
| 866 | 10v-02-trcTriPri2    | fe2c4 | 214  | -3170.5881   | 42.4 |
| 867 | 10v-02-trcTriPri2    | fe2c4 | 228  | -3170.5881   | 42.4 |
| 868 | 10v-02-trcTriPri2    | fe2c4 | 262  | -3170.5881   | 42.4 |
| 869 | 10v-02-trcTriPri2    | fe2c4 | 288  | -3170.5881   | 42.4 |
| 870 | 10v-08-BicapSqAntipr | fe2c4 | 1496 | -3170.587922 | 42.5 |
| 871 | 10v-08-BicapSqAntipr | fe2c4 | 1470 | -3170.587889 | 42.6 |
| 872 | 10v-08-BicapSqAntipr | fe2c4 | 1476 | -3170.587882 | 42.6 |
| 873 | 10v-08-BicapSqAntipr | fe2c4 | 1482 | -3170.587873 | 42.6 |
| 874 | 10v-09-Bisdisph      | fe2c4 | 1756 | -3170.587861 | 42.6 |
| 875 | 10v-08-BicapSqAntipr | fe2c4 | 1484 | -3170.58785  | 42.6 |
| 876 | 10v-02-trcTriPri2    | fe2c4 | 236  | -3170.587791 | 42.6 |
| 877 | 10v-02-trcTriPri2    | fe2c4 | 246  | -3170.587791 | 42.6 |
| 878 | 10v-02-trcTriPri2    | fe2c4 | 259  | -3170.587791 | 42.6 |
| 879 | 10v-07-Isocloso      | fe2c4 | 1059 | -3170.58773  | 42.7 |
| 880 | 10v-07-Isocloso      | fe2c4 | 1071 | -3170.587654 | 42.7 |
| 881 | 10v-09-Bisdisph      | fe2c4 | 2003 | -3170.587618 | 42.7 |
| 882 | 10v-07-Isocloso      | fe2c4 | 1048 | -3170.587586 | 42.8 |
| 883 | 10v-02-trcTriPri2    | fe2c4 | 295  | -3170.587563 | 42.8 |
| 884 | 10v-02-trcTriPri2    | fe2c4 | 301  | -3170.587563 | 42.8 |
| 885 | 10v-08-BicapSqAntipr | fe2c4 | 1349 | -3170.587488 | 42.8 |
| 886 | 10v-08-BicapSqAntipr | fe2c4 | 1373 | -3170.587487 | 42.8 |
| 887 | 10v-08-BicapSqAntipr | fe2c4 | 1361 | -3170.587486 | 42.8 |
| 888 | 10v-08-BicapSqAntipr | fe2c4 | 1409 | -3170.587473 | 42.8 |
| 889 | 10v-07-Isocloso      | fe2c4 | 936  | -3170.587458 | 42.8 |
| 890 | 10v-08-BicapSqAntipr | fe2c4 | 1293 | -3170.587451 | 42.8 |
| 891 | 10v-08-BicapSqAntipr | fe2c4 | 1262 | -3170.587428 | 42.8 |
| 892 | 10v-08-BicapSqAntipr | fe2c4 | 1268 | -3170.587424 | 42.9 |
| 893 | 10v-08-BicapSqAntipr | fe2c4 | 1298 | -3170.587424 | 42.9 |
| 894 | 10v-08-BicapSqAntipr | fe2c4 | 1292 | -3170.58742  | 42.9 |
| 895 | 10v-04-BicapSqAntipr | fe2c4 | 420  | -3170.587406 | 42.9 |
| 896 | 10v-09-Bisdisph      | fe2c4 | 1859 | -3170.587398 | 42.9 |
| 897 | 10v-08-BicapSqAntipr | fe2c4 | 1712 | -3170.587373 | 42.9 |
| 898 | 10v-08-BicapSqAntipr | fe2c4 | 1688 | -3170.587367 | 42.9 |
| 899 | 10v-07-Isocloso      | fe2c4 | 782  | -3170.587283 | 42.9 |
| 900 | 10v-09-Bisdisph      | fe2c4 | 1846 | -3170.587276 | 42.9 |
| 901 | 10v-09-Bisdisph      | fe2c4 | 1852 | -3170.587276 | 42.9 |
| 902 | 10v-07-Isocloso      | fe2c4 | 932  | -3170.587257 | 43.0 |
| 903 | 10v-04-BicapSqAntipr | fe2c4 | 422  | -3170.587228 | 43.0 |
| 904 | 10v-09-Bisdisph      | fe2c4 | 1768 | -3170.587218 | 43.0 |
| 905 | 10v-09-Bisdisph      | fe2c4 | 1820 | -3170.587211 | 43.0 |
| 906 | 10v-07-Isocloso      | fe2c4 | 1023 | -3170.587187 | 43.0 |
| 907 | 10v-07-Isocloso      | fe2c4 | 1029 | -3170.587187 | 43.0 |
| 908 | 10v-07-Isocloso      | fe2c4 | 953  | -3170.587187 | 43.0 |
| 909 | 10v-07-Isocloso      | fe2c4 | 969  | -3170.587187 | 43.0 |
| 910 | 10v-05-PentagPrism   | fe2c4 | 541  | -3170.587168 | 43.0 |
| 911 | 10v-05-PentagPrism   | fe2c4 | 523  | -3170.587167 | 43.0 |
| 912 | 10v-05-PentagPrism   | fe2c4 | 559  | -3170.587167 | 43.0 |
| 913 | 10v-05-PentagPrism   | fe2c4 | 641  | -3170.587167 | 43.0 |
| 914 | 10v-07-Isocloso      | fe2c4 | 1099 | -3170.587155 | 43.0 |



|     |                                 |              |      |
|-----|---------------------------------|--------------|------|
| 915 | 10v-05-PentagPrism—fe2c4—577    | -3170.587151 | 43.0 |
| 916 | 10v-07-Isocloso—fe2c4—1087      | -3170.58715  | 43.0 |
| 917 | 10v-02-trcTriPri2—fe2c4—256     | -3170.587149 | 43.0 |
| 918 | 10v-02-trcTriPri2—fe2c4—274     | -3170.587149 | 43.0 |
| 919 | 10v-02-trcTriPri2—fe2c4—286     | -3170.587149 | 43.0 |
| 920 | 10v-07-Isocloso—fe2c4—1112      | -3170.587127 | 43.0 |
| 921 | 10v-07-Isocloso—fe2c4—1082      | -3170.587109 | 43.0 |
| 922 | 10v-01-trcTriPri1—fe2c4—76      | -3170.587093 | 43.1 |
| 923 | 10v-01-trcTriPri1—fe2c4—96      | -3170.587093 | 43.1 |
| 924 | 10v-07-Isocloso—fe2c4—1185      | -3170.587088 | 43.1 |
| 925 | 10v-07-Isocloso—fe2c4—1143      | -3170.587085 | 43.1 |
| 926 | 10v-07-Isocloso—fe2c4—927       | -3170.587061 | 43.1 |
| 927 | 10v-05-PentagPrism—fe2c4—509    | -3170.587047 | 43.1 |
| 928 | 10v-05-PentagPrism—fe2c4—533    | -3170.587047 | 43.1 |
| 929 | 10v-05-PentagPrism—fe2c4—539    | -3170.587047 | 43.1 |
| 930 | 10v-05-PentagPrism—fe2c4—569    | -3170.587047 | 43.1 |
| 931 | 10v-05-PentagPrism—fe2c4—575    | -3170.587047 | 43.1 |
| 932 | 10v-07-Isocloso—fe2c4—917       | -3170.587046 | 43.1 |
| 933 | 10v-06-AntiPr—fe2c4—706         | -3170.587024 | 43.1 |
| 934 | 10v-09-Bisdisph—fe2c4—1837      | -3170.587018 | 43.1 |
| 935 | 10v-03-BicapCubD4h—fe2c4—396    | -3170.587002 | 43.1 |
| 936 | 10v-01-trcTriPri1—fe2c4—14      | -3170.58698  | 43.1 |
| 937 | 10v-07-Isocloso—fe2c4—952       | -3170.586978 | 43.1 |
| 938 | 10v-07-Isocloso—fe2c4—988       | -3170.586978 | 43.1 |
| 939 | 10v-06-AntiPr—fe2c4—691         | -3170.586974 | 43.1 |
| 940 | 10v-09-Bisdisph—fe2c4—1989      | -3170.586965 | 43.1 |
| 941 | 10v-09-Bisdisph—fe2c4—1981      | -3170.586963 | 43.1 |
| 942 | 10v-01-trcTriPri1—fe2c4—83      | -3170.586918 | 43.2 |
| 943 | 10v-03-BicapCubD4h—fe2c4—402    | -3170.586907 | 43.2 |
| 944 | 10v-01-trcTriPri1—fe2c4—28      | -3170.586853 | 43.2 |
| 945 | 10v-07-Isocloso—fe2c4—886       | -3170.586748 | 43.3 |
| 946 | 10v-06-AntiPr—fe2c4—746         | -3170.586692 | 43.3 |
| 947 | 10v-07-Isocloso—fe2c4—839       | -3170.586543 | 43.4 |
| 948 | 10v-05-PentagPrism—fe2c4—508    | -3170.585818 | 43.9 |
| 949 | 10v-05-PentagPrism—fe2c4—537    | -3170.585818 | 43.9 |
| 950 | 10v-05-PentagPrism—fe2c4—573    | -3170.585818 | 43.9 |
| 951 | 10v-05-PentagPrism—fe2c4—629    | -3170.585818 | 43.9 |
| 952 | 10v-09-Bisdisph—fe2c4—1952      | -3170.585727 | 43.9 |
| 953 | 10v-08-BicapSqAntipr—fe2c4—1559 | -3170.585725 | 43.9 |
| 954 | 10v-08-BicapSqAntipr—fe2c4—1531 | -3170.585711 | 43.9 |
| 955 | 10v-09-Bisdisph—fe2c4—1738      | -3170.585678 | 43.9 |
| 956 | 10v-08-BicapSqAntipr—fe2c4—1523 | -3170.585558 | 44.0 |
| 957 | 10v-08-BicapSqAntipr—fe2c4—1358 | -3170.585557 | 44.0 |
| 958 | 10v-02-trcTriPri2—fe2c4—212     | -3170.585528 | 44.0 |
| 959 | 10v-02-trcTriPri2—fe2c4—222     | -3170.585528 | 44.0 |
| 960 | 10v-02-trcTriPri2—fe2c4—260     | -3170.585528 | 44.0 |
| 961 | 10v-02-trcTriPri2—fe2c4—282     | -3170.585528 | 44.0 |
| 962 | 10v-03-BicapCubC2v—fe2c4—320    | -3170.585366 | 44.1 |
| 963 | 10v-08-BicapSqAntipr—fe2c4—1460 | -3170.58534  | 44.2 |
| 964 | 10v-03-BicapCubC2v—fe2c4—334    | -3170.585253 | 44.2 |
| 965 | 10v-08-BicapSqAntipr—fe2c4—1525 | -3170.585219 | 44.2 |

|      |                      |       |      |              |      |
|------|----------------------|-------|------|--------------|------|
| 966  | 10v-08-BicapSqAntipr | fe2c4 | 1571 | -3170.585211 | 44.2 |
| 967  | 10v-08-BicapSqAntipr | fe2c4 | 1517 | -3170.585177 | 44.3 |
| 968  | 10v-08-BicapSqAntipr | fe2c4 | 1544 | -3170.585177 | 44.3 |
| 969  | 10v-08-BicapSqAntipr | fe2c4 | 1601 | -3170.585157 | 44.3 |
| 970  | 10v-03-BicapCubC2v   | fe2c4 | 358  | -3170.584924 | 44.4 |
| 971  | 10v-03-BicapCubC2v   | fe2c4 | 349  | -3170.584874 | 44.5 |
| 972  | 10v-08-BicapSqAntipr | fe2c4 | 1535 | -3170.584866 | 44.5 |
| 973  | 10v-08-BicapSqAntipr | fe2c4 | 1539 | -3170.584856 | 44.5 |
| 974  | 10v-03-BicapCubC2v   | fe2c4 | 363  | -3170.584812 | 44.5 |
| 975  | 10v-08-BicapSqAntipr | fe2c4 | 1565 | -3170.584706 | 44.6 |
| 976  | 10v-08-BicapSqAntipr | fe2c4 | 1509 | -3170.584703 | 44.6 |
| 977  | 10v-08-BicapSqAntipr | fe2c4 | 1519 | -3170.584692 | 44.6 |
| 978  | 10v-08-BicapSqAntipr | fe2c4 | 1545 | -3170.584631 | 44.6 |
| 979  | 10v-06-AntiPr        | fe2c4 | 743  | -3170.584128 | 44.9 |
| 980  | 10v-06-AntiPr        | fe2c4 | 761  | -3170.584126 | 44.9 |
| 981  | 10v-09-Bisdisph      | fe2c4 | 1927 | -3170.584119 | 44.9 |
| 982  | 10v-01-trcTriPri1    | fe2c4 | 20   | -3170.584113 | 44.9 |
| 983  | 10v-01-trcTriPri1    | fe2c4 | 30   | -3170.584113 | 44.9 |
| 984  | 10v-01-trcTriPri1    | fe2c4 | 8    | -3170.584113 | 44.9 |
| 985  | 10v-09-Bisdisph      | fe2c4 | 1897 | -3170.584113 | 44.9 |
| 986  | 10v-03-BicapCubC2v   | fe2c4 | 365  | -3170.584111 | 44.9 |
| 987  | 10v-06-AntiPr        | fe2c4 | 737  | -3170.584111 | 44.9 |
| 988  | 10v-09-Bisdisph      | fe2c4 | 1903 | -3170.584111 | 44.9 |
| 989  | 10v-09-Bisdisph      | fe2c4 | 1808 | -3170.584058 | 45.0 |
| 990  | 10v-09-Bisdisph      | fe2c4 | 1762 | -3170.584037 | 45.0 |
| 991  | 10v-09-Bisdisph      | fe2c4 | 1770 | -3170.584037 | 45.0 |
| 992  | 10v-09-Bisdisph      | fe2c4 | 1810 | -3170.583914 | 45.1 |
| 993  | 10v-09-Bisdisph      | fe2c4 | 1792 | -3170.583882 | 45.1 |
| 994  | 10v-09-Bisdisph      | fe2c4 | 1800 | -3170.583882 | 45.1 |
| 995  | 10v-08-BicapSqAntipr | fe2c4 | 1521 | -3170.583604 | 45.2 |
| 996  | 10v-08-BicapSqAntipr | fe2c4 | 1613 | -3170.583563 | 45.3 |
| 997  | 10v-06-AntiPr        | fe2c4 | 766  | -3170.583537 | 45.3 |
| 998  | 10v-08-BicapSqAntipr | fe2c4 | 1533 | -3170.583524 | 45.3 |
| 999  | 10v-06-AntiPr        | fe2c4 | 728  | -3170.58352  | 45.3 |
| 1000 | 10v-06-AntiPr        | fe2c4 | 753  | -3170.58349  | 45.3 |
| 1001 | 10v-09-Bisdisph      | fe2c4 | 1746 | -3170.583398 | 45.4 |
| 1002 | 10v-05-PentagPrism   | fe2c4 | 598  | -3170.583334 | 45.4 |
| 1003 | 10v-05-PentagPrism   | fe2c4 | 550  | -3170.583328 | 45.4 |
| 1004 | 10v-05-PentagPrism   | fe2c4 | 588  | -3170.583323 | 45.4 |
| 1005 | 10v-05-PentagPrism   | fe2c4 | 622  | -3170.583323 | 45.4 |
| 1006 | 10v-05-PentagPrism   | fe2c4 | 556  | -3170.583281 | 45.5 |
| 1007 | 10v-05-PentagPrism   | fe2c4 | 511  | -3170.583245 | 45.5 |
| 1008 | 10v-05-PentagPrism   | fe2c4 | 611  | -3170.583245 | 45.5 |
| 1009 | 10v-05-PentagPrism   | fe2c4 | 547  | -3170.583242 | 45.5 |
| 1010 | 10v-05-PentagPrism   | fe2c4 | 543  | -3170.583241 | 45.5 |
| 1011 | 10v-05-PentagPrism   | fe2c4 | 579  | -3170.58324  | 45.5 |
| 1012 | 10v-09-Bisdisph      | fe2c4 | 2004 | -3170.583154 | 45.5 |
| 1013 | 10v-09-Bisdisph      | fe2c4 | 1830 | -3170.58289  | 45.7 |
| 1014 | 10v-09-Bisdisph      | fe2c4 | 1919 | -3170.582582 | 45.9 |
| 1015 | 10v-09-Bisdisph      | fe2c4 | 1961 | -3170.58257  | 45.9 |
| 1016 | 10v-09-Bisdisph      | fe2c4 | 1943 | -3170.582558 | 45.9 |

|      |                      |       |      |              |      |
|------|----------------------|-------|------|--------------|------|
| 1017 | 10v-08-BicapSqAntipr | fe2c4 | 1622 | -3170.582484 | 46.0 |
| 1018 | 10v-08-BicapSqAntipr | fe2c4 | 1615 | -3170.582477 | 46.0 |
| 1019 | 10v-08-BicapSqAntipr | fe2c4 | 1560 | -3170.582416 | 46.0 |
| 1020 | 10v-07-Isocloso      | fe2c4 | 1155 | -3170.582253 | 46.1 |
| 1021 | 10v-08-BicapSqAntipr | fe2c4 | 1575 | -3170.582197 | 46.1 |
| 1022 | 10v-03-BicapCubC2v   | fe2c4 | 333  | -3170.582124 | 46.2 |
| 1023 | 10v-07-Isocloso      | fe2c4 | 1160 | -3170.582115 | 46.2 |
| 1024 | 10v-07-Isocloso      | fe2c4 | 1136 | -3170.582111 | 46.2 |
| 1025 | 10v-07-Isocloso      | fe2c4 | 1166 | -3170.582106 | 46.2 |
| 1026 | 10v-07-Isocloso      | fe2c4 | 1172 | -3170.582106 | 46.2 |
| 1027 | 10v-08-BicapSqAntipr | fe2c4 | 1510 | -3170.582066 | 46.2 |
| 1028 | 10v-08-BicapSqAntipr | fe2c4 | 1520 | -3170.582053 | 46.2 |
| 1029 | 10v-08-BicapSqAntipr | fe2c4 | 1667 | -3170.581973 | 46.3 |
| 1030 | 10v-08-BicapSqAntipr | fe2c4 | 1651 | -3170.581906 | 46.3 |
| 1031 | 10v-08-BicapSqAntipr | fe2c4 | 1529 | -3170.581592 | 46.5 |
| 1032 | 10v-08-BicapSqAntipr | fe2c4 | 1541 | -3170.581586 | 46.5 |
| 1033 | 10v-08-BicapSqAntipr | fe2c4 | 1547 | -3170.581582 | 46.5 |
| 1034 | 10v-08-BicapSqAntipr | fe2c4 | 1513 | -3170.581532 | 46.5 |
| 1035 | 10v-08-BicapSqAntipr | fe2c4 | 1553 | -3170.581524 | 46.6 |
| 1036 | 10v-08-BicapSqAntipr | fe2c4 | 1507 | -3170.581522 | 46.6 |
| 1037 | 10v-03-BicapCubC2v   | fe2c4 | 357  | -3170.581506 | 46.6 |
| 1038 | 10v-08-BicapSqAntipr | fe2c4 | 1274 | -3170.581499 | 46.6 |
| 1039 | 10v-08-BicapSqAntipr | fe2c4 | 1300 | -3170.581499 | 46.6 |
| 1040 | 10v-08-BicapSqAntipr | fe2c4 | 1264 | -3170.581498 | 46.6 |
| 1041 | 10v-08-BicapSqAntipr | fe2c4 | 1250 | -3170.581489 | 46.6 |
| 1042 | 10v-08-BicapSqAntipr | fe2c4 | 1320 | -3170.58148  | 46.6 |
| 1043 | 10v-08-BicapSqAntipr | fe2c4 | 1321 | -3170.581412 | 46.6 |
| 1044 | 10v-08-BicapSqAntipr | fe2c4 | 1315 | -3170.581399 | 46.6 |
| 1045 | 10v-03-BicapCubC2v   | fe2c4 | 350  | -3170.581366 | 46.7 |
| 1046 | 10v-03-BicapCubC2v   | fe2c4 | 364  | -3170.58136  | 46.7 |
| 1047 | 10v-03-BicapCubC2v   | fe2c4 | 328  | -3170.581259 | 46.7 |
| 1048 | 10v-08-BicapSqAntipr | fe2c4 | 1435 | -3170.581258 | 46.7 |
| 1049 | 10v-08-BicapSqAntipr | fe2c4 | 1459 | -3170.581207 | 46.8 |
| 1050 | 10v-02-trcTriPri2    | fe2c4 | 133  | -3170.581063 | 46.8 |
| 1051 | 10v-04-BicapSqAntipr | fe2c4 | 411  | -3170.581044 | 46.9 |
| 1052 | 10v-02-trcTriPri2    | fe2c4 | 197  | -3170.580994 | 46.9 |
| 1053 | 10v-09-Bisdisph      | fe2c4 | 1861 | -3170.580908 | 46.9 |
| 1054 | 10v-04-BicapSqAntipr | fe2c4 | 404  | -3170.580902 | 46.9 |
| 1055 | 10v-09-Bisdisph      | fe2c4 | 1855 | -3170.580901 | 46.9 |
| 1056 | 10v-09-Bisdisph      | fe2c4 | 1895 | -3170.580901 | 46.9 |
| 1057 | 10v-09-Bisdisph      | fe2c4 | 1726 | -3170.5809   | 46.9 |
| 1058 | 10v-04-BicapSqAntipr | fe2c4 | 416  | -3170.580873 | 47.0 |
| 1059 | 10v-05-PentagPrism   | fe2c4 | 580  | -3170.580852 | 47.0 |
| 1060 | 10v-05-PentagPrism   | fe2c4 | 548  | -3170.580848 | 47.0 |
| 1061 | 10v-05-PentagPrism   | fe2c4 | 612  | -3170.580848 | 47.0 |
| 1062 | 10v-08-BicapSqAntipr | fe2c4 | 1564 | -3170.580828 | 47.0 |
| 1063 | 10v-05-PentagPrism   | fe2c4 | 596  | -3170.580826 | 47.0 |
| 1064 | 10v-07-Isocloso      | fe2c4 | 899  | -3170.580757 | 47.0 |
| 1065 | 10v-07-Isocloso      | fe2c4 | 935  | -3170.580757 | 47.0 |
| 1066 | 10v-07-Isocloso      | fe2c4 | 930  | -3170.58074  | 47.0 |
| 1067 | 10v-07-Isocloso      | fe2c4 | 942  | -3170.58074  | 47.0 |

|      |                      |       |      |              |      |
|------|----------------------|-------|------|--------------|------|
| 1068 | 10v-07-Isocloso      | fe2c4 | 1021 | -3170.580733 | 47.1 |
| 1069 | 10v-07-Isocloso      | fe2c4 | 1027 | -3170.580733 | 47.1 |
| 1070 | 10v-07-Isocloso      | fe2c4 | 967  | -3170.580733 | 47.1 |
| 1071 | 10v-07-Isocloso      | fe2c4 | 983  | -3170.580733 | 47.1 |
| 1072 | 10v-07-Isocloso      | fe2c4 | 882  | -3170.580718 | 47.1 |
| 1073 | 10v-07-Isocloso      | fe2c4 | 878  | -3170.580672 | 47.1 |
| 1074 | 10v-07-Isocloso      | fe2c4 | 819  | -3170.58064  | 47.1 |
| 1075 | 10v-07-Isocloso      | fe2c4 | 826  | -3170.580638 | 47.1 |
| 1076 | 10v-07-Isocloso      | fe2c4 | 832  | -3170.580638 | 47.1 |
| 1077 | 10v-07-Isocloso      | fe2c4 | 901  | -3170.580635 | 47.1 |
| 1078 | 10v-02-trcTriPri2    | fe2c4 | 159  | -3170.580621 | 47.1 |
| 1079 | 10v-07-Isocloso      | fe2c4 | 780  | -3170.580608 | 47.1 |
| 1080 | 10v-08-BicapSqAntipr | fe2c4 | 1273 | -3170.580518 | 47.2 |
| 1081 | 10v-07-Isocloso      | fe2c4 | 904  | -3170.580515 | 47.2 |
| 1082 | 10v-07-Isocloso      | fe2c4 | 934  | -3170.580513 | 47.2 |
| 1083 | 10v-09-Bisdisph      | fe2c4 | 1966 | -3170.580454 | 47.2 |
| 1084 | 10v-05-PentagPrism   | fe2c4 | 613  | -3170.580431 | 47.2 |
| 1085 | 10v-05-PentagPrism   | fe2c4 | 631  | -3170.580431 | 47.2 |
| 1086 | 10v-05-PentagPrism   | fe2c4 | 637  | -3170.580431 | 47.2 |
| 1087 | 10v-09-Bisdisph      | fe2c4 | 1974 | -3170.580427 | 47.2 |
| 1088 | 10v-09-Bisdisph      | fe2c4 | 1914 | -3170.580385 | 47.3 |
| 1089 | 10v-05-PentagPrism   | fe2c4 | 522  | -3170.580378 | 47.3 |
| 1090 | 10v-05-PentagPrism   | fe2c4 | 532  | -3170.580378 | 47.3 |
| 1091 | 10v-05-PentagPrism   | fe2c4 | 538  | -3170.580378 | 47.3 |
| 1092 | 10v-09-Bisdisph      | fe2c4 | 1956 | -3170.580343 | 47.3 |
| 1093 | 10v-09-Bisdisph      | fe2c4 | 1906 | -3170.580321 | 47.3 |
| 1094 | 10v-02-trcTriPri2    | fe2c4 | 122  | -3170.580245 | 47.4 |
| 1095 | 10v-02-trcTriPri2    | fe2c4 | 142  | -3170.580245 | 47.4 |
| 1096 | 10v-02-trcTriPri2    | fe2c4 | 146  | -3170.580245 | 47.4 |
| 1097 | 10v-02-trcTriPri2    | fe2c4 | 166  | -3170.580245 | 47.4 |
| 1098 | 10v-08-BicapSqAntipr | fe2c4 | 1532 | -3170.580083 | 47.5 |
| 1099 | 10v-08-BicapSqAntipr | fe2c4 | 1576 | -3170.580058 | 47.5 |
| 1100 | 10v-08-BicapSqAntipr | fe2c4 | 1685 | -3170.580055 | 47.5 |
| 1101 | 10v-08-BicapSqAntipr | fe2c4 | 1637 | -3170.580043 | 47.5 |
| 1102 | 10v-08-BicapSqAntipr | fe2c4 | 1619 | -3170.579877 | 47.6 |
| 1103 | 10v-02-trcTriPri2    | fe2c4 | 176  | -3170.579842 | 47.6 |
| 1104 | 10v-08-BicapSqAntipr | fe2c4 | 1643 | -3170.579838 | 47.6 |
| 1105 | 10v-02-trcTriPri2    | fe2c4 | 195  | -3170.579739 | 47.7 |
| 1106 | 10v-07-Isocloso      | fe2c4 | 943  | -3170.579681 | 47.7 |
| 1107 | 10v-07-Isocloso      | fe2c4 | 890  | -3170.57968  | 47.7 |
| 1108 | 10v-07-Isocloso      | fe2c4 | 937  | -3170.57968  | 47.7 |
| 1109 | 10v-08-BicapSqAntipr | fe2c4 | 1625 | -3170.579648 | 47.7 |
| 1110 | 10v-05-PentagPrism   | fe2c4 | 617  | -3170.579634 | 47.7 |
| 1111 | 10v-02-trcTriPri2    | fe2c4 | 183  | -3170.579625 | 47.7 |
| 1112 | 10v-08-BicapSqAntipr | fe2c4 | 1679 | -3170.579602 | 47.8 |
| 1113 | 10v-08-BicapSqAntipr | fe2c4 | 1626 | -3170.579513 | 47.8 |
| 1114 | 10v-03-BicapCubC2v   | fe2c4 | 307  | -3170.579363 | 47.9 |
| 1115 | 10v-03-BicapCubC2v   | fe2c4 | 335  | -3170.579258 | 48.0 |
| 1116 | 10v-01-trcTriPri1    | fe2c4 | 50   | -3170.579111 | 48.1 |
| 1117 | 10v-01-trcTriPri1    | fe2c4 | 74   | -3170.579087 | 48.1 |
| 1118 | 10v-08-BicapSqAntipr | fe2c4 | 1655 | -3170.578768 | 48.3 |

|      |                                 |              |      |
|------|---------------------------------|--------------|------|
| 1119 | 10v-08-BicapSqAntipr—fe2c4—1661 | -3170.578767 | 48.3 |
| 1120 | 10v-02-trcTriPri2—fe2c4—110     | -3170.578651 | 48.4 |
| 1121 | 10v-02-trcTriPri2—fe2c4—116     | -3170.578651 | 48.4 |
| 1122 | 10v-02-trcTriPri2—fe2c4—144     | -3170.578651 | 48.4 |
| 1123 | 10v-02-trcTriPri2—fe2c4—152     | -3170.578651 | 48.4 |
| 1124 | 10v-02-trcTriPri2—fe2c4—168     | -3170.578651 | 48.4 |
| 1125 | 10v-03-BicapCubC2v—fe2c4—327    | -3170.578629 | 48.4 |
| 1126 | 10v-05-PentagPrism—fe2c4—514    | -3170.57815  | 48.7 |
| 1127 | 10v-05-PentagPrism—fe2c4—520    | -3170.57815  | 48.7 |
| 1128 | 10v-05-PentagPrism—fe2c4—621    | -3170.57815  | 48.7 |
| 1129 | 10v-05-PentagPrism—fe2c4—597    | -3170.578142 | 48.7 |
| 1130 | 10v-05-PentagPrism—fe2c4—517    | -3170.578094 | 48.7 |
| 1131 | 10v-05-PentagPrism—fe2c4—553    | -3170.578094 | 48.7 |
| 1132 | 10v-05-PentagPrism—fe2c4—635    | -3170.578094 | 48.7 |
| 1133 | 10v-07-Isocloso—fe2c4—1042      | -3170.577731 | 48.9 |
| 1134 | 10v-09-Bisdisph—fe2c4—1823      | -3170.577691 | 49.0 |
| 1135 | 10v-09-Bisdisph—fe2c4—1740      | -3170.577557 | 49.0 |
| 1136 | 10v-02-trcTriPri2—fe2c4—206     | -3170.577553 | 49.0 |
| 1137 | 10v-02-trcTriPri2—fe2c4—224     | -3170.577553 | 49.0 |
| 1138 | 10v-02-trcTriPri2—fe2c4—278     | -3170.577526 | 49.1 |
| 1139 | 10v-02-trcTriPri2—fe2c4—290     | -3170.577526 | 49.1 |
| 1140 | 10v-02-trcTriPri2—fe2c4—298     | -3170.577526 | 49.1 |
| 1141 | 10v-08-BicapSqAntipr—fe2c4—1354 | -3170.577474 | 49.1 |
| 1142 | 10v-08-BicapSqAntipr—fe2c4—1399 | -3170.577459 | 49.1 |
| 1143 | 10v-07-Isocloso—fe2c4—1063      | -3170.577453 | 49.1 |
| 1144 | 10v-06-AntiPr—fe2c4—754         | -3170.577314 | 49.2 |
| 1145 | 10v-09-Bisdisph—fe2c4—1774      | -3170.576668 | 49.6 |
| 1146 | 10v-07-Isocloso—fe2c4—1134      | -3170.576566 | 49.7 |
| 1147 | 10v-07-Isocloso—fe2c4—1089      | -3170.576505 | 49.7 |
| 1148 | 10v-02-trcTriPri2—fe2c4—203     | -3170.57649  | 49.7 |
| 1149 | 10v-02-trcTriPri2—fe2c4—215     | -3170.57649  | 49.7 |
| 1150 | 10v-02-trcTriPri2—fe2c4—239     | -3170.57649  | 49.7 |
| 1151 | 10v-02-trcTriPri2—fe2c4—263     | -3170.57649  | 49.7 |
| 1152 | 10v-07-Isocloso—fe2c4—1214      | -3170.576403 | 49.8 |
| 1153 | 10v-08-BicapSqAntipr—fe2c4—1370 | -3170.576386 | 49.8 |
| 1154 | 10v-07-Isocloso—fe2c4—1104      | -3170.576328 | 49.8 |
| 1155 | 10v-07-Isocloso—fe2c4—1124      | -3170.576328 | 49.8 |
| 1156 | 10v-01-trcTriPri1—fe2c4—85      | -3170.576208 | 49.9 |
| 1157 | 10v-08-BicapSqAntipr—fe2c4—1333 | -3170.576203 | 49.9 |
| 1158 | 10v-07-Isocloso—fe2c4—1170      | -3170.576118 | 49.9 |
| 1159 | 10v-07-Isocloso—fe2c4—1176      | -3170.576118 | 49.9 |
| 1160 | 10v-07-Isocloso—fe2c4—1184      | -3170.576118 | 49.9 |
| 1161 | 10v-08-BicapSqAntipr—fe2c4—1327 | -3170.576001 | 50.0 |
| 1162 | 10v-01-trcTriPri1—fe2c4—69      | -3170.575993 | 50.0 |
| 1163 | 10v-04-BicapSqAntipr—fe2c4—441  | -3170.575617 | 50.3 |
| 1164 | 10v-04-BicapSqAntipr—fe2c4—447  | -3170.575617 | 50.3 |
| 1165 | 10v-04-BicapSqAntipr—fe2c4—453  | -3170.575617 | 50.3 |
| 1166 | 10v-04-BicapSqAntipr—fe2c4—465  | -3170.575617 | 50.3 |
| 1167 | 10v-08-BicapSqAntipr—fe2c4—1314 | -3170.575612 | 50.3 |
| 1168 | 10v-08-BicapSqAntipr—fe2c4—1258 | -3170.57561  | 50.3 |
| 1169 | 10v-08-BicapSqAntipr—fe2c4—1276 | -3170.575608 | 50.3 |

|      |                                     |              |      |
|------|-------------------------------------|--------------|------|
| 1170 | 10v-08-BicapSqAntipr — fe2c4 — 1288 | -3170.575607 | 50.3 |
| 1171 | 10v-08-BicapSqAntipr — fe2c4 — 1252 | -3170.575604 | 50.3 |
| 1172 | 10v-07-Isocloso — fe2c4 — 813       | -3170.575463 | 50.4 |
| 1173 | 10v-07-Isocloso — fe2c4 — 873       | -3170.575463 | 50.4 |
| 1174 | 10v-07-Isocloso — fe2c4 — 947       | -3170.575271 | 50.5 |
| 1175 | 10v-05-PentagPrism — fe2c4 — 528    | -3170.575199 | 50.5 |
| 1176 | 10v-06-AntiPr — fe2c4 — 662         | -3170.575071 | 50.6 |
| 1177 | 10v-08-BicapSqAntipr — fe2c4 — 1607 | -3170.574994 | 50.7 |
| 1178 | 10v-08-BicapSqAntipr — fe2c4 — 1611 | -3170.574993 | 50.7 |
| 1179 | 10v-08-BicapSqAntipr — fe2c4 — 1548 | -3170.574945 | 50.7 |
| 1180 | 10v-03-BicapCubD4h — fe2c4 — 395    | -3170.574777 | 50.8 |
| 1181 | 10v-08-BicapSqAntipr — fe2c4 — 1589 | -3170.574555 | 50.9 |
| 1182 | 10v-01-trcTriPri1 — fe2c4 — 67      | -3170.574239 | 51.1 |
| 1183 | 10v-01-trcTriPri1 — fe2c4 — 79      | -3170.574239 | 51.1 |
| 1184 | 10v-03-BicapCubC2v — fe2c4 — 324    | -3170.573713 | 51.5 |
| 1185 | 10v-09-Bisdisph — fe2c4 — 1778      | -3170.573432 | 51.6 |
| 1186 | 10v-09-Bisdisph — fe2c4 — 1752      | -3170.573334 | 51.7 |
| 1187 | 10v-09-Bisdisph — fe2c4 — 1760      | -3170.573334 | 51.7 |
| 1188 | 10v-07-Isocloso — fe2c4 — 1004      | -3170.573292 | 51.7 |
| 1189 | 10v-07-Isocloso — fe2c4 — 1012      | -3170.573292 | 51.7 |
| 1190 | 10v-07-Isocloso — fe2c4 — 1018      | -3170.573268 | 51.7 |
| 1191 | 10v-03-BicapCubC2v — fe2c4 — 355    | -3170.573246 | 51.7 |
| 1192 | 10v-01-trcTriPri1 — fe2c4 — 86      | -3170.573209 | 51.8 |
| 1193 | 10v-05-PentagPrism — fe2c4 — 618    | -3170.573207 | 51.8 |
| 1194 | 10v-03-BicapCubC2v — fe2c4 — 370    | -3170.573204 | 51.8 |
| 1195 | 10v-03-BicapCubC2v — fe2c4 — 336    | -3170.573157 | 51.8 |
| 1196 | 10v-05-PentagPrism — fe2c4 — 505    | -3170.573001 | 51.9 |
| 1197 | 10v-05-PentagPrism — fe2c4 — 529    | -3170.573001 | 51.9 |
| 1198 | 10v-05-PentagPrism — fe2c4 — 545    | -3170.573001 | 51.9 |
| 1199 | 10v-05-PentagPrism — fe2c4 — 565    | -3170.573001 | 51.9 |
| 1200 | 10v-05-PentagPrism — fe2c4 — 581    | -3170.572969 | 51.9 |
| 1201 | 10v-05-PentagPrism — fe2c4 — 601    | -3170.572915 | 52.0 |
| 1202 | 10v-05-PentagPrism — fe2c4 — 609    | -3170.572915 | 52.0 |
| 1203 | 10v-09-Bisdisph — fe2c4 — 1971      | -3170.572879 | 52.0 |
| 1204 | 10v-09-Bisdisph — fe2c4 — 1977      | -3170.572878 | 52.0 |
| 1205 | 10v-09-Bisdisph — fe2c4 — 1983      | -3170.572875 | 52.0 |
| 1206 | 10v-07-Isocloso — fe2c4 — 955       | -3170.571947 | 52.6 |
| 1207 | 10v-07-Isocloso — fe2c4 — 979       | -3170.571947 | 52.6 |
| 1208 | 10v-09-Bisdisph — fe2c4 — 1889      | -3170.571789 | 52.7 |
| 1209 | 10v-07-Isocloso — fe2c4 — 948       | -3170.571768 | 52.7 |
| 1210 | 10v-03-BicapCubD4h — fe2c4 — 375    | -3170.571767 | 52.7 |
| 1211 | 10v-10-DistTcapOh — fe2c4 — 2051    | -3170.571727 | 52.7 |
| 1212 | 10v-08-BicapSqAntipr — fe2c4 — 1338 | -3170.571545 | 52.8 |
| 1213 | 10v-08-BicapSqAntipr — fe2c4 — 1302 | -3170.571542 | 52.8 |
| 1214 | 10v-08-BicapSqAntipr — fe2c4 — 1244 | -3170.571541 | 52.8 |
| 1215 | 10v-08-BicapSqAntipr — fe2c4 — 1266 | -3170.571541 | 52.8 |
| 1216 | 10v-08-BicapSqAntipr — fe2c4 — 1280 | -3170.571539 | 52.8 |
| 1217 | 10v-08-BicapSqAntipr — fe2c4 — 1238 | -3170.571537 | 52.8 |
| 1218 | 10v-02-trcTriPri2 — fe2c4 — 291     | -3170.570733 | 53.3 |
| 1219 | 10v-02-trcTriPri2 — fe2c4 — 250     | -3170.570461 | 53.5 |
| 1220 | 10v-02-trcTriPri2 — fe2c4 — 232     | -3170.570457 | 53.5 |

|      |                                     |              |      |
|------|-------------------------------------|--------------|------|
| 1221 | 10v-07-Isocloso — fe2c4 — 1074      | -3170.570281 | 53.6 |
| 1222 | 10v-07-Isocloso — fe2c4 — 1128      | -3170.570281 | 53.6 |
| 1223 | 10v-08-BicapSqAntipr — fe2c4 — 1400 | -3170.57014  | 53.7 |
| 1224 | 10v-08-BicapSqAntipr — fe2c4 — 1392 | -3170.570126 | 53.7 |
| 1225 | 10v-08-BicapSqAntipr — fe2c4 — 1366 | -3170.570095 | 53.7 |
| 1226 | 10v-07-Isocloso — fe2c4 — 1115      | -3170.569933 | 53.8 |
| 1227 | 10v-07-Isocloso — fe2c4 — 1103      | -3170.569908 | 53.8 |
| 1228 | 10v-07-Isocloso — fe2c4 — 1123      | -3170.569908 | 53.8 |
| 1229 | 10v-07-Isocloso — fe2c4 — 1133      | -3170.569908 | 53.8 |
| 1230 | 10v-07-Isocloso — fe2c4 — 810       | -3170.569707 | 54.0 |
| 1231 | 10v-07-Isocloso — fe2c4 — 872       | -3170.569692 | 54.0 |
| 1232 | 10v-07-Isocloso — fe2c4 — 876       | -3170.569658 | 54.0 |
| 1233 | 10v-07-Isocloso — fe2c4 — 804       | -3170.56965  | 54.0 |
| 1234 | 10v-03-BicapCubC2v — fe2c4 — 372    | -3170.569589 | 54.0 |
| 1235 | 10v-08-BicapSqAntipr — fe2c4 — 1689 | -3170.56939  | 54.2 |
| 1236 | 10v-07-Isocloso — fe2c4 — 800       | -3170.569369 | 54.2 |
| 1237 | 10v-08-BicapSqAntipr — fe2c4 — 1645 | -3170.569362 | 54.2 |
| 1238 | 10v-01-trcTriPri1 — fe2c4 — 46      | -3170.569014 | 54.4 |
| 1239 | 10v-01-trcTriPri1 — fe2c4 — 64      | -3170.569014 | 54.4 |
| 1240 | 10v-01-trcTriPri1 — fe2c4 — 75      | -3170.569014 | 54.4 |
| 1241 | 10v-04-BicapSqAntipr — fe2c4 — 410  | -3170.568919 | 54.5 |
| 1242 | 10v-09-Bisdisph — fe2c4 — 1773      | -3170.568895 | 54.5 |
| 1243 | 10v-04-BicapSqAntipr — fe2c4 — 419  | -3170.568826 | 54.5 |
| 1244 | 10v-07-Isocloso — fe2c4 — 1024      | -3170.568773 | 54.6 |
| 1245 | 10v-07-Isocloso — fe2c4 — 1035      | -3170.568773 | 54.6 |
| 1246 | 10v-07-Isocloso — fe2c4 — 954       | -3170.568773 | 54.6 |
| 1247 | 10v-07-Isocloso — fe2c4 — 976       | -3170.568773 | 54.6 |
| 1248 | 10v-04-BicapSqAntipr — fe2c4 — 409  | -3170.568768 | 54.6 |
| 1249 | 10v-08-BicapSqAntipr — fe2c4 — 1299 | -3170.568761 | 54.6 |
| 1250 | 10v-07-Isocloso — fe2c4 — 918       | -3170.568742 | 54.6 |
| 1251 | 10v-07-Isocloso — fe2c4 — 946       | -3170.568742 | 54.6 |
| 1252 | 10v-09-Bisdisph — fe2c4 — 1912      | -3170.568721 | 54.6 |
| 1253 | 10v-08-BicapSqAntipr — fe2c4 — 1322 | -3170.568689 | 54.6 |
| 1254 | 10v-06-AntiPr — fe2c4 — 735         | -3170.568678 | 54.6 |
| 1255 | 10v-07-Isocloso — fe2c4 — 950       | -3170.568676 | 54.6 |
| 1256 | 10v-06-AntiPr — fe2c4 — 749         | -3170.568665 | 54.6 |
| 1257 | 10v-08-BicapSqAntipr — fe2c4 — 1316 | -3170.568658 | 54.6 |
| 1258 | 10v-06-AntiPr — fe2c4 — 741         | -3170.568657 | 54.6 |
| 1259 | 10v-09-Bisdisph — fe2c4 — 1980      | -3170.56859  | 54.7 |
| 1260 | 10v-09-Bisdisph — fe2c4 — 1832      | -3170.568568 | 54.7 |
| 1261 | 10v-09-Bisdisph — fe2c4 — 1868      | -3170.568568 | 54.7 |
| 1262 | 10v-07-Isocloso — fe2c4 — 885       | -3170.568566 | 54.7 |
| 1263 | 10v-08-BicapSqAntipr — fe2c4 — 1334 | -3170.56855  | 54.7 |
| 1264 | 10v-08-BicapSqAntipr — fe2c4 — 1590 | -3170.568443 | 54.8 |
| 1265 | 10v-08-BicapSqAntipr — fe2c4 — 1620 | -3170.56844  | 54.8 |
| 1266 | 10v-03-BicapCubC2v — fe2c4 — 356    | -3170.568409 | 54.8 |
| 1267 | 10v-03-BicapCubC2v — fe2c4 — 362    | -3170.568407 | 54.8 |
| 1268 | 10v-03-BicapCubC2v — fe2c4 — 368    | -3170.568407 | 54.8 |
| 1269 | 10v-08-BicapSqAntipr — fe2c4 — 1512 | -3170.568398 | 54.8 |
| 1270 | 10v-08-BicapSqAntipr — fe2c4 — 1538 | -3170.568385 | 54.8 |
| 1271 | 10v-08-BicapSqAntipr — fe2c4 — 1526 | -3170.568384 | 54.8 |

|      |                                   |              |      |
|------|-----------------------------------|--------------|------|
| 1272 | 10v-03-BicapCubC2v— fe2c4 —369    | -3170.568365 | 54.8 |
| 1273 | 10v-08-BicapSqAntipr— fe2c4 —1598 | -3170.568293 | 54.9 |
| 1274 | 10v-08-BicapSqAntipr— fe2c4 —1554 | -3170.568285 | 54.9 |
| 1275 | 10v-08-BicapSqAntipr— fe2c4 —1502 | -3170.56828  | 54.9 |
| 1276 | 10v-08-BicapSqAntipr— fe2c4 —1574 | -3170.568277 | 54.9 |
| 1277 | 10v-08-BicapSqAntipr— fe2c4 —1474 | -3170.568274 | 54.9 |
| 1278 | 10v-08-BicapSqAntipr— fe2c4 —1480 | -3170.568273 | 54.9 |
| 1279 | 10v-08-BicapSqAntipr— fe2c4 —1464 | -3170.568269 | 54.9 |
| 1280 | 10v-08-BicapSqAntipr— fe2c4 —1490 | -3170.568267 | 54.9 |
| 1281 | 10v-08-BicapSqAntipr— fe2c4 —1603 | -3170.568258 | 54.9 |
| 1282 | 10v-08-BicapSqAntipr— fe2c4 —1563 | -3170.568256 | 54.9 |
| 1283 | 10v-08-BicapSqAntipr— fe2c4 —1569 | -3170.568255 | 54.9 |
| 1284 | 10v-09-Bisdisph— fe2c4 —1954      | -3170.568189 | 54.9 |
| 1285 | 10v-03-BicapCubC2v— fe2c4 —348    | -3170.568141 | 55.0 |
| 1286 | 10v-03-BicapCubC2v— fe2c4 —351    | -3170.568121 | 55.0 |
| 1287 | 10v-03-BicapCubC2v— fe2c4 —346    | -3170.56812  | 55.0 |
| 1288 | 10v-03-BicapCubC2v— fe2c4 —342    | -3170.568116 | 55.0 |
| 1289 | 10v-07-Isocloso— fe2c4 —801       | -3170.568097 | 55.0 |
| 1290 | 10v-07-Isocloso— fe2c4 —814       | -3170.568076 | 55.0 |
| 1291 | 10v-04-BicapSqAntipr— fe2c4 —421  | -3170.568002 | 55.0 |
| 1292 | 10v-03-BicapCubC2v— fe2c4 —354    | -3170.567959 | 55.1 |
| 1293 | 10v-02-trcTriPri2— fe2c4 —125     | -3170.567914 | 55.1 |
| 1294 | 10v-02-trcTriPri2— fe2c4 —149     | -3170.567914 | 55.1 |
| 1295 | 10v-03-BicapCubC2v— fe2c4 —339    | -3170.567891 | 55.1 |
| 1296 | 10v-04-BicapSqAntipr— fe2c4 —407  | -3170.567844 | 55.1 |
| 1297 | 10v-02-trcTriPri2— fe2c4 —114     | -3170.567812 | 55.2 |
| 1298 | 10v-02-trcTriPri2— fe2c4 —120     | -3170.567812 | 55.2 |
| 1299 | 10v-02-trcTriPri2— fe2c4 —126     | -3170.567812 | 55.2 |
| 1300 | 10v-02-trcTriPri2— fe2c4 —150     | -3170.567812 | 55.2 |
| 1301 | 10v-02-trcTriPri2— fe2c4 —156     | -3170.567812 | 55.2 |
| 1302 | 10v-02-trcTriPri2— fe2c4 —303     | -3170.567543 | 55.3 |
| 1303 | 10v-09-Bisdisph— fe2c4 —1918      | -3170.567503 | 55.4 |
| 1304 | 10v-09-Bisdisph— fe2c4 —1960      | -3170.567503 | 55.4 |
| 1305 | 10v-08-BicapSqAntipr— fe2c4 —1374 | -3170.567466 | 55.4 |
| 1306 | 10v-08-BicapSqAntipr— fe2c4 —1398 | -3170.567462 | 55.4 |
| 1307 | 10v-08-BicapSqAntipr— fe2c4 —1404 | -3170.56746  | 55.4 |
| 1308 | 10v-08-BicapSqAntipr— fe2c4 —1408 | -3170.567448 | 55.4 |
| 1309 | 10v-08-BicapSqAntipr— fe2c4 —1644 | -3170.567445 | 55.4 |
| 1310 | 10v-08-BicapSqAntipr— fe2c4 —1396 | -3170.567443 | 55.4 |
| 1311 | 10v-02-trcTriPri2— fe2c4 —238     | -3170.567411 | 55.4 |
| 1312 | 10v-02-trcTriPri2— fe2c4 —252     | -3170.567411 | 55.4 |
| 1313 | 10v-02-trcTriPri2— fe2c4 —261     | -3170.567411 | 55.4 |
| 1314 | 10v-08-BicapSqAntipr— fe2c4 —1372 | -3170.567406 | 55.4 |
| 1315 | 10v-08-BicapSqAntipr— fe2c4 —1402 | -3170.567328 | 55.5 |
| 1316 | 10v-02-trcTriPri2— fe2c4 —130     | -3170.567316 | 55.5 |
| 1317 | 10v-02-trcTriPri2— fe2c4 —160     | -3170.567316 | 55.5 |
| 1318 | 10v-08-BicapSqAntipr— fe2c4 —1410 | -3170.567312 | 55.5 |
| 1319 | 10v-08-BicapSqAntipr— fe2c4 —1549 | -3170.567301 | 55.5 |
| 1320 | 10v-07-Isocloso— fe2c4 —1146      | -3170.567219 | 55.5 |
| 1321 | 10v-02-trcTriPri2— fe2c4 —145     | -3170.567192 | 55.5 |
| 1322 | 10v-02-trcTriPri2— fe2c4 —165     | -3170.567185 | 55.6 |



|      |                                     |              |      |
|------|-------------------------------------|--------------|------|
| 1323 | 10v-08-BicapSqAntipr — fe2c4 — 1561 | -3170.56716  | 55.6 |
| 1324 | 10v-08-BicapSqAntipr — fe2c4 — 1579 | -3170.567144 | 55.6 |
| 1325 | 10v-07-Isocloso — fe2c4 — 1142      | -3170.567096 | 55.6 |
| 1326 | 10v-07-Isocloso — fe2c4 — 1213      | -3170.567096 | 55.6 |
| 1327 | 10v-08-BicapSqAntipr — fe2c4 — 1436 | -3170.56706  | 55.6 |
| 1328 | 10v-08-BicapSqAntipr — fe2c4 — 1692 | -3170.567003 | 55.7 |
| 1329 | 10v-09-Bisdisph — fe2c4 — 1998      | -3170.56693  | 55.7 |
| 1330 | 10v-08-BicapSqAntipr — fe2c4 — 1458 | -3170.566887 | 55.7 |
| 1331 | 10v-01-trcTriPri1 — fe2c4 — 36      | -3170.566715 | 55.8 |
| 1332 | 10v-01-trcTriPri1 — fe2c4 — 22      | -3170.566694 | 55.9 |
| 1333 | 10v-09-Bisdisph — fe2c4 — 1725      | -3170.566525 | 56.0 |
| 1334 | 10v-09-Bisdisph — fe2c4 — 1787      | -3170.566525 | 56.0 |
| 1335 | 10v-07-Isocloso — fe2c4 — 1223      | -3170.566493 | 56.0 |
| 1336 | 10v-08-BicapSqAntipr — fe2c4 — 1272 | -3170.566485 | 56.0 |
| 1337 | 10v-08-BicapSqAntipr — fe2c4 — 1332 | -3170.566482 | 56.0 |
| 1338 | 10v-08-BicapSqAntipr — fe2c4 — 1296 | -3170.566476 | 56.0 |
| 1339 | 10v-09-Bisdisph — fe2c4 — 1745      | -3170.566475 | 56.0 |
| 1340 | 10v-07-Isocloso — fe2c4 — 1131      | -3170.566463 | 56.0 |
| 1341 | 10v-01-trcTriPri1 — fe2c4 — 10      | -3170.566436 | 56.0 |
| 1342 | 10v-09-Bisdisph — fe2c4 — 1811      | -3170.566408 | 56.0 |
| 1343 | 10v-07-Isocloso — fe2c4 — 1045      | -3170.566357 | 56.1 |
| 1344 | 10v-07-Isocloso — fe2c4 — 1113      | -3170.566357 | 56.1 |
| 1345 | 10v-09-Bisdisph — fe2c4 — 1920      | -3170.566342 | 56.1 |
| 1346 | 10v-09-Bisdisph — fe2c4 — 1986      | -3170.566335 | 56.1 |
| 1347 | 10v-09-Bisdisph — fe2c4 — 1962      | -3170.566329 | 56.1 |
| 1348 | 10v-07-Isocloso — fe2c4 — 828       | -3170.566299 | 56.1 |
| 1349 | 10v-07-Isocloso — fe2c4 — 834       | -3170.566295 | 56.1 |
| 1350 | 10v-07-Isocloso — fe2c4 — 840       | -3170.566295 | 56.1 |
| 1351 | 10v-06-AntiPr — fe2c4 — 731         | -3170.566209 | 56.2 |
| 1352 | 10v-09-Bisdisph — fe2c4 — 1968      | -3170.566147 | 56.2 |
| 1353 | 10v-09-Bisdisph — fe2c4 — 1926      | -3170.566139 | 56.2 |
| 1354 | 10v-07-Isocloso — fe2c4 — 996       | -3170.566127 | 56.2 |
| 1355 | 10v-07-Isocloso — fe2c4 — 960       | -3170.566123 | 56.2 |
| 1356 | 10v-07-Isocloso — fe2c4 — 966       | -3170.566123 | 56.2 |
| 1357 | 10v-07-Isocloso — fe2c4 — 836       | -3170.566061 | 56.3 |
| 1358 | 10v-07-Isocloso — fe2c4 — 844       | -3170.566061 | 56.3 |
| 1359 | 10v-09-Bisdisph — fe2c4 — 1873      | -3170.56606  | 56.3 |
| 1360 | 10v-09-Bisdisph — fe2c4 — 1881      | -3170.566051 | 56.3 |
| 1361 | 10v-08-BicapSqAntipr — fe2c4 — 1339 | -3170.566038 | 56.3 |
| 1362 | 10v-08-BicapSqAntipr — fe2c4 — 1342 | -3170.565967 | 56.3 |
| 1363 | 10v-08-BicapSqAntipr — fe2c4 — 1306 | -3170.565965 | 56.3 |
| 1364 | 10v-08-BicapSqAntipr — fe2c4 — 1312 | -3170.565963 | 56.3 |
| 1365 | 10v-07-Isocloso — fe2c4 — 1199      | -3170.565952 | 56.3 |
| 1366 | 10v-09-Bisdisph — fe2c4 — 1908      | -3170.565806 | 56.4 |
| 1367 | 10v-08-BicapSqAntipr — fe2c4 — 1699 | -3170.565745 | 56.5 |
| 1368 | 10v-08-BicapSqAntipr — fe2c4 — 1492 | -3170.565692 | 56.5 |
| 1369 | 10v-08-BicapSqAntipr — fe2c4 — 1504 | -3170.565691 | 56.5 |
| 1370 | 10v-08-BicapSqAntipr — fe2c4 — 1309 | -3170.565675 | 56.5 |
| 1371 | 10v-08-BicapSqAntipr — fe2c4 — 1707 | -3170.565666 | 56.5 |
| 1372 | 10v-07-Isocloso — fe2c4 — 964       | -3170.565615 | 56.5 |
| 1373 | 10v-03-BicapCubD4h — fe2c4 — 383    | -3170.565611 | 56.5 |

|      |                                     |              |      |
|------|-------------------------------------|--------------|------|
| 1374 | 10v-08-BicapSqAntipr — fe2c4 — 1304 | -3170.565601 | 56.5 |
| 1375 | 10v-08-BicapSqAntipr — fe2c4 — 1275 | -3170.565595 | 56.6 |
| 1376 | 10v-08-BicapSqAntipr — fe2c4 — 1287 | -3170.565592 | 56.6 |
| 1377 | 10v-08-BicapSqAntipr — fe2c4 — 1328 | -3170.565579 | 56.6 |
| 1378 | 10v-08-BicapSqAntipr — fe2c4 — 1636 | -3170.565544 | 56.6 |
| 1379 | 10v-07-Isocloso — fe2c4 — 894       | -3170.565543 | 56.6 |
| 1380 | 10v-09-Bisdisph — fe2c4 — 1875      | -3170.565541 | 56.6 |
| 1381 | 10v-09-Bisdisph — fe2c4 — 1887      | -3170.565541 | 56.6 |
| 1382 | 10v-07-Isocloso — fe2c4 — 962       | -3170.565477 | 56.6 |
| 1383 | 10v-08-BicapSqAntipr — fe2c4 — 1462 | -3170.565449 | 56.6 |
| 1384 | 10v-08-BicapSqAntipr — fe2c4 — 1468 | -3170.565437 | 56.6 |
| 1385 | 10v-08-BicapSqAntipr — fe2c4 — 1336 | -3170.565398 | 56.7 |
| 1386 | 10v-07-Isocloso — fe2c4 — 1010      | -3170.56539  | 56.7 |
| 1387 | 10v-08-BicapSqAntipr — fe2c4 — 1318 | -3170.56539  | 56.7 |
| 1388 | 10v-06-AntiPr — fe2c4 — 765         | -3170.564254 | 57.4 |
| 1389 | 10v-06-AntiPr — fe2c4 — 727         | -3170.564212 | 57.4 |
| 1390 | 10v-07-Isocloso — fe2c4 — 968       | -3170.564127 | 57.5 |
| 1391 | 10v-07-Isocloso — fe2c4 — 973       | -3170.564127 | 57.5 |
| 1392 | 10v-07-Isocloso — fe2c4 — 1019      | -3170.564115 | 57.5 |
| 1393 | 10v-09-Bisdisph — fe2c4 — 1739      | -3170.564041 | 57.5 |
| 1394 | 10v-05-PentagPrism — fe2c4 — 513    | -3170.563983 | 57.6 |
| 1395 | 10v-05-PentagPrism — fe2c4 — 519    | -3170.563983 | 57.6 |
| 1396 | 10v-05-PentagPrism — fe2c4 — 549    | -3170.563983 | 57.6 |
| 1397 | 10v-05-PentagPrism — fe2c4 — 555    | -3170.563983 | 57.6 |
| 1398 | 10v-05-PentagPrism — fe2c4 — 587    | -3170.563983 | 57.6 |
| 1399 | 10v-09-Bisdisph — fe2c4 — 1817      | -3170.563803 | 57.7 |
| 1400 | 10v-02-trcTriPri2 — fe2c4 — 266     | -3170.563802 | 57.7 |
| 1401 | 10v-08-BicapSqAntipr — fe2c4 — 1387 | -3170.563801 | 57.7 |
| 1402 | 10v-02-trcTriPri2 — fe2c4 — 272     | -3170.563659 | 57.8 |
| 1403 | 10v-08-BicapSqAntipr — fe2c4 — 1381 | -3170.563643 | 57.8 |
| 1404 | 10v-08-BicapSqAntipr — fe2c4 — 1377 | -3170.563642 | 57.8 |
| 1405 | 10v-09-Bisdisph — fe2c4 — 1805      | -3170.563595 | 57.8 |
| 1406 | 10v-07-Isocloso — fe2c4 — 1052      | -3170.563537 | 57.8 |
| 1407 | 10v-07-Isocloso — fe2c4 — 1094      | -3170.563533 | 57.8 |
| 1408 | 10v-08-BicapSqAntipr — fe2c4 — 1375 | -3170.563518 | 57.9 |
| 1409 | 10v-07-Isocloso — fe2c4 — 1055      | -3170.563515 | 57.9 |
| 1410 | 10v-08-BicapSqAntipr — fe2c4 — 1352 | -3170.56343  | 57.9 |
| 1411 | 10v-08-BicapSqAntipr — fe2c4 — 1633 | -3170.563328 | 58.0 |
| 1412 | 10v-08-BicapSqAntipr — fe2c4 — 1681 | -3170.56332  | 58.0 |
| 1413 | 10v-07-Isocloso — fe2c4 — 1167      | -3170.563189 | 58.1 |
| 1414 | 10v-07-Isocloso — fe2c4 — 1173      | -3170.563189 | 58.1 |
| 1415 | 10v-07-Isocloso — fe2c4 — 1177      | -3170.563189 | 58.1 |
| 1416 | 10v-01-trcTriPri1 — fe2c4 — 92      | -3170.562842 | 58.3 |
| 1417 | 10v-09-Bisdisph — fe2c4 — 1822      | -3170.562806 | 58.3 |
| 1418 | 10v-09-Bisdisph — fe2c4 — 1798      | -3170.562805 | 58.3 |
| 1419 | 10v-08-BicapSqAntipr — fe2c4 — 1508 | -3170.562792 | 58.3 |
| 1420 | 10v-08-BicapSqAntipr — fe2c4 — 1597 | -3170.562792 | 58.3 |
| 1421 | 10v-08-BicapSqAntipr — fe2c4 — 1573 | -3170.562789 | 58.3 |
| 1422 | 10v-08-BicapSqAntipr — fe2c4 — 1514 | -3170.562785 | 58.3 |
| 1423 | 10v-07-Isocloso — fe2c4 — 1201      | -3170.562777 | 58.3 |
| 1424 | 10v-07-Isocloso — fe2c4 — 1211      | -3170.562776 | 58.3 |

|      |                      |       |      |              |      |
|------|----------------------|-------|------|--------------|------|
| 1425 | 10v-08-BicapSqAntipr | fe2c4 | 1572 | -3170.562755 | 58.3 |
| 1426 | 10v-08-BicapSqAntipr | fe2c4 | 1578 | -3170.562733 | 58.3 |
| 1427 | 10v-07-Isocloso      | fe2c4 | 850  | -3170.562549 | 58.5 |
| 1428 | 10v-07-Isocloso      | fe2c4 | 808  | -3170.562504 | 58.5 |
| 1429 | 10v-07-Isocloso      | fe2c4 | 860  | -3170.562339 | 58.6 |
| 1430 | 10v-07-Isocloso      | fe2c4 | 865  | -3170.562339 | 58.6 |
| 1431 | 10v-07-Isocloso      | fe2c4 | 829  | -3170.562331 | 58.6 |
| 1432 | 10v-04-BicapSqAntipr | fe2c4 | 430  | -3170.562321 | 58.6 |
| 1433 | 10v-04-BicapSqAntipr | fe2c4 | 497  | -3170.562321 | 58.6 |
| 1434 | 10v-07-Isocloso      | fe2c4 | 851  | -3170.562317 | 58.6 |
| 1435 | 10v-07-Isocloso      | fe2c4 | 811  | -3170.56227  | 58.6 |
| 1436 | 10v-07-Isocloso      | fe2c4 | 841  | -3170.56227  | 58.6 |
| 1437 | 10v-07-Isocloso      | fe2c4 | 871  | -3170.56227  | 58.6 |
| 1438 | 10v-07-Isocloso      | fe2c4 | 889  | -3170.562259 | 58.6 |
| 1439 | 10v-07-Isocloso      | fe2c4 | 911  | -3170.562259 | 58.6 |
| 1440 | 10v-07-Isocloso      | fe2c4 | 1001 | -3170.562254 | 58.6 |
| 1441 | 10v-07-Isocloso      | fe2c4 | 989  | -3170.562253 | 58.6 |
| 1442 | 10v-09-Bisdisph      | fe2c4 | 1825 | -3170.562242 | 58.7 |
| 1443 | 10v-09-Bisdisph      | fe2c4 | 1831 | -3170.562242 | 58.7 |
| 1444 | 10v-09-Bisdisph      | fe2c4 | 1843 | -3170.562242 | 58.7 |
| 1445 | 10v-07-Isocloso      | fe2c4 | 928  | -3170.562236 | 58.7 |
| 1446 | 10v-09-Bisdisph      | fe2c4 | 2002 | -3170.562111 | 58.7 |
| 1447 | 10v-09-Bisdisph      | fe2c4 | 1996 | -3170.562107 | 58.7 |
| 1448 | 10v-07-Isocloso      | fe2c4 | 1000 | -3170.562096 | 58.7 |
| 1449 | 10v-07-Isocloso      | fe2c4 | 1084 | -3170.561862 | 58.9 |
| 1450 | 10v-02-trcTriPri2    | fe2c4 | 292  | -3170.561796 | 58.9 |
| 1451 | 10v-07-Isocloso      | fe2c4 | 1097 | -3170.56165  | 59.0 |
| 1452 | 10v-07-Isocloso      | fe2c4 | 1129 | -3170.56165  | 59.0 |
| 1453 | 10v-07-Isocloso      | fe2c4 | 1117 | -3170.56158  | 59.1 |
| 1454 | 10v-08-BicapSqAntipr | fe2c4 | 1614 | -3170.561198 | 59.3 |
| 1455 | 10v-08-BicapSqAntipr | fe2c4 | 1556 | -3170.561175 | 59.3 |
| 1456 | 10v-08-BicapSqAntipr | fe2c4 | 1609 | -3170.561164 | 59.3 |
| 1457 | 10v-08-BicapSqAntipr | fe2c4 | 1586 | -3170.561159 | 59.3 |
| 1458 | 10v-08-BicapSqAntipr | fe2c4 | 1550 | -3170.561156 | 59.3 |
| 1459 | 10v-08-BicapSqAntipr | fe2c4 | 1542 | -3170.561051 | 59.4 |
| 1460 | 10v-08-BicapSqAntipr | fe2c4 | 1530 | -3170.561049 | 59.4 |
| 1461 | 10v-08-BicapSqAntipr | fe2c4 | 1524 | -3170.561042 | 59.4 |
| 1462 | 10v-04-BicapSqAntipr | fe2c4 | 469  | -3170.560961 | 59.5 |
| 1463 | 10v-08-BicapSqAntipr | fe2c4 | 1440 | -3170.560853 | 59.5 |
| 1464 | 10v-08-BicapSqAntipr | fe2c4 | 1438 | -3170.560847 | 59.5 |
| 1465 | 10v-08-BicapSqAntipr | fe2c4 | 1450 | -3170.560839 | 59.5 |
| 1466 | 10v-03-BicapCubC2v   | fe2c4 | 366  | -3170.560814 | 59.6 |
| 1467 | 10v-03-BicapCubC2v   | fe2c4 | 344  | -3170.560774 | 59.6 |
| 1468 | 10v-07-Isocloso      | fe2c4 | 835  | -3170.560694 | 59.6 |
| 1469 | 10v-07-Isocloso      | fe2c4 | 843  | -3170.560694 | 59.6 |
| 1470 | 10v-07-Isocloso      | fe2c4 | 1041 | -3170.560674 | 59.6 |
| 1471 | 10v-07-Isocloso      | fe2c4 | 864  | -3170.560599 | 59.7 |
| 1472 | 10v-07-Isocloso      | fe2c4 | 1039 | -3170.56049  | 59.8 |
| 1473 | 10v-03-BicapCubD4h   | fe2c4 | 382  | -3170.560364 | 59.8 |
| 1474 | 10v-08-BicapSqAntipr | fe2c4 | 1285 | -3170.560169 | 60.0 |
| 1475 | 10v-07-Isocloso      | fe2c4 | 1208 | -3170.560164 | 60.0 |

|      |                                     |              |      |
|------|-------------------------------------|--------------|------|
| 1476 | 10v-07-Isocloso — fe2c4 — 994       | -3170.560056 | 60.0 |
| 1477 | 10v-07-Isocloso — fe2c4 — 958       | -3170.560054 | 60.0 |
| 1478 | 10v-08-BicapSqAntipr — fe2c4 — 1324 | -3170.560031 | 60.0 |
| 1479 | 10v-08-BicapSqAntipr — fe2c4 — 1330 | -3170.56003  | 60.0 |
| 1480 | 10v-03-BicapCubD4h — fe2c4 — 377    | -3170.559397 | 60.4 |
| 1481 | 10v-01-trcTriPri1 — fe2c4 — 101     | -3170.55925  | 60.5 |
| 1482 | 10v-01-trcTriPri1 — fe2c4 — 40      | -3170.55925  | 60.5 |
| 1483 | 10v-01-trcTriPri1 — fe2c4 — 57      | -3170.55925  | 60.5 |
| 1484 | 10v-03-BicapCubC2v — fe2c4 — 343    | -3170.559109 | 60.6 |
| 1485 | 10v-03-BicapCubC2v — fe2c4 — 361    | -3170.558956 | 60.7 |
| 1486 | 10v-03-BicapCubC2v — fe2c4 — 367    | -3170.558956 | 60.7 |
| 1487 | 10v-09-Bisdisph — fe2c4 — 1780      | -3170.558077 | 61.3 |
| 1488 | 10v-09-Bisdisph — fe2c4 — 1788      | -3170.558064 | 61.3 |
| 1489 | 10v-01-trcTriPri1 — fe2c4 — 48      | -3170.558017 | 61.3 |
| 1490 | 10v-01-trcTriPri1 — fe2c4 — 60      | -3170.558017 | 61.3 |
| 1491 | 10v-07-Isocloso — fe2c4 — 1205      | -3170.558014 | 61.3 |
| 1492 | 10v-09-Bisdisph — fe2c4 — 1916      | -3170.557998 | 61.3 |
| 1493 | 10v-09-Bisdisph — fe2c4 — 1992      | -3170.557994 | 61.3 |
| 1494 | 10v-09-Bisdisph — fe2c4 — 1958      | -3170.557905 | 61.4 |
| 1495 | 10v-08-BicapSqAntipr — fe2c4 — 1583 | -3170.557034 | 61.9 |
| 1496 | 10v-08-BicapSqAntipr — fe2c4 — 1515 | -3170.557033 | 61.9 |
| 1497 | 10v-08-BicapSqAntipr — fe2c4 — 1546 | -3170.556984 | 62.0 |
| 1498 | 10v-07-Isocloso — fe2c4 — 1110      | -3170.556965 | 62.0 |
| 1499 | 10v-08-BicapSqAntipr — fe2c4 — 1527 | -3170.556935 | 62.0 |
| 1500 | 10v-03-BicapCubC2v — fe2c4 — 340    | -3170.556793 | 62.1 |
| 1501 | 10v-07-Isocloso — fe2c4 — 854       | -3170.5567   | 62.1 |
| 1502 | 10v-07-Isocloso — fe2c4 — 818       | -3170.556697 | 62.1 |
| 1503 | 10v-07-Isocloso — fe2c4 — 852       | -3170.556667 | 62.2 |
| 1504 | 10v-07-Isocloso — fe2c4 — 866       | -3170.556665 | 62.2 |
| 1505 | 10v-08-BicapSqAntipr — fe2c4 — 1687 | -3170.556646 | 62.2 |
| 1506 | 10v-08-BicapSqAntipr — fe2c4 — 1711 | -3170.556474 | 62.3 |
| 1507 | 10v-07-Isocloso — fe2c4 — 781       | -3170.556359 | 62.3 |
| 1508 | 10v-05-PentagPrism — fe2c4 — 625    | -3170.556184 | 62.5 |
| 1509 | 10v-05-PentagPrism — fe2c4 — 633    | -3170.556184 | 62.5 |
| 1510 | 10v-08-BicapSqAntipr — fe2c4 — 1558 | -3170.556027 | 62.6 |
| 1511 | 10v-03-BicapCubD4h — fe2c4 — 393    | -3170.555997 | 62.6 |
| 1512 | 10v-08-BicapSqAntipr — fe2c4 — 1599 | -3170.555995 | 62.6 |
| 1513 | 10v-08-BicapSqAntipr — fe2c4 — 1516 | -3170.555976 | 62.6 |
| 1514 | 10v-09-Bisdisph — fe2c4 — 1883      | -3170.555935 | 62.6 |
| 1515 | 10v-08-BicapSqAntipr — fe2c4 — 1706 | -3170.555899 | 62.6 |
| 1516 | 10v-08-BicapSqAntipr — fe2c4 — 1716 | -3170.555869 | 62.7 |
| 1517 | 10v-07-Isocloso — fe2c4 — 995       | -3170.555808 | 62.7 |
| 1518 | 10v-07-Isocloso — fe2c4 — 959       | -3170.555802 | 62.7 |
| 1519 | 10v-08-BicapSqAntipr — fe2c4 — 1682 | -3170.555772 | 62.7 |
| 1520 | 10v-06-AntiPr — fe2c4 — 707         | -3170.555711 | 62.8 |
| 1521 | 10v-08-BicapSqAntipr — fe2c4 — 1437 | -3170.55571  | 62.8 |
| 1522 | 10v-10-DistTcapOh — fe2c4 — 2039    | -3170.555685 | 62.8 |
| 1523 | 10v-03-BicapCubC2v — fe2c4 — 345    | -3170.555631 | 62.8 |
| 1524 | 10v-10-DistTcapOh — fe2c4 — 2006    | -3170.555616 | 62.8 |
| 1525 | 10v-10-DistTcapOh — fe2c4 — 2013    | -3170.555611 | 62.8 |
| 1526 | 10v-08-BicapSqAntipr — fe2c4 — 1449 | -3170.555609 | 62.8 |

|      |                                 |              |      |
|------|---------------------------------|--------------|------|
| 1527 | 10v-03-BicapCubC2v—fe2c4—316    | -3170.555602 | 62.8 |
| 1528 | 10v-09-Bisdisph—fe2c4—1865      | -3170.555598 | 62.8 |
| 1529 | 10v-10-DistTcapOh—fe2c4—2012    | -3170.555586 | 62.8 |
| 1530 | 10v-03-BicapCubC2v—fe2c4—352    | -3170.555553 | 62.9 |
| 1531 | 10v-10-DistTcapOh—fe2c4—2034    | -3170.555511 | 62.9 |
| 1532 | 10v-10-DistTcapOh—fe2c4—2027    | -3170.555508 | 62.9 |
| 1533 | 10v-06-AntiPr—fe2c4—720         | -3170.555495 | 62.9 |
| 1534 | 10v-06-AntiPr—fe2c4—726         | -3170.555495 | 62.9 |
| 1535 | 10v-10-DistTcapOh—fe2c4—2005    | -3170.555492 | 62.9 |
| 1536 | 10v-06-AntiPr—fe2c4—708         | -3170.555482 | 62.9 |
| 1537 | 10v-10-DistTcapOh—fe2c4—2018    | -3170.555482 | 62.9 |
| 1538 | 10v-10-DistTcapOh—fe2c4—2019    | -3170.555482 | 62.9 |
| 1539 | 10v-06-AntiPr—fe2c4—712         | -3170.555451 | 62.9 |
| 1540 | 10v-06-AntiPr—fe2c4—723         | -3170.555444 | 62.9 |
| 1541 | 10v-03-BicapCubC2v—fe2c4—318    | -3170.555346 | 63.0 |
| 1542 | 10v-09-Bisdisph—fe2c4—1909      | -3170.55468  | 63.4 |
| 1543 | 10v-01-trcTriPri1—fe2c4—49      | -3170.554503 | 63.5 |
| 1544 | 10v-03-BicapCubC2v—fe2c4—341    | -3170.554469 | 63.5 |
| 1545 | 10v-03-BicapCubC2v—fe2c4—315    | -3170.554413 | 63.6 |
| 1546 | 10v-02-trcTriPri2—fe2c4—151     | -3170.554339 | 63.6 |
| 1547 | 10v-02-trcTriPri2—fe2c4—104     | -3170.554323 | 63.6 |
| 1548 | 10v-02-trcTriPri2—fe2c4—115     | -3170.554323 | 63.6 |
| 1549 | 10v-08-BicapSqAntipr—fe2c4—1690 | -3170.554241 | 63.7 |
| 1550 | 10v-02-trcTriPri2—fe2c4—185     | -3170.554227 | 63.7 |
| 1551 | 10v-02-trcTriPri2—fe2c4—184     | -3170.554121 | 63.8 |
| 1552 | 10v-08-BicapSqAntipr—fe2c4—1646 | -3170.553843 | 63.9 |
| 1553 | 10v-08-BicapSqAntipr—fe2c4—1439 | -3170.55343  | 64.2 |
| 1554 | 10v-08-BicapSqAntipr—fe2c4—1413 | -3170.553428 | 64.2 |
| 1555 | 10v-07-Isocloso—fe2c4—1083      | -3170.553362 | 64.2 |
| 1556 | 10v-09-Bisdisph—fe2c4—1877      | -3170.553272 | 64.3 |
| 1557 | 10v-07-Isocloso—fe2c4—1081      | -3170.553184 | 64.3 |
| 1558 | 10v-07-Isocloso—fe2c4—807       | -3170.553124 | 64.4 |
| 1559 | 10v-08-BicapSqAntipr—fe2c4—1702 | -3170.553116 | 64.4 |
| 1560 | 10v-08-BicapSqAntipr—fe2c4—1696 | -3170.55309  | 64.4 |
| 1561 | 10v-02-trcTriPri2—fe2c4—198     | -3170.552958 | 64.5 |
| 1562 | 10v-08-BicapSqAntipr—fe2c4—1672 | -3170.552936 | 64.5 |
| 1563 | 10v-08-BicapSqAntipr—fe2c4—1284 | -3170.552898 | 64.5 |
| 1564 | 10v-08-BicapSqAntipr—fe2c4—1308 | -3170.552898 | 64.5 |
| 1565 | 10v-08-BicapSqAntipr—fe2c4—1242 | -3170.552896 | 64.5 |
| 1566 | 10v-08-BicapSqAntipr—fe2c4—1278 | -3170.552896 | 64.5 |
| 1567 | 10v-08-BicapSqAntipr—fe2c4—1248 | -3170.552895 | 64.5 |
| 1568 | 10v-08-BicapSqAntipr—fe2c4—1254 | -3170.552889 | 64.5 |
| 1569 | 10v-08-BicapSqAntipr—fe2c4—1595 | -3170.552385 | 64.8 |
| 1570 | 10v-09-Bisdisph—fe2c4—1994      | -3170.552234 | 64.9 |
| 1571 | 10v-09-Bisdisph—fe2c4—1988      | -3170.552233 | 64.9 |
| 1572 | 10v-07-Isocloso—fe2c4—863       | -3170.5522   | 65.0 |
| 1573 | 10v-07-Isocloso—fe2c4—869       | -3170.5522   | 65.0 |
| 1574 | 10v-03-BicapCubC2v—fe2c4—353    | -3170.552058 | 65.0 |
| 1575 | 10v-03-BicapCubC2v—fe2c4—310    | -3170.552029 | 65.1 |
| 1576 | 10v-08-BicapSqAntipr—fe2c4—1441 | -3170.551649 | 65.3 |
| 1577 | 10v-08-BicapSqAntipr—fe2c4—1453 | -3170.551647 | 65.3 |

|      |                      |       |      |              |      |
|------|----------------------|-------|------|--------------|------|
| 1578 | 10v-08-BicapSqAntipr | fe2c4 | 1562 | -3170.550947 | 65.7 |
| 1579 | 10v-08-BicapSqAntipr | fe2c4 | 1580 | -3170.550942 | 65.7 |
| 1580 | 10v-04-BicapSqAntipr | fe2c4 | 495  | -3170.550878 | 65.8 |
| 1581 | 10v-04-BicapSqAntipr | fe2c4 | 475  | -3170.55081  | 65.8 |
| 1582 | 10v-03-BicapCubC2v   | fe2c4 | 330  | -3170.550774 | 65.9 |
| 1583 | 10v-08-BicapSqAntipr | fe2c4 | 1528 | -3170.550747 | 65.9 |
| 1584 | 10v-08-BicapSqAntipr | fe2c4 | 1540 | -3170.550741 | 65.9 |
| 1585 | 10v-08-BicapSqAntipr | fe2c4 | 1536 | -3170.55071  | 65.9 |
| 1586 | 10v-04-BicapSqAntipr | fe2c4 | 482  | -3170.550139 | 66.2 |
| 1587 | 10v-04-BicapSqAntipr | fe2c4 | 500  | -3170.550139 | 66.2 |
| 1588 | 10v-05-PentagPrism   | fe2c4 | 506  | -3170.54993  | 66.4 |
| 1589 | 10v-05-PentagPrism   | fe2c4 | 535  | -3170.54993  | 66.4 |
| 1590 | 10v-05-PentagPrism   | fe2c4 | 571  | -3170.54993  | 66.4 |
| 1591 | 10v-08-BicapSqAntipr | fe2c4 | 1616 | -3170.549344 | 66.7 |
| 1592 | 10v-08-BicapSqAntipr | fe2c4 | 1665 | -3170.549289 | 66.8 |
| 1593 | 10v-07-Isocloso      | fe2c4 | 799  | -3170.549285 | 66.8 |
| 1594 | 10v-07-Isocloso      | fe2c4 | 812  | -3170.549279 | 66.8 |
| 1595 | 10v-07-Isocloso      | fe2c4 | 842  | -3170.549279 | 66.8 |
| 1596 | 10v-04-BicapSqAntipr | fe2c4 | 502  | -3170.549257 | 66.8 |
| 1597 | 10v-04-BicapSqAntipr | fe2c4 | 504  | -3170.549088 | 66.9 |
| 1598 | 10v-07-Isocloso      | fe2c4 | 777  | -3170.548943 | 67.0 |
| 1599 | 10v-07-Isocloso      | fe2c4 | 795  | -3170.54894  | 67.0 |
| 1600 | 10v-08-BicapSqAntipr | fe2c4 | 1657 | -3170.548937 | 67.0 |
| 1601 | 10v-02-trcTriPri2    | fe2c4 | 302  | -3170.548914 | 67.0 |
| 1602 | 10v-02-trcTriPri2    | fe2c4 | 296  | -3170.548913 | 67.0 |
| 1603 | 10v-07-Isocloso      | fe2c4 | 837  | -3170.548896 | 67.0 |
| 1604 | 10v-04-BicapSqAntipr | fe2c4 | 442  | -3170.548882 | 67.0 |
| 1605 | 10v-04-BicapSqAntipr | fe2c4 | 448  | -3170.548882 | 67.0 |
| 1606 | 10v-05-PentagPrism   | fe2c4 | 660  | -3170.548861 | 67.1 |
| 1607 | 10v-05-PentagPrism   | fe2c4 | 566  | -3170.548857 | 67.1 |
| 1608 | 10v-05-PentagPrism   | fe2c4 | 572  | -3170.548857 | 67.1 |
| 1609 | 10v-04-BicapSqAntipr | fe2c4 | 483  | -3170.548072 | 67.5 |
| 1610 | 10v-04-BicapSqAntipr | fe2c4 | 493  | -3170.548072 | 67.5 |
| 1611 | 10v-07-Isocloso      | fe2c4 | 1106 | -3170.548003 | 67.6 |
| 1612 | 10v-07-Isocloso      | fe2c4 | 1085 | -3170.547957 | 67.6 |
| 1613 | 10v-07-Isocloso      | fe2c4 | 1119 | -3170.547902 | 67.7 |
| 1614 | 10v-02-trcTriPri2    | fe2c4 | 216  | -3170.547841 | 67.7 |
| 1615 | 10v-02-trcTriPri2    | fe2c4 | 258  | -3170.547841 | 67.7 |
| 1616 | 10v-02-trcTriPri2    | fe2c4 | 264  | -3170.547841 | 67.7 |
| 1617 | 10v-07-Isocloso      | fe2c4 | 1096 | -3170.547716 | 67.8 |
| 1618 | 10v-02-trcTriPri2    | fe2c4 | 105  | -3170.5466   | 68.5 |
| 1619 | 10v-02-trcTriPri2    | fe2c4 | 111  | -3170.5466   | 68.5 |
| 1620 | 10v-02-trcTriPri2    | fe2c4 | 137  | -3170.5466   | 68.5 |
| 1621 | 10v-02-trcTriPri2    | fe2c4 | 173  | -3170.5466   | 68.5 |
| 1622 | 10v-07-Isocloso      | fe2c4 | 783  | -3170.546445 | 68.6 |
| 1623 | 10v-02-trcTriPri2    | fe2c4 | 124  | -3170.546438 | 68.6 |
| 1624 | 10v-02-trcTriPri2    | fe2c4 | 136  | -3170.546438 | 68.6 |
| 1625 | 10v-02-trcTriPri2    | fe2c4 | 148  | -3170.546438 | 68.6 |
| 1626 | 10v-02-trcTriPri2    | fe2c4 | 172  | -3170.546438 | 68.6 |
| 1627 | 10v-02-trcTriPri2    | fe2c4 | 147  | -3170.546377 | 68.6 |
| 1628 | 10v-02-trcTriPri2    | fe2c4 | 171  | -3170.546374 | 68.6 |

|      |                                 |              |      |
|------|---------------------------------|--------------|------|
| 1629 | 10v-02-trcTriPri2—fe2c4—123     | -3170.546348 | 68.6 |
| 1630 | 10v-02-trcTriPri2—fe2c4—135     | -3170.546348 | 68.6 |
| 1631 | 10v-08-BicapSqAntipr—fe2c4—1700 | -3170.546165 | 68.7 |
| 1632 | 10v-10-DistTcapOh—fe2c4—2037    | -3170.546164 | 68.7 |
| 1633 | 10v-08-BicapSqAntipr—fe2c4—1684 | -3170.546134 | 68.8 |
| 1634 | 10v-10-DistTcapOh—fe2c4—2040    | -3170.546119 | 68.8 |
| 1635 | 10v-07-Isocloso—fe2c4—909       | -3170.546115 | 68.8 |
| 1636 | 10v-07-Isocloso—fe2c4—925       | -3170.546115 | 68.8 |
| 1637 | 10v-09-Bisdisph—fe2c4—1866      | -3170.546104 | 68.8 |
| 1638 | 10v-09-Bisdisph—fe2c4—1836      | -3170.546092 | 68.8 |
| 1639 | 10v-09-Bisdisph—fe2c4—1872      | -3170.546092 | 68.8 |
| 1640 | 10v-08-BicapSqAntipr—fe2c4—1281 | -3170.546082 | 68.8 |
| 1641 | 10v-07-Isocloso—fe2c4—916       | -3170.54607  | 68.8 |
| 1642 | 10v-08-BicapSqAntipr—fe2c4—1708 | -3170.546032 | 68.8 |
| 1643 | 10v-09-Bisdisph—fe2c4—1880      | -3170.546021 | 68.8 |
| 1644 | 10v-10-DistTcapOh—fe2c4—2031    | -3170.54598  | 68.9 |
| 1645 | 10v-07-Isocloso—fe2c4—914       | -3170.545919 | 68.9 |
| 1646 | 10v-03-BicapCubD4h—fe2c4—387    | -3170.54591  | 68.9 |
| 1647 | 10v-04-BicapSqAntipr—fe2c4—451  | -3170.545822 | 69.0 |
| 1648 | 10v-04-BicapSqAntipr—fe2c4—473  | -3170.545818 | 69.0 |
| 1649 | 10v-04-BicapSqAntipr—fe2c4—439  | -3170.545817 | 69.0 |
| 1650 | 10v-03-BicapCubD4h—fe2c4—380    | -3170.54578  | 69.0 |
| 1651 | 10v-06-AntiPr—fe2c4—661         | -3170.545588 | 69.1 |
| 1652 | 10v-07-Isocloso—fe2c4—775       | -3170.545418 | 69.2 |
| 1653 | 10v-07-Isocloso—fe2c4—784       | -3170.545272 | 69.3 |
| 1654 | 10v-07-Isocloso—fe2c4—793       | -3170.545128 | 69.4 |
| 1655 | 10v-04-BicapSqAntipr—fe2c4—503  | -3170.545009 | 69.5 |
| 1656 | 10v-07-Isocloso—fe2c4—980       | -3170.543956 | 70.1 |
| 1657 | 10v-10-DistTcapOh—fe2c4—2017    | -3170.543955 | 70.1 |
| 1658 | 10v-10-DistTcapOh—fe2c4—2020    | -3170.543955 | 70.1 |
| 1659 | 10v-10-DistTcapOh—fe2c4—2014    | -3170.543951 | 70.1 |
| 1660 | 10v-10-DistTcapOh—fe2c4—2007    | -3170.543948 | 70.1 |
| 1661 | 10v-07-Isocloso—fe2c4—991       | -3170.543942 | 70.1 |
| 1662 | 10v-10-DistTcapOh—fe2c4—2033    | -3170.543918 | 70.2 |
| 1663 | 10v-10-DistTcapOh—fe2c4—2010    | -3170.543882 | 70.2 |
| 1664 | 10v-10-DistTcapOh—fe2c4—2022    | -3170.543875 | 70.2 |
| 1665 | 10v-10-DistTcapOh—fe2c4—2016    | -3170.543873 | 70.2 |
| 1666 | 10v-07-Isocloso—fe2c4—929       | -3170.543838 | 70.2 |
| 1667 | 10v-02-trcTriPri2—fe2c4—107     | -3170.543823 | 70.2 |
| 1668 | 10v-02-trcTriPri2—fe2c4—113     | -3170.543823 | 70.2 |
| 1669 | 10v-10-DistTcapOh—fe2c4—2011    | -3170.543811 | 70.2 |
| 1670 | 10v-10-DistTcapOh—fe2c4—2008    | -3170.54381  | 70.2 |
| 1671 | 10v-06-AntiPr—fe2c4—705         | -3170.543641 | 70.3 |
| 1672 | 10v-07-Isocloso—fe2c4—1076      | -3170.543579 | 70.4 |
| 1673 | 10v-07-Isocloso—fe2c4—1116      | -3170.543579 | 70.4 |
| 1674 | 10v-02-trcTriPri2—fe2c4—175     | -3170.5431   | 70.7 |
| 1675 | 10v-08-BicapSqAntipr—fe2c4—1457 | -3170.543083 | 70.7 |
| 1676 | 10v-02-trcTriPri2—fe2c4—196     | -3170.543005 | 70.7 |
| 1677 | 10v-07-Isocloso—fe2c4—922       | -3170.542908 | 70.8 |
| 1678 | 10v-08-BicapSqAntipr—fe2c4—1674 | -3170.542835 | 70.8 |
| 1679 | 10v-08-BicapSqAntipr—fe2c4—1698 | -3170.542835 | 70.8 |

|      |                                     |              |      |
|------|-------------------------------------|--------------|------|
| 1680 | 10v-08-BicapSqAntipr — fe2c4 — 1650 | -3170.542834 | 70.8 |
| 1681 | 10v-08-BicapSqAntipr — fe2c4 — 1654 | -3170.54283  | 70.8 |
| 1682 | 10v-08-BicapSqAntipr — fe2c4 — 1678 | -3170.542819 | 70.8 |
| 1683 | 10v-09-Bisdisph — fe2c4 — 1886      | -3170.542816 | 70.8 |
| 1684 | 10v-09-Bisdisph — fe2c4 — 1892      | -3170.542816 | 70.8 |
| 1685 | 10v-08-BicapSqAntipr — fe2c4 — 1660 | -3170.542815 | 70.8 |
| 1686 | 10v-02-trcTriPri2 — fe2c4 — 132     | -3170.542811 | 70.8 |
| 1687 | 10v-02-trcTriPri2 — fe2c4 — 162     | -3170.542811 | 70.8 |
| 1688 | 10v-02-trcTriPri2 — fe2c4 — 186     | -3170.542811 | 70.8 |
| 1689 | 10v-08-BicapSqAntipr — fe2c4 — 1596 | -3170.542805 | 70.9 |
| 1690 | 10v-08-BicapSqAntipr — fe2c4 — 1602 | -3170.542778 | 70.9 |
| 1691 | 10v-07-Isocloso — fe2c4 — 913       | -3170.54275  | 70.9 |
| 1692 | 10v-08-BicapSqAntipr — fe2c4 — 1591 | -3170.542612 | 71.0 |
| 1693 | 10v-08-BicapSqAntipr — fe2c4 — 1567 | -3170.542605 | 71.0 |
| 1694 | 10v-08-BicapSqAntipr — fe2c4 — 1551 | -3170.542604 | 71.0 |
| 1695 | 10v-08-BicapSqAntipr — fe2c4 — 1648 | -3170.542585 | 71.0 |
| 1696 | 10v-03-BicapCubC2v — fe2c4 — 359    | -3170.542524 | 71.0 |
| 1697 | 10v-03-BicapCubC2v — fe2c4 — 308    | -3170.542322 | 71.2 |
| 1698 | 10v-07-Isocloso — fe2c4 — 1022      | -3170.542103 | 71.3 |
| 1699 | 10v-07-Isocloso — fe2c4 — 1033      | -3170.542103 | 71.3 |
| 1700 | 10v-07-Isocloso — fe2c4 — 974       | -3170.542103 | 71.3 |
| 1701 | 10v-07-Isocloso — fe2c4 — 984       | -3170.542103 | 71.3 |
| 1702 | 10v-08-BicapSqAntipr — fe2c4 — 1566 | -3170.542055 | 71.3 |
| 1703 | 10v-09-Bisdisph — fe2c4 — 1894      | -3170.542032 | 71.3 |
| 1704 | 10v-01-trcTriPri1 — fe2c4 — 47      | -3170.542027 | 71.3 |
| 1705 | 10v-01-trcTriPri1 — fe2c4 — 77      | -3170.542027 | 71.3 |
| 1706 | 10v-09-Bisdisph — fe2c4 — 1856      | -3170.541978 | 71.4 |
| 1707 | 10v-09-Bisdisph — fe2c4 — 1896      | -3170.541978 | 71.4 |
| 1708 | 10v-10-DistTcapOh — fe2c4 — 2030    | -3170.541957 | 71.4 |
| 1709 | 10v-10-DistTcapOh — fe2c4 — 2026    | -3170.541951 | 71.4 |
| 1710 | 10v-10-DistTcapOh — fe2c4 — 2044    | -3170.541919 | 71.4 |
| 1711 | 10v-09-Bisdisph — fe2c4 — 2000      | -3170.541779 | 71.5 |
| 1712 | 10v-09-Bisdisph — fe2c4 — 1878      | -3170.541765 | 71.5 |
| 1713 | 10v-01-trcTriPri1 — fe2c4 — 17      | -3170.540969 | 72.0 |
| 1714 | 10v-08-BicapSqAntipr — fe2c4 — 1455 | -3170.540459 | 72.3 |
| 1715 | 10v-08-BicapSqAntipr — fe2c4 — 1445 | -3170.540443 | 72.3 |
| 1716 | 10v-08-BicapSqAntipr — fe2c4 — 1471 | -3170.540441 | 72.3 |
| 1717 | 10v-08-BicapSqAntipr — fe2c4 — 1411 | -3170.540431 | 72.3 |
| 1718 | 10v-08-BicapSqAntipr — fe2c4 — 1423 | -3170.540428 | 72.3 |
| 1719 | 10v-05-PentagPrism — fe2c4 — 655    | -3170.540034 | 72.6 |
| 1720 | 10v-05-PentagPrism — fe2c4 — 639    | -3170.540029 | 72.6 |
| 1721 | 10v-05-PentagPrism — fe2c4 — 643    | -3170.540029 | 72.6 |
| 1722 | 10v-09-Bisdisph — fe2c4 — 1844      | -3170.53992  | 72.7 |
| 1723 | 10v-09-Bisdisph — fe2c4 — 1850      | -3170.53992  | 72.7 |
| 1724 | 10v-10-DistTcapOh — fe2c4 — 2050    | -3170.53989  | 72.7 |
| 1725 | 10v-06-AntiPr — fe2c4 — 676         | -3170.539825 | 72.7 |
| 1726 | 10v-06-AntiPr — fe2c4 — 702         | -3170.539824 | 72.7 |
| 1727 | 10v-06-AntiPr — fe2c4 — 682         | -3170.539822 | 72.7 |
| 1728 | 10v-10-DistTcapOh — fe2c4 — 2024    | -3170.539813 | 72.7 |
| 1729 | 10v-09-Bisdisph — fe2c4 — 1890      | -3170.539678 | 72.8 |
| 1730 | 10v-08-BicapSqAntipr — fe2c4 — 1594 | -3170.539402 | 73.0 |



|      |                                 |              |      |
|------|---------------------------------|--------------|------|
| 1731 | 10v-08-BicapSqAntipr—fe2c4—1582 | -3170.53935  | 73.0 |
| 1732 | 10v-09-Bisdisph—fe2c4—1849      | -3170.539297 | 73.1 |
| 1733 | 10v-09-Bisdisph—fe2c4—1867      | -3170.539297 | 73.1 |
| 1734 | 10v-09-Bisdisph—fe2c4—1826      | -3170.539296 | 73.1 |
| 1735 | 10v-07-Isocloso—fe2c4—1025      | -3170.539281 | 73.1 |
| 1736 | 10v-07-Isocloso—fe2c4—1031      | -3170.539281 | 73.1 |
| 1737 | 10v-07-Isocloso—fe2c4—1037      | -3170.539281 | 73.1 |
| 1738 | 10v-07-Isocloso—fe2c4—971       | -3170.539281 | 73.1 |
| 1739 | 10v-07-Isocloso—fe2c4—977       | -3170.539281 | 73.1 |
| 1740 | 10v-08-BicapSqAntipr—fe2c4—1587 | -3170.53915  | 73.1 |
| 1741 | 10v-07-Isocloso—fe2c4—1043      | -3170.53909  | 73.2 |
| 1742 | 10v-07-Isocloso—fe2c4—1065      | -3170.539066 | 73.2 |
| 1743 | 10v-07-Isocloso—fe2c4—1047      | -3170.53902  | 73.2 |
| 1744 | 10v-04-BicapSqAntipr—fe2c4—445  | -3170.539019 | 73.2 |
| 1745 | 10v-04-BicapSqAntipr—fe2c4—463  | -3170.539019 | 73.2 |
| 1746 | 10v-04-BicapSqAntipr—fe2c4—485  | -3170.539019 | 73.2 |
| 1747 | 10v-06-AntiPr—fe2c4—700         | -3170.539014 | 73.2 |
| 1748 | 10v-06-AntiPr—fe2c4—672         | -3170.539011 | 73.2 |
| 1749 | 10v-06-AntiPr—fe2c4—694         | -3170.539007 | 73.2 |
| 1750 | 10v-01-trcTriPri1—fe2c4—53      | -3170.538957 | 73.3 |
| 1751 | 10v-08-BicapSqAntipr—fe2c4—1405 | -3170.538932 | 73.3 |
| 1752 | 10v-08-BicapSqAntipr—fe2c4—1356 | -3170.538921 | 73.3 |
| 1753 | 10v-09-Bisdisph—fe2c4—1950      | -3170.538165 | 73.8 |
| 1754 | 10v-09-Bisdisph—fe2c4—1944      | -3170.537906 | 73.9 |
| 1755 | 10v-09-Bisdisph—fe2c4—1932      | -3170.537733 | 74.0 |
| 1756 | 10v-02-trcTriPri2—fe2c4—293     | -3170.537602 | 74.1 |
| 1757 | 10v-06-AntiPr—fe2c4—688         | -3170.537562 | 74.1 |
| 1758 | 10v-06-AntiPr—fe2c4—675         | -3170.537531 | 74.2 |
| 1759 | 10v-04-BicapSqAntipr—fe2c4—432  | -3170.537464 | 74.2 |
| 1760 | 10v-02-trcTriPri2—fe2c4—201     | -3170.537276 | 74.3 |
| 1761 | 10v-02-trcTriPri2—fe2c4—209     | -3170.537276 | 74.3 |
| 1762 | 10v-02-trcTriPri2—fe2c4—227     | -3170.537276 | 74.3 |
| 1763 | 10v-02-trcTriPri2—fe2c4—251     | -3170.537276 | 74.3 |
| 1764 | 10v-04-BicapSqAntipr—fe2c4—433  | -3170.537274 | 74.3 |
| 1765 | 10v-04-BicapSqAntipr—fe2c4—479  | -3170.537273 | 74.3 |
| 1766 | 10v-04-BicapSqAntipr—fe2c4—427  | -3170.53727  | 74.3 |
| 1767 | 10v-04-BicapSqAntipr—fe2c4—457  | -3170.53727  | 74.3 |
| 1768 | 10v-03-BicapCubC2v—fe2c4—322    | -3170.537247 | 74.3 |
| 1769 | 10v-01-trcTriPri1—fe2c4—58      | -3170.536907 | 74.6 |
| 1770 | 10v-01-trcTriPri1—fe2c4—66      | -3170.536907 | 74.6 |
| 1771 | 10v-08-BicapSqAntipr—fe2c4—1498 | -3170.536505 | 74.8 |
| 1772 | 10v-08-BicapSqAntipr—fe2c4—1486 | -3170.536466 | 74.8 |
| 1773 | 10v-07-Isocloso—fe2c4—1075      | -3170.536033 | 75.1 |
| 1774 | 10v-07-Isocloso—fe2c4—1108      | -3170.535862 | 75.2 |
| 1775 | 10v-07-Isocloso—fe2c4—1109      | -3170.535843 | 75.2 |
| 1776 | 10v-10-DistTcapOh—fe2c4—2043    | -3170.535573 | 75.4 |
| 1777 | 10v-10-DistTcapOh—fe2c4—2046    | -3170.53548  | 75.4 |
| 1778 | 10v-10-DistTcapOh—fe2c4—2038    | -3170.534634 | 76.0 |
| 1779 | 10v-10-DistTcapOh—fe2c4—2032    | -3170.534618 | 76.0 |
| 1780 | 10v-09-Bisdisph—fe2c4—1884      | -3170.534602 | 76.0 |
| 1781 | 10v-08-BicapSqAntipr—fe2c4—1664 | -3170.534563 | 76.0 |

|      |                      |       |      |              |      |
|------|----------------------|-------|------|--------------|------|
| 1782 | 10v-04-BicapSqAntipr | fe2c4 | 428  | -3170.534535 | 76.0 |
| 1783 | 10v-07-Isocloso      | fe2c4 | 910  | -3170.53453  | 76.0 |
| 1784 | 10v-07-Isocloso      | fe2c4 | 926  | -3170.53453  | 76.0 |
| 1785 | 10v-04-BicapSqAntipr | fe2c4 | 443  | -3170.534509 | 76.1 |
| 1786 | 10v-04-BicapSqAntipr | fe2c4 | 455  | -3170.534509 | 76.1 |
| 1787 | 10v-09-Bisdisph      | fe2c4 | 1848 | -3170.534473 | 76.1 |
| 1788 | 10v-09-Bisdisph      | fe2c4 | 1854 | -3170.534473 | 76.1 |
| 1789 | 10v-09-Bisdisph      | fe2c4 | 1860 | -3170.534473 | 76.1 |
| 1790 | 10v-08-BicapSqAntipr | fe2c4 | 1714 | -3170.534124 | 76.3 |
| 1791 | 10v-03-BicapCubC2v   | fe2c4 | 338  | -3170.533451 | 76.7 |
| 1792 | 10v-08-BicapSqAntipr | fe2c4 | 1605 | -3170.533105 | 76.9 |
| 1793 | 10v-08-BicapSqAntipr | fe2c4 | 1552 | -3170.533036 | 77.0 |
| 1794 | 10v-08-BicapSqAntipr | fe2c4 | 1568 | -3170.533035 | 77.0 |
| 1795 | 10v-08-BicapSqAntipr | fe2c4 | 1592 | -3170.533032 | 77.0 |
| 1796 | 10v-06-AntiPr        | fe2c4 | 711  | -3170.532927 | 77.1 |
| 1797 | 10v-06-AntiPr        | fe2c4 | 717  | -3170.532894 | 77.1 |
| 1798 | 10v-08-BicapSqAntipr | fe2c4 | 1518 | -3170.532797 | 77.1 |
| 1799 | 10v-02-trcTriPri2    | fe2c4 | 234  | -3170.532422 | 77.4 |
| 1800 | 10v-02-trcTriPri2    | fe2c4 | 240  | -3170.532422 | 77.4 |
| 1801 | 10v-07-Isocloso      | fe2c4 | 1073 | -3170.532291 | 77.4 |
| 1802 | 10v-08-BicapSqAntipr | fe2c4 | 1406 | -3170.532269 | 77.5 |
| 1803 | 10v-07-Isocloso      | fe2c4 | 1049 | -3170.532251 | 77.5 |
| 1804 | 10v-08-BicapSqAntipr | fe2c4 | 1652 | -3170.532215 | 77.5 |
| 1805 | 10v-08-BicapSqAntipr | fe2c4 | 1676 | -3170.532205 | 77.5 |
| 1806 | 10v-08-BicapSqAntipr | fe2c4 | 1658 | -3170.532202 | 77.5 |
| 1807 | 10v-08-BicapSqAntipr | fe2c4 | 1710 | -3170.532189 | 77.5 |
| 1808 | 10v-08-BicapSqAntipr | fe2c4 | 1386 | -3170.532172 | 77.5 |
| 1809 | 10v-08-BicapSqAntipr | fe2c4 | 1368 | -3170.53217  | 77.5 |
| 1810 | 10v-08-BicapSqAntipr | fe2c4 | 1666 | -3170.532078 | 77.6 |
| 1811 | 10v-08-BicapSqAntipr | fe2c4 | 1425 | -3170.532068 | 77.6 |
| 1812 | 10v-08-BicapSqAntipr | fe2c4 | 1463 | -3170.532068 | 77.6 |
| 1813 | 10v-08-BicapSqAntipr | fe2c4 | 1473 | -3170.532067 | 77.6 |
| 1814 | 10v-08-BicapSqAntipr | fe2c4 | 1429 | -3170.532064 | 77.6 |
| 1815 | 10v-08-BicapSqAntipr | fe2c4 | 1431 | -3170.532053 | 77.6 |
| 1816 | 10v-08-BicapSqAntipr | fe2c4 | 1501 | -3170.532052 | 77.6 |
| 1817 | 10v-08-BicapSqAntipr | fe2c4 | 1503 | -3170.532051 | 77.6 |
| 1818 | 10v-09-Bisdisph      | fe2c4 | 1993 | -3170.532042 | 77.6 |
| 1819 | 10v-09-Bisdisph      | fe2c4 | 1987 | -3170.53204  | 77.6 |
| 1820 | 10v-02-trcTriPri2    | fe2c4 | 153  | -3170.532012 | 77.6 |
| 1821 | 10v-07-Isocloso      | fe2c4 | 769  | -3170.531967 | 77.7 |
| 1822 | 10v-02-trcTriPri2    | fe2c4 | 178  | -3170.531965 | 77.7 |
| 1823 | 10v-02-trcTriPri2    | fe2c4 | 119  | -3170.531909 | 77.7 |
| 1824 | 10v-02-trcTriPri2    | fe2c4 | 155  | -3170.531909 | 77.7 |
| 1825 | 10v-03-BicapCubC2v   | fe2c4 | 337  | -3170.531895 | 77.7 |
| 1826 | 10v-08-BicapSqAntipr | fe2c4 | 1557 | -3170.531872 | 77.7 |
| 1827 | 10v-02-trcTriPri2    | fe2c4 | 108  | -3170.531869 | 77.7 |
| 1828 | 10v-08-BicapSqAntipr | fe2c4 | 1600 | -3170.531569 | 77.9 |
| 1829 | 10v-08-BicapSqAntipr | fe2c4 | 1584 | -3170.531568 | 77.9 |
| 1830 | 10v-05-PentagPrism   | fe2c4 | 649  | -3170.529641 | 79.1 |
| 1831 | 10v-05-PentagPrism   | fe2c4 | 524  | -3170.529628 | 79.1 |
| 1832 | 10v-05-PentagPrism   | fe2c4 | 542  | -3170.529628 | 79.1 |

|      |                                     |              |      |
|------|-------------------------------------|--------------|------|
| 1833 | 10v-07-Isocloso — fe2c4 — 816       | -3170.528988 | 79.5 |
| 1834 | 10v-08-BicapSqAntipr — fe2c4 — 1638 | -3170.528714 | 79.7 |
| 1835 | 10v-09-Bisdisph — fe2c4 — 1978      | -3170.528619 | 79.8 |
| 1836 | 10v-09-Bisdisph — fe2c4 — 1972      | -3170.528559 | 79.8 |
| 1837 | 10v-09-Bisdisph — fe2c4 — 1984      | -3170.528541 | 79.8 |
| 1838 | 10v-08-BicapSqAntipr — fe2c4 — 1634 | -3170.528507 | 79.8 |
| 1839 | 10v-07-Isocloso — fe2c4 — 817       | -3170.528364 | 79.9 |
| 1840 | 10v-07-Isocloso — fe2c4 — 824       | -3170.528364 | 79.9 |
| 1841 | 10v-07-Isocloso — fe2c4 — 830       | -3170.528364 | 79.9 |
| 1842 | 10v-07-Isocloso — fe2c4 — 846       | -3170.528364 | 79.9 |
| 1843 | 10v-05-PentagPrism — fe2c4 — 546    | -3170.528145 | 80.1 |
| 1844 | 10v-05-PentagPrism — fe2c4 — 530    | -3170.528082 | 80.1 |
| 1845 | 10v-05-PentagPrism — fe2c4 — 536    | -3170.528082 | 80.1 |
| 1846 | 10v-05-PentagPrism — fe2c4 — 659    | -3170.527947 | 80.2 |
| 1847 | 10v-07-Isocloso — fe2c4 — 1050      | -3170.527074 | 80.7 |
| 1848 | 10v-07-Isocloso — fe2c4 — 1080      | -3170.527073 | 80.7 |
| 1849 | 10v-07-Isocloso — fe2c4 — 1046      | -3170.526954 | 80.8 |
| 1850 | 10v-07-Isocloso — fe2c4 — 1114      | -3170.526954 | 80.8 |
| 1851 | 10v-09-Bisdisph — fe2c4 — 1969      | -3170.525163 | 81.9 |
| 1852 | 10v-01-trcTriPri1 — fe2c4 — 43      | -3170.52505  | 82.0 |
| 1853 | 10v-01-trcTriPri1 — fe2c4 — 51      | -3170.52505  | 82.0 |
| 1854 | 10v-01-trcTriPri1 — fe2c4 — 71      | -3170.52505  | 82.0 |
| 1855 | 10v-01-trcTriPri1 — fe2c4 — 72      | -3170.52469  | 82.2 |
| 1856 | 10v-04-BicapSqAntipr — fe2c4 — 471  | -3170.524538 | 82.3 |
| 1857 | 10v-08-BicapSqAntipr — fe2c4 — 1612 | -3170.524531 | 82.3 |
| 1858 | 10v-08-BicapSqAntipr — fe2c4 — 1606 | -3170.524507 | 82.3 |
| 1859 | 10v-04-BicapSqAntipr — fe2c4 — 440  | -3170.52439  | 82.4 |
| 1860 | 10v-04-BicapSqAntipr — fe2c4 — 477  | -3170.524388 | 82.4 |
| 1861 | 10v-07-Isocloso — fe2c4 — 806       | -3170.52421  | 82.5 |
| 1862 | 10v-07-Isocloso — fe2c4 — 848       | -3170.524159 | 82.6 |
| 1863 | 10v-08-BicapSqAntipr — fe2c4 — 1604 | -3170.523239 | 83.1 |
| 1864 | 10v-08-BicapSqAntipr — fe2c4 — 1570 | -3170.523237 | 83.1 |
| 1865 | 10v-08-BicapSqAntipr — fe2c4 — 1427 | -3170.523039 | 83.3 |
| 1866 | 10v-08-BicapSqAntipr — fe2c4 — 1475 | -3170.52303  | 83.3 |
| 1867 | 10v-08-BicapSqAntipr — fe2c4 — 1481 | -3170.52303  | 83.3 |
| 1868 | 10v-08-BicapSqAntipr — fe2c4 — 1495 | -3170.523022 | 83.3 |
| 1869 | 10v-09-Bisdisph — fe2c4 — 1750      | -3170.522856 | 83.4 |
| 1870 | 10v-09-Bisdisph — fe2c4 — 1911      | -3170.521993 | 83.9 |
| 1871 | 10v-06-AntiPr — fe2c4 — 667         | -3170.521094 | 84.5 |
| 1872 | 10v-06-AntiPr — fe2c4 — 683         | -3170.521061 | 84.5 |
| 1873 | 10v-06-AntiPr — fe2c4 — 689         | -3170.521053 | 84.5 |
| 1874 | 10v-06-AntiPr — fe2c4 — 677         | -3170.521049 | 84.5 |
| 1875 | 10v-03-BicapCubD4h — fe2c4 — 389    | -3170.52094  | 84.6 |
| 1876 | 10v-08-BicapSqAntipr — fe2c4 — 1443 | -3170.520769 | 84.7 |
| 1877 | 10v-01-trcTriPri1 — fe2c4 — 32      | -3170.520755 | 84.7 |
| 1878 | 10v-06-AntiPr — fe2c4 — 698         | -3170.520686 | 84.7 |
| 1879 | 10v-08-BicapSqAntipr — fe2c4 — 1447 | -3170.520456 | 84.9 |
| 1880 | 10v-08-BicapSqAntipr — fe2c4 — 1465 | -3170.52031  | 85.0 |
| 1881 | 10v-10-DistTcapOh — fe2c4 — 2045    | -3170.5203   | 85.0 |
| 1882 | 10v-02-trcTriPri2 — fe2c4 — 106     | -3170.51997  | 85.2 |
| 1883 | 10v-02-trcTriPri2 — fe2c4 — 117     | -3170.51997  | 85.2 |

|      |                                 |              |      |
|------|---------------------------------|--------------|------|
| 1884 | 10v-02-trcTriPri2—fe2c4—179     | -3170.51997  | 85.2 |
| 1885 | 10v-06-AntiPr—fe2c4—767         | -3170.519938 | 85.2 |
| 1886 | 10v-06-AntiPr—fe2c4—739         | -3170.519927 | 85.2 |
| 1887 | 10v-08-BicapSqAntipr—fe2c4—1686 | -3170.519773 | 85.3 |
| 1888 | 10v-08-BicapSqAntipr—fe2c4—1668 | -3170.519704 | 85.3 |
| 1889 | 10v-07-Isocloso—fe2c4—771       | -3170.51969  | 85.4 |
| 1890 | 10v-04-BicapSqAntipr—fe2c4—470  | -3170.519099 | 85.7 |
| 1891 | 10v-08-BicapSqAntipr—fe2c4—1663 | -3170.518432 | 86.1 |
| 1892 | 10v-01-trcTriPri1—fe2c4—23      | -3170.517456 | 86.8 |
| 1893 | 10v-01-trcTriPri1—fe2c4—11      | -3170.517453 | 86.8 |
| 1894 | 10v-07-Isocloso—fe2c4—849       | -3170.517384 | 86.8 |
| 1895 | 10v-09-Bisdisph—fe2c4—1976      | -3170.517104 | 87.0 |
| 1896 | 10v-08-BicapSqAntipr—fe2c4—1593 | -3170.516689 | 87.2 |
| 1897 | 10v-08-BicapSqAntipr—fe2c4—1581 | -3170.516638 | 87.3 |
| 1898 | 10v-08-BicapSqAntipr—fe2c4—1588 | -3170.516363 | 87.4 |
| 1899 | 10v-04-BicapSqAntipr—fe2c4—436  | -3170.515886 | 87.7 |
| 1900 | 10v-04-BicapSqAntipr—fe2c4—450  | -3170.515886 | 87.7 |
| 1901 | 10v-04-BicapSqAntipr—fe2c4—489  | -3170.515886 | 87.7 |
| 1902 | 10v-07-Isocloso—fe2c4—785       | -3170.515776 | 87.8 |
| 1903 | 10v-07-Isocloso—fe2c4—862       | -3170.515721 | 87.8 |
| 1904 | 10v-07-Isocloso—fe2c4—867       | -3170.515721 | 87.8 |
| 1905 | 10v-07-Isocloso—fe2c4—831       | -3170.515713 | 87.9 |
| 1906 | 10v-04-BicapSqAntipr—fe2c4—434  | -3170.515648 | 87.9 |
| 1907 | 10v-04-BicapSqAntipr—fe2c4—487  | -3170.515648 | 87.9 |
| 1908 | 10v-04-BicapSqAntipr—fe2c4—438  | -3170.515392 | 88.1 |
| 1909 | 10v-04-BicapSqAntipr—fe2c4—444  | -3170.515392 | 88.1 |
| 1910 | 10v-08-BicapSqAntipr—fe2c4—1418 | -3170.514051 | 88.9 |
| 1911 | 10v-08-BicapSqAntipr—fe2c4—1483 | -3170.514051 | 88.9 |
| 1912 | 10v-08-BicapSqAntipr—fe2c4—1428 | -3170.514043 | 88.9 |
| 1913 | 10v-08-BicapSqAntipr—fe2c4—1485 | -3170.513682 | 89.1 |
| 1914 | 10v-08-BicapSqAntipr—fe2c4—1420 | -3170.513678 | 89.1 |
| 1915 | 10v-09-Bisdisph—fe2c4—1975      | -3170.513607 | 89.2 |
| 1916 | 10v-08-BicapSqAntipr—fe2c4—1412 | -3170.513397 | 89.3 |
| 1917 | 10v-08-BicapSqAntipr—fe2c4—1477 | -3170.513382 | 89.3 |
| 1918 | 10v-08-BicapSqAntipr—fe2c4—1424 | -3170.513363 | 89.3 |
| 1919 | 10v-06-AntiPr—fe2c4—679         | -3170.513214 | 89.4 |
| 1920 | 10v-06-AntiPr—fe2c4—665         | -3170.513213 | 89.4 |
| 1921 | 10v-06-AntiPr—fe2c4—685         | -3170.513213 | 89.4 |
| 1922 | 10v-10-DistTcapOh—fe2c4—2041    | -3170.513198 | 89.4 |
| 1923 | 10v-10-DistTcapOh—fe2c4—2047    | -3170.513164 | 89.5 |
| 1924 | 10v-10-DistTcapOh—fe2c4—2035    | -3170.513162 | 89.5 |
| 1925 | 10v-09-Bisdisph—fe2c4—1874      | -3170.513062 | 89.5 |
| 1926 | 10v-09-Bisdisph—fe2c4—1882      | -3170.513062 | 89.5 |
| 1927 | 10v-10-DistTcapOh—fe2c4—2036    | -3170.513001 | 89.6 |
| 1928 | 10v-10-DistTcapOh—fe2c4—2042    | -3170.51296  | 89.6 |
| 1929 | 10v-10-DistTcapOh—fe2c4—2048    | -3170.51294  | 89.6 |
| 1930 | 10v-08-BicapSqAntipr—fe2c4—1608 | -3170.512755 | 89.7 |
| 1931 | 10v-08-BicapSqAntipr—fe2c4—1585 | -3170.512556 | 89.8 |
| 1932 | 10v-08-BicapSqAntipr—fe2c4—1555 | -3170.512529 | 89.9 |
| 1933 | 10v-08-BicapSqAntipr—fe2c4—1662 | -3170.511598 | 90.4 |
| 1934 | 10v-08-BicapSqAntipr—fe2c4—1656 | -3170.51154  | 90.5 |

|      |                                     |              |      |
|------|-------------------------------------|--------------|------|
| 1935 | 10v-08-BicapSqAntipr — fe2c4 — 1704 | -3170.511462 | 90.5 |
| 1936 | 10v-02-trcTriPri2 — fe2c4 — 177     | -3170.511379 | 90.6 |
| 1937 | 10v-08-BicapSqAntipr — fe2c4 — 1680 | -3170.51136  | 90.6 |
| 1938 | 10v-02-trcTriPri2 — fe2c4 — 112     | -3170.511318 | 90.6 |
| 1939 | 10v-02-trcTriPri2 — fe2c4 — 118     | -3170.511318 | 90.6 |
| 1940 | 10v-02-trcTriPri2 — fe2c4 — 138     | -3170.511318 | 90.6 |
| 1941 | 10v-02-trcTriPri2 — fe2c4 — 154     | -3170.511318 | 90.6 |
| 1942 | 10v-02-trcTriPri2 — fe2c4 — 174     | -3170.511318 | 90.6 |
| 1943 | 10v-02-trcTriPri2 — fe2c4 — 180     | -3170.511318 | 90.6 |
| 1944 | 10v-09-Bisdisph — fe2c4 — 1934      | -3170.511188 | 90.7 |
| 1945 | 10v-09-Bisdisph — fe2c4 — 1951      | -3170.511188 | 90.7 |
| 1946 | 10v-08-BicapSqAntipr — fe2c4 — 1456 | -3170.508905 | 92.1 |
| 1947 | 10v-08-BicapSqAntipr — fe2c4 — 1432 | -3170.507628 | 92.9 |
| 1948 | 10v-08-BicapSqAntipr — fe2c4 — 1469 | -3170.507471 | 93.0 |
| 1949 | 10v-08-BicapSqAntipr — fe2c4 — 1417 | -3170.507469 | 93.0 |
| 1950 | 10v-08-BicapSqAntipr — fe2c4 — 1491 | -3170.507187 | 93.2 |
| 1951 | 10v-07-Isocloso — fe2c4 — 1095      | -3170.506501 | 93.6 |
| 1952 | 10v-08-BicapSqAntipr — fe2c4 — 1433 | -3170.506235 | 93.8 |
| 1953 | 10v-08-BicapSqAntipr — fe2c4 — 1505 | -3170.506231 | 93.8 |
| 1954 | 10v-04-BicapSqAntipr — fe2c4 — 496  | -3170.506034 | 93.9 |
| 1955 | 10v-08-BicapSqAntipr — fe2c4 — 1493 | -3170.506029 | 93.9 |
| 1956 | 10v-04-BicapSqAntipr — fe2c4 — 476  | -3170.505931 | 94.0 |
| 1957 | 10v-08-BicapSqAntipr — fe2c4 — 1705 | -3170.505915 | 94.0 |
| 1958 | 10v-04-BicapSqAntipr — fe2c4 — 484  | -3170.505715 | 94.1 |
| 1959 | 10v-04-BicapSqAntipr — fe2c4 — 494  | -3170.505715 | 94.1 |
| 1960 | 10v-09-Bisdisph — fe2c4 — 1953      | -3170.504459 | 94.9 |
| 1961 | 10v-09-Bisdisph — fe2c4 — 1942      | -3170.504458 | 94.9 |
| 1962 | 10v-09-Bisdisph — fe2c4 — 1936      | -3170.504457 | 94.9 |
| 1963 | 10v-09-Bisdisph — fe2c4 — 1959      | -3170.503928 | 95.2 |
| 1964 | 10v-08-BicapSqAntipr — fe2c4 — 1419 | -3170.503417 | 95.6 |
| 1965 | 10v-08-BicapSqAntipr — fe2c4 — 1426 | -3170.503349 | 95.6 |
| 1966 | 10v-08-BicapSqAntipr — fe2c4 — 1430 | -3170.50334  | 95.6 |
| 1967 | 10v-08-BicapSqAntipr — fe2c4 — 1479 | -3170.503336 | 95.6 |
| 1968 | 10v-08-BicapSqAntipr — fe2c4 — 1489 | -3170.503258 | 95.7 |
| 1969 | 10v-09-Bisdisph — fe2c4 — 1786      | -3170.50233  | 96.3 |
| 1970 | 10v-02-trcTriPri2 — fe2c4 — 305     | -3170.501727 | 96.6 |
| 1971 | 10v-04-BicapSqAntipr — fe2c4 — 460  | -3170.500995 | 97.1 |
| 1972 | 10v-04-BicapSqAntipr — fe2c4 — 468  | -3170.500995 | 97.1 |
| 1973 | 10v-04-BicapSqAntipr — fe2c4 — 490  | -3170.500995 | 97.1 |
| 1974 | 10v-04-BicapSqAntipr — fe2c4 — 498  | -3170.500995 | 97.1 |
| 1975 | 10v-08-BicapSqAntipr — fe2c4 — 1414 | -3170.500913 | 97.1 |
| 1976 | 10v-07-Isocloso — fe2c4 — 770       | -3170.50071  | 97.3 |
| 1977 | 10v-04-BicapSqAntipr — fe2c4 — 464  | -3170.500511 | 97.4 |
| 1978 | 10v-04-BicapSqAntipr — fe2c4 — 486  | -3170.500511 | 97.4 |
| 1979 | 10v-08-BicapSqAntipr — fe2c4 — 1640 | -3170.500511 | 97.4 |
| 1980 | 10v-01-trcTriPri1 — fe2c4 — 6       | -3170.500045 | 97.7 |
| 1981 | 10v-08-BicapSqAntipr — fe2c4 — 1416 | -3170.499937 | 97.8 |
| 1982 | 10v-03-BicapCubC2v — fe2c4 — 323    | -3170.499225 | 98.2 |
| 1983 | 10v-08-BicapSqAntipr — fe2c4 — 1454 | -3170.498578 | 98.6 |
| 1984 | 10v-08-BicapSqAntipr — fe2c4 — 1451 | -3170.497967 | 99.0 |
| 1985 | 10v-01-trcTriPri1 — fe2c4 — 27      | -3170.497951 | 99.0 |

|      |                                     |              |       |
|------|-------------------------------------|--------------|-------|
| 1986 | 10v-09-Bisdisph — fe2c4 — 1940      | -3170.497941 | 99.0  |
| 1987 | 10v-09-Bisdisph — fe2c4 — 1957      | -3170.497941 | 99.0  |
| 1988 | 10v-08-BicapSqAntipr — fe2c4 — 1448 | -3170.497542 | 99.3  |
| 1989 | 10v-08-BicapSqAntipr — fe2c4 — 1452 | -3170.496058 | 100.2 |
| 1990 | 10v-04-BicapSqAntipr — fe2c4 — 424  | -3170.495453 | 100.6 |
| 1991 | 10v-06-AntiPr — fe2c4 — 695         | -3170.494844 | 100.9 |
| 1992 | 10v-06-AntiPr — fe2c4 — 715         | -3170.494843 | 100.9 |
| 1993 | 10v-06-AntiPr — fe2c4 — 709         | -3170.49484  | 101.0 |
| 1994 | 10v-08-BicapSqAntipr — fe2c4 — 1494 | -3170.49418  | 101.4 |
| 1995 | 10v-08-BicapSqAntipr — fe2c4 — 1500 | -3170.494166 | 101.4 |
| 1996 | 10v-01-trcTriPri1 — fe2c4 — 5       | -3170.494136 | 101.4 |
| 1997 | 10v-08-BicapSqAntipr — fe2c4 — 1506 | -3170.494065 | 101.4 |
| 1998 | 10v-08-BicapSqAntipr — fe2c4 — 1488 | -3170.494062 | 101.4 |
| 1999 | 10v-08-BicapSqAntipr — fe2c4 — 1422 | -3170.493759 | 101.6 |
| 2000 | 10v-08-BicapSqAntipr — fe2c4 — 1434 | -3170.493757 | 101.6 |
| 2001 | 10v-08-BicapSqAntipr — fe2c4 — 1421 | -3170.493654 | 101.7 |
| 2002 | 10v-08-BicapSqAntipr — fe2c4 — 1487 | -3170.493621 | 101.7 |
| 2003 | 10v-08-BicapSqAntipr — fe2c4 — 1499 | -3170.493616 | 101.7 |
| 2004 | 10v-08-BicapSqAntipr — fe2c4 — 1461 | -3170.492744 | 102.3 |
| 2005 | 10v-08-BicapSqAntipr — fe2c4 — 1467 | -3170.492736 | 102.3 |
| 2006 | 10v-07-Isocloso — fe2c4 — 773       | -3170.492679 | 102.3 |
| 2007 | 10v-08-BicapSqAntipr — fe2c4 — 1713 | -3170.492583 | 102.4 |
| 2008 | 10v-07-Isocloso — fe2c4 — 1105      | -3170.492045 | 102.7 |
| 2009 | 10v-08-BicapSqAntipr — fe2c4 — 1497 | -3170.487497 | 105.6 |
| 2010 | 10v-03-BicapCubD4h — fe2c4 — 398    | -3170.487304 | 105.7 |
| 2011 | 10v-08-BicapSqAntipr — fe2c4 — 1478 | -3170.487054 | 105.8 |
| 2012 | 10v-08-BicapSqAntipr — fe2c4 — 1472 | -3170.487053 | 105.8 |
| 2013 | 10v-08-BicapSqAntipr — fe2c4 — 1446 | -3170.48705  | 105.8 |
| 2014 | 10v-08-BicapSqAntipr — fe2c4 — 1466 | -3170.484232 | 107.6 |
| 2015 | 10v-08-BicapSqAntipr — fe2c4 — 1444 | -3170.484215 | 107.6 |
| 2016 | 10v-03-BicapCubC2v — fe2c4 — 313    | -3170.483372 | 108.1 |
| 2017 | 10v-07-Isocloso — fe2c4 — 847       | -3170.482928 | 108.4 |
| 2018 | 10v-07-Isocloso — fe2c4 — 805       | -3170.482853 | 108.5 |
| 2019 | 10v-08-BicapSqAntipr — fe2c4 — 1415 | -3170.481994 | 109.0 |
| 2020 | 10v-01-trcTriPri1 — fe2c4 — 35      | -3170.480237 | 110.1 |
| 2021 | 10v-01-trcTriPri1 — fe2c4 — 3       | -3170.480235 | 110.1 |
| 2022 | 10v-01-trcTriPri1 — fe2c4 — 9       | -3170.480234 | 110.1 |
| 2023 | 10v-01-trcTriPri1 — fe2c4 — 1       | -3170.480223 | 110.1 |
| 2024 | 10v-01-trcTriPri1 — fe2c4 — 29      | -3170.480223 | 110.1 |
| 2025 | 10v-01-trcTriPri1 — fe2c4 — 7       | -3170.480146 | 110.2 |
| 2026 | 10v-04-BicapSqAntipr — fe2c4 — 458  | -3170.477998 | 111.5 |
| 2027 | 10v-04-BicapSqAntipr — fe2c4 — 480  | -3170.477998 | 111.5 |
| 2028 | 10v-04-BicapSqAntipr — fe2c4 — 488  | -3170.477998 | 111.5 |
| 2029 | 10v-04-BicapSqAntipr — fe2c4 — 456  | -3170.477741 | 111.7 |
| 2030 | 10v-04-BicapSqAntipr — fe2c4 — 462  | -3170.477741 | 111.7 |
| 2031 | 10v-04-BicapSqAntipr — fe2c4 — 492  | -3170.477741 | 111.7 |
| 2032 | 10v-07-Isocloso — fe2c4 — 772       | -3170.474583 | 113.7 |
| 2033 | 10v-01-trcTriPri1 — fe2c4 — 13      | -3170.46598  | 119.1 |
| 2034 | 10v-03-BicapCubC2v — fe2c4 — 329    | -3170.465307 | 119.5 |
| 2035 | 10v-03-BicapCubC2v — fe2c4 — 319    | -3170.465253 | 119.5 |
| 2036 | 10v-04-BicapSqAntipr — fe2c4 — 431  | -3170.463108 | 120.9 |

|      |                                |              |       |
|------|--------------------------------|--------------|-------|
| 2037 | 10v-04-BicapSqAntipr—fe2c4—437 | -3170.463108 | 120.9 |
| 2038 | 10v-04-BicapSqAntipr—fe2c4—461 | -3170.463108 | 120.9 |
| 2039 | 10v-04-BicapSqAntipr—fe2c4—491 | -3170.463108 | 120.9 |
| 2040 | 10v-06-AntiPr—fe2c4—733        | -3170.456566 | 125.0 |
| 2041 | 10v-06-AntiPr—fe2c4—713        | -3170.453626 | 126.8 |
| 2042 | 10v-06-AntiPr—fe2c4—719        | -3170.453625 | 126.8 |
| 2043 | 10v-06-AntiPr—fe2c4—725        | -3170.453624 | 126.8 |
| 2044 | 10v-03-BicapCubC2v—fe2c4—312   | -3170.451832 | 127.9 |
| 2045 | 10v-03-BicapCubC2v—fe2c4—309   | -3170.451718 | 128.0 |
| 2046 | 10v-03-BicapCubC2v—fe2c4—347   | -3170.451705 | 128.0 |
| 2047 | 10v-03-BicapCubC2v—fe2c4—317   | -3170.451677 | 128.0 |
| 2048 | 10v-06-AntiPr—fe2c4—740        | -3170.45067  | 128.7 |
| 2049 | 10v-06-AntiPr—fe2c4—758        | -3170.45067  | 128.7 |
| 2050 | 10v-06-AntiPr—fe2c4—768        | -3170.45067  | 128.7 |
| 2051 | 10v-01-trcTriPri1—fe2c4—21     | -3170.423014 | 146.0 |
| 2052 | 10v-01-trcTriPri1—fe2c4—4      | -3170.423014 | 146.0 |

Table S2A: Distance table for the lowest-lying  $\text{Cp}_2\text{Fe}_2\text{C}_4\text{B}_5\text{H}_9$  optimized structures obtained at the PBE0/def2-TZVP level of theory. Included are the zero-point corrected absolute energies in (a.u.), relative energies in (kcal/mol), symmetry and wiberg bond indecies. The cyclopentadienyl ligands and hydrogens are omitted for clarity.

|                                                                                                                                                           |          |          |          |          |          |          |
|-----------------------------------------------------------------------------------------------------------------------------------------------------------|----------|----------|----------|----------|----------|----------|
| 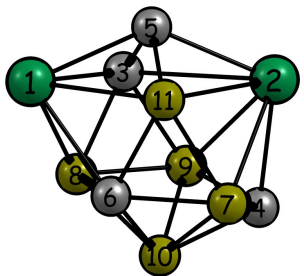 <p>1. -3195.384326 0.0 <math>C_1</math></p> <p>WBI: Fe1-Fe2: 0.0900</p> | 1        | 2        | 3        | 4        | 5        |          |
|                                                                                                                                                           | 1 Fe     | 0.000000 |          |          |          |          |
|                                                                                                                                                           | 2 Fe     | 3.645387 | 0.000000 |          |          |          |
|                                                                                                                                                           | 3 C      | 2.104975 | 2.376378 | 0.000000 |          |          |
|                                                                                                                                                           | 4 C      | 4.001390 | 1.938969 | 2.837644 | 0.000000 |          |
|                                                                                                                                                           | 5 C      | 1.975362 | 1.994069 | 1.463146 | 3.187018 | 0.000000 |
|                                                                                                                                                           | 6 C      | 2.054727 | 3.094300 | 2.590280 | 2.608073 | 2.609028 |
|                                                                                                                                                           | 7 B      | 3.400231 | 2.198295 | 3.108150 | 1.575420 | 2.885578 |
|                                                                                                                                                           | 8 B      | 2.048678 | 3.277124 | 1.664193 | 2.725160 | 2.626797 |
|                                                                                                                                                           | 9 B      | 3.390381 | 2.313187 | 1.760749 | 1.569738 | 2.781269 |
|                                                                                                                                                           | 10 B     | 3.322964 | 3.083230 | 2.807857 | 1.627190 | 3.406401 |
|                                                                                                                                                           | 11 B     | 2.117843 | 2.247353 | 2.495832 | 2.897878 | 1.574084 |
|                                                                                                                                                           | 6 C      | 0.000000 |          |          |          |          |
|                                                                                                                                                           | 7 B      | 1.712149 | 0.000000 |          |          |          |
|                                                                                                                                                           | 8 B      | 1.727860 | 2.816165 | 0.000000 |          |          |
| 9 B                                                                                                                                                       | 2.695836 | 2.616610 | 1.801537 | 0.000000 |          |          |
| 10 B                                                                                                                                                      | 1.674219 | 1.806657 | 1.749114 | 1.807126 | 0.000000 |          |
| 11 B                                                                                                                                                      | 1.697919 | 1.845881 | 2.747917 | 3.145653 | 2.898747 |          |
| 11 B                                                                                                                                                      | 0.000000 |          |          |          |          |          |

|                                                                                                                                                              |          |          |          |          |          |          |
|--------------------------------------------------------------------------------------------------------------------------------------------------------------|----------|----------|----------|----------|----------|----------|
| 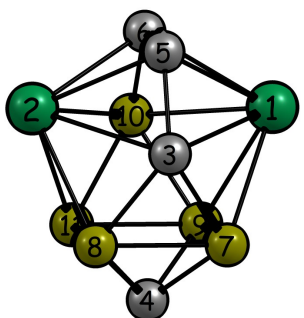 <p>2. -3195.384111 +0.1 <math>C_s</math></p> <p>WBI: Fe1-Fe2: 0.1123</p> | 1        | 2        | 3        | 4        | 5        |          |
|                                                                                                                                                              | 1 Fe     | 0.000000 |          |          |          |          |
|                                                                                                                                                              | 2 Fe     | 3.364431 | 0.000000 |          |          |          |
|                                                                                                                                                              | 3 C      | 2.207850 | 2.205385 | 0.000000 |          |          |
|                                                                                                                                                              | 4 C      | 3.167747 | 3.168156 | 2.647540 | 0.000000 |          |
|                                                                                                                                                              | 5 C      | 2.035301 | 2.034667 | 1.471187 | 3.653405 | 0.000000 |
|                                                                                                                                                              | 6 C      | 2.056084 | 2.056169 | 2.480935 | 3.700917 | 1.414995 |
|                                                                                                                                                              | 7 B      | 2.125090 | 3.272494 | 1.698079 | 1.583834 | 2.826679 |
|                                                                                                                                                              | 8 B      | 3.273652 | 2.124080 | 1.697889 | 1.584334 | 2.827165 |
|                                                                                                                                                              | 9 B      | 2.170518 | 3.288523 | 2.845088 | 1.592757 | 3.288749 |
|                                                                                                                                                              | 10 B     | 2.307074 | 2.306585 | 2.903545 | 2.787103 | 2.574408 |
|                                                                                                                                                              | 11 B     | 3.288250 | 2.171647 | 2.844404 | 1.592442 | 3.289057 |
|                                                                                                                                                              | 6 C      | 0.000000 |          |          |          |          |
|                                                                                                                                                              | 7 B      | 3.287369 | 0.000000 |          |          |          |
|                                                                                                                                                              | 8 B      | 3.287422 | 1.842554 | 0.000000 |          |          |
| 9 B                                                                                                                                                          | 2.894094 | 1.859615 | 2.607409 | 0.000000 |          |          |
| 10 B                                                                                                                                                         | 1.549884 | 2.964122 | 2.963418 | 1.789947 | 0.000000 |          |
| 11 B                                                                                                                                                         | 2.894544 | 2.606770 | 1.858594 | 1.813051 | 1.789569 |          |
| 11 B                                                                                                                                                         | 0.000000 |          |          |          |          |          |



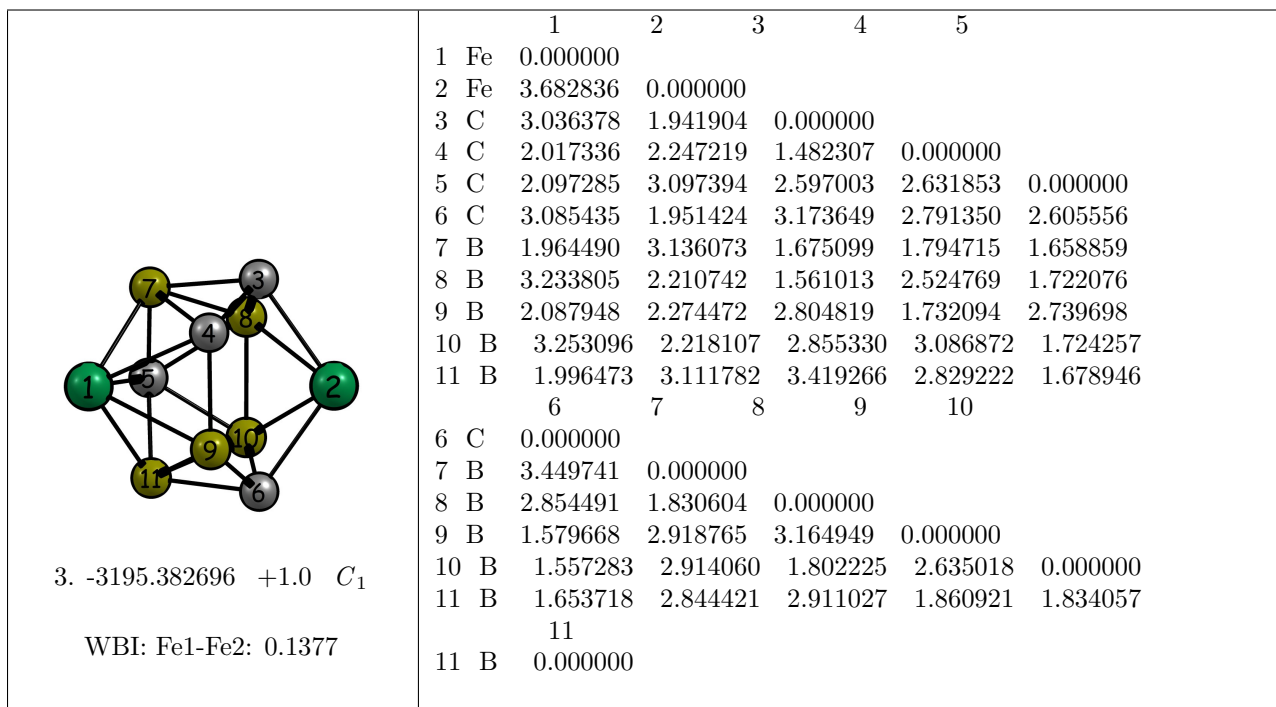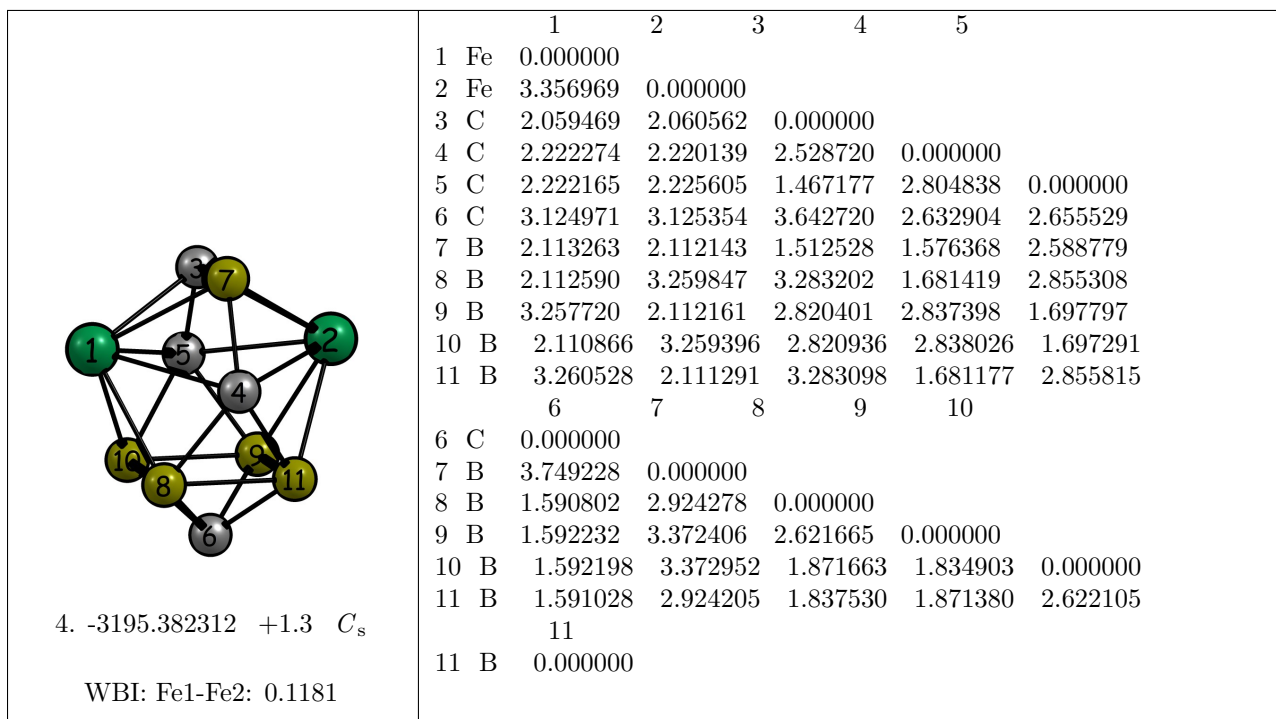

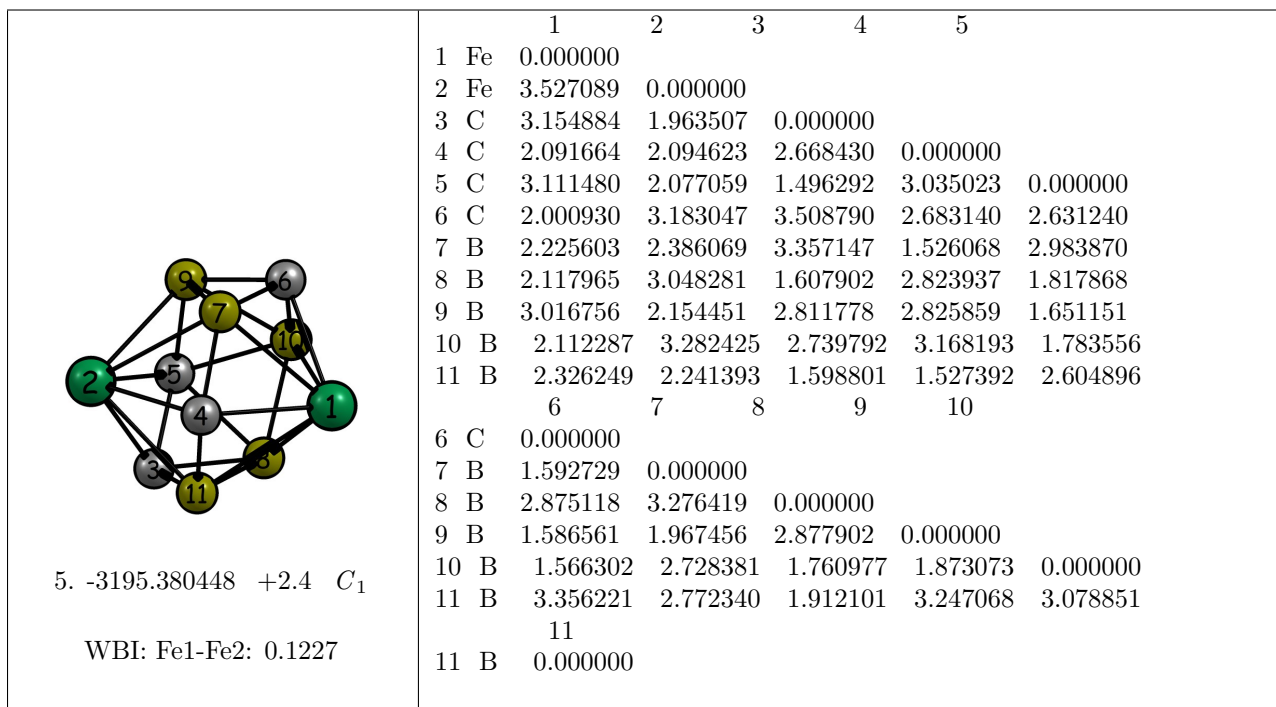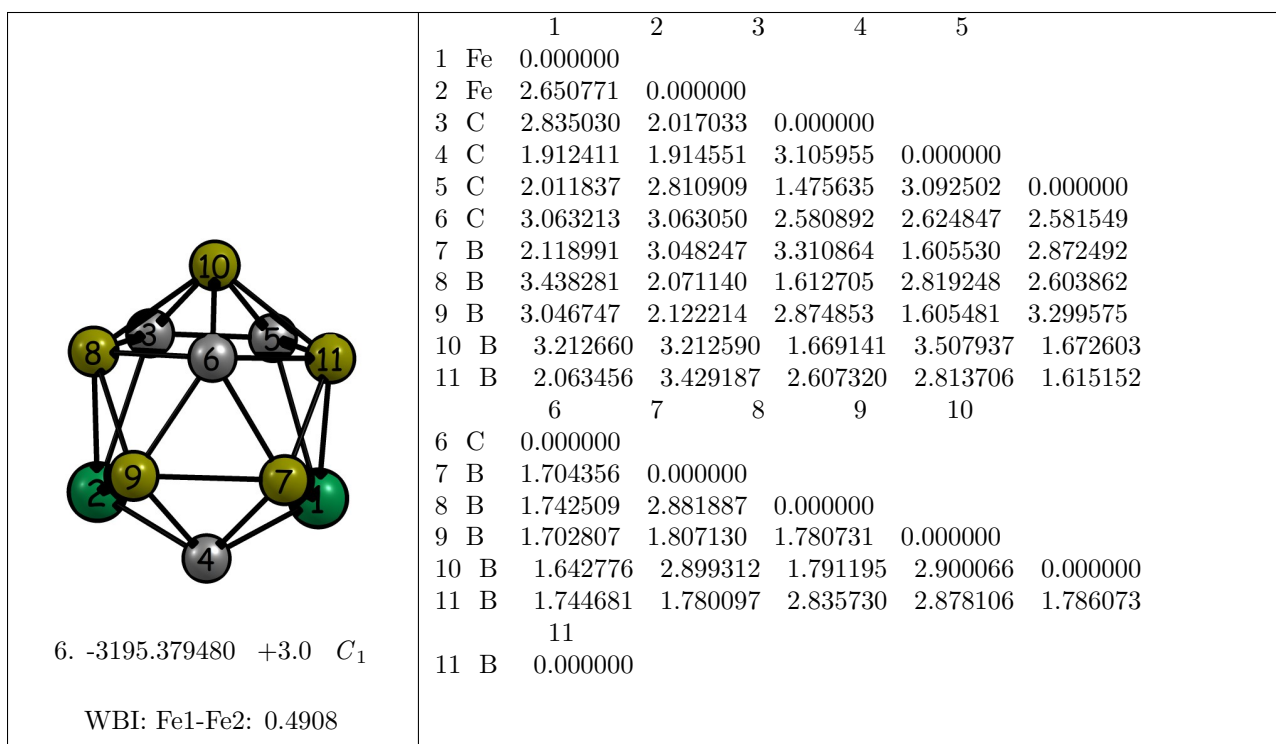

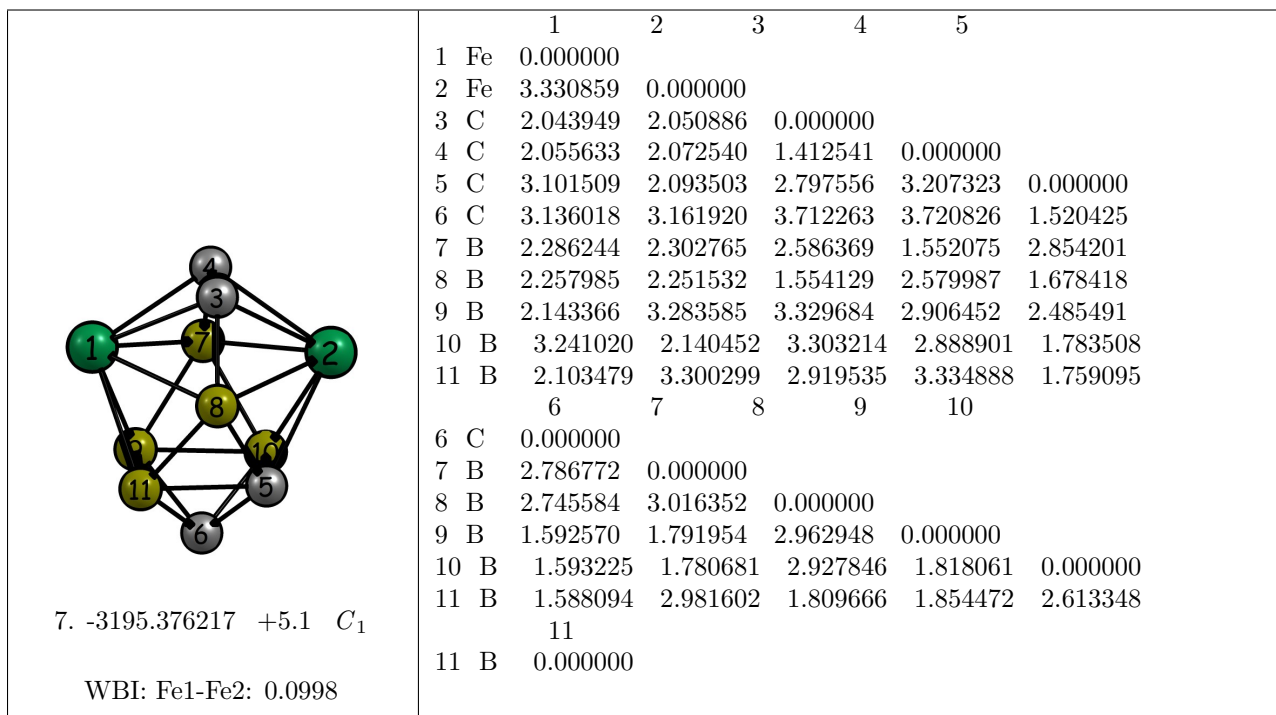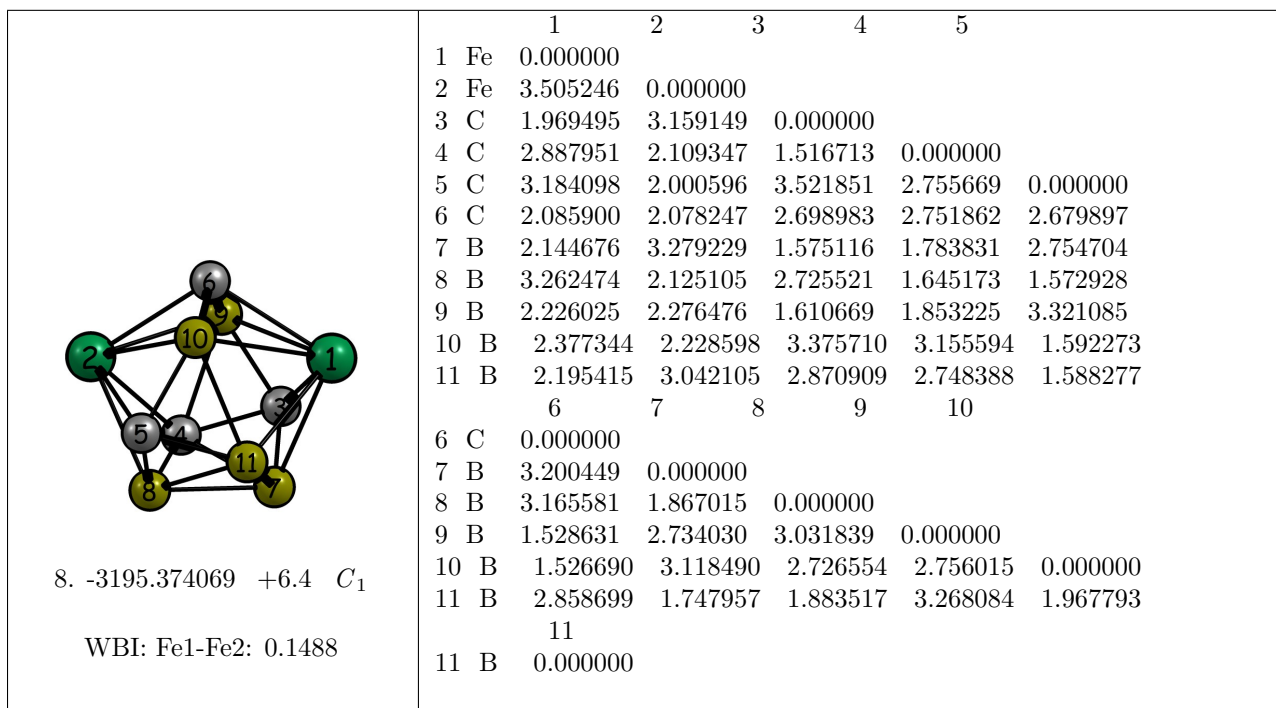

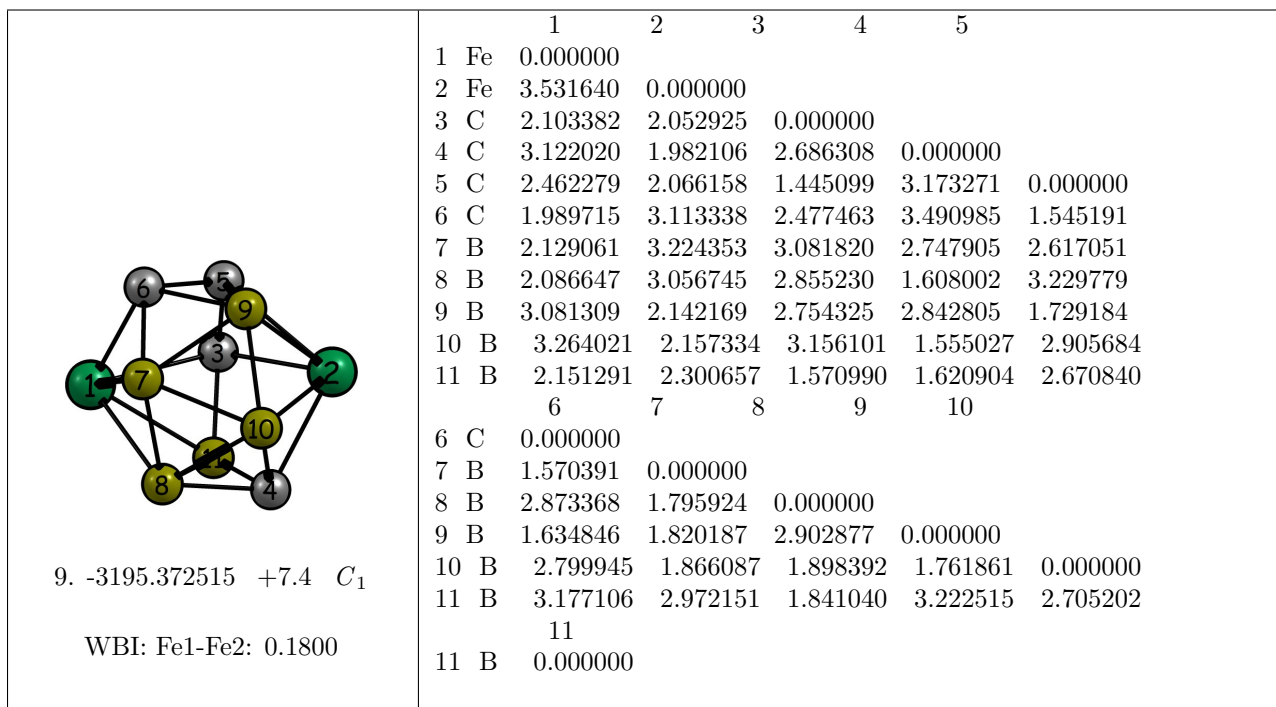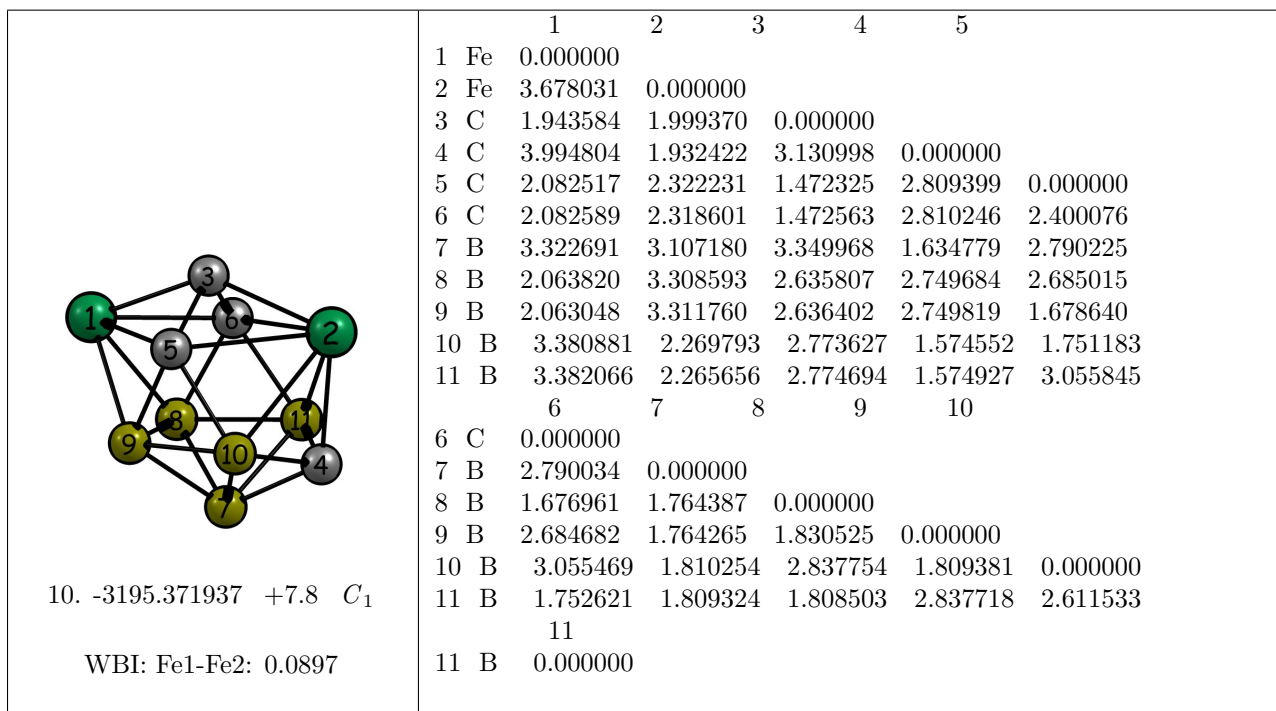

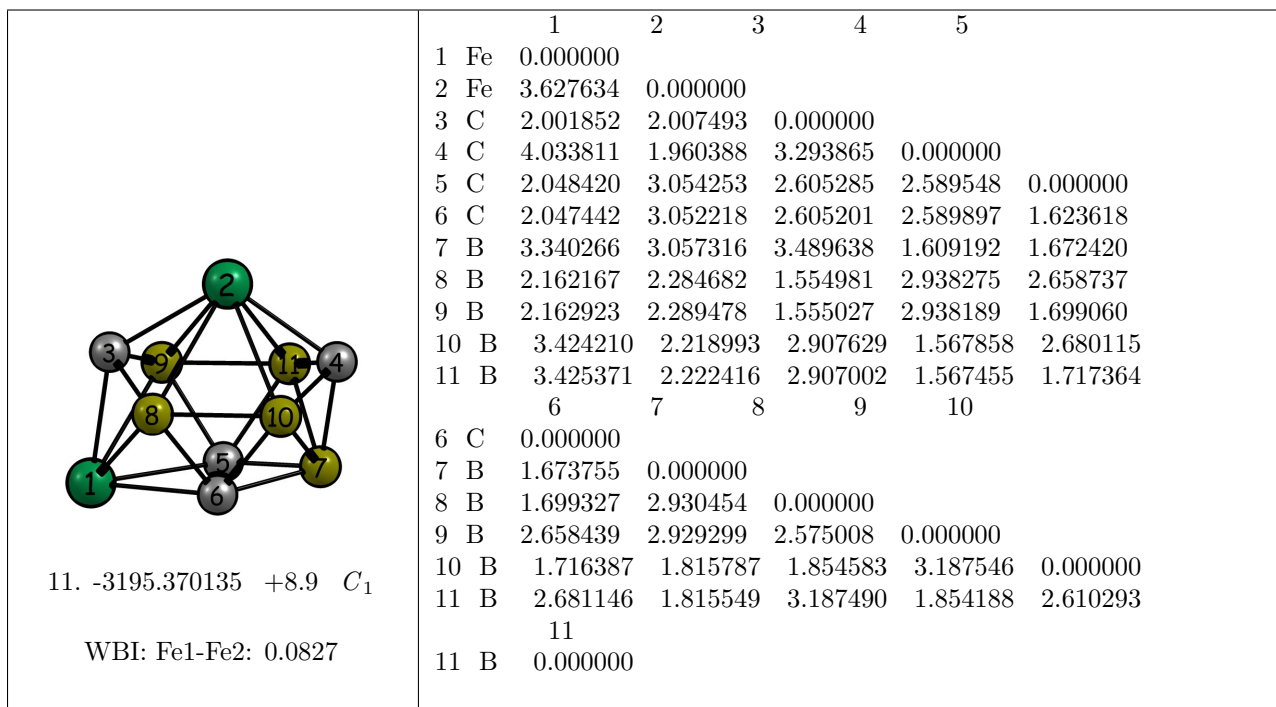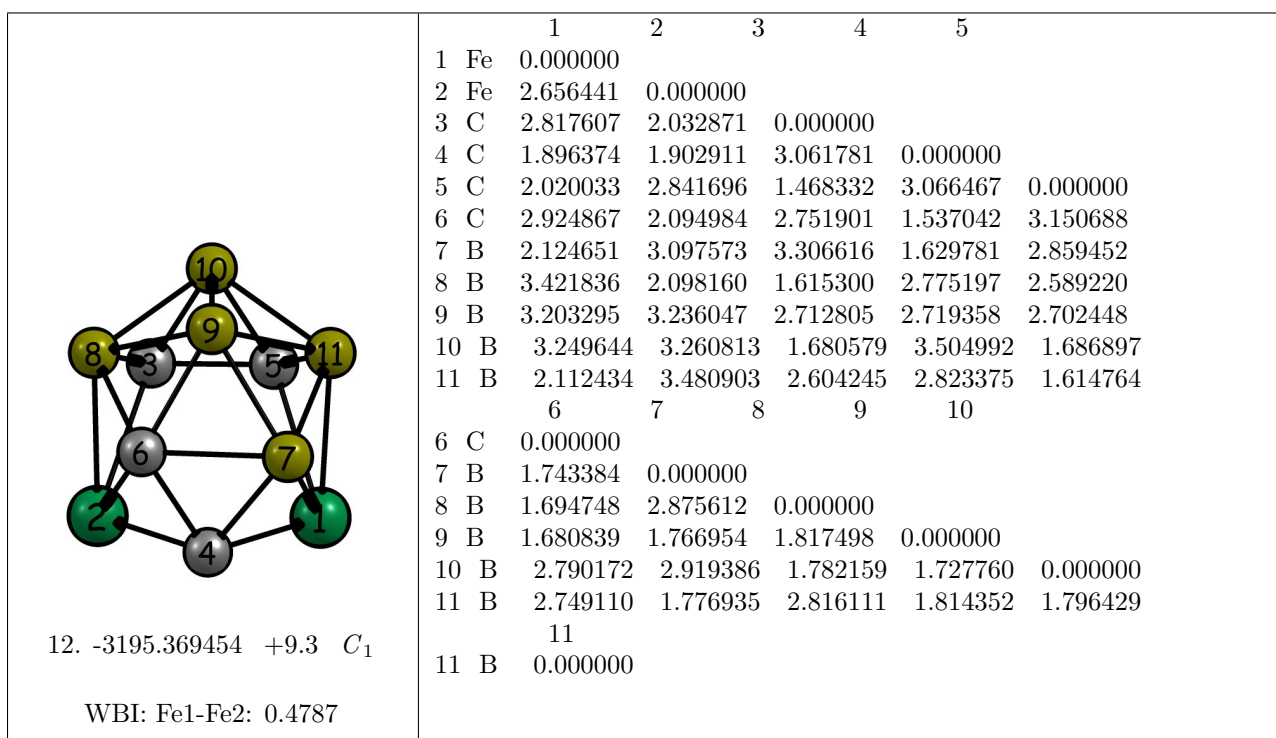

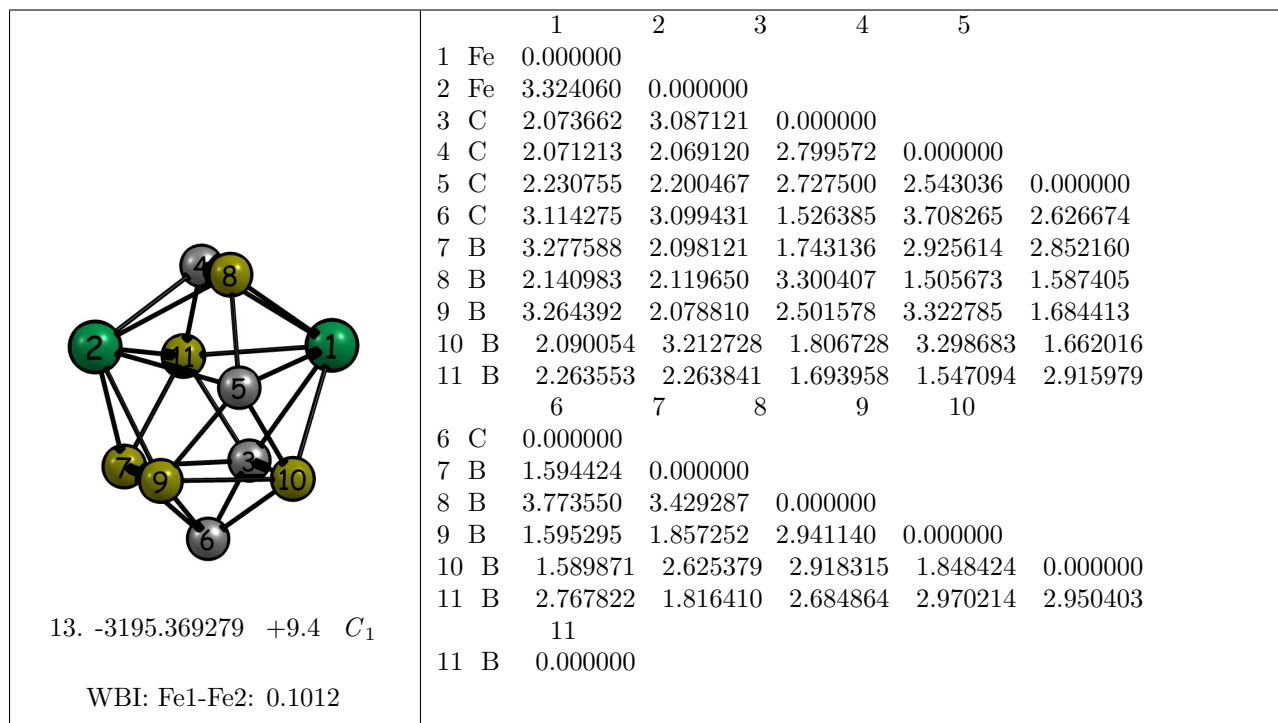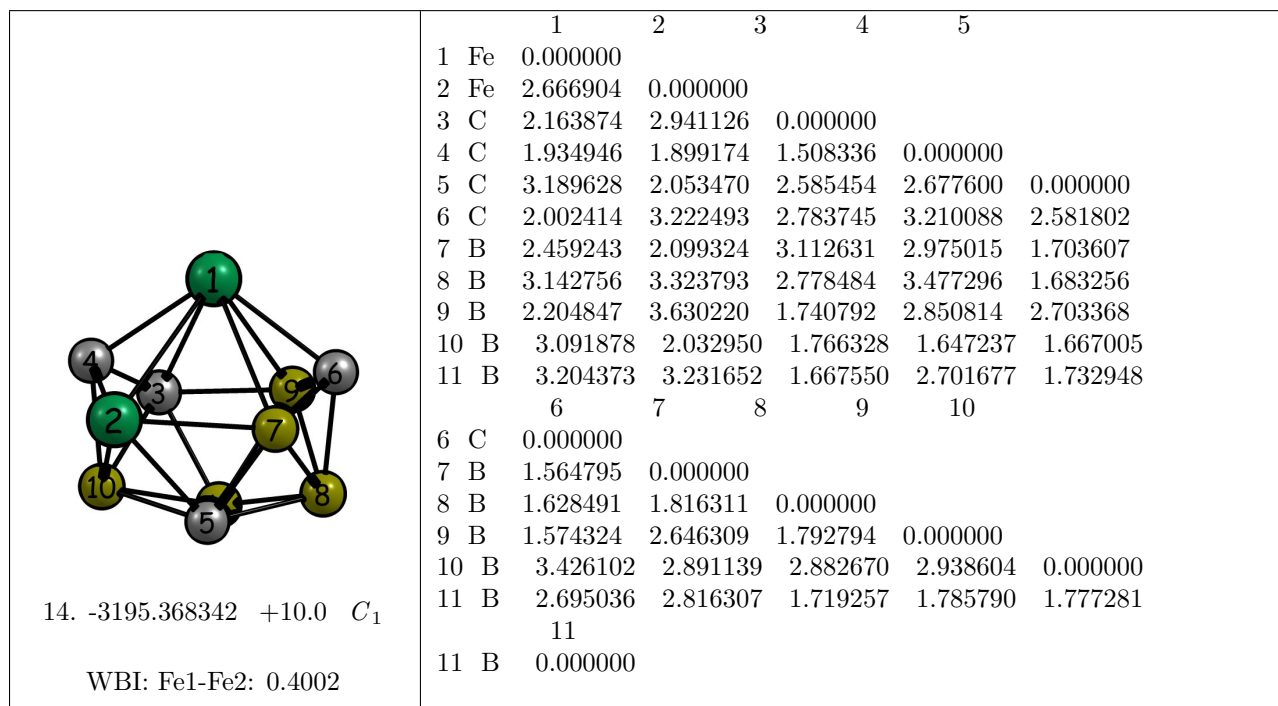

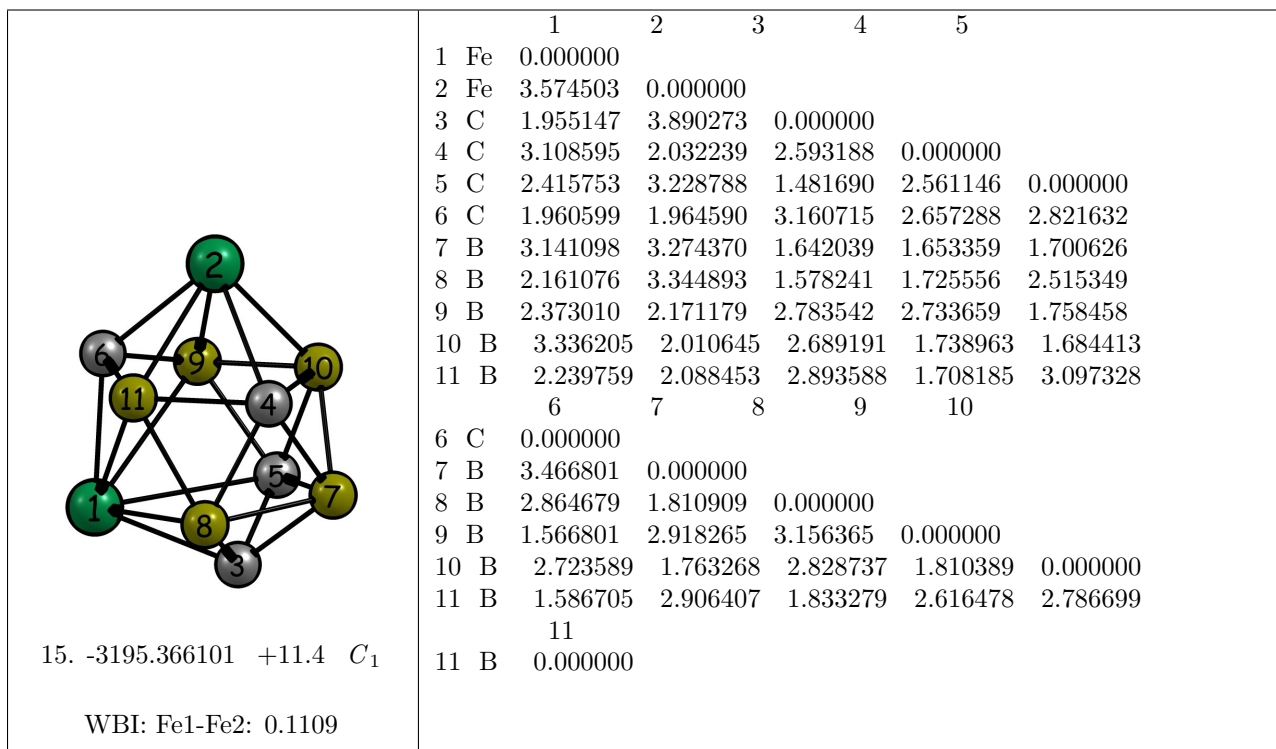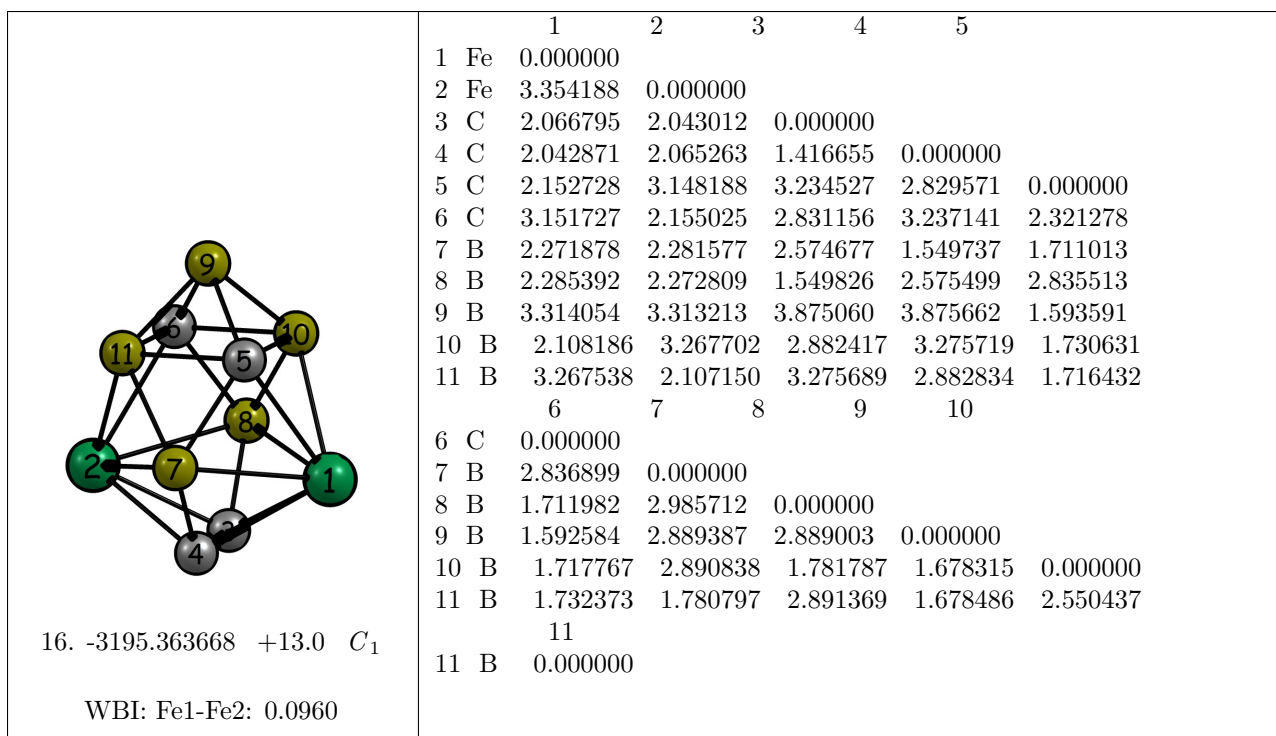

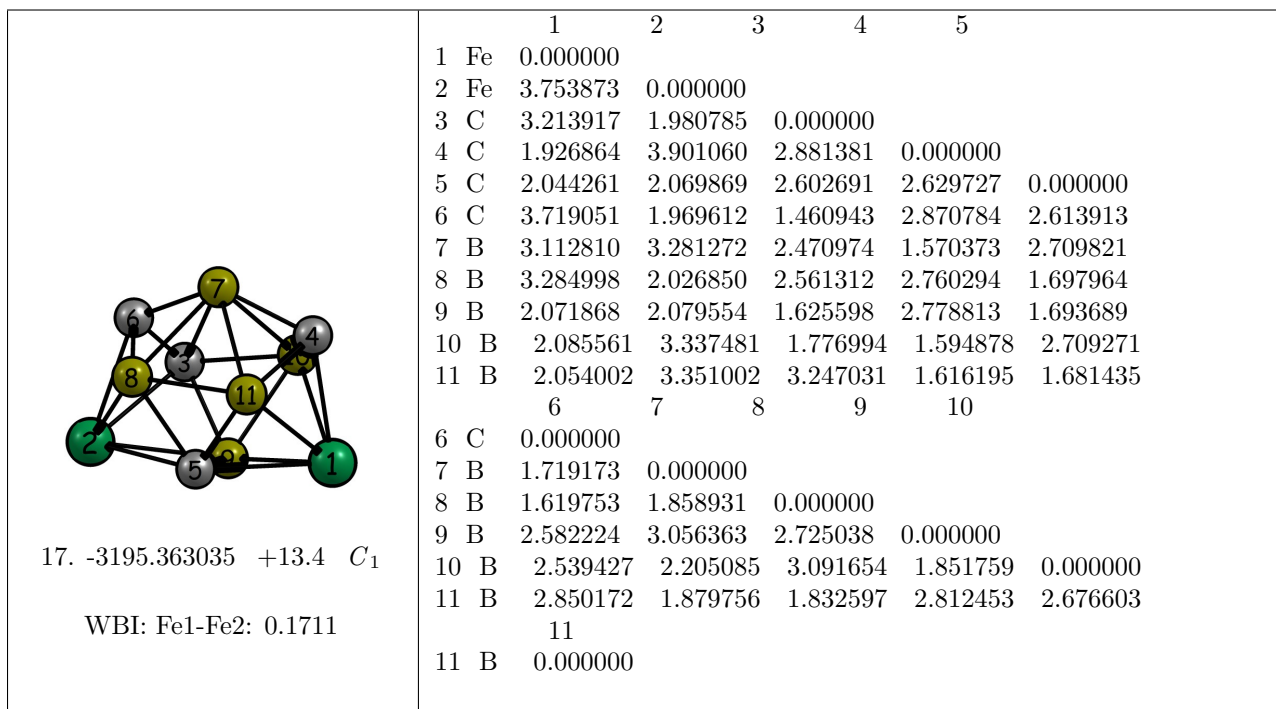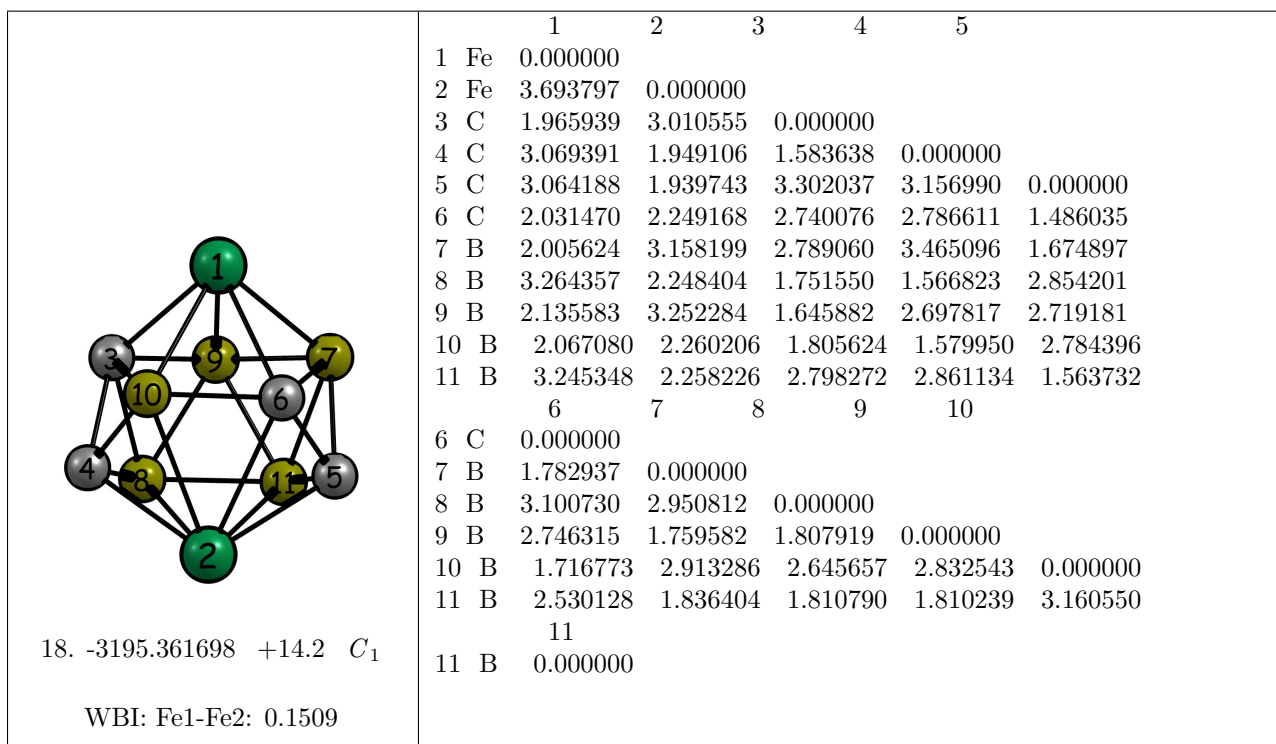



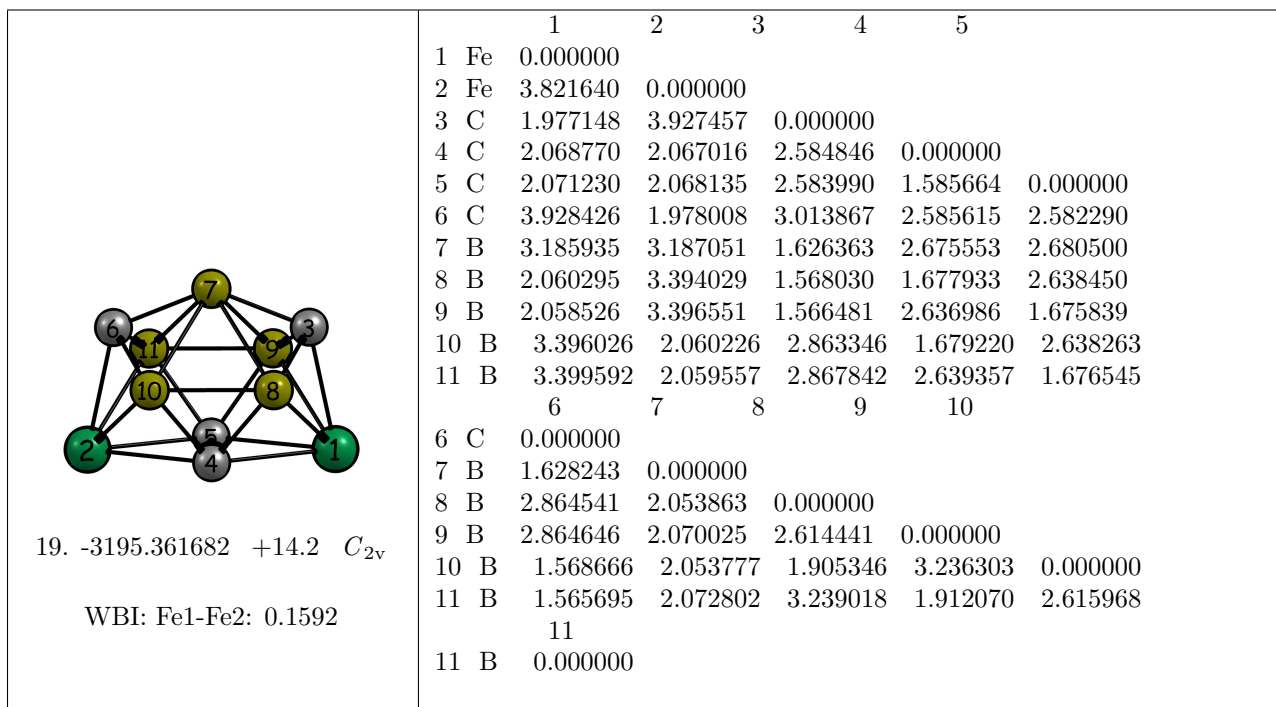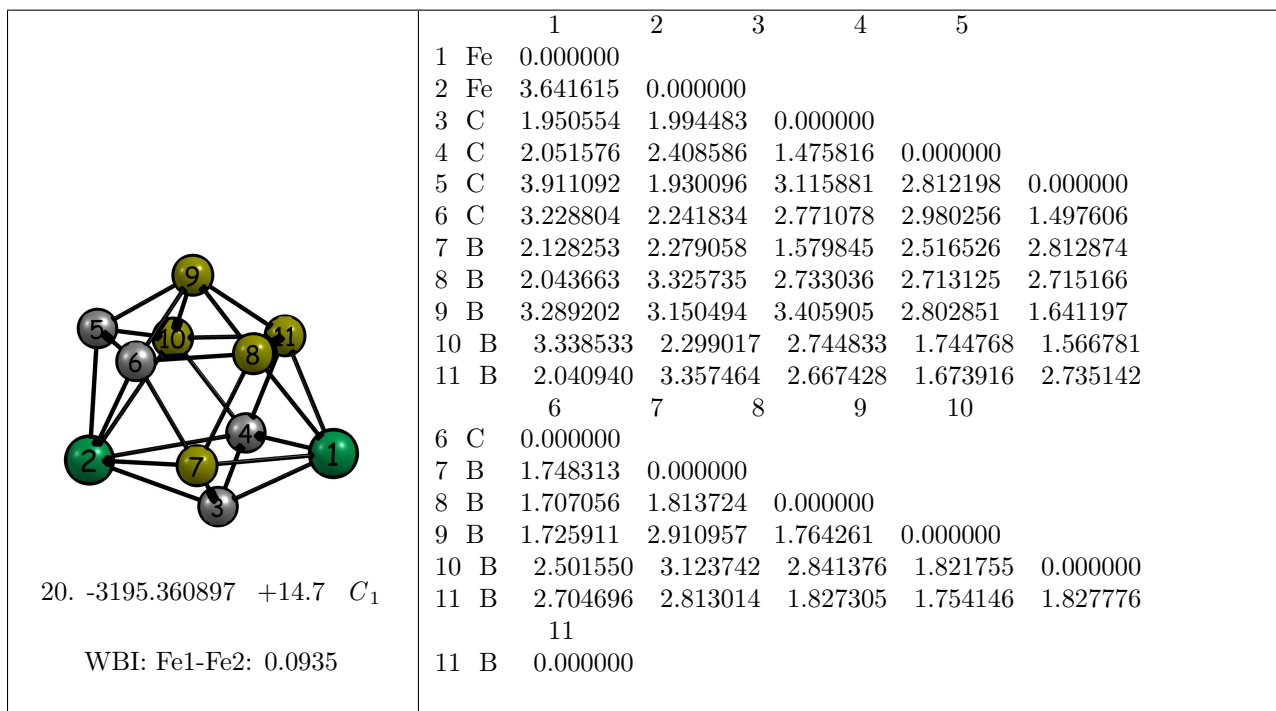

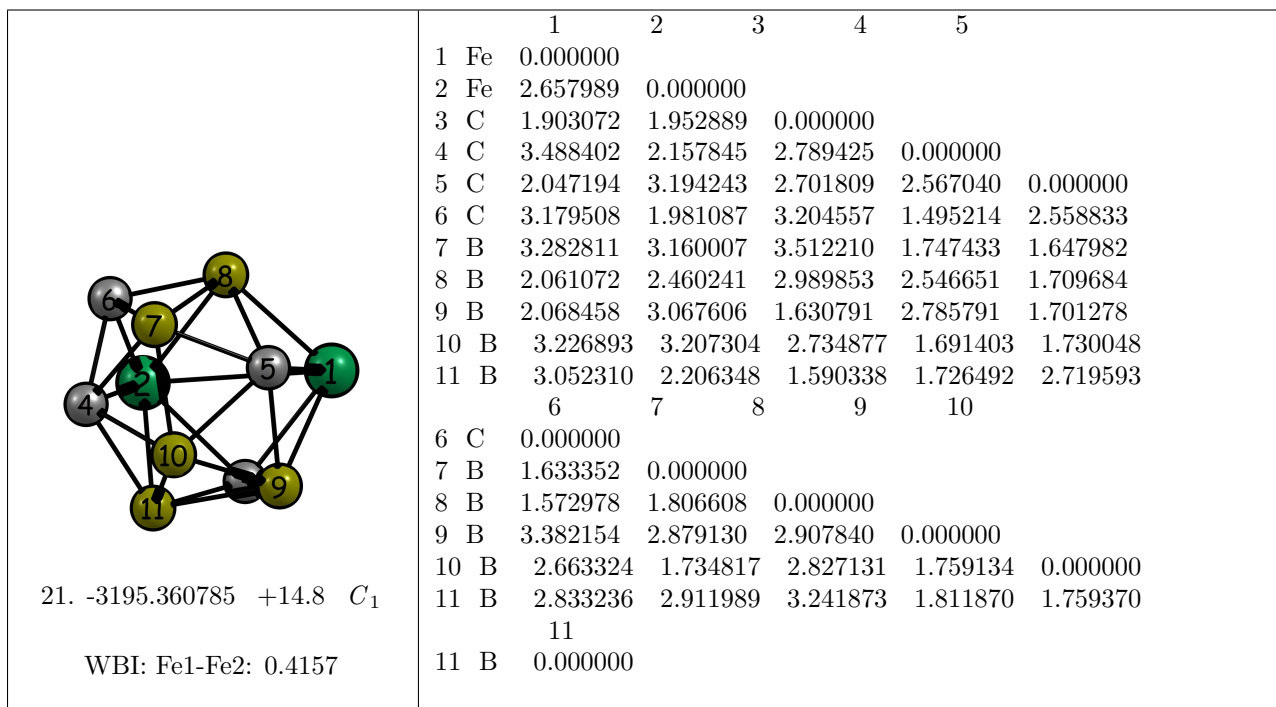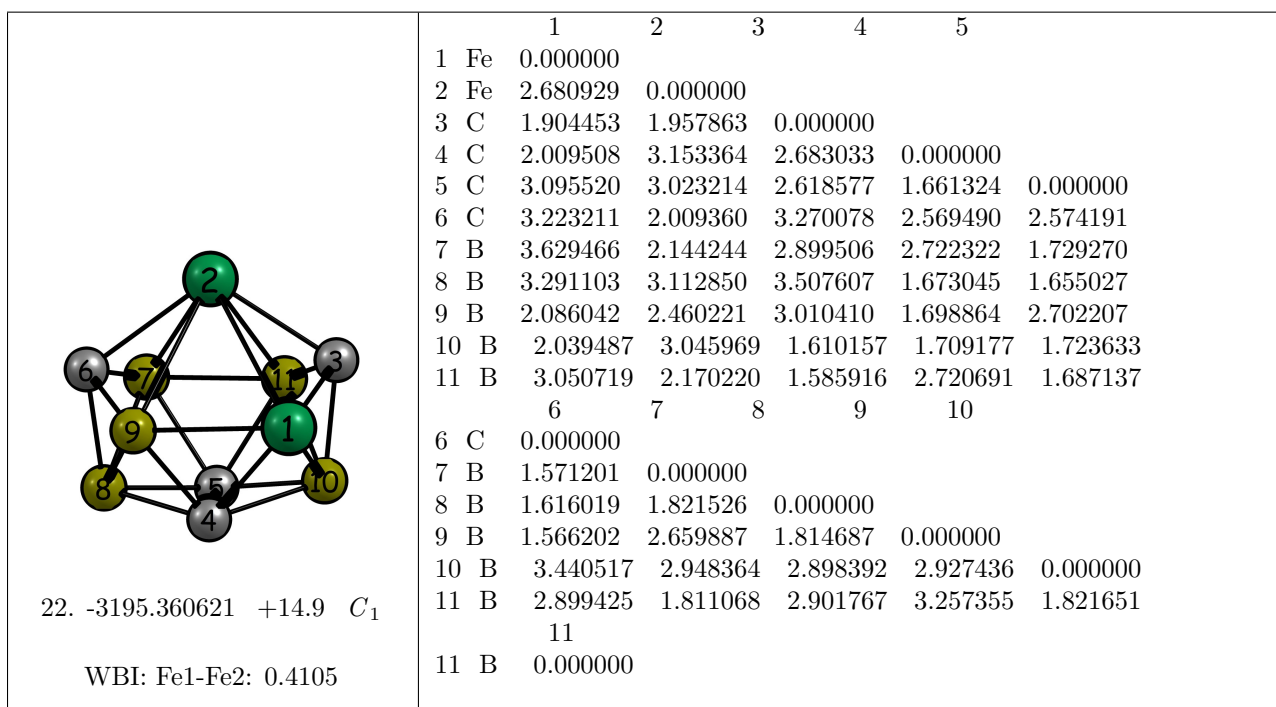

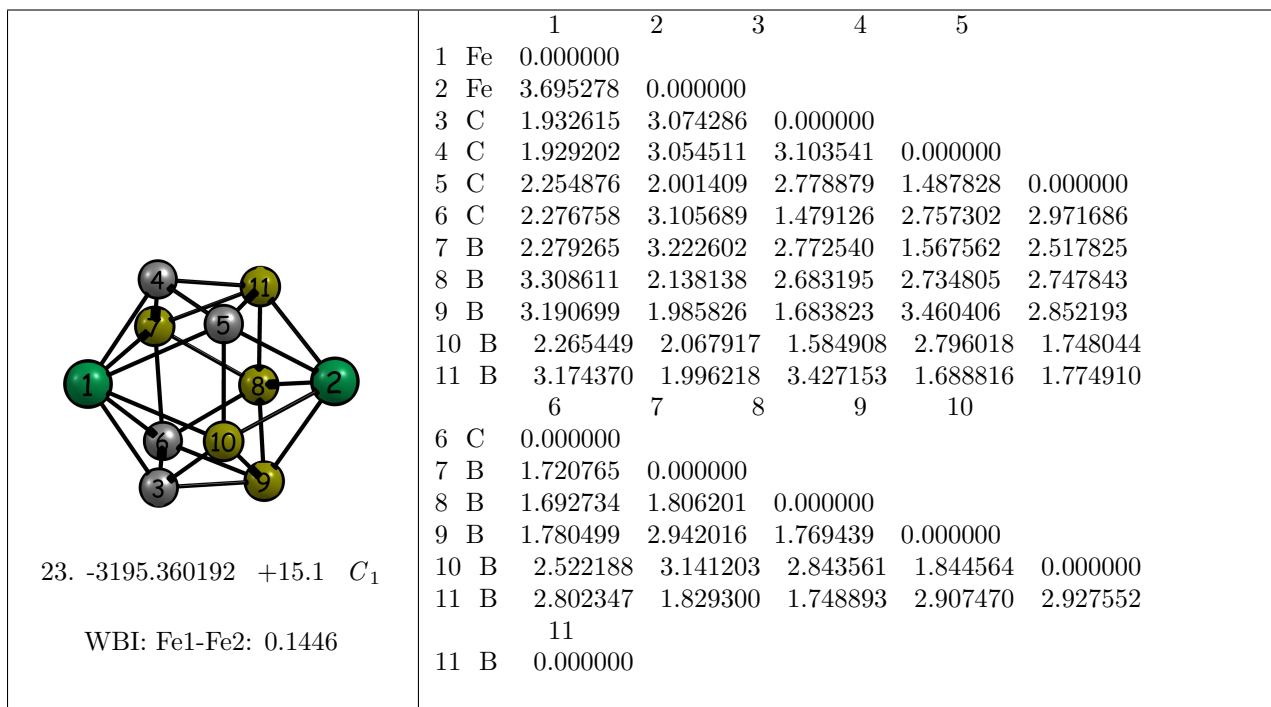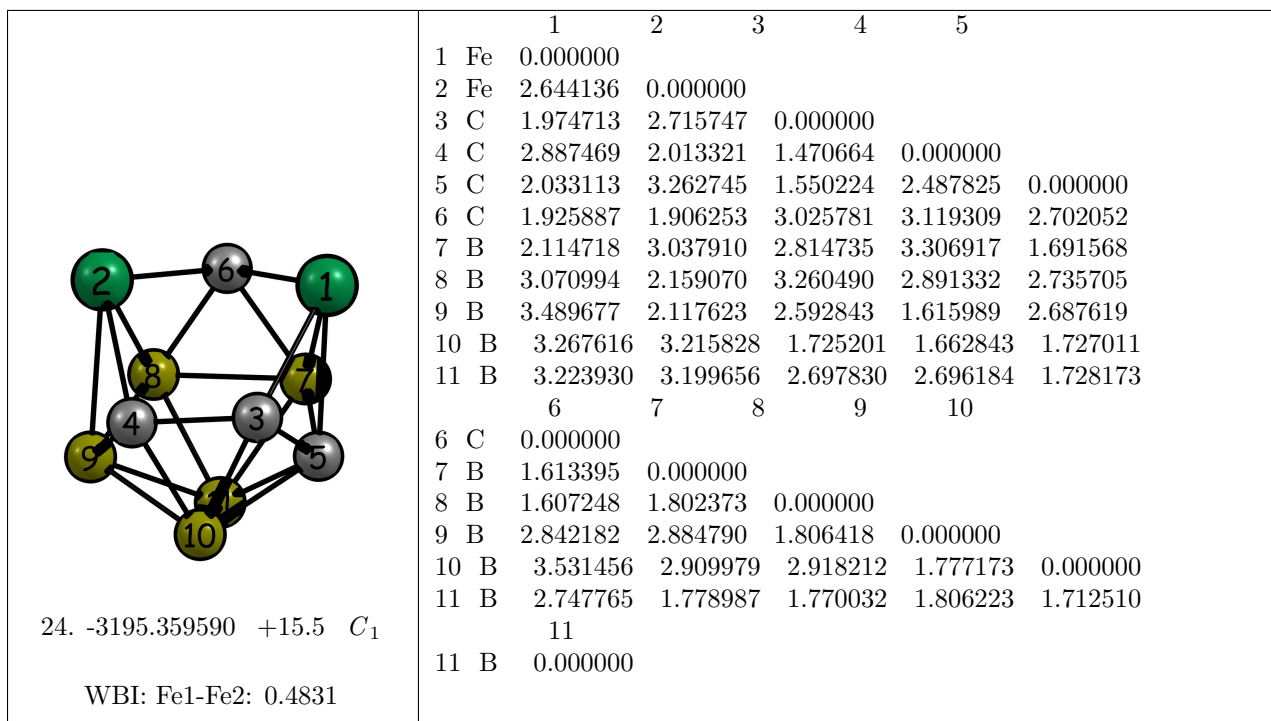

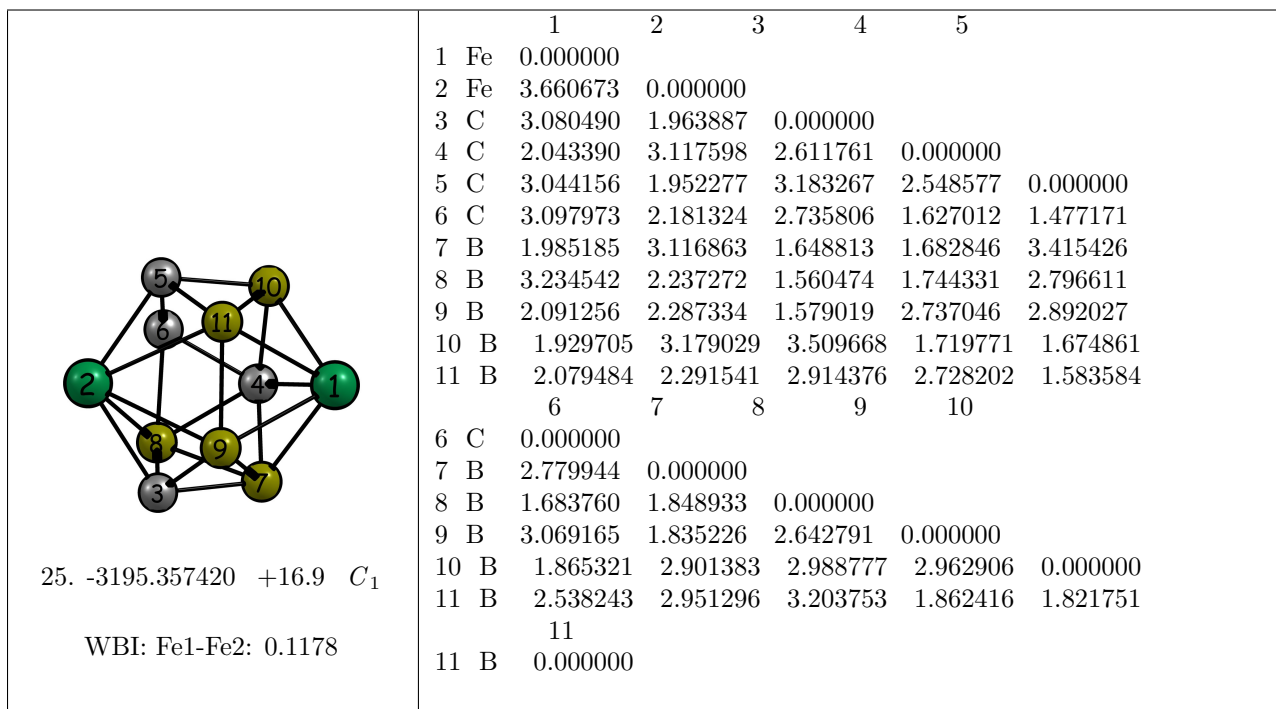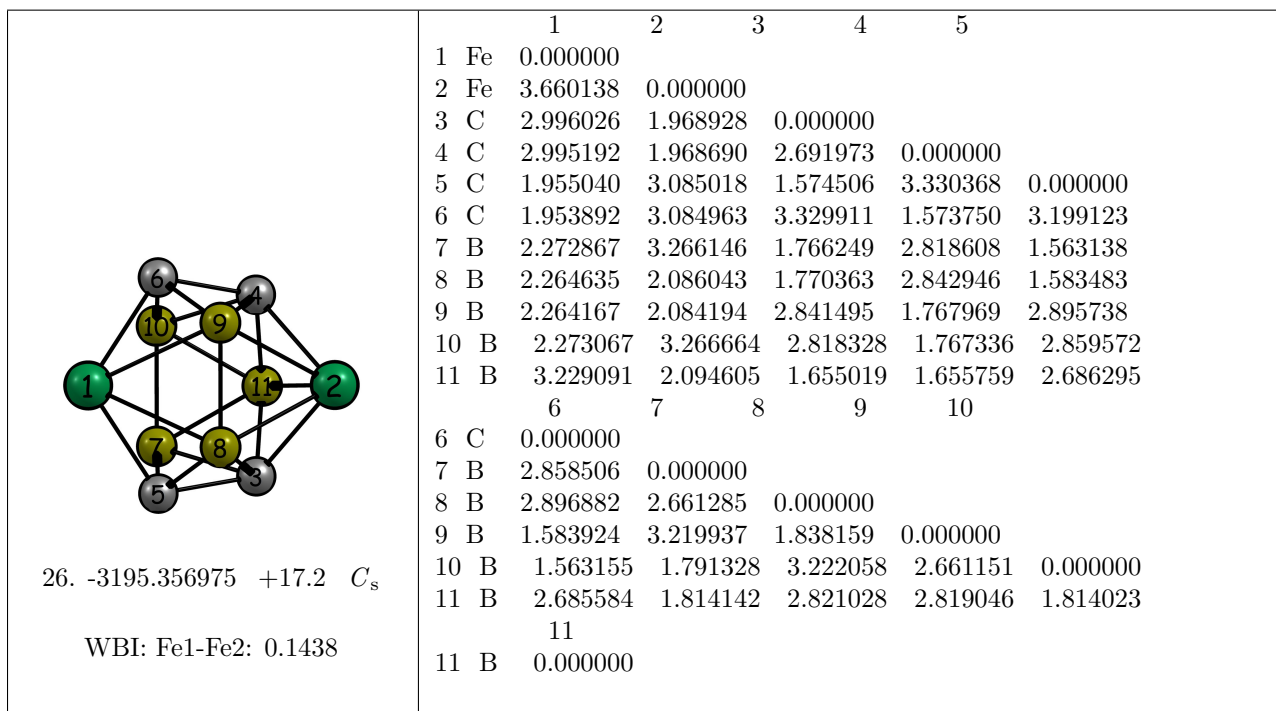

Table S2B: Energy ranking for the lowest-lying  $\text{Cp}_2\text{Fe}_2\text{C}_4\text{B}_5\text{H}_9$  optimized structures at the B3LYP/6-31G(d) level of theory.

| No. | Initial structure                   | Final Energy (a.u.) | Relative Energy (kcal/mol) |
|-----|-------------------------------------|---------------------|----------------------------|
| 1   | 11v-03-OhfusetopentBipyr—fe2c4—1346 | -3196.103946        | 0.0                        |
| 2   | 11v-03-OhfusetopentBipyr—fe2c4—1047 | -3196.103855        | 0.1                        |
| 3   | 11v-03-OhfusetopentBipyr—fe2c4—1002 | -3196.103853        | 0.1                        |
| 4   | 11v-03-OhfusetopentBipyr—fe2c4—975  | -3196.103847        | 0.1                        |
| 5   | 11v-04-Icos-1vx—fe2c4—1672          | -3196.103774        | 0.1                        |
| 6   | 11v-03-OhfusetopentBipyr—fe2c4—1048 | -3196.103771        | 0.1                        |
| 7   | 11v-03-OhfusetopentBipyr—fe2c4—987  | -3196.103771        | 0.1                        |
| 8   | 11v-03-OhfusetopentBipyr—fe2c4—1181 | -3196.103657        | 0.2                        |
| 9   | 11v-03-OhfusetopentBipyr—fe2c4—495  | -3196.103637        | 0.2                        |
| 10  | 11v-03-OhfusetopentBipyr—fe2c4—447  | -3196.103628        | 0.2                        |
| 11  | 11v-03-OhfusetopentBipyr—fe2c4—462  | -3196.103609        | 0.2                        |
| 12  | 11v-03-OhfusetopentBipyr—fe2c4—504  | -3196.103599        | 0.2                        |
| 13  | 11v-03-OhfusetopentBipyr—fe2c4—483  | -3196.103598        | 0.2                        |
| 14  | 11v-03-OhfusetopentBipyr—fe2c4—456  | -3196.103595        | 0.2                        |
| 15  | 11v-02-TricapCube—fe2c4—310         | -3196.103488        | 0.3                        |
| 16  | 11v-04-Icos-1vx—fe2c4—2624          | -3196.103308        | 0.4                        |
| 17  | 11v-04-Icos-1vx—fe2c4—2149          | -3196.103265        | 0.4                        |
| 18  | 11v-04-Icos-1vx—fe2c4—2435          | -3196.103186        | 0.5                        |
| 19  | 11v-04-Icos-1vx—fe2c4—2528          | -3196.10314         | 0.5                        |
| 20  | 11v-04-Icos-1vx—fe2c4—2498          | -3196.103131        | 0.5                        |
| 21  | 11v-04-Icos-1vx—fe2c4—2491          | -3196.10312         | 0.5                        |
| 22  | 11v-04-Icos-1vx—fe2c4—2678          | -3196.103078        | 0.5                        |
| 23  | 11v-03-OhfusetopentBipyr—fe2c4—1150 | -3196.101547        | 1.5                        |
| 24  | 11v-03-OhfusetopentBipyr—fe2c4—761  | -3196.100557        | 2.1                        |
| 25  | 11v-03-OhfusetopentBipyr—fe2c4—725  | -3196.100546        | 2.1                        |
| 26  | 11v-02-TricapCubeA—fe2c4—218        | -3196.099927        | 2.5                        |
| 27  | 11v-02-TricapCubeA—fe2c4—205        | -3196.099923        | 2.5                        |
| 28  | 11v-02-TricapCubeA—fe2c4—212        | -3196.099914        | 2.5                        |
| 29  | 11v-03-OhfusetopentBipyr—fe2c4—744  | -3196.099841        | 2.6                        |
| 30  | 11v-03-OhfusetopentBipyr—fe2c4—735  | -3196.099816        | 2.6                        |
| 31  | 11v-04-Icos-1vx—fe2c4—1599          | -3196.096091        | 4.9                        |
| 32  | 11v-03-OhfusetopentBipyr—fe2c4—1149 | -3196.09609         | 4.9                        |
| 33  | 11v-04-Icos-1vx—fe2c4—1492          | -3196.09593         | 5.0                        |
| 34  | 11v-04-Icos-1vx—fe2c4—1540          | -3196.09593         | 5.0                        |
| 35  | 11v-04-Icos-1vx—fe2c4—1595          | -3196.095877        | 5.1                        |
| 36  | 11v-04-Icos-1vx—fe2c4—1755          | -3196.095839        | 5.1                        |
| 37  | 11v-04-Icos-1vx—fe2c4—1800          | -3196.095839        | 5.1                        |
| 38  | 11v-03-OhfusetopentBipyr—fe2c4—1168 | -3196.09543         | 5.3                        |
| 39  | 11v-03-OhfusetopentBipyr—fe2c4—1210 | -3196.09543         | 5.3                        |
| 40  | 11v-03-OhfusetopentBipyr—fe2c4—770  | -3196.095327        | 5.4                        |
| 41  | 11v-01-PentaCapTrPr—fe2c4—147       | -3196.095206        | 5.5                        |
| 42  | 11v-02-TricapCubeA—fe2c4—225        | -3196.095191        | 5.5                        |
| 43  | 11v-03-OhfusetopentBipyr—fe2c4—1267 | -3196.094946        | 5.6                        |
| 44  | 11v-03-OhfusetopentBipyr—fe2c4—1276 | -3196.094944        | 5.6                        |
| 45  | 11v-03-OhfusetopentBipyr—fe2c4—1288 | -3196.09494         | 5.7                        |
| 46  | 11v-02-TricapCube—fe2c4—248         | -3196.094833        | 5.7                        |
| 47  | 11v-03-OhfusetopentBipyr—fe2c4—1301 | -3196.094823        | 5.7                        |
| 48  | 11v-03-OhfusetopentBipyr—fe2c4—1274 | -3196.094627        | 5.8                        |

|    |                                      |              |      |
|----|--------------------------------------|--------------|------|
| 49 | 11v-01-PentaCapTrPr—fe2c4—185        | -3196.093857 | 6.3  |
| 50 | 11v-04-Icos-1vx—fe2c4—1626           | -3196.093832 | 6.3  |
| 51 | 11v-04-Icos-1vx—fe2c4—1839           | -3196.093809 | 6.4  |
| 52 | 11v-04-Icos-1vx—fe2c4—1878           | -3196.093809 | 6.4  |
| 53 | 11v-04-Icos-1vx—fe2c4—1926           | -3196.093804 | 6.4  |
| 54 | 11v-02-TricapCubeA—fe2c4—211         | -3196.093803 | 6.4  |
| 55 | 11v-02-TricapCubeA—fe2c4—217         | -3196.093803 | 6.4  |
| 56 | 11v-02-TricapCubeA—fe2c4—226         | -3196.093803 | 6.4  |
| 57 | 11v-04-Icos-1vx—fe2c4—1842           | -3196.093786 | 6.4  |
| 58 | 11v-04-Icos-1vx—fe2c4—1875           | -3196.093751 | 6.4  |
| 59 | 11v-04-Icos-1vx—fe2c4—1662           | -3196.093665 | 6.5  |
| 60 | 11v-04-Icos-1vx—fe2c4—1680           | -3196.093665 | 6.5  |
| 61 | 11v-04-Icos-1vx—fe2c4—1579           | -3196.093523 | 6.5  |
| 62 | 11v-04-Icos-1vx—fe2c4—1603           | -3196.093523 | 6.5  |
| 63 | 11v-01-PentaCapTrPr—fe2c4—115        | -3196.090436 | 8.5  |
| 64 | 11v-03-OhfusettoPentBipyr—fe2c4—1101 | -3196.090397 | 8.5  |
| 65 | 11v-03-OhfusettoPentBipyr—fe2c4—1134 | -3196.090397 | 8.5  |
| 66 | 11v-03-OhfusettoPentBipyr—fe2c4—1143 | -3196.090397 | 8.5  |
| 67 | 11v-03-OhfusettoPentBipyr—fe2c4—519  | -3196.090345 | 8.5  |
| 68 | 11v-03-OhfusettoPentBipyr—fe2c4—525  | -3196.090335 | 8.5  |
| 69 | 11v-03-OhfusettoPentBipyr—fe2c4—555  | -3196.09033  | 8.5  |
| 70 | 11v-03-OhfusettoPentBipyr—fe2c4—1102 | -3196.09032  | 8.6  |
| 71 | 11v-04-Icos-1vx—fe2c4—2970           | -3196.088349 | 9.8  |
| 72 | 11v-04-Icos-1vx—fe2c4—2755           | -3196.088299 | 9.8  |
| 73 | 11v-04-Icos-1vx—fe2c4—2773           | -3196.088299 | 9.8  |
| 74 | 11v-04-Icos-1vx—fe2c4—2767           | -3196.088281 | 9.8  |
| 75 | 11v-04-Icos-1vx—fe2c4—2570           | -3196.088262 | 9.8  |
| 76 | 11v-04-Icos-1vx—fe2c4—3170           | -3196.088198 | 9.9  |
| 77 | 11v-04-Icos-1vx—fe2c4—3195           | -3196.088198 | 9.9  |
| 78 | 11v-04-Icos-1vx—fe2c4—3188           | -3196.088195 | 9.9  |
| 79 | 11v-04-Icos-1vx—fe2c4—3202           | -3196.088165 | 9.9  |
| 80 | 11v-04-Icos-1vx—fe2c4—2479           | -3196.088143 | 9.9  |
| 81 | 11v-04-Icos-1vx—fe2c4—1582           | -3196.088121 | 9.9  |
| 82 | 11v-04-Icos-1vx—fe2c4—1600           | -3196.088121 | 9.9  |
| 83 | 11v-04-Icos-1vx—fe2c4—1593           | -3196.087945 | 10.0 |
| 84 | 11v-02-TricapCube—fe2c4—308          | -3196.087692 | 10.2 |
| 85 | 11v-04-Icos-1vx—fe2c4—2946           | -3196.087492 | 10.3 |
| 86 | 11v-04-Icos-1vx—fe2c4—2113           | -3196.087489 | 10.3 |
| 87 | 11v-04-Icos-1vx—fe2c4—3151           | -3196.087489 | 10.3 |
| 88 | 11v-04-Icos-1vx—fe2c4—2137           | -3196.087486 | 10.3 |
| 89 | 11v-04-Icos-1vx—fe2c4—2904           | -3196.087484 | 10.3 |
| 90 | 11v-04-Icos-1vx—fe2c4—3048           | -3196.087484 | 10.3 |
| 91 | 11v-04-Icos-1vx—fe2c4—3163           | -3196.087483 | 10.3 |
| 92 | 11v-04-Icos-1vx—fe2c4—2130           | -3196.087482 | 10.3 |
| 93 | 11v-04-Icos-1vx—fe2c4—2127           | -3196.087424 | 10.4 |
| 94 | 11v-04-Icos-1vx—fe2c4—2504           | -3196.08742  | 10.4 |
| 95 | 11v-04-Icos-1vx—fe2c4—2527           | -3196.087411 | 10.4 |
| 96 | 11v-04-Icos-1vx—fe2c4—2509           | -3196.087407 | 10.4 |
| 97 | 11v-02-TricapCube—fe2c4—277          | -3196.087398 | 10.4 |
| 98 | 11v-02-TricapCube—fe2c4—295          | -3196.087398 | 10.4 |
| 99 | 11v-04-Icos-1vx—fe2c4—1484           | -3196.087393 | 10.4 |

|     |                                      |              |      |
|-----|--------------------------------------|--------------|------|
| 100 | 11v-04-Icos-1vx—fe2c4—1491           | -3196.087393 | 10.4 |
| 101 | 11v-04-Icos-1vx—fe2c4—1513           | -3196.087393 | 10.4 |
| 102 | 11v-04-Icos-1vx—fe2c4—1552           | -3196.087393 | 10.4 |
| 103 | 11v-04-Icos-1vx—fe2c4—3208           | -3196.087371 | 10.4 |
| 104 | 11v-04-Icos-1vx—fe2c4—3190           | -3196.087367 | 10.4 |
| 105 | 11v-04-Icos-1vx—fe2c4—2642           | -3196.087321 | 10.4 |
| 106 | 11v-04-Icos-1vx—fe2c4—2622           | -3196.08732  | 10.4 |
| 107 | 11v-04-Icos-1vx—fe2c4—2600           | -3196.087315 | 10.4 |
| 108 | 11v-04-Icos-1vx—fe2c4—2732           | -3196.087215 | 10.5 |
| 109 | 11v-04-Icos-1vx—fe2c4—2654           | -3196.087213 | 10.5 |
| 110 | 11v-04-Icos-1vx—fe2c4—2664           | -3196.087212 | 10.5 |
| 111 | 11v-02-TricapCube—fe2c4—307          | -3196.087092 | 10.6 |
| 112 | 11v-02-TricapCube—fe2c4—313          | -3196.087092 | 10.6 |
| 113 | 11v-02-TricapCube—fe2c4—319          | -3196.087092 | 10.6 |
| 114 | 11v-04-Icos-1vx—fe2c4—1515           | -3196.087059 | 10.6 |
| 115 | 11v-04-Icos-1vx—fe2c4—1526           | -3196.087059 | 10.6 |
| 116 | 11v-04-Icos-1vx—fe2c4—1545           | -3196.087059 | 10.6 |
| 117 | 11v-04-Icos-1vx—fe2c4—2676           | -3196.086978 | 10.6 |
| 118 | 11v-04-Icos-1vx—fe2c4—2618           | -3196.086975 | 10.6 |
| 119 | 11v-04-Icos-1vx—fe2c4—2569           | -3196.086784 | 10.8 |
| 120 | 11v-04-Icos-1vx—fe2c4—2411           | -3196.085869 | 11.3 |
| 121 | 11v-04-Icos-1vx—fe2c4—2429           | -3196.085827 | 11.4 |
| 122 | 11v-02-TricapCube—fe2c4—273          | -3196.085807 | 11.4 |
| 123 | 11v-04-Icos-1vx—fe2c4—2902           | -3196.085805 | 11.4 |
| 124 | 11v-04-Icos-1vx—fe2c4—2417           | -3196.085804 | 11.4 |
| 125 | 11v-04-Icos-1vx—fe2c4—2522           | -3196.085793 | 11.4 |
| 126 | 11v-04-Icos-1vx—fe2c4—2651           | -3196.085763 | 11.4 |
| 127 | 11v-04-Icos-1vx—fe2c4—2627           | -3196.08576  | 11.4 |
| 128 | 11v-04-Icos-1vx—fe2c4—2492           | -3196.08575  | 11.4 |
| 129 | 11v-02-TricapCube—fe2c4—299          | -3196.085628 | 11.5 |
| 130 | 11v-02-TricapCube—fe2c4—311          | -3196.085628 | 11.5 |
| 131 | 11v-04-Icos-1vx—fe2c4—2486           | -3196.08524  | 11.7 |
| 132 | 11v-04-Icos-1vx—fe2c4—1771           | -3196.084427 | 12.2 |
| 133 | 11v-04-Icos-1vx—fe2c4—1830           | -3196.084427 | 12.2 |
| 134 | 11v-03-OhfusettoPentBipyr—fe2c4—652  | -3196.08416  | 12.4 |
| 135 | 11v-03-OhfusettoPentBipyr—fe2c4—1028 | -3196.083872 | 12.6 |
| 136 | 11v-04-Icos-1vx—fe2c4—1588           | -3196.083666 | 12.7 |
| 137 | 11v-04-Icos-1vx—fe2c4—1606           | -3196.083665 | 12.7 |
| 138 | 11v-04-Icos-1vx—fe2c4—1824           | -3196.083646 | 12.7 |
| 139 | 11v-02-TricapCube—fe2c4—232          | -3196.083626 | 12.8 |
| 140 | 11v-04-Icos-1vx—fe2c4—1772           | -3196.083609 | 12.8 |
| 141 | 11v-03-OhfusettoPentBipyr—fe2c4—651  | -3196.083181 | 13.0 |
| 142 | 11v-01-PentaCapTrPr—fe2c4—95         | -3196.082699 | 13.3 |
| 143 | 11v-01-PentaCapTrPr—fe2c4—89         | -3196.082656 | 13.4 |
| 144 | 11v-01-PentaCapTrPr—fe2c4—26         | -3196.082604 | 13.4 |
| 145 | 11v-04-Icos-1vx—fe2c4—1686           | -3196.0825   | 13.5 |
| 146 | 11v-04-Icos-1vx—fe2c4—1692           | -3196.0825   | 13.5 |
| 147 | 11v-04-Icos-1vx—fe2c4—1716           | -3196.082494 | 13.5 |
| 148 | 11v-04-Icos-1vx—fe2c4—1689           | -3196.08235  | 13.6 |
| 149 | 11v-04-Icos-1vx—fe2c4—1695           | -3196.08235  | 13.6 |
| 150 | 11v-04-Icos-1vx—fe2c4—2265           | -3196.082216 | 13.6 |

|     |                                        |              |      |
|-----|----------------------------------------|--------------|------|
| 151 | 11v-04-Icos-1vx— fe2c4— 2459           | -3196.082172 | 13.7 |
| 152 | 11v-04-Icos-1vx— fe2c4— 2465           | -3196.082172 | 13.7 |
| 153 | 11v-04-Icos-1vx— fe2c4— 2468           | -3196.082172 | 13.7 |
| 154 | 11v-04-Icos-1vx— fe2c4— 2474           | -3196.082172 | 13.7 |
| 155 | 11v-03-OhfusettoPentBipyr— fe2c4— 541  | -3196.082136 | 13.7 |
| 156 | 11v-01-PentaCapTrPr— fe2c4— 20         | -3196.082123 | 13.7 |
| 157 | 11v-04-Icos-1vx— fe2c4— 2875           | -3196.081986 | 13.8 |
| 158 | 11v-03-OhfusettoPentBipyr— fe2c4— 970  | -3196.081975 | 13.8 |
| 159 | 11v-04-Icos-1vx— fe2c4— 2756           | -3196.081973 | 13.8 |
| 160 | 11v-03-OhfusettoPentBipyr— fe2c4— 964  | -3196.08197  | 13.8 |
| 161 | 11v-01-PentaCapTrPr— fe2c4— 23         | -3196.081955 | 13.8 |
| 162 | 11v-04-Icos-1vx— fe2c4— 2426           | -3196.081953 | 13.8 |
| 163 | 11v-04-Icos-1vx— fe2c4— 2415           | -3196.08195  | 13.8 |
| 164 | 11v-04-Icos-1vx— fe2c4— 2520           | -3196.081219 | 14.3 |
| 165 | 11v-04-Icos-1vx— fe2c4— 2385           | -3196.081208 | 14.3 |
| 166 | 11v-04-Icos-1vx— fe2c4— 1888           | -3196.0812   | 14.3 |
| 167 | 11v-04-Icos-1vx— fe2c4— 1906           | -3196.081181 | 14.3 |
| 168 | 11v-01-PentaCapTrPr— fe2c4— 188        | -3196.081124 | 14.3 |
| 169 | 11v-04-Icos-1vx— fe2c4— 3244           | -3196.081075 | 14.4 |
| 170 | 11v-04-Icos-1vx— fe2c4— 3274           | -3196.081036 | 14.4 |
| 171 | 11v-04-Icos-1vx— fe2c4— 1932           | -3196.080833 | 14.5 |
| 172 | 11v-03-OhfusettoPentBipyr— fe2c4— 1076 | -3196.080649 | 14.6 |
| 173 | 11v-04-Icos-1vx— fe2c4— 1848           | -3196.080635 | 14.6 |
| 174 | 11v-03-OhfusettoPentBipyr— fe2c4— 1293 | -3196.080427 | 14.8 |
| 175 | 11v-04-Icos-1vx— fe2c4— 1658           | -3196.080408 | 14.8 |
| 176 | 11v-03-OhfusettoPentBipyr— fe2c4— 1318 | -3196.080386 | 14.8 |
| 177 | 11v-03-OhfusettoPentBipyr— fe2c4— 1082 | -3196.080381 | 14.8 |
| 178 | 11v-03-OhfusettoPentBipyr— fe2c4— 1069 | -3196.08038  | 14.8 |
| 179 | 11v-03-OhfusettoPentBipyr— fe2c4— 1345 | -3196.080352 | 14.8 |
| 180 | 11v-04-Icos-1vx— fe2c4— 1838           | -3196.080339 | 14.8 |
| 181 | 11v-04-Icos-1vx— fe2c4— 1874           | -3196.080339 | 14.8 |
| 182 | 11v-04-Icos-1vx— fe2c4— 1944           | -3196.080339 | 14.8 |
| 183 | 11v-01-PentaCapTrPr— fe2c4— 183        | -3196.080135 | 14.9 |
| 184 | 11v-04-Icos-1vx— fe2c4— 1578           | -3196.080103 | 15.0 |
| 185 | 11v-03-OhfusettoPentBipyr— fe2c4— 492  | -3196.080039 | 15.0 |
| 186 | 11v-03-OhfusettoPentBipyr— fe2c4— 480  | -3196.080023 | 15.0 |
| 187 | 11v-04-Icos-1vx— fe2c4— 2895           | -3196.079981 | 15.0 |
| 188 | 11v-04-Icos-1vx— fe2c4— 1870           | -3196.079974 | 15.0 |
| 189 | 11v-04-Icos-1vx— fe2c4— 1918           | -3196.079974 | 15.0 |
| 190 | 11v-04-Icos-1vx— fe2c4— 1624           | -3196.079963 | 15.0 |
| 191 | 11v-04-Icos-1vx— fe2c4— 1636           | -3196.079963 | 15.0 |
| 192 | 11v-04-Icos-1vx— fe2c4— 1654           | -3196.079963 | 15.0 |
| 193 | 11v-03-OhfusettoPentBipyr— fe2c4— 1014 | -3196.079951 | 15.1 |
| 194 | 11v-04-Icos-1vx— fe2c4— 1619           | -3196.079943 | 15.1 |
| 195 | 11v-04-Icos-1vx— fe2c4— 1841           | -3196.079892 | 15.1 |
| 196 | 11v-04-Icos-1vx— fe2c4— 1963           | -3196.07987  | 15.1 |
| 197 | 11v-04-Icos-1vx— fe2c4— 2827           | -3196.07987  | 15.1 |
| 198 | 11v-04-Icos-1vx— fe2c4— 2132           | -3196.079851 | 15.1 |
| 199 | 11v-04-Icos-1vx— fe2c4— 1943           | -3196.079846 | 15.1 |
| 200 | 11v-04-Icos-1vx— fe2c4— 2121           | -3196.079846 | 15.1 |
| 201 | 11v-04-Icos-1vx— fe2c4— 1958           | -3196.079844 | 15.1 |



|     |                                      |              |      |
|-----|--------------------------------------|--------------|------|
| 202 | 11v-04-Icos-1vx—fe2c4—1495           | -3196.079832 | 15.1 |
| 203 | 11v-04-Icos-1vx—fe2c4—1909           | -3196.079811 | 15.1 |
| 204 | 11v-04-Icos-1vx—fe2c4—2877           | -3196.079803 | 15.2 |
| 205 | 11v-04-Icos-1vx—fe2c4—1724           | -3196.079772 | 15.2 |
| 206 | 11v-04-Icos-1vx—fe2c4—1592           | -3196.079721 | 15.2 |
| 207 | 11v-04-Icos-1vx—fe2c4—1646           | -3196.079671 | 15.2 |
| 208 | 11v-04-Icos-1vx—fe2c4—1520           | -3196.079658 | 15.2 |
| 209 | 11v-04-Icos-1vx—fe2c4—1539           | -3196.079658 | 15.2 |
| 210 | 11v-04-Icos-1vx—fe2c4—1711           | -3196.079653 | 15.2 |
| 211 | 11v-04-Icos-1vx—fe2c4—1750           | -3196.079562 | 15.3 |
| 212 | 11v-04-Icos-1vx—fe2c4—1767           | -3196.079562 | 15.3 |
| 213 | 11v-04-Icos-1vx—fe2c4—1788           | -3196.079562 | 15.3 |
| 214 | 11v-04-Icos-1vx—fe2c4—2131           | -3196.07956  | 15.3 |
| 215 | 11v-04-Icos-1vx—fe2c4—2155           | -3196.079556 | 15.3 |
| 216 | 11v-04-Icos-1vx—fe2c4—2432           | -3196.079519 | 15.3 |
| 217 | 11v-04-Icos-1vx—fe2c4—2535           | -3196.079518 | 15.3 |
| 218 | 11v-04-Icos-1vx—fe2c4—1669           | -3196.079517 | 15.3 |
| 219 | 11v-04-Icos-1vx—fe2c4—1684           | -3196.079517 | 15.3 |
| 220 | 11v-04-Icos-1vx—fe2c4—2625           | -3196.079507 | 15.3 |
| 221 | 11v-04-Icos-1vx—fe2c4—2648           | -3196.079505 | 15.3 |
| 222 | 11v-04-Icos-1vx—fe2c4—2526           | -3196.079435 | 15.4 |
| 223 | 11v-04-Icos-1vx—fe2c4—2396           | -3196.079433 | 15.4 |
| 224 | 11v-04-Icos-1vx—fe2c4—2464           | -3196.079419 | 15.4 |
| 225 | 11v-04-Icos-1vx—fe2c4—2467           | -3196.079419 | 15.4 |
| 226 | 11v-04-Icos-1vx—fe2c4—2838           | -3196.079411 | 15.4 |
| 227 | 11v-04-Icos-1vx—fe2c4—2416           | -3196.079409 | 15.4 |
| 228 | 11v-04-Icos-1vx—fe2c4—2833           | -3196.079363 | 15.4 |
| 229 | 11v-04-Icos-1vx—fe2c4—2735           | -3196.079356 | 15.4 |
| 230 | 11v-01-PentaCapTrPr—fe2c4—113        | -3196.079307 | 15.5 |
| 231 | 11v-03-OhfusettoPentBipyr—fe2c4—1282 | -3196.079256 | 15.5 |
| 232 | 11v-04-Icos-1vx—fe2c4—2521           | -3196.07917  | 15.5 |
| 233 | 11v-04-Icos-1vx—fe2c4—2754           | -3196.079164 | 15.6 |
| 234 | 11v-04-Icos-1vx—fe2c4—2534           | -3196.079158 | 15.6 |
| 235 | 11v-04-Icos-1vx—fe2c4—2679           | -3196.079154 | 15.6 |
| 236 | 11v-04-Icos-1vx—fe2c4—2670           | -3196.079131 | 15.6 |
| 237 | 11v-04-Icos-1vx—fe2c4—2738           | -3196.07913  | 15.6 |
| 238 | 11v-04-Icos-1vx—fe2c4—1938           | -3196.079117 | 15.6 |
| 239 | 11v-04-Icos-1vx—fe2c4—1836           | -3196.079098 | 15.6 |
| 240 | 11v-04-Icos-1vx—fe2c4—1854           | -3196.07908  | 15.6 |
| 241 | 11v-04-Icos-1vx—fe2c4—1872           | -3196.07908  | 15.6 |
| 242 | 11v-01-PentaCapTrPr—fe2c4—111        | -3196.079014 | 15.6 |
| 243 | 11v-01-PentaCapTrPr—fe2c4—123        | -3196.079014 | 15.6 |
| 244 | 11v-01-PentaCapTrPr—fe2c4—144        | -3196.079014 | 15.6 |
| 245 | 11v-04-Icos-1vx—fe2c4—1873           | -3196.078941 | 15.7 |
| 246 | 11v-03-OhfusettoPentBipyr—fe2c4—903  | -3196.078936 | 15.7 |
| 247 | 11v-04-Icos-1vx—fe2c4—1837           | -3196.078889 | 15.7 |
| 248 | 11v-04-Icos-1vx—fe2c4—1860           | -3196.078886 | 15.7 |
| 249 | 11v-04-Icos-1vx—fe2c4—1890           | -3196.078882 | 15.7 |
| 250 | 11v-03-OhfusettoPentBipyr—fe2c4—722  | -3196.078725 | 15.8 |
| 251 | 11v-03-OhfusettoPentBipyr—fe2c4—1203 | -3196.078634 | 15.9 |
| 252 | 11v-01-PentaCapTrPr—fe2c4—182        | -3196.078512 | 16.0 |

|     |                                      |              |      |
|-----|--------------------------------------|--------------|------|
| 253 | 11v-02-TricapCubeA—fe2c4—223         | -3196.078422 | 16.0 |
| 254 | 11v-03-OhfusettoPentBipyr—fe2c4—460  | -3196.075252 | 18.0 |
| 255 | 11v-04-Icos-1vx—fe2c4—2529           | -3196.075156 | 18.1 |
| 256 | 11v-04-Icos-1vx—fe2c4—1421           | -3196.075133 | 18.1 |
| 257 | 11v-03-OhfusettoPentBipyr—fe2c4—539  | -3196.075088 | 18.1 |
| 258 | 11v-03-OhfusettoPentBipyr—fe2c4—565  | -3196.075062 | 18.1 |
| 259 | 11v-03-OhfusettoPentBipyr—fe2c4—559  | -3196.07506  | 18.1 |
| 260 | 11v-03-OhfusettoPentBipyr—fe2c4—509  | -3196.075058 | 18.1 |
| 261 | 11v-03-OhfusettoPentBipyr—fe2c4—499  | -3196.075056 | 18.1 |
| 262 | 11v-04-Icos-1vx—fe2c4—1903           | -3196.074972 | 18.2 |
| 263 | 11v-04-Icos-1vx—fe2c4—1942           | -3196.07497  | 18.2 |
| 264 | 11v-04-Icos-1vx—fe2c4—1840           | -3196.074958 | 18.2 |
| 265 | 11v-04-Icos-1vx—fe2c4—1957           | -3196.074951 | 18.2 |
| 266 | 11v-04-Icos-1vx—fe2c4—1917           | -3196.074943 | 18.2 |
| 267 | 11v-04-Icos-1vx—fe2c4—1722           | -3196.074931 | 18.2 |
| 268 | 11v-04-Icos-1vx—fe2c4—1573           | -3196.074739 | 18.3 |
| 269 | 11v-04-Icos-1vx—fe2c4—1580           | -3196.074739 | 18.3 |
| 270 | 11v-04-Icos-1vx—fe2c4—1900           | -3196.074722 | 18.3 |
| 271 | 11v-03-OhfusettoPentBipyr—fe2c4—1305 | -3196.074533 | 18.5 |
| 272 | 11v-01-PentaCapTrPr—fe2c4—186        | -3196.074447 | 18.5 |
| 273 | 11v-02-TricapCubeA—fe2c4—206         | -3196.074422 | 18.5 |
| 274 | 11v-04-Icos-1vx—fe2c4—1638           | -3196.074288 | 18.6 |
| 275 | 11v-04-Icos-1vx—fe2c4—1657           | -3196.074288 | 18.6 |
| 276 | 11v-03-OhfusettoPentBipyr—fe2c4—1321 | -3196.074194 | 18.7 |
| 277 | 11v-03-OhfusettoPentBipyr—fe2c4—1339 | -3196.074193 | 18.7 |
| 278 | 11v-04-Icos-1vx—fe2c4—1928           | -3196.074141 | 18.7 |
| 279 | 11v-04-Icos-1vx—fe2c4—1946           | -3196.07414  | 18.7 |
| 280 | 11v-04-Icos-1vx—fe2c4—1962           | -3196.074137 | 18.7 |
| 281 | 11v-04-Icos-1vx—fe2c4—1844           | -3196.074135 | 18.7 |
| 282 | 11v-03-OhfusettoPentBipyr—fe2c4—1050 | -3196.073873 | 18.9 |
| 283 | 11v-03-OhfusettoPentBipyr—fe2c4—978  | -3196.073873 | 18.9 |
| 284 | 11v-03-OhfusettoPentBipyr—fe2c4—990  | -3196.073873 | 18.9 |
| 285 | 11v-02-TricapCube—fe2c4—236          | -3196.072875 | 19.5 |
| 286 | 11v-03-OhfusettoPentBipyr—fe2c4—564  | -3196.072797 | 19.5 |
| 287 | 11v-04-Icos-1vx—fe2c4—1423           | -3196.072772 | 19.6 |
| 288 | 11v-04-Icos-1vx—fe2c4—1530           | -3196.072768 | 19.6 |
| 289 | 11v-04-Icos-1vx—fe2c4—1518           | -3196.072767 | 19.6 |
| 290 | 11v-04-Icos-1vx—fe2c4—1435           | -3196.072765 | 19.6 |
| 291 | 11v-04-Icos-1vx—fe2c4—1440           | -3196.072765 | 19.6 |
| 292 | 11v-04-Icos-1vx—fe2c4—1449           | -3196.072763 | 19.6 |
| 293 | 11v-04-Icos-1vx—fe2c4—1584           | -3196.072763 | 19.6 |
| 294 | 11v-04-Icos-1vx—fe2c4—1611           | -3196.072763 | 19.6 |
| 295 | 11v-04-Icos-1vx—fe2c4—1561           | -3196.072762 | 19.6 |
| 296 | 11v-04-Icos-1vx—fe2c4—1516           | -3196.072695 | 19.6 |
| 297 | 11v-04-Icos-1vx—fe2c4—1546           | -3196.072695 | 19.6 |
| 298 | 11v-03-OhfusettoPentBipyr—fe2c4—474  | -3196.07256  | 19.7 |
| 299 | 11v-03-OhfusettoPentBipyr—fe2c4—516  | -3196.07256  | 19.7 |
| 300 | 11v-04-Icos-1vx—fe2c4—1812           | -3196.07255  | 19.7 |
| 301 | 11v-04-Icos-1vx—fe2c4—1751           | -3196.072526 | 19.7 |
| 302 | 11v-04-Icos-1vx—fe2c4—1782           | -3196.072526 | 19.7 |
| 303 | 11v-01-PentaCapTrPr—fe2c4—104        | -3196.072142 | 20.0 |

|     |                                     |              |      |
|-----|-------------------------------------|--------------|------|
| 304 | 11v-04-Icos-1vx—fe2c4—1541          | -3196.072114 | 20.0 |
| 305 | 11v-04-Icos-1vx—fe2c4—1469          | -3196.072113 | 20.0 |
| 306 | 11v-04-Icos-1vx—fe2c4—1523          | -3196.072112 | 20.0 |
| 307 | 11v-04-Icos-1vx—fe2c4—1467          | -3196.072064 | 20.0 |
| 308 | 11v-04-Icos-1vx—fe2c4—1521          | -3196.072062 | 20.0 |
| 309 | 11v-04-Icos-1vx—fe2c4—1749          | -3196.072038 | 20.0 |
| 310 | 11v-04-Icos-1vx—fe2c4—1761          | -3196.072038 | 20.0 |
| 311 | 11v-04-Icos-1vx—fe2c4—1779          | -3196.072038 | 20.0 |
| 312 | 11v-03-OhfusettoPentBipyr—fe2c4—739 | -3196.072026 | 20.0 |
| 313 | 11v-03-OhfusettoPentBipyr—fe2c4—781 | -3196.072022 | 20.0 |
| 314 | 11v-04-Icos-1vx—fe2c4—1405          | -3196.071996 | 20.0 |
| 315 | 11v-03-OhfusettoPentBipyr—fe2c4—665 | -3196.071987 | 20.1 |
| 316 | 11v-04-Icos-1vx—fe2c4—1414          | -3196.071985 | 20.1 |
| 317 | 11v-03-OhfusettoPentBipyr—fe2c4—554 | -3196.071968 | 20.1 |
| 318 | 11v-03-OhfusettoPentBipyr—fe2c4—518 | -3196.071966 | 20.1 |
| 319 | 11v-03-OhfusettoPentBipyr—fe2c4—524 | -3196.071966 | 20.1 |
| 320 | 11v-03-OhfusettoPentBipyr—fe2c4—469 | -3196.071965 | 20.1 |
| 321 | 11v-03-OhfusettoPentBipyr—fe2c4—451 | -3196.071963 | 20.1 |
| 322 | 11v-03-OhfusettoPentBipyr—fe2c4—475 | -3196.071962 | 20.1 |
| 323 | 11v-02-TricapCube—fe2c4—247         | -3196.07195  | 20.1 |
| 324 | 11v-02-TricapCube—fe2c4—285         | -3196.07195  | 20.1 |
| 325 | 11v-02-TricapCube—fe2c4—303         | -3196.07195  | 20.1 |
| 326 | 11v-04-Icos-1vx—fe2c4—1764          | -3196.071882 | 20.1 |
| 327 | 11v-04-Icos-1vx—fe2c4—1768          | -3196.071797 | 20.2 |
| 328 | 11v-04-Icos-1vx—fe2c4—1774          | -3196.071797 | 20.2 |
| 329 | 11v-04-Icos-1vx—fe2c4—1739          | -3196.071788 | 20.2 |
| 330 | 11v-04-Icos-1vx—fe2c4—1780          | -3196.071564 | 20.3 |
| 331 | 11v-03-OhfusettoPentBipyr—fe2c4—636 | -3196.071179 | 20.6 |
| 332 | 11v-04-Icos-1vx—fe2c4—2896          | -3196.071078 | 20.6 |
| 333 | 11v-04-Icos-1vx—fe2c4—1773          | -3196.070963 | 20.7 |
| 334 | 11v-04-Icos-1vx—fe2c4—1794          | -3196.070963 | 20.7 |
| 335 | 11v-04-Icos-1vx—fe2c4—2593          | -3196.070939 | 20.7 |
| 336 | 11v-04-Icos-1vx—fe2c4—1753          | -3196.070931 | 20.7 |
| 337 | 11v-04-Icos-1vx—fe2c4—1765          | -3196.070931 | 20.7 |
| 338 | 11v-04-Icos-1vx—fe2c4—1587          | -3196.070924 | 20.7 |
| 339 | 11v-04-Icos-1vx—fe2c4—1605          | -3196.070911 | 20.7 |
| 340 | 11v-04-Icos-1vx—fe2c4—3127          | -3196.07091  | 20.7 |
| 341 | 11v-04-Icos-1vx—fe2c4—3139          | -3196.070897 | 20.7 |
| 342 | 11v-04-Icos-1vx—fe2c4—2203          | -3196.070895 | 20.7 |
| 343 | 11v-04-Icos-1vx—fe2c4—3180          | -3196.070891 | 20.7 |
| 344 | 11v-04-Icos-1vx—fe2c4—2588          | -3196.070811 | 20.8 |
| 345 | 11v-04-Icos-1vx—fe2c4—2630          | -3196.070745 | 20.8 |
| 346 | 11v-04-Icos-1vx—fe2c4—2645          | -3196.070745 | 20.8 |
| 347 | 11v-04-Icos-1vx—fe2c4—2702          | -3196.070713 | 20.9 |
| 348 | 11v-02-TricapCube—fe2c4—291         | -3196.070667 | 20.9 |
| 349 | 11v-02-TricapCube—fe2c4—304         | -3196.070667 | 20.9 |
| 350 | 11v-04-Icos-1vx—fe2c4—2081          | -3196.070665 | 20.9 |
| 351 | 11v-04-Icos-1vx—fe2c4—2542          | -3196.070634 | 20.9 |
| 352 | 11v-02-TricapCube—fe2c4—253         | -3196.070568 | 20.9 |
| 353 | 11v-02-TricapCube—fe2c4—284         | -3196.070568 | 20.9 |
| 354 | 11v-02-TricapCube—fe2c4—298         | -3196.070568 | 20.9 |

|     |                                      |              |      |
|-----|--------------------------------------|--------------|------|
| 355 | 11v-04-Icos-1vx—fe2c4—2502           | -3196.070509 | 21.0 |
| 356 | 11v-02-TricapCube—fe2c4—297          | -3196.070436 | 21.0 |
| 357 | 11v-02-TricapCube—fe2c4—302          | -3196.070436 | 21.0 |
| 358 | 11v-02-TricapCubeA—fe2c4—224         | -3196.070213 | 21.2 |
| 359 | 11v-04-Icos-1vx—fe2c4—1857           | -3196.070208 | 21.2 |
| 360 | 11v-04-Icos-1vx—fe2c4—1941           | -3196.070204 | 21.2 |
| 361 | 11v-04-Icos-1vx—fe2c4—1956           | -3196.070203 | 21.2 |
| 362 | 11v-01-PentaCapTrPr—fe2c4—177        | -3196.070195 | 21.2 |
| 363 | 11v-04-Icos-1vx—fe2c4—1628           | -3196.070097 | 21.2 |
| 364 | 11v-03-OhfusettoPentBipyr—fe2c4—876  | -3196.069952 | 21.3 |
| 365 | 11v-04-Icos-1vx—fe2c4—3257           | -3196.069257 | 21.8 |
| 366 | 11v-04-Icos-1vx—fe2c4—2878           | -3196.068921 | 22.0 |
| 367 | 11v-04-Icos-1vx—fe2c4—2239           | -3196.068717 | 22.1 |
| 368 | 11v-04-Icos-1vx—fe2c4—2908           | -3196.068159 | 22.5 |
| 369 | 11v-02-TricapCube—fe2c4—305          | -3196.068103 | 22.5 |
| 370 | 11v-04-Icos-1vx—fe2c4—2928           | -3196.068077 | 22.5 |
| 371 | 11v-04-Icos-1vx—fe2c4—2910           | -3196.068068 | 22.5 |
| 372 | 11v-04-Icos-1vx—fe2c4—3066           | -3196.06806  | 22.5 |
| 373 | 11v-04-Icos-1vx—fe2c4—2922           | -3196.068058 | 22.5 |
| 374 | 11v-04-Icos-1vx—fe2c4—2964           | -3196.068056 | 22.5 |
| 375 | 11v-04-Icos-1vx—fe2c4—2433           | -3196.068051 | 22.5 |
| 376 | 11v-04-Icos-1vx—fe2c4—2898           | -3196.06804  | 22.5 |
| 377 | 11v-04-Icos-1vx—fe2c4—2397           | -3196.068036 | 22.5 |
| 378 | 11v-04-Icos-1vx—fe2c4—2496           | -3196.067995 | 22.6 |
| 379 | 11v-04-Icos-1vx—fe2c4—2273           | -3196.067915 | 22.6 |
| 380 | 11v-02-TricapCube—fe2c4—266          | -3196.067897 | 22.6 |
| 381 | 11v-02-TricapCube—fe2c4—280          | -3196.067897 | 22.6 |
| 382 | 11v-04-Icos-1vx—fe2c4—3269           | -3196.067825 | 22.7 |
| 383 | 11v-04-Icos-1vx—fe2c4—3263           | -3196.067772 | 22.7 |
| 384 | 11v-04-Icos-1vx—fe2c4—3004           | -3196.067693 | 22.7 |
| 385 | 11v-04-Icos-1vx—fe2c4—2150           | -3196.067622 | 22.8 |
| 386 | 11v-04-Icos-1vx—fe2c4—1737           | -3196.067118 | 23.1 |
| 387 | 11v-04-Icos-1vx—fe2c4—1742           | -3196.067108 | 23.1 |
| 388 | 11v-02-TricapCube—fe2c4—265          | -3196.067076 | 23.1 |
| 389 | 11v-02-TricapCube—fe2c4—283          | -3196.067076 | 23.1 |
| 390 | 11v-02-TricapCube—fe2c4—316          | -3196.067076 | 23.1 |
| 391 | 11v-02-TricapCube—fe2c4—309          | -3196.067022 | 23.2 |
| 392 | 11v-04-Icos-1vx—fe2c4—1808           | -3196.066881 | 23.3 |
| 393 | 11v-03-OhfusettoPentBipyr—fe2c4—1089 | -3196.066795 | 23.3 |
| 394 | 11v-03-OhfusettoPentBipyr—fe2c4—1123 | -3196.066795 | 23.3 |
| 395 | 11v-03-OhfusettoPentBipyr—fe2c4—1131 | -3196.066795 | 23.3 |
| 396 | 11v-03-OhfusettoPentBipyr—fe2c4—1137 | -3196.066795 | 23.3 |
| 397 | 11v-03-OhfusettoPentBipyr—fe2c4—1141 | -3196.066795 | 23.3 |
| 398 | 11v-04-Icos-1vx—fe2c4—3030           | -3196.066697 | 23.4 |
| 399 | 11v-04-Icos-1vx—fe2c4—3149           | -3196.066691 | 23.4 |
| 400 | 11v-04-Icos-1vx—fe2c4—3155           | -3196.066688 | 23.4 |
| 401 | 11v-03-OhfusettoPentBipyr—fe2c4—1291 | -3196.066681 | 23.4 |
| 402 | 11v-03-OhfusettoPentBipyr—fe2c4—1286 | -3196.066678 | 23.4 |
| 403 | 11v-01-PentaCapTrPr—fe2c4—171        | -3196.066646 | 23.4 |
| 404 | 11v-01-PentaCapTrPr—fe2c4—127        | -3196.066645 | 23.4 |
| 405 | 11v-01-PentaCapTrPr—fe2c4—173        | -3196.066641 | 23.4 |

|     |                                      |              |      |
|-----|--------------------------------------|--------------|------|
| 406 | 11v-01-PentaCapTrPr—fe2c4—149        | -3196.066551 | 23.5 |
| 407 | 11v-02-TricapCube—fe2c4—322          | -3196.066543 | 23.5 |
| 408 | 11v-03-OhfusettoPentBipyr—fe2c4—976  | -3196.066458 | 23.5 |
| 409 | 11v-03-OhfusettoPentBipyr—fe2c4—988  | -3196.066458 | 23.5 |
| 410 | 11v-03-OhfusettoPentBipyr—fe2c4—1280 | -3196.066386 | 23.6 |
| 411 | 11v-04-Icos-1vx—fe2c4—2129           | -3196.066383 | 23.6 |
| 412 | 11v-04-Icos-1vx—fe2c4—2665           | -3196.066206 | 23.7 |
| 413 | 11v-04-Icos-1vx—fe2c4—2720           | -3196.066198 | 23.7 |
| 414 | 11v-04-Icos-1vx—fe2c4—2659           | -3196.066191 | 23.7 |
| 415 | 11v-04-Icos-1vx—fe2c4—1698           | -3196.065913 | 23.9 |
| 416 | 11v-04-Icos-1vx—fe2c4—2652           | -3196.065783 | 23.9 |
| 417 | 11v-02-TricapCube—fe2c4—320          | -3196.065728 | 24.0 |
| 418 | 11v-04-Icos-1vx—fe2c4—2949           | -3196.065622 | 24.0 |
| 419 | 11v-04-Icos-1vx—fe2c4—3249           | -3196.065577 | 24.1 |
| 420 | 11v-04-Icos-1vx—fe2c4—3266           | -3196.065531 | 24.1 |
| 421 | 11v-04-Icos-1vx—fe2c4—2640           | -3196.065472 | 24.1 |
| 422 | 11v-01-PentaCapTrPr—fe2c4—170        | -3196.065456 | 24.2 |
| 423 | 11v-04-Icos-1vx—fe2c4—3147           | -3196.065321 | 24.2 |
| 424 | 11v-03-OhfusettoPentBipyr—fe2c4—1154 | -3196.064863 | 24.5 |
| 425 | 11v-04-Icos-1vx—fe2c4—2958           | -3196.064828 | 24.5 |
| 426 | 11v-04-Icos-1vx—fe2c4—2626           | -3196.064814 | 24.6 |
| 427 | 11v-04-Icos-1vx—fe2c4—2523           | -3196.064691 | 24.6 |
| 428 | 11v-03-OhfusettoPentBipyr—fe2c4—899  | -3196.064644 | 24.7 |
| 429 | 11v-04-Icos-1vx—fe2c4—2516           | -3196.064638 | 24.7 |
| 430 | 11v-03-OhfusettoPentBipyr—fe2c4—786  | -3196.064625 | 24.7 |
| 431 | 11v-04-Icos-1vx—fe2c4—2266           | -3196.064624 | 24.7 |
| 432 | 11v-03-OhfusettoPentBipyr—fe2c4—1205 | -3196.064597 | 24.7 |
| 433 | 11v-02-TricapCube—fe2c4—272          | -3196.064538 | 24.7 |
| 434 | 11v-02-TricapCube—fe2c4—278          | -3196.064538 | 24.7 |
| 435 | 11v-04-Icos-1vx—fe2c4—2916           | -3196.064515 | 24.7 |
| 436 | 11v-04-Icos-1vx—fe2c4—3054           | -3196.064505 | 24.8 |
| 437 | 11v-03-OhfusettoPentBipyr—fe2c4—1140 | -3196.064446 | 24.8 |
| 438 | 11v-03-OhfusettoPentBipyr—fe2c4—982  | -3196.064417 | 24.8 |
| 439 | 11v-03-OhfusettoPentBipyr—fe2c4—1035 | -3196.064414 | 24.8 |
| 440 | 11v-04-Icos-1vx—fe2c4—2133           | -3196.064318 | 24.9 |
| 441 | 11v-04-Icos-1vx—fe2c4—2145           | -3196.064318 | 24.9 |
| 442 | 11v-04-Icos-1vx—fe2c4—2511           | -3196.064294 | 24.9 |
| 443 | 11v-01-PentaCapTrPr—fe2c4—116        | -3196.064231 | 24.9 |
| 444 | 11v-04-Icos-1vx—fe2c4—2586           | -3196.064151 | 25.0 |
| 445 | 11v-04-Icos-1vx—fe2c4—2658           | -3196.06411  | 25.0 |
| 446 | 11v-04-Icos-1vx—fe2c4—2677           | -3196.064108 | 25.0 |
| 447 | 11v-04-Icos-1vx—fe2c4—2708           | -3196.064105 | 25.0 |
| 448 | 11v-03-OhfusettoPentBipyr—fe2c4—1067 | -3196.064069 | 25.0 |
| 449 | 11v-04-Icos-1vx—fe2c4—2636           | -3196.064067 | 25.0 |
| 450 | 11v-04-Icos-1vx—fe2c4—2623           | -3196.064066 | 25.0 |
| 451 | 11v-03-OhfusettoPentBipyr—fe2c4—1094 | -3196.064058 | 25.0 |
| 452 | 11v-01-PentaCapTrPr—fe2c4—59         | -3196.064053 | 25.0 |
| 453 | 11v-01-PentaCapTrPr—fe2c4—65         | -3196.064042 | 25.0 |
| 454 | 11v-03-OhfusettoPentBipyr—fe2c4—1133 | -3196.063942 | 25.1 |
| 455 | 11v-03-OhfusettoPentBipyr—fe2c4—1114 | -3196.06394  | 25.1 |
| 456 | 11v-03-OhfusettoPentBipyr—fe2c4—1100 | -3196.063937 | 25.1 |

|     |                                      |              |      |
|-----|--------------------------------------|--------------|------|
| 457 | 11v-01-PentaCapTrPr—fe2c4—169        | -3196.063775 | 25.2 |
| 458 | 11v-02-TricapCube—fe2c4—268          | -3196.063409 | 25.4 |
| 459 | 11v-02-TricapCube—fe2c4—274          | -3196.063409 | 25.4 |
| 460 | 11v-04-Icos-1vx—fe2c4—2757           | -3196.063374 | 25.5 |
| 461 | 11v-03-OhfusettoPentBipyr—fe2c4—1169 | -3196.063189 | 25.6 |
| 462 | 11v-03-OhfusettoPentBipyr—fe2c4—1211 | -3196.063183 | 25.6 |
| 463 | 11v-01-PentaCapTrPr—fe2c4—53         | -3196.063064 | 25.7 |
| 464 | 11v-01-PentaCapTrPr—fe2c4—41         | -3196.063063 | 25.7 |
| 465 | 11v-01-PentaCapTrPr—fe2c4—66         | -3196.06283  | 25.8 |
| 466 | 11v-01-PentaCapTrPr—fe2c4—60         | -3196.062798 | 25.8 |
| 467 | 11v-01-PentaCapTrPr—fe2c4—6          | -3196.062798 | 25.8 |
| 468 | 11v-01-PentaCapTrPr—fe2c4—30         | -3196.062708 | 25.9 |
| 469 | 11v-04-Icos-1vx—fe2c4—3191           | -3196.062628 | 25.9 |
| 470 | 11v-04-Icos-1vx—fe2c4—3209           | -3196.062613 | 25.9 |
| 471 | 11v-04-Icos-1vx—fe2c4—2469           | -3196.0626   | 25.9 |
| 472 | 11v-04-Icos-1vx—fe2c4—2480           | -3196.0626   | 25.9 |
| 473 | 11v-04-Icos-1vx—fe2c4—2934           | -3196.062536 | 26.0 |
| 474 | 11v-04-Icos-1vx—fe2c4—2994           | -3196.062517 | 26.0 |
| 475 | 11v-04-Icos-1vx—fe2c4—2966           | -3196.062516 | 26.0 |
| 476 | 11v-04-Icos-1vx—fe2c4—2912           | -3196.062515 | 26.0 |
| 477 | 11v-04-Icos-1vx—fe2c4—2900           | -3196.062503 | 26.0 |
| 478 | 11v-04-Icos-1vx—fe2c4—2612           | -3196.062411 | 26.1 |
| 479 | 11v-04-Icos-1vx—fe2c4—2589           | -3196.062395 | 26.1 |
| 480 | 11v-04-Icos-1vx—fe2c4—2402           | -3196.062367 | 26.1 |
| 481 | 11v-04-Icos-1vx—fe2c4—2413           | -3196.062362 | 26.1 |
| 482 | 11v-04-Icos-1vx—fe2c4—2383           | -3196.06236  | 26.1 |
| 483 | 11v-04-Icos-1vx—fe2c4—2548           | -3196.062317 | 26.1 |
| 484 | 11v-04-Icos-1vx—fe2c4—2475           | -3196.062304 | 26.1 |
| 485 | 11v-04-Icos-1vx—fe2c4—2481           | -3196.062304 | 26.1 |
| 486 | 11v-03-OhfusettoPentBipyr—fe2c4—1043 | -3196.062255 | 26.2 |
| 487 | 11v-03-OhfusettoPentBipyr—fe2c4—1049 | -3196.062211 | 26.2 |
| 488 | 11v-02-TricapCube—fe2c4—317          | -3196.062123 | 26.2 |
| 489 | 11v-04-Icos-1vx—fe2c4—3197           | -3196.062096 | 26.3 |
| 490 | 11v-04-Icos-1vx—fe2c4—3185           | -3196.062094 | 26.3 |
| 491 | 11v-01-PentaCapTrPr—fe2c4—77         | -3196.062088 | 26.3 |
| 492 | 11v-04-Icos-1vx—fe2c4—2581           | -3196.062086 | 26.3 |
| 493 | 11v-04-Icos-1vx—fe2c4—3173           | -3196.062078 | 26.3 |
| 494 | 11v-04-Icos-1vx—fe2c4—3215           | -3196.06206  | 26.3 |
| 495 | 11v-04-Icos-1vx—fe2c4—2508           | -3196.062055 | 26.3 |
| 496 | 11v-04-Icos-1vx—fe2c4—2390           | -3196.061929 | 26.4 |
| 497 | 11v-04-Icos-1vx—fe2c4—1688           | -3196.061895 | 26.4 |
| 498 | 11v-04-Icos-1vx—fe2c4—1694           | -3196.061895 | 26.4 |
| 499 | 11v-04-Icos-1vx—fe2c4—1710           | -3196.061888 | 26.4 |
| 500 | 11v-01-PentaCapTrPr—fe2c4—11         | -3196.061868 | 26.4 |
| 501 | 11v-04-Icos-1vx—fe2c4—1363           | -3196.061841 | 26.4 |
| 502 | 11v-04-Icos-1vx—fe2c4—1369           | -3196.061841 | 26.4 |
| 503 | 11v-04-Icos-1vx—fe2c4—1381           | -3196.061841 | 26.4 |
| 504 | 11v-04-Icos-1vx—fe2c4—1389           | -3196.061841 | 26.4 |
| 505 | 11v-04-Icos-1vx—fe2c4—1687           | -3196.061786 | 26.5 |
| 506 | 11v-04-Icos-1vx—fe2c4—1693           | -3196.061786 | 26.5 |
| 507 | 11v-01-PentaCapTrPr—fe2c4—133        | -3196.061782 | 26.5 |

|     |                                      |              |      |
|-----|--------------------------------------|--------------|------|
| 508 | 11v-01-PentaCapTrPr—fe2c4—139        | -3196.061782 | 26.5 |
| 509 | 11v-04-Icos-1vx—fe2c4—1391           | -3196.061739 | 26.5 |
| 510 | 11v-04-Icos-1vx—fe2c4—1396           | -3196.061734 | 26.5 |
| 511 | 11v-04-Icos-1vx—fe2c4—1690           | -3196.061699 | 26.5 |
| 512 | 11v-03-OhfusettoPentBipyr—fe2c4—572  | -3196.061691 | 26.5 |
| 513 | 11v-04-Icos-1vx—fe2c4—1896           | -3196.061675 | 26.5 |
| 514 | 11v-01-PentaCapTrPr—fe2c4—43         | -3196.061672 | 26.5 |
| 515 | 11v-04-Icos-1vx—fe2c4—1866           | -3196.061671 | 26.5 |
| 516 | 11v-03-OhfusettoPentBipyr—fe2c4—790  | -3196.061529 | 26.6 |
| 517 | 11v-03-OhfusettoPentBipyr—fe2c4—1294 | -3196.061501 | 26.6 |
| 518 | 11v-03-OhfusettoPentBipyr—fe2c4—1270 | -3196.061474 | 26.7 |
| 519 | 11v-04-Icos-1vx—fe2c4—2446           | -3196.06134  | 26.7 |
| 520 | 11v-04-Icos-1vx—fe2c4—3052           | -3196.061291 | 26.8 |
| 521 | 11v-01-PentaCapTrPr—fe2c4—81         | -3196.061287 | 26.8 |
| 522 | 11v-04-Icos-1vx—fe2c4—2405           | -3196.061257 | 26.8 |
| 523 | 11v-04-Icos-1vx—fe2c4—1807           | -3196.061256 | 26.8 |
| 524 | 11v-04-Icos-1vx—fe2c4—2909           | -3196.061239 | 26.8 |
| 525 | 11v-04-Icos-1vx—fe2c4—1388           | -3196.061233 | 26.8 |
| 526 | 11v-01-PentaCapTrPr—fe2c4—55         | -3196.061229 | 26.8 |
| 527 | 11v-04-Icos-1vx—fe2c4—2493           | -3196.061198 | 26.8 |
| 528 | 11v-04-Icos-1vx—fe2c4—2510           | -3196.06118  | 26.8 |
| 529 | 11v-02-TricapCube—fe2c4—287          | -3196.061154 | 26.9 |
| 530 | 11v-04-Icos-1vx—fe2c4—2952           | -3196.061153 | 26.9 |
| 531 | 11v-04-Icos-1vx—fe2c4—2967           | -3196.061149 | 26.9 |
| 532 | 11v-04-Icos-1vx—fe2c4—3060           | -3196.061147 | 26.9 |
| 533 | 11v-02-TricapCube—fe2c4—279          | -3196.061143 | 26.9 |
| 534 | 11v-04-Icos-1vx—fe2c4—2901           | -3196.06114  | 26.9 |
| 535 | 11v-04-Icos-1vx—fe2c4—2657           | -3196.061136 | 26.9 |
| 536 | 11v-04-Icos-1vx—fe2c4—2913           | -3196.061136 | 26.9 |
| 537 | 11v-02-TricapCube—fe2c4—293          | -3196.061121 | 26.9 |
| 538 | 11v-04-Icos-1vx—fe2c4—2447           | -3196.061076 | 26.9 |
| 539 | 11v-01-PentaCapTrPr—fe2c4—27         | -3196.061066 | 26.9 |
| 540 | 11v-04-Icos-1vx—fe2c4—2271           | -3196.061016 | 26.9 |
| 541 | 11v-04-Icos-1vx—fe2c4—2707           | -3196.060988 | 27.0 |
| 542 | 11v-04-Icos-1vx—fe2c4—2737           | -3196.060969 | 27.0 |
| 543 | 11v-01-PentaCapTrPr—fe2c4—54         | -3196.06096  | 27.0 |
| 544 | 11v-04-Icos-1vx—fe2c4—2420           | -3196.060957 | 27.0 |
| 545 | 11v-04-Icos-1vx—fe2c4—2412           | -3196.060945 | 27.0 |
| 546 | 11v-04-Icos-1vx—fe2c4—2382           | -3196.060939 | 27.0 |
| 547 | 11v-04-Icos-1vx—fe2c4—2557           | -3196.060904 | 27.0 |
| 548 | 11v-03-OhfusettoPentBipyr—fe2c4—1292 | -3196.060885 | 27.0 |
| 549 | 11v-04-Icos-1vx—fe2c4—1617           | -3196.060878 | 27.0 |
| 550 | 11v-04-Icos-1vx—fe2c4—2249           | -3196.060862 | 27.0 |
| 551 | 11v-04-Icos-1vx—fe2c4—2712           | -3196.060839 | 27.1 |
| 552 | 11v-04-Icos-1vx—fe2c4—2661           | -3196.060804 | 27.1 |
| 553 | 11v-03-OhfusettoPentBipyr—fe2c4—453  | -3196.060803 | 27.1 |
| 554 | 11v-04-Icos-1vx—fe2c4—2714           | -3196.060802 | 27.1 |
| 555 | 11v-04-Icos-1vx—fe2c4—2673           | -3196.060795 | 27.1 |
| 556 | 11v-04-Icos-1vx—fe2c4—1591           | -3196.060607 | 27.2 |
| 557 | 11v-02-TricapCube—fe2c4—300          | -3196.060594 | 27.2 |
| 558 | 11v-03-OhfusettoPentBipyr—fe2c4—1331 | -3196.06056  | 27.2 |

|     |                                      |              |      |
|-----|--------------------------------------|--------------|------|
| 559 | 11v-04-Icos-1vx—fe2c4—1871           | -3196.060551 | 27.2 |
| 560 | 11v-04-Icos-1vx—fe2c4—1966           | -3196.060548 | 27.2 |
| 561 | 11v-01-PentaCapTrPr—fe2c4—189        | -3196.060545 | 27.2 |
| 562 | 11v-04-Icos-1vx—fe2c4—2592           | -3196.060447 | 27.3 |
| 563 | 11v-02-TricapCube—fe2c4—259          | -3196.060417 | 27.3 |
| 564 | 11v-02-TricapCube—fe2c4—286          | -3196.060417 | 27.3 |
| 565 | 11v-02-TricapCube—fe2c4—292          | -3196.060417 | 27.3 |
| 566 | 11v-04-Icos-1vx—fe2c4—2438           | -3196.060346 | 27.4 |
| 567 | 11v-04-Icos-1vx—fe2c4—2540           | -3196.060346 | 27.4 |
| 568 | 11v-04-Icos-1vx—fe2c4—2635           | -3196.060337 | 27.4 |
| 569 | 11v-04-Icos-1vx—fe2c4—2647           | -3196.060326 | 27.4 |
| 570 | 11v-02-TricapCube—fe2c4—321          | -3196.060278 | 27.4 |
| 571 | 11v-04-Icos-1vx—fe2c4—2906           | -3196.06027  | 27.4 |
| 572 | 11v-04-Icos-1vx—fe2c4—3050           | -3196.060254 | 27.4 |
| 573 | 11v-04-Icos-1vx—fe2c4—3036           | -3196.060249 | 27.4 |
| 574 | 11v-01-PentaCapTrPr—fe2c4—90         | -3196.060238 | 27.4 |
| 575 | 11v-04-Icos-1vx—fe2c4—2666           | -3196.060201 | 27.5 |
| 576 | 11v-01-PentaCapTrPr—fe2c4—84         | -3196.060104 | 27.5 |
| 577 | 11v-02-TricapCube—fe2c4—312          | -3196.060029 | 27.6 |
| 578 | 11v-02-TricapCube—fe2c4—239          | -3196.06001  | 27.6 |
| 579 | 11v-02-TricapCube—fe2c4—257          | -3196.06001  | 27.6 |
| 580 | 11v-02-TricapCube—fe2c4—263          | -3196.06001  | 27.6 |
| 581 | 11v-04-Icos-1vx—fe2c4—2423           | -3196.059949 | 27.6 |
| 582 | 11v-01-PentaCapTrPr—fe2c4—93         | -3196.059934 | 27.6 |
| 583 | 11v-04-Icos-1vx—fe2c4—2128           | -3196.059925 | 27.6 |
| 584 | 11v-04-Icos-1vx—fe2c4—2440           | -3196.059885 | 27.6 |
| 585 | 11v-03-OhfusettoPentBipyr—fe2c4—471  | -3196.059692 | 27.8 |
| 586 | 11v-04-Icos-1vx—fe2c4—2147           | -3196.059588 | 27.8 |
| 587 | 11v-04-Icos-1vx—fe2c4—2135           | -3196.059508 | 27.9 |
| 588 | 11v-04-Icos-1vx—fe2c4—2123           | -3196.059491 | 27.9 |
| 589 | 11v-03-OhfusettoPentBipyr—fe2c4—1086 | -3196.059474 | 27.9 |
| 590 | 11v-04-Icos-1vx—fe2c4—2431           | -3196.059441 | 27.9 |
| 591 | 11v-04-Icos-1vx—fe2c4—2254           | -3196.059291 | 28.0 |
| 592 | 11v-04-Icos-1vx—fe2c4—2395           | -3196.059171 | 28.1 |
| 593 | 11v-04-Icos-1vx—fe2c4—1666           | -3196.059145 | 28.1 |
| 594 | 11v-03-OhfusettoPentBipyr—fe2c4—1095 | -3196.059138 | 28.1 |
| 595 | 11v-03-OhfusettoPentBipyr—fe2c4—486  | -3196.058812 | 28.3 |
| 596 | 11v-03-OhfusettoPentBipyr—fe2c4—552  | -3196.058812 | 28.3 |
| 597 | 11v-03-OhfusettoPentBipyr—fe2c4—1166 | -3196.058714 | 28.4 |
| 598 | 11v-03-OhfusettoPentBipyr—fe2c4—1175 | -3196.058714 | 28.4 |
| 599 | 11v-03-OhfusettoPentBipyr—fe2c4—1204 | -3196.058714 | 28.4 |
| 600 | 11v-04-Icos-1vx—fe2c4—1707           | -3196.058672 | 28.4 |
| 601 | 11v-04-Icos-1vx—fe2c4—1718           | -3196.058672 | 28.4 |
| 602 | 11v-04-Icos-1vx—fe2c4—1754           | -3196.058659 | 28.4 |
| 603 | 11v-04-Icos-1vx—fe2c4—1712           | -3196.058511 | 28.5 |
| 604 | 11v-04-Icos-1vx—fe2c4—2885           | -3196.058479 | 28.5 |
| 605 | 11v-04-Icos-1vx—fe2c4—1818           | -3196.058468 | 28.5 |
| 606 | 11v-04-Icos-1vx—fe2c4—1847           | -3196.058468 | 28.5 |
| 607 | 11v-04-Icos-1vx—fe2c4—1865           | -3196.058467 | 28.5 |
| 608 | 11v-04-Icos-1vx—fe2c4—2134           | -3196.058389 | 28.6 |
| 609 | 11v-04-Icos-1vx—fe2c4—2146           | -3196.058373 | 28.6 |



|     |                                        |              |      |
|-----|----------------------------------------|--------------|------|
| 610 | 11v-04-Icos-1vx— fe2c4— 1912           | -3196.058364 | 28.6 |
| 611 | 11v-01-PentaCapTrPr— fe2c4— 151        | -3196.058168 | 28.7 |
| 612 | 11v-01-PentaCapTrPr— fe2c4— 157        | -3196.058155 | 28.7 |
| 613 | 11v-04-Icos-1vx— fe2c4— 1616           | -3196.058134 | 28.7 |
| 614 | 11v-01-PentaCapTrPr— fe2c4— 164        | -3196.058123 | 28.8 |
| 615 | 11v-01-PentaCapTrPr— fe2c4— 145        | -3196.058057 | 28.8 |
| 616 | 11v-04-Icos-1vx— fe2c4— 2590           | -3196.058013 | 28.8 |
| 617 | 11v-04-Icos-1vx— fe2c4— 2578           | -3196.058    | 28.8 |
| 618 | 11v-04-Icos-1vx— fe2c4— 1678           | -3196.057976 | 28.8 |
| 619 | 11v-04-Icos-1vx— fe2c4— 1859           | -3196.057953 | 28.9 |
| 620 | 11v-02-TricapCube— fe2c4— 240          | -3196.05793  | 28.9 |
| 621 | 11v-02-TricapCube— fe2c4— 252          | -3196.05793  | 28.9 |
| 622 | 11v-02-TricapCube— fe2c4— 258          | -3196.05793  | 28.9 |
| 623 | 11v-02-TricapCube— fe2c4— 264          | -3196.05793  | 28.9 |
| 624 | 11v-03-OhfusettoPentBipyr— fe2c4— 1244 | -3196.057918 | 28.9 |
| 625 | 11v-04-Icos-1vx— fe2c4— 1798           | -3196.057865 | 28.9 |
| 626 | 11v-04-Icos-1vx— fe2c4— 1834           | -3196.057865 | 28.9 |
| 627 | 11v-02-TricapCubeA— fe2c4— 221         | -3196.057796 | 29.0 |
| 628 | 11v-01-PentaCapTrPr— fe2c4— 17         | -3196.057666 | 29.0 |
| 629 | 11v-04-Icos-1vx— fe2c4— 1746           | -3196.057624 | 29.1 |
| 630 | 11v-04-Icos-1vx— fe2c4— 1758           | -3196.057624 | 29.1 |
| 631 | 11v-04-Icos-1vx— fe2c4— 1770           | -3196.057624 | 29.1 |
| 632 | 11v-04-Icos-1vx— fe2c4— 1776           | -3196.057624 | 29.1 |
| 633 | 11v-03-OhfusettoPentBipyr— fe2c4— 793  | -3196.057572 | 29.1 |
| 634 | 11v-03-OhfusettoPentBipyr— fe2c4— 841  | -3196.057571 | 29.1 |
| 635 | 11v-03-OhfusettoPentBipyr— fe2c4— 866  | -3196.057571 | 29.1 |
| 636 | 11v-03-OhfusettoPentBipyr— fe2c4— 799  | -3196.057569 | 29.1 |
| 637 | 11v-03-OhfusettoPentBipyr— fe2c4— 854  | -3196.057569 | 29.1 |
| 638 | 11v-03-OhfusettoPentBipyr— fe2c4— 812  | -3196.057546 | 29.1 |
| 639 | 11v-04-Icos-1vx— fe2c4— 1601           | -3196.057541 | 29.1 |
| 640 | 11v-04-Icos-1vx— fe2c4— 1747           | -3196.057538 | 29.1 |
| 641 | 11v-04-Icos-1vx— fe2c4— 1752           | -3196.057538 | 29.1 |
| 642 | 11v-04-Icos-1vx— fe2c4— 1759           | -3196.057538 | 29.1 |
| 643 | 11v-04-Icos-1vx— fe2c4— 1777           | -3196.057538 | 29.1 |
| 644 | 11v-04-Icos-1vx— fe2c4— 1704           | -3196.057526 | 29.1 |
| 645 | 11v-04-Icos-1vx— fe2c4— 1468           | -3196.057516 | 29.1 |
| 646 | 11v-04-Icos-1vx— fe2c4— 1486           | -3196.057516 | 29.1 |
| 647 | 11v-04-Icos-1vx— fe2c4— 1522           | -3196.057516 | 29.1 |
| 648 | 11v-04-Icos-1vx— fe2c4— 1691           | -3196.057435 | 29.2 |
| 649 | 11v-04-Icos-1vx— fe2c4— 2042           | -3196.057399 | 29.2 |
| 650 | 11v-04-Icos-1vx— fe2c4— 1995           | -3196.057397 | 29.2 |
| 651 | 11v-04-Icos-1vx— fe2c4— 2027           | -3196.057382 | 29.2 |
| 652 | 11v-04-Icos-1vx— fe2c4— 3046           | -3196.057357 | 29.2 |
| 653 | 11v-03-OhfusettoPentBipyr— fe2c4— 1030 | -3196.057348 | 29.2 |
| 654 | 11v-04-Icos-1vx— fe2c4— 2893           | -3196.057339 | 29.2 |
| 655 | 11v-03-OhfusettoPentBipyr— fe2c4— 593  | -3196.057328 | 29.3 |
| 656 | 11v-03-OhfusettoPentBipyr— fe2c4— 1218 | -3196.057239 | 29.3 |
| 657 | 11v-02-TricapCube— fe2c4— 260          | -3196.057235 | 29.3 |
| 658 | 11v-04-Icos-1vx— fe2c4— 2641           | -3196.057204 | 29.3 |
| 659 | 11v-03-OhfusettoPentBipyr— fe2c4— 650  | -3196.057199 | 29.3 |
| 660 | 11v-04-Icos-1vx— fe2c4— 2599           | -3196.057193 | 29.3 |

|     |                                        |              |      |
|-----|----------------------------------------|--------------|------|
| 661 | 11v-04-Icos-1vx— fe2c4— 2646           | -3196.057182 | 29.3 |
| 662 | 11v-03-OhfusettoPentBipyr— fe2c4— 1319 | -3196.057168 | 29.4 |
| 663 | 11v-04-Icos-1vx— fe2c4— 2543           | -3196.057112 | 29.4 |
| 664 | 11v-04-Icos-1vx— fe2c4— 2948           | -3196.05711  | 29.4 |
| 665 | 11v-01-PentaCapTrPr— fe2c4— 19         | -3196.057084 | 29.4 |
| 666 | 11v-04-Icos-1vx— fe2c4— 1883           | -3196.057082 | 29.4 |
| 667 | 11v-03-OhfusettoPentBipyr— fe2c4— 1165 | -3196.057081 | 29.4 |
| 668 | 11v-03-OhfusettoPentBipyr— fe2c4— 1174 | -3196.057081 | 29.4 |
| 669 | 11v-03-OhfusettoPentBipyr— fe2c4— 1180 | -3196.057081 | 29.4 |
| 670 | 11v-03-OhfusettoPentBipyr— fe2c4— 540  | -3196.05704  | 29.4 |
| 671 | 11v-03-OhfusettoPentBipyr— fe2c4— 497  | -3196.057038 | 29.4 |
| 672 | 11v-04-Icos-1vx— fe2c4— 2951           | -3196.057021 | 29.4 |
| 673 | 11v-04-Icos-1vx— fe2c4— 2595           | -3196.057016 | 29.4 |
| 674 | 11v-04-Icos-1vx— fe2c4— 1618           | -3196.057006 | 29.5 |
| 675 | 11v-04-Icos-1vx— fe2c4— 1642           | -3196.056989 | 29.5 |
| 676 | 11v-03-OhfusettoPentBipyr— fe2c4— 1156 | -3196.056956 | 29.5 |
| 677 | 11v-03-OhfusettoPentBipyr— fe2c4— 1209 | -3196.056956 | 29.5 |
| 678 | 11v-04-Icos-1vx— fe2c4— 1673           | -3196.056956 | 29.5 |
| 679 | 11v-04-Icos-1vx— fe2c4— 1679           | -3196.056956 | 29.5 |
| 680 | 11v-04-Icos-1vx— fe2c4— 2507           | -3196.056947 | 29.5 |
| 681 | 11v-04-Icos-1vx— fe2c4— 1877           | -3196.056893 | 29.5 |
| 682 | 11v-04-Icos-1vx— fe2c4— 2772           | -3196.056843 | 29.6 |
| 683 | 11v-01-PentaCapTrPr— fe2c4— 176        | -3196.056781 | 29.6 |
| 684 | 11v-04-Icos-1vx— fe2c4— 1880           | -3196.056781 | 29.6 |
| 685 | 11v-01-PentaCapTrPr— fe2c4— 14         | -3196.056753 | 29.6 |
| 686 | 11v-04-Icos-1vx— fe2c4— 2262           | -3196.056701 | 29.6 |
| 687 | 11v-04-Icos-1vx— fe2c4— 2046           | -3196.056682 | 29.7 |
| 688 | 11v-01-PentaCapTrPr— fe2c4— 190        | -3196.05665  | 29.7 |
| 689 | 11v-04-Icos-1vx— fe2c4— 2591           | -3196.05665  | 29.7 |
| 690 | 11v-02-TricapCubeA— fe2c4— 215         | -3196.056595 | 29.7 |
| 691 | 11v-04-Icos-1vx— fe2c4— 2594           | -3196.056563 | 29.7 |
| 692 | 11v-01-PentaCapTrPr— fe2c4— 88         | -3196.056561 | 29.7 |
| 693 | 11v-04-Icos-1vx— fe2c4— 1876           | -3196.056542 | 29.7 |
| 694 | 11v-04-Icos-1vx— fe2c4— 2736           | -3196.056541 | 29.7 |
| 695 | 11v-04-Icos-1vx— fe2c4— 2610           | -3196.05654  | 29.7 |
| 696 | 11v-04-Icos-1vx— fe2c4— 2617           | -3196.05654  | 29.7 |
| 697 | 11v-02-TricapCube— fe2c4— 237          | -3196.056478 | 29.8 |
| 698 | 11v-04-Icos-1vx— fe2c4— 1879           | -3196.056478 | 29.8 |
| 699 | 11v-04-Icos-1vx— fe2c4— 2693           | -3196.056477 | 29.8 |
| 700 | 11v-04-Icos-1vx— fe2c4— 2729           | -3196.056477 | 29.8 |
| 701 | 11v-04-Icos-1vx— fe2c4— 1869           | -3196.056476 | 29.8 |
| 702 | 11v-04-Icos-1vx— fe2c4— 2672           | -3196.056439 | 29.8 |
| 703 | 11v-04-Icos-1vx— fe2c4— 2384           | -3196.056431 | 29.8 |
| 704 | 11v-04-Icos-1vx— fe2c4— 2408           | -3196.056429 | 29.8 |
| 705 | 11v-04-Icos-1vx— fe2c4— 2414           | -3196.056428 | 29.8 |
| 706 | 11v-04-Icos-1vx— fe2c4— 2490           | -3196.056424 | 29.8 |
| 707 | 11v-04-Icos-1vx— fe2c4— 2681           | -3196.056421 | 29.8 |
| 708 | 11v-04-Icos-1vx— fe2c4— 2741           | -3196.056409 | 29.8 |
| 709 | 11v-04-Icos-1vx— fe2c4— 2903           | -3196.056333 | 29.9 |
| 710 | 11v-04-Icos-1vx— fe2c4— 1450           | -3196.056314 | 29.9 |
| 711 | 11v-04-Icos-1vx— fe2c4— 1806           | -3196.056307 | 29.9 |

|     |                                       |              |      |
|-----|---------------------------------------|--------------|------|
| 712 | 11v-04-Icos-1vx— fe2c4—1809           | -3196.056271 | 29.9 |
| 713 | 11v-03-OhfusettoPentBipyr— fe2c4—789  | -3196.056257 | 29.9 |
| 714 | 11v-04-Icos-1vx— fe2c4—1781           | -3196.056134 | 30.0 |
| 715 | 11v-04-Icos-1vx— fe2c4—1614           | -3196.056072 | 30.0 |
| 716 | 11v-04-Icos-1vx— fe2c4—1644           | -3196.056046 | 30.1 |
| 717 | 11v-01-PentaCapTrPr— fe2c4—44         | -3196.056024 | 30.1 |
| 718 | 11v-04-Icos-1vx— fe2c4—1640           | -3196.055979 | 30.1 |
| 719 | 11v-04-Icos-1vx— fe2c4—1856           | -3196.055846 | 30.2 |
| 720 | 11v-04-Icos-1vx— fe2c4—1940           | -3196.055844 | 30.2 |
| 721 | 11v-04-Icos-1vx— fe2c4—1738           | -3196.055749 | 30.2 |
| 722 | 11v-04-Icos-1vx— fe2c4—1826           | -3196.0557   | 30.3 |
| 723 | 11v-04-Icos-1vx— fe2c4—1762           | -3196.055503 | 30.4 |
| 724 | 11v-04-Icos-1vx— fe2c4—2122           | -3196.05525  | 30.6 |
| 725 | 11v-04-Icos-1vx— fe2c4—2950           | -3196.054593 | 31.0 |
| 726 | 11v-03-OhfusettoPentBipyr— fe2c4—687  | -3196.054383 | 31.1 |
| 727 | 11v-03-OhfusettoPentBipyr— fe2c4—727  | -3196.054383 | 31.1 |
| 728 | 11v-03-OhfusettoPentBipyr— fe2c4—747  | -3196.054383 | 31.1 |
| 729 | 11v-03-OhfusettoPentBipyr— fe2c4—753  | -3196.054383 | 31.1 |
| 730 | 11v-03-OhfusettoPentBipyr— fe2c4—775  | -3196.054383 | 31.1 |
| 731 | 11v-04-Icos-1vx— fe2c4—1769           | -3196.054202 | 31.2 |
| 732 | 11v-04-Icos-1vx— fe2c4—3262           | -3196.054196 | 31.2 |
| 733 | 11v-04-Icos-1vx— fe2c4—3268           | -3196.054186 | 31.2 |
| 734 | 11v-04-Icos-1vx— fe2c4—1950           | -3196.054139 | 31.3 |
| 735 | 11v-04-Icos-1vx— fe2c4—1850           | -3196.054137 | 31.3 |
| 736 | 11v-04-Icos-1vx— fe2c4—1934           | -3196.054137 | 31.3 |
| 737 | 11v-04-Icos-1vx— fe2c4—2156           | -3196.054128 | 31.3 |
| 738 | 11v-04-Icos-1vx— fe2c4—2532           | -3196.054126 | 31.3 |
| 739 | 11v-04-Icos-1vx— fe2c4—2119           | -3196.054125 | 31.3 |
| 740 | 11v-04-Icos-1vx— fe2c4—1424           | -3196.054088 | 31.3 |
| 741 | 11v-04-Icos-1vx— fe2c4—1436           | -3196.054088 | 31.3 |
| 742 | 11v-04-Icos-1vx— fe2c4—1536           | -3196.054088 | 31.3 |
| 743 | 11v-04-Icos-1vx— fe2c4—1548           | -3196.054088 | 31.3 |
| 744 | 11v-04-Icos-1vx— fe2c4—1562           | -3196.054088 | 31.3 |
| 745 | 11v-04-Icos-1vx— fe2c4—1882           | -3196.054052 | 31.3 |
| 746 | 11v-01-PentaCapTrPr— fe2c4—134        | -3196.053975 | 31.4 |
| 747 | 11v-01-PentaCapTrPr— fe2c4—140        | -3196.053975 | 31.4 |
| 748 | 11v-04-Icos-1vx— fe2c4—1763           | -3196.053972 | 31.4 |
| 749 | 11v-04-Icos-1vx— fe2c4—1851           | -3196.053958 | 31.4 |
| 750 | 11v-04-Icos-1vx— fe2c4—1935           | -3196.053958 | 31.4 |
| 751 | 11v-01-PentaCapTrPr— fe2c4—163        | -3196.053846 | 31.4 |
| 752 | 11v-01-PentaCapTrPr— fe2c4—161        | -3196.053823 | 31.5 |
| 753 | 11v-03-OhfusettoPentBipyr— fe2c4—760  | -3196.053818 | 31.5 |
| 754 | 11v-01-PentaCapTrPr— fe2c4—152        | -3196.053807 | 31.5 |
| 755 | 11v-04-Icos-1vx— fe2c4—2501           | -3196.053771 | 31.5 |
| 756 | 11v-04-Icos-1vx— fe2c4—3040           | -3196.053768 | 31.5 |
| 757 | 11v-04-Icos-1vx— fe2c4—1960           | -3196.053765 | 31.5 |
| 758 | 11v-01-PentaCapTrPr— fe2c4—46         | -3196.05375  | 31.5 |
| 759 | 11v-03-OhfusettoPentBipyr— fe2c4—1112 | -3196.05374  | 31.5 |
| 760 | 11v-03-OhfusettoPentBipyr— fe2c4—1071 | -3196.053714 | 31.5 |
| 761 | 11v-03-OhfusettoPentBipyr— fe2c4—1120 | -3196.053714 | 31.5 |
| 762 | 11v-04-Icos-1vx— fe2c4—2531           | -3196.053685 | 31.5 |

|     |                                      |              |      |
|-----|--------------------------------------|--------------|------|
| 763 | 11v-01-PentaCapTrPr—fe2c4—146        | -3196.053662 | 31.6 |
| 764 | 11v-04-Icos-1vx—fe2c4—1671           | -3196.053595 | 31.6 |
| 765 | 11v-01-PentaCapTrPr—fe2c4—122        | -3196.053565 | 31.6 |
| 766 | 11v-01-PentaCapTrPr—fe2c4—130        | -3196.053565 | 31.6 |
| 767 | 11v-01-PentaCapTrPr—fe2c4—143        | -3196.053565 | 31.6 |
| 768 | 11v-04-Icos-1vx—fe2c4—1745           | -3196.053565 | 31.6 |
| 769 | 11v-01-PentaCapTrPr—fe2c4—148        | -3196.053536 | 31.6 |
| 770 | 11v-04-Icos-1vx—fe2c4—2537           | -3196.053354 | 31.7 |
| 771 | 11v-03-OhfusettoPentBipyr—fe2c4—1052 | -3196.053261 | 31.8 |
| 772 | 11v-04-Icos-1vx—fe2c4—1852           | -3196.05302  | 32.0 |
| 773 | 11v-04-Icos-1vx—fe2c4—1813           | -3196.052941 | 32.0 |
| 774 | 11v-04-Icos-1vx—fe2c4—1819           | -3196.052941 | 32.0 |
| 775 | 11v-04-Icos-1vx—fe2c4—1881           | -3196.052915 | 32.0 |
| 776 | 11v-04-Icos-1vx—fe2c4—1757           | -3196.052885 | 32.0 |
| 777 | 11v-04-Icos-1vx—fe2c4—1784           | -3196.052885 | 32.0 |
| 778 | 11v-04-Icos-1vx—fe2c4—1802           | -3196.052885 | 32.0 |
| 779 | 11v-04-Icos-1vx—fe2c4—1858           | -3196.052871 | 32.1 |
| 780 | 11v-03-OhfusettoPentBipyr—fe2c4—473  | -3196.052814 | 32.1 |
| 781 | 11v-03-OhfusettoPentBipyr—fe2c4—515  | -3196.052814 | 32.1 |
| 782 | 11v-03-OhfusettoPentBipyr—fe2c4—1182 | -3196.052705 | 32.2 |
| 783 | 11v-04-Icos-1vx—fe2c4—1954           | -3196.052692 | 32.2 |
| 784 | 11v-03-OhfusettoPentBipyr—fe2c4—1259 | -3196.052476 | 32.3 |
| 785 | 11v-03-OhfusettoPentBipyr—fe2c4—1247 | -3196.052474 | 32.3 |
| 786 | 11v-04-Icos-1vx—fe2c4—1766           | -3196.052471 | 32.3 |
| 787 | 11v-03-OhfusettoPentBipyr—fe2c4—1176 | -3196.05244  | 32.3 |
| 788 | 11v-01-PentaCapTrPr—fe2c4—3          | -3196.052439 | 32.3 |
| 789 | 11v-01-PentaCapTrPr—fe2c4—72         | -3196.052439 | 32.3 |
| 790 | 11v-03-OhfusettoPentBipyr—fe2c4—1164 | -3196.052301 | 32.4 |
| 791 | 11v-04-Icos-1vx—fe2c4—1465           | -3196.05229  | 32.4 |
| 792 | 11v-04-Icos-1vx—fe2c4—1557           | -3196.05229  | 32.4 |
| 793 | 11v-04-Icos-1vx—fe2c4—1564           | -3196.05229  | 32.4 |
| 794 | 11v-03-OhfusettoPentBipyr—fe2c4—905  | -3196.052277 | 32.4 |
| 795 | 11v-04-Icos-1vx—fe2c4—2611           | -3196.052171 | 32.5 |
| 796 | 11v-03-OhfusettoPentBipyr—fe2c4—507  | -3196.052167 | 32.5 |
| 797 | 11v-03-OhfusettoPentBipyr—fe2c4—1155 | -3196.052062 | 32.6 |
| 798 | 11v-03-OhfusettoPentBipyr—fe2c4—1167 | -3196.052062 | 32.6 |
| 799 | 11v-04-Icos-1vx—fe2c4—2377           | -3196.051993 | 32.6 |
| 800 | 11v-04-Icos-1vx—fe2c4—2443           | -3196.051993 | 32.6 |
| 801 | 11v-04-Icos-1vx—fe2c4—2449           | -3196.051993 | 32.6 |
| 802 | 11v-04-Icos-1vx—fe2c4—2454           | -3196.051993 | 32.6 |
| 803 | 11v-02-TricapCube—fe2c4—301          | -3196.05191  | 32.7 |
| 804 | 11v-02-TricapCube—fe2c4—315          | -3196.05191  | 32.7 |
| 805 | 11v-03-OhfusettoPentBipyr—fe2c4—1242 | -3196.051655 | 32.8 |
| 806 | 11v-01-PentaCapTrPr—fe2c4—47         | -3196.05158  | 32.9 |
| 807 | 11v-04-Icos-1vx—fe2c4—1792           | -3196.051576 | 32.9 |
| 808 | 11v-04-Icos-1vx—fe2c4—1804           | -3196.05156  | 32.9 |
| 809 | 11v-01-PentaCapTrPr—fe2c4—8          | -3196.051479 | 32.9 |
| 810 | 11v-04-Icos-1vx—fe2c4—3141           | -3196.051466 | 32.9 |
| 811 | 11v-04-Icos-1vx—fe2c4—3099           | -3196.051464 | 32.9 |
| 812 | 11v-01-PentaCapTrPr—fe2c4—83         | -3196.051448 | 32.9 |
| 813 | 11v-04-Icos-1vx—fe2c4—3251           | -3196.051428 | 33.0 |

|     |                                      |              |      |
|-----|--------------------------------------|--------------|------|
| 814 | 11v-01-PentaCapTrPr—fe2c4—86         | -3196.0514   | 33.0 |
| 815 | 11v-04-Icos-1vx—fe2c4—2177           | -3196.051321 | 33.0 |
| 816 | 11v-01-PentaCapTrPr—fe2c4—94         | -3196.05131  | 33.0 |
| 817 | 11v-04-Icos-1vx—fe2c4—2183           | -3196.051303 | 33.0 |
| 818 | 11v-04-Icos-1vx—fe2c4—2400           | -3196.051287 | 33.0 |
| 819 | 11v-04-Icos-1vx—fe2c4—2388           | -3196.051285 | 33.0 |
| 820 | 11v-01-PentaCapTrPr—fe2c4—25         | -3196.051105 | 33.2 |
| 821 | 11v-03-OhfusettoPentBipyr—fe2c4—783  | -3196.050887 | 33.3 |
| 822 | 11v-02-TricapCubeA—fe2c4—204         | -3196.050827 | 33.3 |
| 823 | 11v-02-TricapCubeA—fe2c4—210         | -3196.050827 | 33.3 |
| 824 | 11v-03-OhfusettoPentBipyr—fe2c4—743  | -3196.050745 | 33.4 |
| 825 | 11v-04-Icos-1vx—fe2c4—1815           | -3196.050673 | 33.4 |
| 826 | 11v-04-Icos-1vx—fe2c4—1827           | -3196.050673 | 33.4 |
| 827 | 11v-04-Icos-1vx—fe2c4—1783           | -3196.05065  | 33.4 |
| 828 | 11v-04-Icos-1vx—fe2c4—1796           | -3196.05065  | 33.4 |
| 829 | 11v-04-Icos-1vx—fe2c4—2576           | -3196.050509 | 33.5 |
| 830 | 11v-04-Icos-1vx—fe2c4—1443           | -3196.050294 | 33.7 |
| 831 | 11v-04-Icos-1vx—fe2c4—1479           | -3196.050294 | 33.7 |
| 832 | 11v-04-Icos-1vx—fe2c4—1452           | -3196.050293 | 33.7 |
| 833 | 11v-04-Icos-1vx—fe2c4—1533           | -3196.050292 | 33.7 |
| 834 | 11v-04-Icos-1vx—fe2c4—2211           | -3196.05028  | 33.7 |
| 835 | 11v-03-OhfusettoPentBipyr—fe2c4—558  | -3196.049677 | 34.1 |
| 836 | 11v-03-OhfusettoPentBipyr—fe2c4—774  | -3196.049374 | 34.2 |
| 837 | 11v-04-Icos-1vx—fe2c4—1846           | -3196.049355 | 34.3 |
| 838 | 11v-04-Icos-1vx—fe2c4—1864           | -3196.049355 | 34.3 |
| 839 | 11v-04-Icos-1vx—fe2c4—1744           | -3196.048996 | 34.5 |
| 840 | 11v-03-OhfusettoPentBipyr—fe2c4—804  | -3196.048926 | 34.5 |
| 841 | 11v-03-OhfusettoPentBipyr—fe2c4—807  | -3196.048911 | 34.5 |
| 842 | 11v-03-OhfusettoPentBipyr—fe2c4—828  | -3196.048911 | 34.5 |
| 843 | 11v-03-OhfusettoPentBipyr—fe2c4—879  | -3196.048893 | 34.5 |
| 844 | 11v-04-Icos-1vx—fe2c4—1853           | -3196.048854 | 34.6 |
| 845 | 11v-03-OhfusettoPentBipyr—fe2c4—849  | -3196.048806 | 34.6 |
| 846 | 11v-04-Icos-1vx—fe2c4—2947           | -3196.048752 | 34.6 |
| 847 | 11v-01-PentaCapTrPr—fe2c4—31         | -3196.048711 | 34.7 |
| 848 | 11v-03-OhfusettoPentBipyr—fe2c4—1029 | -3196.048574 | 34.7 |
| 849 | 11v-04-Icos-1vx—fe2c4—2930           | -3196.048069 | 35.1 |
| 850 | 11v-03-OhfusettoPentBipyr—fe2c4—738  | -3196.048048 | 35.1 |
| 851 | 11v-03-OhfusettoPentBipyr—fe2c4—768  | -3196.048048 | 35.1 |
| 852 | 11v-02-TricapCube—fe2c4—245          | -3196.048022 | 35.1 |
| 853 | 11v-04-Icos-1vx—fe2c4—2476           | -3196.047903 | 35.2 |
| 854 | 11v-04-Icos-1vx—fe2c4—2482           | -3196.047903 | 35.2 |
| 855 | 11v-04-Icos-1vx—fe2c4—2045           | -3196.047729 | 35.3 |
| 856 | 11v-04-Icos-1vx—fe2c4—1597           | -3196.047461 | 35.4 |
| 857 | 11v-04-Icos-1vx—fe2c4—2069           | -3196.047407 | 35.5 |
| 858 | 11v-04-Icos-1vx—fe2c4—1997           | -3196.047405 | 35.5 |
| 859 | 11v-04-Icos-1vx—fe2c4—2009           | -3196.047405 | 35.5 |
| 860 | 11v-04-Icos-1vx—fe2c4—2033           | -3196.047397 | 35.5 |
| 861 | 11v-03-OhfusettoPentBipyr—fe2c4—1223 | -3196.047343 | 35.5 |
| 862 | 11v-03-OhfusettoPentBipyr—fe2c4—1251 | -3196.047265 | 35.6 |
| 863 | 11v-04-Icos-1vx—fe2c4—1576           | -3196.047258 | 35.6 |
| 864 | 11v-04-Icos-1vx—fe2c4—2579           | -3196.047257 | 35.6 |

|     |                                      |              |      |
|-----|--------------------------------------|--------------|------|
| 865 | 11v-01-PentaCapTrPr—fe2c4—106        | -3196.047235 | 35.6 |
| 866 | 11v-04-Icos-1vx—fe2c4—1393           | -3196.047161 | 35.6 |
| 867 | 11v-03-OhfusettoPentBipyr—fe2c4—1243 | -3196.047148 | 35.6 |
| 868 | 11v-03-OhfusettoPentBipyr—fe2c4—1252 | -3196.047148 | 35.6 |
| 869 | 11v-04-Icos-1vx—fe2c4—1811           | -3196.04709  | 35.7 |
| 870 | 11v-04-Icos-1vx—fe2c4—1734           | -3196.047073 | 35.7 |
| 871 | 11v-04-Icos-1vx—fe2c4—1419           | -3196.047041 | 35.7 |
| 872 | 11v-04-Icos-1vx—fe2c4—1730           | -3196.047015 | 35.7 |
| 873 | 11v-04-Icos-1vx—fe2c4—1731           | -3196.046947 | 35.8 |
| 874 | 11v-04-Icos-1vx—fe2c4—1507           | -3196.04693  | 35.8 |
| 875 | 11v-04-Icos-1vx—fe2c4—1482           | -3196.046929 | 35.8 |
| 876 | 11v-02-TricapCube—fe2c4—241          | -3196.046716 | 35.9 |
| 877 | 11v-03-OhfusettoPentBipyr—fe2c4—1347 | -3196.046327 | 36.2 |
| 878 | 11v-03-OhfusettoPentBipyr—fe2c4—1031 | -3196.046222 | 36.2 |
| 879 | 11v-03-OhfusettoPentBipyr—fe2c4—1025 | -3196.046214 | 36.2 |
| 880 | 11v-01-PentaCapTrPr—fe2c4—174        | -3196.046191 | 36.2 |
| 881 | 11v-03-OhfusettoPentBipyr—fe2c4—1129 | -3196.046176 | 36.3 |
| 882 | 11v-04-Icos-1vx—fe2c4—3138           | -3196.046172 | 36.3 |
| 883 | 11v-04-Icos-1vx—fe2c4—3103           | -3196.046164 | 36.3 |
| 884 | 11v-04-Icos-1vx—fe2c4—2688           | -3196.046121 | 36.3 |
| 885 | 11v-04-Icos-1vx—fe2c4—2733           | -3196.046118 | 36.3 |
| 886 | 11v-04-Icos-1vx—fe2c4—2655           | -3196.04611  | 36.3 |
| 887 | 11v-04-Icos-1vx—fe2c4—3237           | -3196.046105 | 36.3 |
| 888 | 11v-04-Icos-1vx—fe2c4—3258           | -3196.046088 | 36.3 |
| 889 | 11v-04-Icos-1vx—fe2c4—2552           | -3196.046087 | 36.3 |
| 890 | 11v-04-Icos-1vx—fe2c4—3231           | -3196.046074 | 36.3 |
| 891 | 11v-04-Icos-1vx—fe2c4—2546           | -3196.046062 | 36.3 |
| 892 | 11v-04-Icos-1vx—fe2c4—2700           | -3196.046043 | 36.3 |
| 893 | 11v-04-Icos-1vx—fe2c4—2172           | -3196.046038 | 36.3 |
| 894 | 11v-04-Icos-1vx—fe2c4—2619           | -3196.046038 | 36.3 |
| 895 | 11v-04-Icos-1vx—fe2c4—2391           | -3196.046036 | 36.3 |
| 896 | 11v-04-Icos-1vx—fe2c4—2604           | -3196.046036 | 36.3 |
| 897 | 11v-04-Icos-1vx—fe2c4—2628           | -3196.046033 | 36.3 |
| 898 | 11v-04-Icos-1vx—fe2c4—2601           | -3196.046027 | 36.3 |
| 899 | 11v-04-Icos-1vx—fe2c4—2185           | -3196.046019 | 36.4 |
| 900 | 11v-04-Icos-1vx—fe2c4—2166           | -3196.046011 | 36.4 |
| 901 | 11v-04-Icos-1vx—fe2c4—2558           | -3196.04601  | 36.4 |
| 902 | 11v-04-Icos-1vx—fe2c4—2407           | -3196.046009 | 36.4 |
| 903 | 11v-04-Icos-1vx—fe2c4—2643           | -3196.045989 | 36.4 |
| 904 | 11v-04-Icos-1vx—fe2c4—2208           | -3196.045987 | 36.4 |
| 905 | 11v-04-Icos-1vx—fe2c4—2549           | -3196.045968 | 36.4 |
| 906 | 11v-04-Icos-1vx—fe2c4—2403           | -3196.045964 | 36.4 |
| 907 | 11v-03-OhfusettoPentBipyr—fe2c4—1087 | -3196.045837 | 36.5 |
| 908 | 11v-03-OhfusettoPentBipyr—fe2c4—1135 | -3196.045837 | 36.5 |
| 909 | 11v-03-OhfusettoPentBipyr—fe2c4—1147 | -3196.045837 | 36.5 |
| 910 | 11v-04-Icos-1vx—fe2c4—3123           | -3196.045818 | 36.5 |
| 911 | 11v-04-Icos-1vx—fe2c4—3210           | -3196.045805 | 36.5 |
| 912 | 11v-01-PentaCapTrPr—fe2c4—138        | -3196.045804 | 36.5 |
| 913 | 11v-04-Icos-1vx—fe2c4—2034           | -3196.045722 | 36.5 |
| 914 | 11v-01-PentaCapTrPr—fe2c4—150        | -3196.045718 | 36.5 |
| 915 | 11v-04-Icos-1vx—fe2c4—2022           | -3196.045717 | 36.5 |

|     |                                      |              |      |
|-----|--------------------------------------|--------------|------|
| 916 | 11v-01-PentaCapTrPr—fe2c4—110        | -3196.045661 | 36.6 |
| 917 | 11v-01-PentaCapTrPr—fe2c4—129        | -3196.045666 | 36.6 |
| 918 | 11v-04-Icos-1vx—fe2c4—2168           | -3196.045635 | 36.6 |
| 919 | 11v-01-PentaCapTrPr—fe2c4—109        | -3196.045541 | 36.7 |
| 920 | 11v-01-PentaCapTrPr—fe2c4—135        | -3196.045541 | 36.7 |
| 921 | 11v-01-PentaCapTrPr—fe2c4—141        | -3196.045541 | 36.7 |
| 922 | 11v-01-PentaCapTrPr—fe2c4—132        | -3196.045524 | 36.7 |
| 923 | 11v-04-Icos-1vx—fe2c4—3172           | -3196.045503 | 36.7 |
| 924 | 11v-04-Icos-1vx—fe2c4—2899           | -3196.045486 | 36.7 |
| 925 | 11v-04-Icos-1vx—fe2c4—3024           | -3196.045474 | 36.7 |
| 926 | 11v-04-Icos-1vx—fe2c4—3214           | -3196.045469 | 36.7 |
| 927 | 11v-04-Icos-1vx—fe2c4—2965           | -3196.045467 | 36.7 |
| 928 | 11v-04-Icos-1vx—fe2c4—3184           | -3196.045461 | 36.7 |
| 929 | 11v-04-Icos-1vx—fe2c4—2206           | -3196.045457 | 36.7 |
| 930 | 11v-04-Icos-1vx—fe2c4—2940           | -3196.045457 | 36.7 |
| 931 | 11v-04-Icos-1vx—fe2c4—3145           | -3196.045438 | 36.7 |
| 932 | 11v-04-Icos-1vx—fe2c4—2907           | -3196.045436 | 36.7 |
| 933 | 11v-04-Icos-1vx—fe2c4—3165           | -3196.04543  | 36.7 |
| 934 | 11v-04-Icos-1vx—fe2c4—3106           | -3196.045429 | 36.7 |
| 935 | 11v-04-Icos-1vx—fe2c4—3000           | -3196.045341 | 36.8 |
| 936 | 11v-04-Icos-1vx—fe2c4—3051           | -3196.045331 | 36.8 |
| 937 | 11v-04-Icos-1vx—fe2c4—2911           | -3196.045297 | 36.8 |
| 938 | 11v-04-Icos-1vx—fe2c4—2181           | -3196.045285 | 36.8 |
| 939 | 11v-04-Icos-1vx—fe2c4—2163           | -3196.045283 | 36.8 |
| 940 | 11v-04-Icos-1vx—fe2c4—2174           | -3196.045283 | 36.8 |
| 941 | 11v-04-Icos-1vx—fe2c4—2220           | -3196.045275 | 36.8 |
| 942 | 11v-04-Icos-1vx—fe2c4—2769           | -3196.045266 | 36.8 |
| 943 | 11v-04-Icos-1vx—fe2c4—2781           | -3196.045259 | 36.8 |
| 944 | 11v-04-Icos-1vx—fe2c4—3150           | -3196.045231 | 36.8 |
| 945 | 11v-04-Icos-1vx—fe2c4—3109           | -3196.045229 | 36.8 |
| 946 | 11v-04-Icos-1vx—fe2c4—2224           | -3196.045157 | 36.9 |
| 947 | 11v-03-OhfusettoPentBipyr—fe2c4—1148 | -3196.045115 | 36.9 |
| 948 | 11v-04-Icos-1vx—fe2c4—2571           | -3196.045078 | 36.9 |
| 949 | 11v-04-Icos-1vx—fe2c4—1387           | -3196.045077 | 36.9 |
| 950 | 11v-01-PentaCapTrPr—fe2c4—107        | -3196.045057 | 37.0 |
| 951 | 11v-04-Icos-1vx—fe2c4—3152           | -3196.045048 | 37.0 |
| 952 | 11v-03-OhfusettoPentBipyr—fe2c4—1220 | -3196.044999 | 37.0 |
| 953 | 11v-04-Icos-1vx—fe2c4—1740           | -3196.044989 | 37.0 |
| 954 | 11v-03-OhfusettoPentBipyr—fe2c4—1184 | -3196.044974 | 37.0 |
| 955 | 11v-03-OhfusettoPentBipyr—fe2c4—1226 | -3196.044968 | 37.0 |
| 956 | 11v-03-OhfusettoPentBipyr—fe2c4—1171 | -3196.044967 | 37.0 |
| 957 | 11v-04-Icos-1vx—fe2c4—1370           | -3196.044938 | 37.0 |
| 958 | 11v-04-Icos-1vx—fe2c4—1375           | -3196.044938 | 37.0 |
| 959 | 11v-04-Icos-1vx—fe2c4—1382           | -3196.044938 | 37.0 |
| 960 | 11v-04-Icos-1vx—fe2c4—1395           | -3196.044938 | 37.0 |
| 961 | 11v-04-Icos-1vx—fe2c4—1728           | -3196.044927 | 37.0 |
| 962 | 11v-04-Icos-1vx—fe2c4—1729           | -3196.044739 | 37.2 |
| 963 | 11v-04-Icos-1vx—fe2c4—1390           | -3196.04473  | 37.2 |
| 964 | 11v-04-Icos-1vx—fe2c4—3133           | -3196.044723 | 37.2 |
| 965 | 11v-04-Icos-1vx—fe2c4—3216           | -3196.044722 | 37.2 |
| 966 | 11v-04-Icos-1vx—fe2c4—1627           | -3196.044707 | 37.2 |

|      |                                      |              |      |
|------|--------------------------------------|--------------|------|
| 967  | 11v-04-Icos-1vx—fe2c4—1632           | -3196.044707 | 37.2 |
| 968  | 11v-04-Icos-1vx—fe2c4—1884           | -3196.044707 | 37.2 |
| 969  | 11v-04-Icos-1vx—fe2c4—1863           | -3196.044695 | 37.2 |
| 970  | 11v-04-Icos-1vx—fe2c4—1929           | -3196.044695 | 37.2 |
| 971  | 11v-04-Icos-1vx—fe2c4—1845           | -3196.044693 | 37.2 |
| 972  | 11v-04-Icos-1vx—fe2c4—1893           | -3196.044693 | 37.2 |
| 973  | 11v-04-Icos-1vx—fe2c4—1394           | -3196.044582 | 37.3 |
| 974  | 11v-04-Icos-1vx—fe2c4—1816           | -3196.044558 | 37.3 |
| 975  | 11v-04-Icos-1vx—fe2c4—1828           | -3196.044558 | 37.3 |
| 976  | 11v-04-Icos-1vx—fe2c4—2191           | -3196.044547 | 37.3 |
| 977  | 11v-04-Icos-1vx—fe2c4—1590           | -3196.0444   | 37.4 |
| 978  | 11v-04-Icos-1vx—fe2c4—2425           | -3196.04422  | 37.5 |
| 979  | 11v-04-Icos-1vx—fe2c4—2401           | -3196.044217 | 37.5 |
| 980  | 11v-04-Icos-1vx—fe2c4—2389           | -3196.044212 | 37.5 |
| 981  | 11v-04-Icos-1vx—fe2c4—2514           | -3196.044202 | 37.5 |
| 982  | 11v-04-Icos-1vx—fe2c4—1999           | -3196.044106 | 37.6 |
| 983  | 11v-01-PentaCapTrPr—fe2c4—61         | -3196.044084 | 37.6 |
| 984  | 11v-01-PentaCapTrPr—fe2c4—70         | -3196.044072 | 37.6 |
| 985  | 11v-02-TricapCubeA—fe2c4—227         | -3196.044023 | 37.6 |
| 986  | 11v-04-Icos-1vx—fe2c4—2037           | -3196.043709 | 37.8 |
| 987  | 11v-04-Icos-1vx—fe2c4—1656           | -3196.043683 | 37.8 |
| 988  | 11v-04-Icos-1vx—fe2c4—2974           | -3196.043638 | 37.8 |
| 989  | 11v-04-Icos-1vx—fe2c4—3091           | -3196.043522 | 37.9 |
| 990  | 11v-01-PentaCapTrPr—fe2c4—22         | -3196.043519 | 37.9 |
| 991  | 11v-04-Icos-1vx—fe2c4—2086           | -3196.043423 | 38.0 |
| 992  | 11v-03-OhfusettoPentBipyr—fe2c4—771  | -3196.043312 | 38.0 |
| 993  | 11v-01-PentaCapTrPr—fe2c4—71         | -3196.042882 | 38.3 |
| 994  | 11v-01-PentaCapTrPr—fe2c4—52         | -3196.04288  | 38.3 |
| 995  | 11v-01-PentaCapTrPr—fe2c4—62         | -3196.04288  | 38.3 |
| 996  | 11v-02-TricapCube—fe2c4—267          | -3196.04255  | 38.5 |
| 997  | 11v-04-Icos-1vx—fe2c4—3080           | -3196.042549 | 38.5 |
| 998  | 11v-04-Icos-1vx—fe2c4—2989           | -3196.04253  | 38.5 |
| 999  | 11v-04-Icos-1vx—fe2c4—2977           | -3196.042512 | 38.6 |
| 1000 | 11v-04-Icos-1vx—fe2c4—1444           | -3196.042501 | 38.6 |
| 1001 | 11v-01-PentaCapTrPr—fe2c4—58         | -3196.042398 | 38.6 |
| 1002 | 11v-04-Icos-1vx—fe2c4—2386           | -3196.042398 | 38.6 |
| 1003 | 11v-01-PentaCapTrPr—fe2c4—64         | -3196.042387 | 38.6 |
| 1004 | 11v-03-OhfusettoPentBipyr—fe2c4—1263 | -3196.042283 | 38.7 |
| 1005 | 11v-03-OhfusettoPentBipyr—fe2c4—1253 | -3196.042281 | 38.7 |
| 1006 | 11v-04-Icos-1vx—fe2c4—3033           | -3196.042218 | 38.7 |
| 1007 | 11v-02-TricapCube—fe2c4—281          | -3196.042207 | 38.7 |
| 1008 | 11v-02-TricapCube—fe2c4—323          | -3196.042207 | 38.7 |
| 1009 | 11v-04-Icos-1vx—fe2c4—2929           | -3196.04211  | 38.8 |
| 1010 | 11v-04-Icos-1vx—fe2c4—1447           | -3196.042102 | 38.8 |
| 1011 | 11v-04-Icos-1vx—fe2c4—1602           | -3196.042102 | 38.8 |
| 1012 | 11v-04-Icos-1vx—fe2c4—1609           | -3196.042102 | 38.8 |
| 1013 | 11v-04-Icos-1vx—fe2c4—2832           | -3196.042035 | 38.9 |
| 1014 | 11v-04-Icos-1vx—fe2c4—1775           | -3196.041964 | 38.9 |
| 1015 | 11v-04-Icos-1vx—fe2c4—3164           | -3196.041947 | 38.9 |
| 1016 | 11v-04-Icos-1vx—fe2c4—1413           | -3196.041809 | 39.0 |
| 1017 | 11v-04-Icos-1vx—fe2c4—1434           | -3196.041719 | 39.0 |



|      |                                        |              |      |
|------|----------------------------------------|--------------|------|
| 1018 | 11v-04-Icos-1vx— fe2c4— 1494           | -3196.041719 | 39.0 |
| 1019 | 11v-04-Icos-1vx— fe2c4— 1506           | -3196.041719 | 39.0 |
| 1020 | 11v-04-Icos-1vx— fe2c4— 1560           | -3196.041719 | 39.0 |
| 1021 | 11v-04-Icos-1vx— fe2c4— 3276           | -3196.041719 | 39.0 |
| 1022 | 11v-03-OhfusettoPentBipyr— fe2c4— 1111 | -3196.041544 | 39.2 |
| 1023 | 11v-01-PentaCapTrPr— fe2c4— 172        | -3196.041486 | 39.2 |
| 1024 | 11v-01-PentaCapTrPr— fe2c4— 137        | -3196.041482 | 39.2 |
| 1025 | 11v-03-OhfusettoPentBipyr— fe2c4— 1139 | -3196.041446 | 39.2 |
| 1026 | 11v-03-OhfusettoPentBipyr— fe2c4— 1075 | -3196.041365 | 39.3 |
| 1027 | 11v-03-OhfusettoPentBipyr— fe2c4— 1081 | -3196.041354 | 39.3 |
| 1028 | 11v-03-OhfusettoPentBipyr— fe2c4— 827  | -3196.040846 | 39.6 |
| 1029 | 11v-04-Icos-1vx— fe2c4— 2972           | -3196.040838 | 39.6 |
| 1030 | 11v-03-OhfusettoPentBipyr— fe2c4— 803  | -3196.040829 | 39.6 |
| 1031 | 11v-03-OhfusettoPentBipyr— fe2c4— 838  | -3196.040797 | 39.6 |
| 1032 | 11v-03-OhfusettoPentBipyr— fe2c4— 806  | -3196.040786 | 39.6 |
| 1033 | 11v-04-Icos-1vx— fe2c4— 1736           | -3196.040657 | 39.7 |
| 1034 | 11v-01-PentaCapTrPr— fe2c4— 87         | -3196.040619 | 39.7 |
| 1035 | 11v-01-PentaCapTrPr— fe2c4— 105        | -3196.040562 | 39.8 |
| 1036 | 11v-03-OhfusettoPentBipyr— fe2c4— 861  | -3196.040556 | 39.8 |
| 1037 | 11v-03-OhfusettoPentBipyr— fe2c4— 877  | -3196.040556 | 39.8 |
| 1038 | 11v-04-Icos-1vx— fe2c4— 1700           | -3196.040533 | 39.8 |
| 1039 | 11v-04-Icos-1vx— fe2c4— 1705           | -3196.040533 | 39.8 |
| 1040 | 11v-04-Icos-1vx— fe2c4— 1732           | -3196.040523 | 39.8 |
| 1041 | 11v-01-PentaCapTrPr— fe2c4— 85         | -3196.040466 | 39.8 |
| 1042 | 11v-04-Icos-1vx— fe2c4— 2572           | -3196.040395 | 39.9 |
| 1043 | 11v-01-PentaCapTrPr— fe2c4— 103        | -3196.040368 | 39.9 |
| 1044 | 11v-03-OhfusettoPentBipyr— fe2c4— 816  | -3196.040367 | 39.9 |
| 1045 | 11v-03-OhfusettoPentBipyr— fe2c4— 819  | -3196.040367 | 39.9 |
| 1046 | 11v-03-OhfusettoPentBipyr— fe2c4— 825  | -3196.040367 | 39.9 |
| 1047 | 11v-03-OhfusettoPentBipyr— fe2c4— 873  | -3196.040367 | 39.9 |
| 1048 | 11v-04-Icos-1vx— fe2c4— 1706           | -3196.040356 | 39.9 |
| 1049 | 11v-04-Icos-1vx— fe2c4— 2959           | -3196.040326 | 39.9 |
| 1050 | 11v-04-Icos-1vx— fe2c4— 2941           | -3196.040321 | 39.9 |
| 1051 | 11v-01-PentaCapTrPr— fe2c4— 114        | -3196.040319 | 39.9 |
| 1052 | 11v-01-PentaCapTrPr— fe2c4— 126        | -3196.040319 | 39.9 |
| 1053 | 11v-01-PentaCapTrPr— fe2c4— 79         | -3196.04027  | 40.0 |
| 1054 | 11v-04-Icos-1vx— fe2c4— 1861           | -3196.040259 | 40.0 |
| 1055 | 11v-04-Icos-1vx— fe2c4— 3167           | -3196.04023  | 40.0 |
| 1056 | 11v-04-Icos-1vx— fe2c4— 1891           | -3196.040199 | 40.0 |
| 1057 | 11v-04-Icos-1vx— fe2c4— 3196           | -3196.040199 | 40.0 |
| 1058 | 11v-04-Icos-1vx— fe2c4— 3034           | -3196.040194 | 40.0 |
| 1059 | 11v-04-Icos-1vx— fe2c4— 1897           | -3196.040192 | 40.0 |
| 1060 | 11v-04-Icos-1vx— fe2c4— 2089           | -3196.040056 | 40.1 |
| 1061 | 11v-04-Icos-1vx— fe2c4— 3246           | -3196.04004  | 40.1 |
| 1062 | 11v-04-Icos-1vx— fe2c4— 3230           | -3196.040038 | 40.1 |
| 1063 | 11v-04-Icos-1vx— fe2c4— 2028           | -3196.040033 | 40.1 |
| 1064 | 11v-04-Icos-1vx— fe2c4— 3236           | -3196.04003  | 40.1 |
| 1065 | 11v-04-Icos-1vx— fe2c4— 1446           | -3196.039997 | 40.1 |
| 1066 | 11v-04-Icos-1vx— fe2c4— 1596           | -3196.039997 | 40.1 |
| 1067 | 11v-04-Icos-1vx— fe2c4— 1608           | -3196.039997 | 40.1 |
| 1068 | 11v-04-Icos-1vx— fe2c4— 2602           | -3196.039956 | 40.2 |

|      |                                        |              |      |
|------|----------------------------------------|--------------|------|
| 1069 | 11v-04-Icos-1vx— fe2c4— 2023           | -3196.039953 | 40.2 |
| 1070 | 11v-01-PentaCapTrPr— fe2c4— 63         | -3196.03993  | 40.2 |
| 1071 | 11v-04-Icos-1vx— fe2c4— 1699           | -3196.039888 | 40.2 |
| 1072 | 11v-04-Icos-1vx— fe2c4— 1717           | -3196.039888 | 40.2 |
| 1073 | 11v-04-Icos-1vx— fe2c4— 2855           | -3196.03973  | 40.3 |
| 1074 | 11v-04-Icos-1vx— fe2c4— 2849           | -3196.039721 | 40.3 |
| 1075 | 11v-04-Icos-1vx— fe2c4— 2573           | -3196.03969  | 40.3 |
| 1076 | 11v-03-OhfusettoPentBipyr— fe2c4— 794  | -3196.039583 | 40.4 |
| 1077 | 11v-04-Icos-1vx— fe2c4— 1936           | -3196.039497 | 40.4 |
| 1078 | 11v-04-Icos-1vx— fe2c4— 1885           | -3196.039437 | 40.5 |
| 1079 | 11v-04-Icos-1vx— fe2c4— 1959           | -3196.039437 | 40.5 |
| 1080 | 11v-04-Icos-1vx— fe2c4— 1930           | -3196.039435 | 40.5 |
| 1081 | 11v-01-PentaCapTrPr— fe2c4— 40         | -3196.039394 | 40.5 |
| 1082 | 11v-04-Icos-1vx— fe2c4— 1748           | -3196.039366 | 40.5 |
| 1083 | 11v-04-Icos-1vx— fe2c4— 1760           | -3196.039366 | 40.5 |
| 1084 | 11v-04-Icos-1vx— fe2c4— 1778           | -3196.039366 | 40.5 |
| 1085 | 11v-04-Icos-1vx— fe2c4— 1528           | -3196.039313 | 40.6 |
| 1086 | 11v-04-Icos-1vx— fe2c4— 1456           | -3196.039311 | 40.6 |
| 1087 | 11v-04-Icos-1vx— fe2c4— 1474           | -3196.039311 | 40.6 |
| 1088 | 11v-04-Icos-1vx— fe2c4— 1451           | -3196.039303 | 40.6 |
| 1089 | 11v-01-PentaCapTrPr— fe2c4— 92         | -3196.0393   | 40.6 |
| 1090 | 11v-01-PentaCapTrPr— fe2c4— 74         | -3196.039296 | 40.6 |
| 1091 | 11v-04-Icos-1vx— fe2c4— 2971           | -3196.039282 | 40.6 |
| 1092 | 11v-03-OhfusettoPentBipyr— fe2c4— 1001 | -3196.039188 | 40.6 |
| 1093 | 11v-03-OhfusettoPentBipyr— fe2c4— 974  | -3196.039188 | 40.6 |
| 1094 | 11v-04-Icos-1vx— fe2c4— 3001           | -3196.039042 | 40.7 |
| 1095 | 11v-03-OhfusettoPentBipyr— fe2c4— 914  | -3196.039012 | 40.7 |
| 1096 | 11v-03-OhfusettoPentBipyr— fe2c4— 734  | -3196.038992 | 40.8 |
| 1097 | 11v-04-Icos-1vx— fe2c4— 1785           | -3196.03883  | 40.9 |
| 1098 | 11v-04-Icos-1vx— fe2c4— 1790           | -3196.03883  | 40.9 |
| 1099 | 11v-04-Icos-1vx— fe2c4— 1814           | -3196.038816 | 40.9 |
| 1100 | 11v-04-Icos-1vx— fe2c4— 3158           | -3196.03872  | 40.9 |
| 1101 | 11v-01-PentaCapTrPr— fe2c4— 42         | -3196.038704 | 40.9 |
| 1102 | 11v-01-PentaCapTrPr— fe2c4— 96         | -3196.038653 | 41.0 |
| 1103 | 11v-04-Icos-1vx— fe2c4— 3240           | -3196.038651 | 41.0 |
| 1104 | 11v-04-Icos-1vx— fe2c4— 2887           | -3196.038639 | 41.0 |
| 1105 | 11v-04-Icos-1vx— fe2c4— 1634           | -3196.038602 | 41.0 |
| 1106 | 11v-04-Icos-1vx— fe2c4— 3222           | -3196.03859  | 41.0 |
| 1107 | 11v-04-Icos-1vx— fe2c4— 3135           | -3196.038588 | 41.0 |
| 1108 | 11v-04-Icos-1vx— fe2c4— 2456           | -3196.038568 | 41.0 |
| 1109 | 11v-04-Icos-1vx— fe2c4— 2463           | -3196.038568 | 41.0 |
| 1110 | 11v-04-Icos-1vx— fe2c4— 2466           | -3196.038568 | 41.0 |
| 1111 | 11v-04-Icos-1vx— fe2c4— 3093           | -3196.038566 | 41.0 |
| 1112 | 11v-04-Icos-1vx— fe2c4— 2764           | -3196.038564 | 41.0 |
| 1113 | 11v-04-Icos-1vx— fe2c4— 3161           | -3196.038516 | 41.1 |
| 1114 | 11v-04-Icos-1vx— fe2c4— 2825           | -3196.038509 | 41.1 |
| 1115 | 11v-04-Icos-1vx— fe2c4— 2810           | -3196.038488 | 41.1 |
| 1116 | 11v-04-Icos-1vx— fe2c4— 2864           | -3196.038465 | 41.1 |
| 1117 | 11v-03-OhfusettoPentBipyr— fe2c4— 459  | -3196.038453 | 41.1 |
| 1118 | 11v-03-OhfusettoPentBipyr— fe2c4— 493  | -3196.038453 | 41.1 |
| 1119 | 11v-03-OhfusettoPentBipyr— fe2c4— 513  | -3196.038453 | 41.1 |

|      |                                      |              |      |
|------|--------------------------------------|--------------|------|
| 1120 | 11v-03-OhfusettoPentBipyr—fe2c4—522  | -3196.038453 | 41.1 |
| 1121 | 11v-04-Icos-1vx—fe2c4—1719           | -3196.038447 | 41.1 |
| 1122 | 11v-04-Icos-1vx—fe2c4—3204           | -3196.038386 | 41.1 |
| 1123 | 11v-04-Icos-1vx—fe2c4—3117           | -3196.038382 | 41.1 |
| 1124 | 11v-04-Icos-1vx—fe2c4—3140           | -3196.038379 | 41.1 |
| 1125 | 11v-04-Icos-1vx—fe2c4—3042           | -3196.038364 | 41.2 |
| 1126 | 11v-04-Icos-1vx—fe2c4—3049           | -3196.038351 | 41.2 |
| 1127 | 11v-04-Icos-1vx—fe2c4—2905           | -3196.038335 | 41.2 |
| 1128 | 11v-04-Icos-1vx—fe2c4—2871           | -3196.038338 | 41.2 |
| 1129 | 11v-04-Icos-1vx—fe2c4—1821           | -3196.038315 | 41.2 |
| 1130 | 11v-04-Icos-1vx—fe2c4—1825           | -3196.038315 | 41.2 |
| 1131 | 11v-04-Icos-1vx—fe2c4—2108           | -3196.038296 | 41.2 |
| 1132 | 11v-04-Icos-1vx—fe2c4—2452           | -3196.038266 | 41.2 |
| 1133 | 11v-04-Icos-1vx—fe2c4—2725           | -3196.038249 | 41.2 |
| 1134 | 11v-04-Icos-1vx—fe2c4—2719           | -3196.038246 | 41.2 |
| 1135 | 11v-04-Icos-1vx—fe2c4—2713           | -3196.038242 | 41.2 |
| 1136 | 11v-04-Icos-1vx—fe2c4—3255           | -3196.038202 | 41.3 |
| 1137 | 11v-04-Icos-1vx—fe2c4—1832           | -3196.03816  | 41.3 |
| 1138 | 11v-04-Icos-1vx—fe2c4—3223           | -3196.038111 | 41.3 |
| 1139 | 11v-04-Icos-1vx—fe2c4—3094           | -3196.038101 | 41.3 |
| 1140 | 11v-04-Icos-1vx—fe2c4—3177           | -3196.038096 | 41.3 |
| 1141 | 11v-04-Icos-1vx—fe2c4—3169           | -3196.038083 | 41.3 |
| 1142 | 11v-03-OhfusettoPentBipyr—fe2c4—1003 | -3196.038074 | 41.3 |
| 1143 | 11v-03-OhfusettoPentBipyr—fe2c4—1011 | -3196.038074 | 41.3 |
| 1144 | 11v-03-OhfusettoPentBipyr—fe2c4—1015 | -3196.038074 | 41.3 |
| 1145 | 11v-03-OhfusettoPentBipyr—fe2c4—1045 | -3196.038074 | 41.3 |
| 1146 | 11v-03-OhfusettoPentBipyr—fe2c4—957  | -3196.038074 | 41.3 |
| 1147 | 11v-03-OhfusettoPentBipyr—fe2c4—999  | -3196.038074 | 41.3 |
| 1148 | 11v-04-Icos-1vx—fe2c4—2568           | -3196.038055 | 41.3 |
| 1149 | 11v-04-Icos-1vx—fe2c4—2487           | -3196.037986 | 41.4 |
| 1150 | 11v-04-Icos-1vx—fe2c4—3238           | -3196.037945 | 41.4 |
| 1151 | 11v-04-Icos-1vx—fe2c4—2727           | -3196.03794  | 41.4 |
| 1152 | 11v-04-Icos-1vx—fe2c4—2740           | -3196.03794  | 41.4 |
| 1153 | 11v-04-Icos-1vx—fe2c4—2691           | -3196.037938 | 41.4 |
| 1154 | 11v-04-Icos-1vx—fe2c4—2704           | -3196.037938 | 41.4 |
| 1155 | 11v-04-Icos-1vx—fe2c4—2695           | -3196.037937 | 41.4 |
| 1156 | 11v-01-PentaCapTrPr—fe2c4—121        | -3196.037936 | 41.4 |
| 1157 | 11v-01-PentaCapTrPr—fe2c4—136        | -3196.037936 | 41.4 |
| 1158 | 11v-01-PentaCapTrPr—fe2c4—142        | -3196.037936 | 41.4 |
| 1159 | 11v-04-Icos-1vx—fe2c4—2184           | -3196.037934 | 41.4 |
| 1160 | 11v-03-OhfusettoPentBipyr—fe2c4—1163 | -3196.03792  | 41.4 |
| 1161 | 11v-04-Icos-1vx—fe2c4—2202           | -3196.0379   | 41.4 |
| 1162 | 11v-01-PentaCapTrPr—fe2c4—153        | -3196.037832 | 41.5 |
| 1163 | 11v-04-Icos-1vx—fe2c4—2726           | -3196.03779  | 41.5 |
| 1164 | 11v-04-Icos-1vx—fe2c4—2667           | -3196.037789 | 41.5 |
| 1165 | 11v-03-OhfusettoPentBipyr—fe2c4—1224 | -3196.037781 | 41.5 |
| 1166 | 11v-04-Icos-1vx—fe2c4—2680           | -3196.037774 | 41.5 |
| 1167 | 11v-04-Icos-1vx—fe2c4—2671           | -3196.037768 | 41.5 |
| 1168 | 11v-03-OhfusettoPentBipyr—fe2c4—1197 | -3196.037756 | 41.5 |
| 1169 | 11v-04-Icos-1vx—fe2c4—1643           | -3196.037706 | 41.6 |
| 1170 | 11v-01-PentaCapTrPr—fe2c4—155        | -3196.037687 | 41.6 |

|      |                          |       |      |              |      |
|------|--------------------------|-------|------|--------------|------|
| 1171 | 11v-04-Icos-1vx          | fe2c4 | 3254 | -3196.037635 | 41.6 |
| 1172 | 11v-04-Icos-1vx          | fe2c4 | 2564 | -3196.03752  | 41.7 |
| 1173 | 11v-04-Icos-1vx          | fe2c4 | 2427 | -3196.037475 | 41.7 |
| 1174 | 11v-04-Icos-1vx          | fe2c4 | 2484 | -3196.037434 | 41.7 |
| 1175 | 11v-04-Icos-1vx          | fe2c4 | 2409 | -3196.037431 | 41.7 |
| 1176 | 11v-04-Icos-1vx          | fe2c4 | 2247 | -3196.037418 | 41.7 |
| 1177 | 11v-04-Icos-1vx          | fe2c4 | 2253 | -3196.037413 | 41.8 |
| 1178 | 11v-04-Icos-1vx          | fe2c4 | 2167 | -3196.037346 | 41.8 |
| 1179 | 11v-04-Icos-1vx          | fe2c4 | 2173 | -3196.037346 | 41.8 |
| 1180 | 11v-04-Icos-1vx          | fe2c4 | 3016 | -3196.037307 | 41.8 |
| 1181 | 11v-04-Icos-1vx          | fe2c4 | 3088 | -3196.037302 | 41.8 |
| 1182 | 11v-04-Icos-1vx          | fe2c4 | 3022 | -3196.037299 | 41.8 |
| 1183 | 11v-03-OhfusetoPentBipyr | fe2c4 | 563  | -3196.037283 | 41.8 |
| 1184 | 11v-04-Icos-1vx          | fe2c4 | 2001 | -3196.037245 | 41.9 |
| 1185 | 11v-04-Icos-1vx          | fe2c4 | 2007 | -3196.037131 | 41.9 |
| 1186 | 11v-04-Icos-1vx          | fe2c4 | 1867 | -3196.03698  | 42.0 |
| 1187 | 11v-04-Icos-1vx          | fe2c4 | 1583 | -3196.036894 | 42.1 |
| 1188 | 11v-04-Icos-1vx          | fe2c4 | 2696 | -3196.036846 | 42.1 |
| 1189 | 11v-04-Icos-1vx          | fe2c4 | 2705 | -3196.036844 | 42.1 |
| 1190 | 11v-02-TricapCube        | fe2c4 | 249  | -3196.036753 | 42.2 |
| 1191 | 11v-02-TricapCube        | fe2c4 | 261  | -3196.036753 | 42.2 |
| 1192 | 11v-01-PentaCapTrPr      | fe2c4 | 51   | -3196.03674  | 42.2 |
| 1193 | 11v-04-Icos-1vx          | fe2c4 | 1598 | -3196.036734 | 42.2 |
| 1194 | 11v-04-Icos-1vx          | fe2c4 | 3174 | -3196.036677 | 42.2 |
| 1195 | 11v-04-Icos-1vx          | fe2c4 | 1615 | -3196.036669 | 42.2 |
| 1196 | 11v-04-Icos-1vx          | fe2c4 | 1855 | -3196.036511 | 42.3 |
| 1197 | 11v-04-Icos-1vx          | fe2c4 | 1939 | -3196.036511 | 42.3 |
| 1198 | 11v-04-Icos-1vx          | fe2c4 | 3031 | -3196.036471 | 42.3 |
| 1199 | 11v-04-Icos-1vx          | fe2c4 | 3043 | -3196.036432 | 42.4 |
| 1200 | 11v-04-Icos-1vx          | fe2c4 | 2834 | -3196.036424 | 42.4 |
| 1201 | 11v-04-Icos-1vx          | fe2c4 | 2973 | -3196.036409 | 42.4 |
| 1202 | 11v-04-Icos-1vx          | fe2c4 | 2797 | -3196.036408 | 42.4 |
| 1203 | 11v-04-Icos-1vx          | fe2c4 | 1908 | -3196.036273 | 42.5 |
| 1204 | 11v-04-Icos-1vx          | fe2c4 | 1933 | -3196.036273 | 42.5 |
| 1205 | 11v-04-Icos-1vx          | fe2c4 | 1849 | -3196.036271 | 42.5 |
| 1206 | 11v-04-Icos-1vx          | fe2c4 | 2763 | -3196.036226 | 42.5 |
| 1207 | 11v-04-Icos-1vx          | fe2c4 | 3122 | -3196.036221 | 42.5 |
| 1208 | 11v-04-Icos-1vx          | fe2c4 | 3116 | -3196.03622  | 42.5 |
| 1209 | 11v-04-Icos-1vx          | fe2c4 | 3192 | -3196.03622  | 42.5 |
| 1210 | 11v-04-Icos-1vx          | fe2c4 | 3098 | -3196.036206 | 42.5 |
| 1211 | 11v-04-Icos-1vx          | fe2c4 | 2603 | -3196.036078 | 42.6 |
| 1212 | 11v-04-Icos-1vx          | fe2c4 | 1670 | -3196.036037 | 42.6 |
| 1213 | 11v-04-Icos-1vx          | fe2c4 | 1676 | -3196.036037 | 42.6 |
| 1214 | 11v-04-Icos-1vx          | fe2c4 | 1685 | -3196.036037 | 42.6 |
| 1215 | 11v-01-PentaCapTrPr      | fe2c4 | 120  | -3196.036026 | 42.6 |
| 1216 | 11v-04-Icos-1vx          | fe2c4 | 3146 | -3196.035995 | 42.6 |
| 1217 | 11v-04-Icos-1vx          | fe2c4 | 3107 | -3196.035983 | 42.6 |
| 1218 | 11v-04-Icos-1vx          | fe2c4 | 3129 | -3196.035934 | 42.7 |
| 1219 | 11v-04-Icos-1vx          | fe2c4 | 3168 | -3196.035934 | 42.7 |
| 1220 | 11v-04-Icos-1vx          | fe2c4 | 3121 | -3196.035929 | 42.7 |
| 1221 | 11v-04-Icos-1vx          | fe2c4 | 3097 | -3196.035913 | 42.7 |

|      |                                        |              |      |
|------|----------------------------------------|--------------|------|
| 1222 | 11v-04-Icos-1vx— fe2c4— 2038           | -3196.035782 | 42.8 |
| 1223 | 11v-03-OhfusettoPentBipyr— fe2c4— 1103 | -3196.035726 | 42.8 |
| 1224 | 11v-04-Icos-1vx— fe2c4— 2039           | -3196.035685 | 42.8 |
| 1225 | 11v-04-Icos-1vx— fe2c4— 3134           | -3196.035631 | 42.9 |
| 1226 | 11v-04-Icos-1vx— fe2c4— 3198           | -3196.03562  | 42.9 |
| 1227 | 11v-04-Icos-1vx— fe2c4— 3261           | -3196.035529 | 42.9 |
| 1228 | 11v-04-Icos-1vx— fe2c4— 3267           | -3196.035526 | 42.9 |
| 1229 | 11v-04-Icos-1vx— fe2c4— 3090           | -3196.035519 | 42.9 |
| 1230 | 11v-04-Icos-1vx— fe2c4— 3156           | -3196.035519 | 42.9 |
| 1231 | 11v-04-Icos-1vx— fe2c4— 3132           | -3196.035513 | 42.9 |
| 1232 | 11v-04-Icos-1vx— fe2c4— 2753           | -3196.035512 | 42.9 |
| 1233 | 11v-04-Icos-1vx— fe2c4— 3102           | -3196.035501 | 43.0 |
| 1234 | 11v-04-Icos-1vx— fe2c4— 3108           | -3196.035497 | 43.0 |
| 1235 | 11v-03-OhfusettoPentBipyr— fe2c4— 1107 | -3196.035459 | 43.0 |
| 1236 | 11v-03-OhfusettoPentBipyr— fe2c4— 1118 | -3196.035459 | 43.0 |
| 1237 | 11v-04-Icos-1vx— fe2c4— 2404           | -3196.035357 | 43.0 |
| 1238 | 11v-04-Icos-1vx— fe2c4— 2434           | -3196.035346 | 43.0 |
| 1239 | 11v-04-Icos-1vx— fe2c4— 1996           | -3196.035337 | 43.1 |
| 1240 | 11v-04-Icos-1vx— fe2c4— 2505           | -3196.035331 | 43.1 |
| 1241 | 11v-04-Icos-1vx— fe2c4— 2497           | -3196.035321 | 43.1 |
| 1242 | 11v-01-PentaCapTrPr— fe2c4— 91         | -3196.035307 | 43.1 |
| 1243 | 11v-01-PentaCapTrPr— fe2c4— 98         | -3196.035264 | 43.1 |
| 1244 | 11v-01-PentaCapTrPr— fe2c4— 73         | -3196.03525  | 43.1 |
| 1245 | 11v-04-Icos-1vx— fe2c4— 3118           | -3196.035202 | 43.1 |
| 1246 | 11v-04-Icos-1vx— fe2c4— 3115           | -3196.035143 | 43.2 |
| 1247 | 11v-04-Icos-1vx— fe2c4— 3128           | -3196.035142 | 43.2 |
| 1248 | 11v-04-Icos-1vx— fe2c4— 3186           | -3196.035142 | 43.2 |
| 1249 | 11v-03-OhfusettoPentBipyr— fe2c4— 1256 | -3196.035035 | 43.2 |
| 1250 | 11v-03-OhfusettoPentBipyr— fe2c4— 1278 | -3196.035014 | 43.3 |
| 1251 | 11v-03-OhfusettoPentBipyr— fe2c4— 1290 | -3196.035014 | 43.3 |
| 1252 | 11v-04-Icos-1vx— fe2c4— 1659           | -3196.035012 | 43.3 |
| 1253 | 11v-04-Icos-1vx— fe2c4— 2633           | -3196.034999 | 43.3 |
| 1254 | 11v-04-Icos-1vx— fe2c4— 1725           | -3196.034807 | 43.4 |
| 1255 | 11v-04-Icos-1vx— fe2c4— 3092           | -3196.034777 | 43.4 |
| 1256 | 11v-04-Icos-1vx— fe2c4— 1919           | -3196.034758 | 43.4 |
| 1257 | 11v-03-OhfusettoPentBipyr— fe2c4— 1312 | -3196.034697 | 43.5 |
| 1258 | 11v-04-Icos-1vx— fe2c4— 1625           | -3196.034675 | 43.5 |
| 1259 | 11v-04-Icos-1vx— fe2c4— 1637           | -3196.034675 | 43.5 |
| 1260 | 11v-04-Icos-1vx— fe2c4— 1655           | -3196.034675 | 43.5 |
| 1261 | 11v-04-Icos-1vx— fe2c4— 2770           | -3196.034421 | 43.6 |
| 1262 | 11v-04-Icos-1vx— fe2c4— 2857           | -3196.034365 | 43.7 |
| 1263 | 11v-04-Icos-1vx— fe2c4— 2803           | -3196.034364 | 43.7 |
| 1264 | 11v-04-Icos-1vx— fe2c4— 2850           | -3196.034359 | 43.7 |
| 1265 | 11v-04-Icos-1vx— fe2c4— 2872           | -3196.034328 | 43.7 |
| 1266 | 11v-04-Icos-1vx— fe2c4— 2109           | -3196.034326 | 43.7 |
| 1267 | 11v-04-Icos-1vx— fe2c4— 2782           | -3196.034285 | 43.7 |
| 1268 | 11v-04-Icos-1vx— fe2c4— 3273           | -3196.034273 | 43.7 |
| 1269 | 11v-04-Icos-1vx— fe2c4— 2992           | -3196.034231 | 43.7 |
| 1270 | 11v-04-Icos-1vx— fe2c4— 2779           | -3196.034222 | 43.8 |
| 1271 | 11v-04-Icos-1vx— fe2c4— 2788           | -3196.034197 | 43.8 |
| 1272 | 11v-04-Icos-1vx— fe2c4— 2775           | -3196.034192 | 43.8 |

|      |                                        |              |      |
|------|----------------------------------------|--------------|------|
| 1273 | 11v-04-Icos-1vx— fe2c4— 2111           | -3196.034183 | 43.8 |
| 1274 | 11v-04-Icos-1vx— fe2c4— 2126           | -3196.034167 | 43.8 |
| 1275 | 11v-04-Icos-1vx— fe2c4— 3272           | -3196.034097 | 43.8 |
| 1276 | 11v-04-Icos-1vx— fe2c4— 2794           | -3196.034041 | 43.9 |
| 1277 | 11v-01-PentaCapTrPr— fe2c4— 166        | -3196.033858 | 44.0 |
| 1278 | 11v-03-OhfusettoPentBipyr— fe2c4— 1187 | -3196.033796 | 44.0 |
| 1279 | 11v-03-OhfusettoPentBipyr— fe2c4— 1216 | -3196.033792 | 44.0 |
| 1280 | 11v-01-PentaCapTrPr— fe2c4— 159        | -3196.033777 | 44.0 |
| 1281 | 11v-01-PentaCapTrPr— fe2c4— 167        | -3196.033747 | 44.1 |
| 1282 | 11v-03-OhfusettoPentBipyr— fe2c4— 1214 | -3196.033737 | 44.1 |
| 1283 | 11v-04-Icos-1vx— fe2c4— 2768           | -3196.033711 | 44.1 |
| 1284 | 11v-04-Icos-1vx— fe2c4— 1822           | -3196.033681 | 44.1 |
| 1285 | 11v-03-OhfusettoPentBipyr— fe2c4— 1178 | -3196.033632 | 44.1 |
| 1286 | 11v-03-OhfusettoPentBipyr— fe2c4— 1207 | -3196.033621 | 44.1 |
| 1287 | 11v-01-PentaCapTrPr— fe2c4— 75         | -3196.033555 | 44.2 |
| 1288 | 11v-04-Icos-1vx— fe2c4— 1735           | -3196.033471 | 44.2 |
| 1289 | 11v-01-PentaCapTrPr— fe2c4— 45         | -3196.033413 | 44.3 |
| 1290 | 11v-04-Icos-1vx— fe2c4— 1623           | -3196.03313  | 44.4 |
| 1291 | 11v-04-Icos-1vx— fe2c4— 1635           | -3196.03313  | 44.4 |
| 1292 | 11v-04-Icos-1vx— fe2c4— 1653           | -3196.03313  | 44.4 |
| 1293 | 11v-04-Icos-1vx— fe2c4— 1681           | -3196.03313  | 44.4 |
| 1294 | 11v-04-Icos-1vx— fe2c4— 1663           | -3196.033128 | 44.4 |
| 1295 | 11v-04-Icos-1vx— fe2c4— 1733           | -3196.033077 | 44.5 |
| 1296 | 11v-03-OhfusettoPentBipyr— fe2c4— 1329 | -3196.033028 | 44.5 |
| 1297 | 11v-03-OhfusettoPentBipyr— fe2c4— 654  | -3196.033014 | 44.5 |
| 1298 | 11v-04-Icos-1vx— fe2c4— 2394           | -3196.032964 | 44.5 |
| 1299 | 11v-04-Icos-1vx— fe2c4— 2418           | -3196.032962 | 44.5 |
| 1300 | 11v-04-Icos-1vx— fe2c4— 2430           | -3196.03296  | 44.5 |
| 1301 | 11v-03-OhfusettoPentBipyr— fe2c4— 1172 | -3196.03287  | 44.6 |
| 1302 | 11v-04-Icos-1vx— fe2c4— 2457           | -3196.032797 | 44.6 |
| 1303 | 11v-04-Icos-1vx— fe2c4— 2472           | -3196.032797 | 44.6 |
| 1304 | 11v-04-Icos-1vx— fe2c4— 2182           | -3196.032665 | 44.7 |
| 1305 | 11v-04-Icos-1vx— fe2c4— 2791           | -3196.032664 | 44.7 |
| 1306 | 11v-04-Icos-1vx— fe2c4— 2176           | -3196.032618 | 44.8 |
| 1307 | 11v-03-OhfusettoPentBipyr— fe2c4— 1021 | -3196.032597 | 44.8 |
| 1308 | 11v-04-Icos-1vx— fe2c4— 2897           | -3196.032588 | 44.8 |
| 1309 | 11v-04-Icos-1vx— fe2c4— 2170           | -3196.032547 | 44.8 |
| 1310 | 11v-01-PentaCapTrPr— fe2c4— 2          | -3196.032538 | 44.8 |
| 1311 | 11v-04-Icos-1vx— fe2c4— 1407           | -3196.032533 | 44.8 |
| 1312 | 11v-04-Icos-1vx— fe2c4— 1416           | -3196.032533 | 44.8 |
| 1313 | 11v-04-Icos-1vx— fe2c4— 3179           | -3196.032458 | 44.9 |
| 1314 | 11v-04-Icos-1vx— fe2c4— 2241           | -3196.032417 | 44.9 |
| 1315 | 11v-04-Icos-1vx— fe2c4— 2120           | -3196.032385 | 44.9 |
| 1316 | 11v-04-Icos-1vx— fe2c4— 2141           | -3196.032385 | 44.9 |
| 1317 | 11v-04-Icos-1vx— fe2c4— 2144           | -3196.032379 | 44.9 |
| 1318 | 11v-04-Icos-1vx— fe2c4— 2461           | -3196.032279 | 45.0 |
| 1319 | 11v-04-Icos-1vx— fe2c4— 2553           | -3196.032119 | 45.1 |
| 1320 | 11v-04-Icos-1vx— fe2c4— 1914           | -3196.032081 | 45.1 |
| 1321 | 11v-04-Icos-1vx— fe2c4— 2580           | -3196.032013 | 45.1 |
| 1322 | 11v-04-Icos-1vx— fe2c4— 2229           | -3196.032003 | 45.1 |
| 1323 | 11v-04-Icos-1vx— fe2c4— 2547           | -3196.031999 | 45.1 |

|      |                                       |              |      |
|------|---------------------------------------|--------------|------|
| 1324 | 11v-04-Icos-1vx— fe2c4— 3275          | -3196.031839 | 45.2 |
| 1325 | 11v-04-Icos-1vx— fe2c4— 2598          | -3196.031828 | 45.3 |
| 1326 | 11v-01-PentaCapTrPr— fe2c4— 15        | -3196.031821 | 45.3 |
| 1327 | 11v-04-Icos-1vx— fe2c4— 2616          | -3196.03182  | 45.3 |
| 1328 | 11v-04-Icos-1vx— fe2c4— 2730          | -3196.031818 | 45.3 |
| 1329 | 11v-04-Icos-1vx— fe2c4— 2933          | -3196.031719 | 45.3 |
| 1330 | 11v-04-Icos-1vx— fe2c4— 1667          | -3196.031718 | 45.3 |
| 1331 | 11v-04-Icos-1vx— fe2c4— 1622          | -3196.031654 | 45.4 |
| 1332 | 11v-04-Icos-1vx— fe2c4— 1631          | -3196.031654 | 45.4 |
| 1333 | 11v-04-Icos-1vx— fe2c4— 1649          | -3196.031654 | 45.4 |
| 1334 | 11v-04-Icos-1vx— fe2c4— 2752          | -3196.031645 | 45.4 |
| 1335 | 11v-04-Icos-1vx— fe2c4— 2379          | -3196.031502 | 45.5 |
| 1336 | 11v-04-Icos-1vx— fe2c4— 2445          | -3196.031502 | 45.5 |
| 1337 | 11v-04-Icos-1vx— fe2c4— 2451          | -3196.031502 | 45.5 |
| 1338 | 11v-02-TricapCube— fe2c4— 233         | -3196.031449 | 45.5 |
| 1339 | 11v-03-OhfusettoPentBipyr— fe2c4— 696 | -3196.031388 | 45.5 |
| 1340 | 11v-03-OhfusettoPentBipyr— fe2c4— 702 | -3196.031379 | 45.5 |
| 1341 | 11v-03-OhfusettoPentBipyr— fe2c4— 780 | -3196.031365 | 45.5 |
| 1342 | 11v-04-Icos-1vx— fe2c4— 2935          | -3196.031308 | 45.6 |
| 1343 | 11v-04-Icos-1vx— fe2c4— 2960          | -3196.031279 | 45.6 |
| 1344 | 11v-04-Icos-1vx— fe2c4— 2392          | -3196.031266 | 45.6 |
| 1345 | 11v-04-Icos-1vx— fe2c4— 1727          | -3196.031258 | 45.6 |
| 1346 | 11v-04-Icos-1vx— fe2c4— 2398          | -3196.031246 | 45.6 |
| 1347 | 11v-04-Icos-1vx— fe2c4— 2745          | -3196.031216 | 45.6 |
| 1348 | 11v-04-Icos-1vx— fe2c4— 2653          | -3196.031208 | 45.6 |
| 1349 | 11v-04-Icos-1vx— fe2c4— 1789          | -3196.031194 | 45.7 |
| 1350 | 11v-04-Icos-1vx— fe2c4— 1795          | -3196.031194 | 45.7 |
| 1351 | 11v-04-Icos-1vx— fe2c4— 3235          | -3196.031187 | 45.7 |
| 1352 | 11v-04-Icos-1vx— fe2c4— 3229          | -3196.031185 | 45.7 |
| 1353 | 11v-04-Icos-1vx— fe2c4— 1708          | -3196.03117  | 45.7 |
| 1354 | 11v-04-Icos-1vx— fe2c4— 3264          | -3196.031162 | 45.7 |
| 1355 | 11v-04-Icos-1vx— fe2c4— 1791          | -3196.031156 | 45.7 |
| 1356 | 11v-04-Icos-1vx— fe2c4— 1803          | -3196.031156 | 45.7 |
| 1357 | 11v-04-Icos-1vx— fe2c4— 2378          | -3196.030761 | 45.9 |
| 1358 | 11v-04-Icos-1vx— fe2c4— 2444          | -3196.030761 | 45.9 |
| 1359 | 11v-04-Icos-1vx— fe2c4— 2450          | -3196.030761 | 45.9 |
| 1360 | 11v-04-Icos-1vx— fe2c4— 2460          | -3196.030761 | 45.9 |
| 1361 | 11v-04-Icos-1vx— fe2c4— 2048          | -3196.030757 | 45.9 |
| 1362 | 11v-04-Icos-1vx— fe2c4— 2879          | -3196.030574 | 46.0 |
| 1363 | 11v-04-Icos-1vx— fe2c4— 2221          | -3196.030542 | 46.1 |
| 1364 | 11v-04-Icos-1vx— fe2c4— 2381          | -3196.030499 | 46.1 |
| 1365 | 11v-04-Icos-1vx— fe2c4— 2724          | -3196.030481 | 46.1 |
| 1366 | 11v-04-Icos-1vx— fe2c4— 2731          | -3196.03048  | 46.1 |
| 1367 | 11v-01-PentaCapTrPr— fe2c4— 24        | -3196.03036  | 46.2 |
| 1368 | 11v-04-Icos-1vx— fe2c4— 2742          | -3196.030358 | 46.2 |
| 1369 | 11v-04-Icos-1vx— fe2c4— 2866          | -3196.030202 | 46.3 |
| 1370 | 11v-04-Icos-1vx— fe2c4— 1586          | -3196.030106 | 46.3 |
| 1371 | 11v-04-Icos-1vx— fe2c4— 1862          | -3196.030095 | 46.3 |
| 1372 | 11v-04-Icos-1vx— fe2c4— 1892          | -3196.030095 | 46.3 |
| 1373 | 11v-04-Icos-1vx— fe2c4— 1574          | -3196.030087 | 46.3 |
| 1374 | 11v-04-Icos-1vx— fe2c4— 1613          | -3196.030044 | 46.4 |

|      |                                       |              |      |
|------|---------------------------------------|--------------|------|
| 1375 | 11v-04-Icos-1vx— fe2c4—1947           | -3196.029949 | 46.4 |
| 1376 | 11v-03-OhfusettoPentBipyr— fe2c4—452  | -3196.029924 | 46.5 |
| 1377 | 11v-03-OhfusettoPentBipyr— fe2c4—470  | -3196.029924 | 46.5 |
| 1378 | 11v-03-OhfusettoPentBipyr— fe2c4—464  | -3196.029922 | 46.5 |
| 1379 | 11v-03-OhfusettoPentBipyr— fe2c4—530  | -3196.02992  | 46.5 |
| 1380 | 11v-04-Icos-1vx— fe2c4—2376           | -3196.029872 | 46.5 |
| 1381 | 11v-04-Icos-1vx— fe2c4—2442           | -3196.029872 | 46.5 |
| 1382 | 11v-04-Icos-1vx— fe2c4—2448           | -3196.029872 | 46.5 |
| 1383 | 11v-04-Icos-1vx— fe2c4—2639           | -3196.029867 | 46.5 |
| 1384 | 11v-04-Icos-1vx— fe2c4—3124           | -3196.029818 | 46.5 |
| 1385 | 11v-04-Icos-1vx— fe2c4—2760           | -3196.029752 | 46.6 |
| 1386 | 11v-04-Icos-1vx— fe2c4—2786           | -3196.029752 | 46.6 |
| 1387 | 11v-04-Icos-1vx— fe2c4—2750           | -3196.029736 | 46.6 |
| 1388 | 11v-04-Icos-1vx— fe2c4—2744           | -3196.029639 | 46.6 |
| 1389 | 11v-04-Icos-1vx— fe2c4—2774           | -3196.029586 | 46.7 |
| 1390 | 11v-03-OhfusettoPentBipyr— fe2c4—695  | -3196.029581 | 46.7 |
| 1391 | 11v-04-Icos-1vx— fe2c4—2761           | -3196.029579 | 46.7 |
| 1392 | 11v-03-OhfusettoPentBipyr— fe2c4—701  | -3196.029574 | 46.7 |
| 1393 | 11v-03-OhfusettoPentBipyr— fe2c4—1332 | -3196.029532 | 46.7 |
| 1394 | 11v-04-Icos-1vx— fe2c4—2884           | -3196.029473 | 46.7 |
| 1395 | 11v-01-PentaCapTrPr— fe2c4—49         | -3196.029418 | 46.8 |
| 1396 | 11v-01-PentaCapTrPr— fe2c4—118        | -3196.029337 | 46.8 |
| 1397 | 11v-04-Icos-1vx— fe2c4—1817           | -3196.029317 | 46.8 |
| 1398 | 11v-04-Icos-1vx— fe2c4—1829           | -3196.029317 | 46.8 |
| 1399 | 11v-04-Icos-1vx— fe2c4—1913           | -3196.029121 | 47.0 |
| 1400 | 11v-01-PentaCapTrPr— fe2c4—4          | -3196.029108 | 47.0 |
| 1401 | 11v-01-PentaCapTrPr— fe2c4—57         | -3196.029106 | 47.0 |
| 1402 | 11v-04-Icos-1vx— fe2c4—2000           | -3196.029102 | 47.0 |
| 1403 | 11v-04-Icos-1vx— fe2c4—1955           | -3196.029095 | 47.0 |
| 1404 | 11v-04-Icos-1vx— fe2c4—2976           | -3196.029083 | 47.0 |
| 1405 | 11v-04-Icos-1vx— fe2c4—2924           | -3196.029079 | 47.0 |
| 1406 | 11v-04-Icos-1vx— fe2c4—3068           | -3196.029079 | 47.0 |
| 1407 | 11v-03-OhfusettoPentBipyr— fe2c4—1032 | -3196.028996 | 47.0 |
| 1408 | 11v-03-OhfusettoPentBipyr— fe2c4—1236 | -3196.028889 | 47.1 |
| 1409 | 11v-03-OhfusettoPentBipyr— fe2c4—758  | -3196.028737 | 47.2 |
| 1410 | 11v-01-PentaCapTrPr— fe2c4—28         | -3196.028694 | 47.2 |
| 1411 | 11v-03-OhfusettoPentBipyr— fe2c4—1068 | -3196.028622 | 47.3 |
| 1412 | 11v-03-OhfusettoPentBipyr— fe2c4—1128 | -3196.028616 | 47.3 |
| 1413 | 11v-01-PentaCapTrPr— fe2c4—29         | -3196.028587 | 47.3 |
| 1414 | 11v-04-Icos-1vx— fe2c4—2060           | -3196.028549 | 47.3 |
| 1415 | 11v-03-OhfusettoPentBipyr— fe2c4—1059 | -3196.028528 | 47.3 |
| 1416 | 11v-03-OhfusettoPentBipyr— fe2c4—1080 | -3196.028528 | 47.3 |
| 1417 | 11v-03-OhfusettoPentBipyr— fe2c4—1119 | -3196.028528 | 47.3 |
| 1418 | 11v-03-OhfusettoPentBipyr— fe2c4—1096 | -3196.028504 | 47.3 |
| 1419 | 11v-04-Icos-1vx— fe2c4—1786           | -3196.028447 | 47.4 |
| 1420 | 11v-04-Icos-1vx— fe2c4—3142           | -3196.028369 | 47.4 |
| 1421 | 11v-02-TricapCube— fe2c4—235          | -3196.028109 | 47.6 |
| 1422 | 11v-02-TricapCube— fe2c4—290          | -3196.028109 | 47.6 |
| 1423 | 11v-02-TricapCube— fe2c4—296          | -3196.028109 | 47.6 |
| 1424 | 11v-02-TricapCube— fe2c4—271          | -3196.02809  | 47.6 |
| 1425 | 11v-02-TricapCube— fe2c4—289          | -3196.02809  | 47.6 |



|      |                                     |              |      |
|------|-------------------------------------|--------------|------|
| 1426 | 11v-02-TricapCube—fe2c4—314         | -3196.02809  | 47.6 |
| 1427 | 11v-04-Icos-1vx—fe2c4—2087          | -3196.028037 | 47.6 |
| 1428 | 11v-04-Icos-1vx—fe2c4—2453          | -3196.027897 | 47.7 |
| 1429 | 11v-04-Icos-1vx—fe2c4—2462          | -3196.027897 | 47.7 |
| 1430 | 11v-04-Icos-1vx—fe2c4—1448          | -3196.027849 | 47.8 |
| 1431 | 11v-04-Icos-1vx—fe2c4—1572          | -3196.027849 | 47.8 |
| 1432 | 11v-04-Icos-1vx—fe2c4—1610          | -3196.027849 | 47.8 |
| 1433 | 11v-04-Icos-1vx—fe2c4—2921          | -3196.027749 | 47.8 |
| 1434 | 11v-02-TricapCubeA—fe2c4—209        | -3196.027652 | 47.9 |
| 1435 | 11v-01-PentaCapTrPr—fe2c4—50        | -3196.027622 | 47.9 |
| 1436 | 11v-01-PentaCapTrPr—fe2c4—56        | -3196.027622 | 47.9 |
| 1437 | 11v-01-PentaCapTrPr—fe2c4—131       | -3196.027534 | 48.0 |
| 1438 | 11v-04-Icos-1vx—fe2c4—2723          | -3196.027494 | 48.0 |
| 1439 | 11v-04-Icos-1vx—fe2c4—2230          | -3196.027453 | 48.0 |
| 1440 | 11v-01-PentaCapTrPr—fe2c4—128       | -3196.027444 | 48.0 |
| 1441 | 11v-04-Icos-1vx—fe2c4—2927          | -3196.027419 | 48.0 |
| 1442 | 11v-04-Icos-1vx—fe2c4—2995          | -3196.027349 | 48.1 |
| 1443 | 11v-04-Icos-1vx—fe2c4—2988          | -3196.027346 | 48.1 |
| 1444 | 11v-04-Icos-1vx—fe2c4—3056          | -3196.027344 | 48.1 |
| 1445 | 11v-04-Icos-1vx—fe2c4—2918          | -3196.027339 | 48.1 |
| 1446 | 11v-04-Icos-1vx—fe2c4—2828          | -3196.027275 | 48.1 |
| 1447 | 11v-04-Icos-1vx—fe2c4—2545          | -3196.027236 | 48.1 |
| 1448 | 11v-04-Icos-1vx—fe2c4—2562          | -3196.027235 | 48.1 |
| 1449 | 11v-04-Icos-1vx—fe2c4—2551          | -3196.027234 | 48.1 |
| 1450 | 11v-04-Icos-1vx—fe2c4—2299          | -3196.027116 | 48.2 |
| 1451 | 11v-02-TricapCube—fe2c4—231         | -3196.027115 | 48.2 |
| 1452 | 11v-02-TricapCube—fe2c4—243         | -3196.027111 | 48.2 |
| 1453 | 11v-04-Icos-1vx—fe2c4—2674          | -3196.027074 | 48.2 |
| 1454 | 11v-04-Icos-1vx—fe2c4—2662          | -3196.02707  | 48.2 |
| 1455 | 11v-04-Icos-1vx—fe2c4—2650          | -3196.027059 | 48.2 |
| 1456 | 11v-04-Icos-1vx—fe2c4—3104          | -3196.027027 | 48.3 |
| 1457 | 11v-04-Icos-1vx—fe2c4—3114          | -3196.027025 | 48.3 |
| 1458 | 11v-04-Icos-1vx—fe2c4—2632          | -3196.027018 | 48.3 |
| 1459 | 11v-04-Icos-1vx—fe2c4—3110          | -3196.027017 | 48.3 |
| 1460 | 11v-04-Icos-1vx—fe2c4—2777          | -3196.027015 | 48.3 |
| 1461 | 11v-04-Icos-1vx—fe2c4—2585          | -3196.02694  | 48.3 |
| 1462 | 11v-04-Icos-1vx—fe2c4—3253          | -3196.026939 | 48.3 |
| 1463 | 11v-04-Icos-1vx—fe2c4—2597          | -3196.026924 | 48.3 |
| 1464 | 11v-04-Icos-1vx—fe2c4—1887          | -3196.026699 | 48.5 |
| 1465 | 11v-04-Icos-1vx—fe2c4—1905          | -3196.026573 | 48.6 |
| 1466 | 11v-04-Icos-1vx—fe2c4—2218          | -3196.026499 | 48.6 |
| 1467 | 11v-04-Icos-1vx—fe2c4—2759          | -3196.026419 | 48.6 |
| 1468 | 11v-03-OhfusettoPentBipyr—fe2c4—664 | -3196.026389 | 48.7 |
| 1469 | 11v-04-Icos-1vx—fe2c4—2561          | -3196.026387 | 48.7 |
| 1470 | 11v-03-OhfusettoPentBipyr—fe2c4—663 | -3196.026233 | 48.8 |
| 1471 | 11v-01-PentaCapTrPr—fe2c4—76        | -3196.026171 | 48.8 |
| 1472 | 11v-01-PentaCapTrPr—fe2c4—10        | -3196.026166 | 48.8 |
| 1473 | 11v-04-Icos-1vx—fe2c4—1743          | -3196.026104 | 48.8 |
| 1474 | 11v-03-OhfusettoPentBipyr—fe2c4—929 | -3196.026018 | 48.9 |
| 1475 | 11v-03-OhfusettoPentBipyr—fe2c4—517 | -3196.025975 | 48.9 |
| 1476 | 11v-03-OhfusettoPentBipyr—fe2c4—523 | -3196.025975 | 48.9 |

|      |                                          |              |      |
|------|------------------------------------------|--------------|------|
| 1477 | 11v-03-OhfusettoPentBipyr — fe2c4 — 553  | -3196.025975 | 48.9 |
| 1478 | 11v-02-TricapCubeA — fe2c4 — 198         | -3196.025947 | 48.9 |
| 1479 | 11v-03-OhfusettoPentBipyr — fe2c4 — 1287 | -3196.025802 | 49.0 |
| 1480 | 11v-03-OhfusettoPentBipyr — fe2c4 — 1153 | -3196.025793 | 49.0 |
| 1481 | 11v-04-Icos-1vx — fe2c4 — 3212           | -3196.025695 | 49.1 |
| 1482 | 11v-04-Icos-1vx — fe2c4 — 3194           | -3196.02569  | 49.1 |
| 1483 | 11v-04-Icos-1vx — fe2c4 — 3206           | -3196.025687 | 49.1 |
| 1484 | 11v-03-OhfusettoPentBipyr — fe2c4 — 1162 | -3196.025672 | 49.1 |
| 1485 | 11v-03-OhfusettoPentBipyr — fe2c4 — 1179 | -3196.025672 | 49.1 |
| 1486 | 11v-03-OhfusettoPentBipyr — fe2c4 — 1188 | -3196.025666 | 49.1 |
| 1487 | 11v-03-OhfusettoPentBipyr — fe2c4 — 1173 | -3196.025646 | 49.1 |
| 1488 | 11v-03-OhfusettoPentBipyr — fe2c4 — 1161 | -3196.025605 | 49.2 |
| 1489 | 11v-04-Icos-1vx — fe2c4 — 2575           | -3196.025477 | 49.2 |
| 1490 | 11v-04-Icos-1vx — fe2c4 — 2399           | -3196.025418 | 49.3 |
| 1491 | 11v-04-Icos-1vx — fe2c4 — 1461           | -3196.025276 | 49.4 |
| 1492 | 11v-04-Icos-1vx — fe2c4 — 1472           | -3196.025276 | 49.4 |
| 1493 | 11v-04-Icos-1vx — fe2c4 — 1544           | -3196.025276 | 49.4 |
| 1494 | 11v-04-Icos-1vx — fe2c4 — 1571           | -3196.025276 | 49.4 |
| 1495 | 11v-04-Icos-1vx — fe2c4 — 2293           | -3196.025258 | 49.4 |
| 1496 | 11v-04-Icos-1vx — fe2c4 — 3252           | -3196.025203 | 49.4 |
| 1497 | 11v-02-TricapCube — fe2c4 — 254          | -3196.02477  | 49.7 |
| 1498 | 11v-03-OhfusettoPentBipyr — fe2c4 — 1046 | -3196.024768 | 49.7 |
| 1499 | 11v-04-Icos-1vx — fe2c4 — 1756           | -3196.024729 | 49.7 |
| 1500 | 11v-04-Icos-1vx — fe2c4 — 1797           | -3196.024729 | 49.7 |
| 1501 | 11v-04-Icos-1vx — fe2c4 — 1801           | -3196.024729 | 49.7 |
| 1502 | 11v-04-Icos-1vx — fe2c4 — 1833           | -3196.024729 | 49.7 |
| 1503 | 11v-04-Icos-1vx — fe2c4 — 2219           | -3196.024728 | 49.7 |
| 1504 | 11v-04-Icos-1vx — fe2c4 — 2213           | -3196.024703 | 49.7 |
| 1505 | 11v-03-OhfusettoPentBipyr — fe2c4 — 647  | -3196.024673 | 49.7 |
| 1506 | 11v-03-OhfusettoPentBipyr — fe2c4 — 641  | -3196.02467  | 49.7 |
| 1507 | 11v-04-Icos-1vx — fe2c4 — 1831           | -3196.024496 | 49.9 |
| 1508 | 11v-04-Icos-1vx — fe2c4 — 2975           | -3196.024358 | 49.9 |
| 1509 | 11v-03-OhfusettoPentBipyr — fe2c4 — 1238 | -3196.024234 | 50.0 |
| 1510 | 11v-04-Icos-1vx — fe2c4 — 2554           | -3196.024203 | 50.0 |
| 1511 | 11v-04-Icos-1vx — fe2c4 — 3101           | -3196.024201 | 50.0 |
| 1512 | 11v-03-OhfusettoPentBipyr — fe2c4 — 476  | -3196.023868 | 50.3 |
| 1513 | 11v-03-OhfusettoPentBipyr — fe2c4 — 536  | -3196.023867 | 50.3 |
| 1514 | 11v-04-Icos-1vx — fe2c4 — 2159           | -3196.023864 | 50.3 |
| 1515 | 11v-04-Icos-1vx — fe2c4 — 2566           | -3196.023837 | 50.3 |
| 1516 | 11v-04-Icos-1vx — fe2c4 — 2424           | -3196.023781 | 50.3 |
| 1517 | 11v-04-Icos-1vx — fe2c4 — 2419           | -3196.023775 | 50.3 |
| 1518 | 11v-04-Icos-1vx — fe2c4 — 2255           | -3196.023653 | 50.4 |
| 1519 | 11v-03-OhfusettoPentBipyr — fe2c4 — 1310 | -3196.023512 | 50.5 |
| 1520 | 11v-03-OhfusettoPentBipyr — fe2c4 — 1335 | -3196.023512 | 50.5 |
| 1521 | 11v-04-Icos-1vx — fe2c4 — 2240           | -3196.023396 | 50.5 |
| 1522 | 11v-04-Icos-1vx — fe2c4 — 2164           | -3196.023395 | 50.5 |
| 1523 | 11v-04-Icos-1vx — fe2c4 — 2837           | -3196.023349 | 50.6 |
| 1524 | 11v-04-Icos-1vx — fe2c4 — 2842           | -3196.023328 | 50.6 |
| 1525 | 11v-04-Icos-1vx — fe2c4 — 2151           | -3196.023239 | 50.6 |
| 1526 | 11v-04-Icos-1vx — fe2c4 — 2204           | -3196.023227 | 50.7 |
| 1527 | 11v-04-Icos-1vx — fe2c4 — 1899           | -3196.023186 | 50.7 |

|      |                                        |              |      |
|------|----------------------------------------|--------------|------|
| 1528 | 11v-04-Icos-1vx— fe2c4— 1843           | -3196.023185 | 50.7 |
| 1529 | 11v-04-Icos-1vx— fe2c4— 1902           | -3196.023185 | 50.7 |
| 1530 | 11v-04-Icos-1vx— fe2c4— 1927           | -3196.023185 | 50.7 |
| 1531 | 11v-03-OhfusettoPentBipyr— fe2c4— 1228 | -3196.02308  | 50.7 |
| 1532 | 11v-04-Icos-1vx— fe2c4— 1620           | -3196.022981 | 50.8 |
| 1533 | 11v-04-Icos-1vx— fe2c4— 1629           | -3196.022981 | 50.8 |
| 1534 | 11v-04-Icos-1vx— fe2c4— 1647           | -3196.022981 | 50.8 |
| 1535 | 11v-04-Icos-1vx— fe2c4— 2118           | -3196.022807 | 50.9 |
| 1536 | 11v-04-Icos-1vx— fe2c4— 2138           | -3196.022807 | 50.9 |
| 1537 | 11v-04-Icos-1vx— fe2c4— 2114           | -3196.022806 | 50.9 |
| 1538 | 11v-04-Icos-1vx— fe2c4— 2587           | -3196.0226   | 51.0 |
| 1539 | 11v-04-Icos-1vx— fe2c4— 2563           | -3196.022586 | 51.1 |
| 1540 | 11v-04-Icos-1vx— fe2c4— 2421           | -3196.022573 | 51.1 |
| 1541 | 11v-04-Icos-1vx— fe2c4— 2406           | -3196.022571 | 51.1 |
| 1542 | 11v-01-PentaCapTrPr— fe2c4— 191        | -3196.022407 | 51.2 |
| 1543 | 11v-01-PentaCapTrPr— fe2c4— 32         | -3196.022389 | 51.2 |
| 1544 | 11v-04-Icos-1vx— fe2c4— 2812           | -3196.022228 | 51.3 |
| 1545 | 11v-04-Icos-1vx— fe2c4— 2153           | -3196.022115 | 51.4 |
| 1546 | 11v-03-OhfusettoPentBipyr— fe2c4— 1245 | -3196.022046 | 51.4 |
| 1547 | 11v-04-Icos-1vx— fe2c4— 2844           | -3196.022007 | 51.4 |
| 1548 | 11v-04-Icos-1vx— fe2c4— 2804           | -3196.022004 | 51.4 |
| 1549 | 11v-04-Icos-1vx— fe2c4— 2858           | -3196.022001 | 51.4 |
| 1550 | 11v-03-OhfusettoPentBipyr— fe2c4— 1254 | -3196.021812 | 51.5 |
| 1551 | 11v-04-Icos-1vx— fe2c4— 2792           | -3196.021731 | 51.6 |
| 1552 | 11v-04-Icos-1vx— fe2c4— 2796           | -3196.021699 | 51.6 |
| 1553 | 11v-04-Icos-1vx— fe2c4— 1575           | -3196.021684 | 51.6 |
| 1554 | 11v-04-Icos-1vx— fe2c4— 1604           | -3196.021681 | 51.6 |
| 1555 | 11v-03-OhfusettoPentBipyr— fe2c4— 784  | -3196.021666 | 51.6 |
| 1556 | 11v-04-Icos-1vx— fe2c4— 2795           | -3196.02165  | 51.6 |
| 1557 | 11v-04-Icos-1vx— fe2c4— 2193           | -3196.021283 | 51.9 |
| 1558 | 11v-04-Icos-1vx— fe2c4— 2197           | -3196.021222 | 51.9 |
| 1559 | 11v-04-Icos-1vx— fe2c4— 2560           | -3196.02118  | 51.9 |
| 1560 | 11v-01-PentaCapTrPr— fe2c4— 117        | -3196.021055 | 52.0 |
| 1561 | 11v-04-Icos-1vx— fe2c4— 2751           | -3196.020868 | 52.1 |
| 1562 | 11v-04-Icos-1vx— fe2c4— 3171           | -3196.020849 | 52.1 |
| 1563 | 11v-04-Icos-1vx— fe2c4— 3183           | -3196.020844 | 52.1 |
| 1564 | 11v-04-Icos-1vx— fe2c4— 3213           | -3196.020843 | 52.1 |
| 1565 | 11v-04-Icos-1vx— fe2c4— 2192           | -3196.020826 | 52.2 |
| 1566 | 11v-04-Icos-1vx— fe2c4— 2215           | -3196.020812 | 52.2 |
| 1567 | 11v-04-Icos-1vx— fe2c4— 2843           | -3196.020757 | 52.2 |
| 1568 | 11v-04-Icos-1vx— fe2c4— 2200           | -3196.020676 | 52.3 |
| 1569 | 11v-04-Icos-1vx— fe2c4— 3239           | -3196.020655 | 52.3 |
| 1570 | 11v-03-OhfusettoPentBipyr— fe2c4— 1315 | -3196.020642 | 52.3 |
| 1571 | 11v-04-Icos-1vx— fe2c4— 3076           | -3196.020637 | 52.3 |
| 1572 | 11v-03-OhfusettoPentBipyr— fe2c4— 1324 | -3196.020629 | 52.3 |
| 1573 | 11v-04-Icos-1vx— fe2c4— 2956           | -3196.020609 | 52.3 |
| 1574 | 11v-04-Icos-1vx— fe2c4— 3010           | -3196.020602 | 52.3 |
| 1575 | 11v-04-Icos-1vx— fe2c4— 2944           | -3196.020594 | 52.3 |
| 1576 | 11v-01-PentaCapTrPr— fe2c4— 33         | -3196.02059  | 52.3 |
| 1577 | 11v-04-Icos-1vx— fe2c4— 2778           | -3196.020563 | 52.3 |
| 1578 | 11v-04-Icos-1vx— fe2c4— 2787           | -3196.02056  | 52.3 |

|      |                                        |              |      |
|------|----------------------------------------|--------------|------|
| 1579 | 11v-04-Icos-1vx— fe2c4— 1464           | -3196.020556 | 52.3 |
| 1580 | 11v-04-Icos-1vx— fe2c4— 1425           | -3196.020552 | 52.3 |
| 1581 | 11v-04-Icos-1vx— fe2c4— 1563           | -3196.020552 | 52.3 |
| 1582 | 11v-04-Icos-1vx— fe2c4— 1437           | -3196.020551 | 52.3 |
| 1583 | 11v-04-Icos-1vx— fe2c4— 1476           | -3196.020555 | 52.3 |
| 1584 | 11v-04-Icos-1vx— fe2c4— 2295           | -3196.020529 | 52.3 |
| 1585 | 11v-04-Icos-1vx— fe2c4— 2605           | -3196.020528 | 52.3 |
| 1586 | 11v-04-Icos-1vx— fe2c4— 2620           | -3196.020517 | 52.4 |
| 1587 | 11v-03-OhfusettoPentBipyr— fe2c4— 465  | -3196.020508 | 52.4 |
| 1588 | 11v-03-OhfusettoPentBipyr— fe2c4— 531  | -3196.020508 | 52.4 |
| 1589 | 11v-04-Icos-1vx— fe2c4— 2242           | -3196.020503 | 52.4 |
| 1590 | 11v-03-OhfusettoPentBipyr— fe2c4— 1281 | -3196.020495 | 52.4 |
| 1591 | 11v-04-Icos-1vx— fe2c4— 2212           | -3196.020482 | 52.4 |
| 1592 | 11v-04-Icos-1vx— fe2c4— 3032           | -3196.020458 | 52.4 |
| 1593 | 11v-03-OhfusettoPentBipyr— fe2c4— 1322 | -3196.020349 | 52.5 |
| 1594 | 11v-02-TricapCube— fe2c4— 324          | -3196.020347 | 52.5 |
| 1595 | 11v-04-Icos-1vx— fe2c4— 2980           | -3196.020233 | 52.5 |
| 1596 | 11v-04-Icos-1vx— fe2c4— 2938           | -3196.020211 | 52.5 |
| 1597 | 11v-03-OhfusettoPentBipyr— fe2c4— 485  | -3196.020191 | 52.6 |
| 1598 | 11v-03-OhfusettoPentBipyr— fe2c4— 551  | -3196.020191 | 52.6 |
| 1599 | 11v-04-Icos-1vx— fe2c4— 3113           | -3196.020116 | 52.6 |
| 1600 | 11v-04-Icos-1vx— fe2c4— 3260           | -3196.020099 | 52.6 |
| 1601 | 11v-03-OhfusettoPentBipyr— fe2c4— 633  | -3196.020084 | 52.6 |
| 1602 | 11v-03-OhfusettoPentBipyr— fe2c4— 656  | -3196.020084 | 52.6 |
| 1603 | 11v-03-OhfusettoPentBipyr— fe2c4— 644  | -3196.020081 | 52.6 |
| 1604 | 11v-01-PentaCapTrPr— fe2c4— 36         | -3196.020065 | 52.6 |
| 1605 | 11v-01-PentaCapTrPr— fe2c4— 119        | -3196.020034 | 52.7 |
| 1606 | 11v-04-Icos-1vx— fe2c4— 3200           | -3196.019983 | 52.7 |
| 1607 | 11v-03-OhfusettoPentBipyr— fe2c4— 883  | -3196.019975 | 52.7 |
| 1608 | 11v-04-Icos-1vx— fe2c4— 2436           | -3196.019964 | 52.7 |
| 1609 | 11v-04-Icos-1vx— fe2c4— 2538           | -3196.019964 | 52.7 |
| 1610 | 11v-04-Icos-1vx— fe2c4— 2873           | -3196.019895 | 52.7 |
| 1611 | 11v-04-Icos-1vx— fe2c4— 3224           | -3196.019838 | 52.8 |
| 1612 | 11v-04-Icos-1vx— fe2c4— 3095           | -3196.019833 | 52.8 |
| 1613 | 11v-04-Icos-1vx— fe2c4— 3193           | -3196.019833 | 52.8 |
| 1614 | 11v-04-Icos-1vx— fe2c4— 3247           | -3196.019756 | 52.8 |
| 1615 | 11v-04-Icos-1vx— fe2c4— 3242           | -3196.019746 | 52.8 |
| 1616 | 11v-03-OhfusettoPentBipyr— fe2c4— 545  | -3196.019658 | 52.9 |
| 1617 | 11v-03-OhfusettoPentBipyr— fe2c4— 569  | -3196.019658 | 52.9 |
| 1618 | 11v-01-PentaCapTrPr— fe2c4— 187        | -3196.019642 | 52.9 |
| 1619 | 11v-01-PentaCapTrPr— fe2c4— 181        | -3196.019526 | 53.0 |
| 1620 | 11v-04-Icos-1vx— fe2c4— 3248           | -3196.019453 | 53.0 |
| 1621 | 11v-04-Icos-1vx— fe2c4— 1410           | -3196.019356 | 53.1 |
| 1622 | 11v-04-Icos-1vx— fe2c4— 1422           | -3196.019325 | 53.1 |
| 1623 | 11v-04-Icos-1vx— fe2c4— 2596           | -3196.019289 | 53.1 |
| 1624 | 11v-03-OhfusettoPentBipyr— fe2c4— 741  | -3196.01925  | 53.1 |
| 1625 | 11v-03-OhfusettoPentBipyr— fe2c4— 733  | -3196.019248 | 53.1 |
| 1626 | 11v-03-OhfusettoPentBipyr— fe2c4— 742  | -3196.019248 | 53.1 |
| 1627 | 11v-04-Icos-1vx— fe2c4— 3096           | -3196.019037 | 53.3 |
| 1628 | 11v-04-Icos-1vx— fe2c4— 3120           | -3196.019036 | 53.3 |
| 1629 | 11v-04-Icos-1vx— fe2c4— 3105           | -3196.019034 | 53.3 |

|      |                                      |              |      |
|------|--------------------------------------|--------------|------|
| 1630 | 11v-04-Icos-1vx—fe2c4—3144           | -3196.019031 | 53.3 |
| 1631 | 11v-04-Icos-1vx—fe2c4—1409           | -3196.019029 | 53.3 |
| 1632 | 11v-04-Icos-1vx—fe2c4—3111           | -3196.019029 | 53.3 |
| 1633 | 11v-04-Icos-1vx—fe2c4—2807           | -3196.018961 | 53.3 |
| 1634 | 11v-04-Icos-1vx—fe2c4—2789           | -3196.018813 | 53.4 |
| 1635 | 11v-04-Icos-1vx—fe2c4—2762           | -3196.018806 | 53.4 |
| 1636 | 11v-04-Icos-1vx—fe2c4—2441           | -3196.018804 | 53.4 |
| 1637 | 11v-04-Icos-1vx—fe2c4—2780           | -3196.018802 | 53.4 |
| 1638 | 11v-04-Icos-1vx—fe2c4—3126           | -3196.018638 | 53.5 |
| 1639 | 11v-04-Icos-1vx—fe2c4—3162           | -3196.018633 | 53.5 |
| 1640 | 11v-04-Icos-1vx—fe2c4—3153           | -3196.018384 | 53.7 |
| 1641 | 11v-04-Icos-1vx—fe2c4—2826           | -3196.018249 | 53.8 |
| 1642 | 11v-03-OhfusettoPentBipyr—fe2c4—458  | -3196.018243 | 53.8 |
| 1643 | 11v-03-OhfusettoPentBipyr—fe2c4—466  | -3196.018243 | 53.8 |
| 1644 | 11v-03-OhfusettoPentBipyr—fe2c4—512  | -3196.018243 | 53.8 |
| 1645 | 11v-03-OhfusettoPentBipyr—fe2c4—521  | -3196.018243 | 53.8 |
| 1646 | 11v-03-OhfusettoPentBipyr—fe2c4—532  | -3196.018243 | 53.8 |
| 1647 | 11v-04-Icos-1vx—fe2c4—2264           | -3196.018226 | 53.8 |
| 1648 | 11v-03-OhfusettoPentBipyr—fe2c4—500  | -3196.018132 | 53.9 |
| 1649 | 11v-03-OhfusettoPentBipyr—fe2c4—560  | -3196.018131 | 53.9 |
| 1650 | 11v-03-OhfusettoPentBipyr—fe2c4—547  | -3196.018129 | 53.9 |
| 1651 | 11v-01-PentaCapTrPr—fe2c4—21         | -3196.018111 | 53.9 |
| 1652 | 11v-04-Icos-1vx—fe2c4—2257           | -3196.018109 | 53.9 |
| 1653 | 11v-04-Icos-1vx—fe2c4—2584           | -3196.01789  | 54.0 |
| 1654 | 11v-04-Icos-1vx—fe2c4—2281           | -3196.017871 | 54.0 |
| 1655 | 11v-04-Icos-1vx—fe2c4—2364           | -3196.017817 | 54.0 |
| 1656 | 11v-04-Icos-1vx—fe2c4—2259           | -3196.017702 | 54.1 |
| 1657 | 11v-03-OhfusettoPentBipyr—fe2c4—1012 | -3196.017676 | 54.1 |
| 1658 | 11v-04-Icos-1vx—fe2c4—2305           | -3196.017676 | 54.1 |
| 1659 | 11v-03-OhfusettoPentBipyr—fe2c4—1000 | -3196.017672 | 54.1 |
| 1660 | 11v-03-OhfusettoPentBipyr—fe2c4—937  | -3196.017672 | 54.1 |
| 1661 | 11v-03-OhfusettoPentBipyr—fe2c4—958  | -3196.017671 | 54.1 |
| 1662 | 11v-03-OhfusettoPentBipyr—fe2c4—973  | -3196.017662 | 54.1 |
| 1663 | 11v-03-OhfusettoPentBipyr—fe2c4—931  | -3196.017658 | 54.1 |
| 1664 | 11v-04-Icos-1vx—fe2c4—1703           | -3196.017568 | 54.2 |
| 1665 | 11v-04-Icos-1vx—fe2c4—2263           | -3196.017498 | 54.2 |
| 1666 | 11v-04-Icos-1vx—fe2c4—2270           | -3196.017367 | 54.3 |
| 1667 | 11v-04-Icos-1vx—fe2c4—2783           | -3196.017318 | 54.4 |
| 1668 | 11v-04-Icos-1vx—fe2c4—2771           | -3196.017317 | 54.4 |
| 1669 | 11v-04-Icos-1vx—fe2c4—2765           | -3196.017312 | 54.4 |
| 1670 | 11v-04-Icos-1vx—fe2c4—2485           | -3196.017305 | 54.4 |
| 1671 | 11v-04-Icos-1vx—fe2c4—2410           | -3196.017304 | 54.4 |
| 1672 | 11v-04-Icos-1vx—fe2c4—2428           | -3196.017299 | 54.4 |
| 1673 | 11v-04-Icos-1vx—fe2c4—2248           | -3196.017291 | 54.4 |
| 1674 | 11v-04-Icos-1vx—fe2c4—2499           | -3196.017289 | 54.4 |
| 1675 | 11v-04-Icos-1vx—fe2c4—2125           | -3196.016973 | 54.6 |
| 1676 | 11v-04-Icos-1vx—fe2c4—2124           | -3196.016868 | 54.6 |
| 1677 | 11v-04-Icos-1vx—fe2c4—1984           | -3196.01653  | 54.9 |
| 1678 | 11v-03-OhfusettoPentBipyr—fe2c4—1340 | -3196.016411 | 54.9 |
| 1679 | 11v-03-OhfusettoPentBipyr—fe2c4—1037 | -3196.01634  | 55.0 |
| 1680 | 11v-03-OhfusettoPentBipyr—fe2c4—995  | -3196.01634  | 55.0 |

|      |                                      |              |      |
|------|--------------------------------------|--------------|------|
| 1681 | 11v-04-Icos-1vx—fe2c4—2953           | -3196.016275 | 55.0 |
| 1682 | 11v-04-Icos-1vx—fe2c4—2961           | -3196.016273 | 55.0 |
| 1683 | 11v-04-Icos-1vx—fe2c4—2968           | -3196.016273 | 55.0 |
| 1684 | 11v-04-Icos-1vx—fe2c4—2621           | -3196.016031 | 55.2 |
| 1685 | 11v-03-OhfusettoPentBipyr—fe2c4—923  | -3196.016023 | 55.2 |
| 1686 | 11v-04-Icos-1vx—fe2c4—2606           | -3196.016015 | 55.2 |
| 1687 | 11v-03-OhfusettoPentBipyr—fe2c4—1266 | -3196.015983 | 55.2 |
| 1688 | 11v-04-Icos-1vx—fe2c4—1594           | -3196.015976 | 55.2 |
| 1689 | 11v-03-OhfusettoPentBipyr—fe2c4—1217 | -3196.015903 | 55.2 |
| 1690 | 11v-04-Icos-1vx—fe2c4—1675           | -3196.015893 | 55.3 |
| 1691 | 11v-04-Icos-1vx—fe2c4—2891           | -3196.015766 | 55.3 |
| 1692 | 11v-01-PentaCapTrPr—fe2c4—48         | -3196.015746 | 55.3 |
| 1693 | 11v-03-OhfusettoPentBipyr—fe2c4—1229 | -3196.015505 | 55.5 |
| 1694 | 11v-04-Icos-1vx—fe2c4—1910           | -3196.015451 | 55.5 |
| 1695 | 11v-04-Icos-1vx—fe2c4—1953           | -3196.015451 | 55.5 |
| 1696 | 11v-04-Icos-1vx—fe2c4—1577           | -3196.015323 | 55.6 |
| 1697 | 11v-04-Icos-1vx—fe2c4—1589           | -3196.015323 | 55.6 |
| 1698 | 11v-04-Icos-1vx—fe2c4—1607           | -3196.015323 | 55.6 |
| 1699 | 11v-04-Icos-1vx—fe2c4—2258           | -3196.015231 | 55.7 |
| 1700 | 11v-04-Icos-1vx—fe2c4—3037           | -3196.01519  | 55.7 |
| 1701 | 11v-03-OhfusettoPentBipyr—fe2c4—1202 | -3196.015154 | 55.7 |
| 1702 | 11v-03-OhfusettoPentBipyr—fe2c4—1208 | -3196.015146 | 55.7 |
| 1703 | 11v-03-OhfusettoPentBipyr—fe2c4—769  | -3196.014916 | 55.9 |
| 1704 | 11v-03-OhfusettoPentBipyr—fe2c4—477  | -3196.014856 | 55.9 |
| 1705 | 11v-04-Icos-1vx—fe2c4—1709           | -3196.014813 | 55.9 |
| 1706 | 11v-04-Icos-1vx—fe2c4—1721           | -3196.014813 | 55.9 |
| 1707 | 11v-04-Icos-1vx—fe2c4—2495           | -3196.014803 | 55.9 |
| 1708 | 11v-04-Icos-1vx—fe2c4—2525           | -3196.014798 | 55.9 |
| 1709 | 11v-04-Icos-1vx—fe2c4—2519           | -3196.014792 | 55.9 |
| 1710 | 11v-04-Icos-1vx—fe2c4—2513           | -3196.014791 | 55.9 |
| 1711 | 11v-04-Icos-1vx—fe2c4—3002           | -3196.014772 | 56.0 |
| 1712 | 11v-04-Icos-1vx—fe2c4—3038           | -3196.014771 | 56.0 |
| 1713 | 11v-04-Icos-1vx—fe2c4—3053           | -3196.01476  | 56.0 |
| 1714 | 11v-04-Icos-1vx—fe2c4—2955           | -3196.014759 | 56.0 |
| 1715 | 11v-04-Icos-1vx—fe2c4—2943           | -3196.014747 | 56.0 |
| 1716 | 11v-04-Icos-1vx—fe2c4—2489           | -3196.01474  | 56.0 |
| 1717 | 11v-02-TricapCube—fe2c4—269          | -3196.014739 | 56.0 |
| 1718 | 11v-02-TricapCube—fe2c4—275          | -3196.014739 | 56.0 |
| 1719 | 11v-04-Icos-1vx—fe2c4—2706           | -3196.014701 | 56.0 |
| 1720 | 11v-04-Icos-1vx—fe2c4—3045           | -3196.014698 | 56.0 |
| 1721 | 11v-04-Icos-1vx—fe2c4—2634           | -3196.014693 | 56.0 |
| 1722 | 11v-04-Icos-1vx—fe2c4—3035           | -3196.014691 | 56.0 |
| 1723 | 11v-04-Icos-1vx—fe2c4—3003           | -3196.014672 | 56.0 |
| 1724 | 11v-04-Icos-1vx—fe2c4—2274           | -3196.014624 | 56.1 |
| 1725 | 11v-04-Icos-1vx—fe2c4—2937           | -3196.014603 | 56.1 |
| 1726 | 11v-04-Icos-1vx—fe2c4—2942           | -3196.014597 | 56.1 |
| 1727 | 11v-04-Icos-1vx—fe2c4—3233           | -3196.014553 | 56.1 |
| 1728 | 11v-04-Icos-1vx—fe2c4—2422           | -3196.014533 | 56.1 |
| 1729 | 11v-04-Icos-1vx—fe2c4—2567           | -3196.014494 | 56.1 |
| 1730 | 11v-04-Icos-1vx—fe2c4—1581           | -3196.014344 | 56.2 |
| 1731 | 11v-04-Icos-1vx—fe2c4—1612           | -3196.014342 | 56.2 |

|      |                                        |              |      |
|------|----------------------------------------|--------------|------|
| 1732 | 11v-04-Icos-1vx— fe2c4— 1585           | -3196.01434  | 56.2 |
| 1733 | 11v-04-Icos-1vx— fe2c4— 2931           | -3196.014328 | 56.2 |
| 1734 | 11v-04-Icos-1vx— fe2c4— 1418           | -3196.014293 | 56.3 |
| 1735 | 11v-02-TricapCube— fe2c4— 242          | -3196.014255 | 56.3 |
| 1736 | 11v-04-Icos-1vx— fe2c4— 1428           | -3196.014152 | 56.3 |
| 1737 | 11v-04-Icos-1vx— fe2c4— 1554           | -3196.014152 | 56.3 |
| 1738 | 11v-04-Icos-1vx— fe2c4— 1566           | -3196.014152 | 56.3 |
| 1739 | 11v-04-Icos-1vx— fe2c4— 2494           | -3196.014105 | 56.4 |
| 1740 | 11v-03-OhfusettoPentBipyr— fe2c4— 688  | -3196.014006 | 56.4 |
| 1741 | 11v-03-OhfusettoPentBipyr— fe2c4— 754  | -3196.014004 | 56.4 |
| 1742 | 11v-03-OhfusettoPentBipyr— fe2c4— 748  | -3196.013988 | 56.5 |
| 1743 | 11v-03-OhfusettoPentBipyr— fe2c4— 691  | -3196.013986 | 56.5 |
| 1744 | 11v-04-Icos-1vx— fe2c4— 2743           | -3196.013676 | 56.6 |
| 1745 | 11v-01-PentaCapTrPr— fe2c4— 192        | -3196.013558 | 56.7 |
| 1746 | 11v-01-PentaCapTrPr— fe2c4— 178        | -3196.013496 | 56.8 |
| 1747 | 11v-03-OhfusettoPentBipyr— fe2c4— 773  | -3196.013492 | 56.8 |
| 1748 | 11v-03-OhfusettoPentBipyr— fe2c4— 673  | -3196.013261 | 56.9 |
| 1749 | 11v-04-Icos-1vx— fe2c4— 2292           | -3196.01323  | 56.9 |
| 1750 | 11v-04-Icos-1vx— fe2c4— 2316           | -3196.013228 | 56.9 |
| 1751 | 11v-04-Icos-1vx— fe2c4— 1645           | -3196.012895 | 57.1 |
| 1752 | 11v-04-Icos-1vx— fe2c4— 1650           | -3196.012895 | 57.1 |
| 1753 | 11v-04-Icos-1vx— fe2c4— 1524           | -3196.012852 | 57.2 |
| 1754 | 11v-04-Icos-1vx— fe2c4— 1531           | -3196.012851 | 57.2 |
| 1755 | 11v-04-Icos-1vx— fe2c4— 1567           | -3196.012851 | 57.2 |
| 1756 | 11v-04-Icos-1vx— fe2c4— 1441           | -3196.012847 | 57.2 |
| 1757 | 11v-04-Icos-1vx— fe2c4— 1429           | -3196.012845 | 57.2 |
| 1758 | 11v-04-Icos-1vx— fe2c4— 1652           | -3196.012793 | 57.2 |
| 1759 | 11v-04-Icos-1vx— fe2c4— 1924           | -3196.012779 | 57.2 |
| 1760 | 11v-04-Icos-1vx— fe2c4— 2512           | -3196.012725 | 57.2 |
| 1761 | 11v-04-Icos-1vx— fe2c4— 2269           | -3196.012716 | 57.2 |
| 1762 | 11v-02-TricapCube— fe2c4— 270          | -3196.012712 | 57.3 |
| 1763 | 11v-04-Icos-1vx— fe2c4— 2524           | -3196.012652 | 57.3 |
| 1764 | 11v-03-OhfusettoPentBipyr— fe2c4— 1246 | -3196.012643 | 57.3 |
| 1765 | 11v-03-OhfusettoPentBipyr— fe2c4— 1258 | -3196.012643 | 57.3 |
| 1766 | 11v-01-PentaCapTrPr— fe2c4— 125        | -3196.012622 | 57.3 |
| 1767 | 11v-03-OhfusettoPentBipyr— fe2c4— 1311 | -3196.012507 | 57.4 |
| 1768 | 11v-03-OhfusettoPentBipyr— fe2c4— 1317 | -3196.012507 | 57.4 |
| 1769 | 11v-03-OhfusettoPentBipyr— fe2c4— 1326 | -3196.012507 | 57.4 |
| 1770 | 11v-01-PentaCapTrPr— fe2c4— 165        | -3196.012463 | 57.4 |
| 1771 | 11v-01-PentaCapTrPr— fe2c4— 124        | -3196.012449 | 57.4 |
| 1772 | 11v-01-PentaCapTrPr— fe2c4— 160        | -3196.012448 | 57.4 |
| 1773 | 11v-03-OhfusettoPentBipyr— fe2c4— 1269 | -3196.012337 | 57.5 |
| 1774 | 11v-04-Icos-1vx— fe2c4— 3157           | -3196.012323 | 57.5 |
| 1775 | 11v-04-Icos-1vx— fe2c4— 2071           | -3196.0122   | 57.6 |
| 1776 | 11v-04-Icos-1vx— fe2c4— 1969           | -3196.012179 | 57.6 |
| 1777 | 11v-04-Icos-1vx— fe2c4— 2040           | -3196.012169 | 57.6 |
| 1778 | 11v-04-Icos-1vx— fe2c4— 2024           | -3196.012156 | 57.6 |
| 1779 | 11v-04-Icos-1vx— fe2c4— 1920           | -3196.012133 | 57.6 |
| 1780 | 11v-04-Icos-1vx— fe2c4— 2790           | -3196.012106 | 57.6 |
| 1781 | 11v-04-Icos-1vx— fe2c4— 2802           | -3196.012099 | 57.6 |
| 1782 | 11v-04-Icos-1vx— fe2c4— 2856           | -3196.012098 | 57.6 |

|      |                                      |              |      |
|------|--------------------------------------|--------------|------|
| 1783 | 11v-03-OhfusettoPentBipyr—fe2c4—1230 | -3196.012077 | 57.6 |
| 1784 | 11v-04-Icos-1vx—fe2c4—1945           | -3196.01207  | 57.7 |
| 1785 | 11v-04-Icos-1vx—fe2c4—1898           | -3196.012062 | 57.7 |
| 1786 | 11v-04-Icos-1vx—fe2c4—1508           | -3196.011978 | 57.7 |
| 1787 | 11v-04-Icos-1vx—fe2c4—1488           | -3196.011974 | 57.7 |
| 1788 | 11v-04-Icos-1vx—fe2c4—2275           | -3196.011972 | 57.7 |
| 1789 | 11v-01-PentaCapTrPr—fe2c4—154        | -3196.011955 | 57.7 |
| 1790 | 11v-03-OhfusettoPentBipyr—fe2c4—1160 | -3196.011878 | 57.8 |
| 1791 | 11v-03-OhfusettoPentBipyr—fe2c4—1215 | -3196.011878 | 57.8 |
| 1792 | 11v-03-OhfusettoPentBipyr—fe2c4—533  | -3196.011826 | 57.8 |
| 1793 | 11v-04-Icos-1vx—fe2c4—2306           | -3196.011803 | 57.8 |
| 1794 | 11v-04-Icos-1vx—fe2c4—1621           | -3196.011759 | 57.8 |
| 1795 | 11v-04-Icos-1vx—fe2c4—1630           | -3196.011759 | 57.8 |
| 1796 | 11v-04-Icos-1vx—fe2c4—1641           | -3196.011759 | 57.8 |
| 1797 | 11v-04-Icos-1vx—fe2c4—1648           | -3196.011759 | 57.8 |
| 1798 | 11v-04-Icos-1vx—fe2c4—2328           | -3196.011752 | 57.9 |
| 1799 | 11v-04-Icos-1vx—fe2c4—2282           | -3196.011751 | 57.9 |
| 1800 | 11v-04-Icos-1vx—fe2c4—2317           | -3196.011734 | 57.9 |
| 1801 | 11v-04-Icos-1vx—fe2c4—1723           | -3196.011638 | 57.9 |
| 1802 | 11v-03-OhfusettoPentBipyr—fe2c4—1127 | -3196.011549 | 58.0 |
| 1803 | 11v-01-PentaCapTrPr—fe2c4—80         | -3196.011526 | 58.0 |
| 1804 | 11v-02-TricapCubeA—fe2c4—201         | -3196.011492 | 58.0 |
| 1805 | 11v-04-Icos-1vx—fe2c4—1889           | -3196.01149  | 58.0 |
| 1806 | 11v-04-Icos-1vx—fe2c4—1967           | -3196.01149  | 58.0 |
| 1807 | 11v-03-OhfusettoPentBipyr—fe2c4—1113 | -3196.011488 | 58.0 |
| 1808 | 11v-03-OhfusettoPentBipyr—fe2c4—1142 | -3196.011488 | 58.0 |
| 1809 | 11v-04-Icos-1vx—fe2c4—1907           | -3196.011485 | 58.0 |
| 1810 | 11v-04-Icos-1vx—fe2c4—1925           | -3196.011483 | 58.0 |
| 1811 | 11v-04-Icos-1vx—fe2c4—1696           | -3196.011406 | 58.1 |
| 1812 | 11v-03-OhfusettoPentBipyr—fe2c4—697  | -3196.011392 | 58.1 |
| 1813 | 11v-02-TricapCube—fe2c4—442          | -3196.011319 | 58.1 |
| 1814 | 11v-02-TricapCube—fe2c4—428          | -3196.011316 | 58.1 |
| 1815 | 11v-02-TricapCube—fe2c4—385          | -3196.011264 | 58.2 |
| 1816 | 11v-02-TricapCubeA—fe2c4—197         | -3196.011221 | 58.2 |
| 1817 | 11v-03-OhfusettoPentBipyr—fe2c4—863  | -3196.011084 | 58.3 |
| 1818 | 11v-04-Icos-1vx—fe2c4—1500           | -3196.01101  | 58.3 |
| 1819 | 11v-03-OhfusettoPentBipyr—fe2c4—1077 | -3196.010952 | 58.4 |
| 1820 | 11v-03-OhfusettoPentBipyr—fe2c4—1083 | -3196.010952 | 58.4 |
| 1821 | 11v-03-OhfusettoPentBipyr—fe2c4—1117 | -3196.010952 | 58.4 |
| 1822 | 11v-03-OhfusettoPentBipyr—fe2c4—1124 | -3196.010952 | 58.4 |
| 1823 | 11v-03-OhfusettoPentBipyr—fe2c4—1126 | -3196.010782 | 58.5 |
| 1824 | 11v-04-Icos-1vx—fe2c4—2932           | -3196.01077  | 58.5 |
| 1825 | 11v-04-Icos-1vx—fe2c4—2962           | -3196.010768 | 58.5 |
| 1826 | 11v-04-Icos-1vx—fe2c4—3082           | -3196.010766 | 58.5 |
| 1827 | 11v-03-OhfusettoPentBipyr—fe2c4—765  | -3196.010593 | 58.6 |
| 1828 | 11v-03-OhfusettoPentBipyr—fe2c4—1041 | -3196.010379 | 58.7 |
| 1829 | 11v-03-OhfusettoPentBipyr—fe2c4—966  | -3196.010366 | 58.7 |
| 1830 | 11v-03-OhfusettoPentBipyr—fe2c4—980  | -3196.01036  | 58.7 |
| 1831 | 11v-01-PentaCapTrPr—fe2c4—1          | -3196.010339 | 58.7 |
| 1832 | 11v-01-PentaCapTrPr—fe2c4—69         | -3196.010339 | 58.7 |
| 1833 | 11v-04-Icos-1vx—fe2c4—2544           | -3196.010322 | 58.8 |



|      |                                      |              |      |
|------|--------------------------------------|--------------|------|
| 1834 | 11v-04-Icos-1vx—fe2c4—2550           | -3196.010316 | 58.8 |
| 1835 | 11v-04-Icos-1vx—fe2c4—2574           | -3196.010307 | 58.8 |
| 1836 | 11v-04-Icos-1vx—fe2c4—2758           | -3196.010306 | 58.8 |
| 1837 | 11v-03-OhfusettoPentBipyr—fe2c4—767  | -3196.010242 | 58.8 |
| 1838 | 11v-03-OhfusettoPentBipyr—fe2c4—737  | -3196.010239 | 58.8 |
| 1839 | 11v-01-PentaCapTrPr—fe2c4—68         | -3196.010094 | 58.9 |
| 1840 | 11v-04-Icos-1vx—fe2c4—2818           | -3196.00953  | 59.2 |
| 1841 | 11v-04-Icos-1vx—fe2c4—2261           | -3196.009477 | 59.3 |
| 1842 | 11v-03-OhfusettoPentBipyr—fe2c4—892  | -3196.009434 | 59.3 |
| 1843 | 11v-04-Icos-1vx—fe2c4—1701           | -3196.009427 | 59.3 |
| 1844 | 11v-04-Icos-1vx—fe2c4—2638           | -3196.009364 | 59.4 |
| 1845 | 11v-04-Icos-1vx—fe2c4—2656           | -3196.009351 | 59.4 |
| 1846 | 11v-02-TricapCube—fe2c4—244          | -3196.009267 | 59.4 |
| 1847 | 11v-03-OhfusettoPentBipyr—fe2c4—1191 | -3196.009234 | 59.4 |
| 1848 | 11v-03-OhfusettoPentBipyr—fe2c4—759  | -3196.009174 | 59.5 |
| 1849 | 11v-04-Icos-1vx—fe2c4—1820           | -3196.009075 | 59.5 |
| 1850 | 11v-04-Icos-1vx—fe2c4—1911           | -3196.008886 | 59.7 |
| 1851 | 11v-04-Icos-1vx—fe2c4—2288           | -3196.008685 | 59.8 |
| 1852 | 11v-04-Icos-1vx—fe2c4—3137           | -3196.008675 | 59.8 |
| 1853 | 11v-04-Icos-1vx—fe2c4—1961           | -3196.008637 | 59.8 |
| 1854 | 11v-01-PentaCapTrPr—fe2c4—34         | -3196.008606 | 59.8 |
| 1855 | 11v-01-PentaCapTrPr—fe2c4—38         | -3196.008562 | 59.9 |
| 1856 | 11v-04-Icos-1vx—fe2c4—2747           | -3196.008505 | 59.9 |
| 1857 | 11v-03-OhfusettoPentBipyr—fe2c4—977  | -3196.008317 | 60.0 |
| 1858 | 11v-03-OhfusettoPentBipyr—fe2c4—989  | -3196.008314 | 60.0 |
| 1859 | 11v-04-Icos-1vx—fe2c4—3189           | -3196.008248 | 60.1 |
| 1860 | 11v-04-Icos-1vx—fe2c4—3182           | -3196.008243 | 60.1 |
| 1861 | 11v-04-Icos-1vx—fe2c4—3207           | -3196.00824  | 60.1 |
| 1862 | 11v-03-OhfusettoPentBipyr—fe2c4—1159 | -3196.008236 | 60.1 |
| 1863 | 11v-03-OhfusettoPentBipyr—fe2c4—1330 | -3196.008182 | 60.1 |
| 1864 | 11v-03-OhfusettoPentBipyr—fe2c4—1185 | -3196.008153 | 60.1 |
| 1865 | 11v-03-OhfusettoPentBipyr—fe2c4—1195 | -3196.008151 | 60.1 |
| 1866 | 11v-04-Icos-1vx—fe2c4—1916           | -3196.008129 | 60.1 |
| 1867 | 11v-04-Icos-1vx—fe2c4—1921           | -3196.008128 | 60.1 |
| 1868 | 11v-03-OhfusettoPentBipyr—fe2c4—1221 | -3196.008122 | 60.1 |
| 1869 | 11v-04-Icos-1vx—fe2c4—1741           | -3196.007824 | 60.3 |
| 1870 | 11v-04-Icos-1vx—fe2c4—1415           | -3196.007694 | 60.4 |
| 1871 | 11v-03-OhfusettoPentBipyr—fe2c4—894  | -3196.007637 | 60.4 |
| 1872 | 11v-03-OhfusettoPentBipyr—fe2c4—918  | -3196.007637 | 60.4 |
| 1873 | 11v-03-OhfusettoPentBipyr—fe2c4—846  | -3196.007635 | 60.4 |
| 1874 | 11v-04-Icos-1vx—fe2c4—3250           | -3196.007624 | 60.4 |
| 1875 | 11v-04-Icos-1vx—fe2c4—2272           | -3196.007607 | 60.5 |
| 1876 | 11v-04-Icos-1vx—fe2c4—1713           | -3196.00752  | 60.5 |
| 1877 | 11v-04-Icos-1vx—fe2c4—1677           | -3196.007492 | 60.5 |
| 1878 | 11v-03-OhfusettoPentBipyr—fe2c4—671  | -3196.007442 | 60.6 |
| 1879 | 11v-03-OhfusettoPentBipyr—fe2c4—713  | -3196.007442 | 60.6 |
| 1880 | 11v-04-Icos-1vx—fe2c4—1697           | -3196.007368 | 60.6 |
| 1881 | 11v-03-OhfusettoPentBipyr—fe2c4—1235 | -3196.007332 | 60.6 |
| 1882 | 11v-03-OhfusettoPentBipyr—fe2c4—1241 | -3196.007331 | 60.6 |
| 1883 | 11v-04-Icos-1vx—fe2c4—2283           | -3196.00727  | 60.7 |
| 1884 | 11v-04-Icos-1vx—fe2c4—2793           | -3196.007175 | 60.7 |

|      |                                        |                     |      |
|------|----------------------------------------|---------------------|------|
| 1885 | 11v-04-Icos-1vx— fe2c4— 2820           | -3196.007138        | 60.7 |
| 1886 | 11v-03-OhfusettoPentBipyr— fe2c4— 546  | -3196.007127        | 60.8 |
| 1887 | 11v-04-Icos-1vx— fe2c4— 2352           | -3196.007127        | 60.8 |
| 1888 | 11v-04-Icos-1vx— fe2c4— 2969           | -3196.007011        | 60.8 |
| 1889 | 11v-04-Icos-1vx— fe2c4— 2954           | -3196.007002        | 60.8 |
| 1890 | 11v-04-Icos-1vx— fe2c4— 2936           | -3196.007           | 60.8 |
| 1891 | 11v-04-Icos-1vx— fe2c4— 2923           | -3196.006981        | 60.8 |
| 1892 | 11v-03-OhfusettoPentBipyr— fe2c4— 1066 | -3196.006972        | 60.9 |
| 1893 | 11v-04-Icos-1vx— fe2c4— 2814           | -3196.006938        | 60.9 |
| 1894 | 11v-04-Icos-1vx— fe2c4— 2393           | -3196.006927        | 60.9 |
| 1895 | 11v-03-OhfusettoPentBipyr— fe2c4— 1058 | -3196.00692         | 60.9 |
| 1896 | 11v-03-OhfusettoPentBipyr— fe2c4— 1079 | -3196.006918        | 60.9 |
| 1897 | 11v-03-OhfusettoPentBipyr— fe2c4— 1108 | -3196.006918        | 60.9 |
| 1898 | 11v-04-Icos-1vx— fe2c4— 2380           | -3196.006912        | 60.9 |
| 1899 | 11v-03-OhfusettoPentBipyr— fe2c4— 682  | -3196.006902        | 60.9 |
| 1900 | 11v-03-OhfusettoPentBipyr— fe2c4— 667  | -3196.006881        | 60.9 |
| 1901 | 11v-03-OhfusettoPentBipyr— fe2c4— 676  | -3196.006855        | 60.9 |
| 1902 | 11v-02-TricapCube— fe2c4— 250          | -3196.006805        | 61.0 |
| 1903 | 11v-02-TricapCube— fe2c4— 255          | -3196.006805        | 61.0 |
| 1904 | 11v-04-Icos-1vx— fe2c4— 2341           | -3196.006759        | 61.0 |
| 1905 | 11v-02-TricapCube— fe2c4— 288          | -3196.006746        | 61.0 |
| 1906 | 11v-02-TricapCube— fe2c4— 294          | -3196.006745        | 61.0 |
| 1907 | 11v-02-TricapCube— fe2c4— 306          | -3196.006739        | 61.0 |
| 1908 | 11v-03-OhfusettoPentBipyr— fe2c4— 777  | -3196.006686        | 61.0 |
| 1909 | 11v-03-OhfusettoPentBipyr— fe2c4— 750  | -3196.006683        | 61.0 |
| 1910 | 11v-04-Icos-1vx— fe2c4— 1442           | -3196.006605        | 61.1 |
| 1911 | 11v-04-Icos-1vx— fe2c4— 1512           | -3196.006605        | 61.1 |
| 1912 | 11v-04-Icos-1vx— fe2c4— 1532           | -3196.006605        | 61.1 |
| 1913 | 11v-04-Icos-1vx— fe2c4— 1551           | -3196.006605        | 61.1 |
| 1914 | 11v-03-OhfusettoPentBipyr— fe2c4— 1091 | -3196.006586        | 61.1 |
| 1915 | 11v-04-Icos-1vx— fe2c4— 2279           | -3196.006571        | 61.1 |
| 1916 | 11v-03-OhfusettoPentBipyr— fe2c4— 1078 | -3196.006562        | 61.1 |
| 1917 | 11v-03-OhfusettoPentBipyr— fe2c4— 1064 | -3196.006559        | 61.1 |
| 1918 | 11v-03-OhfusettoPentBipyr— fe2c4— 1057 | -3196.006556        | 61.1 |
| 1919 | 11v-03-OhfusettoPentBipyr— fe2c4— 1084 | -3196.006554        | 61.1 |
| 1920 | 11v-03-OhfusettoPentBipyr— fe2c4— 1192 | -3196.00651         | 61.1 |
| 1921 | 11v-01-PentaCapTrPr— fe2c4— 175        | -3196.00647         | 61.2 |
| 1922 | 11v-04-Icos-1vx— fe2c4— 1664           | -3196.006442        | 61.2 |
| 1923 | 11v-04-Icos-1vx— fe2c4— 1674           | -3196.006442        | 61.2 |
| 1924 | 11v-04-Icos-1vx— fe2c4— 1682           | -3196.006442        | 61.2 |
| 1925 | 11v-03-OhfusettoPentBipyr— fe2c4— 986  | -3196.0063490000002 | 61.2 |
| 1926 | 11v-04-Icos-1vx— fe2c4— 1787           | -3196.006307        | 61.3 |
| 1927 | 11v-04-Icos-1vx— fe2c4— 1793           | -3196.006307        | 61.3 |
| 1928 | 11v-04-Icos-1vx— fe2c4— 1805           | -3196.006307        | 61.3 |
| 1929 | 11v-03-OhfusettoPentBipyr— fe2c4— 510  | -3196.006278        | 61.3 |
| 1930 | 11v-04-Icos-1vx— fe2c4— 3047           | -3196.0061          | 61.4 |
| 1931 | 11v-04-Icos-1vx— fe2c4— 3067           | -3196.006055        | 61.4 |
| 1932 | 11v-04-Icos-1vx— fe2c4— 3006           | -3196.006052        | 61.4 |
| 1933 | 11v-04-Icos-1vx— fe2c4— 3245           | -3196.00602         | 61.5 |
| 1934 | 11v-01-PentaCapTrPr— fe2c4— 35         | -3196.005901        | 61.5 |
| 1935 | 11v-03-OhfusettoPentBipyr— fe2c4— 1008 | -3196.005866        | 61.5 |

|      |                                     |              |      |
|------|-------------------------------------|--------------|------|
| 1936 | 11v-03-OhfusetopentBipyr—fe2c4—936  | -3196.005865 | 61.5 |
| 1937 | 11v-03-OhfusetopentBipyr—fe2c4—993  | -3196.005862 | 61.5 |
| 1938 | 11v-03-OhfusetopentBipyr—fe2c4—948  | -3196.005861 | 61.6 |
| 1939 | 11v-03-OhfusetopentBipyr—fe2c4—981  | -3196.00586  | 61.6 |
| 1940 | 11v-03-OhfusetopentBipyr—fe2c4—927  | -3196.005857 | 61.6 |
| 1941 | 11v-04-Icos-1vx—fe2c4—2065          | -3196.005849 | 61.6 |
| 1942 | 11v-04-Icos-1vx—fe2c4—2963          | -3196.005806 | 61.6 |
| 1943 | 11v-04-Icos-1vx—fe2c4—2986          | -3196.005802 | 61.6 |
| 1944 | 11v-04-Icos-1vx—fe2c4—3005          | -3196.005721 | 61.6 |
| 1945 | 11v-04-Icos-1vx—fe2c4—3041          | -3196.00572  | 61.6 |
| 1946 | 11v-03-OhfusetopentBipyr—fe2c4—568  | -3196.005624 | 61.7 |
| 1947 | 11v-04-Icos-1vx—fe2c4—3027          | -3196.005547 | 61.7 |
| 1948 | 11v-04-Icos-1vx—fe2c4—3012          | -3196.005533 | 61.8 |
| 1949 | 11v-04-Icos-1vx—fe2c4—3063          | -3196.005528 | 61.8 |
| 1950 | 11v-02-TricapCubeA—fe2c4—200        | -3196.005333 | 61.9 |
| 1951 | 11v-04-Icos-1vx—fe2c4—1445          | -3196.005319 | 61.9 |
| 1952 | 11v-02-TricapCube—fe2c4—318         | -3196.005223 | 62.0 |
| 1953 | 11v-04-Icos-1vx—fe2c4—1431          | -3196.005104 | 62.0 |
| 1954 | 11v-04-Icos-1vx—fe2c4—1438          | -3196.005104 | 62.0 |
| 1955 | 11v-04-Icos-1vx—fe2c4—1470          | -3196.005104 | 62.0 |
| 1956 | 11v-04-Icos-1vx—fe2c4—1477          | -3196.005104 | 62.0 |
| 1957 | 11v-04-Icos-1vx—fe2c4—1569          | -3196.005104 | 62.0 |
| 1958 | 11v-04-Icos-1vx—fe2c4—1412          | -3196.005012 | 62.1 |
| 1959 | 11v-04-Icos-1vx—fe2c4—2387          | -3196.00447  | 62.4 |
| 1960 | 11v-04-Icos-1vx—fe2c4—3011          | -3196.004438 | 62.4 |
| 1961 | 11v-04-Icos-1vx—fe2c4—2981          | -3196.00443  | 62.4 |
| 1962 | 11v-04-Icos-1vx—fe2c4—3077          | -3196.004421 | 62.5 |
| 1963 | 11v-04-Icos-1vx—fe2c4—1417          | -3196.004383 | 62.5 |
| 1964 | 11v-04-Icos-1vx—fe2c4—1411          | -3196.004374 | 62.5 |
| 1965 | 11v-04-Icos-1vx—fe2c4—1509          | -3196.004229 | 62.6 |
| 1966 | 11v-04-Icos-1vx—fe2c4—3159          | -3196.004136 | 62.6 |
| 1967 | 11v-03-OhfusetopentBipyr—fe2c4—494  | -3196.003933 | 62.8 |
| 1968 | 11v-04-Icos-1vx—fe2c4—2018          | -3196.003856 | 62.8 |
| 1969 | 11v-04-Icos-1vx—fe2c4—2072          | -3196.003847 | 62.8 |
| 1970 | 11v-04-Icos-1vx—fe2c4—1970          | -3196.003845 | 62.8 |
| 1971 | 11v-04-Icos-1vx—fe2c4—1992          | -3196.003837 | 62.8 |
| 1972 | 11v-03-OhfusetopentBipyr—fe2c4—549  | -3196.00383  | 62.8 |
| 1973 | 11v-04-Icos-1vx—fe2c4—2285          | -3196.003755 | 62.9 |
| 1974 | 11v-04-Icos-1vx—fe2c4—1971          | -3196.003707 | 62.9 |
| 1975 | 11v-04-Icos-1vx—fe2c4—2064          | -3196.003707 | 62.9 |
| 1976 | 11v-04-Icos-1vx—fe2c4—2223          | -3196.003612 | 63.0 |
| 1977 | 11v-02-TricapCubeA—fe2c4—195        | -3196.003462 | 63.1 |
| 1978 | 11v-03-OhfusetopentBipyr—fe2c4—1342 | -3196.003438 | 63.1 |
| 1979 | 11v-04-Icos-1vx—fe2c4—2205          | -3196.00333  | 63.1 |
| 1980 | 11v-04-Icos-1vx—fe2c4—1983          | -3196.003296 | 63.2 |
| 1981 | 11v-04-Icos-1vx—fe2c4—2307          | -3196.003236 | 63.2 |
| 1982 | 11v-03-OhfusetopentBipyr—fe2c4—983  | -3196.003155 | 63.2 |
| 1983 | 11v-03-OhfusetopentBipyr—fe2c4—1199 | -3196.002819 | 63.5 |
| 1984 | 11v-04-Icos-1vx—fe2c4—1991          | -3196.002808 | 63.5 |
| 1985 | 11v-04-Icos-1vx—fe2c4—2284          | -3196.002763 | 63.5 |
| 1986 | 11v-03-OhfusetopentBipyr—fe2c4—623  | -3196.00263  | 63.6 |

|      |                                        |              |      |
|------|----------------------------------------|--------------|------|
| 1987 | 11v-04-Icos-1vx— fe2c4— 2609           | -3196.002606 | 63.6 |
| 1988 | 11v-04-Icos-1vx— fe2c4— 1949           | -3196.00251  | 63.7 |
| 1989 | 11v-04-Icos-1vx— fe2c4— 1895           | -3196.002489 | 63.7 |
| 1990 | 11v-04-Icos-1vx— fe2c4— 1964           | -3196.002489 | 63.7 |
| 1991 | 11v-04-Icos-1vx— fe2c4— 1886           | -3196.002485 | 63.7 |
| 1992 | 11v-04-Icos-1vx— fe2c4— 1931           | -3196.002472 | 63.7 |
| 1993 | 11v-04-Icos-1vx— fe2c4— 1994           | -3196.002414 | 63.7 |
| 1994 | 11v-04-Icos-1vx— fe2c4— 2006           | -3196.002414 | 63.7 |
| 1995 | 11v-04-Icos-1vx— fe2c4— 2066           | -3196.002401 | 63.7 |
| 1996 | 11v-04-Icos-1vx— fe2c4— 2075           | -3196.002356 | 63.7 |
| 1997 | 11v-04-Icos-1vx— fe2c4— 2021           | -3196.002355 | 63.8 |
| 1998 | 11v-04-Icos-1vx— fe2c4— 2093           | -3196.002355 | 63.8 |
| 1999 | 11v-04-Icos-1vx— fe2c4— 2099           | -3196.002313 | 63.8 |
| 2000 | 11v-04-Icos-1vx— fe2c4— 2015           | -3196.002305 | 63.8 |
| 2001 | 11v-04-Icos-1vx— fe2c4— 2785           | -3196.002296 | 63.8 |
| 2002 | 11v-03-OhfusettoPentBipyr— fe2c4— 1198 | -3196.002239 | 63.8 |
| 2003 | 11v-03-OhfusettoPentBipyr— fe2c4— 567  | -3196.002205 | 63.8 |
| 2004 | 11v-01-PentaCapTrPr— fe2c4— 5          | -3196.002096 | 63.9 |
| 2005 | 11v-04-Icos-1vx— fe2c4— 2073           | -3196.002081 | 63.9 |
| 2006 | 11v-04-Icos-1vx— fe2c4— 2090           | -3196.00207  | 63.9 |
| 2007 | 11v-01-PentaCapTrPr— fe2c4— 78         | -3196.002033 | 64.0 |
| 2008 | 11v-04-Icos-1vx— fe2c4— 2926           | -3196.001911 | 64.0 |
| 2009 | 11v-04-Icos-1vx— fe2c4— 2920           | -3196.001908 | 64.0 |
| 2010 | 11v-04-Icos-1vx— fe2c4— 1439           | -3196.001902 | 64.0 |
| 2011 | 11v-01-PentaCapTrPr— fe2c4— 12         | -3196.001821 | 64.1 |
| 2012 | 11v-04-Icos-1vx— fe2c4— 1458           | -3196.001811 | 64.1 |
| 2013 | 11v-04-Icos-1vx— fe2c4— 1550           | -3196.001807 | 64.1 |
| 2014 | 11v-04-Icos-1vx— fe2c4— 1478           | -3196.001793 | 64.1 |
| 2015 | 11v-04-Icos-1vx— fe2c4— 1466           | -3196.001779 | 64.1 |
| 2016 | 11v-04-Icos-1vx— fe2c4— 1538           | -3196.001779 | 64.1 |
| 2017 | 11v-04-Icos-1vx— fe2c4— 1565           | -3196.001779 | 64.1 |
| 2018 | 11v-04-Icos-1vx— fe2c4— 2301           | -3196.001628 | 64.2 |
| 2019 | 11v-02-TricapCube— fe2c4— 256          | -3196.00159  | 64.2 |
| 2020 | 11v-02-TricapCube— fe2c4— 262          | -3196.001588 | 64.2 |
| 2021 | 11v-02-TricapCube— fe2c4— 238          | -3196.001586 | 64.2 |
| 2022 | 11v-04-Icos-1vx— fe2c4— 2798           | -3196.001503 | 64.3 |
| 2023 | 11v-04-Icos-1vx— fe2c4— 2816           | -3196.001499 | 64.3 |
| 2024 | 11v-04-Icos-1vx— fe2c4— 2822           | -3196.001491 | 64.3 |
| 2025 | 11v-01-PentaCapTrPr— fe2c4— 162        | -3196.001473 | 64.3 |
| 2026 | 11v-01-PentaCapTrPr— fe2c4— 112        | -3196.001423 | 64.3 |
| 2027 | 11v-03-OhfusettoPentBipyr— fe2c4— 579  | -3196.001353 | 64.4 |
| 2028 | 11v-03-OhfusettoPentBipyr— fe2c4— 591  | -3196.001353 | 64.4 |
| 2029 | 11v-03-OhfusettoPentBipyr— fe2c4— 595  | -3196.001353 | 64.4 |
| 2030 | 11v-04-Icos-1vx— fe2c4— 3078           | -3196.001349 | 64.4 |
| 2031 | 11v-04-Icos-1vx— fe2c4— 2280           | -3196.001335 | 64.4 |
| 2032 | 11v-03-OhfusettoPentBipyr— fe2c4— 496  | -3196.001301 | 64.4 |
| 2033 | 11v-04-Icos-1vx— fe2c4— 2298           | -3196.001258 | 64.4 |
| 2034 | 11v-04-Icos-1vx— fe2c4— 2304           | -3196.001238 | 64.5 |
| 2035 | 11v-04-Icos-1vx— fe2c4— 3071           | -3196.001218 | 64.5 |
| 2036 | 11v-03-OhfusettoPentBipyr— fe2c4— 700  | -3196.00121  | 64.5 |
| 2037 | 11v-04-Icos-1vx— fe2c4— 2059           | -3196.001127 | 64.5 |

|      |                                        |              |      |
|------|----------------------------------------|--------------|------|
| 2038 | 11v-04-Icos-1vx— fe2c4— 2036           | -3196.001125 | 64.5 |
| 2039 | 11v-04-Icos-1vx— fe2c4— 1988           | -3196.000974 | 64.6 |
| 2040 | 11v-04-Icos-1vx— fe2c4— 2084           | -3196.000965 | 64.6 |
| 2041 | 11v-04-Icos-1vx— fe2c4— 2070           | -3196.00096  | 64.6 |
| 2042 | 11v-03-OhfusettoPentBipyr— fe2c4— 683  | -3196.000959 | 64.6 |
| 2043 | 11v-04-Icos-1vx— fe2c4— 2058           | -3196.000905 | 64.7 |
| 2044 | 11v-04-Icos-1vx— fe2c4— 1968           | -3196.000898 | 64.7 |
| 2045 | 11v-04-Icos-1vx— fe2c4— 1976           | -3196.000892 | 64.7 |
| 2046 | 11v-04-Icos-1vx— fe2c4— 2880           | -3196.000871 | 64.7 |
| 2047 | 11v-03-OhfusettoPentBipyr— fe2c4— 468  | -3196.000834 | 64.7 |
| 2048 | 11v-04-Icos-1vx— fe2c4— 1430           | -3196.000795 | 64.7 |
| 2049 | 11v-04-Icos-1vx— fe2c4— 1542           | -3196.000795 | 64.7 |
| 2050 | 11v-04-Icos-1vx— fe2c4— 1549           | -3196.000795 | 64.7 |
| 2051 | 11v-04-Icos-1vx— fe2c4— 1568           | -3196.000795 | 64.7 |
| 2052 | 11v-04-Icos-1vx— fe2c4— 2915           | -3196.000631 | 64.8 |
| 2053 | 11v-04-Icos-1vx— fe2c4— 2982           | -3196.00063  | 64.8 |
| 2054 | 11v-04-Icos-1vx— fe2c4— 2996           | -3196.000628 | 64.8 |
| 2055 | 11v-04-Icos-1vx— fe2c4— 3062           | -3196.000627 | 64.8 |
| 2056 | 11v-04-Icos-1vx— fe2c4— 2854           | -3196.000519 | 64.9 |
| 2057 | 11v-04-Icos-1vx— fe2c4— 2530           | -3196.000516 | 64.9 |
| 2058 | 11v-04-Icos-1vx— fe2c4— 2031           | -3196.000168 | 65.1 |
| 2059 | 11v-04-Icos-1vx— fe2c4— 1665           | -3195.999955 | 65.3 |
| 2060 | 11v-04-Icos-1vx— fe2c4— 1668           | -3195.999955 | 65.3 |
| 2061 | 11v-04-Icos-1vx— fe2c4— 1683           | -3195.999955 | 65.3 |
| 2062 | 11v-03-OhfusettoPentBipyr— fe2c4— 1065 | -3195.999954 | 65.3 |
| 2063 | 11v-04-Icos-1vx— fe2c4— 2800           | -3195.999718 | 65.4 |
| 2064 | 11v-04-Icos-1vx— fe2c4— 2555           | -3195.999575 | 65.5 |
| 2065 | 11v-03-OhfusettoPentBipyr— fe2c4— 1085 | -3195.999528 | 65.5 |
| 2066 | 11v-04-Icos-1vx— fe2c4— 3205           | -3195.999492 | 65.5 |
| 2067 | 11v-04-Icos-1vx— fe2c4— 3201           | -3195.999487 | 65.6 |
| 2068 | 11v-04-Icos-1vx— fe2c4— 3218           | -3195.999483 | 65.6 |
| 2069 | 11v-04-Icos-1vx— fe2c4— 3228           | -3195.999405 | 65.6 |
| 2070 | 11v-04-Icos-1vx— fe2c4— 3234           | -3195.999399 | 65.6 |
| 2071 | 11v-04-Icos-1vx— fe2c4— 3270           | -3195.999385 | 65.6 |
| 2072 | 11v-03-OhfusettoPentBipyr— fe2c4— 1144 | -3195.999232 | 65.7 |
| 2073 | 11v-04-Icos-1vx— fe2c4— 2565           | -3195.999214 | 65.7 |
| 2074 | 11v-04-Icos-1vx— fe2c4— 2583           | -3195.999213 | 65.7 |
| 2075 | 11v-04-Icos-1vx— fe2c4— 3160           | -3195.998998 | 65.9 |
| 2076 | 11v-04-Icos-1vx— fe2c4— 2698           | -3195.998949 | 65.9 |
| 2077 | 11v-04-Icos-1vx— fe2c4— 2686           | -3195.998942 | 65.9 |
| 2078 | 11v-04-Icos-1vx— fe2c4— 2716           | -3195.998937 | 65.9 |
| 2079 | 11v-03-OhfusettoPentBipyr— fe2c4— 1227 | -3195.998929 | 65.9 |
| 2080 | 11v-04-Icos-1vx— fe2c4— 3199           | -3195.998918 | 65.9 |
| 2081 | 11v-03-OhfusettoPentBipyr— fe2c4— 718  | -3195.998911 | 65.9 |
| 2082 | 11v-04-Icos-1vx— fe2c4— 3187           | -3195.998908 | 65.9 |
| 2083 | 11v-03-OhfusettoPentBipyr— fe2c4— 749  | -3195.998892 | 65.9 |
| 2084 | 11v-04-Icos-1vx— fe2c4— 3176           | -3195.998892 | 65.9 |
| 2085 | 11v-04-Icos-1vx— fe2c4— 2094           | -3195.998886 | 65.9 |
| 2086 | 11v-04-Icos-1vx— fe2c4— 2722           | -3195.998863 | 65.9 |
| 2087 | 11v-03-OhfusettoPentBipyr— fe2c4— 514  | -3195.998799 | 66.0 |
| 2088 | 11v-03-OhfusettoPentBipyr— fe2c4— 445  | -3195.998776 | 66.0 |

|      |                                      |              |      |
|------|--------------------------------------|--------------|------|
| 2089 | 11v-03-OhfusettoPentBipyr—fe2c4—472  | -3195.998772 | 66.0 |
| 2090 | 11v-04-Icos-1vx—fe2c4—3178           | -3195.998735 | 66.0 |
| 2091 | 11v-04-Icos-1vx—fe2c4—3166           | -3195.998727 | 66.0 |
| 2092 | 11v-03-OhfusettoPentBipyr—fe2c4—1092 | -3195.998717 | 66.0 |
| 2093 | 11v-03-OhfusettoPentBipyr—fe2c4—1093 | -3195.998717 | 66.0 |
| 2094 | 11v-03-OhfusettoPentBipyr—fe2c4—1125 | -3195.998711 | 66.0 |
| 2095 | 11v-03-OhfusettoPentBipyr—fe2c4—454  | -3195.998711 | 66.0 |
| 2096 | 11v-04-Icos-1vx—fe2c4—2017           | -3195.998679 | 66.1 |
| 2097 | 11v-04-Icos-1vx—fe2c4—1810           | -3195.998673 | 66.1 |
| 2098 | 11v-01-PentaCapTrPr—fe2c4—67         | -3195.998445 | 66.2 |
| 2099 | 11v-04-Icos-1vx—fe2c4—2025           | -3195.998339 | 66.3 |
| 2100 | 11v-01-PentaCapTrPr—fe2c4—99         | -3195.998291 | 66.3 |
| 2101 | 11v-04-Icos-1vx—fe2c4—1981           | -3195.998144 | 66.4 |
| 2102 | 11v-03-OhfusettoPentBipyr—fe2c4—1239 | -3195.998038 | 66.5 |
| 2103 | 11v-03-OhfusettoPentBipyr—fe2c4—1196 | -3195.99803  | 66.5 |
| 2104 | 11v-04-Icos-1vx—fe2c4—2277           | -3195.997845 | 66.6 |
| 2105 | 11v-04-Icos-1vx—fe2c4—2319           | -3195.997786 | 66.6 |
| 2106 | 11v-04-Icos-1vx—fe2c4—2346           | -3195.997775 | 66.6 |
| 2107 | 11v-04-Icos-1vx—fe2c4—3136           | -3195.997669 | 66.7 |
| 2108 | 11v-04-Icos-1vx—fe2c4—3130           | -3195.99766  | 66.7 |
| 2109 | 11v-04-Icos-1vx—fe2c4—2322           | -3195.997578 | 66.7 |
| 2110 | 11v-04-Icos-1vx—fe2c4—2312           | -3195.997549 | 66.8 |
| 2111 | 11v-03-OhfusettoPentBipyr—fe2c4—582  | -3195.997313 | 66.9 |
| 2112 | 11v-03-OhfusettoPentBipyr—fe2c4—585  | -3195.997313 | 66.9 |
| 2113 | 11v-03-OhfusettoPentBipyr—fe2c4—597  | -3195.997313 | 66.9 |
| 2114 | 11v-03-OhfusettoPentBipyr—fe2c4—601  | -3195.997313 | 66.9 |
| 2115 | 11v-04-Icos-1vx—fe2c4—2470           | -3195.997147 | 67.0 |
| 2116 | 11v-04-Icos-1vx—fe2c4—2077           | -3195.996975 | 67.1 |
| 2117 | 11v-03-OhfusettoPentBipyr—fe2c4—731  | -3195.996973 | 67.1 |
| 2118 | 11v-04-Icos-1vx—fe2c4—3072           | -3195.996964 | 67.1 |
| 2119 | 11v-04-Icos-1vx—fe2c4—3069           | -3195.996936 | 67.2 |
| 2120 | 11v-04-Icos-1vx—fe2c4—1990           | -3195.996931 | 67.2 |
| 2121 | 11v-04-Icos-1vx—fe2c4—2925           | -3195.996922 | 67.2 |
| 2122 | 11v-01-PentaCapTrPr—fe2c4—97         | -3195.996721 | 67.3 |
| 2123 | 11v-04-Icos-1vx—fe2c4—3081           | -3195.996486 | 67.4 |
| 2124 | 11v-04-Icos-1vx—fe2c4—3085           | -3195.996477 | 67.4 |
| 2125 | 11v-04-Icos-1vx—fe2c4—2703           | -3195.99634  | 67.5 |
| 2126 | 11v-04-Icos-1vx—fe2c4—2739           | -3195.996337 | 67.5 |
| 2127 | 11v-04-Icos-1vx—fe2c4—2694           | -3195.996333 | 67.5 |
| 2128 | 11v-04-Icos-1vx—fe2c4—2649           | -3195.996331 | 67.5 |
| 2129 | 11v-04-Icos-1vx—fe2c4—2631           | -3195.996321 | 67.5 |
| 2130 | 11v-04-Icos-1vx—fe2c4—3220           | -3195.996256 | 67.6 |
| 2131 | 11v-04-Icos-1vx—fe2c4—3226           | -3195.996253 | 67.6 |
| 2132 | 11v-04-Icos-1vx—fe2c4—3148           | -3195.996246 | 67.6 |
| 2133 | 11v-04-Icos-1vx—fe2c4—2238           | -3195.996122 | 67.7 |
| 2134 | 11v-04-Icos-1vx—fe2c4—2488           | -3195.996039 | 67.7 |
| 2135 | 11v-04-Icos-1vx—fe2c4—3154           | -3195.996014 | 67.7 |
| 2136 | 11v-03-OhfusettoPentBipyr—fe2c4—1341 | -3195.995947 | 67.8 |
| 2137 | 11v-01-PentaCapTrPr—fe2c4—16         | -3195.995776 | 67.9 |
| 2138 | 11v-04-Icos-1vx—fe2c4—1951           | -3195.995601 | 68.0 |
| 2139 | 11v-04-Icos-1vx—fe2c4—1952           | -3195.995299 | 68.2 |

|      |                                       |              |      |
|------|---------------------------------------|--------------|------|
| 2140 | 11v-04-Icos-1vx— fe2c4— 1937          | -3195.995296 | 68.2 |
| 2141 | 11v-02-TricapCube— fe2c4— 362         | -3195.995288 | 68.2 |
| 2142 | 11v-02-TricapCube— fe2c4— 382         | -3195.995288 | 68.2 |
| 2143 | 11v-02-TricapCube— fe2c4— 425         | -3195.995288 | 68.2 |
| 2144 | 11v-04-Icos-1vx— fe2c4— 2663          | -3195.995027 | 68.3 |
| 2145 | 11v-04-Icos-1vx— fe2c4— 2876          | -3195.994915 | 68.4 |
| 2146 | 11v-04-Icos-1vx— fe2c4— 2888          | -3195.994905 | 68.4 |
| 2147 | 11v-03-OhfusettoPentBipyr— fe2c4— 729 | -3195.994893 | 68.4 |
| 2148 | 11v-03-OhfusettoPentBipyr— fe2c4— 690 | -3195.994872 | 68.4 |
| 2149 | 11v-03-OhfusettoPentBipyr— fe2c4— 681 | -3195.994747 | 68.5 |
| 2150 | 11v-03-OhfusettoPentBipyr— fe2c4— 675 | -3195.994746 | 68.5 |
| 2151 | 11v-03-OhfusettoPentBipyr— fe2c4— 730 | -3195.994742 | 68.5 |
| 2152 | 11v-03-OhfusettoPentBipyr— fe2c4— 721 | -3195.994657 | 68.6 |
| 2153 | 11v-04-Icos-1vx— fe2c4— 1702          | -3195.994628 | 68.6 |
| 2154 | 11v-04-Icos-1vx— fe2c4— 1714          | -3195.994628 | 68.6 |
| 2155 | 11v-04-Icos-1vx— fe2c4— 2889          | -3195.994386 | 68.8 |
| 2156 | 11v-04-Icos-1vx— fe2c4— 2894          | -3195.994384 | 68.8 |
| 2157 | 11v-04-Icos-1vx— fe2c4— 3259          | -3195.994339 | 68.8 |
| 2158 | 11v-04-Icos-1vx— fe2c4— 2349          | -3195.994323 | 68.8 |
| 2159 | 11v-04-Icos-1vx— fe2c4— 2331          | -3195.994321 | 68.8 |
| 2160 | 11v-04-Icos-1vx— fe2c4— 2296          | -3195.994303 | 68.8 |
| 2161 | 11v-02-TricapCube— fe2c4— 251         | -3195.994248 | 68.8 |
| 2162 | 11v-02-TricapCube— fe2c4— 282         | -3195.994245 | 68.8 |
| 2163 | 11v-04-Icos-1vx— fe2c4— 2360          | -3195.99424  | 68.8 |
| 2164 | 11v-04-Icos-1vx— fe2c4— 1715          | -3195.994239 | 68.8 |
| 2165 | 11v-03-OhfusettoPentBipyr— fe2c4— 719 | -3195.994236 | 68.8 |
| 2166 | 11v-03-OhfusettoPentBipyr— fe2c4— 791 | -3195.994236 | 68.8 |
| 2167 | 11v-04-Icos-1vx— fe2c4— 2315          | -3195.994233 | 68.8 |
| 2168 | 11v-04-Icos-1vx— fe2c4— 3232          | -3195.994229 | 68.8 |
| 2169 | 11v-04-Icos-1vx— fe2c4— 1993          | -3195.994205 | 68.9 |
| 2170 | 11v-04-Icos-1vx— fe2c4— 2012          | -3195.994205 | 68.9 |
| 2171 | 11v-04-Icos-1vx— fe2c4— 3243          | -3195.994198 | 68.9 |
| 2172 | 11v-04-Icos-1vx— fe2c4— 2054          | -3195.994177 | 68.9 |
| 2173 | 11v-04-Icos-1vx— fe2c4— 2344          | -3195.994135 | 68.9 |
| 2174 | 11v-04-Icos-1vx— fe2c4— 2690          | -3195.994107 | 68.9 |
| 2175 | 11v-03-OhfusettoPentBipyr— fe2c4— 698 | -3195.993907 | 69.1 |
| 2176 | 11v-03-OhfusettoPentBipyr— fe2c4— 716 | -3195.993907 | 69.1 |
| 2177 | 11v-04-Icos-1vx— fe2c4— 2053          | -3195.993901 | 69.1 |
| 2178 | 11v-04-Icos-1vx— fe2c4— 2041          | -3195.993898 | 69.1 |
| 2179 | 11v-03-OhfusettoPentBipyr— fe2c4— 707 | -3195.993889 | 69.1 |
| 2180 | 11v-04-Icos-1vx— fe2c4— 1385          | -3195.99388  | 69.1 |
| 2181 | 11v-02-TricapCubeA— fe2c4— 207        | -3195.993788 | 69.1 |
| 2182 | 11v-04-Icos-1vx— fe2c4— 2517          | -3195.993773 | 69.1 |
| 2183 | 11v-04-Icos-1vx— fe2c4— 2868          | -3195.993746 | 69.2 |
| 2184 | 11v-04-Icos-1vx— fe2c4— 2334          | -3195.9937   | 69.2 |
| 2185 | 11v-04-Icos-1vx— fe2c4— 2276          | -3195.993658 | 69.2 |
| 2186 | 11v-04-Icos-1vx— fe2c4— 1359          | -3195.993649 | 69.2 |
| 2187 | 11v-04-Icos-1vx— fe2c4— 1374          | -3195.993649 | 69.2 |
| 2188 | 11v-04-Icos-1vx— fe2c4— 2318          | -3195.99361  | 69.2 |
| 2189 | 11v-03-OhfusettoPentBipyr— fe2c4— 712 | -3195.993487 | 69.3 |
| 2190 | 11v-03-OhfusettoPentBipyr— fe2c4— 670 | -3195.993484 | 69.3 |

|      |                                      |              |      |
|------|--------------------------------------|--------------|------|
| 2191 | 11v-04-Icos-1vx—fe2c4—1487           | -3195.993382 | 69.4 |
| 2192 | 11v-04-Icos-1vx—fe2c4—1493           | -3195.993382 | 69.4 |
| 2193 | 11v-04-Icos-1vx—fe2c4—1353           | -3195.993304 | 69.4 |
| 2194 | 11v-04-Icos-1vx—fe2c4—1358           | -3195.993304 | 69.4 |
| 2195 | 11v-04-Icos-1vx—fe2c4—3175           | -3195.993249 | 69.5 |
| 2196 | 11v-03-OhfusettoPentBipyr—fe2c4—920  | -3195.993107 | 69.6 |
| 2197 | 11v-04-Icos-1vx—fe2c4—2503           | -3195.993015 | 69.6 |
| 2198 | 11v-04-Icos-1vx—fe2c4—2515           | -3195.993009 | 69.6 |
| 2199 | 11v-04-Icos-1vx—fe2c4—2533           | -3195.992987 | 69.6 |
| 2200 | 11v-01-PentaCapTrPr—fe2c4—82         | -3195.992984 | 69.6 |
| 2201 | 11v-01-PentaCapTrPr—fe2c4—7          | -3195.992961 | 69.6 |
| 2202 | 11v-01-PentaCapTrPr—fe2c4—100        | -3195.99293  | 69.7 |
| 2203 | 11v-01-PentaCapTrPr—fe2c4—13         | -3195.99293  | 69.7 |
| 2204 | 11v-01-PentaCapTrPr—fe2c4—108        | -3195.99292  | 69.7 |
| 2205 | 11v-04-Icos-1vx—fe2c4—1420           | -3195.99266  | 69.8 |
| 2206 | 11v-03-OhfusettoPentBipyr—fe2c4—922  | -3195.992627 | 69.9 |
| 2207 | 11v-04-Icos-1vx—fe2c4—2675           | -3195.992441 | 70.0 |
| 2208 | 11v-04-Icos-1vx—fe2c4—2717           | -3195.992437 | 70.0 |
| 2209 | 11v-04-Icos-1vx—fe2c4—2983           | -3195.992396 | 70.0 |
| 2210 | 11v-04-Icos-1vx—fe2c4—2978           | -3195.992381 | 70.0 |
| 2211 | 11v-04-Icos-1vx—fe2c4—3074           | -3195.992379 | 70.0 |
| 2212 | 11v-03-OhfusettoPentBipyr—fe2c4—699  | -3195.99225  | 70.1 |
| 2213 | 11v-03-OhfusettoPentBipyr—fe2c4—778  | -3195.99225  | 70.1 |
| 2214 | 11v-04-Icos-1vx—fe2c4—2687           | -3195.992235 | 70.1 |
| 2215 | 11v-04-Icos-1vx—fe2c4—2699           | -3195.992234 | 70.1 |
| 2216 | 11v-03-OhfusettoPentBipyr—fe2c4—1070 | -3195.992228 | 70.1 |
| 2217 | 11v-03-OhfusettoPentBipyr—fe2c4—1106 | -3195.992225 | 70.1 |
| 2218 | 11v-03-OhfusettoPentBipyr—fe2c4—605  | -3195.992091 | 70.2 |
| 2219 | 11v-04-Icos-1vx—fe2c4—2267           | -3195.991993 | 70.3 |
| 2220 | 11v-04-Icos-1vx—fe2c4—1894           | -3195.991643 | 70.5 |
| 2221 | 11v-03-OhfusettoPentBipyr—fe2c4—1349 | -3195.991193 | 70.8 |
| 2222 | 11v-04-Icos-1vx—fe2c4—3083           | -3195.991107 | 70.8 |
| 2223 | 11v-04-Icos-1vx—fe2c4—1799           | -3195.990691 | 71.1 |
| 2224 | 11v-04-Icos-1vx—fe2c4—1835           | -3195.990691 | 71.1 |
| 2225 | 11v-03-OhfusettoPentBipyr—fe2c4—785  | -3195.990574 | 71.1 |
| 2226 | 11v-04-Icos-1vx—fe2c4—1408           | -3195.990558 | 71.2 |
| 2227 | 11v-04-Icos-1vx—fe2c4—2748           | -3195.9905   | 71.2 |
| 2228 | 11v-04-Icos-1vx—fe2c4—3225           | -3195.990488 | 71.2 |
| 2229 | 11v-04-Icos-1vx—fe2c4—3100           | -3195.990485 | 71.2 |
| 2230 | 11v-04-Icos-1vx—fe2c4—3211           | -3195.990484 | 71.2 |
| 2231 | 11v-04-Icos-1vx—fe2c4—3219           | -3195.990484 | 71.2 |
| 2232 | 11v-03-OhfusettoPentBipyr—fe2c4—1105 | -3195.990296 | 71.3 |
| 2233 | 11v-04-Icos-1vx—fe2c4—3271           | -3195.990254 | 71.3 |
| 2234 | 11v-04-Icos-1vx—fe2c4—3125           | -3195.990176 | 71.4 |
| 2235 | 11v-04-Icos-1vx—fe2c4—3143           | -3195.990174 | 71.4 |
| 2236 | 11v-03-OhfusettoPentBipyr—fe2c4—1063 | -3195.990173 | 71.4 |
| 2237 | 11v-03-OhfusettoPentBipyr—fe2c4—1090 | -3195.990173 | 71.4 |
| 2238 | 11v-03-OhfusettoPentBipyr—fe2c4—1099 | -3195.990173 | 71.4 |
| 2239 | 11v-03-OhfusettoPentBipyr—fe2c4—1132 | -3195.990173 | 71.4 |
| 2240 | 11v-03-OhfusettoPentBipyr—fe2c4—1138 | -3195.990173 | 71.4 |
| 2241 | 11v-04-Icos-1vx—fe2c4—3119           | -3195.990168 | 71.4 |



|      |                                      |              |      |
|------|--------------------------------------|--------------|------|
| 2242 | 11v-03-OhfusettoPentBipyr—fe2c4—1136 | -3195.990156 | 71.4 |
| 2243 | 11v-03-OhfusettoPentBipyr—fe2c4—1088 | -3195.990155 | 71.4 |
| 2244 | 11v-04-Icos-1vx—fe2c4—2660           | -3195.990149 | 71.4 |
| 2245 | 11v-04-Icos-1vx—fe2c4—2711           | -3195.990143 | 71.4 |
| 2246 | 11v-03-OhfusettoPentBipyr—fe2c4—1130 | -3195.990142 | 71.4 |
| 2247 | 11v-04-Icos-1vx—fe2c4—2684           | -3195.990142 | 71.4 |
| 2248 | 11v-04-Icos-1vx—fe2c4—2701           | -3195.990137 | 71.4 |
| 2249 | 11v-04-Icos-1vx—fe2c4—2784           | -3195.990132 | 71.4 |
| 2250 | 11v-04-Icos-1vx—fe2c4—2644           | -3195.990125 | 71.4 |
| 2251 | 11v-04-Icos-1vx—fe2c4—2709           | -3195.990125 | 71.4 |
| 2252 | 11v-04-Icos-1vx—fe2c4—2637           | -3195.990115 | 71.4 |
| 2253 | 11v-04-Icos-1vx—fe2c4—2629           | -3195.990101 | 71.4 |
| 2254 | 11v-04-Icos-1vx—fe2c4—2682           | -3195.990091 | 71.4 |
| 2255 | 11v-04-Icos-1vx—fe2c4—2607           | -3195.989978 | 71.5 |
| 2256 | 11v-04-Icos-1vx—fe2c4—2613           | -3195.989972 | 71.5 |
| 2257 | 11v-04-Icos-1vx—fe2c4—1923           | -3195.989933 | 71.5 |
| 2258 | 11v-04-Icos-1vx—fe2c4—2313           | -3195.989892 | 71.6 |
| 2259 | 11v-04-Icos-1vx—fe2c4—2358           | -3195.98989  | 71.6 |
| 2260 | 11v-04-Icos-1vx—fe2c4—1356           | -3195.989805 | 71.6 |
| 2261 | 11v-04-Icos-1vx—fe2c4—1514           | -3195.989767 | 71.6 |
| 2262 | 11v-04-Icos-1vx—fe2c4—1481           | -3195.989764 | 71.7 |
| 2263 | 11v-04-Icos-1vx—fe2c4—1460           | -3195.989762 | 71.7 |
| 2264 | 11v-04-Icos-1vx—fe2c4—1454           | -3195.989761 | 71.7 |
| 2265 | 11v-04-Icos-1vx—fe2c4—1535           | -3195.98976  | 71.7 |
| 2266 | 11v-04-Icos-1vx—fe2c4—1553           | -3195.989758 | 71.7 |
| 2267 | 11v-03-OhfusettoPentBipyr—fe2c4—972  | -3195.989585 | 71.8 |
| 2268 | 11v-04-Icos-1vx—fe2c4—2035           | -3195.989403 | 71.9 |
| 2269 | 11v-04-Icos-1vx—fe2c4—2030           | -3195.98926  | 72.0 |
| 2270 | 11v-04-Icos-1vx—fe2c4—2043           | -3195.989234 | 72.0 |
| 2271 | 11v-04-Icos-1vx—fe2c4—2067           | -3195.989232 | 72.0 |
| 2272 | 11v-04-Icos-1vx—fe2c4—2437           | -3195.989224 | 72.0 |
| 2273 | 11v-04-Icos-1vx—fe2c4—2539           | -3195.989224 | 72.0 |
| 2274 | 11v-04-Icos-1vx—fe2c4—2101           | -3195.989213 | 72.0 |
| 2275 | 11v-04-Icos-1vx—fe2c4—2439           | -3195.989213 | 72.0 |
| 2276 | 11v-04-Icos-1vx—fe2c4—2541           | -3195.989213 | 72.0 |
| 2277 | 11v-04-Icos-1vx—fe2c4—1362           | -3195.989185 | 72.0 |
| 2278 | 11v-04-Icos-1vx—fe2c4—1380           | -3195.989185 | 72.0 |
| 2279 | 11v-03-OhfusettoPentBipyr—fe2c4—576  | -3195.988929 | 72.2 |
| 2280 | 11v-04-Icos-1vx—fe2c4—2228           | -3195.988841 | 72.2 |
| 2281 | 11v-04-Icos-1vx—fe2c4—2117           | -3195.988689 | 72.3 |
| 2282 | 11v-03-OhfusettoPentBipyr—fe2c4—677  | -3195.988516 | 72.4 |
| 2283 | 11v-04-Icos-1vx—fe2c4—2256           | -3195.988483 | 72.5 |
| 2284 | 11v-04-Icos-1vx—fe2c4—2799           | -3195.988442 | 72.5 |
| 2285 | 11v-04-Icos-1vx—fe2c4—2862           | -3195.988441 | 72.5 |
| 2286 | 11v-04-Icos-1vx—fe2c4—2252           | -3195.988391 | 72.5 |
| 2287 | 11v-04-Icos-1vx—fe2c4—2246           | -3195.988377 | 72.5 |
| 2288 | 11v-04-Icos-1vx—fe2c4—2222           | -3195.988375 | 72.5 |
| 2289 | 11v-01-PentaCapTrPr—fe2c4—18         | -3195.988337 | 72.5 |
| 2290 | 11v-03-OhfusettoPentBipyr—fe2c4—1194 | -3195.988307 | 72.6 |
| 2291 | 11v-04-Icos-1vx—fe2c4—1475           | -3195.988086 | 72.7 |
| 2292 | 11v-04-Icos-1vx—fe2c4—2824           | -3195.988086 | 72.7 |

|      |                                      |              |      |
|------|--------------------------------------|--------------|------|
| 2293 | 11v-04-Icos-1vx—fe2c4—1457           | -3195.988084 | 72.7 |
| 2294 | 11v-04-Icos-1vx—fe2c4—1463           | -3195.988084 | 72.7 |
| 2295 | 11v-04-Icos-1vx—fe2c4—1529           | -3195.988084 | 72.7 |
| 2296 | 11v-04-Icos-1vx—fe2c4—1547           | -3195.988084 | 72.7 |
| 2297 | 11v-04-Icos-1vx—fe2c4—1517           | -3195.988083 | 72.7 |
| 2298 | 11v-04-Icos-1vx—fe2c4—3217           | -3195.988082 | 72.7 |
| 2299 | 11v-04-Icos-1vx—fe2c4—3181           | -3195.988067 | 72.7 |
| 2300 | 11v-04-Icos-1vx—fe2c4—3020           | -3195.988038 | 72.7 |
| 2301 | 11v-04-Icos-1vx—fe2c4—2991           | -3195.988031 | 72.7 |
| 2302 | 11v-04-Icos-1vx—fe2c4—2455           | -3195.987803 | 72.9 |
| 2303 | 11v-04-Icos-1vx—fe2c4—2478           | -3195.987803 | 72.9 |
| 2304 | 11v-02-TricapCube—fe2c4—364          | -3195.987651 | 73.0 |
| 2305 | 11v-04-Icos-1vx—fe2c4—3026           | -3195.987584 | 73.0 |
| 2306 | 11v-04-Icos-1vx—fe2c4—2997           | -3195.987581 | 73.0 |
| 2307 | 11v-04-Icos-1vx—fe2c4—2209           | -3195.987515 | 73.1 |
| 2308 | 11v-04-Icos-1vx—fe2c4—2848           | -3195.987503 | 73.1 |
| 2309 | 11v-04-Icos-1vx—fe2c4—2890           | -3195.987247 | 73.2 |
| 2310 | 11v-04-Icos-1vx—fe2c4—2154           | -3195.987068 | 73.3 |
| 2311 | 11v-04-Icos-1vx—fe2c4—3039           | -3195.98703  | 73.4 |
| 2312 | 11v-04-Icos-1vx—fe2c4—3044           | -3195.986999 | 73.4 |
| 2313 | 11v-04-Icos-1vx—fe2c4—2142           | -3195.986922 | 73.4 |
| 2314 | 11v-04-Icos-1vx—fe2c4—2165           | -3195.98692  | 73.4 |
| 2315 | 11v-04-Icos-1vx—fe2c4—2115           | -3195.9869   | 73.4 |
| 2316 | 11v-04-Icos-1vx—fe2c4—2846           | -3195.986881 | 73.5 |
| 2317 | 11v-04-Icos-1vx—fe2c4—2139           | -3195.986867 | 73.5 |
| 2318 | 11v-04-Icos-1vx—fe2c4—2339           | -3195.986795 | 73.5 |
| 2319 | 11v-04-Icos-1vx—fe2c4—2234           | -3195.986786 | 73.5 |
| 2320 | 11v-03-OhfusettoPentBipyr—fe2c4—694  | -3195.986659 | 73.6 |
| 2321 | 11v-04-Icos-1vx—fe2c4—2227           | -3195.986568 | 73.7 |
| 2322 | 11v-04-Icos-1vx—fe2c4—2718           | -3195.986563 | 73.7 |
| 2323 | 11v-04-Icos-1vx—fe2c4—2171           | -3195.986472 | 73.7 |
| 2324 | 11v-04-Icos-1vx—fe2c4—2079           | -3195.986083 | 74.0 |
| 2325 | 11v-04-Icos-1vx—fe2c4—2010           | -3195.986034 | 74.0 |
| 2326 | 11v-04-Icos-1vx—fe2c4—2199           | -3195.985984 | 74.0 |
| 2327 | 11v-03-OhfusettoPentBipyr—fe2c4—858  | -3195.985863 | 74.1 |
| 2328 | 11v-03-OhfusettoPentBipyr—fe2c4—752  | -3195.98586  | 74.1 |
| 2329 | 11v-03-OhfusettoPentBipyr—fe2c4—686  | -3195.985857 | 74.1 |
| 2330 | 11v-03-OhfusettoPentBipyr—fe2c4—679  | -3195.985852 | 74.1 |
| 2331 | 11v-03-OhfusettoPentBipyr—fe2c4—746  | -3195.985848 | 74.1 |
| 2332 | 11v-01-PentaCapTrPr—fe2c4—168        | -3195.985544 | 74.3 |
| 2333 | 11v-04-Icos-1vx—fe2c4—2325           | -3195.985523 | 74.3 |
| 2334 | 11v-03-OhfusettoPentBipyr—fe2c4—782  | -3195.985501 | 74.3 |
| 2335 | 11v-04-Icos-1vx—fe2c4—2260           | -3195.985322 | 74.4 |
| 2336 | 11v-01-PentaCapTrPr—fe2c4—156        | -3195.984934 | 74.7 |
| 2337 | 11v-03-OhfusettoPentBipyr—fe2c4—736  | -3195.984738 | 74.8 |
| 2338 | 11v-03-OhfusettoPentBipyr—fe2c4—766  | -3195.984738 | 74.8 |
| 2339 | 11v-02-TricapCube—fe2c4—234          | -3195.984641 | 74.9 |
| 2340 | 11v-02-TricapCube—fe2c4—246          | -3195.984617 | 74.9 |
| 2341 | 11v-03-OhfusettoPentBipyr—fe2c4—1284 | -3195.984553 | 74.9 |
| 2342 | 11v-04-Icos-1vx—fe2c4—1483           | -3195.98444  | 75.0 |
| 2343 | 11v-04-Icos-1vx—fe2c4—1501           | -3195.984439 | 75.0 |

|      |                                        |              |      |
|------|----------------------------------------|--------------|------|
| 2344 | 11v-04-Icos-1vx— fe2c4— 1525           | -3195.984439 | 75.0 |
| 2345 | 11v-04-Icos-1vx— fe2c4— 2957           | -3195.984279 | 75.1 |
| 2346 | 11v-04-Icos-1vx— fe2c4— 2945           | -3195.98427  | 75.1 |
| 2347 | 11v-04-Icos-1vx— fe2c4— 2939           | -3195.984269 | 75.1 |
| 2348 | 11v-03-OhfusettoPentBipyr— fe2c4— 1013 | -3195.984221 | 75.1 |
| 2349 | 11v-04-Icos-1vx— fe2c4— 1459           | -3195.984043 | 75.2 |
| 2350 | 11v-04-Icos-1vx— fe2c4— 1490           | -3195.984043 | 75.2 |
| 2351 | 11v-04-Icos-1vx— fe2c4— 1511           | -3195.984043 | 75.2 |
| 2352 | 11v-03-OhfusettoPentBipyr— fe2c4— 755  | -3195.983951 | 75.3 |
| 2353 | 11v-03-OhfusettoPentBipyr— fe2c4— 692  | -3195.983843 | 75.4 |
| 2354 | 11v-03-OhfusettoPentBipyr— fe2c4— 710  | -3195.983843 | 75.4 |
| 2355 | 11v-04-Icos-1vx— fe2c4— 2333           | -3195.983773 | 75.4 |
| 2356 | 11v-04-Icos-1vx— fe2c4— 2351           | -3195.983759 | 75.4 |
| 2357 | 11v-01-PentaCapTrPr— fe2c4— 101        | -3195.983563 | 75.5 |
| 2358 | 11v-03-OhfusettoPentBipyr— fe2c4— 534  | -3195.983223 | 75.8 |
| 2359 | 11v-04-Icos-1vx— fe2c4— 1982           | -3195.983168 | 75.8 |
| 2360 | 11v-04-Icos-1vx— fe2c4— 2078           | -3195.983096 | 75.8 |
| 2361 | 11v-04-Icos-1vx— fe2c4— 2233           | -3195.982994 | 75.9 |
| 2362 | 11v-04-Icos-1vx— fe2c4— 2577           | -3195.982936 | 75.9 |
| 2363 | 11v-03-OhfusettoPentBipyr— fe2c4— 587  | -3195.982797 | 76.0 |
| 2364 | 11v-03-OhfusettoPentBipyr— fe2c4— 628  | -3195.982797 | 76.0 |
| 2365 | 11v-03-OhfusettoPentBipyr— fe2c4— 617  | -3195.982647 | 76.1 |
| 2366 | 11v-03-OhfusettoPentBipyr— fe2c4— 634  | -3195.982647 | 76.1 |
| 2367 | 11v-03-OhfusettoPentBipyr— fe2c4— 626  | -3195.982644 | 76.1 |
| 2368 | 11v-04-Icos-1vx— fe2c4— 2458           | -3195.982528 | 76.2 |
| 2369 | 11v-04-Icos-1vx— fe2c4— 2473           | -3195.982528 | 76.2 |
| 2370 | 11v-04-Icos-1vx— fe2c4— 2338           | -3195.982492 | 76.2 |
| 2371 | 11v-03-OhfusettoPentBipyr— fe2c4— 756  | -3195.98242  | 76.3 |
| 2372 | 11v-04-Icos-1vx— fe2c4— 2136           | -3195.982233 | 76.4 |
| 2373 | 11v-04-Icos-1vx— fe2c4— 2148           | -3195.982233 | 76.4 |
| 2374 | 11v-04-Icos-1vx— fe2c4— 2112           | -3195.9822   | 76.4 |
| 2375 | 11v-04-Icos-1vx— fe2c4— 2236           | -3195.982086 | 76.5 |
| 2376 | 11v-04-Icos-1vx— fe2c4— 2195           | -3195.982078 | 76.5 |
| 2377 | 11v-03-OhfusettoPentBipyr— fe2c4— 897  | -3195.982027 | 76.5 |
| 2378 | 11v-04-Icos-1vx— fe2c4— 2556           | -3195.981994 | 76.5 |
| 2379 | 11v-03-OhfusettoPentBipyr— fe2c4— 1072 | -3195.98192  | 76.6 |
| 2380 | 11v-03-OhfusettoPentBipyr— fe2c4— 1060 | -3195.981913 | 76.6 |
| 2381 | 11v-03-OhfusettoPentBipyr— fe2c4— 901  | -3195.981896 | 76.6 |
| 2382 | 11v-01-PentaCapTrPr— fe2c4— 158        | -3195.981872 | 76.6 |
| 2383 | 11v-04-Icos-1vx— fe2c4— 2689           | -3195.981823 | 76.6 |
| 2384 | 11v-04-Icos-1vx— fe2c4— 2721           | -3195.981823 | 76.6 |
| 2385 | 11v-04-Icos-1vx— fe2c4— 2734           | -3195.981819 | 76.6 |
| 2386 | 11v-04-Icos-1vx— fe2c4— 2683           | -3195.981818 | 76.6 |
| 2387 | 11v-04-Icos-1vx— fe2c4— 2710           | -3195.981816 | 76.6 |
| 2388 | 11v-01-PentaCapTrPr— fe2c4— 180        | -3195.981698 | 76.7 |
| 2389 | 11v-03-OhfusettoPentBipyr— fe2c4— 872  | -3195.98169  | 76.7 |
| 2390 | 11v-04-Icos-1vx— fe2c4— 3203           | -3195.981576 | 76.8 |
| 2391 | 11v-04-Icos-1vx— fe2c4— 3221           | -3195.981567 | 76.8 |
| 2392 | 11v-04-Icos-1vx— fe2c4— 3227           | -3195.981561 | 76.8 |
| 2393 | 11v-02-TricapCubeA— fe2c4— 193         | -3195.981558 | 76.8 |
| 2394 | 11v-04-Icos-1vx— fe2c4— 1496           | -3195.981476 | 76.9 |

|      |                                          |              |      |
|------|------------------------------------------|--------------|------|
| 2395 | 11v-03-OhfusettoPentBipyr — fe2c4 — 1145 | -3195.981366 | 76.9 |
| 2396 | 11v-04-Icos-1vx — fe2c4 — 2917           | -3195.981254 | 77.0 |
| 2397 | 11v-04-Icos-1vx — fe2c4 — 3055           | -3195.981254 | 77.0 |
| 2398 | 11v-04-Icos-1vx — fe2c4 — 3025           | -3195.981253 | 77.0 |
| 2399 | 11v-04-Icos-1vx — fe2c4 — 3018           | -3195.98125  | 77.0 |
| 2400 | 11v-04-Icos-1vx — fe2c4 — 1433           | -3195.981077 | 77.1 |
| 2401 | 11v-04-Icos-1vx — fe2c4 — 2829           | -3195.980972 | 77.2 |
| 2402 | 11v-04-Icos-1vx — fe2c4 — 2194           | -3195.980968 | 77.2 |
| 2403 | 11v-04-Icos-1vx — fe2c4 — 2815           | -3195.980964 | 77.2 |
| 2404 | 11v-04-Icos-1vx — fe2c4 — 2365           | -3195.980959 | 77.2 |
| 2405 | 11v-04-Icos-1vx — fe2c4 — 2367           | -3195.980909 | 77.2 |
| 2406 | 11v-04-Icos-1vx — fe2c4 — 1977           | -3195.980858 | 77.2 |
| 2407 | 11v-04-Icos-1vx — fe2c4 — 2355           | -3195.980852 | 77.2 |
| 2408 | 11v-04-Icos-1vx — fe2c4 — 1998           | -3195.980848 | 77.2 |
| 2409 | 11v-04-Icos-1vx — fe2c4 — 1989           | -3195.980813 | 77.3 |
| 2410 | 11v-04-Icos-1vx — fe2c4 — 2085           | -3195.980806 | 77.3 |
| 2411 | 11v-04-Icos-1vx — fe2c4 — 2016           | -3195.980804 | 77.3 |
| 2412 | 11v-04-Icos-1vx — fe2c4 — 2314           | -3195.980641 | 77.4 |
| 2413 | 11v-04-Icos-1vx — fe2c4 — 2359           | -3195.980639 | 77.4 |
| 2414 | 11v-04-Icos-1vx — fe2c4 — 1432           | -3195.980411 | 77.5 |
| 2415 | 11v-04-Icos-1vx — fe2c4 — 1453           | -3195.980276 | 77.6 |
| 2416 | 11v-04-Icos-1vx — fe2c4 — 1480           | -3195.980273 | 77.6 |
| 2417 | 11v-04-Icos-1vx — fe2c4 — 1485           | -3195.980273 | 77.6 |
| 2418 | 11v-04-Icos-1vx — fe2c4 — 1534           | -3195.98027  | 77.6 |
| 2419 | 11v-04-Icos-1vx — fe2c4 — 2506           | -3195.979972 | 77.8 |
| 2420 | 11v-02-TricapCube — fe2c4 — 332          | -3195.979823 | 77.9 |
| 2421 | 11v-03-OhfusettoPentBipyr — fe2c4 — 764  | -3195.979811 | 77.9 |
| 2422 | 11v-03-OhfusettoPentBipyr — fe2c4 — 717  | -3195.979783 | 77.9 |
| 2423 | 11v-03-OhfusettoPentBipyr — fe2c4 — 776  | -3195.979783 | 77.9 |
| 2424 | 11v-04-Icos-1vx — fe2c4 — 2668           | -3195.979681 | 78.0 |
| 2425 | 11v-03-OhfusettoPentBipyr — fe2c4 — 971  | -3195.979669 | 78.0 |
| 2426 | 11v-04-Icos-1vx — fe2c4 — 2669           | -3195.979547 | 78.1 |
| 2427 | 11v-04-Icos-1vx — fe2c4 — 3061           | -3195.979451 | 78.1 |
| 2428 | 11v-04-Icos-1vx — fe2c4 — 3084           | -3195.979446 | 78.1 |
| 2429 | 11v-04-Icos-1vx — fe2c4 — 3057           | -3195.979428 | 78.1 |
| 2430 | 11v-04-Icos-1vx — fe2c4 — 2914           | -3195.979423 | 78.1 |
| 2431 | 11v-04-Icos-1vx — fe2c4 — 2919           | -3195.979418 | 78.1 |
| 2432 | 11v-04-Icos-1vx — fe2c4 — 3131           | -3195.979298 | 78.2 |
| 2433 | 11v-03-OhfusettoPentBipyr — fe2c4 — 924  | -3195.979291 | 78.2 |
| 2434 | 11v-04-Icos-1vx — fe2c4 — 1497           | -3195.979277 | 78.2 |
| 2435 | 11v-03-OhfusettoPentBipyr — fe2c4 — 1104 | -3195.979235 | 78.3 |
| 2436 | 11v-03-OhfusettoPentBipyr — fe2c4 — 1146 | -3195.979235 | 78.3 |
| 2437 | 11v-04-Icos-1vx — fe2c4 — 2615           | -3195.979202 | 78.3 |
| 2438 | 11v-03-OhfusettoPentBipyr — fe2c4 — 1110 | -3195.979178 | 78.3 |
| 2439 | 11v-03-OhfusettoPentBipyr — fe2c4 — 847  | -3195.979085 | 78.4 |
| 2440 | 11v-03-OhfusettoPentBipyr — fe2c4 — 669  | -3195.979074 | 78.4 |
| 2441 | 11v-03-OhfusettoPentBipyr — fe2c4 — 862  | -3195.979065 | 78.4 |
| 2442 | 11v-03-OhfusettoPentBipyr — fe2c4 — 723  | -3195.979041 | 78.4 |
| 2443 | 11v-03-OhfusettoPentBipyr — fe2c4 — 678  | -3195.979034 | 78.4 |
| 2444 | 11v-03-OhfusettoPentBipyr — fe2c4 — 684  | -3195.978886 | 78.5 |
| 2445 | 11v-03-OhfusettoPentBipyr — fe2c4 — 732  | -3195.978886 | 78.5 |

|      |                                         |              |      |
|------|-----------------------------------------|--------------|------|
| 2446 | 11v-02-TricapCube — fe2c4 — 435         | -3195.978849 | 78.5 |
| 2447 | 11v-02-TricapCube — fe2c4 — 405         | -3195.978836 | 78.5 |
| 2448 | 11v-03-OhfusetopentBipyr — fe2c4 — 834  | -3195.978811 | 78.5 |
| 2449 | 11v-03-OhfusetopentBipyr — fe2c4 — 837  | -3195.97881  | 78.5 |
| 2450 | 11v-03-OhfusetopentBipyr — fe2c4 — 788  | -3195.978789 | 78.5 |
| 2451 | 11v-02-TricapCube — fe2c4 — 408         | -3195.978788 | 78.5 |
| 2452 | 11v-04-Icos-1vx — fe2c4 — 2979          | -3195.978721 | 78.6 |
| 2453 | 11v-03-OhfusetopentBipyr — fe2c4 — 795  | -3195.978639 | 78.6 |
| 2454 | 11v-03-OhfusetopentBipyr — fe2c4 — 874  | -3195.978639 | 78.6 |
| 2455 | 11v-04-Icos-1vx — fe2c4 — 3008          | -3195.978638 | 78.6 |
| 2456 | 11v-03-OhfusetopentBipyr — fe2c4 — 801  | -3195.978632 | 78.6 |
| 2457 | 11v-04-Icos-1vx — fe2c4 — 2998          | -3195.978508 | 78.7 |
| 2458 | 11v-03-OhfusetopentBipyr — fe2c4 — 839  | -3195.978445 | 78.8 |
| 2459 | 11v-03-OhfusetopentBipyr — fe2c4 — 893  | -3195.978438 | 78.8 |
| 2460 | 11v-03-OhfusetopentBipyr — fe2c4 — 845  | -3195.978389 | 78.8 |
| 2461 | 11v-03-OhfusetopentBipyr — fe2c4 — 809  | -3195.978356 | 78.8 |
| 2462 | 11v-04-Icos-1vx — fe2c4 — 2987          | -3195.978322 | 78.8 |
| 2463 | 11v-04-Icos-1vx — fe2c4 — 3059          | -3195.978272 | 78.9 |
| 2464 | 11v-04-Icos-1vx — fe2c4 — 2985          | -3195.97827  | 78.9 |
| 2465 | 11v-04-Icos-1vx — fe2c4 — 2990          | -3195.978265 | 78.9 |
| 2466 | 11v-04-Icos-1vx — fe2c4 — 3017          | -3195.978264 | 78.9 |
| 2467 | 11v-04-Icos-1vx — fe2c4 — 3086          | -3195.978264 | 78.9 |
| 2468 | 11v-04-Icos-1vx — fe2c4 — 2993          | -3195.978256 | 78.9 |
| 2469 | 11v-04-Icos-1vx — fe2c4 — 3023          | -3195.978249 | 78.9 |
| 2470 | 11v-04-Icos-1vx — fe2c4 — 3089          | -3195.978245 | 78.9 |
| 2471 | 11v-04-Icos-1vx — fe2c4 — 1355          | -3195.977432 | 79.4 |
| 2472 | 11v-04-Icos-1vx — fe2c4 — 1367          | -3195.977432 | 79.4 |
| 2473 | 11v-04-Icos-1vx — fe2c4 — 1368          | -3195.977376 | 79.4 |
| 2474 | 11v-03-OhfusetopentBipyr — fe2c4 — 1061 | -3195.977312 | 79.5 |
| 2475 | 11v-03-OhfusetopentBipyr — fe2c4 — 1073 | -3195.977312 | 79.5 |
| 2476 | 11v-04-Icos-1vx — fe2c4 — 2559          | -3195.977261 | 79.5 |
| 2477 | 11v-04-Icos-1vx — fe2c4 — 2116          | -3195.976997 | 79.7 |
| 2478 | 11v-04-Icos-1vx — fe2c4 — 2835          | -3195.976967 | 79.7 |
| 2479 | 11v-04-Icos-1vx — fe2c4 — 2776          | -3195.976754 | 79.8 |
| 2480 | 11v-04-Icos-1vx — fe2c4 — 2746          | -3195.976723 | 79.8 |
| 2481 | 11v-01-PentaCapTrPr — fe2c4 — 39        | -3195.976659 | 79.9 |
| 2482 | 11v-03-OhfusetopentBipyr — fe2c4 — 813  | -3195.976559 | 79.9 |
| 2483 | 11v-03-OhfusetopentBipyr — fe2c4 — 855  | -3195.976559 | 79.9 |
| 2484 | 11v-03-OhfusetopentBipyr — fe2c4 — 867  | -3195.976559 | 79.9 |
| 2485 | 11v-03-OhfusetopentBipyr — fe2c4 — 871  | -3195.976559 | 79.9 |
| 2486 | 11v-03-OhfusetopentBipyr — fe2c4 — 913  | -3195.976559 | 79.9 |
| 2487 | 11v-01-PentaCapTrPr — fe2c4 — 102       | -3195.976165 | 80.2 |
| 2488 | 11v-04-Icos-1vx — fe2c4 — 2340          | -3195.975632 | 80.5 |
| 2489 | 11v-04-Icos-1vx — fe2c4 — 2289          | -3195.975577 | 80.6 |
| 2490 | 11v-04-Icos-1vx — fe2c4 — 2536          | -3195.975568 | 80.6 |
| 2491 | 11v-04-Icos-1vx — fe2c4 — 2500          | -3195.975563 | 80.6 |
| 2492 | 11v-01-PentaCapTrPr — fe2c4 — 9         | -3195.975534 | 80.6 |
| 2493 | 11v-03-OhfusetopentBipyr — fe2c4 — 1240 | -3195.975485 | 80.6 |
| 2494 | 11v-03-OhfusetopentBipyr — fe2c4 — 557  | -3195.975401 | 80.7 |
| 2495 | 11v-04-Icos-1vx — fe2c4 — 2051          | -3195.975304 | 80.7 |
| 2496 | 11v-04-Icos-1vx — fe2c4 — 1978          | -3195.97527  | 80.7 |

|      |                                          |              |      |
|------|------------------------------------------|--------------|------|
| 2497 | 11v-03-OhfusettoPentBipyr — fe2c4 — 479  | -3195.975111 | 80.8 |
| 2498 | 11v-03-OhfusettoPentBipyr — fe2c4 — 491  | -3195.975108 | 80.8 |
| 2499 | 11v-04-Icos-1vx — fe2c4 — 2840           | -3195.975061 | 80.9 |
| 2500 | 11v-04-Icos-1vx — fe2c4 — 2865           | -3195.975055 | 80.9 |
| 2501 | 11v-03-OhfusettoPentBipyr — fe2c4 — 859  | -3195.974998 | 80.9 |
| 2502 | 11v-04-Icos-1vx — fe2c4 — 2851           | -3195.974991 | 80.9 |
| 2503 | 11v-04-Icos-1vx — fe2c4 — 2471           | -3195.974789 | 81.0 |
| 2504 | 11v-04-Icos-1vx — fe2c4 — 2477           | -3195.974789 | 81.0 |
| 2505 | 11v-04-Icos-1vx — fe2c4 — 2483           | -3195.974789 | 81.0 |
| 2506 | 11v-04-Icos-1vx — fe2c4 — 1365           | -3195.97476  | 81.1 |
| 2507 | 11v-04-Icos-1vx — fe2c4 — 1823           | -3195.974655 | 81.1 |
| 2508 | 11v-04-Icos-1vx — fe2c4 — 2831           | -3195.974531 | 81.2 |
| 2509 | 11v-03-OhfusettoPentBipyr — fe2c4 — 1297 | -3195.974429 | 81.3 |
| 2510 | 11v-03-OhfusettoPentBipyr — fe2c4 — 1303 | -3195.974429 | 81.3 |
| 2511 | 11v-03-OhfusettoPentBipyr — fe2c4 — 1327 | -3195.974429 | 81.3 |
| 2512 | 11v-03-OhfusettoPentBipyr — fe2c4 — 1152 | -3195.974406 | 81.3 |
| 2513 | 11v-04-Icos-1vx — fe2c4 — 2311           | -3195.974374 | 81.3 |
| 2514 | 11v-04-Icos-1vx — fe2c4 — 2370           | -3195.974303 | 81.4 |
| 2515 | 11v-01-PentaCapTrPr — fe2c4 — 184        | -3195.97426  | 81.4 |
| 2516 | 11v-04-Icos-1vx — fe2c4 — 1915           | -3195.974145 | 81.5 |
| 2517 | 11v-04-Icos-1vx — fe2c4 — 2728           | -3195.974103 | 81.5 |
| 2518 | 11v-04-Icos-1vx — fe2c4 — 1948           | -3195.974039 | 81.5 |
| 2519 | 11v-04-Icos-1vx — fe2c4 — 2303           | -3195.974002 | 81.5 |
| 2520 | 11v-04-Icos-1vx — fe2c4 — 1360           | -3195.973987 | 81.6 |
| 2521 | 11v-04-Icos-1vx — fe2c4 — 1377           | -3195.973987 | 81.6 |
| 2522 | 11v-02-TricapCube — fe2c4 — 367          | -3195.973736 | 81.7 |
| 2523 | 11v-02-TricapCube — fe2c4 — 430          | -3195.973736 | 81.7 |
| 2524 | 11v-04-Icos-1vx — fe2c4 — 2052           | -3195.973634 | 81.8 |
| 2525 | 11v-04-Icos-1vx — fe2c4 — 1726           | -3195.973377 | 81.9 |
| 2526 | 11v-04-Icos-1vx — fe2c4 — 1720           | -3195.973354 | 81.9 |
| 2527 | 11v-03-OhfusettoPentBipyr — fe2c4 — 857  | -3195.973164 | 82.1 |
| 2528 | 11v-04-Icos-1vx — fe2c4 — 2226           | -3195.973048 | 82.1 |
| 2529 | 11v-04-Icos-1vx — fe2c4 — 1661           | -3195.972971 | 82.2 |
| 2530 | 11v-04-Icos-1vx — fe2c4 — 1639           | -3195.97295  | 82.2 |
| 2531 | 11v-04-Icos-1vx — fe2c4 — 1633           | -3195.972946 | 82.2 |
| 2532 | 11v-04-Icos-1vx — fe2c4 — 2217           | -3195.972917 | 82.2 |
| 2533 | 11v-04-Icos-1vx — fe2c4 — 2175           | -3195.972887 | 82.2 |
| 2534 | 11v-04-Icos-1vx — fe2c4 — 2169           | -3195.972886 | 82.2 |
| 2535 | 11v-04-Icos-1vx — fe2c4 — 2158           | -3195.972849 | 82.3 |
| 2536 | 11v-04-Icos-1vx — fe2c4 — 2152           | -3195.972751 | 82.3 |
| 2537 | 11v-04-Icos-1vx — fe2c4 — 2210           | -3195.972647 | 82.4 |
| 2538 | 11v-02-TricapCube — fe2c4 — 422          | -3195.972463 | 82.5 |
| 2539 | 11v-03-OhfusettoPentBipyr — fe2c4 — 1313 | -3195.972332 | 82.6 |
| 2540 | 11v-03-OhfusettoPentBipyr — fe2c4 — 1190 | -3195.972194 | 82.7 |
| 2541 | 11v-02-TricapCube — fe2c4 — 373          | -3195.972117 | 82.7 |
| 2542 | 11v-03-OhfusettoPentBipyr — fe2c4 — 1344 | -3195.97206  | 82.8 |
| 2543 | 11v-02-TricapCube — fe2c4 — 433          | -3195.972044 | 82.8 |
| 2544 | 11v-02-TricapCube — fe2c4 — 403          | -3195.972035 | 82.8 |
| 2545 | 11v-02-TricapCube — fe2c4 — 421          | -3195.972029 | 82.8 |
| 2546 | 11v-02-TricapCube — fe2c4 — 397          | -3195.971917 | 82.9 |
| 2547 | 11v-02-TricapCube — fe2c4 — 404          | -3195.971917 | 82.9 |

|      |                                      |              |      |
|------|--------------------------------------|--------------|------|
| 2548 | 11v-02-TricapCube—fe2c4—434          | -3195.971917 | 82.9 |
| 2549 | 11v-02-TricapCube—fe2c4—374          | -3195.971562 | 83.1 |
| 2550 | 11v-04-Icos-1vx—fe2c4—2300           | -3195.97146  | 83.1 |
| 2551 | 11v-04-Icos-1vx—fe2c4—1980           | -3195.971458 | 83.1 |
| 2552 | 11v-04-Icos-1vx—fe2c4—3019           | -3195.971455 | 83.1 |
| 2553 | 11v-04-Icos-1vx—fe2c4—2106           | -3195.97145  | 83.1 |
| 2554 | 11v-04-Icos-1vx—fe2c4—3007           | -3195.971443 | 83.1 |
| 2555 | 11v-04-Icos-1vx—fe2c4—3079           | -3195.971438 | 83.2 |
| 2556 | 11v-03-OhfusettoPentBipyr—fe2c4—571  | -3195.971311 | 83.2 |
| 2557 | 11v-04-Icos-1vx—fe2c4—2999           | -3195.971105 | 83.4 |
| 2558 | 11v-04-Icos-1vx—fe2c4—3029           | -3195.971102 | 83.4 |
| 2559 | 11v-04-Icos-1vx—fe2c4—2984           | -3195.971097 | 83.4 |
| 2560 | 11v-03-OhfusettoPentBipyr—fe2c4—674  | -3195.971028 | 83.4 |
| 2561 | 11v-03-OhfusettoPentBipyr—fe2c4—704  | -3195.971028 | 83.4 |
| 2562 | 11v-03-OhfusettoPentBipyr—fe2c4—680  | -3195.971027 | 83.4 |
| 2563 | 11v-03-OhfusettoPentBipyr—fe2c4—709  | -3195.97102  | 83.4 |
| 2564 | 11v-03-OhfusettoPentBipyr—fe2c4—689  | -3195.970831 | 83.5 |
| 2565 | 11v-03-OhfusettoPentBipyr—fe2c4—706  | -3195.970828 | 83.5 |
| 2566 | 11v-02-TricapCubeA—fe2c4—196         | -3195.970806 | 83.5 |
| 2567 | 11v-04-Icos-1vx—fe2c4—2061           | -3195.970797 | 83.6 |
| 2568 | 11v-04-Icos-1vx—fe2c4—2342           | -3195.970797 | 83.6 |
| 2569 | 11v-04-Icos-1vx—fe2c4—2102           | -3195.970742 | 83.6 |
| 2570 | 11v-04-Icos-1vx—fe2c4—2860           | -3195.97069  | 83.6 |
| 2571 | 11v-02-TricapCube—fe2c4—389          | -3195.970687 | 83.6 |
| 2572 | 11v-02-TricapCube—fe2c4—371          | -3195.970661 | 83.6 |
| 2573 | 11v-03-OhfusettoPentBipyr—fe2c4—919  | -3195.970659 | 83.6 |
| 2574 | 11v-04-Icos-1vx—fe2c4—2335           | -3195.970584 | 83.7 |
| 2575 | 11v-04-Icos-1vx—fe2c4—2830           | -3195.970497 | 83.7 |
| 2576 | 11v-03-OhfusettoPentBipyr—fe2c4—1338 | -3195.970477 | 83.8 |
| 2577 | 11v-04-Icos-1vx—fe2c4—2004           | -3195.970252 | 83.9 |
| 2578 | 11v-04-Icos-1vx—fe2c4—2190           | -3195.970227 | 83.9 |
| 2579 | 11v-04-Icos-1vx—fe2c4—1406           | -3195.970203 | 83.9 |
| 2580 | 11v-03-OhfusettoPentBipyr—fe2c4—751  | -3195.970186 | 83.9 |
| 2581 | 11v-03-OhfusettoPentBipyr—fe2c4—685  | -3195.970184 | 83.9 |
| 2582 | 11v-03-OhfusettoPentBipyr—fe2c4—745  | -3195.970181 | 83.9 |
| 2583 | 11v-03-OhfusettoPentBipyr—fe2c4—505  | -3195.970179 | 83.9 |
| 2584 | 11v-03-OhfusettoPentBipyr—fe2c4—787  | -3195.970171 | 83.9 |
| 2585 | 11v-03-OhfusettoPentBipyr—fe2c4—1109 | -3195.970119 | 84.0 |
| 2586 | 11v-03-OhfusettoPentBipyr—fe2c4—1115 | -3195.970119 | 84.0 |
| 2587 | 11v-03-OhfusettoPentBipyr—fe2c4—1151 | -3195.970119 | 84.0 |
| 2588 | 11v-04-Icos-1vx—fe2c4—2766           | -3195.970107 | 84.0 |
| 2589 | 11v-02-TricapCube—fe2c4—359          | -3195.970095 | 84.0 |
| 2590 | 11v-04-Icos-1vx—fe2c4—2749           | -3195.970091 | 84.0 |
| 2591 | 11v-04-Icos-1vx—fe2c4—1462           | -3195.970079 | 84.0 |
| 2592 | 11v-04-Icos-1vx—fe2c4—1559           | -3195.970079 | 84.0 |
| 2593 | 11v-04-Icos-1vx—fe2c4—2839           | -3195.969703 | 84.2 |
| 2594 | 11v-03-OhfusettoPentBipyr—fe2c4—720  | -3195.969639 | 84.3 |
| 2595 | 11v-03-OhfusettoPentBipyr—fe2c4—1257 | -3195.969638 | 84.3 |
| 2596 | 11v-04-Icos-1vx—fe2c4—1426           | -3195.969539 | 84.3 |
| 2597 | 11v-04-Icos-1vx—fe2c4—1354           | -3195.969415 | 84.4 |
| 2598 | 11v-04-Icos-1vx—fe2c4—1373           | -3195.969414 | 84.4 |

|      |                                        |              |      |
|------|----------------------------------------|--------------|------|
| 2599 | 11v-04-Icos-1vx— fe2c4— 2845           | -3195.969372 | 84.4 |
| 2600 | 11v-02-TricapCube— fe2c4— 370          | -3195.969196 | 84.6 |
| 2601 | 11v-02-TricapCube— fe2c4— 388          | -3195.969196 | 84.6 |
| 2602 | 11v-04-Icos-1vx— fe2c4— 2366           | -3195.969154 | 84.6 |
| 2603 | 11v-04-Icos-1vx— fe2c4— 3256           | -3195.969112 | 84.6 |
| 2604 | 11v-04-Icos-1vx— fe2c4— 1378           | -3195.968914 | 84.7 |
| 2605 | 11v-03-OhfusettoPentBipyr— fe2c4— 583  | -3195.968827 | 84.8 |
| 2606 | 11v-04-Icos-1vx— fe2c4— 2337           | -3195.968826 | 84.8 |
| 2607 | 11v-03-OhfusettoPentBipyr— fe2c4— 580  | -3195.968825 | 84.8 |
| 2608 | 11v-04-Icos-1vx— fe2c4— 2290           | -3195.96876  | 84.8 |
| 2609 | 11v-04-Icos-1vx— fe2c4— 2869           | -3195.968734 | 84.8 |
| 2610 | 11v-04-Icos-1vx— fe2c4— 2881           | -3195.968714 | 84.9 |
| 2611 | 11v-04-Icos-1vx— fe2c4— 2892           | -3195.968692 | 84.9 |
| 2612 | 11v-03-OhfusettoPentBipyr— fe2c4— 616  | -3195.968667 | 84.9 |
| 2613 | 11v-03-OhfusettoPentBipyr— fe2c4— 622  | -3195.968667 | 84.9 |
| 2614 | 11v-03-OhfusettoPentBipyr— fe2c4— 625  | -3195.968667 | 84.9 |
| 2615 | 11v-03-OhfusettoPentBipyr— fe2c4— 1097 | -3195.968627 | 84.9 |
| 2616 | 11v-03-OhfusettoPentBipyr— fe2c4— 1116 | -3195.968627 | 84.9 |
| 2617 | 11v-04-Icos-1vx— fe2c4— 2188           | -3195.96862  | 84.9 |
| 2618 | 11v-04-Icos-1vx— fe2c4— 2330           | -3195.968536 | 85.0 |
| 2619 | 11v-03-OhfusettoPentBipyr— fe2c4— 592  | -3195.968396 | 85.1 |
| 2620 | 11v-03-OhfusettoPentBipyr— fe2c4— 1233 | -3195.968361 | 85.1 |
| 2621 | 11v-04-Icos-1vx— fe2c4— 1386           | -3195.968225 | 85.2 |
| 2622 | 11v-04-Icos-1vx— fe2c4— 2047           | -3195.968225 | 85.2 |
| 2623 | 11v-03-OhfusettoPentBipyr— fe2c4— 693  | -3195.968214 | 85.2 |
| 2624 | 11v-04-Icos-1vx— fe2c4— 2356           | -3195.968199 | 85.2 |
| 2625 | 11v-02-TricapCube— fe2c4— 410          | -3195.968185 | 85.2 |
| 2626 | 11v-02-TricapCube— fe2c4— 331          | -3195.968183 | 85.2 |
| 2627 | 11v-02-TricapCube— fe2c4— 441          | -3195.968183 | 85.2 |
| 2628 | 11v-02-TricapCube— fe2c4— 440          | -3195.968177 | 85.2 |
| 2629 | 11v-04-Icos-1vx— fe2c4— 2368           | -3195.968177 | 85.2 |
| 2630 | 11v-03-OhfusettoPentBipyr— fe2c4— 800  | -3195.968136 | 85.2 |
| 2631 | 11v-04-Icos-1vx— fe2c4— 1502           | -3195.967959 | 85.3 |
| 2632 | 11v-04-Icos-1vx— fe2c4— 1489           | -3195.967958 | 85.3 |
| 2633 | 11v-04-Icos-1vx— fe2c4— 1543           | -3195.967958 | 85.3 |
| 2634 | 11v-03-OhfusettoPentBipyr— fe2c4— 599  | -3195.967956 | 85.3 |
| 2635 | 11v-03-OhfusettoPentBipyr— fe2c4— 638  | -3195.967956 | 85.3 |
| 2636 | 11v-03-OhfusettoPentBipyr— fe2c4— 658  | -3195.967956 | 85.3 |
| 2637 | 11v-03-OhfusettoPentBipyr— fe2c4— 830  | -3195.967938 | 85.3 |
| 2638 | 11v-03-OhfusettoPentBipyr— fe2c4— 881  | -3195.967827 | 85.4 |
| 2639 | 11v-03-OhfusettoPentBipyr— fe2c4— 900  | -3195.967739 | 85.5 |
| 2640 | 11v-04-Icos-1vx— fe2c4— 2091           | -3195.967622 | 85.5 |
| 2641 | 11v-04-Icos-1vx— fe2c4— 2019           | -3195.967607 | 85.6 |
| 2642 | 11v-04-Icos-1vx— fe2c4— 2140           | -3195.967429 | 85.7 |
| 2643 | 11v-04-Icos-1vx— fe2c4— 2157           | -3195.967429 | 85.7 |
| 2644 | 11v-04-Icos-1vx— fe2c4— 1383           | -3195.967389 | 85.7 |
| 2645 | 11v-04-Icos-1vx— fe2c4— 1392           | -3195.967388 | 85.7 |
| 2646 | 11v-04-Icos-1vx— fe2c4— 1357           | -3195.967387 | 85.7 |
| 2647 | 11v-04-Icos-1vx— fe2c4— 1371           | -3195.967387 | 85.7 |
| 2648 | 11v-02-TricapCube— fe2c4— 276          | -3195.967084 | 85.9 |
| 2649 | 11v-03-OhfusettoPentBipyr— fe2c4— 1234 | -3195.96686  | 86.0 |



|      |                                        |              |      |
|------|----------------------------------------|--------------|------|
| 2650 | 11v-04-Icos-1vx— fe2c4— 2143           | -3195.966763 | 86.1 |
| 2651 | 11v-04-Icos-1vx— fe2c4— 2057           | -3195.966635 | 86.2 |
| 2652 | 11v-04-Icos-1vx— fe2c4— 1973           | -3195.966606 | 86.2 |
| 2653 | 11v-04-Icos-1vx— fe2c4— 2029           | -3195.966586 | 86.2 |
| 2654 | 11v-04-Icos-1vx— fe2c4— 2278           | -3195.966531 | 86.2 |
| 2655 | 11v-04-Icos-1vx— fe2c4— 2095           | -3195.966524 | 86.2 |
| 2656 | 11v-02-TricapCube— fe2c4— 399          | -3195.966156 | 86.5 |
| 2657 | 11v-02-TricapCube— fe2c4— 413          | -3195.966143 | 86.5 |
| 2658 | 11v-03-OhfusettoPentBipyr— fe2c4— 1009 | -3195.966072 | 86.5 |
| 2659 | 11v-03-OhfusettoPentBipyr— fe2c4— 1027 | -3195.966072 | 86.5 |
| 2660 | 11v-03-OhfusettoPentBipyr— fe2c4— 955  | -3195.966072 | 86.5 |
| 2661 | 11v-03-OhfusettoPentBipyr— fe2c4— 961  | -3195.966072 | 86.5 |
| 2662 | 11v-03-OhfusettoPentBipyr— fe2c4— 967  | -3195.966072 | 86.5 |
| 2663 | 11v-03-OhfusettoPentBipyr— fe2c4— 997  | -3195.966072 | 86.5 |
| 2664 | 11v-04-Icos-1vx— fe2c4— 1455           | -3195.966054 | 86.5 |
| 2665 | 11v-04-Icos-1vx— fe2c4— 1473           | -3195.966054 | 86.5 |
| 2666 | 11v-04-Icos-1vx— fe2c4— 1527           | -3195.966054 | 86.5 |
| 2667 | 11v-03-OhfusettoPentBipyr— fe2c4— 740  | -3195.965863 | 86.6 |
| 2668 | 11v-03-OhfusettoPentBipyr— fe2c4— 763  | -3195.965863 | 86.6 |
| 2669 | 11v-04-Icos-1vx— fe2c4— 2801           | -3195.965545 | 86.8 |
| 2670 | 11v-04-Icos-1vx— fe2c4— 2819           | -3195.965527 | 86.9 |
| 2671 | 11v-03-OhfusettoPentBipyr— fe2c4— 870  | -3195.965175 | 87.1 |
| 2672 | 11v-03-OhfusettoPentBipyr— fe2c4— 915  | -3195.965174 | 87.1 |
| 2673 | 11v-03-OhfusettoPentBipyr— fe2c4— 891  | -3195.965172 | 87.1 |
| 2674 | 11v-01-PentaCapTrPr— fe2c4— 37         | -3195.965062 | 87.2 |
| 2675 | 11v-03-OhfusettoPentBipyr— fe2c4— 661  | -3195.964969 | 87.2 |
| 2676 | 11v-04-Icos-1vx— fe2c4— 2357           | -3195.964937 | 87.2 |
| 2677 | 11v-04-Icos-1vx— fe2c4— 2369           | -3195.964892 | 87.3 |
| 2678 | 11v-04-Icos-1vx— fe2c4— 2582           | -3195.964867 | 87.3 |
| 2679 | 11v-04-Icos-1vx— fe2c4— 2323           | -3195.964833 | 87.3 |
| 2680 | 11v-04-Icos-1vx— fe2c4— 2068           | -3195.964716 | 87.4 |
| 2681 | 11v-04-Icos-1vx— fe2c4— 2044           | -3195.964712 | 87.4 |
| 2682 | 11v-03-OhfusettoPentBipyr— fe2c4— 639  | -3195.964697 | 87.4 |
| 2683 | 11v-03-OhfusettoPentBipyr— fe2c4— 588  | -3195.964695 | 87.4 |
| 2684 | 11v-03-OhfusettoPentBipyr— fe2c4— 600  | -3195.964688 | 87.4 |
| 2685 | 11v-03-OhfusettoPentBipyr— fe2c4— 603  | -3195.964685 | 87.4 |
| 2686 | 11v-03-OhfusettoPentBipyr— fe2c4— 1054 | -3195.964596 | 87.4 |
| 2687 | 11v-04-Icos-1vx— fe2c4— 2324           | -3195.964594 | 87.4 |
| 2688 | 11v-04-Icos-1vx— fe2c4— 2286           | -3195.964571 | 87.5 |
| 2689 | 11v-04-Icos-1vx— fe2c4— 2310           | -3195.964558 | 87.5 |
| 2690 | 11v-04-Icos-1vx— fe2c4— 1372           | -3195.964477 | 87.5 |
| 2691 | 11v-04-Icos-1vx— fe2c4— 1384           | -3195.964477 | 87.5 |
| 2692 | 11v-04-Icos-1vx— fe2c4— 1972           | -3195.964158 | 87.7 |
| 2693 | 11v-04-Icos-1vx— fe2c4— 1651           | -3195.963961 | 87.8 |
| 2694 | 11v-04-Icos-1vx— fe2c4— 1660           | -3195.963961 | 87.8 |
| 2695 | 11v-03-OhfusettoPentBipyr— fe2c4— 779  | -3195.963769 | 88.0 |
| 2696 | 11v-02-TricapCube— fe2c4— 327          | -3195.963595 | 88.1 |
| 2697 | 11v-02-TricapCube— fe2c4— 414          | -3195.963593 | 88.1 |
| 2698 | 11v-02-TricapCube— fe2c4— 432          | -3195.963591 | 88.1 |
| 2699 | 11v-02-TricapCube— fe2c4— 369          | -3195.963589 | 88.1 |
| 2700 | 11v-03-OhfusettoPentBipyr— fe2c4— 792  | -3195.963574 | 88.1 |

|      |                           |       |      |              |      |
|------|---------------------------|-------|------|--------------|------|
| 2701 | 11v-04-Icos-1vx           | fe2c4 | 1985 | -3195.963324 | 88.2 |
| 2702 | 11v-04-Icos-1vx           | fe2c4 | 2353 | -3195.963271 | 88.3 |
| 2703 | 11v-04-Icos-1vx           | fe2c4 | 2308 | -3195.963251 | 88.3 |
| 2704 | 11v-04-Icos-1vx           | fe2c4 | 2841 | -3195.963217 | 88.3 |
| 2705 | 11v-04-Icos-1vx           | fe2c4 | 2811 | -3195.963212 | 88.3 |
| 2706 | 11v-04-Icos-1vx           | fe2c4 | 2371 | -3195.963155 | 88.3 |
| 2707 | 11v-04-Icos-1vx           | fe2c4 | 2373 | -3195.963146 | 88.4 |
| 2708 | 11v-04-Icos-1vx           | fe2c4 | 2361 | -3195.963117 | 88.4 |
| 2709 | 11v-04-Icos-1vx           | fe2c4 | 1351 | -3195.96309  | 88.4 |
| 2710 | 11v-03-OhfusettoPentBipyr | fe2c4 | 848  | -3195.963078 | 88.4 |
| 2711 | 11v-04-Icos-1vx           | fe2c4 | 2251 | -3195.962601 | 88.7 |
| 2712 | 11v-03-OhfusettoPentBipyr | fe2c4 | 543  | -3195.962568 | 88.7 |
| 2713 | 11v-03-OhfusettoPentBipyr | fe2c4 | 1019 | -3195.962469 | 88.8 |
| 2714 | 11v-04-Icos-1vx           | fe2c4 | 2055 | -3195.962445 | 88.8 |
| 2715 | 11v-04-Icos-1vx           | fe2c4 | 2074 | -3195.962443 | 88.8 |
| 2716 | 11v-04-Icos-1vx           | fe2c4 | 2096 | -3195.96229  | 88.9 |
| 2717 | 11v-04-Icos-1vx           | fe2c4 | 2244 | -3195.962168 | 89.0 |
| 2718 | 11v-04-Icos-1vx           | fe2c4 | 2250 | -3195.962147 | 89.0 |
| 2719 | 11v-04-Icos-1vx           | fe2c4 | 2268 | -3195.962134 | 89.0 |
| 2720 | 11v-03-OhfusettoPentBipyr | fe2c4 | 926  | -3195.962005 | 89.1 |
| 2721 | 11v-04-Icos-1vx           | fe2c4 | 2245 | -3195.962005 | 89.1 |
| 2722 | 11v-03-OhfusettoPentBipyr | fe2c4 | 947  | -3195.962004 | 89.1 |
| 2723 | 11v-03-OhfusettoPentBipyr | fe2c4 | 935  | -3195.961996 | 89.1 |
| 2724 | 11v-04-Icos-1vx           | fe2c4 | 2231 | -3195.961825 | 89.2 |
| 2725 | 11v-04-Icos-1vx           | fe2c4 | 2243 | -3195.961825 | 89.2 |
| 2726 | 11v-04-Icos-1vx           | fe2c4 | 2882 | -3195.961813 | 89.2 |
| 2727 | 11v-04-Icos-1vx           | fe2c4 | 2201 | -3195.961612 | 89.3 |
| 2728 | 11v-03-OhfusettoPentBipyr | fe2c4 | 878  | -3195.961605 | 89.3 |
| 2729 | 11v-04-Icos-1vx           | fe2c4 | 2235 | -3195.961282 | 89.5 |
| 2730 | 11v-04-Icos-1vx           | fe2c4 | 2080 | -3195.961252 | 89.5 |
| 2731 | 11v-04-Icos-1vx           | fe2c4 | 1427 | -3195.960582 | 90.0 |
| 2732 | 11v-04-Icos-1vx           | fe2c4 | 2198 | -3195.960521 | 90.0 |
| 2733 | 11v-04-Icos-1vx           | fe2c4 | 2216 | -3195.960504 | 90.0 |
| 2734 | 11v-04-Icos-1vx           | fe2c4 | 2847 | -3195.960471 | 90.0 |
| 2735 | 11v-04-Icos-1vx           | fe2c4 | 2863 | -3195.960471 | 90.0 |
| 2736 | 11v-04-Icos-1vx           | fe2c4 | 2852 | -3195.960466 | 90.0 |
| 2737 | 11v-03-OhfusettoPentBipyr | fe2c4 | 703  | -3195.960463 | 90.0 |
| 2738 | 11v-03-OhfusettoPentBipyr | fe2c4 | 715  | -3195.960463 | 90.0 |
| 2739 | 11v-02-TricapCube         | fe2c4 | 344  | -3195.96026  | 90.2 |
| 2740 | 11v-02-TricapCube         | fe2c4 | 381  | -3195.96026  | 90.2 |
| 2741 | 11v-04-Icos-1vx           | fe2c4 | 2348 | -3195.959986 | 90.3 |
| 2742 | 11v-02-TricapCube         | fe2c4 | 342  | -3195.959842 | 90.4 |
| 2743 | 11v-04-Icos-1vx           | fe2c4 | 1505 | -3195.959667 | 90.5 |
| 2744 | 11v-03-OhfusettoPentBipyr | fe2c4 | 1250 | -3195.959436 | 90.7 |
| 2745 | 11v-03-OhfusettoPentBipyr | fe2c4 | 1255 | -3195.959436 | 90.7 |
| 2746 | 11v-03-OhfusettoPentBipyr | fe2c4 | 831  | -3195.959214 | 90.8 |
| 2747 | 11v-02-TricapCube         | fe2c4 | 348  | -3195.959099 | 90.9 |
| 2748 | 11v-02-TricapCube         | fe2c4 | 366  | -3195.959099 | 90.9 |
| 2749 | 11v-02-TricapCube         | fe2c4 | 340  | -3195.959005 | 91.0 |
| 2750 | 11v-03-OhfusettoPentBipyr | fe2c4 | 921  | -3195.958701 | 91.1 |
| 2751 | 11v-04-Icos-1vx           | fe2c4 | 3112 | -3195.95865  | 91.2 |

|      |                                        |              |      |
|------|----------------------------------------|--------------|------|
| 2752 | 11v-04-Icos-1vx— fe2c4— 1519           | -3195.958519 | 91.3 |
| 2753 | 11v-04-Icos-1vx— fe2c4— 1555           | -3195.958519 | 91.3 |
| 2754 | 11v-04-Icos-1vx— fe2c4— 2883           | -3195.95823  | 91.4 |
| 2755 | 11v-04-Icos-1vx— fe2c4— 2874           | -3195.958209 | 91.5 |
| 2756 | 11v-03-OhfusettoPentBipyr— fe2c4— 942  | -3195.958098 | 91.5 |
| 2757 | 11v-03-OhfusettoPentBipyr— fe2c4— 954  | -3195.958077 | 91.5 |
| 2758 | 11v-03-OhfusettoPentBipyr— fe2c4— 1020 | -3195.958062 | 91.5 |
| 2759 | 11v-03-OhfusettoPentBipyr— fe2c4— 594  | -3195.957996 | 91.6 |
| 2760 | 11v-03-OhfusettoPentBipyr— fe2c4— 624  | -3195.957929 | 91.6 |
| 2761 | 11v-03-OhfusettoPentBipyr— fe2c4— 1158 | -3195.957575 | 91.9 |
| 2762 | 11v-03-OhfusettoPentBipyr— fe2c4— 1170 | -3195.957575 | 91.9 |
| 2763 | 11v-03-OhfusettoPentBipyr— fe2c4— 1212 | -3195.957575 | 91.9 |
| 2764 | 11v-03-OhfusettoPentBipyr— fe2c4— 463  | -3195.95706  | 92.2 |
| 2765 | 11v-03-OhfusettoPentBipyr— fe2c4— 529  | -3195.95706  | 92.2 |
| 2766 | 11v-03-OhfusettoPentBipyr— fe2c4— 535  | -3195.95706  | 92.2 |
| 2767 | 11v-03-OhfusettoPentBipyr— fe2c4— 890  | -3195.956995 | 92.2 |
| 2768 | 11v-03-OhfusettoPentBipyr— fe2c4— 869  | -3195.956993 | 92.2 |
| 2769 | 11v-04-Icos-1vx— fe2c4— 2110           | -3195.956976 | 92.2 |
| 2770 | 11v-04-Icos-1vx— fe2c4— 2050           | -3195.956968 | 92.2 |
| 2771 | 11v-03-OhfusettoPentBipyr— fe2c4— 898  | -3195.956688 | 92.4 |
| 2772 | 11v-04-Icos-1vx— fe2c4— 2336           | -3195.956515 | 92.5 |
| 2773 | 11v-04-Icos-1vx— fe2c4— 2836           | -3195.956451 | 92.6 |
| 2774 | 11v-04-Icos-1vx— fe2c4— 2806           | -3195.956439 | 92.6 |
| 2775 | 11v-02-TricapCube— fe2c4— 393          | -3195.956413 | 92.6 |
| 2776 | 11v-02-TricapCube— fe2c4— 326          | -3195.956409 | 92.6 |
| 2777 | 11v-02-TricapCube— fe2c4— 438          | -3195.956396 | 92.6 |
| 2778 | 11v-04-Icos-1vx— fe2c4— 2886           | -3195.956274 | 92.7 |
| 2779 | 11v-04-Icos-1vx— fe2c4— 2870           | -3195.956272 | 92.7 |
| 2780 | 11v-03-OhfusettoPentBipyr— fe2c4— 1271 | -3195.956257 | 92.7 |
| 2781 | 11v-03-OhfusettoPentBipyr— fe2c4— 1295 | -3195.956257 | 92.7 |
| 2782 | 11v-03-OhfusettoPentBipyr— fe2c4— 902  | -3195.956188 | 92.7 |
| 2783 | 11v-04-Icos-1vx— fe2c4— 2327           | -3195.95586  | 92.9 |
| 2784 | 11v-03-OhfusettoPentBipyr— fe2c4— 885  | -3195.955788 | 93.0 |
| 2785 | 11v-03-OhfusettoPentBipyr— fe2c4— 820  | -3195.955561 | 93.1 |
| 2786 | 11v-03-OhfusettoPentBipyr— fe2c4— 805  | -3195.955512 | 93.1 |
| 2787 | 11v-03-OhfusettoPentBipyr— fe2c4— 796  | -3195.955504 | 93.2 |
| 2788 | 11v-03-OhfusettoPentBipyr— fe2c4— 802  | -3195.955499 | 93.2 |
| 2789 | 11v-03-OhfusettoPentBipyr— fe2c4— 826  | -3195.955499 | 93.2 |
| 2790 | 11v-03-OhfusettoPentBipyr— fe2c4— 882  | -3195.955406 | 93.2 |
| 2791 | 11v-03-OhfusettoPentBipyr— fe2c4— 912  | -3195.955406 | 93.2 |
| 2792 | 11v-03-OhfusettoPentBipyr— fe2c4— 1285 | -3195.955284 | 93.3 |
| 2793 | 11v-03-OhfusettoPentBipyr— fe2c4— 852  | -3195.95528  | 93.3 |
| 2794 | 11v-03-OhfusettoPentBipyr— fe2c4— 1279 | -3195.955279 | 93.3 |
| 2795 | 11v-03-OhfusettoPentBipyr— fe2c4— 1298 | -3195.955273 | 93.3 |
| 2796 | 11v-03-OhfusettoPentBipyr— fe2c4— 705  | -3195.955205 | 93.3 |
| 2797 | 11v-03-OhfusettoPentBipyr— fe2c4— 728  | -3195.955197 | 93.3 |
| 2798 | 11v-03-OhfusettoPentBipyr— fe2c4— 757  | -3195.955197 | 93.3 |
| 2799 | 11v-03-OhfusettoPentBipyr— fe2c4— 1304 | -3195.95519  | 93.3 |
| 2800 | 11v-04-Icos-1vx— fe2c4— 3241           | -3195.955076 | 93.4 |
| 2801 | 11v-04-Icos-1vx— fe2c4— 3265           | -3195.955076 | 93.4 |
| 2802 | 11v-02-TricapCube— fe2c4— 360          | -3195.95497  | 93.5 |

|      |                           |       |      |              |      |
|------|---------------------------|-------|------|--------------|------|
| 2803 | 11v-03-OhfusettoPentBipyr | fe2c4 | 917  | -3195.954967 | 93.5 |
| 2804 | 11v-03-OhfusettoPentBipyr | fe2c4 | 851  | -3195.954957 | 93.5 |
| 2805 | 11v-03-OhfusettoPentBipyr | fe2c4 | 911  | -3195.954957 | 93.5 |
| 2806 | 11v-03-OhfusettoPentBipyr | fe2c4 | 840  | -3195.95487  | 93.5 |
| 2807 | 11v-03-OhfusettoPentBipyr | fe2c4 | 1055 | -3195.954528 | 93.8 |
| 2808 | 11v-03-OhfusettoPentBipyr | fe2c4 | 1262 | -3195.954408 | 93.8 |
| 2809 | 11v-03-OhfusettoPentBipyr | fe2c4 | 1248 | -3195.954267 | 93.9 |
| 2810 | 11v-03-OhfusettoPentBipyr | fe2c4 | 1260 | -3195.954267 | 93.9 |
| 2811 | 11v-03-OhfusettoPentBipyr | fe2c4 | 904  | -3195.954182 | 94.0 |
| 2812 | 11v-03-OhfusettoPentBipyr | fe2c4 | 659  | -3195.954121 | 94.0 |
| 2813 | 11v-03-OhfusettoPentBipyr | fe2c4 | 1268 | -3195.953995 | 94.1 |
| 2814 | 11v-03-OhfusettoPentBipyr | fe2c4 | 1283 | -3195.953994 | 94.1 |
| 2815 | 11v-03-OhfusettoPentBipyr | fe2c4 | 711  | -3195.953918 | 94.1 |
| 2816 | 11v-03-OhfusettoPentBipyr | fe2c4 | 724  | -3195.953911 | 94.1 |
| 2817 | 11v-04-Icos-1vx           | fe2c4 | 2859 | -3195.953808 | 94.2 |
| 2818 | 11v-04-Icos-1vx           | fe2c4 | 2805 | -3195.953801 | 94.2 |
| 2819 | 11v-03-OhfusettoPentBipyr | fe2c4 | 708  | -3195.953741 | 94.3 |
| 2820 | 11v-03-OhfusettoPentBipyr | fe2c4 | 887  | -3195.953583 | 94.4 |
| 2821 | 11v-04-Icos-1vx           | fe2c4 | 2011 | -3195.953566 | 94.4 |
| 2822 | 11v-04-Icos-1vx           | fe2c4 | 2026 | -3195.953561 | 94.4 |
| 2823 | 11v-04-Icos-1vx           | fe2c4 | 2049 | -3195.95356  | 94.4 |
| 2824 | 11v-04-Icos-1vx           | fe2c4 | 1471 | -3195.953397 | 94.5 |
| 2825 | 11v-04-Icos-1vx           | fe2c4 | 1503 | -3195.953397 | 94.5 |
| 2826 | 11v-04-Icos-1vx           | fe2c4 | 1510 | -3195.953397 | 94.5 |
| 2827 | 11v-04-Icos-1vx           | fe2c4 | 1570 | -3195.953397 | 94.5 |
| 2828 | 11v-04-Icos-1vx           | fe2c4 | 2354 | -3195.95327  | 94.6 |
| 2829 | 11v-04-Icos-1vx           | fe2c4 | 2309 | -3195.953261 | 94.6 |
| 2830 | 11v-04-Icos-1vx           | fe2c4 | 2329 | -3195.95325  | 94.6 |
| 2831 | 11v-03-OhfusettoPentBipyr | fe2c4 | 1328 | -3195.953187 | 94.6 |
| 2832 | 11v-03-OhfusettoPentBipyr | fe2c4 | 1334 | -3195.952919 | 94.8 |
| 2833 | 11v-03-OhfusettoPentBipyr | fe2c4 | 1026 | -3195.952673 | 94.9 |
| 2834 | 11v-04-Icos-1vx           | fe2c4 | 2321 | -3195.952627 | 95.0 |
| 2835 | 11v-04-Icos-1vx           | fe2c4 | 2056 | -3195.952536 | 95.0 |
| 2836 | 11v-04-Icos-1vx           | fe2c4 | 2062 | -3195.952498 | 95.0 |
| 2837 | 11v-04-Icos-1vx           | fe2c4 | 1352 | -3195.952303 | 95.2 |
| 2838 | 11v-04-Icos-1vx           | fe2c4 | 1376 | -3195.952303 | 95.2 |
| 2839 | 11v-02-TricapCube         | fe2c4 | 394  | -3195.952192 | 95.2 |
| 2840 | 11v-02-TricapCube         | fe2c4 | 400  | -3195.952161 | 95.2 |
| 2841 | 11v-02-TricapCube         | fe2c4 | 431  | -3195.952161 | 95.2 |
| 2842 | 11v-02-TricapCube         | fe2c4 | 368  | -3195.952157 | 95.3 |
| 2843 | 11v-03-OhfusettoPentBipyr | fe2c4 | 939  | -3195.952057 | 95.3 |
| 2844 | 11v-03-OhfusettoPentBipyr | fe2c4 | 979  | -3195.952052 | 95.3 |
| 2845 | 11v-03-OhfusettoPentBipyr | fe2c4 | 960  | -3195.952047 | 95.3 |
| 2846 | 11v-03-OhfusettoPentBipyr | fe2c4 | 1005 | -3195.952034 | 95.3 |
| 2847 | 11v-03-OhfusettoPentBipyr | fe2c4 | 1275 | -3195.951994 | 95.4 |
| 2848 | 11v-03-OhfusettoPentBipyr | fe2c4 | 1302 | -3195.951994 | 95.4 |
| 2849 | 11v-03-OhfusettoPentBipyr | fe2c4 | 1017 | -3195.951893 | 95.4 |
| 2850 | 11v-03-OhfusettoPentBipyr | fe2c4 | 933  | -3195.951872 | 95.4 |
| 2851 | 11v-03-OhfusettoPentBipyr | fe2c4 | 457  | -3195.951846 | 95.4 |
| 2852 | 11v-03-OhfusettoPentBipyr | fe2c4 | 526  | -3195.951836 | 95.5 |
| 2853 | 11v-03-OhfusettoPentBipyr | fe2c4 | 487  | -3195.951814 | 95.5 |

|      |                          |       |      |              |      |
|------|--------------------------|-------|------|--------------|------|
| 2854 | 11v-03-OhfusetopentBipyr | fe2c4 | 520  | -3195.951814 | 95.5 |
| 2855 | 11v-03-OhfusetopentBipyr | fe2c4 | 1309 | -3195.95176  | 95.5 |
| 2856 | 11v-03-OhfusetopentBipyr | fe2c4 | 1323 | -3195.95176  | 95.5 |
| 2857 | 11v-03-OhfusetopentBipyr | fe2c4 | 511  | -3195.951754 | 95.5 |
| 2858 | 11v-03-OhfusetopentBipyr | fe2c4 | 556  | -3195.951742 | 95.5 |
| 2859 | 11v-02-TricapCube        | fe2c4 | 357  | -3195.951653 | 95.6 |
| 2860 | 11v-02-TricapCube        | fe2c4 | 420  | -3195.951653 | 95.6 |
| 2861 | 11v-03-OhfusetopentBipyr | fe2c4 | 884  | -3195.95155  | 95.6 |
| 2862 | 11v-03-OhfusetopentBipyr | fe2c4 | 1034 | -3195.951326 | 95.8 |
| 2863 | 11v-03-OhfusetopentBipyr | fe2c4 | 1023 | -3195.951275 | 95.8 |
| 2864 | 11v-03-OhfusetopentBipyr | fe2c4 | 488  | -3195.951262 | 95.8 |
| 2865 | 11v-03-OhfusetopentBipyr | fe2c4 | 527  | -3195.951262 | 95.8 |
| 2866 | 11v-03-OhfusetopentBipyr | fe2c4 | 538  | -3195.951262 | 95.8 |
| 2867 | 11v-03-OhfusetopentBipyr | fe2c4 | 1040 | -3195.951208 | 95.8 |
| 2868 | 11v-02-TricapCube        | fe2c4 | 337  | -3195.951181 | 95.9 |
| 2869 | 11v-02-TricapCube        | fe2c4 | 383  | -3195.95111  | 95.9 |
| 2870 | 11v-02-TricapCube        | fe2c4 | 377  | -3195.951094 | 95.9 |
| 2871 | 11v-04-Icos-1vx          | fe2c4 | 2363 | -3195.950978 | 96.0 |
| 2872 | 11v-04-Icos-1vx          | fe2c4 | 2375 | -3195.950936 | 96.0 |
| 2873 | 11v-02-TricapCube        | fe2c4 | 358  | -3195.950237 | 96.5 |
| 2874 | 11v-04-Icos-1vx          | fe2c4 | 1379 | -3195.950229 | 96.5 |
| 2875 | 11v-03-OhfusetopentBipyr | fe2c4 | 1189 | -3195.949996 | 96.6 |
| 2876 | 11v-02-TricapCube        | fe2c4 | 386  | -3195.949977 | 96.6 |
| 2877 | 11v-02-TricapCube        | fe2c4 | 443  | -3195.949965 | 96.6 |
| 2878 | 11v-03-OhfusetopentBipyr | fe2c4 | 570  | -3195.94996  | 96.6 |
| 2879 | 11v-02-TricapCube        | fe2c4 | 437  | -3195.949939 | 96.6 |
| 2880 | 11v-02-TricapCube        | fe2c4 | 392  | -3195.949888 | 96.7 |
| 2881 | 11v-02-TricapCube        | fe2c4 | 345  | -3195.949494 | 96.9 |
| 2882 | 11v-02-TricapCube        | fe2c4 | 363  | -3195.949494 | 96.9 |
| 2883 | 11v-02-TricapCube        | fe2c4 | 426  | -3195.949494 | 96.9 |
| 2884 | 11v-04-Icos-1vx          | fe2c4 | 1403 | -3195.949453 | 96.9 |
| 2885 | 11v-04-Icos-1vx          | fe2c4 | 2326 | -3195.949277 | 97.1 |
| 2886 | 11v-03-OhfusetopentBipyr | fe2c4 | 573  | -3195.94918  | 97.1 |
| 2887 | 11v-04-Icos-1vx          | fe2c4 | 1361 | -3195.948826 | 97.3 |
| 2888 | 11v-04-Icos-1vx          | fe2c4 | 1404 | -3195.948821 | 97.3 |
| 2889 | 11v-03-OhfusetopentBipyr | fe2c4 | 949  | -3195.948811 | 97.4 |
| 2890 | 11v-03-OhfusetopentBipyr | fe2c4 | 566  | -3195.948567 | 97.5 |
| 2891 | 11v-02-TricapCube        | fe2c4 | 351  | -3195.948486 | 97.6 |
| 2892 | 11v-03-OhfusetopentBipyr | fe2c4 | 916  | -3195.948403 | 97.6 |
| 2893 | 11v-03-OhfusetopentBipyr | fe2c4 | 943  | -3195.948386 | 97.6 |
| 2894 | 11v-03-OhfusetopentBipyr | fe2c4 | 985  | -3195.948369 | 97.6 |
| 2895 | 11v-03-OhfusetopentBipyr | fe2c4 | 843  | -3195.948248 | 97.7 |
| 2896 | 11v-04-Icos-1vx          | fe2c4 | 2294 | -3195.948005 | 97.9 |
| 2897 | 11v-03-OhfusetopentBipyr | fe2c4 | 998  | -3195.947768 | 98.0 |
| 2898 | 11v-03-OhfusetopentBipyr | fe2c4 | 1010 | -3195.947766 | 98.0 |
| 2899 | 11v-03-OhfusetopentBipyr | fe2c4 | 1306 | -3195.947659 | 98.1 |
| 2900 | 11v-03-OhfusetopentBipyr | fe2c4 | 481  | -3195.947605 | 98.1 |
| 2901 | 11v-03-OhfusetopentBipyr | fe2c4 | 562  | -3195.947605 | 98.1 |
| 2902 | 11v-03-OhfusetopentBipyr | fe2c4 | 502  | -3195.947593 | 98.1 |
| 2903 | 11v-04-Icos-1vx          | fe2c4 | 1537 | -3195.947288 | 98.3 |
| 2904 | 11v-04-Icos-1vx          | fe2c4 | 1556 | -3195.947288 | 98.3 |

|      |                                          |              |       |
|------|------------------------------------------|--------------|-------|
| 2905 | 11v-03-OhfusettoPentBipyr — fe2c4 — 1201 | -3195.947154 | 98.4  |
| 2906 | 11v-04-Icos-1vx — fe2c4 — 2225           | -3195.947032 | 98.5  |
| 2907 | 11v-04-Icos-1vx — fe2c4 — 2207           | -3195.946953 | 98.5  |
| 2908 | 11v-04-Icos-1vx — fe2c4 — 2237           | -3195.946937 | 98.5  |
| 2909 | 11v-03-OhfusettoPentBipyr — fe2c4 — 615  | -3195.946306 | 98.9  |
| 2910 | 11v-03-OhfusettoPentBipyr — fe2c4 — 621  | -3195.946306 | 98.9  |
| 2911 | 11v-03-OhfusettoPentBipyr — fe2c4 — 655  | -3195.946306 | 98.9  |
| 2912 | 11v-03-OhfusettoPentBipyr — fe2c4 — 666  | -3195.946    | 99.1  |
| 2913 | 11v-04-Icos-1vx — fe2c4 — 2100           | -3195.945902 | 99.2  |
| 2914 | 11v-04-Icos-1vx — fe2c4 — 2083           | -3195.945895 | 99.2  |
| 2915 | 11v-04-Icos-1vx — fe2c4 — 1987           | -3195.945891 | 99.2  |
| 2916 | 11v-04-Icos-1vx — fe2c4 — 1975           | -3195.945882 | 99.2  |
| 2917 | 11v-04-Icos-1vx — fe2c4 — 2088           | -3195.945881 | 99.2  |
| 2918 | 11v-04-Icos-1vx — fe2c4 — 1504           | -3195.945852 | 99.2  |
| 2919 | 11v-04-Icos-1vx — fe2c4 — 1498           | -3195.945851 | 99.2  |
| 2920 | 11v-04-Icos-1vx — fe2c4 — 1558           | -3195.94585  | 99.2  |
| 2921 | 11v-03-OhfusettoPentBipyr — fe2c4 — 542  | -3195.945574 | 99.4  |
| 2922 | 11v-03-OhfusettoPentBipyr — fe2c4 — 548  | -3195.945558 | 99.4  |
| 2923 | 11v-02-TricapCube — fe2c4 — 376          | -3195.945524 | 99.4  |
| 2924 | 11v-03-OhfusettoPentBipyr — fe2c4 — 1033 | -3195.945452 | 99.5  |
| 2925 | 11v-03-OhfusettoPentBipyr — fe2c4 — 1004 | -3195.945451 | 99.5  |
| 2926 | 11v-03-OhfusettoPentBipyr — fe2c4 — 1016 | -3195.945451 | 99.5  |
| 2927 | 11v-04-Icos-1vx — fe2c4 — 1499           | -3195.944774 | 99.9  |
| 2928 | 11v-04-Icos-1vx — fe2c4 — 2692           | -3195.944745 | 99.9  |
| 2929 | 11v-04-Icos-1vx — fe2c4 — 2608           | -3195.944718 | 99.9  |
| 2930 | 11v-04-Icos-1vx — fe2c4 — 2614           | -3195.944712 | 99.9  |
| 2931 | 11v-02-TricapCube — fe2c4 — 352          | -3195.94462  | 100.0 |
| 2932 | 11v-04-Icos-1vx — fe2c4 — 3064           | -3195.944584 | 100.0 |
| 2933 | 11v-04-Icos-1vx — fe2c4 — 3028           | -3195.94458  | 100.0 |
| 2934 | 11v-04-Icos-1vx — fe2c4 — 3009           | -3195.944572 | 100.0 |
| 2935 | 11v-04-Icos-1vx — fe2c4 — 3013           | -3195.944572 | 100.0 |
| 2936 | 11v-04-Icos-1vx — fe2c4 — 3075           | -3195.944565 | 100.0 |
| 2937 | 11v-03-OhfusettoPentBipyr — fe2c4 — 1121 | -3195.944519 | 100.0 |
| 2938 | 11v-04-Icos-1vx — fe2c4 — 2076           | -3195.944462 | 100.1 |
| 2939 | 11v-04-Icos-1vx — fe2c4 — 2082           | -3195.944452 | 100.1 |
| 2940 | 11v-04-Icos-1vx — fe2c4 — 1986           | -3195.944427 | 100.1 |
| 2941 | 11v-04-Icos-1vx — fe2c4 — 2345           | -3195.944277 | 100.2 |
| 2942 | 11v-03-OhfusettoPentBipyr — fe2c4 — 1200 | -3195.943953 | 100.4 |
| 2943 | 11v-03-OhfusettoPentBipyr — fe2c4 — 1206 | -3195.943818 | 100.5 |
| 2944 | 11v-03-OhfusettoPentBipyr — fe2c4 — 668  | -3195.943556 | 100.6 |
| 2945 | 11v-03-OhfusettoPentBipyr — fe2c4 — 906  | -3195.943336 | 100.8 |
| 2946 | 11v-03-OhfusettoPentBipyr — fe2c4 — 810  | -3195.943263 | 100.8 |
| 2947 | 11v-04-Icos-1vx — fe2c4 — 1974           | -3195.943188 | 100.9 |
| 2948 | 11v-04-Icos-1vx — fe2c4 — 2817           | -3195.942891 | 101.1 |
| 2949 | 11v-04-Icos-1vx — fe2c4 — 2823           | -3195.942884 | 101.1 |
| 2950 | 11v-04-Icos-1vx — fe2c4 — 2808           | -3195.942878 | 101.1 |
| 2951 | 11v-03-OhfusettoPentBipyr — fe2c4 — 645  | -3195.94282  | 101.1 |
| 2952 | 11v-03-OhfusettoPentBipyr — fe2c4 — 604  | -3195.942795 | 101.1 |
| 2953 | 11v-03-OhfusettoPentBipyr — fe2c4 — 864  | -3195.942745 | 101.2 |
| 2954 | 11v-04-Icos-1vx — fe2c4 — 2518           | -3195.942671 | 101.2 |
| 2955 | 11v-03-OhfusettoPentBipyr — fe2c4 — 798  | -3195.942446 | 101.3 |

|      |                                     |              |       |
|------|-------------------------------------|--------------|-------|
| 2956 | 11v-03-OhfusetopentBipyr—fe2c4—844  | -3195.942445 | 101.3 |
| 2957 | 11v-03-OhfusetopentBipyr—fe2c4—822  | -3195.942396 | 101.4 |
| 2958 | 11v-04-Icos-1vx—fe2c4—2179          | -3195.942043 | 101.6 |
| 2959 | 11v-04-Icos-1vx—fe2c4—2161          | -3195.942039 | 101.6 |
| 2960 | 11v-04-Icos-1vx—fe2c4—2187          | -3195.942032 | 101.6 |
| 2961 | 11v-04-Icos-1vx—fe2c4—2196          | -3195.942031 | 101.6 |
| 2962 | 11v-02-TricapCube—fe2c4—339         | -3195.942024 | 101.6 |
| 2963 | 11v-04-Icos-1vx—fe2c4—2297          | -3195.94184  | 101.7 |
| 2964 | 11v-03-OhfusetopentBipyr—fe2c4—574  | -3195.941605 | 101.9 |
| 2965 | 11v-03-OhfusetopentBipyr—fe2c4—934  | -3195.941481 | 102.0 |
| 2966 | 11v-03-OhfusetopentBipyr—fe2c4—946  | -3195.941478 | 102.0 |
| 2967 | 11v-02-TricapCube—fe2c4—325         | -3195.941347 | 102.0 |
| 2968 | 11v-02-TricapCube—fe2c4—411         | -3195.941322 | 102.0 |
| 2969 | 11v-03-OhfusetopentBipyr—fe2c4—586  | -3195.94131  | 102.1 |
| 2970 | 11v-03-OhfusetopentBipyr—fe2c4—581  | -3195.941253 | 102.1 |
| 2971 | 11v-03-OhfusetopentBipyr—fe2c4—584  | -3195.941253 | 102.1 |
| 2972 | 11v-02-TricapCube—fe2c4—429         | -3195.941213 | 102.1 |
| 2973 | 11v-04-Icos-1vx—fe2c4—2291          | -3195.941121 | 102.2 |
| 2974 | 11v-03-OhfusetopentBipyr—fe2c4—952  | -3195.941079 | 102.2 |
| 2975 | 11v-03-OhfusetopentBipyr—fe2c4—925  | -3195.941077 | 102.2 |
| 2976 | 11v-04-Icos-1vx—fe2c4—2350          | -3195.940825 | 102.4 |
| 2977 | 11v-04-Icos-1vx—fe2c4—2332          | -3195.940809 | 102.4 |
| 2978 | 11v-04-Icos-1vx—fe2c4—1366          | -3195.939615 | 103.1 |
| 2979 | 11v-04-Icos-1vx—fe2c4—1397          | -3195.939555 | 103.2 |
| 2980 | 11v-03-OhfusetopentBipyr—fe2c4—940  | -3195.939544 | 103.2 |
| 2981 | 11v-02-TricapCube—fe2c4—334         | -3195.939233 | 103.4 |
| 2982 | 11v-03-OhfusetopentBipyr—fe2c4—649  | -3195.93895  | 103.5 |
| 2983 | 11v-03-OhfusetopentBipyr—fe2c4—577  | -3195.938949 | 103.5 |
| 2984 | 11v-03-OhfusetopentBipyr—fe2c4—589  | -3195.938949 | 103.5 |
| 2985 | 11v-03-OhfusetopentBipyr—fe2c4—613  | -3195.938949 | 103.5 |
| 2986 | 11v-03-OhfusetopentBipyr—fe2c4—619  | -3195.938949 | 103.5 |
| 2987 | 11v-02-TricapCube—fe2c4—398         | -3195.938602 | 103.8 |
| 2988 | 11v-02-TricapCube—fe2c4—329         | -3195.937916 | 104.2 |
| 2989 | 11v-02-TricapCube—fe2c4—384         | -3195.937916 | 104.2 |
| 2990 | 11v-02-TricapCube—fe2c4—354         | -3195.937826 | 104.2 |
| 2991 | 11v-03-OhfusetopentBipyr—fe2c4—528  | -3195.937767 | 104.3 |
| 2992 | 11v-03-OhfusetopentBipyr—fe2c4—489  | -3195.937439 | 104.5 |
| 2993 | 11v-03-OhfusetopentBipyr—fe2c4—1273 | -3195.937081 | 104.7 |
| 2994 | 11v-03-OhfusetopentBipyr—fe2c4—1300 | -3195.937081 | 104.7 |
| 2995 | 11v-03-OhfusetopentBipyr—fe2c4—850  | -3195.936833 | 104.9 |
| 2996 | 11v-03-OhfusetopentBipyr—fe2c4—910  | -3195.936826 | 104.9 |
| 2997 | 11v-03-OhfusetopentBipyr—fe2c4—875  | -3195.936614 | 105.0 |
| 2998 | 11v-03-OhfusetopentBipyr—fe2c4—662  | -3195.936446 | 105.1 |
| 2999 | 11v-04-Icos-1vx—fe2c4—2685          | -3195.936274 | 105.2 |
| 3000 | 11v-04-Icos-1vx—fe2c4—2697          | -3195.936271 | 105.2 |
| 3001 | 11v-04-Icos-1vx—fe2c4—2715          | -3195.936266 | 105.2 |
| 3002 | 11v-03-OhfusetopentBipyr—fe2c4—814  | -3195.93626  | 105.2 |
| 3003 | 11v-03-OhfusetopentBipyr—fe2c4—823  | -3195.93626  | 105.2 |
| 3004 | 11v-03-OhfusetopentBipyr—fe2c4—889  | -3195.93626  | 105.2 |
| 3005 | 11v-03-OhfusetopentBipyr—fe2c4—817  | -3195.936259 | 105.2 |
| 3006 | 11v-03-OhfusetopentBipyr—fe2c4—856  | -3195.936259 | 105.2 |

|      |                                          |              |       |
|------|------------------------------------------|--------------|-------|
| 3007 | 11v-03-OhfusettoPentBipyr — fe2c4 — 868  | -3195.936246 | 105.2 |
| 3008 | 11v-04-Icos-1vx — fe2c4 — 1979           | -3195.936178 | 105.3 |
| 3009 | 11v-03-OhfusettoPentBipyr — fe2c4 — 484  | -3195.935958 | 105.4 |
| 3010 | 11v-03-OhfusettoPentBipyr — fe2c4 — 550  | -3195.935958 | 105.4 |
| 3011 | 11v-04-Icos-1vx — fe2c4 — 2180           | -3195.935761 | 105.5 |
| 3012 | 11v-04-Icos-1vx — fe2c4 — 2232           | -3195.9356   | 105.6 |
| 3013 | 11v-04-Icos-1vx — fe2c4 — 2162           | -3195.935592 | 105.6 |
| 3014 | 11v-04-Icos-1vx — fe2c4 — 2104           | -3195.935341 | 105.8 |
| 3015 | 11v-04-Icos-1vx — fe2c4 — 2002           | -3195.935334 | 105.8 |
| 3016 | 11v-04-Icos-1vx — fe2c4 — 2014           | -3195.935334 | 105.8 |
| 3017 | 11v-04-Icos-1vx — fe2c4 — 2098           | -3195.93532  | 105.8 |
| 3018 | 11v-04-Icos-1vx — fe2c4 — 2103           | -3195.935186 | 105.9 |
| 3019 | 11v-02-TricapCube — fe2c4 — 335          | -3195.934942 | 106.1 |
| 3020 | 11v-03-OhfusettoPentBipyr — fe2c4 — 461  | -3195.934798 | 106.1 |
| 3021 | 11v-03-OhfusettoPentBipyr — fe2c4 — 1177 | -3195.934735 | 106.2 |
| 3022 | 11v-03-OhfusettoPentBipyr — fe2c4 — 956  | -3195.934612 | 106.3 |
| 3023 | 11v-03-OhfusettoPentBipyr — fe2c4 — 446  | -3195.934321 | 106.4 |
| 3024 | 11v-03-OhfusettoPentBipyr — fe2c4 — 455  | -3195.934305 | 106.5 |
| 3025 | 11v-04-Icos-1vx — fe2c4 — 2097           | -3195.934267 | 106.5 |
| 3026 | 11v-04-Icos-1vx — fe2c4 — 2005           | -3195.934247 | 106.5 |
| 3027 | 11v-04-Icos-1vx — fe2c4 — 2013           | -3195.934247 | 106.5 |
| 3028 | 11v-03-OhfusettoPentBipyr — fe2c4 — 448  | -3195.934152 | 106.5 |
| 3029 | 11v-04-Icos-1vx — fe2c4 — 2092           | -3195.93389  | 106.7 |
| 3030 | 11v-04-Icos-1vx — fe2c4 — 2020           | -3195.93387  | 106.7 |
| 3031 | 11v-04-Icos-1vx — fe2c4 — 2362           | -3195.933675 | 106.8 |
| 3032 | 11v-03-OhfusettoPentBipyr — fe2c4 — 1186 | -3195.933323 | 107.1 |
| 3033 | 11v-03-OhfusettoPentBipyr — fe2c4 — 1222 | -3195.933323 | 107.1 |
| 3034 | 11v-03-OhfusettoPentBipyr — fe2c4 — 1348 | -3195.933314 | 107.1 |
| 3035 | 11v-03-OhfusettoPentBipyr — fe2c4 — 772  | -3195.933173 | 107.2 |
| 3036 | 11v-03-OhfusettoPentBipyr — fe2c4 — 609  | -3195.933104 | 107.2 |
| 3037 | 11v-03-OhfusettoPentBipyr — fe2c4 — 640  | -3195.933104 | 107.2 |
| 3038 | 11v-03-OhfusettoPentBipyr — fe2c4 — 646  | -3195.933104 | 107.2 |
| 3039 | 11v-03-OhfusettoPentBipyr — fe2c4 — 1308 | -3195.932729 | 107.4 |
| 3040 | 11v-03-OhfusettoPentBipyr — fe2c4 — 928  | -3195.93249  | 107.6 |
| 3041 | 11v-01-PentaCapTrPr — fe2c4 — 179        | -3195.931649 | 108.1 |
| 3042 | 11v-04-Icos-1vx — fe2c4 — 2107           | -3195.93142  | 108.3 |
| 3043 | 11v-04-Icos-1vx — fe2c4 — 2032           | -3195.931396 | 108.3 |
| 3044 | 11v-03-OhfusettoPentBipyr — fe2c4 — 598  | -3195.931262 | 108.4 |
| 3045 | 11v-03-OhfusettoPentBipyr — fe2c4 — 637  | -3195.931262 | 108.4 |
| 3046 | 11v-04-Icos-1vx — fe2c4 — 2867           | -3195.930515 | 108.8 |
| 3047 | 11v-04-Icos-1vx — fe2c4 — 2813           | -3195.930511 | 108.8 |
| 3048 | 11v-03-OhfusettoPentBipyr — fe2c4 — 994  | -3195.930154 | 109.1 |
| 3049 | 11v-04-Icos-1vx — fe2c4 — 3065           | -3195.930088 | 109.1 |
| 3050 | 11v-04-Icos-1vx — fe2c4 — 3014           | -3195.930069 | 109.1 |
| 3051 | 11v-04-Icos-1vx — fe2c4 — 3021           | -3195.929573 | 109.4 |
| 3052 | 11v-04-Icos-1vx — fe2c4 — 3015           | -3195.929562 | 109.4 |
| 3053 | 11v-04-Icos-1vx — fe2c4 — 3087           | -3195.929562 | 109.4 |
| 3054 | 11v-04-Icos-1vx — fe2c4 — 2008           | -3195.929475 | 109.5 |
| 3055 | 11v-02-TricapCube — fe2c4 — 338          | -3195.929302 | 109.6 |
| 3056 | 11v-03-OhfusettoPentBipyr — fe2c4 — 1036 | -3195.929177 | 109.7 |
| 3057 | 11v-03-OhfusettoPentBipyr — fe2c4 — 449  | -3195.929149 | 109.7 |



|      |                                          |              |       |
|------|------------------------------------------|--------------|-------|
| 3058 | 11v-03-OhfusettoPentBipyr — fe2c4 — 1264 | -3195.928997 | 109.8 |
| 3059 | 11v-04-Icos-1vx — fe2c4 — 2809           | -3195.928831 | 109.9 |
| 3060 | 11v-04-Icos-1vx — fe2c4 — 2861           | -3195.928715 | 110.0 |
| 3061 | 11v-04-Icos-1vx — fe2c4 — 2853           | -3195.928629 | 110.0 |
| 3062 | 11v-03-OhfusettoPentBipyr — fe2c4 — 880  | -3195.928391 | 110.2 |
| 3063 | 11v-03-OhfusettoPentBipyr — fe2c4 — 909  | -3195.928385 | 110.2 |
| 3064 | 11v-02-TricapCube — fe2c4 — 343          | -3195.928145 | 110.3 |
| 3065 | 11v-02-TricapCube — fe2c4 — 409          | -3195.928145 | 110.3 |
| 3066 | 11v-02-TricapCube — fe2c4 — 423          | -3195.928145 | 110.3 |
| 3067 | 11v-03-OhfusettoPentBipyr — fe2c4 — 1277 | -3195.92756  | 110.7 |
| 3068 | 11v-03-OhfusettoPentBipyr — fe2c4 — 1289 | -3195.92756  | 110.7 |
| 3069 | 11v-04-Icos-1vx — fe2c4 — 1401           | -3195.927529 | 110.7 |
| 3070 | 11v-04-Icos-1vx — fe2c4 — 1364           | -3195.927519 | 110.7 |
| 3071 | 11v-04-Icos-1vx — fe2c4 — 1402           | -3195.927515 | 110.7 |
| 3072 | 11v-03-OhfusettoPentBipyr — fe2c4 — 1307 | -3195.927383 | 110.8 |
| 3073 | 11v-04-Icos-1vx — fe2c4 — 1965           | -3195.92724  | 110.9 |
| 3074 | 11v-04-Icos-1vx — fe2c4 — 1901           | -3195.927239 | 110.9 |
| 3075 | 11v-04-Icos-1vx — fe2c4 — 1904           | -3195.927234 | 110.9 |
| 3076 | 11v-04-Icos-1vx — fe2c4 — 1922           | -3195.927216 | 110.9 |
| 3077 | 11v-03-OhfusettoPentBipyr — fe2c4 — 602  | -3195.927103 | 111.0 |
| 3078 | 11v-03-OhfusettoPentBipyr — fe2c4 — 618  | -3195.927103 | 111.0 |
| 3079 | 11v-03-OhfusettoPentBipyr — fe2c4 — 627  | -3195.927103 | 111.0 |
| 3080 | 11v-03-OhfusettoPentBipyr — fe2c4 — 657  | -3195.927103 | 111.0 |
| 3081 | 11v-03-OhfusettoPentBipyr — fe2c4 — 860  | -3195.92706  | 111.0 |
| 3082 | 11v-03-OhfusettoPentBipyr — fe2c4 — 907  | -3195.92706  | 111.0 |
| 3083 | 11v-04-Icos-1vx — fe2c4 — 1398           | -3195.926858 | 111.1 |
| 3084 | 11v-04-Icos-1vx — fe2c4 — 3073           | -3195.926299 | 111.5 |
| 3085 | 11v-04-Icos-1vx — fe2c4 — 3058           | -3195.926296 | 111.5 |
| 3086 | 11v-04-Icos-1vx — fe2c4 — 3070           | -3195.92629  | 111.5 |
| 3087 | 11v-02-TricapCube — fe2c4 — 412          | -3195.925937 | 111.7 |
| 3088 | 11v-03-OhfusettoPentBipyr — fe2c4 — 501  | -3195.925246 | 112.1 |
| 3089 | 11v-03-OhfusettoPentBipyr — fe2c4 — 561  | -3195.925246 | 112.1 |
| 3090 | 11v-02-TricapCube — fe2c4 — 356          | -3195.925069 | 112.2 |
| 3091 | 11v-03-OhfusettoPentBipyr — fe2c4 — 808  | -3195.925031 | 112.3 |
| 3092 | 11v-03-OhfusettoPentBipyr — fe2c4 — 1232 | -3195.924445 | 112.6 |
| 3093 | 11v-03-OhfusettoPentBipyr — fe2c4 — 596  | -3195.924134 | 112.8 |
| 3094 | 11v-03-OhfusettoPentBipyr — fe2c4 — 672  | -3195.924021 | 112.9 |
| 3095 | 11v-03-OhfusettoPentBipyr — fe2c4 — 643  | -3195.923959 | 112.9 |
| 3096 | 11v-03-OhfusettoPentBipyr — fe2c4 — 726  | -3195.923874 | 113.0 |
| 3097 | 11v-03-OhfusettoPentBipyr — fe2c4 — 714  | -3195.923775 | 113.1 |
| 3098 | 11v-03-OhfusettoPentBipyr — fe2c4 — 762  | -3195.923768 | 113.1 |
| 3099 | 11v-03-OhfusettoPentBipyr — fe2c4 — 1006 | -3195.923168 | 113.4 |
| 3100 | 11v-03-OhfusettoPentBipyr — fe2c4 — 1018 | -3195.923168 | 113.4 |
| 3101 | 11v-03-OhfusettoPentBipyr — fe2c4 — 945  | -3195.923168 | 113.4 |
| 3102 | 11v-03-OhfusettoPentBipyr — fe2c4 — 951  | -3195.923168 | 113.4 |
| 3103 | 11v-03-OhfusettoPentBipyr — fe2c4 — 991  | -3195.923168 | 113.4 |
| 3104 | 11v-02-TricapCube — fe2c4 — 350          | -3195.922943 | 113.6 |
| 3105 | 11v-04-Icos-1vx — fe2c4 — 2189           | -3195.922388 | 113.9 |
| 3106 | 11v-04-Icos-1vx — fe2c4 — 2320           | -3195.922151 | 114.1 |
| 3107 | 11v-04-Icos-1vx — fe2c4 — 2347           | -3195.922088 | 114.1 |
| 3108 | 11v-02-TricapCube — fe2c4 — 407          | -3195.921945 | 114.2 |

|      |                                          |              |       |
|------|------------------------------------------|--------------|-------|
| 3109 | 11v-02-TricapCube — fe2c4 — 330          | -3195.921428 | 114.5 |
| 3110 | 11v-02-TricapCube — fe2c4 — 372          | -3195.921427 | 114.5 |
| 3111 | 11v-02-TricapCube — fe2c4 — 390          | -3195.921426 | 114.5 |
| 3112 | 11v-02-TricapCube — fe2c4 — 336          | -3195.921424 | 114.5 |
| 3113 | 11v-03-OhfusettoPentBipyr — fe2c4 — 888  | -3195.921308 | 114.6 |
| 3114 | 11v-03-OhfusettoPentBipyr — fe2c4 — 1039 | -3195.921199 | 114.7 |
| 3115 | 11v-03-OhfusettoPentBipyr — fe2c4 — 969  | -3195.921199 | 114.7 |
| 3116 | 11v-03-OhfusettoPentBipyr — fe2c4 — 950  | -3195.921084 | 114.7 |
| 3117 | 11v-03-OhfusettoPentBipyr — fe2c4 — 944  | -3195.921079 | 114.8 |
| 3118 | 11v-03-OhfusettoPentBipyr — fe2c4 — 963  | -3195.920899 | 114.9 |
| 3119 | 11v-04-Icos-1vx — fe2c4 — 2186           | -3195.920884 | 114.9 |
| 3120 | 11v-04-Icos-1vx — fe2c4 — 2178           | -3195.920883 | 114.9 |
| 3121 | 11v-04-Icos-1vx — fe2c4 — 2214           | -3195.92088  | 114.9 |
| 3122 | 11v-04-Icos-1vx — fe2c4 — 2160           | -3195.920879 | 114.9 |
| 3123 | 11v-03-OhfusettoPentBipyr — fe2c4 — 575  | -3195.920849 | 114.9 |
| 3124 | 11v-02-TricapCube — fe2c4 — 415          | -3195.920683 | 115.0 |
| 3125 | 11v-02-TricapCube — fe2c4 — 349          | -3195.920644 | 115.0 |
| 3126 | 11v-03-OhfusettoPentBipyr — fe2c4 — 953  | -3195.92051  | 115.1 |
| 3127 | 11v-03-OhfusettoPentBipyr — fe2c4 — 941  | -3195.920486 | 115.1 |
| 3128 | 11v-04-Icos-1vx — fe2c4 — 1400           | -3195.920094 | 115.4 |
| 3129 | 11v-03-OhfusettoPentBipyr — fe2c4 — 1051 | -3195.91869  | 116.3 |
| 3130 | 11v-04-Icos-1vx — fe2c4 — 2343           | -3195.918666 | 116.3 |
| 3131 | 11v-04-Icos-1vx — fe2c4 — 2372           | -3195.918529 | 116.4 |
| 3132 | 11v-02-TricapCube — fe2c4 — 355          | -3195.91819  | 116.6 |
| 3133 | 11v-02-TricapCube — fe2c4 — 417          | -3195.91819  | 116.6 |
| 3134 | 11v-02-TricapCube — fe2c4 — 416          | -3195.918185 | 116.6 |
| 3135 | 11v-04-Icos-1vx — fe2c4 — 2821           | -3195.918185 | 116.6 |
| 3136 | 11v-03-OhfusettoPentBipyr — fe2c4 — 1056 | -3195.918129 | 116.6 |
| 3137 | 11v-03-OhfusettoPentBipyr — fe2c4 — 829  | -3195.917151 | 117.2 |
| 3138 | 11v-04-Icos-1vx — fe2c4 — 2063           | -3195.916873 | 117.4 |
| 3139 | 11v-04-Icos-1vx — fe2c4 — 2003           | -3195.916869 | 117.4 |
| 3140 | 11v-04-Icos-1vx — fe2c4 — 2105           | -3195.916856 | 117.4 |
| 3141 | 11v-03-OhfusettoPentBipyr — fe2c4 — 1299 | -3195.916502 | 117.6 |
| 3142 | 11v-03-OhfusettoPentBipyr — fe2c4 — 1333 | -3195.916458 | 117.7 |
| 3143 | 11v-03-OhfusettoPentBipyr — fe2c4 — 865  | -3195.915881 | 118.0 |
| 3144 | 11v-03-OhfusettoPentBipyr — fe2c4 — 811  | -3195.91588  | 118.0 |
| 3145 | 11v-03-OhfusettoPentBipyr — fe2c4 — 853  | -3195.915875 | 118.0 |
| 3146 | 11v-03-OhfusettoPentBipyr — fe2c4 — 895  | -3195.915872 | 118.0 |
| 3147 | 11v-04-Icos-1vx — fe2c4 — 1868           | -3195.915224 | 118.4 |
| 3148 | 11v-03-OhfusettoPentBipyr — fe2c4 — 1350 | -3195.915015 | 118.6 |
| 3149 | 11v-03-OhfusettoPentBipyr — fe2c4 — 1157 | -3195.914249 | 119.0 |
| 3150 | 11v-04-Icos-1vx — fe2c4 — 2302           | -3195.913819 | 119.3 |
| 3151 | 11v-04-Icos-1vx — fe2c4 — 2374           | -3195.913722 | 119.4 |
| 3152 | 11v-02-TricapCube — fe2c4 — 396          | -3195.913578 | 119.5 |
| 3153 | 11v-02-TricapCube — fe2c4 — 402          | -3195.913578 | 119.5 |
| 3154 | 11v-03-OhfusettoPentBipyr — fe2c4 — 578  | -3195.913082 | 119.8 |
| 3155 | 11v-03-OhfusettoPentBipyr — fe2c4 — 590  | -3195.913082 | 119.8 |
| 3156 | 11v-02-TricapCube — fe2c4 — 328          | -3195.912785 | 120.0 |
| 3157 | 11v-02-TricapCube — fe2c4 — 333          | -3195.912785 | 120.0 |
| 3158 | 11v-02-TricapCube — fe2c4 — 387          | -3195.912785 | 120.0 |
| 3159 | 11v-02-TricapCube — fe2c4 — 444          | -3195.912785 | 120.0 |

|      |                                          |              |       |
|------|------------------------------------------|--------------|-------|
| 3160 | 11v-03-OhfusettoPentBipyr — fe2c4 — 607  | -3195.912699 | 120.0 |
| 3161 | 11v-04-Icos-1vx — fe2c4 — 1399           | -3195.912333 | 120.2 |
| 3162 | 11v-02-TricapCube — fe2c4 — 419          | -3195.912137 | 120.4 |
| 3163 | 11v-03-OhfusettoPentBipyr — fe2c4 — 1038 | -3195.911323 | 120.9 |
| 3164 | 11v-03-OhfusettoPentBipyr — fe2c4 — 930  | -3195.911323 | 120.9 |
| 3165 | 11v-03-OhfusettoPentBipyr — fe2c4 — 984  | -3195.911323 | 120.9 |
| 3166 | 11v-03-OhfusettoPentBipyr — fe2c4 — 996  | -3195.911323 | 120.9 |
| 3167 | 11v-02-TricapCube — fe2c4 — 418          | -3195.910633 | 121.3 |
| 3168 | 11v-03-OhfusettoPentBipyr — fe2c4 — 959  | -3195.910431 | 121.4 |
| 3169 | 11v-03-OhfusettoPentBipyr — fe2c4 — 938  | -3195.910382 | 121.5 |
| 3170 | 11v-03-OhfusettoPentBipyr — fe2c4 — 932  | -3195.910377 | 121.5 |
| 3171 | 11v-03-OhfusettoPentBipyr — fe2c4 — 490  | -3195.910342 | 121.5 |
| 3172 | 11v-03-OhfusettoPentBipyr — fe2c4 — 478  | -3195.91034  | 121.5 |
| 3173 | 11v-03-OhfusettoPentBipyr — fe2c4 — 1237 | -3195.909223 | 122.2 |
| 3174 | 11v-03-OhfusettoPentBipyr — fe2c4 — 824  | -3195.90875  | 122.5 |
| 3175 | 11v-03-OhfusettoPentBipyr — fe2c4 — 631  | -3195.908016 | 122.9 |
| 3176 | 11v-03-OhfusettoPentBipyr — fe2c4 — 614  | -3195.907856 | 123.1 |
| 3177 | 11v-03-OhfusettoPentBipyr — fe2c4 — 620  | -3195.907856 | 123.1 |
| 3178 | 11v-03-OhfusettoPentBipyr — fe2c4 — 797  | -3195.907556 | 123.2 |
| 3179 | 11v-03-OhfusettoPentBipyr — fe2c4 — 821  | -3195.907556 | 123.2 |
| 3180 | 11v-03-OhfusettoPentBipyr — fe2c4 — 629  | -3195.907479 | 123.3 |
| 3181 | 11v-03-OhfusettoPentBipyr — fe2c4 — 635  | -3195.907424 | 123.3 |
| 3182 | 11v-03-OhfusettoPentBipyr — fe2c4 — 653  | -3195.907424 | 123.3 |
| 3183 | 11v-02-TricapCube — fe2c4 — 380          | -3195.906515 | 123.9 |
| 3184 | 11v-03-OhfusettoPentBipyr — fe2c4 — 1024 | -3195.906223 | 124.1 |
| 3185 | 11v-03-OhfusettoPentBipyr — fe2c4 — 965  | -3195.906223 | 124.1 |
| 3186 | 11v-02-TricapCube — fe2c4 — 346          | -3195.905871 | 124.3 |
| 3187 | 11v-02-TricapCube — fe2c4 — 353          | -3195.905836 | 124.3 |
| 3188 | 11v-03-OhfusettoPentBipyr — fe2c4 — 450  | -3195.90563  | 124.4 |
| 3189 | 11v-03-OhfusettoPentBipyr — fe2c4 — 498  | -3195.90563  | 124.4 |
| 3190 | 11v-02-TricapCube — fe2c4 — 341          | -3195.905416 | 124.6 |
| 3191 | 11v-02-TricapCube — fe2c4 — 378          | -3195.904244 | 125.3 |
| 3192 | 11v-03-OhfusettoPentBipyr — fe2c4 — 1213 | -3195.904191 | 125.4 |
| 3193 | 11v-02-TricapCube — fe2c4 — 379          | -3195.902628 | 126.3 |
| 3194 | 11v-02-TricapCube — fe2c4 — 439          | -3195.902628 | 126.3 |
| 3195 | 11v-02-TricapCube — fe2c4 — 365          | -3195.90255  | 126.4 |
| 3196 | 11v-02-TricapCube — fe2c4 — 395          | -3195.90255  | 126.4 |
| 3197 | 11v-02-TricapCube — fe2c4 — 401          | -3195.90255  | 126.4 |
| 3198 | 11v-02-TricapCube — fe2c4 — 375          | -3195.902126 | 126.6 |
| 3199 | 11v-03-OhfusettoPentBipyr — fe2c4 — 1007 | -3195.901584 | 127.0 |
| 3200 | 11v-03-OhfusettoPentBipyr — fe2c4 — 1042 | -3195.901584 | 127.0 |
| 3201 | 11v-03-OhfusettoPentBipyr — fe2c4 — 992  | -3195.901584 | 127.0 |
| 3202 | 11v-03-OhfusettoPentBipyr — fe2c4 — 1193 | -3195.901145 | 127.3 |
| 3203 | 11v-03-OhfusettoPentBipyr — fe2c4 — 832  | -3195.900776 | 127.5 |
| 3204 | 11v-03-OhfusettoPentBipyr — fe2c4 — 818  | -3195.900643 | 127.6 |
| 3205 | 11v-03-OhfusettoPentBipyr — fe2c4 — 815  | -3195.900633 | 127.6 |
| 3206 | 11v-03-OhfusettoPentBipyr — fe2c4 — 630  | -3195.900429 | 127.7 |
| 3207 | 11v-03-OhfusettoPentBipyr — fe2c4 — 660  | -3195.900429 | 127.7 |
| 3208 | 11v-03-OhfusettoPentBipyr — fe2c4 — 908  | -3195.899107 | 128.5 |
| 3209 | 11v-03-OhfusettoPentBipyr — fe2c4 — 610  | -3195.896707 | 130.0 |
| 3210 | 11v-03-OhfusettoPentBipyr — fe2c4 — 842  | -3195.896006 | 130.5 |

|      |                                      |              |       |
|------|--------------------------------------|--------------|-------|
| 3211 | 11v-03-OhfusetopentBipyrr—fe2c4—506  | -3195.895942 | 130.5 |
| 3212 | 11v-03-OhfusetopentBipyrr—fe2c4—896  | -3195.895898 | 130.6 |
| 3213 | 11v-03-OhfusetopentBipyrr—fe2c4—835  | -3195.895056 | 131.1 |
| 3214 | 11v-03-OhfusetopentBipyrr—fe2c4—962  | -3195.893668 | 132.0 |
| 3215 | 11v-03-OhfusetopentBipyrr—fe2c4—968  | -3195.893652 | 132.0 |
| 3216 | 11v-03-OhfusetopentBipyrr—fe2c4—606  | -3195.890966 | 133.6 |
| 3217 | 11v-03-OhfusetopentBipyrr—fe2c4—612  | -3195.890966 | 133.6 |
| 3218 | 11v-03-OhfusetopentBipyrr—fe2c4—642  | -3195.890966 | 133.6 |
| 3219 | 11v-03-OhfusetopentBipyrr—fe2c4—648  | -3195.890966 | 133.6 |
| 3220 | 11v-03-OhfusetopentBipyrr—fe2c4—467  | -3195.890825 | 133.7 |
| 3221 | 11v-03-OhfusetopentBipyrr—fe2c4—508  | -3195.890825 | 133.7 |
| 3222 | 11v-03-OhfusetopentBipyrr—fe2c4—1022 | -3195.889385 | 134.6 |
| 3223 | 11v-02-TricapCube—fe2c4—391          | -3195.883587 | 138.3 |
| 3224 | 11v-02-TricapCube—fe2c4—436          | -3195.883583 | 138.3 |
| 3225 | 11v-02-TricapCube—fe2c4—406          | -3195.883577 | 138.3 |
| 3226 | 11v-03-OhfusetopentBipyrr—fe2c4—1316 | -3195.883302 | 138.5 |
| 3227 | 11v-03-OhfusetopentBipyrr—fe2c4—1325 | -3195.883302 | 138.5 |
| 3228 | 11v-03-OhfusetopentBipyrr—fe2c4—1336 | -3195.883302 | 138.5 |
| 3229 | 11v-02-TricapCube—fe2c4—427          | -3195.882798 | 138.8 |
| 3230 | 11v-02-TricapCube—fe2c4—361          | -3195.882787 | 138.8 |
| 3231 | 11v-02-TricapCube—fe2c4—424          | -3195.882771 | 138.8 |
| 3232 | 11v-04-Icos-1vx—fe2c4—2287           | -3195.882471 | 139.0 |
| 3233 | 11v-03-OhfusetopentBipyrr—fe2c4—544  | -3195.882426 | 139.0 |
| 3234 | 11v-03-OhfusetopentBipyrr—fe2c4—503  | -3195.882413 | 139.0 |
| 3235 | 11v-03-OhfusetopentBipyrr—fe2c4—482  | -3195.882377 | 139.0 |
| 3236 | 11v-03-OhfusetopentBipyrr—fe2c4—1098 | -3195.880458 | 140.2 |
| 3237 | 11v-03-OhfusetopentBipyrr—fe2c4—1122 | -3195.880457 | 140.2 |
| 3238 | 11v-03-OhfusetopentBipyrr—fe2c4—1062 | -3195.880429 | 140.3 |
| 3239 | 11v-03-OhfusetopentBipyrr—fe2c4—1074 | -3195.880221 | 140.4 |
| 3240 | 11v-03-OhfusetopentBipyrr—fe2c4—1231 | -3195.879585 | 140.8 |
| 3241 | 11v-03-OhfusetopentBipyrr—fe2c4—1219 | -3195.879543 | 140.8 |
| 3242 | 11v-03-OhfusetopentBipyrr—fe2c4—1183 | -3195.879535 | 140.8 |
| 3243 | 11v-03-OhfusetopentBipyrr—fe2c4—1225 | -3195.879525 | 140.8 |
| 3244 | 11v-03-OhfusetopentBipyrr—fe2c4—537  | -3195.87947  | 140.9 |
| 3245 | 11v-03-OhfusetopentBipyrr—fe2c4—1265 | -3195.876507 | 142.7 |
| 3246 | 11v-03-OhfusetopentBipyrr—fe2c4—1249 | -3195.875798 | 143.2 |
| 3247 | 11v-03-OhfusetopentBipyrr—fe2c4—1261 | -3195.875797 | 143.2 |
| 3248 | 11v-03-OhfusetopentBipyrr—fe2c4—1044 | -3195.874716 | 143.8 |
| 3249 | 11v-03-OhfusetopentBipyrr—fe2c4—1314 | -3195.872515 | 145.2 |
| 3250 | 11v-03-OhfusetopentBipyrr—fe2c4—1320 | -3195.872515 | 145.2 |
| 3251 | 11v-03-OhfusetopentBipyrr—fe2c4—1272 | -3195.872437 | 145.3 |
| 3252 | 11v-03-OhfusetopentBipyrr—fe2c4—1296 | -3195.872437 | 145.3 |
| 3253 | 11v-03-OhfusetopentBipyrr—fe2c4—1053 | -3195.872137 | 145.5 |
| 3254 | 11v-03-OhfusetopentBipyrr—fe2c4—1337 | -3195.871771 | 145.7 |
| 3255 | 11v-03-OhfusetopentBipyrr—fe2c4—1343 | -3195.871771 | 145.7 |
| 3256 | 11v-02-TricapCube—fe2c4—347          | -3195.864471 | 150.3 |
| 3257 | 11v-03-OhfusetopentBipyrr—fe2c4—608  | -3195.863221 | 151.1 |
| 3258 | 11v-03-OhfusetopentBipyrr—fe2c4—632  | -3195.863213 | 151.1 |
| 3259 | 11v-03-OhfusetopentBipyrr—fe2c4—833  | -3195.844364 | 162.9 |
| 3260 | 11v-03-OhfusetopentBipyrr—fe2c4—836  | -3195.844363 | 162.9 |
| 3261 | 11v-03-OhfusetopentBipyrr—fe2c4—886  | -3195.844363 | 162.9 |

|      |                                     |              |       |
|------|-------------------------------------|--------------|-------|
| 3262 | 11v-03-OhfusettoPentBipyr—fe2c4—611 | -3195.843421 | 163.5 |
|------|-------------------------------------|--------------|-------|

Table S3A: Distance table for the lowest-lying  $\text{Cp}_2\text{Fe}_2\text{C}_4\text{B}_6\text{H}_{10}$  optimized structures obtained at the PBE0/def2-TZVP level of theory. Included are the zero-point corrected absolute energies in (a.u.), relative energies in (kcal/mol), symmetry and wiberg bond indecies. The cyclopentadienyl ligands and hydrogens are omitted for clarity.

|                                                                                                                                                              |      |          |          |          |          |          |    |
|--------------------------------------------------------------------------------------------------------------------------------------------------------------|------|----------|----------|----------|----------|----------|----|
| 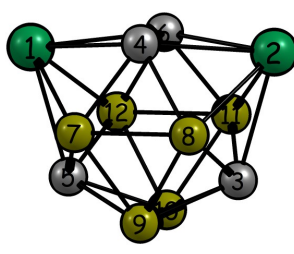 <p>1. -3220.819716 0.0 <math>C_{2v}</math></p> <p>WBI: Fe1-Fe2: 0.1305</p> |      | 1        | 2        | 3        | 4        | 5        |    |
|                                                                                                                                                              | 1 Fe | 0.000000 |          |          |          |          |    |
|                                                                                                                                                              | 2 Fe | 3.798561 | 0.000000 |          |          |          |    |
|                                                                                                                                                              | 3 C  | 3.777720 | 2.053171 | 0.000000 |          |          |    |
|                                                                                                                                                              | 4 C  | 2.062214 | 2.061554 | 2.640337 | 0.000000 |          |    |
|                                                                                                                                                              | 5 C  | 2.053532 | 3.779156 | 2.648462 | 2.642033 | 0.000000 |    |
|                                                                                                                                                              | 6 C  | 2.062530 | 2.061679 | 2.640578 | 1.566766 | 2.642137 |    |
|                                                                                                                                                              | 7 B  | 2.055483 | 3.318552 | 2.750521 | 1.694421 | 1.684749 |    |
|                                                                                                                                                              | 8 B  | 3.318138 | 2.055584 | 1.683923 | 1.693681 | 2.751665 |    |
|                                                                                                                                                              | 9 B  | 3.299495 | 3.299866 | 1.690794 | 2.729129 | 1.691213 |    |
|                                                                                                                                                              | 10 B | 3.299291 | 3.300262 | 1.691344 | 3.192934 | 1.690524 |    |
|                                                                                                                                                              | 11 B | 3.318776 | 2.055839 | 1.683887 | 2.689804 | 2.751633 |    |
|                                                                                                                                                              | 12 B | 2.055557 | 3.318097 | 2.750629 | 2.689476 | 1.684940 |    |
|                                                                                                                                                              |      |          | 6        | 7        | 8        | 9        | 10 |
|                                                                                                                                                              | 6 C  | 0.000000 |          |          |          |          |    |
|                                                                                                                                                              | 7 B  | 2.690208 | 0.000000 |          |          |          |    |
|                                                                                                                                                              | 8 B  | 2.689671 | 1.786518 | 0.000000 |          |          |    |
|                                                                                                                                                              | 9 B  | 3.193192 | 1.758103 | 1.758367 | 0.000000 |          |    |
|                                                                                                                                                              | 10 B | 2.729320 | 2.823976 | 2.824467 | 1.753284 | 0.000000 |    |
|                                                                                                                                                              | 11 B | 1.694222 | 3.309939 | 2.786132 | 2.824276 | 1.758563 |    |
|                                                                                                                                                              | 12 B | 1.693721 | 2.786232 | 3.309554 | 2.824529 | 1.758342 |    |
|                                                                                                                                                              |      |          | 11       | 12       |          |          |    |
|                                                                                                                                                              | 11 B | 0.000000 |          |          |          |          |    |
|                                                                                                                                                              | 12 B | 1.786499 | 0.000000 |          |          |          |    |

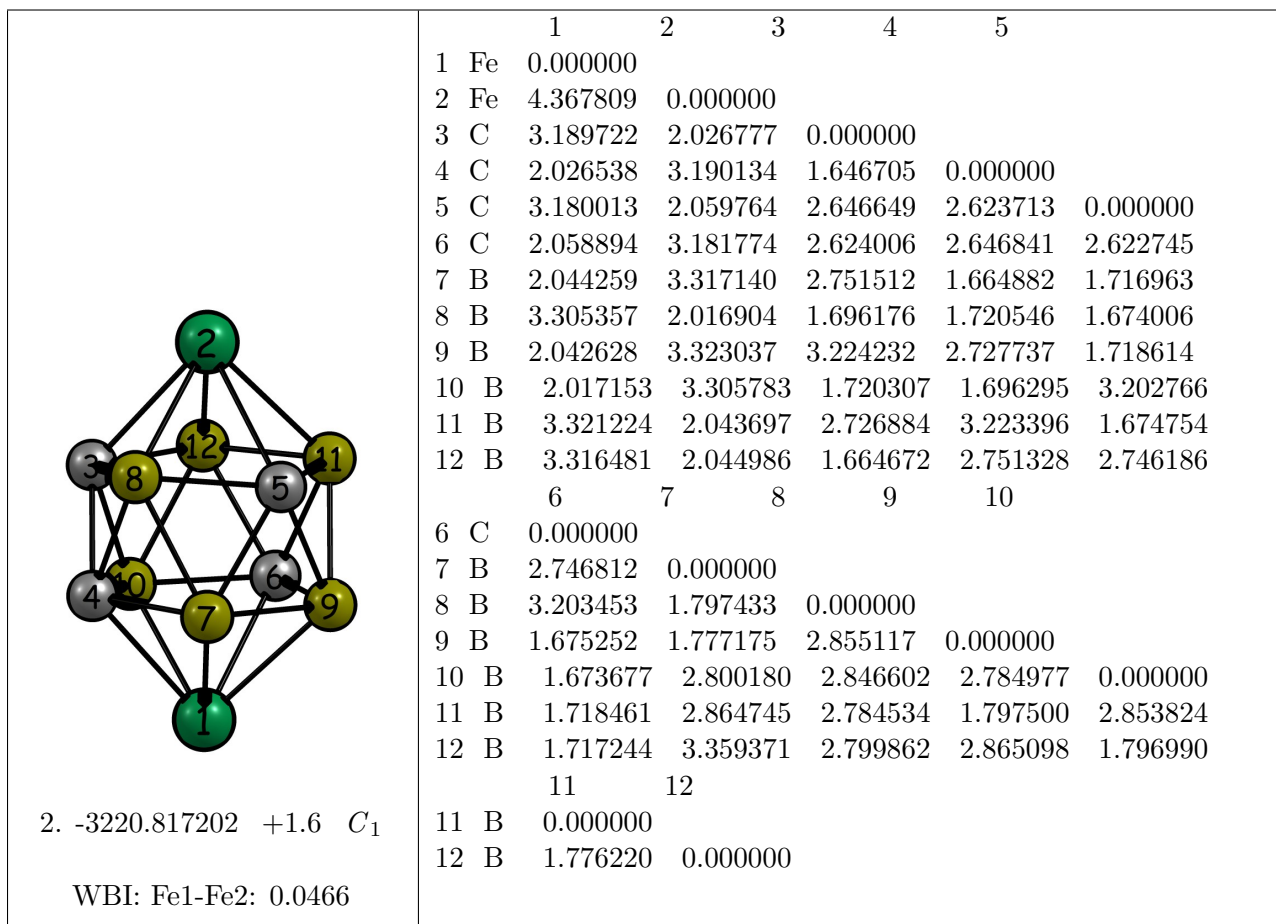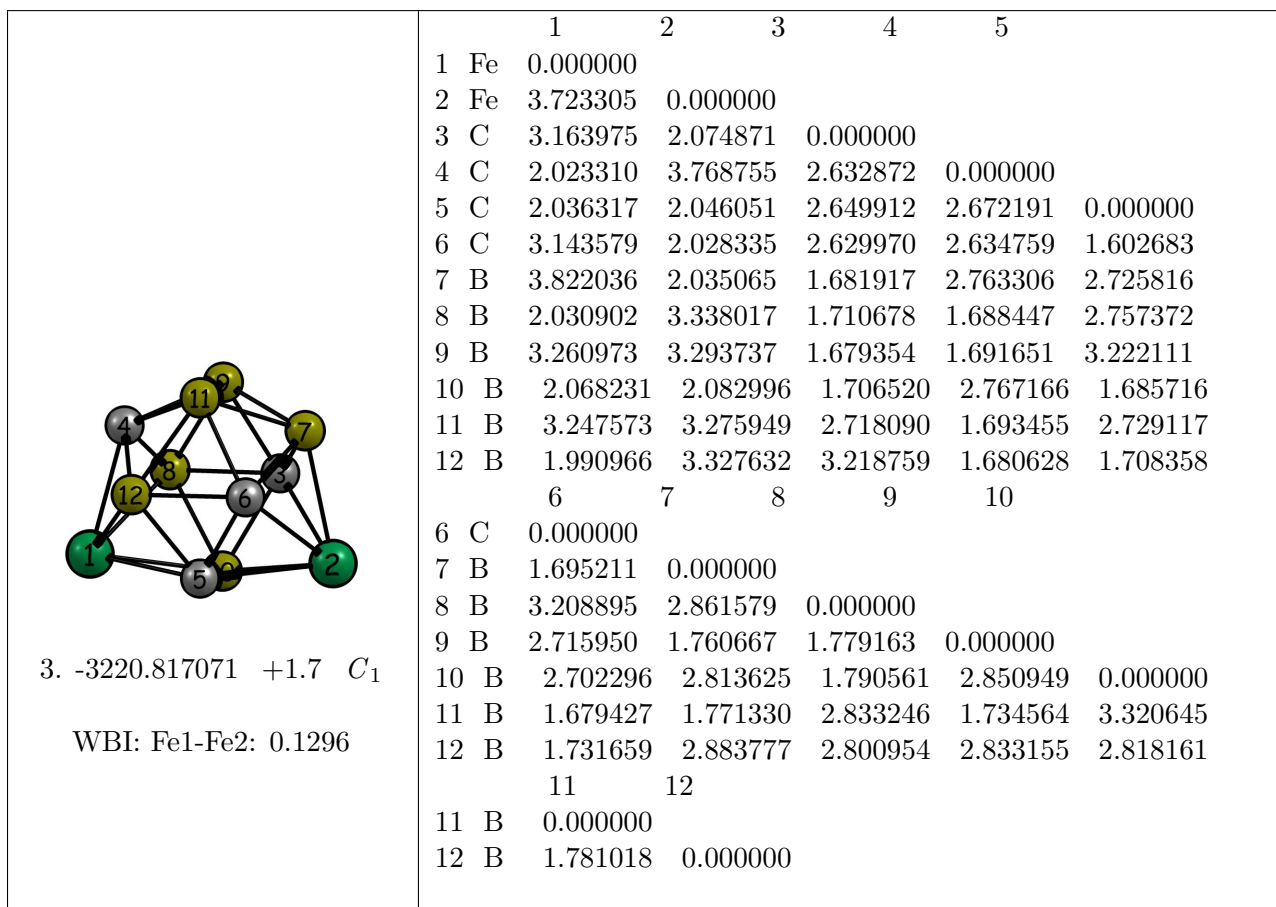

|                                                                                                                                                            |          |          |          |          |          |          |
|------------------------------------------------------------------------------------------------------------------------------------------------------------|----------|----------|----------|----------|----------|----------|
| 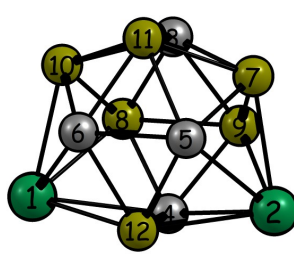 <p>4. -3220.814352 +3.4 <math>C_s</math></p> <p>WBI: Fe1-Fe2: 0.1283</p> | 1        | 2        | 3        | 4        | 5        |          |
|                                                                                                                                                            | 1 Fe     | 0.000000 |          |          |          |          |
|                                                                                                                                                            | 2 Fe     | 3.702671 | 0.000000 |          |          |          |
|                                                                                                                                                            | 3 C      | 3.135131 | 3.135670 | 0.000000 |          |          |
|                                                                                                                                                            | 4 C      | 2.058471 | 2.058634 | 2.619985 | 0.000000 |          |
|                                                                                                                                                            | 5 C      | 3.178270 | 2.004772 | 2.593115 | 2.684718 | 0.000000 |
|                                                                                                                                                            | 6 C      | 2.005582 | 3.176828 | 2.593061 | 2.684226 | 1.641000 |
|                                                                                                                                                            | 7 B      | 3.854597 | 2.007697 | 1.719031 | 2.770659 | 1.684359 |
|                                                                                                                                                            | 8 B      | 2.035249 | 3.286609 | 1.714929 | 1.680140 | 3.232822 |
|                                                                                                                                                            | 9 B      | 3.284532 | 2.036941 | 1.715908 | 1.678069 | 2.739765 |
|                                                                                                                                                            | 10 B     | 2.008434 | 3.855223 | 1.719683 | 2.772294 | 2.763147 |
|                                                                                                                                                            | 11 B     | 3.239237 | 3.238613 | 1.656166 | 3.234261 | 1.678751 |
|                                                                                                                                                            | 12 B     | 2.044705 | 2.043735 | 3.161268 | 1.680825 | 1.736500 |
|                                                                                                                                                            | 6 C      | 0.000000 |          |          |          |          |
|                                                                                                                                                            | 7 B      | 2.763212 | 0.000000 |          |          |          |
| 8 B                                                                                                                                                        | 2.738561 | 2.898037 | 0.000000 |          |          |          |
| 9 B                                                                                                                                                        | 3.232450 | 1.774999 | 1.795811 | 0.000000 |          |          |
| 10 B                                                                                                                                                       | 1.683881 | 2.924377 | 1.774769 | 2.899148 | 0.000000 |          |
| 11 B                                                                                                                                                       | 1.679183 | 1.781163 | 2.844196 | 2.845279 | 1.780546 |          |
| 12 B                                                                                                                                                       | 1.735785 | 2.837240 | 2.793966 | 2.793348 | 2.837704 |          |
| 11 B                                                                                                                                                       | 0.000000 |          |          |          |          |          |
| 12 B                                                                                                                                                       | 2.841032 | 0.000000 |          |          |          |          |

|                                                                                                                                                              |          |          |          |          |          |          |
|--------------------------------------------------------------------------------------------------------------------------------------------------------------|----------|----------|----------|----------|----------|----------|
| 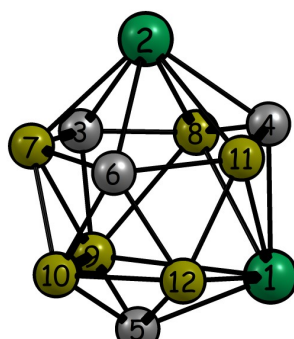 <p>5. -3220.813035 +4.2 <math>C_1</math></p> <p>WBI: Fe1-Fe2: 0.1021</p> | 1        | 2        | 3        | 4        | 5        |          |
|                                                                                                                                                              | 1 Fe     | 0.000000 |          |          |          |          |
|                                                                                                                                                              | 2 Fe     | 3.619756 | 0.000000 |          |          |          |
|                                                                                                                                                              | 3 C      | 3.244523 | 2.049832 | 0.000000 |          |          |
|                                                                                                                                                              | 4 C      | 2.023568 | 2.047418 | 2.635502 | 0.000000 |          |
|                                                                                                                                                              | 5 C      | 1.944895 | 3.839572 | 2.958537 | 3.224017 | 0.000000 |
|                                                                                                                                                              | 6 C      | 3.136368 | 2.176852 | 2.702938 | 2.759126 | 2.541618 |
|                                                                                                                                                              | 7 B      | 3.670226 | 2.067623 | 1.545959 | 3.189476 | 2.804836 |
|                                                                                                                                                              | 8 B      | 2.380976 | 2.241978 | 1.568300 | 1.543887 | 3.092644 |
|                                                                                                                                                              | 9 B      | 2.455566 | 3.228816 | 1.651799 | 3.008833 | 1.571196 |
|                                                                                                                                                              | 10 B     | 3.151349 | 3.393687 | 2.826896 | 3.642310 | 1.584512 |
|                                                                                                                                                              | 11 B     | 2.273633 | 2.204766 | 3.151725 | 1.537078 | 2.878200 |
|                                                                                                                                                              | 12 B     | 2.158052 | 3.414569 | 3.476511 | 2.874438 | 1.617732 |
|                                                                                                                                                              | 6 C      | 0.000000 |          |          |          |          |
|                                                                                                                                                              | 7 B      | 1.672939 | 0.000000 |          |          |          |
| 8 B                                                                                                                                                          | 3.185943 | 2.786281 | 0.000000 |          |          |          |
| 9 B                                                                                                                                                          | 2.768619 | 2.109040 | 2.165833 | 0.000000 |          |          |
| 10 B                                                                                                                                                         | 1.636182 | 1.859160 | 3.570602 | 2.063789 | 0.000000 |          |
| 11 B                                                                                                                                                         | 1.726142 | 2.924838 | 2.722282 | 3.233987 | 2.901829 |          |
| 12 B                                                                                                                                                         | 1.695007 | 2.907070 | 3.465098 | 2.737665 | 1.736892 |          |
| 11 B                                                                                                                                                         | 0.000000 |          |          |          |          |          |
| 12 B                                                                                                                                                         | 1.808598 | 0.000000 |          |          |          |          |



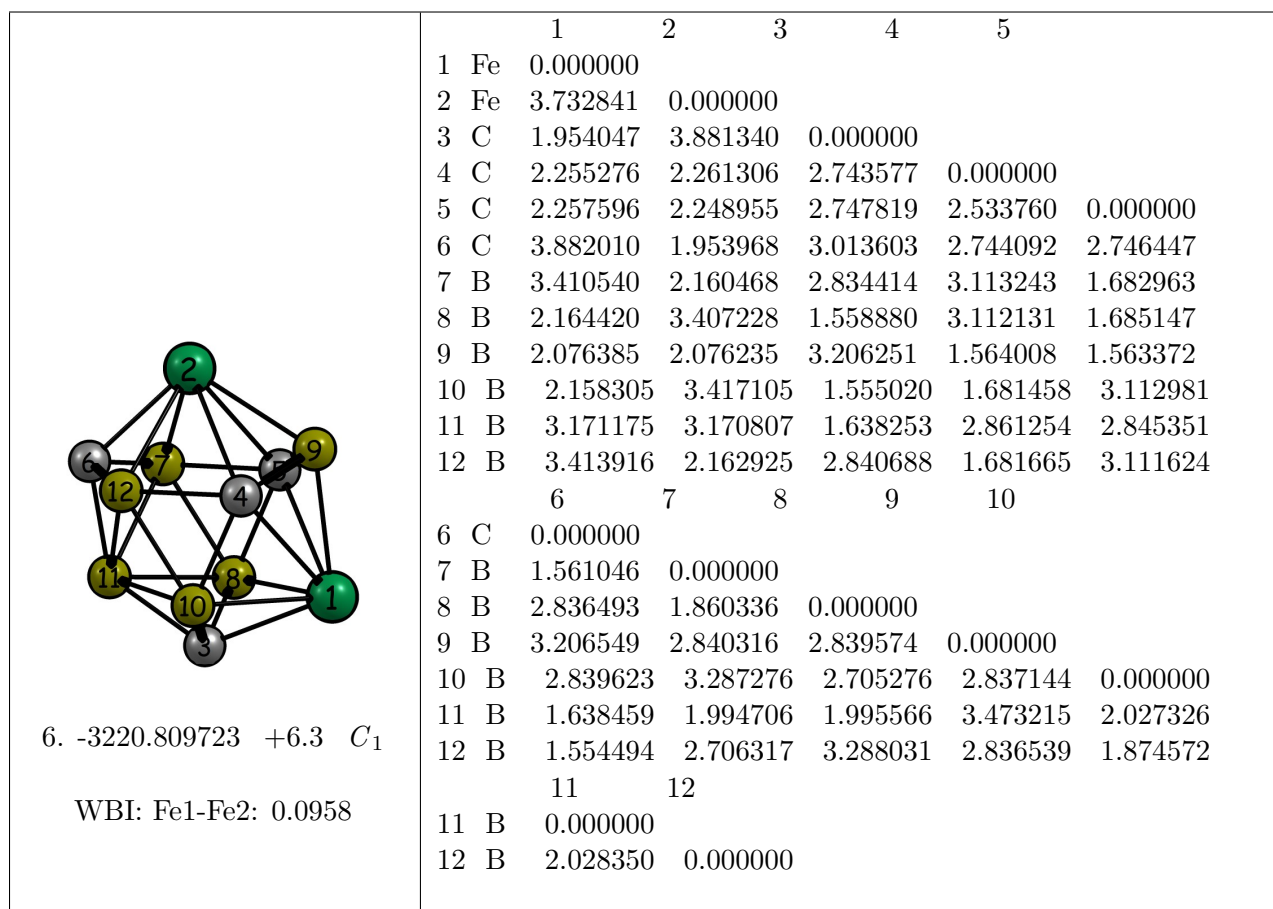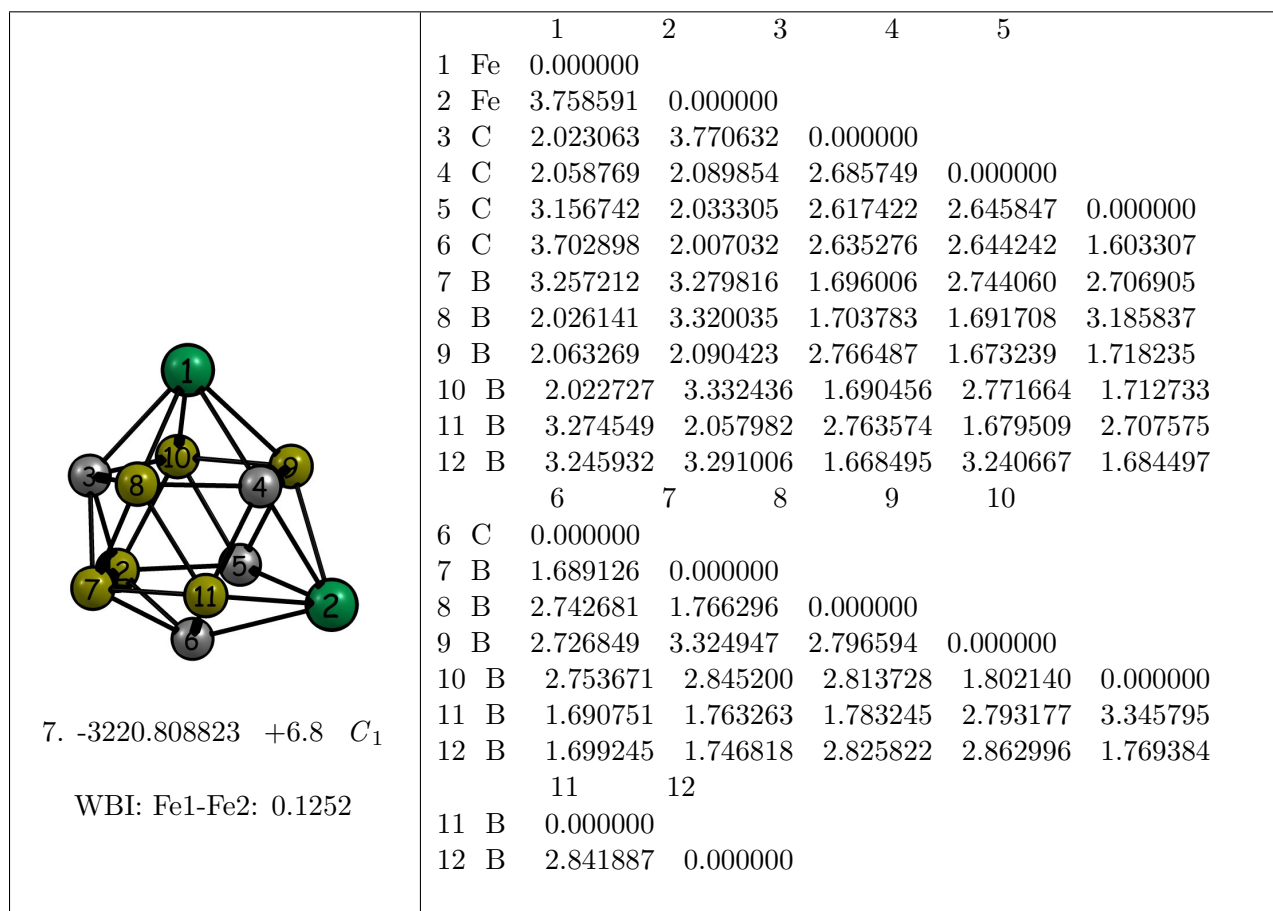

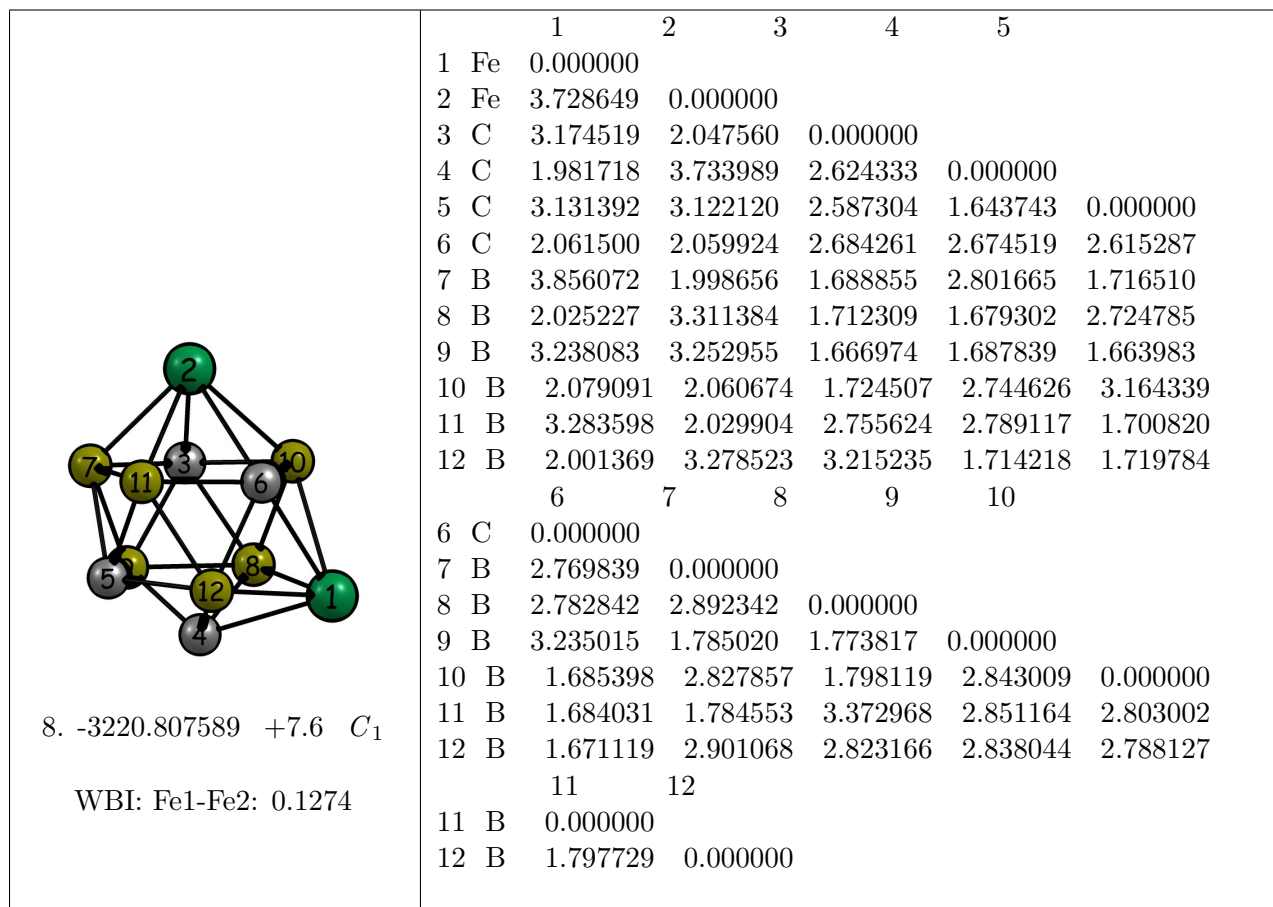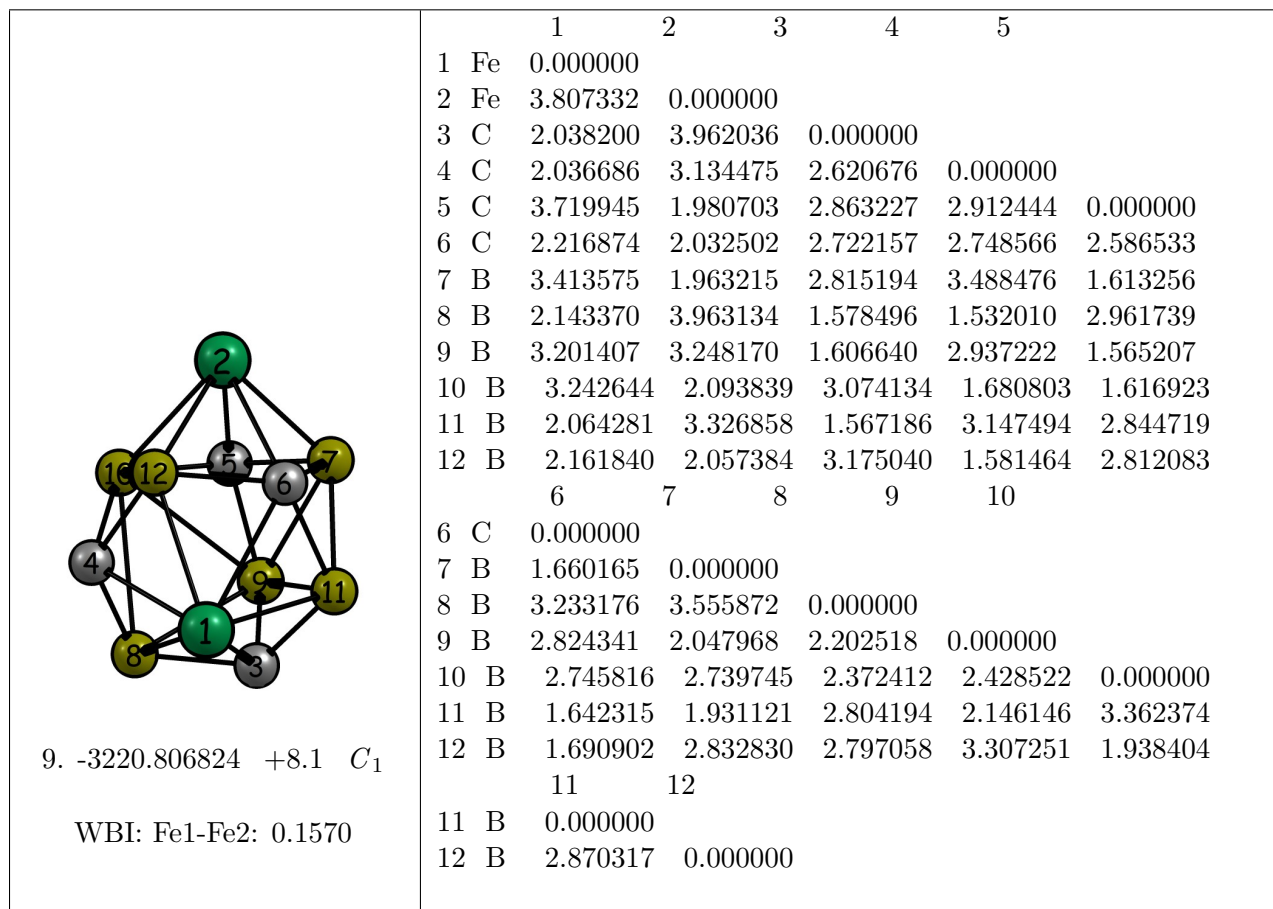

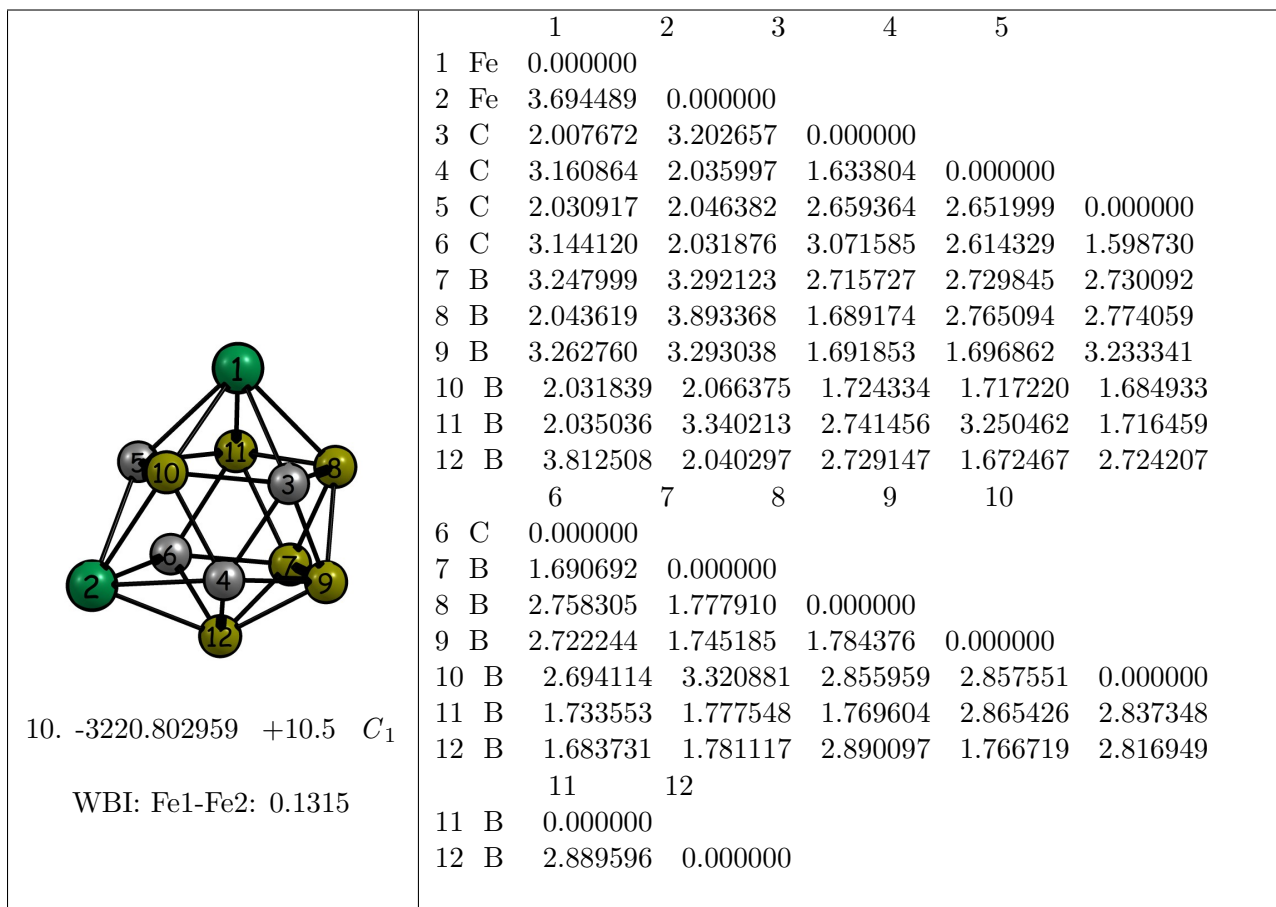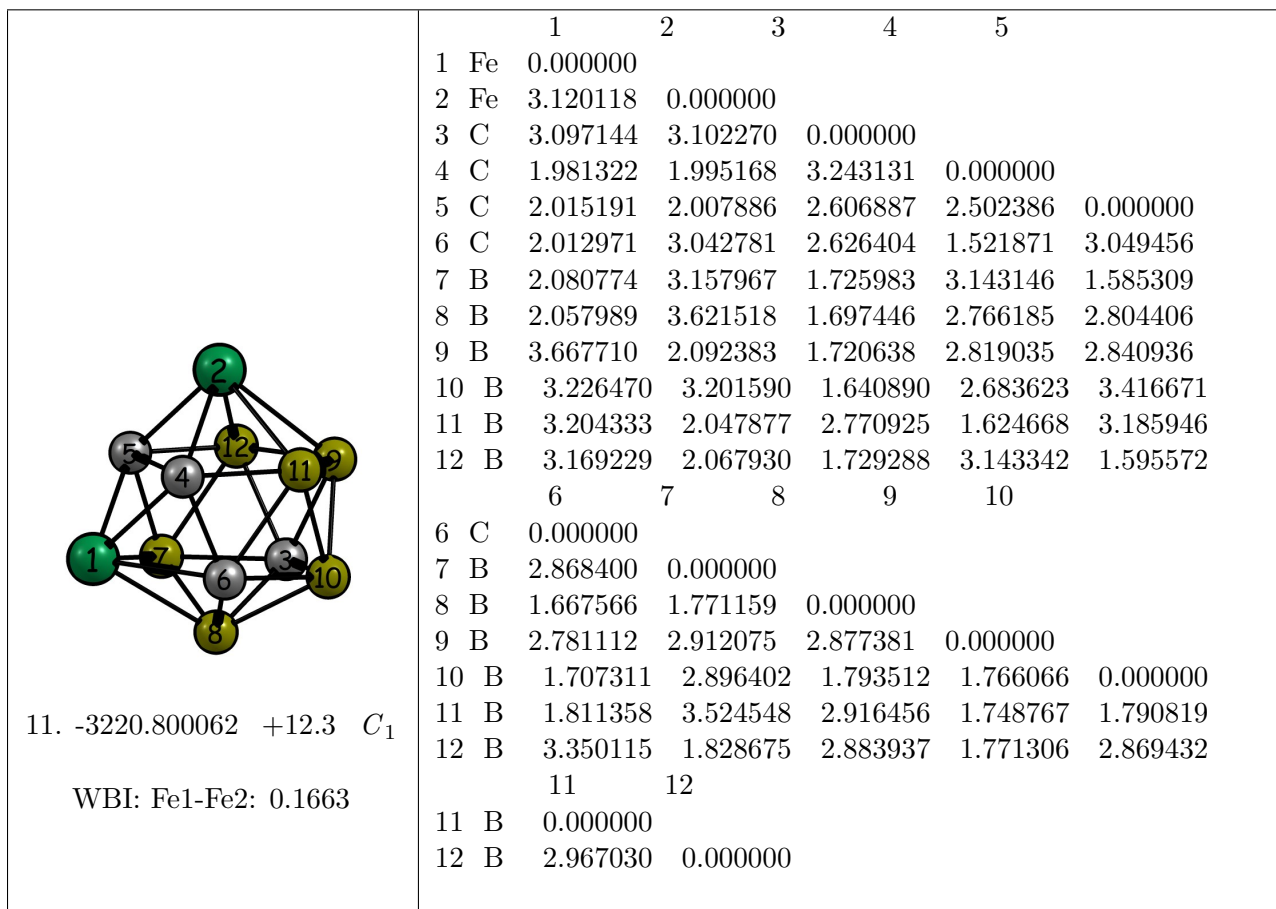

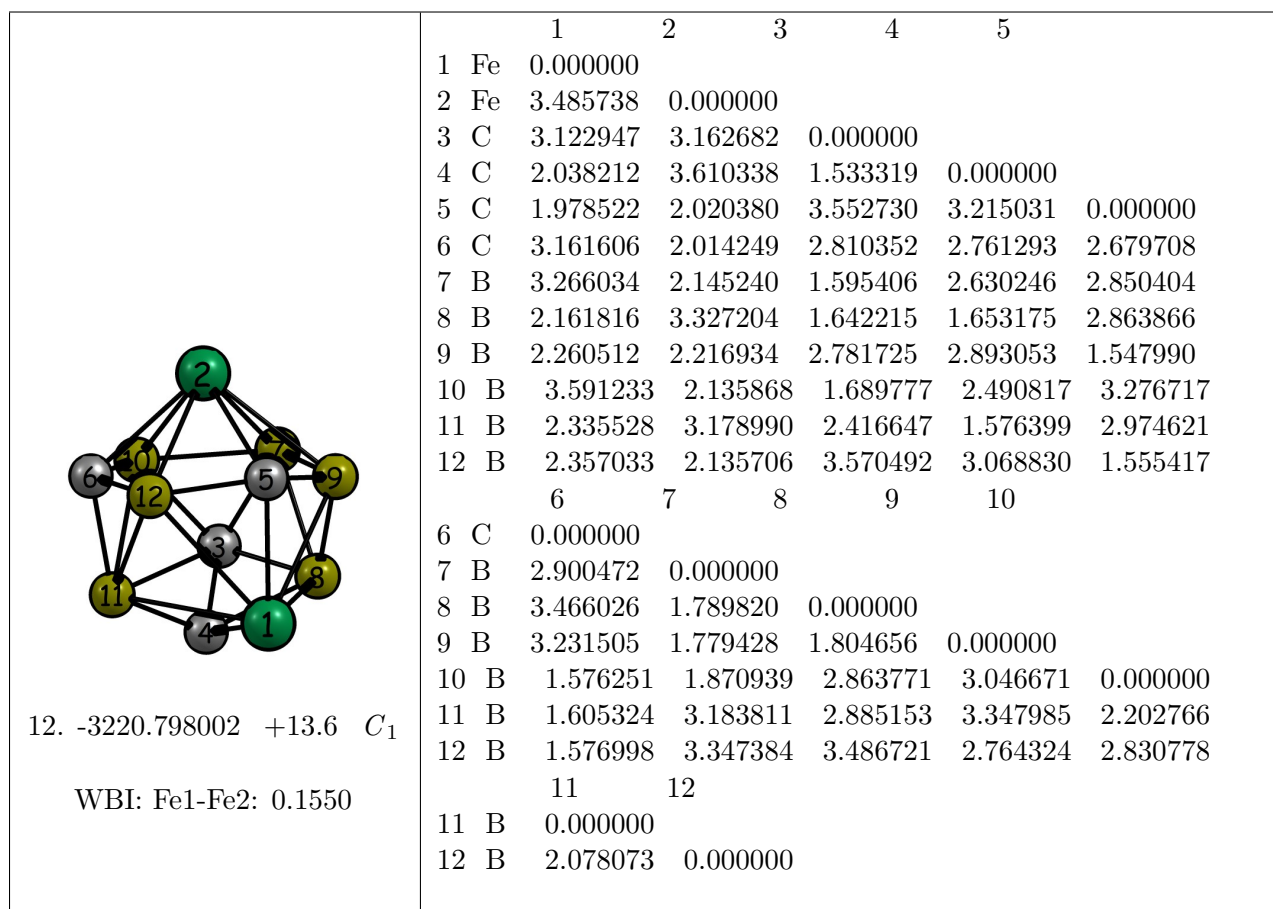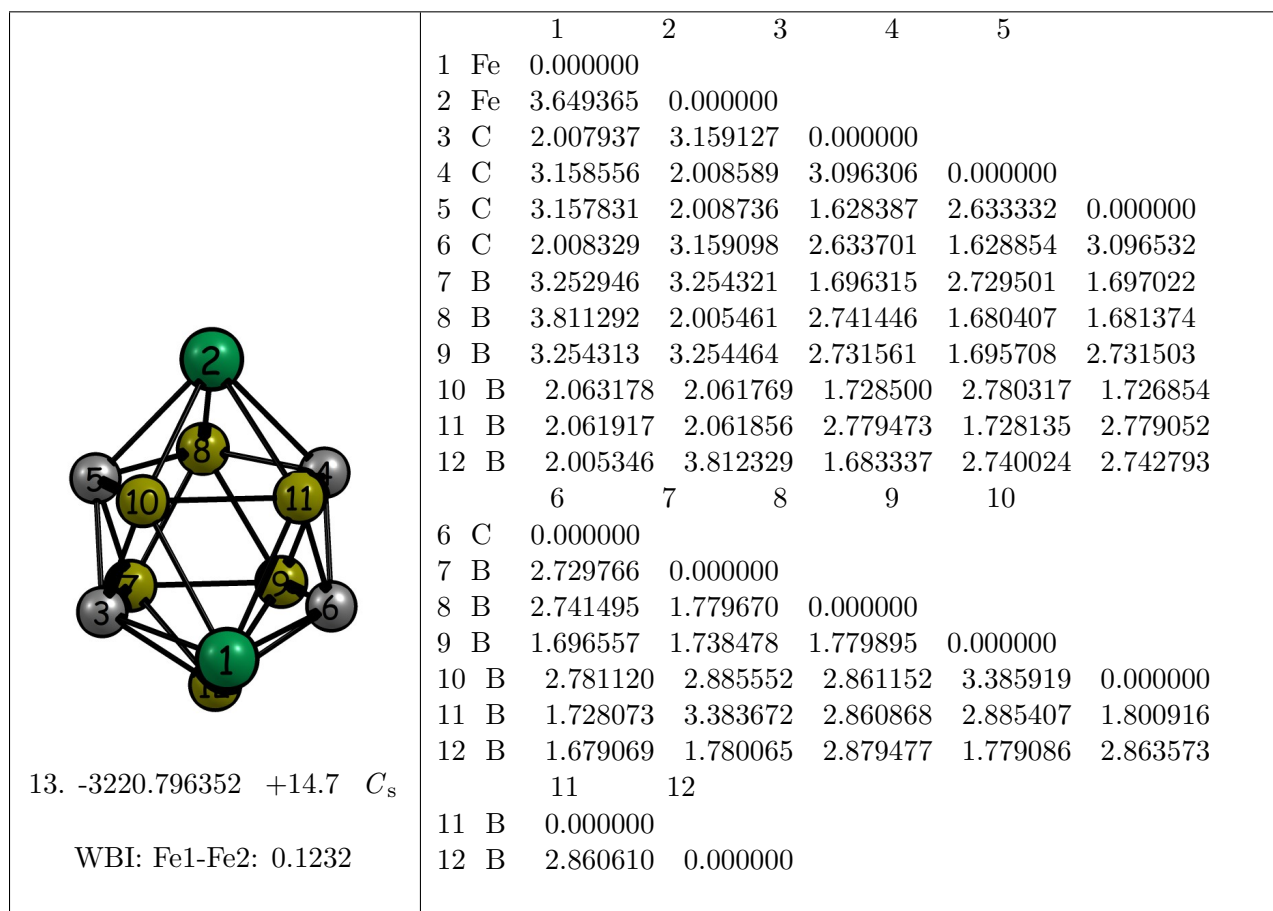

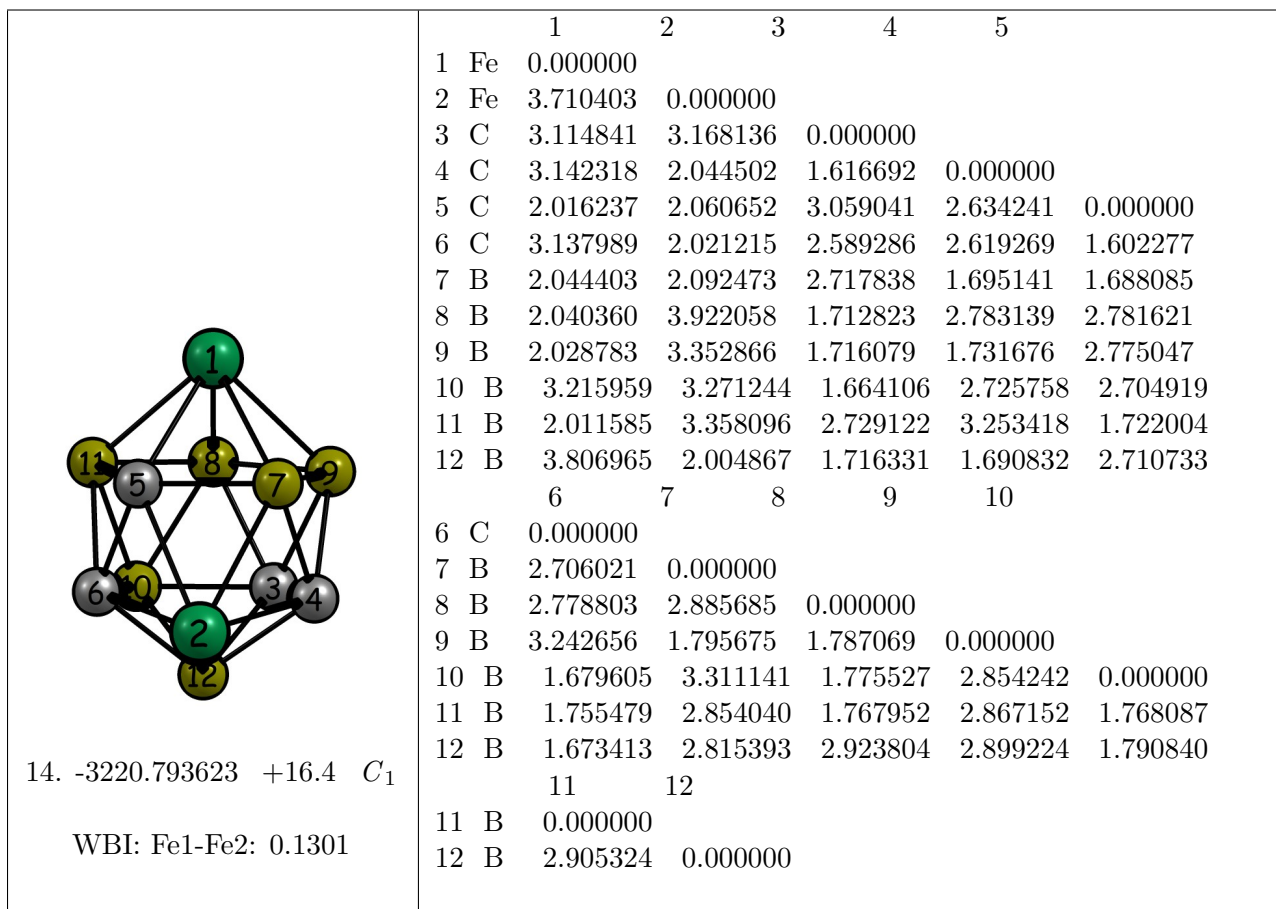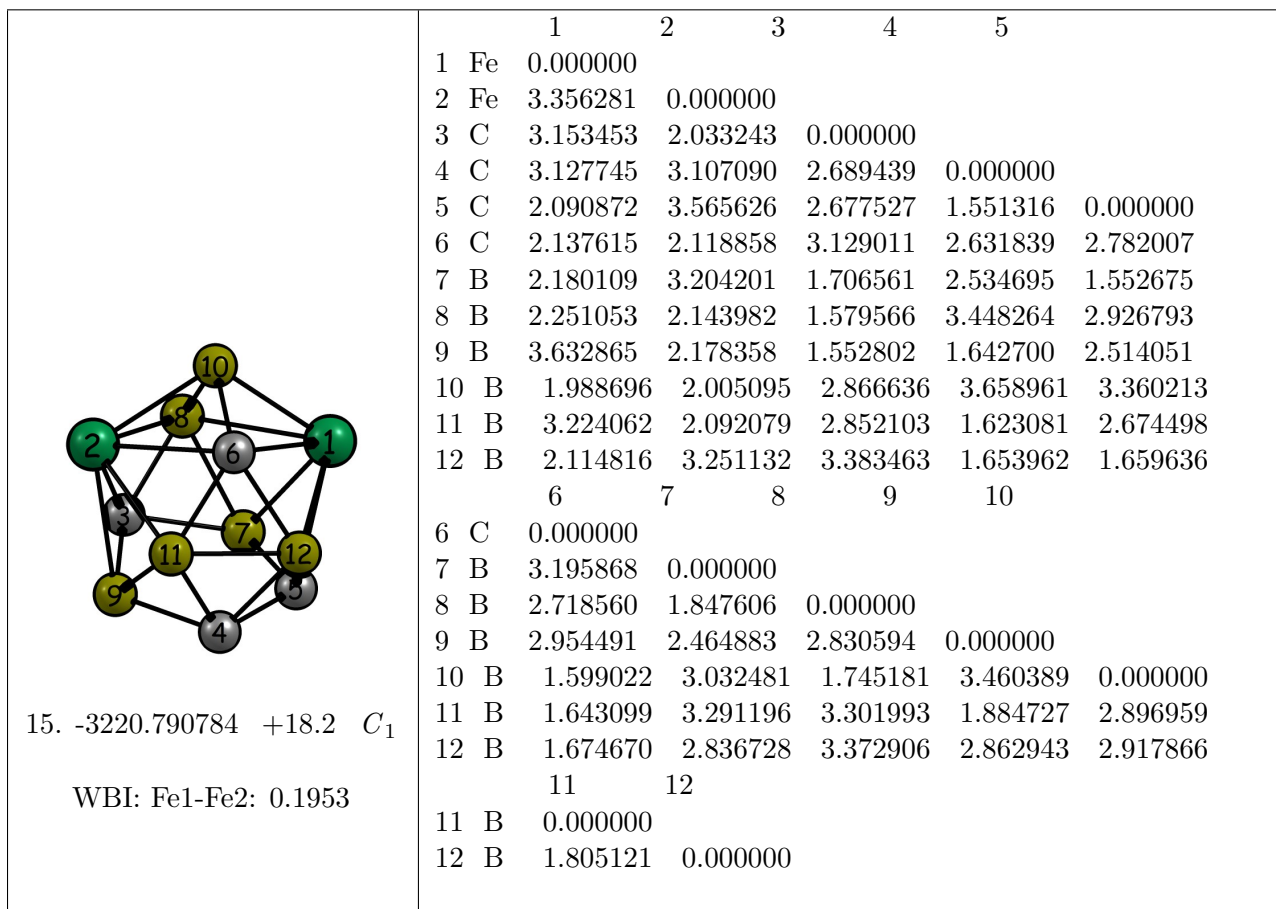

Table S3B: Energy ranking for the lowest-lying  $\text{Cp}_2\text{Fe}_2\text{C}_4\text{B}_6\text{H}_{10}$  optimized structures at the B3LYP/6-31G(d) level of theory.

| No. | Initial structure            | Final Energy (a.u.) | Relative Energy (kcal/mol) |
|-----|------------------------------|---------------------|----------------------------|
| 1   | 12v-03-Anticuboh—fe2c4—1061  | -3221.571882        | 0.0                        |
| 2   | 12v-03-Anticuboh—fe2c4—1682  | -3221.570788        | 0.7                        |
| 3   | 12v-02-Cuboctaedru—fe2c4—473 | -3221.57078         | 0.7                        |
| 4   | 12v-02-Cuboctaedru—fe2c4—487 | -3221.57078         | 0.7                        |
| 5   | 12v-02-Cuboctaedru—fe2c4—501 | -3221.57078         | 0.7                        |
| 6   | 12v-02-Cuboctaedru—fe2c4—480 | -3221.570779        | 0.7                        |
| 7   | 12v-02-Cuboctaedru—fe2c4—599 | -3221.570625        | 0.8                        |
| 8   | 12v-02-Cuboctaedru—fe2c4—704 | -3221.570625        | 0.8                        |
| 9   | 12v-03-Anticuboh—fe2c4—1084  | -3221.57004         | 1.2                        |
| 10  | 12v-03-Anticuboh—fe2c4—1071  | -3221.569965        | 1.2                        |
| 11  | 12v-03-Anticuboh—fe2c4—1750  | -3221.569951        | 1.2                        |
| 12  | 12v-01-Icos—fe2c4—119        | -3221.569644        | 1.4                        |
| 13  | 12v-01-Icos—fe2c4—83         | -3221.569644        | 1.4                        |
| 14  | 12v-02-Cuboctaedru—fe2c4—529 | -3221.569462        | 1.5                        |
| 15  | 12v-02-Cuboctaedru—fe2c4—676 | -3221.569462        | 1.5                        |
| 16  | 12v-02-Cuboctaedru—fe2c4—783 | -3221.569462        | 1.5                        |
| 17  | 12v-02-Cuboctaedru—fe2c4—527 | -3221.569374        | 1.6                        |
| 18  | 12v-01-Icos—fe2c4—3          | -3221.56931         | 1.6                        |
| 19  | 12v-02-Cuboctaedru—fe2c4—258 | -3221.569282        | 1.6                        |
| 20  | 12v-02-Cuboctaedru—fe2c4—280 | -3221.569282        | 1.6                        |
| 21  | 12v-01-Icos—fe2c4—17         | -3221.569264        | 1.6                        |
| 22  | 12v-03-Anticuboh—fe2c4—1198  | -3221.569156        | 1.7                        |
| 23  | 12v-02-Cuboctaedru—fe2c4—324 | -3221.568811        | 1.9                        |
| 24  | 12v-03-Anticuboh—fe2c4—1558  | -3221.568704        | 2.0                        |
| 25  | 12v-03-Anticuboh—fe2c4—1585  | -3221.568704        | 2.0                        |
| 26  | 12v-03-Anticuboh—fe2c4—1599  | -3221.568704        | 2.0                        |
| 27  | 12v-03-Anticuboh—fe2c4—1538  | -3221.567555        | 2.7                        |
| 28  | 12v-03-Anticuboh—fe2c4—1200  | -3221.566919        | 3.1                        |
| 29  | 12v-03-Anticuboh—fe2c4—1606  | -3221.566825        | 3.2                        |
| 30  | 12v-03-Anticuboh—fe2c4—1537  | -3221.566822        | 3.2                        |
| 31  | 12v-03-Anticuboh—fe2c4—1563  | -3221.566822        | 3.2                        |
| 32  | 12v-03-Anticuboh—fe2c4—1591  | -3221.566822        | 3.2                        |
| 33  | 12v-03-Anticuboh—fe2c4—1044  | -3221.566521        | 3.4                        |
| 34  | 12v-03-Anticuboh—fe2c4—1107  | -3221.566521        | 3.4                        |
| 35  | 12v-03-Anticuboh—fe2c4—1037  | -3221.566426        | 3.4                        |
| 36  | 12v-01-Icos—fe2c4—127        | -3221.566254        | 3.5                        |
| 37  | 12v-01-Icos—fe2c4—62         | -3221.566254        | 3.5                        |
| 38  | 12v-02-Cuboctaedru—fe2c4—598 | -3221.566246        | 3.5                        |
| 39  | 12v-02-Cuboctaedru—fe2c4—710 | -3221.566246        | 3.5                        |
| 40  | 12v-02-Cuboctaedru—fe2c4—717 | -3221.566246        | 3.5                        |
| 41  | 12v-03-Anticuboh—fe2c4—1083  | -3221.564939        | 4.4                        |
| 42  | 12v-01-Icos—fe2c4—126        | -3221.564609        | 4.6                        |
| 43  | 12v-03-Anticuboh—fe2c4—1543  | -3221.561632        | 6.4                        |
| 44  | 12v-03-Anticuboh—fe2c4—1381  | -3221.561405        | 6.6                        |
| 45  | 12v-03-Anticuboh—fe2c4—1388  | -3221.561405        | 6.6                        |
| 46  | 12v-03-Anticuboh—fe2c4—1393  | -3221.561362        | 6.6                        |
| 47  | 12v-01-Icos—fe2c4—128        | -3221.561268        | 6.7                        |
| 48  | 12v-01-Icos—fe2c4—133        | -3221.561137        | 6.7                        |

|    |                    |       |      |              |      |
|----|--------------------|-------|------|--------------|------|
| 49 | 12v-02-Cuboctaedru | fe2c4 | 597  | -3221.560922 | 6.9  |
| 50 | 12v-02-Cuboctaedru | fe2c4 | 639  | -3221.560922 | 6.9  |
| 51 | 12v-02-Cuboctaedru | fe2c4 | 772  | -3221.560922 | 6.9  |
| 52 | 12v-02-Cuboctaedru | fe2c4 | 602  | -3221.560823 | 6.9  |
| 53 | 12v-02-Cuboctaedru | fe2c4 | 613  | -3221.560823 | 6.9  |
| 54 | 12v-02-Cuboctaedru | fe2c4 | 594  | -3221.560446 | 7.2  |
| 55 | 12v-02-Cuboctaedru | fe2c4 | 833  | -3221.560178 | 7.3  |
| 56 | 12v-02-Cuboctaedru | fe2c4 | 593  | -3221.559748 | 7.6  |
| 57 | 12v-03-Anticuboh   | fe2c4 | 1039 | -3221.557469 | 9.0  |
| 58 | 12v-03-Anticuboh   | fe2c4 | 1040 | -3221.557417 | 9.1  |
| 59 | 12v-03-Anticuboh   | fe2c4 | 1032 | -3221.557399 | 9.1  |
| 60 | 12v-03-Anticuboh   | fe2c4 | 1598 | -3221.557368 | 9.1  |
| 61 | 12v-02-Cuboctaedru | fe2c4 | 614  | -3221.557361 | 9.1  |
| 62 | 12v-02-Cuboctaedru | fe2c4 | 707  | -3221.557361 | 9.1  |
| 63 | 12v-03-Anticuboh   | fe2c4 | 1810 | -3221.55724  | 9.2  |
| 64 | 12v-03-Anticuboh   | fe2c4 | 1824 | -3221.557239 | 9.2  |
| 65 | 12v-03-Anticuboh   | fe2c4 | 1801 | -3221.557236 | 9.2  |
| 66 | 12v-03-Anticuboh   | fe2c4 | 1797 | -3221.557213 | 9.2  |
| 67 | 12v-03-Anticuboh   | fe2c4 | 1804 | -3221.557213 | 9.2  |
| 68 | 12v-03-Anticuboh   | fe2c4 | 1794 | -3221.557195 | 9.2  |
| 69 | 12v-03-Anticuboh   | fe2c4 | 1214 | -3221.557118 | 9.3  |
| 70 | 12v-03-Anticuboh   | fe2c4 | 1218 | -3221.55699  | 9.3  |
| 71 | 12v-03-Anticuboh   | fe2c4 | 1385 | -3221.556895 | 9.4  |
| 72 | 12v-03-Anticuboh   | fe2c4 | 1662 | -3221.556428 | 9.7  |
| 73 | 12v-03-Anticuboh   | fe2c4 | 1584 | -3221.556331 | 9.8  |
| 74 | 12v-03-Anticuboh   | fe2c4 | 1060 | -3221.556133 | 9.9  |
| 75 | 12v-02-Cuboctaedru | fe2c4 | 515  | -3221.556116 | 9.9  |
| 76 | 12v-02-Cuboctaedru | fe2c4 | 678  | -3221.556116 | 9.9  |
| 77 | 12v-02-Cuboctaedru | fe2c4 | 699  | -3221.556116 | 9.9  |
| 78 | 12v-03-Anticuboh   | fe2c4 | 1743 | -3221.555854 | 10.1 |
| 79 | 12v-02-Cuboctaedru | fe2c4 | 779  | -3221.555847 | 10.1 |
| 80 | 12v-02-Cuboctaedru | fe2c4 | 605  | -3221.555844 | 10.1 |
| 81 | 12v-01-Icos        | fe2c4 | 79   | -3221.555694 | 10.2 |
| 82 | 12v-01-Icos        | fe2c4 | 91   | -3221.555694 | 10.2 |
| 83 | 12v-02-Cuboctaedru | fe2c4 | 534  | -3221.555343 | 10.4 |
| 84 | 12v-02-Cuboctaedru | fe2c4 | 449  | -3221.554702 | 10.8 |
| 85 | 12v-02-Cuboctaedru | fe2c4 | 475  | -3221.554663 | 10.8 |
| 86 | 12v-02-Cuboctaedru | fe2c4 | 489  | -3221.554663 | 10.8 |
| 87 | 12v-02-Cuboctaedru | fe2c4 | 588  | -3221.55457  | 10.9 |
| 88 | 12v-02-Cuboctaedru | fe2c4 | 518  | -3221.554537 | 10.9 |
| 89 | 12v-03-Anticuboh   | fe2c4 | 1638 | -3221.554326 | 11.0 |
| 90 | 12v-03-Anticuboh   | fe2c4 | 1778 | -3221.554326 | 11.0 |
| 91 | 12v-02-Cuboctaedru | fe2c4 | 539  | -3221.554256 | 11.1 |
| 92 | 12v-02-Cuboctaedru | fe2c4 | 681  | -3221.55384  | 11.3 |
| 93 | 12v-03-Anticuboh   | fe2c4 | 1505 | -3221.552717 | 12.0 |
| 94 | 12v-03-Anticuboh   | fe2c4 | 1338 | -3221.552582 | 12.1 |
| 95 | 12v-03-Anticuboh   | fe2c4 | 1351 | -3221.552572 | 12.1 |
| 96 | 12v-03-Anticuboh   | fe2c4 | 1358 | -3221.552572 | 12.1 |
| 97 | 12v-03-Anticuboh   | fe2c4 | 1434 | -3221.552572 | 12.1 |
| 98 | 12v-03-Anticuboh   | fe2c4 | 1347 | -3221.552567 | 12.1 |
| 99 | 12v-03-Anticuboh   | fe2c4 | 1354 | -3221.552567 | 12.1 |

|     |                                  |              |      |
|-----|----------------------------------|--------------|------|
| 100 | 12v-03-Anticuboh — fe2c4 — 1772  | -3221.552544 | 12.1 |
| 101 | 12v-03-Anticuboh — fe2c4 — 1534  | -3221.552528 | 12.1 |
| 102 | 12v-03-Anticuboh — fe2c4 — 1569  | -3221.552528 | 12.1 |
| 103 | 12v-03-Anticuboh — fe2c4 — 1072  | -3221.552512 | 12.2 |
| 104 | 12v-03-Anticuboh — fe2c4 — 1819  | -3221.55248  | 12.2 |
| 105 | 12v-03-Anticuboh — fe2c4 — 1380  | -3221.5524   | 12.2 |
| 106 | 12v-03-Anticuboh — fe2c4 — 1102  | -3221.552394 | 12.2 |
| 107 | 12v-03-Anticuboh — fe2c4 — 1270  | -3221.552337 | 12.3 |
| 108 | 12v-01-Icos — fe2c4 — 45         | -3221.552309 | 12.3 |
| 109 | 12v-03-Anticuboh — fe2c4 — 1825  | -3221.552309 | 12.3 |
| 110 | 12v-03-Anticuboh — fe2c4 — 1860  | -3221.552309 | 12.3 |
| 111 | 12v-03-Anticuboh — fe2c4 — 1737  | -3221.552307 | 12.3 |
| 112 | 12v-02-Cuboctaedru — fe2c4 — 683 | -3221.552303 | 12.3 |
| 113 | 12v-02-Cuboctaedru — fe2c4 — 698 | -3221.552303 | 12.3 |
| 114 | 12v-02-Cuboctaedru — fe2c4 — 817 | -3221.552303 | 12.3 |
| 115 | 12v-01-Icos — fe2c4 — 37         | -3221.552287 | 12.3 |
| 116 | 12v-03-Anticuboh — fe2c4 — 1068  | -3221.55225  | 12.3 |
| 117 | 12v-03-Anticuboh — fe2c4 — 1633  | -3221.552228 | 12.3 |
| 118 | 12v-03-Anticuboh — fe2c4 — 1390  | -3221.552173 | 12.4 |
| 119 | 12v-03-Anticuboh — fe2c4 — 1431  | -3221.552173 | 12.4 |
| 120 | 12v-01-Icos — fe2c4 — 52         | -3221.55215  | 12.4 |
| 121 | 12v-01-Icos — fe2c4 — 65         | -3221.55215  | 12.4 |
| 122 | 12v-01-Icos — fe2c4 — 99         | -3221.55215  | 12.4 |
| 123 | 12v-01-Icos — fe2c4 — 53         | -3221.552143 | 12.4 |
| 124 | 12v-02-Cuboctaedru — fe2c4 — 510 | -3221.552081 | 12.4 |
| 125 | 12v-03-Anticuboh — fe2c4 — 1079  | -3221.551946 | 12.5 |
| 126 | 12v-01-Icos — fe2c4 — 100        | -3221.551842 | 12.6 |
| 127 | 12v-01-Icos — fe2c4 — 86         | -3221.551842 | 12.6 |
| 128 | 12v-03-Anticuboh — fe2c4 — 1209  | -3221.551087 | 13.0 |
| 129 | 12v-03-Anticuboh — fe2c4 — 1244  | -3221.551087 | 13.0 |
| 130 | 12v-03-Anticuboh — fe2c4 — 1258  | -3221.551087 | 13.0 |
| 131 | 12v-03-Anticuboh — fe2c4 — 1265  | -3221.551087 | 13.0 |
| 132 | 12v-02-Cuboctaedru — fe2c4 — 563 | -3221.551073 | 13.1 |
| 133 | 12v-02-Cuboctaedru — fe2c4 — 733 | -3221.551073 | 13.1 |
| 134 | 12v-02-Cuboctaedru — fe2c4 — 740 | -3221.551073 | 13.1 |
| 135 | 12v-03-Anticuboh — fe2c4 — 1814  | -3221.551016 | 13.1 |
| 136 | 12v-03-Anticuboh — fe2c4 — 1843  | -3221.551016 | 13.1 |
| 137 | 12v-03-Anticuboh — fe2c4 — 1900  | -3221.551016 | 13.1 |
| 138 | 12v-03-Anticuboh — fe2c4 — 1724  | -3221.55097  | 13.1 |
| 139 | 12v-03-Anticuboh — fe2c4 — 1847  | -3221.550665 | 13.3 |
| 140 | 12v-03-Anticuboh — fe2c4 — 1205  | -3221.55065  | 13.3 |
| 141 | 12v-03-Anticuboh — fe2c4 — 1254  | -3221.55065  | 13.3 |
| 142 | 12v-03-Anticuboh — fe2c4 — 1261  | -3221.55065  | 13.3 |
| 143 | 12v-03-Anticuboh — fe2c4 — 1229  | -3221.550559 | 13.4 |
| 144 | 12v-02-Cuboctaedru — fe2c4 — 592 | -3221.550463 | 13.4 |
| 145 | 12v-03-Anticuboh — fe2c4 — 1343  | -3221.549996 | 13.7 |
| 146 | 12v-03-Anticuboh — fe2c4 — 1247  | -3221.549922 | 13.8 |
| 147 | 12v-03-Anticuboh — fe2c4 — 1317  | -3221.549922 | 13.8 |
| 148 | 12v-03-Anticuboh — fe2c4 — 1011  | -3221.549917 | 13.8 |
| 149 | 12v-02-Cuboctaedru — fe2c4 — 840 | -3221.549892 | 13.8 |
| 150 | 12v-02-Cuboctaedru — fe2c4 — 889 | -3221.549891 | 13.8 |



|     |                                  |              |      |
|-----|----------------------------------|--------------|------|
| 151 | 12v-02-Cuboctaedru — fe2c4 — 854 | -3221.549875 | 13.8 |
| 152 | 12v-02-Cuboctaedru — fe2c4 — 843 | -3221.549868 | 13.8 |
| 153 | 12v-03-Anticuboh — fe2c4 — 1729  | -3221.549845 | 13.8 |
| 154 | 12v-03-Anticuboh — fe2c4 — 1902  | -3221.5498   | 13.9 |
| 155 | 12v-03-Anticuboh — fe2c4 — 1333  | -3221.549765 | 13.9 |
| 156 | 12v-03-Anticuboh — fe2c4 — 1403  | -3221.549765 | 13.9 |
| 157 | 12v-03-Anticuboh — fe2c4 — 1337  | -3221.549762 | 13.9 |
| 158 | 12v-03-Anticuboh — fe2c4 — 1363  | -3221.549761 | 13.9 |
| 159 | 12v-03-Anticuboh — fe2c4 — 1407  | -3221.549761 | 13.9 |
| 160 | 12v-03-Anticuboh — fe2c4 — 1910  | -3221.549723 | 13.9 |
| 161 | 12v-03-Anticuboh — fe2c4 — 1242  | -3221.549624 | 14.0 |
| 162 | 12v-02-Cuboctaedru — fe2c4 — 330 | -3221.549529 | 14.0 |
| 163 | 12v-01-Icos — fe2c4 — 105        | -3221.549491 | 14.1 |
| 164 | 12v-01-Icos — fe2c4 — 80         | -3221.549491 | 14.1 |
| 165 | 12v-01-Icos — fe2c4 — 30         | -3221.549419 | 14.1 |
| 166 | 12v-03-Anticuboh — fe2c4 — 1080  | -3221.549406 | 14.1 |
| 167 | 12v-03-Anticuboh — fe2c4 — 1217  | -3221.549389 | 14.1 |
| 168 | 12v-03-Anticuboh — fe2c4 — 1661  | -3221.549329 | 14.2 |
| 169 | 12v-03-Anticuboh — fe2c4 — 1672  | -3221.549326 | 14.2 |
| 170 | 12v-02-Cuboctaedru — fe2c4 — 273 | -3221.5493   | 14.2 |
| 171 | 12v-03-Anticuboh — fe2c4 — 1838  | -3221.549299 | 14.2 |
| 172 | 12v-03-Anticuboh — fe2c4 — 1803  | -3221.549298 | 14.2 |
| 173 | 12v-03-Anticuboh — fe2c4 — 1796  | -3221.549296 | 14.2 |
| 174 | 12v-03-Anticuboh — fe2c4 — 1799  | -3221.549261 | 14.2 |
| 175 | 12v-03-Anticuboh — fe2c4 — 1806  | -3221.549261 | 14.2 |
| 176 | 12v-03-Anticuboh — fe2c4 — 1795  | -3221.549248 | 14.2 |
| 177 | 12v-03-Anticuboh — fe2c4 — 1802  | -3221.549248 | 14.2 |
| 178 | 12v-03-Anticuboh — fe2c4 — 1817  | -3221.549248 | 14.2 |
| 179 | 12v-03-Anticuboh — fe2c4 — 1831  | -3221.549248 | 14.2 |
| 180 | 12v-03-Anticuboh — fe2c4 — 1644  | -3221.549213 | 14.2 |
| 181 | 12v-03-Anticuboh — fe2c4 — 1645  | -3221.549167 | 14.3 |
| 182 | 12v-03-Anticuboh — fe2c4 — 1665  | -3221.549167 | 14.3 |
| 183 | 12v-03-Anticuboh — fe2c4 — 1700  | -3221.549167 | 14.3 |
| 184 | 12v-03-Anticuboh — fe2c4 — 1216  | -3221.549111 | 14.3 |
| 185 | 12v-03-Anticuboh — fe2c4 — 1212  | -3221.549096 | 14.3 |
| 186 | 12v-03-Anticuboh — fe2c4 — 1798  | -3221.549075 | 14.3 |
| 187 | 12v-03-Anticuboh — fe2c4 — 1805  | -3221.549075 | 14.3 |
| 188 | 12v-03-Anticuboh — fe2c4 — 1077  | -3221.549072 | 14.3 |
| 189 | 12v-02-Cuboctaedru — fe2c4 — 426 | -3221.549012 | 14.4 |
| 190 | 12v-03-Anticuboh — fe2c4 — 1417  | -3221.548986 | 14.4 |
| 191 | 12v-03-Anticuboh — fe2c4 — 1424  | -3221.548986 | 14.4 |
| 192 | 12v-03-Anticuboh — fe2c4 — 1213  | -3221.548984 | 14.4 |
| 193 | 12v-03-Anticuboh — fe2c4 — 1059  | -3221.548946 | 14.4 |
| 194 | 12v-02-Cuboctaedru — fe2c4 — 560 | -3221.548938 | 14.4 |
| 195 | 12v-02-Cuboctaedru — fe2c4 — 615 | -3221.548938 | 14.4 |
| 196 | 12v-02-Cuboctaedru — fe2c4 — 858 | -3221.548914 | 14.4 |
| 197 | 12v-02-Cuboctaedru — fe2c4 — 266 | -3221.548913 | 14.4 |
| 198 | 12v-03-Anticuboh — fe2c4 — 1440  | -3221.548873 | 14.4 |
| 199 | 12v-03-Anticuboh — fe2c4 — 1086  | -3221.548862 | 14.4 |
| 200 | 12v-03-Anticuboh — fe2c4 — 1349  | -3221.548854 | 14.5 |
| 201 | 12v-03-Anticuboh — fe2c4 — 1356  | -3221.548854 | 14.5 |

|     |                                  |              |      |
|-----|----------------------------------|--------------|------|
| 202 | 12v-03-Anticuboh — fe2c4 — 1412  | -3221.548854 | 14.5 |
| 203 | 12v-02-Cuboctaedru — fe2c4 — 385 | -3221.548832 | 14.5 |
| 204 | 12v-03-Anticuboh — fe2c4 — 1430  | -3221.54883  | 14.5 |
| 205 | 12v-03-Anticuboh — fe2c4 — 1383  | -3221.548829 | 14.5 |
| 206 | 12v-01-Icos — fe2c4 — 134        | -3221.548824 | 14.5 |
| 207 | 12v-01-Icos — fe2c4 — 51         | -3221.548824 | 14.5 |
| 208 | 12v-03-Anticuboh — fe2c4 — 1038  | -3221.548811 | 14.5 |
| 209 | 12v-02-Cuboctaedru — fe2c4 — 556 | -3221.548801 | 14.5 |
| 210 | 12v-02-Cuboctaedru — fe2c4 — 712 | -3221.548801 | 14.5 |
| 211 | 12v-02-Cuboctaedru — fe2c4 — 719 | -3221.548801 | 14.5 |
| 212 | 12v-03-Anticuboh — fe2c4 — 1046  | -3221.548749 | 14.5 |
| 213 | 12v-03-Anticuboh — fe2c4 — 1082  | -3221.548749 | 14.5 |
| 214 | 12v-01-Icos — fe2c4 — 87         | -3221.548712 | 14.5 |
| 215 | 12v-01-Icos — fe2c4 — 93         | -3221.548712 | 14.5 |
| 216 | 12v-03-Anticuboh — fe2c4 — 1495  | -3221.548707 | 14.5 |
| 217 | 12v-03-Anticuboh — fe2c4 — 1586  | -3221.548707 | 14.5 |
| 218 | 12v-03-Anticuboh — fe2c4 — 1600  | -3221.548707 | 14.5 |
| 219 | 12v-03-Anticuboh — fe2c4 — 1112  | -3221.548672 | 14.6 |
| 220 | 12v-03-Anticuboh — fe2c4 — 1042  | -3221.548669 | 14.6 |
| 221 | 12v-03-Anticuboh — fe2c4 — 1049  | -3221.548669 | 14.6 |
| 222 | 12v-03-Anticuboh — fe2c4 — 1090  | -3221.548669 | 14.6 |
| 223 | 12v-03-Anticuboh — fe2c4 — 1109  | -3221.548503 | 14.7 |
| 224 | 12v-01-Icos — fe2c4 — 113        | -3221.548473 | 14.7 |
| 225 | 12v-01-Icos — fe2c4 — 68         | -3221.548473 | 14.7 |
| 226 | 12v-01-Icos — fe2c4 — 48         | -3221.548389 | 14.7 |
| 227 | 12v-01-Icos — fe2c4 — 41         | -3221.548346 | 14.8 |
| 228 | 12v-01-Icos — fe2c4 — 57         | -3221.548346 | 14.8 |
| 229 | 12v-01-Icos — fe2c4 — 61         | -3221.548329 | 14.8 |
| 230 | 12v-03-Anticuboh — fe2c4 — 1291  | -3221.548085 | 14.9 |
| 231 | 12v-03-Anticuboh — fe2c4 — 1460  | -3221.547885 | 15.1 |
| 232 | 12v-03-Anticuboh — fe2c4 — 1523  | -3221.547885 | 15.1 |
| 233 | 12v-03-Anticuboh — fe2c4 — 1579  | -3221.547885 | 15.1 |
| 234 | 12v-03-Anticuboh — fe2c4 — 1607  | -3221.547885 | 15.1 |
| 235 | 12v-02-Cuboctaedru — fe2c4 — 263 | -3221.54787  | 15.1 |
| 236 | 12v-02-Cuboctaedru — fe2c4 — 307 | -3221.54787  | 15.1 |
| 237 | 12v-02-Cuboctaedru — fe2c4 — 361 | -3221.547855 | 15.1 |
| 238 | 12v-02-Cuboctaedru — fe2c4 — 368 | -3221.547855 | 15.1 |
| 239 | 12v-03-Anticuboh — fe2c4 — 1529  | -3221.547728 | 15.2 |
| 240 | 12v-03-Anticuboh — fe2c4 — 1576  | -3221.547728 | 15.2 |
| 241 | 12v-02-Cuboctaedru — fe2c4 — 333 | -3221.54761  | 15.2 |
| 242 | 12v-02-Cuboctaedru — fe2c4 — 340 | -3221.54761  | 15.2 |
| 243 | 12v-02-Cuboctaedru — fe2c4 — 272 | -3221.547555 | 15.3 |
| 244 | 12v-02-Cuboctaedru — fe2c4 — 329 | -3221.547555 | 15.3 |
| 245 | 12v-01-Icos — fe2c4 — 16         | -3221.547552 | 15.3 |
| 246 | 12v-02-Cuboctaedru — fe2c4 — 967 | -3221.54752  | 15.3 |
| 247 | 12v-02-Cuboctaedru — fe2c4 — 261 | -3221.547494 | 15.3 |
| 248 | 12v-02-Cuboctaedru — fe2c4 — 991 | -3221.547489 | 15.3 |
| 249 | 12v-03-Anticuboh — fe2c4 — 1116  | -3221.547488 | 15.3 |
| 250 | 12v-03-Anticuboh — fe2c4 — 1123  | -3221.547488 | 15.3 |
| 251 | 12v-03-Anticuboh — fe2c4 — 1181  | -3221.547461 | 15.3 |
| 252 | 12v-03-Anticuboh — fe2c4 — 1126  | -3221.54746  | 15.3 |

|     |                                  |              |      |
|-----|----------------------------------|--------------|------|
| 253 | 12v-01-Icos — fe2c4 — 35         | -3221.547451 | 15.3 |
| 254 | 12v-01-Icos — fe2c4 — 4          | -3221.547451 | 15.3 |
| 255 | 12v-02-Cuboctaedru — fe2c4 — 943 | -3221.547414 | 15.4 |
| 256 | 12v-02-Cuboctaedru — fe2c4 — 987 | -3221.547414 | 15.4 |
| 257 | 12v-03-Anticuboh — fe2c4 — 1196  | -3221.547414 | 15.4 |
| 258 | 12v-02-Cuboctaedru — fe2c4 — 274 | -3221.547325 | 15.4 |
| 259 | 12v-03-Anticuboh — fe2c4 — 1128  | -3221.547254 | 15.5 |
| 260 | 12v-03-Anticuboh — fe2c4 — 1542  | -3221.547007 | 15.6 |
| 261 | 12v-03-Anticuboh — fe2c4 — 1386  | -3221.546932 | 15.7 |
| 262 | 12v-02-Cuboctaedru — fe2c4 — 962 | -3221.546915 | 15.7 |
| 263 | 12v-03-Anticuboh — fe2c4 — 1464  | -3221.546877 | 15.7 |
| 264 | 12v-03-Anticuboh — fe2c4 — 1515  | -3221.546872 | 15.7 |
| 265 | 12v-03-Anticuboh — fe2c4 — 1508  | -3221.546871 | 15.7 |
| 266 | 12v-01-Icos — fe2c4 — 114        | -3221.546802 | 15.7 |
| 267 | 12v-01-Icos — fe2c4 — 89         | -3221.546802 | 15.7 |
| 268 | 12v-03-Anticuboh — fe2c4 — 1362  | -3221.546681 | 15.8 |
| 269 | 12v-03-Anticuboh — fe2c4 — 1432  | -3221.546681 | 15.8 |
| 270 | 12v-02-Cuboctaedru — fe2c4 — 259 | -3221.546629 | 15.8 |
| 271 | 12v-02-Cuboctaedru — fe2c4 — 287 | -3221.546629 | 15.8 |
| 272 | 12v-03-Anticuboh — fe2c4 — 1085  | -3221.546582 | 15.9 |
| 273 | 12v-03-Anticuboh — fe2c4 — 1017  | -3221.546569 | 15.9 |
| 274 | 12v-03-Anticuboh — fe2c4 — 1094  | -3221.546569 | 15.9 |
| 275 | 12v-03-Anticuboh — fe2c4 — 1020  | -3221.546557 | 15.9 |
| 276 | 12v-03-Anticuboh — fe2c4 — 1048  | -3221.546557 | 15.9 |
| 277 | 12v-03-Anticuboh — fe2c4 — 1097  | -3221.546557 | 15.9 |
| 278 | 12v-01-Icos — fe2c4 — 107        | -3221.546552 | 15.9 |
| 279 | 12v-01-Icos — fe2c4 — 90         | -3221.546552 | 15.9 |
| 280 | 12v-03-Anticuboh — fe2c4 — 1467  | -3221.546525 | 15.9 |
| 281 | 12v-03-Anticuboh — fe2c4 — 1031  | -3221.54651  | 15.9 |
| 282 | 12v-03-Anticuboh — fe2c4 — 1101  | -3221.54651  | 15.9 |
| 283 | 12v-03-Anticuboh — fe2c4 — 1009  | -3221.546498 | 15.9 |
| 284 | 12v-03-Anticuboh — fe2c4 — 1110  | -3221.546423 | 16.0 |
| 285 | 12v-03-Anticuboh — fe2c4 — 1047  | -3221.546411 | 16.0 |
| 286 | 12v-01-Icos — fe2c4 — 59         | -3221.546258 | 16.1 |
| 287 | 12v-01-Icos — fe2c4 — 120        | -3221.54625  | 16.1 |
| 288 | 12v-01-Icos — fe2c4 — 55         | -3221.54625  | 16.1 |
| 289 | 12v-01-Icos — fe2c4 — 58         | -3221.54625  | 16.1 |
| 290 | 12v-01-Icos — fe2c4 — 54         | -3221.546142 | 16.2 |
| 291 | 12v-01-Icos — fe2c4 — 81         | -3221.546089 | 16.2 |
| 292 | 12v-01-Icos — fe2c4 — 98         | -3221.546089 | 16.2 |
| 293 | 12v-02-Cuboctaedru — fe2c4 — 471 | -3221.546046 | 16.2 |
| 294 | 12v-02-Cuboctaedru — fe2c4 — 485 | -3221.546046 | 16.2 |
| 295 | 12v-02-Cuboctaedru — fe2c4 — 535 | -3221.54599  | 16.2 |
| 296 | 12v-02-Cuboctaedru — fe2c4 — 553 | -3221.54599  | 16.2 |
| 297 | 12v-02-Cuboctaedru — fe2c4 — 651 | -3221.54599  | 16.2 |
| 298 | 12v-02-Cuboctaedru — fe2c4 — 665 | -3221.54599  | 16.2 |
| 299 | 12v-02-Cuboctaedru — fe2c4 — 798 | -3221.54599  | 16.2 |
| 300 | 12v-03-Anticuboh — fe2c4 — 1111  | -3221.545977 | 16.3 |
| 301 | 12v-03-Anticuboh — fe2c4 — 1282  | -3221.545896 | 16.3 |
| 302 | 12v-02-Cuboctaedru — fe2c4 — 268 | -3221.545874 | 16.3 |
| 303 | 12v-02-Cuboctaedru — fe2c4 — 591 | -3221.545868 | 16.3 |

|     |                                  |              |      |
|-----|----------------------------------|--------------|------|
| 304 | 12v-01-Icos — fe2c4 — 5          | -3221.545824 | 16.4 |
| 305 | 12v-01-Icos — fe2c4 — 20         | -3221.545806 | 16.4 |
| 306 | 12v-02-Cuboctaedru — fe2c4 — 331 | -3221.545781 | 16.4 |
| 307 | 12v-02-Cuboctaedru — fe2c4 — 373 | -3221.545781 | 16.4 |
| 308 | 12v-02-Cuboctaedru — fe2c4 — 370 | -3221.545771 | 16.4 |
| 309 | 12v-02-Cuboctaedru — fe2c4 — 339 | -3221.545768 | 16.4 |
| 310 | 12v-02-Cuboctaedru — fe2c4 — 347 | -3221.545768 | 16.4 |
| 311 | 12v-02-Cuboctaedru — fe2c4 — 354 | -3221.545768 | 16.4 |
| 312 | 12v-01-Icos — fe2c4 — 34         | -3221.545761 | 16.4 |
| 313 | 12v-02-Cuboctaedru — fe2c4 — 985 | -3221.545726 | 16.4 |
| 314 | 12v-02-Cuboctaedru — fe2c4 — 971 | -3221.545723 | 16.4 |
| 315 | 12v-02-Cuboctaedru — fe2c4 — 265 | -3221.545684 | 16.4 |
| 316 | 12v-02-Cuboctaedru — fe2c4 — 328 | -3221.545684 | 16.4 |
| 317 | 12v-02-Cuboctaedru — fe2c4 — 275 | -3221.545677 | 16.4 |
| 318 | 12v-02-Cuboctaedru — fe2c4 — 296 | -3221.545627 | 16.5 |
| 319 | 12v-02-Cuboctaedru — fe2c4 — 344 | -3221.545627 | 16.5 |
| 320 | 12v-02-Cuboctaedru — fe2c4 — 351 | -3221.545627 | 16.5 |
| 321 | 12v-03-Anticuboh — fe2c4 — 1153  | -3221.545536 | 16.5 |
| 322 | 12v-03-Anticuboh — fe2c4 — 1119  | -3221.545535 | 16.5 |
| 323 | 12v-02-Cuboctaedru — fe2c4 — 298 | -3221.545416 | 16.6 |
| 324 | 12v-03-Anticuboh — fe2c4 — 1549  | -3221.545409 | 16.6 |
| 325 | 12v-03-Anticuboh — fe2c4 — 1535  | -3221.545402 | 16.6 |
| 326 | 12v-03-Anticuboh — fe2c4 — 1132  | -3221.545396 | 16.6 |
| 327 | 12v-02-Cuboctaedru — fe2c4 — 376 | -3221.54531  | 16.7 |
| 328 | 12v-03-Anticuboh — fe2c4 — 1556  | -3221.545296 | 16.7 |
| 329 | 12v-02-Cuboctaedru — fe2c4 — 369 | -3221.545293 | 16.7 |
| 330 | 12v-03-Anticuboh — fe2c4 — 1604  | -3221.545154 | 16.8 |
| 331 | 12v-03-Anticuboh — fe2c4 — 1614  | -3221.545154 | 16.8 |
| 332 | 12v-03-Anticuboh — fe2c4 — 1739  | -3221.54503  | 16.9 |
| 333 | 12v-03-Anticuboh — fe2c4 — 1545  | -3221.544756 | 17.0 |
| 334 | 12v-03-Anticuboh — fe2c4 — 1568  | -3221.544756 | 17.0 |
| 335 | 12v-03-Anticuboh — fe2c4 — 1589  | -3221.544756 | 17.0 |
| 336 | 12v-03-Anticuboh — fe2c4 — 1596  | -3221.544756 | 17.0 |
| 337 | 12v-03-Anticuboh — fe2c4 — 1603  | -3221.544756 | 17.0 |
| 338 | 12v-02-Cuboctaedru — fe2c4 — 989 | -3221.544648 | 17.1 |
| 339 | 12v-02-Cuboctaedru — fe2c4 — 932 | -3221.544516 | 17.2 |
| 340 | 12v-02-Cuboctaedru — fe2c4 — 271 | -3221.544359 | 17.3 |
| 341 | 12v-02-Cuboctaedru — fe2c4 — 315 | -3221.544359 | 17.3 |
| 342 | 12v-02-Cuboctaedru — fe2c4 — 256 | -3221.544337 | 17.3 |
| 343 | 12v-02-Cuboctaedru — fe2c4 — 336 | -3221.544336 | 17.3 |
| 344 | 12v-01-Icos — fe2c4 — 31         | -3221.544331 | 17.3 |
| 345 | 12v-03-Anticuboh — fe2c4 — 1135  | -3221.544232 | 17.4 |
| 346 | 12v-03-Anticuboh — fe2c4 — 1163  | -3221.544232 | 17.4 |
| 347 | 12v-02-Cuboctaedru — fe2c4 — 299 | -3221.544227 | 17.4 |
| 348 | 12v-02-Cuboctaedru — fe2c4 — 314 | -3221.544204 | 17.4 |
| 349 | 12v-02-Cuboctaedru — fe2c4 — 264 | -3221.544161 | 17.4 |
| 350 | 12v-03-Anticuboh — fe2c4 — 1161  | -3221.544086 | 17.4 |
| 351 | 12v-03-Anticuboh — fe2c4 — 1157  | -3221.544034 | 17.5 |
| 352 | 12v-02-Cuboctaedru — fe2c4 — 377 | -3221.54397  | 17.5 |
| 353 | 12v-02-Cuboctaedru — fe2c4 — 653 | -3221.543963 | 17.5 |
| 354 | 12v-02-Cuboctaedru — fe2c4 — 366 | -3221.543955 | 17.5 |

|     |                                  |              |      |
|-----|----------------------------------|--------------|------|
| 355 | 12v-01-Icos — fe2c4 — 23         | -3221.543937 | 17.5 |
| 356 | 12v-01-Icos — fe2c4 — 9          | -3221.543937 | 17.5 |
| 357 | 12v-03-Anticuboh — fe2c4 — 1506  | -3221.543883 | 17.6 |
| 358 | 12v-03-Anticuboh — fe2c4 — 1513  | -3221.543883 | 17.6 |
| 359 | 12v-02-Cuboctaedru — fe2c4 — 375 | -3221.543754 | 17.7 |
| 360 | 12v-03-Anticuboh — fe2c4 — 1193  | -3221.543555 | 17.8 |
| 361 | 12v-03-Anticuboh — fe2c4 — 1202  | -3221.543531 | 17.8 |
| 362 | 12v-02-Cuboctaedru — fe2c4 — 260 | -3221.543529 | 17.8 |
| 363 | 12v-03-Anticuboh — fe2c4 — 1744  | -3221.54333  | 17.9 |
| 364 | 12v-03-Anticuboh — fe2c4 — 1773  | -3221.54333  | 17.9 |
| 365 | 12v-03-Anticuboh — fe2c4 — 1540  | -3221.543203 | 18.0 |
| 366 | 12v-02-Cuboctaedru — fe2c4 — 392 | -3221.543032 | 18.1 |
| 367 | 12v-03-Anticuboh — fe2c4 — 1005  | -3221.542989 | 18.1 |
| 368 | 12v-02-Cuboctaedru — fe2c4 — 427 | -3221.542947 | 18.2 |
| 369 | 12v-03-Anticuboh — fe2c4 — 1410  | -3221.542944 | 18.2 |
| 370 | 12v-03-Anticuboh — fe2c4 — 1438  | -3221.542927 | 18.2 |
| 371 | 12v-03-Anticuboh — fe2c4 — 1370  | -3221.542894 | 18.2 |
| 372 | 12v-03-Anticuboh — fe2c4 — 1414  | -3221.542894 | 18.2 |
| 373 | 12v-03-Anticuboh — fe2c4 — 1433  | -3221.542894 | 18.2 |
| 374 | 12v-03-Anticuboh — fe2c4 — 1442  | -3221.542894 | 18.2 |
| 375 | 12v-02-Cuboctaedru — fe2c4 — 669 | -3221.542837 | 18.2 |
| 376 | 12v-02-Cuboctaedru — fe2c4 — 677 | -3221.542837 | 18.2 |
| 377 | 12v-02-Cuboctaedru — fe2c4 — 818 | -3221.542837 | 18.2 |
| 378 | 12v-03-Anticuboh — fe2c4 — 1507  | -3221.542709 | 18.3 |
| 379 | 12v-03-Anticuboh — fe2c4 — 1514  | -3221.542709 | 18.3 |
| 380 | 12v-01-Icos — fe2c4 — 140        | -3221.542701 | 18.3 |
| 381 | 12v-03-Anticuboh — fe2c4 — 1471  | -3221.54268  | 18.3 |
| 382 | 12v-01-Icos — fe2c4 — 135        | -3221.542664 | 18.3 |
| 383 | 12v-02-Cuboctaedru — fe2c4 — 254 | -3221.542644 | 18.3 |
| 384 | 12v-02-Cuboctaedru — fe2c4 — 317 | -3221.542644 | 18.3 |
| 385 | 12v-01-Icos — fe2c4 — 186        | -3221.542551 | 18.4 |
| 386 | 12v-01-Icos — fe2c4 — 203        | -3221.542551 | 18.4 |
| 387 | 12v-01-Icos — fe2c4 — 7          | -3221.542514 | 18.4 |
| 388 | 12v-01-Icos — fe2c4 — 19         | -3221.542509 | 18.4 |
| 389 | 12v-02-Cuboctaedru — fe2c4 — 970 | -3221.542507 | 18.4 |
| 390 | 12v-02-Cuboctaedru — fe2c4 — 936 | -3221.542506 | 18.4 |
| 391 | 12v-02-Cuboctaedru — fe2c4 — 255 | -3221.542424 | 18.5 |
| 392 | 12v-02-Cuboctaedru — fe2c4 — 350 | -3221.542424 | 18.5 |
| 393 | 12v-02-Cuboctaedru — fe2c4 — 357 | -3221.542424 | 18.5 |
| 394 | 12v-02-Cuboctaedru — fe2c4 — 313 | -3221.542408 | 18.5 |
| 395 | 12v-02-Cuboctaedru — fe2c4 — 327 | -3221.542408 | 18.5 |
| 396 | 12v-02-Cuboctaedru — fe2c4 — 276 | -3221.542407 | 18.5 |
| 397 | 12v-02-Cuboctaedru — fe2c4 — 348 | -3221.542407 | 18.5 |
| 398 | 12v-02-Cuboctaedru — fe2c4 — 355 | -3221.542407 | 18.5 |
| 399 | 12v-03-Anticuboh — fe2c4 — 1145  | -3221.542268 | 18.6 |
| 400 | 12v-03-Anticuboh — fe2c4 — 1173  | -3221.542267 | 18.6 |
| 401 | 12v-02-Cuboctaedru — fe2c4 — 382 | -3221.542257 | 18.6 |
| 402 | 12v-02-Cuboctaedru — fe2c4 — 447 | -3221.542257 | 18.6 |
| 403 | 12v-03-Anticuboh — fe2c4 — 1494  | -3221.542257 | 18.6 |
| 404 | 12v-03-Anticuboh — fe2c4 — 1557  | -3221.542257 | 18.6 |
| 405 | 12v-03-Anticuboh — fe2c4 — 1104  | -3221.542202 | 18.6 |

|     |                                  |              |      |
|-----|----------------------------------|--------------|------|
| 406 | 12v-03-Anticuboh — fe2c4 — 1099  | -3221.542201 | 18.6 |
| 407 | 12v-03-Anticuboh — fe2c4 — 1006  | -3221.542199 | 18.6 |
| 408 | 12v-03-Anticuboh — fe2c4 — 1034  | -3221.542199 | 18.6 |
| 409 | 12v-03-Anticuboh — fe2c4 — 1022  | -3221.542172 | 18.6 |
| 410 | 12v-03-Anticuboh — fe2c4 — 1013  | -3221.542167 | 18.6 |
| 411 | 12v-02-Cuboctaedru — fe2c4 — 576 | -3221.542117 | 18.7 |
| 412 | 12v-03-Anticuboh — fe2c4 — 1587  | -3221.542116 | 18.7 |
| 413 | 12v-03-Anticuboh — fe2c4 — 1601  | -3221.542116 | 18.7 |
| 414 | 12v-03-Anticuboh — fe2c4 — 1610  | -3221.542116 | 18.7 |
| 415 | 12v-02-Cuboctaedru — fe2c4 — 532 | -3221.542111 | 18.7 |
| 416 | 12v-02-Cuboctaedru — fe2c4 — 537 | -3221.542111 | 18.7 |
| 417 | 12v-02-Cuboctaedru — fe2c4 — 658 | -3221.542111 | 18.7 |
| 418 | 12v-03-Anticuboh — fe2c4 — 1519  | -3221.54209  | 18.7 |
| 419 | 12v-03-Anticuboh — fe2c4 — 1574  | -3221.54206  | 18.7 |
| 420 | 12v-02-Cuboctaedru — fe2c4 — 574 | -3221.542058 | 18.7 |
| 421 | 12v-02-Cuboctaedru — fe2c4 — 584 | -3221.542058 | 18.7 |
| 422 | 12v-02-Cuboctaedru — fe2c4 — 650 | -3221.542058 | 18.7 |
| 423 | 12v-02-Cuboctaedru — fe2c4 — 693 | -3221.542058 | 18.7 |
| 424 | 12v-02-Cuboctaedru — fe2c4 — 797 | -3221.542058 | 18.7 |
| 425 | 12v-03-Anticuboh — fe2c4 — 1018  | -3221.542039 | 18.7 |
| 426 | 12v-03-Anticuboh — fe2c4 — 1095  | -3221.542024 | 18.7 |
| 427 | 12v-03-Anticuboh — fe2c4 — 1468  | -3221.542024 | 18.7 |
| 428 | 12v-03-Anticuboh — fe2c4 — 1512  | -3221.542024 | 18.7 |
| 429 | 12v-03-Anticuboh — fe2c4 — 1588  | -3221.542024 | 18.7 |
| 430 | 12v-03-Anticuboh — fe2c4 — 1602  | -3221.542024 | 18.7 |
| 431 | 12v-03-Anticuboh — fe2c4 — 1482  | -3221.541998 | 18.8 |
| 432 | 12v-03-Anticuboh — fe2c4 — 1575  | -3221.541988 | 18.8 |
| 433 | 12v-03-Anticuboh — fe2c4 — 1081  | -3221.541941 | 18.8 |
| 434 | 12v-02-Cuboctaedru — fe2c4 — 703 | -3221.541924 | 18.8 |
| 435 | 12v-02-Cuboctaedru — fe2c4 — 711 | -3221.541924 | 18.8 |
| 436 | 12v-02-Cuboctaedru — fe2c4 — 718 | -3221.541924 | 18.8 |
| 437 | 12v-03-Anticuboh — fe2c4 — 1148  | -3221.541831 | 18.9 |
| 438 | 12v-03-Anticuboh — fe2c4 — 1155  | -3221.541825 | 18.9 |
| 439 | 12v-03-Anticuboh — fe2c4 — 1176  | -3221.541825 | 18.9 |
| 440 | 12v-03-Anticuboh — fe2c4 — 1183  | -3221.541825 | 18.9 |
| 441 | 12v-03-Anticuboh — fe2c4 — 1002  | -3221.541801 | 18.9 |
| 442 | 12v-03-Anticuboh — fe2c4 — 1339  | -3221.541742 | 18.9 |
| 443 | 12v-03-Anticuboh — fe2c4 — 1057  | -3221.541723 | 18.9 |
| 444 | 12v-03-Anticuboh — fe2c4 — 1066  | -3221.5417   | 18.9 |
| 445 | 12v-03-Anticuboh — fe2c4 — 1053  | -3221.541588 | 19.0 |
| 446 | 12v-03-Anticuboh — fe2c4 — 1067  | -3221.541566 | 19.0 |
| 447 | 12v-01-Icos — fe2c4 — 103        | -3221.541429 | 19.1 |
| 448 | 12v-01-Icos — fe2c4 — 115        | -3221.541429 | 19.1 |
| 449 | 12v-03-Anticuboh — fe2c4 — 1227  | -3221.541301 | 19.2 |
| 450 | 12v-03-Anticuboh — fe2c4 — 1546  | -3221.540491 | 19.7 |
| 451 | 12v-01-Icos — fe2c4 — 164        | -3221.540394 | 19.8 |
| 452 | 12v-01-Icos — fe2c4 — 171        | -3221.540394 | 19.8 |
| 453 | 12v-03-Anticuboh — fe2c4 — 1004  | -3221.540311 | 19.8 |
| 454 | 12v-02-Cuboctaedru — fe2c4 — 831 | -3221.540221 | 19.9 |
| 455 | 12v-03-Anticuboh — fe2c4 — 1660  | -3221.540188 | 19.9 |
| 456 | 12v-01-Icos — fe2c4 — 172        | -3221.540186 | 19.9 |

|     |                                  |              |      |
|-----|----------------------------------|--------------|------|
| 457 | 12v-01-Icos — fe2c4 — 251        | -3221.540136 | 19.9 |
| 458 | 12v-02-Cuboctaedru — fe2c4 — 557 | -3221.539803 | 20.1 |
| 459 | 12v-02-Cuboctaedru — fe2c4 — 600 | -3221.539803 | 20.1 |
| 460 | 12v-01-Icos — fe2c4 — 216        | -3221.539755 | 20.2 |
| 461 | 12v-03-Anticuboh — fe2c4 — 1203  | -3221.539656 | 20.2 |
| 462 | 12v-02-Cuboctaedru — fe2c4 — 533 | -3221.539627 | 20.2 |
| 463 | 12v-03-Anticuboh — fe2c4 — 1019  | -3221.539362 | 20.4 |
| 464 | 12v-03-Anticuboh — fe2c4 — 1096  | -3221.539359 | 20.4 |
| 465 | 12v-03-Anticuboh — fe2c4 — 1377  | -3221.53914  | 20.5 |
| 466 | 12v-03-Anticuboh — fe2c4 — 1421  | -3221.53914  | 20.5 |
| 467 | 12v-03-Anticuboh — fe2c4 — 1428  | -3221.53914  | 20.5 |
| 468 | 12v-03-Anticuboh — fe2c4 — 1435  | -3221.53914  | 20.5 |
| 469 | 12v-02-Cuboctaedru — fe2c4 — 509 | -3221.539054 | 20.6 |
| 470 | 12v-03-Anticuboh — fe2c4 — 1373  | -3221.539028 | 20.6 |
| 471 | 12v-03-Anticuboh — fe2c4 — 1076  | -3221.538994 | 20.6 |
| 472 | 12v-03-Anticuboh — fe2c4 — 1856  | -3221.538786 | 20.8 |
| 473 | 12v-01-Icos — fe2c4 — 121        | -3221.538697 | 20.8 |
| 474 | 12v-03-Anticuboh — fe2c4 — 1755  | -3221.537824 | 21.4 |
| 475 | 12v-03-Anticuboh — fe2c4 — 1736  | -3221.537806 | 21.4 |
| 476 | 12v-03-Anticuboh — fe2c4 — 1666  | -3221.537804 | 21.4 |
| 477 | 12v-03-Anticuboh — fe2c4 — 1818  | -3221.537733 | 21.4 |
| 478 | 12v-03-Anticuboh — fe2c4 — 1812  | -3221.537526 | 21.6 |
| 479 | 12v-02-Cuboctaedru — fe2c4 — 425 | -3221.53744  | 21.6 |
| 480 | 12v-03-Anticuboh — fe2c4 — 1741  | -3221.537339 | 21.7 |
| 481 | 12v-03-Anticuboh — fe2c4 — 1073  | -3221.537264 | 21.7 |
| 482 | 12v-03-Anticuboh — fe2c4 — 1463  | -3221.537136 | 21.8 |
| 483 | 12v-03-Anticuboh — fe2c4 — 1496  | -3221.537136 | 21.8 |
| 484 | 12v-03-Anticuboh — fe2c4 — 1526  | -3221.537136 | 21.8 |
| 485 | 12v-03-Anticuboh — fe2c4 — 1499  | -3221.53713  | 21.8 |
| 486 | 12v-03-Anticuboh — fe2c4 — 1528  | -3221.53713  | 21.8 |
| 487 | 12v-02-Cuboctaedru — fe2c4 — 649 | -3221.536894 | 22.0 |
| 488 | 12v-02-Cuboctaedru — fe2c4 — 749 | -3221.536894 | 22.0 |
| 489 | 12v-02-Cuboctaedru — fe2c4 — 796 | -3221.536894 | 22.0 |
| 490 | 12v-02-Cuboctaedru — fe2c4 — 801 | -3221.536894 | 22.0 |
| 491 | 12v-02-Cuboctaedru — fe2c4 — 812 | -3221.536894 | 22.0 |
| 492 | 12v-02-Cuboctaedru — fe2c4 — 578 | -3221.536649 | 22.1 |
| 493 | 12v-02-Cuboctaedru — fe2c4 — 697 | -3221.536649 | 22.1 |
| 494 | 12v-02-Cuboctaedru — fe2c4 — 782 | -3221.536649 | 22.1 |
| 495 | 12v-02-Cuboctaedru — fe2c4 — 410 | -3221.536556 | 22.2 |
| 496 | 12v-03-Anticuboh — fe2c4 — 1763  | -3221.5365   | 22.2 |
| 497 | 12v-03-Anticuboh — fe2c4 — 1832  | -3221.536453 | 22.2 |
| 498 | 12v-02-Cuboctaedru — fe2c4 — 466 | -3221.536371 | 22.3 |
| 499 | 12v-02-Cuboctaedru — fe2c4 — 640 | -3221.53633  | 22.3 |
| 500 | 12v-02-Cuboctaedru — fe2c4 — 752 | -3221.53633  | 22.3 |
| 501 | 12v-02-Cuboctaedru — fe2c4 — 759 | -3221.53633  | 22.3 |
| 502 | 12v-02-Cuboctaedru — fe2c4 — 773 | -3221.53633  | 22.3 |
| 503 | 12v-02-Cuboctaedru — fe2c4 — 780 | -3221.53633  | 22.3 |
| 504 | 12v-02-Cuboctaedru — fe2c4 — 822 | -3221.53633  | 22.3 |
| 505 | 12v-03-Anticuboh — fe2c4 — 1691  | -3221.536321 | 22.3 |
| 506 | 12v-03-Anticuboh — fe2c4 — 1726  | -3221.536321 | 22.3 |
| 507 | 12v-03-Anticuboh — fe2c4 — 1827  | -3221.536239 | 22.4 |

|     |                                  |              |      |
|-----|----------------------------------|--------------|------|
| 508 | 12v-02-Cuboctaedru — fe2c4 — 827 | -3221.536212 | 22.4 |
| 509 | 12v-02-Cuboctaedru — fe2c4 — 855 | -3221.53621  | 22.4 |
| 510 | 12v-03-Anticuboh — fe2c4 — 1839  | -3221.53611  | 22.4 |
| 511 | 12v-01-Icos — fe2c4 — 132        | -3221.536011 | 22.5 |
| 512 | 12v-03-Anticuboh — fe2c4 — 1541  | -3221.536011 | 22.5 |
| 513 | 12v-03-Anticuboh — fe2c4 — 1277  | -3221.535962 | 22.5 |
| 514 | 12v-01-Icos — fe2c4 — 111        | -3221.535932 | 22.6 |
| 515 | 12v-01-Icos — fe2c4 — 118        | -3221.535932 | 22.6 |
| 516 | 12v-01-Icos — fe2c4 — 131        | -3221.535932 | 22.6 |
| 517 | 12v-03-Anticuboh — fe2c4 — 1877  | -3221.535918 | 22.6 |
| 518 | 12v-03-Anticuboh — fe2c4 — 1899  | -3221.535918 | 22.6 |
| 519 | 12v-03-Anticuboh — fe2c4 — 1195  | -3221.535899 | 22.6 |
| 520 | 12v-02-Cuboctaedru — fe2c4 — 291 | -3221.535832 | 22.6 |
| 521 | 12v-03-Anticuboh — fe2c4 — 1826  | -3221.535816 | 22.6 |
| 522 | 12v-03-Anticuboh — fe2c4 — 1867  | -3221.535816 | 22.6 |
| 523 | 12v-02-Cuboctaedru — fe2c4 — 841 | -3221.535805 | 22.6 |
| 524 | 12v-02-Cuboctaedru — fe2c4 — 300 | -3221.535763 | 22.7 |
| 525 | 12v-03-Anticuboh — fe2c4 — 1292  | -3221.535677 | 22.7 |
| 526 | 12v-03-Anticuboh — fe2c4 — 1238  | -3221.535563 | 22.8 |
| 527 | 12v-03-Anticuboh — fe2c4 — 1245  | -3221.535563 | 22.8 |
| 528 | 12v-03-Anticuboh — fe2c4 — 1293  | -3221.535563 | 22.8 |
| 529 | 12v-03-Anticuboh — fe2c4 — 1315  | -3221.535563 | 22.8 |
| 530 | 12v-02-Cuboctaedru — fe2c4 — 928 | -3221.535409 | 22.9 |
| 531 | 12v-03-Anticuboh — fe2c4 — 1573  | -3221.535283 | 23.0 |
| 532 | 12v-03-Anticuboh — fe2c4 — 1616  | -3221.535283 | 23.0 |
| 533 | 12v-02-Cuboctaedru — fe2c4 — 526 | -3221.53522  | 23.0 |
| 534 | 12v-03-Anticuboh — fe2c4 — 1180  | -3221.535177 | 23.0 |
| 535 | 12v-03-Anticuboh — fe2c4 — 1152  | -3221.535173 | 23.0 |
| 536 | 12v-03-Anticuboh — fe2c4 — 1172  | -3221.535137 | 23.1 |
| 537 | 12v-03-Anticuboh — fe2c4 — 1144  | -3221.535134 | 23.1 |
| 538 | 12v-01-Icos — fe2c4 — 157        | -3221.534494 | 23.5 |
| 539 | 12v-01-Icos — fe2c4 — 166        | -3221.534494 | 23.5 |
| 540 | 12v-01-Icos — fe2c4 — 198        | -3221.534494 | 23.5 |
| 541 | 12v-02-Cuboctaedru — fe2c4 — 606 | -3221.534316 | 23.6 |
| 542 | 12v-02-Cuboctaedru — fe2c4 — 814 | -3221.534316 | 23.6 |
| 543 | 12v-01-Icos — fe2c4 — 202        | -3221.534274 | 23.6 |
| 544 | 12v-02-Cuboctaedru — fe2c4 — 992 | -3221.53416  | 23.7 |
| 545 | 12v-02-Cuboctaedru — fe2c4 — 907 | -3221.534127 | 23.7 |
| 546 | 12v-03-Anticuboh — fe2c4 — 998   | -3221.53407  | 23.7 |
| 547 | 12v-03-Anticuboh — fe2c4 — 1026  | -3221.534067 | 23.7 |
| 548 | 12v-03-Anticuboh — fe2c4 — 1065  | -3221.533965 | 23.8 |
| 549 | 12v-01-Icos — fe2c4 — 129        | -3221.533793 | 23.9 |
| 550 | 12v-03-Anticuboh — fe2c4 — 1664  | -3221.533684 | 24.0 |
| 551 | 12v-03-Anticuboh — fe2c4 — 1693  | -3221.533684 | 24.0 |
| 552 | 12v-02-Cuboctaedru — fe2c4 — 483 | -3221.533547 | 24.1 |
| 553 | 12v-02-Cuboctaedru — fe2c4 — 596 | -3221.533397 | 24.2 |
| 554 | 12v-02-Cuboctaedru — fe2c4 — 617 | -3221.533397 | 24.2 |
| 555 | 12v-02-Cuboctaedru — fe2c4 — 726 | -3221.533187 | 24.3 |
| 556 | 12v-02-Cuboctaedru — fe2c4 — 516 | -3221.533133 | 24.3 |
| 557 | 12v-02-Cuboctaedru — fe2c4 — 531 | -3221.533133 | 24.3 |
| 558 | 12v-02-Cuboctaedru — fe2c4 — 580 | -3221.533133 | 24.3 |



|     |                                  |              |      |
|-----|----------------------------------|--------------|------|
| 559 | 12v-01-Icos — fe2c4 — 38         | -3221.533036 | 24.4 |
| 560 | 12v-01-Icos — fe2c4 — 64         | -3221.533036 | 24.4 |
| 561 | 12v-01-Icos — fe2c4 — 85         | -3221.533036 | 24.4 |
| 562 | 12v-01-Icos — fe2c4 — 47         | -3221.533018 | 24.4 |
| 563 | 12v-02-Cuboctaedru — fe2c4 — 571 | -3221.532944 | 24.4 |
| 564 | 12v-02-Cuboctaedru — fe2c4 — 577 | -3221.532944 | 24.4 |
| 565 | 12v-02-Cuboctaedru — fe2c4 — 642 | -3221.532944 | 24.4 |
| 566 | 12v-02-Cuboctaedru — fe2c4 — 690 | -3221.532944 | 24.4 |
| 567 | 12v-02-Cuboctaedru — fe2c4 — 775 | -3221.532944 | 24.4 |
| 568 | 12v-03-Anticuboh — fe2c4 — 1000  | -3221.532913 | 24.5 |
| 569 | 12v-03-Anticuboh — fe2c4 — 1636  | -3221.532772 | 24.5 |
| 570 | 12v-03-Anticuboh — fe2c4 — 1770  | -3221.532772 | 24.5 |
| 571 | 12v-03-Anticuboh — fe2c4 — 1791  | -3221.532772 | 24.5 |
| 572 | 12v-03-Anticuboh — fe2c4 — 1028  | -3221.532762 | 24.5 |
| 573 | 12v-03-Anticuboh — fe2c4 — 1024  | -3221.532692 | 24.6 |
| 574 | 12v-03-Anticuboh — fe2c4 — 1023  | -3221.532618 | 24.6 |
| 575 | 12v-03-Anticuboh — fe2c4 — 995   | -3221.532618 | 24.6 |
| 576 | 12v-03-Anticuboh — fe2c4 — 996   | -3221.53259  | 24.7 |
| 577 | 12v-01-Icos — fe2c4 — 125        | -3221.532574 | 24.7 |
| 578 | 12v-01-Icos — fe2c4 — 130        | -3221.532574 | 24.7 |
| 579 | 12v-03-Anticuboh — fe2c4 — 1698  | -3221.532513 | 24.7 |
| 580 | 12v-03-Anticuboh — fe2c4 — 1088  | -3221.532457 | 24.7 |
| 581 | 12v-03-Anticuboh — fe2c4 — 1688  | -3221.532457 | 24.7 |
| 582 | 12v-03-Anticuboh — fe2c4 — 1775  | -3221.532457 | 24.7 |
| 583 | 12v-03-Anticuboh — fe2c4 — 1220  | -3221.532445 | 24.7 |
| 584 | 12v-03-Anticuboh — fe2c4 — 1027  | -3221.532424 | 24.8 |
| 585 | 12v-03-Anticuboh — fe2c4 — 999   | -3221.532424 | 24.8 |
| 586 | 12v-03-Anticuboh — fe2c4 — 1228  | -3221.532349 | 24.8 |
| 587 | 12v-02-Cuboctaedru — fe2c4 — 619 | -3221.532334 | 24.8 |
| 588 | 12v-02-Cuboctaedru — fe2c4 — 731 | -3221.532334 | 24.8 |
| 589 | 12v-02-Cuboctaedru — fe2c4 — 738 | -3221.532334 | 24.8 |
| 590 | 12v-03-Anticuboh — fe2c4 — 1219  | -3221.532233 | 24.9 |
| 591 | 12v-01-Icos — fe2c4 — 72         | -3221.532045 | 25.0 |
| 592 | 12v-01-Icos — fe2c4 — 88         | -3221.532045 | 25.0 |
| 593 | 12v-03-Anticuboh — fe2c4 — 1087  | -3221.532011 | 25.0 |
| 594 | 12v-02-Cuboctaedru — fe2c4 — 565 | -3221.53199  | 25.0 |
| 595 | 12v-03-Anticuboh — fe2c4 — 1828  | -3221.531976 | 25.0 |
| 596 | 12v-03-Anticuboh — fe2c4 — 1850  | -3221.531976 | 25.0 |
| 597 | 12v-03-Anticuboh — fe2c4 — 1901  | -3221.531976 | 25.0 |
| 598 | 12v-01-Icos — fe2c4 — 77         | -3221.531911 | 25.1 |
| 599 | 12v-01-Icos — fe2c4 — 82         | -3221.531911 | 25.1 |
| 600 | 12v-02-Cuboctaedru — fe2c4 — 585 | -3221.531876 | 25.1 |
| 601 | 12v-02-Cuboctaedru — fe2c4 — 700 | -3221.531864 | 25.1 |
| 602 | 12v-02-Cuboctaedru — fe2c4 — 790 | -3221.531864 | 25.1 |
| 603 | 12v-02-Cuboctaedru — fe2c4 — 966 | -3221.531844 | 25.1 |
| 604 | 12v-03-Anticuboh — fe2c4 — 1236  | -3221.531837 | 25.1 |
| 605 | 12v-03-Anticuboh — fe2c4 — 1313  | -3221.531837 | 25.1 |
| 606 | 12v-03-Anticuboh — fe2c4 — 1854  | -3221.531651 | 25.2 |
| 607 | 12v-03-Anticuboh — fe2c4 — 1243  | -3221.531639 | 25.3 |
| 608 | 12v-03-Anticuboh — fe2c4 — 1855  | -3221.531623 | 25.3 |
| 609 | 12v-03-Anticuboh — fe2c4 — 1146  | -3221.531516 | 25.3 |

|     |                                  |              |      |
|-----|----------------------------------|--------------|------|
| 610 | 12v-03-Anticuboh — fe2c4 — 1130  | -3221.531478 | 25.4 |
| 611 | 12v-03-Anticuboh — fe2c4 — 1484  | -3221.531474 | 25.4 |
| 612 | 12v-03-Anticuboh — fe2c4 — 1197  | -3221.531462 | 25.4 |
| 613 | 12v-03-Anticuboh — fe2c4 — 1120  | -3221.531415 | 25.4 |
| 614 | 12v-03-Anticuboh — fe2c4 — 1134  | -3221.531403 | 25.4 |
| 615 | 12v-03-Anticuboh — fe2c4 — 1127  | -3221.531395 | 25.4 |
| 616 | 12v-03-Anticuboh — fe2c4 — 1174  | -3221.531395 | 25.4 |
| 617 | 12v-02-Cuboctaedru — fe2c4 — 396 | -3221.531362 | 25.4 |
| 618 | 12v-03-Anticuboh — fe2c4 — 1117  | -3221.531277 | 25.5 |
| 619 | 12v-03-Anticuboh — fe2c4 — 1124  | -3221.531277 | 25.5 |
| 620 | 12v-03-Anticuboh — fe2c4 — 1493  | -3221.531202 | 25.5 |
| 621 | 12v-03-Anticuboh — fe2c4 — 1504  | -3221.531188 | 25.5 |
| 622 | 12v-02-Cuboctaedru — fe2c4 — 424 | -3221.531177 | 25.5 |
| 623 | 12v-03-Anticuboh — fe2c4 — 1800  | -3221.531137 | 25.6 |
| 624 | 12v-03-Anticuboh — fe2c4 — 1852  | -3221.531137 | 25.6 |
| 625 | 12v-03-Anticuboh — fe2c4 — 1845  | -3221.531132 | 25.6 |
| 626 | 12v-03-Anticuboh — fe2c4 — 1793  | -3221.531113 | 25.6 |
| 627 | 12v-03-Anticuboh — fe2c4 — 1640  | -3221.531117 | 25.6 |
| 628 | 12v-03-Anticuboh — fe2c4 — 1641  | -3221.531008 | 25.6 |
| 629 | 12v-03-Anticuboh — fe2c4 — 1706  | -3221.531008 | 25.6 |
| 630 | 12v-01-Icos — fe2c4 — 39         | -3221.530923 | 25.7 |
| 631 | 12v-02-Cuboctaedru — fe2c4 — 724 | -3221.530847 | 25.8 |
| 632 | 12v-02-Cuboctaedru — fe2c4 — 732 | -3221.530847 | 25.8 |
| 633 | 12v-02-Cuboctaedru — fe2c4 — 739 | -3221.530846 | 25.8 |
| 634 | 12v-01-Icos — fe2c4 — 46         | -3221.530835 | 25.8 |
| 635 | 12v-01-Icos — fe2c4 — 70         | -3221.530835 | 25.8 |
| 636 | 12v-01-Icos — fe2c4 — 78         | -3221.530835 | 25.8 |
| 637 | 12v-02-Cuboctaedru — fe2c4 — 253 | -3221.530734 | 25.8 |
| 638 | 12v-03-Anticuboh — fe2c4 — 1485  | -3221.530734 | 25.8 |
| 639 | 12v-03-Anticuboh — fe2c4 — 1571  | -3221.530734 | 25.8 |
| 640 | 12v-03-Anticuboh — fe2c4 — 1835  | -3221.530596 | 25.9 |
| 641 | 12v-03-Anticuboh — fe2c4 — 1851  | -3221.530595 | 25.9 |
| 642 | 12v-03-Anticuboh — fe2c4 — 1264  | -3221.530591 | 25.9 |
| 643 | 12v-03-Anticuboh — fe2c4 — 1208  | -3221.53059  | 25.9 |
| 644 | 12v-03-Anticuboh — fe2c4 — 1215  | -3221.53059  | 25.9 |
| 645 | 12v-03-Anticuboh — fe2c4 — 1257  | -3221.53059  | 25.9 |
| 646 | 12v-03-Anticuboh — fe2c4 — 1742  | -3221.530532 | 25.9 |
| 647 | 12v-03-Anticuboh — fe2c4 — 1611  | -3221.530496 | 26.0 |
| 648 | 12v-01-Icos — fe2c4 — 248        | -3221.530245 | 26.1 |
| 649 | 12v-03-Anticuboh — fe2c4 — 1226  | -3221.530233 | 26.1 |
| 650 | 12v-02-Cuboctaedru — fe2c4 — 506 | -3221.530034 | 26.3 |
| 651 | 12v-01-Icos — fe2c4 — 144        | -3221.529927 | 26.3 |
| 652 | 12v-01-Icos — fe2c4 — 174        | -3221.529927 | 26.3 |
| 653 | 12v-02-Cuboctaedru — fe2c4 — 830 | -3221.529922 | 26.3 |
| 654 | 12v-03-Anticuboh — fe2c4 — 1687  | -3221.529648 | 26.5 |
| 655 | 12v-03-Anticuboh — fe2c4 — 1727  | -3221.529648 | 26.5 |
| 656 | 12v-01-Icos — fe2c4 — 194        | -3221.529358 | 26.7 |
| 657 | 12v-01-Icos — fe2c4 — 215        | -3221.529358 | 26.7 |
| 658 | 12v-02-Cuboctaedru — fe2c4 — 705 | -3221.529138 | 26.8 |
| 659 | 12v-02-Cuboctaedru — fe2c4 — 558 | -3221.529137 | 26.8 |
| 660 | 12v-03-Anticuboh — fe2c4 — 1808  | -3221.529062 | 26.9 |

|     |                    |       |      |              |      |
|-----|--------------------|-------|------|--------------|------|
| 661 | 12v-03-Anticuboh   | fe2c4 | 1815 | -3221.529062 | 26.9 |
| 662 | 12v-03-Anticuboh   | fe2c4 | 1872 | -3221.529062 | 26.9 |
| 663 | 12v-03-Anticuboh   | fe2c4 | 1631 | -3221.528694 | 27.1 |
| 664 | 12v-03-Anticuboh   | fe2c4 | 1714 | -3221.528069 | 27.5 |
| 665 | 12v-03-Anticuboh   | fe2c4 | 1887 | -3221.528051 | 27.5 |
| 666 | 12v-03-Anticuboh   | fe2c4 | 1738 | -3221.528042 | 27.5 |
| 667 | 12v-03-Anticuboh   | fe2c4 | 1745 | -3221.528041 | 27.5 |
| 668 | 12v-03-Anticuboh   | fe2c4 | 1820 | -3221.528005 | 27.5 |
| 669 | 12v-03-Anticuboh   | fe2c4 | 1327 | -3221.527994 | 27.5 |
| 670 | 12v-03-Anticuboh   | fe2c4 | 1348 | -3221.527968 | 27.6 |
| 671 | 12v-03-Anticuboh   | fe2c4 | 1355 | -3221.527913 | 27.6 |
| 672 | 12v-02-Cuboctaedru | fe2c4 | 411  | -3221.52782  | 27.6 |
| 673 | 12v-03-Anticuboh   | fe2c4 | 1300 | -3221.527719 | 27.7 |
| 674 | 12v-02-Cuboctaedru | fe2c4 | 441  | -3221.527716 | 27.7 |
| 675 | 12v-01-Icos        | fe2c4 | 44   | -3221.527384 | 27.9 |
| 676 | 12v-01-Icos        | fe2c4 | 56   | -3221.527384 | 27.9 |
| 677 | 12v-01-Icos        | fe2c4 | 36   | -3221.527309 | 28.0 |
| 678 | 12v-01-Icos        | fe2c4 | 50   | -3221.527309 | 28.0 |
| 679 | 12v-01-Icos        | fe2c4 | 66   | -3221.527255 | 28.0 |
| 680 | 12v-01-Icos        | fe2c4 | 92   | -3221.527255 | 28.0 |
| 681 | 12v-02-Cuboctaedru | fe2c4 | 583  | -3221.527216 | 28.0 |
| 682 | 12v-03-Anticuboh   | fe2c4 | 1853 | -3221.527186 | 28.0 |
| 683 | 12v-03-Anticuboh   | fe2c4 | 1552 | -3221.526967 | 28.2 |
| 684 | 12v-02-Cuboctaedru | fe2c4 | 728  | -3221.526965 | 28.2 |
| 685 | 12v-02-Cuboctaedru | fe2c4 | 628  | -3221.526957 | 28.2 |
| 686 | 12v-03-Anticuboh   | fe2c4 | 1250 | -3221.526926 | 28.2 |
| 687 | 12v-03-Anticuboh   | fe2c4 | 1320 | -3221.526926 | 28.2 |
| 688 | 12v-02-Cuboctaedru | fe2c4 | 544  | -3221.526862 | 28.3 |
| 689 | 12v-03-Anticuboh   | fe2c4 | 1821 | -3221.526845 | 28.3 |
| 690 | 12v-03-Anticuboh   | fe2c4 | 1849 | -3221.526845 | 28.3 |
| 691 | 12v-03-Anticuboh   | fe2c4 | 1908 | -3221.526845 | 28.3 |
| 692 | 12v-01-Icos        | fe2c4 | 232  | -3221.526721 | 28.3 |
| 693 | 12v-01-Icos        | fe2c4 | 241  | -3221.526721 | 28.3 |
| 694 | 12v-01-Icos        | fe2c4 | 247  | -3221.526721 | 28.3 |
| 695 | 12v-03-Anticuboh   | fe2c4 | 1204 | -3221.526672 | 28.4 |
| 696 | 12v-03-Anticuboh   | fe2c4 | 1289 | -3221.526642 | 28.4 |
| 697 | 12v-03-Anticuboh   | fe2c4 | 1290 | -3221.526601 | 28.4 |
| 698 | 12v-01-Icos        | fe2c4 | 249  | -3221.526419 | 28.5 |
| 699 | 12v-03-Anticuboh   | fe2c4 | 1007 | -3221.526336 | 28.6 |
| 700 | 12v-01-Icos        | fe2c4 | 228  | -3221.526264 | 28.6 |
| 701 | 12v-01-Icos        | fe2c4 | 238  | -3221.526264 | 28.6 |
| 702 | 12v-03-Anticuboh   | fe2c4 | 1475 | -3221.526253 | 28.6 |
| 703 | 12v-03-Anticuboh   | fe2c4 | 1511 | -3221.526253 | 28.6 |
| 704 | 12v-03-Anticuboh   | fe2c4 | 1518 | -3221.526253 | 28.6 |
| 705 | 12v-03-Anticuboh   | fe2c4 | 1567 | -3221.526253 | 28.6 |
| 706 | 12v-03-Anticuboh   | fe2c4 | 1595 | -3221.526253 | 28.6 |
| 707 | 12v-01-Icos        | fe2c4 | 235  | -3221.526249 | 28.6 |
| 708 | 12v-01-Icos        | fe2c4 | 187  | -3221.526237 | 28.6 |
| 709 | 12v-01-Icos        | fe2c4 | 217  | -3221.526237 | 28.6 |
| 710 | 12v-03-Anticuboh   | fe2c4 | 1015 | -3221.526221 | 28.7 |
| 711 | 12v-03-Anticuboh   | fe2c4 | 1063 | -3221.526221 | 28.7 |

|     |                    |       |      |              |      |
|-----|--------------------|-------|------|--------------|------|
| 712 | 12v-03-Anticuboh   | fe2c4 | 1870 | -3221.52622  | 28.7 |
| 713 | 12v-03-Anticuboh   | fe2c4 | 1898 | -3221.52622  | 28.7 |
| 714 | 12v-03-Anticuboh   | fe2c4 | 1905 | -3221.52622  | 28.7 |
| 715 | 12v-03-Anticuboh   | fe2c4 | 1008 | -3221.526218 | 28.7 |
| 716 | 12v-01-Icos        | fe2c4 | 200  | -3221.526177 | 28.7 |
| 717 | 12v-01-Icos        | fe2c4 | 214  | -3221.526177 | 28.7 |
| 718 | 12v-03-Anticuboh   | fe2c4 | 1285 | -3221.526052 | 28.8 |
| 719 | 12v-02-Cuboctaedru | fe2c4 | 257  | -3221.525955 | 28.8 |
| 720 | 12v-02-Cuboctaedru | fe2c4 | 832  | -3221.525951 | 28.8 |
| 721 | 12v-02-Cuboctaedru | fe2c4 | 343  | -3221.52595  | 28.8 |
| 722 | 12v-03-Anticuboh   | fe2c4 | 1416 | -3221.525891 | 28.9 |
| 723 | 12v-03-Anticuboh   | fe2c4 | 1423 | -3221.525891 | 28.9 |
| 724 | 12v-03-Anticuboh   | fe2c4 | 1246 | -3221.525704 | 29.0 |
| 725 | 12v-03-Anticuboh   | fe2c4 | 1252 | -3221.525704 | 29.0 |
| 726 | 12v-03-Anticuboh   | fe2c4 | 1322 | -3221.525704 | 29.0 |
| 727 | 12v-01-Icos        | fe2c4 | 102  | -3221.525268 | 29.3 |
| 728 | 12v-01-Icos        | fe2c4 | 73   | -3221.525268 | 29.3 |
| 729 | 12v-02-Cuboctaedru | fe2c4 | 789  | -3221.525186 | 29.3 |
| 730 | 12v-02-Cuboctaedru | fe2c4 | 802  | -3221.525186 | 29.3 |
| 731 | 12v-03-Anticuboh   | fe2c4 | 1391 | -3221.523663 | 30.3 |
| 732 | 12v-01-Icos        | fe2c4 | 40   | -3221.523515 | 30.4 |
| 733 | 12v-01-Icos        | fe2c4 | 49   | -3221.523505 | 30.4 |
| 734 | 12v-01-Icos        | fe2c4 | 63   | -3221.523505 | 30.4 |
| 735 | 12v-01-Icos        | fe2c4 | 106  | -3221.52349  | 30.4 |
| 736 | 12v-01-Icos        | fe2c4 | 60   | -3221.52349  | 30.4 |
| 737 | 12v-01-Icos        | fe2c4 | 69   | -3221.52349  | 30.4 |
| 738 | 12v-03-Anticuboh   | fe2c4 | 1903 | -3221.522722 | 30.8 |
| 739 | 12v-02-Cuboctaedru | fe2c4 | 297  | -3221.522693 | 30.9 |
| 740 | 12v-01-Icos        | fe2c4 | 2    | -3221.522691 | 30.9 |
| 741 | 12v-01-Icos        | fe2c4 | 18   | -3221.522659 | 30.9 |
| 742 | 12v-01-Icos        | fe2c4 | 33   | -3221.522659 | 30.9 |
| 743 | 12v-02-Cuboctaedru | fe2c4 | 270  | -3221.522599 | 30.9 |
| 744 | 12v-02-Cuboctaedru | fe2c4 | 308  | -3221.522599 | 30.9 |
| 745 | 12v-02-Cuboctaedru | fe2c4 | 277  | -3221.522568 | 30.9 |
| 746 | 12v-02-Cuboctaedru | fe2c4 | 334  | -3221.522567 | 30.9 |
| 747 | 12v-02-Cuboctaedru | fe2c4 | 372  | -3221.522551 | 31.0 |
| 748 | 12v-01-Icos        | fe2c4 | 32   | -3221.52252  | 31.0 |
| 749 | 12v-03-Anticuboh   | fe2c4 | 1668 | -3221.522496 | 31.0 |
| 750 | 12v-01-Icos        | fe2c4 | 178  | -3221.522472 | 31.0 |
| 751 | 12v-01-Icos        | fe2c4 | 197  | -3221.522472 | 31.0 |
| 752 | 12v-01-Icos        | fe2c4 | 220  | -3221.522472 | 31.0 |
| 753 | 12v-03-Anticuboh   | fe2c4 | 1240 | -3221.522314 | 31.1 |
| 754 | 12v-03-Anticuboh   | fe2c4 | 1170 | -3221.522309 | 31.1 |
| 755 | 12v-02-Cuboctaedru | fe2c4 | 332  | -3221.522278 | 31.1 |
| 756 | 12v-02-Cuboctaedru | fe2c4 | 346  | -3221.522278 | 31.1 |
| 757 | 12v-02-Cuboctaedru | fe2c4 | 353  | -3221.522278 | 31.1 |
| 758 | 12v-03-Anticuboh   | fe2c4 | 1186 | -3221.522256 | 31.1 |
| 759 | 12v-02-Cuboctaedru | fe2c4 | 337  | -3221.52221  | 31.2 |
| 760 | 12v-02-Cuboctaedru | fe2c4 | 306  | -3221.522106 | 31.2 |
| 761 | 12v-02-Cuboctaedru | fe2c4 | 326  | -3221.522106 | 31.2 |
| 762 | 12v-02-Cuboctaedru | fe2c4 | 371  | -3221.522106 | 31.2 |

|     |                                  |              |      |
|-----|----------------------------------|--------------|------|
| 763 | 12v-01-Icos — fe2c4 — 193        | -3221.522036 | 31.3 |
| 764 | 12v-01-Icos — fe2c4 — 201        | -3221.522036 | 31.3 |
| 765 | 12v-03-Anticuboh — fe2c4 — 1340  | -3221.521906 | 31.4 |
| 766 | 12v-03-Anticuboh — fe2c4 — 1010  | -3221.521843 | 31.4 |
| 767 | 12v-03-Anticuboh — fe2c4 — 1472  | -3221.521765 | 31.4 |
| 768 | 12v-01-Icos — fe2c4 — 240        | -3221.5215   | 31.6 |
| 769 | 12v-01-Icos — fe2c4 — 192        | -3221.520627 | 32.2 |
| 770 | 12v-01-Icos — fe2c4 — 208        | -3221.520627 | 32.2 |
| 771 | 12v-02-Cuboctaedru — fe2c4 — 981 | -3221.520435 | 32.3 |
| 772 | 12v-03-Anticuboh — fe2c4 — 1121  | -3221.520354 | 32.3 |
| 773 | 12v-03-Anticuboh — fe2c4 — 1114  | -3221.520353 | 32.3 |
| 774 | 12v-03-Anticuboh — fe2c4 — 1131  | -3221.520353 | 32.3 |
| 775 | 12v-03-Anticuboh — fe2c4 — 1159  | -3221.520351 | 32.3 |
| 776 | 12v-03-Anticuboh — fe2c4 — 1673  | -3221.520324 | 32.4 |
| 777 | 12v-03-Anticuboh — fe2c4 — 1749  | -3221.520324 | 32.4 |
| 778 | 12v-03-Anticuboh — fe2c4 — 1078  | -3221.52019  | 32.4 |
| 779 | 12v-03-Anticuboh — fe2c4 — 1476  | -3221.520182 | 32.4 |
| 780 | 12v-03-Anticuboh — fe2c4 — 1074  | -3221.520164 | 32.5 |
| 781 | 12v-03-Anticuboh — fe2c4 — 1384  | -3221.52004  | 32.5 |
| 782 | 12v-03-Anticuboh — fe2c4 — 1756  | -3221.519966 | 32.6 |
| 783 | 12v-02-Cuboctaedru — fe2c4 — 542 | -3221.519948 | 32.6 |
| 784 | 12v-03-Anticuboh — fe2c4 — 1771  | -3221.519894 | 32.6 |
| 785 | 12v-03-Anticuboh — fe2c4 — 1776  | -3221.519894 | 32.6 |
| 786 | 12v-03-Anticuboh — fe2c4 — 1792  | -3221.519894 | 32.6 |
| 787 | 12v-02-Cuboctaedru — fe2c4 — 713 | -3221.519796 | 32.7 |
| 788 | 12v-02-Cuboctaedru — fe2c4 — 720 | -3221.519793 | 32.7 |
| 789 | 12v-03-Anticuboh — fe2c4 — 1732  | -3221.519731 | 32.7 |
| 790 | 12v-03-Anticuboh — fe2c4 — 1715  | -3221.519676 | 32.8 |
| 791 | 12v-03-Anticuboh — fe2c4 — 1748  | -3221.519676 | 32.8 |
| 792 | 12v-02-Cuboctaedru — fe2c4 — 513 | -3221.519559 | 32.8 |
| 793 | 12v-03-Anticuboh — fe2c4 — 1328  | -3221.519549 | 32.8 |
| 794 | 12v-03-Anticuboh — fe2c4 — 1335  | -3221.519549 | 32.8 |
| 795 | 12v-03-Anticuboh — fe2c4 — 1405  | -3221.519549 | 32.8 |
| 796 | 12v-03-Anticuboh — fe2c4 — 1663  | -3221.519485 | 32.9 |
| 797 | 12v-03-Anticuboh — fe2c4 — 1642  | -3221.519404 | 32.9 |
| 798 | 12v-02-Cuboctaedru — fe2c4 — 567 | -3221.519256 | 33.0 |
| 799 | 12v-02-Cuboctaedru — fe2c4 — 629 | -3221.519246 | 33.0 |
| 800 | 12v-02-Cuboctaedru — fe2c4 — 435 | -3221.519104 | 33.1 |
| 801 | 12v-02-Cuboctaedru — fe2c4 — 288 | -3221.519047 | 33.2 |
| 802 | 12v-02-Cuboctaedru — fe2c4 — 295 | -3221.519047 | 33.2 |
| 803 | 12v-02-Cuboctaedru — fe2c4 — 269 | -3221.519042 | 33.2 |
| 804 | 12v-02-Cuboctaedru — fe2c4 — 322 | -3221.519042 | 33.2 |
| 805 | 12v-01-Icos — fe2c4 — 10         | -3221.519022 | 33.2 |
| 806 | 12v-01-Icos — fe2c4 — 24         | -3221.519022 | 33.2 |
| 807 | 12v-01-Icos — fe2c4 — 29         | -3221.519022 | 33.2 |
| 808 | 12v-01-Icos — fe2c4 — 112        | -3221.518944 | 33.2 |
| 809 | 12v-01-Icos — fe2c4 — 84         | -3221.518944 | 33.2 |
| 810 | 12v-01-Icos — fe2c4 — 22         | -3221.518932 | 33.2 |
| 811 | 12v-01-Icos — fe2c4 — 8          | -3221.518932 | 33.2 |
| 812 | 12v-03-Anticuboh — fe2c4 — 1730  | -3221.518747 | 33.3 |
| 813 | 12v-02-Cuboctaedru — fe2c4 — 267 | -3221.518336 | 33.6 |

|     |                                  |              |      |
|-----|----------------------------------|--------------|------|
| 814 | 12v-03-Anticuboh — fe2c4 — 1510  | -3221.518322 | 33.6 |
| 815 | 12v-02-Cuboctaedru — fe2c4 — 467 | -3221.518263 | 33.6 |
| 816 | 12v-02-Cuboctaedru — fe2c4 — 474 | -3221.518263 | 33.6 |
| 817 | 12v-02-Cuboctaedru — fe2c4 — 488 | -3221.518262 | 33.6 |
| 818 | 12v-02-Cuboctaedru — fe2c4 — 495 | -3221.518259 | 33.6 |
| 819 | 12v-02-Cuboctaedru — fe2c4 — 939 | -3221.518233 | 33.7 |
| 820 | 12v-02-Cuboctaedru — fe2c4 — 564 | -3221.518209 | 33.7 |
| 821 | 12v-02-Cuboctaedru — fe2c4 — 621 | -3221.518209 | 33.7 |
| 822 | 12v-02-Cuboctaedru — fe2c4 — 968 | -3221.518167 | 33.7 |
| 823 | 12v-02-Cuboctaedru — fe2c4 — 439 | -3221.518151 | 33.7 |
| 824 | 12v-02-Cuboctaedru — fe2c4 — 453 | -3221.518151 | 33.7 |
| 825 | 12v-03-Anticuboh — fe2c4 — 1184  | -3221.518119 | 33.7 |
| 826 | 12v-01-Icos — fe2c4 — 242        | -3221.51811  | 33.7 |
| 827 | 12v-03-Anticuboh — fe2c4 — 1723  | -3221.518009 | 33.8 |
| 828 | 12v-03-Anticuboh — fe2c4 — 1774  | -3221.518009 | 33.8 |
| 829 | 12v-03-Anticuboh — fe2c4 — 1634  | -3221.517883 | 33.9 |
| 830 | 12v-01-Icos — fe2c4 — 199        | -3221.517837 | 33.9 |
| 831 | 12v-01-Icos — fe2c4 — 206        | -3221.517837 | 33.9 |
| 832 | 12v-02-Cuboctaedru — fe2c4 — 870 | -3221.517772 | 34.0 |
| 833 | 12v-02-Cuboctaedru — fe2c4 — 845 | -3221.517695 | 34.0 |
| 834 | 12v-03-Anticuboh — fe2c4 — 1608  | -3221.517604 | 34.1 |
| 835 | 12v-03-Anticuboh — fe2c4 — 1517  | -3221.517602 | 34.1 |
| 836 | 12v-02-Cuboctaedru — fe2c4 — 362 | -3221.517583 | 34.1 |
| 837 | 12v-02-Cuboctaedru — fe2c4 — 319 | -3221.517567 | 34.1 |
| 838 | 12v-02-Cuboctaedru — fe2c4 — 311 | -3221.517566 | 34.1 |
| 839 | 12v-02-Cuboctaedru — fe2c4 — 378 | -3221.517566 | 34.1 |
| 840 | 12v-02-Cuboctaedru — fe2c4 — 882 | -3221.517399 | 34.2 |
| 841 | 12v-02-Cuboctaedru — fe2c4 — 888 | -3221.517391 | 34.2 |
| 842 | 12v-03-Anticuboh — fe2c4 — 1615  | -3221.517318 | 34.2 |
| 843 | 12v-02-Cuboctaedru — fe2c4 — 289 | -3221.517281 | 34.3 |
| 844 | 12v-02-Cuboctaedru — fe2c4 — 345 | -3221.517281 | 34.3 |
| 845 | 12v-02-Cuboctaedru — fe2c4 — 352 | -3221.517281 | 34.3 |
| 846 | 12v-01-Icos — fe2c4 — 13         | -3221.517177 | 34.3 |
| 847 | 12v-01-Icos — fe2c4 — 27         | -3221.517177 | 34.3 |
| 848 | 12v-01-Icos — fe2c4 — 11         | -3221.517155 | 34.3 |
| 849 | 12v-01-Icos — fe2c4 — 25         | -3221.517155 | 34.3 |
| 850 | 12v-01-Icos — fe2c4 — 21         | -3221.517102 | 34.4 |
| 851 | 12v-01-Icos — fe2c4 — 6          | -3221.517102 | 34.4 |
| 852 | 12v-02-Cuboctaedru — fe2c4 — 387 | -3221.517058 | 34.4 |
| 853 | 12v-03-Anticuboh — fe2c4 — 1453  | -3221.517055 | 34.4 |
| 854 | 12v-03-Anticuboh — fe2c4 — 1509  | -3221.517055 | 34.4 |
| 855 | 12v-03-Anticuboh — fe2c4 — 1516  | -3221.517055 | 34.4 |
| 856 | 12v-02-Cuboctaedru — fe2c4 — 365 | -3221.517034 | 34.4 |
| 857 | 12v-02-Cuboctaedru — fe2c4 — 494 | -3221.51703  | 34.4 |
| 858 | 12v-02-Cuboctaedru — fe2c4 — 938 | -3221.517021 | 34.4 |
| 859 | 12v-02-Cuboctaedru — fe2c4 — 942 | -3221.517021 | 34.4 |
| 860 | 12v-03-Anticuboh — fe2c4 — 1341  | -3221.517013 | 34.4 |
| 861 | 12v-03-Anticuboh — fe2c4 — 1397  | -3221.516996 | 34.4 |
| 862 | 12v-03-Anticuboh — fe2c4 — 1450  | -3221.516984 | 34.4 |
| 863 | 12v-03-Anticuboh — fe2c4 — 1439  | -3221.516967 | 34.5 |
| 864 | 12v-03-Anticuboh — fe2c4 — 1304  | -3221.516934 | 34.5 |

|     |                                  |              |      |
|-----|----------------------------------|--------------|------|
| 865 | 12v-02-Cuboctaedru — fe2c4 — 397 | -3221.516906 | 34.5 |
| 866 | 12v-03-Anticuboh — fe2c4 — 1371  | -3221.516792 | 34.6 |
| 867 | 12v-03-Anticuboh — fe2c4 — 1334  | -3221.516785 | 34.6 |
| 868 | 12v-03-Anticuboh — fe2c4 — 1404  | -3221.516785 | 34.6 |
| 869 | 12v-03-Anticuboh — fe2c4 — 1411  | -3221.516785 | 34.6 |
| 870 | 12v-03-Anticuboh — fe2c4 — 1394  | -3221.516777 | 34.6 |
| 871 | 12v-03-Anticuboh — fe2c4 — 1452  | -3221.516716 | 34.6 |
| 872 | 12v-01-Icos — fe2c4 — 137        | -3221.516645 | 34.7 |
| 873 | 12v-02-Cuboctaedru — fe2c4 — 876 | -3221.516615 | 34.7 |
| 874 | 12v-01-Icos — fe2c4 — 101        | -3221.516588 | 34.7 |
| 875 | 12v-01-Icos — fe2c4 — 136        | -3221.516588 | 34.7 |
| 876 | 12v-01-Icos — fe2c4 — 94         | -3221.516588 | 34.7 |
| 877 | 12v-02-Cuboctaedru — fe2c4 — 310 | -3221.516564 | 34.7 |
| 878 | 12v-02-Cuboctaedru — fe2c4 — 837 | -3221.516482 | 34.8 |
| 879 | 12v-02-Cuboctaedru — fe2c4 — 851 | -3221.516482 | 34.8 |
| 880 | 12v-02-Cuboctaedru — fe2c4 — 874 | -3221.516482 | 34.8 |
| 881 | 12v-02-Cuboctaedru — fe2c4 — 636 | -3221.516379 | 34.8 |
| 882 | 12v-02-Cuboctaedru — fe2c4 — 673 | -3221.516379 | 34.8 |
| 883 | 12v-02-Cuboctaedru — fe2c4 — 428 | -3221.516332 | 34.9 |
| 884 | 12v-03-Anticuboh — fe2c4 — 1408  | -3221.516286 | 34.9 |
| 885 | 12v-03-Anticuboh — fe2c4 — 1446  | -3221.516286 | 34.9 |
| 886 | 12v-03-Anticuboh — fe2c4 — 1225  | -3221.516268 | 34.9 |
| 887 | 12v-03-Anticuboh — fe2c4 — 1232  | -3221.516268 | 34.9 |
| 888 | 12v-03-Anticuboh — fe2c4 — 1287  | -3221.516268 | 34.9 |
| 889 | 12v-01-Icos — fe2c4 — 227        | -3221.516173 | 35.0 |
| 890 | 12v-01-Icos — fe2c4 — 185        | -3221.516171 | 35.0 |
| 891 | 12v-01-Icos — fe2c4 — 210        | -3221.516171 | 35.0 |
| 892 | 12v-01-Icos — fe2c4 — 230        | -3221.516171 | 35.0 |
| 893 | 12v-03-Anticuboh — fe2c4 — 1224  | -3221.516146 | 35.0 |
| 894 | 12v-02-Cuboctaedru — fe2c4 — 478 | -3221.516008 | 35.1 |
| 895 | 12v-02-Cuboctaedru — fe2c4 — 499 | -3221.516008 | 35.1 |
| 896 | 12v-03-Anticuboh — fe2c4 — 1462  | -3221.515979 | 35.1 |
| 897 | 12v-03-Anticuboh — fe2c4 — 1489  | -3221.515979 | 35.1 |
| 898 | 12v-03-Anticuboh — fe2c4 — 1525  | -3221.515979 | 35.1 |
| 899 | 12v-03-Anticuboh — fe2c4 — 1478  | -3221.515867 | 35.2 |
| 900 | 12v-03-Anticuboh — fe2c4 — 1527  | -3221.515867 | 35.2 |
| 901 | 12v-02-Cuboctaedru — fe2c4 — 395 | -3221.515763 | 35.2 |
| 902 | 12v-03-Anticuboh — fe2c4 — 1344  | -3221.51553  | 35.4 |
| 903 | 12v-03-Anticuboh — fe2c4 — 1379  | -3221.51553  | 35.4 |
| 904 | 12v-03-Anticuboh — fe2c4 — 1834  | -3221.515468 | 35.4 |
| 905 | 12v-03-Anticuboh — fe2c4 — 1888  | -3221.515467 | 35.4 |
| 906 | 12v-02-Cuboctaedru — fe2c4 — 386 | -3221.515383 | 35.5 |
| 907 | 12v-02-Cuboctaedru — fe2c4 — 393 | -3221.515383 | 35.5 |
| 908 | 12v-02-Cuboctaedru — fe2c4 — 407 | -3221.515383 | 35.5 |
| 909 | 12v-03-Anticuboh — fe2c4 — 1632  | -3221.5153   | 35.5 |
| 910 | 12v-03-Anticuboh — fe2c4 — 1840  | -3221.51529  | 35.5 |
| 911 | 12v-03-Anticuboh — fe2c4 — 1649  | -3221.515269 | 35.5 |
| 912 | 12v-03-Anticuboh — fe2c4 — 1684  | -3221.515269 | 35.5 |
| 913 | 12v-03-Anticuboh — fe2c4 — 1298  | -3221.515268 | 35.5 |
| 914 | 12v-03-Anticuboh — fe2c4 — 1501  | -3221.515211 | 35.6 |
| 915 | 12v-03-Anticuboh — fe2c4 — 1578  | -3221.515211 | 35.6 |

|     |                                  |              |      |
|-----|----------------------------------|--------------|------|
| 916 | 12v-01-Icos — fe2c4 — 104        | -3221.515163 | 35.6 |
| 917 | 12v-01-Icos — fe2c4 — 108        | -3221.515163 | 35.6 |
| 918 | 12v-01-Icos — fe2c4 — 169        | -3221.515134 | 35.6 |
| 919 | 12v-01-Icos — fe2c4 — 246        | -3221.515134 | 35.6 |
| 920 | 12v-03-Anticuboh — fe2c4 — 1833  | -3221.515018 | 35.7 |
| 921 | 12v-03-Anticuboh — fe2c4 — 1895  | -3221.515002 | 35.7 |
| 922 | 12v-03-Anticuboh — fe2c4 — 1582  | -3221.51498  | 35.7 |
| 923 | 12v-03-Anticuboh — fe2c4 — 1305  | -3221.514951 | 35.7 |
| 924 | 12v-03-Anticuboh — fe2c4 — 1690  | -3221.514946 | 35.7 |
| 925 | 12v-03-Anticuboh — fe2c4 — 1747  | -3221.514946 | 35.7 |
| 926 | 12v-03-Anticuboh — fe2c4 — 1733  | -3221.514945 | 35.7 |
| 927 | 12v-02-Cuboctaedru — fe2c4 — 438 | -3221.514944 | 35.7 |
| 928 | 12v-02-Cuboctaedru — fe2c4 — 446 | -3221.514944 | 35.7 |
| 929 | 12v-02-Cuboctaedru — fe2c4 — 829 | -3221.514928 | 35.7 |
| 930 | 12v-03-Anticuboh — fe2c4 — 1268  | -3221.514911 | 35.8 |
| 931 | 12v-03-Anticuboh — fe2c4 — 1874  | -3221.514895 | 35.8 |
| 932 | 12v-03-Anticuboh — fe2c4 — 1862  | -3221.514878 | 35.8 |
| 933 | 12v-03-Anticuboh — fe2c4 — 1620  | -3221.514856 | 35.8 |
| 934 | 12v-03-Anticuboh — fe2c4 — 1760  | -3221.514856 | 35.8 |
| 935 | 12v-03-Anticuboh — fe2c4 — 1387  | -3221.514847 | 35.8 |
| 936 | 12v-03-Anticuboh — fe2c4 — 1858  | -3221.514786 | 35.8 |
| 937 | 12v-01-Icos — fe2c4 — 158        | -3221.514747 | 35.9 |
| 938 | 12v-01-Icos — fe2c4 — 173        | -3221.514747 | 35.9 |
| 939 | 12v-01-Icos — fe2c4 — 212        | -3221.514747 | 35.9 |
| 940 | 12v-03-Anticuboh — fe2c4 — 1630  | -3221.514715 | 35.9 |
| 941 | 12v-03-Anticuboh — fe2c4 — 1273  | -3221.514655 | 35.9 |
| 942 | 12v-03-Anticuboh — fe2c4 — 1674  | -3221.514652 | 35.9 |
| 943 | 12v-02-Cuboctaedru — fe2c4 — 904 | -3221.514465 | 36.0 |
| 944 | 12v-01-Icos — fe2c4 — 175        | -3221.514411 | 36.1 |
| 945 | 12v-03-Anticuboh — fe2c4 — 1667  | -3221.51435  | 36.1 |
| 946 | 12v-01-Icos — fe2c4 — 150        | -3221.514348 | 36.1 |
| 947 | 12v-01-Icos — fe2c4 — 170        | -3221.514348 | 36.1 |
| 948 | 12v-01-Icos — fe2c4 — 233        | -3221.514348 | 36.1 |
| 949 | 12v-03-Anticuboh — fe2c4 — 1841  | -3221.514322 | 36.1 |
| 950 | 12v-01-Icos — fe2c4 — 237        | -3221.514185 | 36.2 |
| 951 | 12v-02-Cuboctaedru — fe2c4 — 422 | -3221.514163 | 36.2 |
| 952 | 12v-02-Cuboctaedru — fe2c4 — 413 | -3221.514161 | 36.2 |
| 953 | 12v-03-Anticuboh — fe2c4 — 1191  | -3221.514158 | 36.2 |
| 954 | 12v-03-Anticuboh — fe2c4 — 1106  | -3221.514079 | 36.3 |
| 955 | 12v-03-Anticuboh — fe2c4 — 1062  | -3221.51407  | 36.3 |
| 956 | 12v-03-Anticuboh — fe2c4 — 1036  | -3221.514067 | 36.3 |
| 957 | 12v-03-Anticuboh — fe2c4 — 1043  | -3221.514067 | 36.3 |
| 958 | 12v-03-Anticuboh — fe2c4 — 1811  | -3221.513899 | 36.4 |
| 959 | 12v-03-Anticuboh — fe2c4 — 1272  | -3221.513879 | 36.4 |
| 960 | 12v-03-Anticuboh — fe2c4 — 1710  | -3221.51378  | 36.5 |
| 961 | 12v-03-Anticuboh — fe2c4 — 1754  | -3221.51378  | 36.5 |
| 962 | 12v-02-Cuboctaedru — fe2c4 — 445 | -3221.513677 | 36.5 |
| 963 | 12v-02-Cuboctaedru — fe2c4 — 452 | -3221.513677 | 36.5 |
| 964 | 12v-03-Anticuboh — fe2c4 — 1859  | -3221.513603 | 36.6 |
| 965 | 12v-03-Anticuboh — fe2c4 — 1129  | -3221.513594 | 36.6 |
| 966 | 12v-01-Icos — fe2c4 — 116        | -3221.513593 | 36.6 |



|      |                                  |              |      |
|------|----------------------------------|--------------|------|
| 967  | 12v-01-Icos — fe2c4 — 123        | -3221.513593 | 36.6 |
| 968  | 12v-01-Icos — fe2c4 — 96         | -3221.513593 | 36.6 |
| 969  | 12v-02-Cuboctaedru — fe2c4 — 281 | -3221.513482 | 36.6 |
| 970  | 12v-03-Anticuboh — fe2c4 — 1115  | -3221.513475 | 36.7 |
| 971  | 12v-03-Anticuboh — fe2c4 — 1122  | -3221.513475 | 36.7 |
| 972  | 12v-03-Anticuboh — fe2c4 — 1133  | -3221.513473 | 36.7 |
| 973  | 12v-02-Cuboctaedru — fe2c4 — 935 | -3221.513433 | 36.7 |
| 974  | 12v-02-Cuboctaedru — fe2c4 — 984 | -3221.513433 | 36.7 |
| 975  | 12v-03-Anticuboh — fe2c4 — 1694  | -3221.513372 | 36.7 |
| 976  | 12v-03-Anticuboh — fe2c4 — 1734  | -3221.513372 | 36.7 |
| 977  | 12v-03-Anticuboh — fe2c4 — 1139  | -3221.51332  | 36.7 |
| 978  | 12v-03-Anticuboh — fe2c4 — 1118  | -3221.513312 | 36.8 |
| 979  | 12v-03-Anticuboh — fe2c4 — 1125  | -3221.513312 | 36.8 |
| 980  | 12v-03-Anticuboh — fe2c4 — 1167  | -3221.513312 | 36.8 |
| 981  | 12v-02-Cuboctaedru — fe2c4 — 398 | -3221.513277 | 36.8 |
| 982  | 12v-03-Anticuboh — fe2c4 — 1647  | -3221.513261 | 36.8 |
| 983  | 12v-03-Anticuboh — fe2c4 — 1619  | -3221.513167 | 36.8 |
| 984  | 12v-03-Anticuboh — fe2c4 — 1702  | -3221.513167 | 36.8 |
| 985  | 12v-03-Anticuboh — fe2c4 — 1781  | -3221.513167 | 36.8 |
| 986  | 12v-03-Anticuboh — fe2c4 — 1409  | -3221.513013 | 36.9 |
| 987  | 12v-03-Anticuboh — fe2c4 — 1437  | -3221.512945 | 37.0 |
| 988  | 12v-02-Cuboctaedru — fe2c4 — 419 | -3221.512801 | 37.1 |
| 989  | 12v-02-Cuboctaedru — fe2c4 — 461 | -3221.512801 | 37.1 |
| 990  | 12v-03-Anticuboh — fe2c4 — 1413  | -3221.512783 | 37.1 |
| 991  | 12v-03-Anticuboh — fe2c4 — 1419  | -3221.512783 | 37.1 |
| 992  | 12v-03-Anticuboh — fe2c4 — 1426  | -3221.512783 | 37.1 |
| 993  | 12v-03-Anticuboh — fe2c4 — 1441  | -3221.512783 | 37.1 |
| 994  | 12v-01-Icos — fe2c4 — 122        | -3221.512715 | 37.1 |
| 995  | 12v-01-Icos — fe2c4 — 138        | -3221.512715 | 37.1 |
| 996  | 12v-02-Cuboctaedru — fe2c4 — 595 | -3221.512713 | 37.1 |
| 997  | 12v-02-Cuboctaedru — fe2c4 — 581 | -3221.51269  | 37.1 |
| 998  | 12v-02-Cuboctaedru — fe2c4 — 586 | -3221.51269  | 37.1 |
| 999  | 12v-02-Cuboctaedru — fe2c4 — 657 | -3221.51269  | 37.1 |
| 1000 | 12v-01-Icos — fe2c4 — 139        | -3221.512655 | 37.2 |
| 1001 | 12v-02-Cuboctaedru — fe2c4 — 538 | -3221.512551 | 37.2 |
| 1002 | 12v-02-Cuboctaedru — fe2c4 — 672 | -3221.512551 | 37.2 |
| 1003 | 12v-02-Cuboctaedru — fe2c4 — 805 | -3221.512551 | 37.2 |
| 1004 | 12v-03-Anticuboh — fe2c4 — 1875  | -3221.512376 | 37.3 |
| 1005 | 12v-03-Anticuboh — fe2c4 — 1275  | -3221.512296 | 37.4 |
| 1006 | 12v-03-Anticuboh — fe2c4 — 1628  | -3221.512289 | 37.4 |
| 1007 | 12v-03-Anticuboh — fe2c4 — 1786  | -3221.512289 | 37.4 |
| 1008 | 12v-03-Anticuboh — fe2c4 — 1765  | -3221.512287 | 37.4 |
| 1009 | 12v-02-Cuboctaedru — fe2c4 — 982 | -3221.512251 | 37.4 |
| 1010 | 12v-02-Cuboctaedru — fe2c4 — 988 | -3221.512251 | 37.4 |
| 1011 | 12v-03-Anticuboh — fe2c4 — 1137  | -3221.512246 | 37.4 |
| 1012 | 12v-03-Anticuboh — fe2c4 — 1165  | -3221.512246 | 37.4 |
| 1013 | 12v-03-Anticuboh — fe2c4 — 1178  | -3221.512246 | 37.4 |
| 1014 | 12v-03-Anticuboh — fe2c4 — 1150  | -3221.51224  | 37.4 |
| 1015 | 12v-03-Anticuboh — fe2c4 — 1194  | -3221.51224  | 37.4 |
| 1016 | 12v-03-Anticuboh — fe2c4 — 1624  | -3221.512231 | 37.4 |
| 1017 | 12v-03-Anticuboh — fe2c4 — 1695  | -3221.512231 | 37.4 |

|      |                    |       |      |              |      |
|------|--------------------|-------|------|--------------|------|
| 1018 | 12v-02-Cuboctaedru | fe2c4 | 320  | -3221.512149 | 37.5 |
| 1019 | 12v-02-Cuboctaedru | fe2c4 | 325  | -3221.512149 | 37.5 |
| 1020 | 12v-03-Anticuboh   | fe2c4 | 1651 | -3221.512135 | 37.5 |
| 1021 | 12v-02-Cuboctaedru | fe2c4 | 278  | -3221.512037 | 37.6 |
| 1022 | 12v-02-Cuboctaedru | fe2c4 | 341  | -3221.512037 | 37.6 |
| 1023 | 12v-03-Anticuboh   | fe2c4 | 1869 | -3221.512035 | 37.6 |
| 1024 | 12v-02-Cuboctaedru | fe2c4 | 358  | -3221.512006 | 37.6 |
| 1025 | 12v-03-Anticuboh   | fe2c4 | 1783 | -3221.511832 | 37.7 |
| 1026 | 12v-01-Icos        | fe2c4 | 159  | -3221.511831 | 37.7 |
| 1027 | 12v-01-Icos        | fe2c4 | 191  | -3221.511831 | 37.7 |
| 1028 | 12v-01-Icos        | fe2c4 | 162  | -3221.511826 | 37.7 |
| 1029 | 12v-02-Cuboctaedru | fe2c4 | 429  | -3221.511791 | 37.7 |
| 1030 | 12v-02-Cuboctaedru | fe2c4 | 456  | -3221.511789 | 37.7 |
| 1031 | 12v-02-Cuboctaedru | fe2c4 | 394  | -3221.511788 | 37.7 |
| 1032 | 12v-02-Cuboctaedru | fe2c4 | 414  | -3221.511788 | 37.7 |
| 1033 | 12v-02-Cuboctaedru | fe2c4 | 401  | -3221.511787 | 37.7 |
| 1034 | 12v-02-Cuboctaedru | fe2c4 | 909  | -3221.511388 | 38.0 |
| 1035 | 12v-03-Anticuboh   | fe2c4 | 1813 | -3221.511387 | 38.0 |
| 1036 | 12v-03-Anticuboh   | fe2c4 | 1696 | -3221.51127  | 38.0 |
| 1037 | 12v-02-Cuboctaedru | fe2c4 | 842  | -3221.511247 | 38.0 |
| 1038 | 12v-02-Cuboctaedru | fe2c4 | 897  | -3221.511234 | 38.1 |
| 1039 | 12v-02-Cuboctaedru | fe2c4 | 390  | -3221.511164 | 38.1 |
| 1040 | 12v-03-Anticuboh   | fe2c4 | 1707 | -3221.51113  | 38.1 |
| 1041 | 12v-03-Anticuboh   | fe2c4 | 1866 | -3221.511108 | 38.1 |
| 1042 | 12v-03-Anticuboh   | fe2c4 | 1279 | -3221.510975 | 38.2 |
| 1043 | 12v-01-Icos        | fe2c4 | 195  | -3221.510971 | 38.2 |
| 1044 | 12v-02-Cuboctaedru | fe2c4 | 555  | -3221.510817 | 38.3 |
| 1045 | 12v-02-Cuboctaedru | fe2c4 | 569  | -3221.510817 | 38.3 |
| 1046 | 12v-02-Cuboctaedru | fe2c4 | 688  | -3221.510817 | 38.3 |
| 1047 | 12v-02-Cuboctaedru | fe2c4 | 379  | -3221.51079  | 38.3 |
| 1048 | 12v-02-Cuboctaedru | fe2c4 | 838  | -3221.510687 | 38.4 |
| 1049 | 12v-02-Cuboctaedru | fe2c4 | 852  | -3221.510687 | 38.4 |
| 1050 | 12v-02-Cuboctaedru | fe2c4 | 923  | -3221.510687 | 38.4 |
| 1051 | 12v-02-Cuboctaedru | fe2c4 | 507  | -3221.51048  | 38.5 |
| 1052 | 12v-02-Cuboctaedru | fe2c4 | 481  | -3221.510476 | 38.5 |
| 1053 | 12v-02-Cuboctaedru | fe2c4 | 502  | -3221.510476 | 38.5 |
| 1054 | 12v-03-Anticuboh   | fe2c4 | 1231 | -3221.510442 | 38.6 |
| 1055 | 12v-03-Anticuboh   | fe2c4 | 1294 | -3221.510442 | 38.6 |
| 1056 | 12v-02-Cuboctaedru | fe2c4 | 918  | -3221.510333 | 38.6 |
| 1057 | 12v-03-Anticuboh   | fe2c4 | 1635 | -3221.509985 | 38.8 |
| 1058 | 12v-02-Cuboctaedru | fe2c4 | 283  | -3221.509937 | 38.9 |
| 1059 | 12v-02-Cuboctaedru | fe2c4 | 349  | -3221.509937 | 38.9 |
| 1060 | 12v-02-Cuboctaedru | fe2c4 | 356  | -3221.509937 | 38.9 |
| 1061 | 12v-02-Cuboctaedru | fe2c4 | 800  | -3221.509726 | 39.0 |
| 1062 | 12v-02-Cuboctaedru | fe2c4 | 464  | -3221.509705 | 39.0 |
| 1063 | 12v-02-Cuboctaedru | fe2c4 | 492  | -3221.509705 | 39.0 |
| 1064 | 12v-02-Cuboctaedru | fe2c4 | 667  | -3221.509592 | 39.1 |
| 1065 | 12v-03-Anticuboh   | fe2c4 | 1697 | -3221.509163 | 39.4 |
| 1066 | 12v-03-Anticuboh   | fe2c4 | 1708 | -3221.509163 | 39.4 |
| 1067 | 12v-02-Cuboctaedru | fe2c4 | 929  | -3221.509093 | 39.4 |
| 1068 | 12v-02-Cuboctaedru | fe2c4 | 608  | -3221.508956 | 39.5 |

|      |                                  |              |      |
|------|----------------------------------|--------------|------|
| 1069 | 12v-02-Cuboctaedru — fe2c4 — 674 | -3221.508956 | 39.5 |
| 1070 | 12v-03-Anticuboh — fe2c4 — 1436  | -3221.508853 | 39.6 |
| 1071 | 12v-03-Anticuboh — fe2c4 — 1500  | -3221.50875  | 39.6 |
| 1072 | 12v-03-Anticuboh — fe2c4 — 1479  | -3221.508745 | 39.6 |
| 1073 | 12v-03-Anticuboh — fe2c4 — 1284  | -3221.508697 | 39.6 |
| 1074 | 12v-03-Anticuboh — fe2c4 — 1376  | -3221.508663 | 39.7 |
| 1075 | 12v-03-Anticuboh — fe2c4 — 1378  | -3221.508601 | 39.7 |
| 1076 | 12v-03-Anticuboh — fe2c4 — 1372  | -3221.508599 | 39.7 |
| 1077 | 12v-02-Cuboctaedru — fe2c4 — 408 | -3221.508563 | 39.7 |
| 1078 | 12v-02-Cuboctaedru — fe2c4 — 415 | -3221.508563 | 39.7 |
| 1079 | 12v-02-Cuboctaedru — fe2c4 — 457 | -3221.508563 | 39.7 |
| 1080 | 12v-03-Anticuboh — fe2c4 — 1625  | -3221.508309 | 39.9 |
| 1081 | 12v-03-Anticuboh — fe2c4 — 1751  | -3221.508309 | 39.9 |
| 1082 | 12v-03-Anticuboh — fe2c4 — 1779  | -3221.508309 | 39.9 |
| 1083 | 12v-01-Icos — fe2c4 — 181        | -3221.508155 | 40.0 |
| 1084 | 12v-01-Icos — fe2c4 — 223        | -3221.508155 | 40.0 |
| 1085 | 12v-03-Anticuboh — fe2c4 — 1709  | -3221.508061 | 40.0 |
| 1086 | 12v-03-Anticuboh — fe2c4 — 1766  | -3221.50806  | 40.0 |
| 1087 | 12v-03-Anticuboh — fe2c4 — 1787  | -3221.50806  | 40.0 |
| 1088 | 12v-03-Anticuboh — fe2c4 — 1782  | -3221.508058 | 40.1 |
| 1089 | 12v-02-Cuboctaedru — fe2c4 — 301 | -3221.508031 | 40.1 |
| 1090 | 12v-03-Anticuboh — fe2c4 — 1469  | -3221.507967 | 40.1 |
| 1091 | 12v-01-Icos — fe2c4 — 165        | -3221.507911 | 40.1 |
| 1092 | 12v-01-Icos — fe2c4 — 244        | -3221.507829 | 40.2 |
| 1093 | 12v-01-Icos — fe2c4 — 149        | -3221.507818 | 40.2 |
| 1094 | 12v-01-Icos — fe2c4 — 163        | -3221.507818 | 40.2 |
| 1095 | 12v-03-Anticuboh — fe2c4 — 1677  | -3221.507815 | 40.2 |
| 1096 | 12v-02-Cuboctaedru — fe2c4 — 927 | -3221.507764 | 40.2 |
| 1097 | 12v-02-Cuboctaedru — fe2c4 — 872 | -3221.507709 | 40.3 |
| 1098 | 12v-02-Cuboctaedru — fe2c4 — 921 | -3221.507709 | 40.3 |
| 1099 | 12v-03-Anticuboh — fe2c4 — 1675  | -3221.507693 | 40.3 |
| 1100 | 12v-02-Cuboctaedru — fe2c4 — 284 | -3221.507686 | 40.3 |
| 1101 | 12v-02-Cuboctaedru — fe2c4 — 335 | -3221.507686 | 40.3 |
| 1102 | 12v-01-Icos — fe2c4 — 42         | -3221.507673 | 40.3 |
| 1103 | 12v-01-Icos — fe2c4 — 43         | -3221.507673 | 40.3 |
| 1104 | 12v-01-Icos — fe2c4 — 67         | -3221.507613 | 40.3 |
| 1105 | 12v-01-Icos — fe2c4 — 71         | -3221.507613 | 40.3 |
| 1106 | 12v-03-Anticuboh — fe2c4 — 1392  | -3221.507589 | 40.3 |
| 1107 | 12v-01-Icos — fe2c4 — 209        | -3221.507569 | 40.4 |
| 1108 | 12v-02-Cuboctaedru — fe2c4 — 880 | -3221.507429 | 40.4 |
| 1109 | 12v-02-Cuboctaedru — fe2c4 — 922 | -3221.507422 | 40.4 |
| 1110 | 12v-02-Cuboctaedru — fe2c4 — 846 | -3221.507339 | 40.5 |
| 1111 | 12v-03-Anticuboh — fe2c4 — 1904  | -3221.507336 | 40.5 |
| 1112 | 12v-01-Icos — fe2c4 — 229        | -3221.507332 | 40.5 |
| 1113 | 12v-03-Anticuboh — fe2c4 — 1816  | -3221.507311 | 40.5 |
| 1114 | 12v-03-Anticuboh — fe2c4 — 1879  | -3221.507311 | 40.5 |
| 1115 | 12v-03-Anticuboh — fe2c4 — 1689  | -3221.507285 | 40.5 |
| 1116 | 12v-03-Anticuboh — fe2c4 — 1740  | -3221.507285 | 40.5 |
| 1117 | 12v-03-Anticuboh — fe2c4 — 1784  | -3221.507195 | 40.6 |
| 1118 | 12v-03-Anticuboh — fe2c4 — 1884  | -3221.507143 | 40.6 |
| 1119 | 12v-03-Anticuboh — fe2c4 — 1532  | -3221.507112 | 40.6 |

|      |                    |       |      |              |      |
|------|--------------------|-------|------|--------------|------|
| 1120 | 12v-03-Anticuboh   | fe2c4 | 1241 | -3221.507083 | 40.7 |
| 1121 | 12v-03-Anticuboh   | fe2c4 | 1299 | -3221.507045 | 40.7 |
| 1122 | 12v-03-Anticuboh   | fe2c4 | 1310 | -3221.507045 | 40.7 |
| 1123 | 12v-03-Anticuboh   | fe2c4 | 1233 | -3221.507044 | 40.7 |
| 1124 | 12v-02-Cuboctaedru | fe2c4 | 469  | -3221.507031 | 40.7 |
| 1125 | 12v-02-Cuboctaedru | fe2c4 | 497  | -3221.507031 | 40.7 |
| 1126 | 12v-01-Icos        | fe2c4 | 151  | -3221.50701  | 40.7 |
| 1127 | 12v-01-Icos        | fe2c4 | 225  | -3221.506963 | 40.7 |
| 1128 | 12v-01-Icos        | fe2c4 | 245  | -3221.506963 | 40.7 |
| 1129 | 12v-03-Anticuboh   | fe2c4 | 1458 | -3221.50672  | 40.9 |
| 1130 | 12v-03-Anticuboh   | fe2c4 | 1481 | -3221.50672  | 40.9 |
| 1131 | 12v-03-Anticuboh   | fe2c4 | 1521 | -3221.50672  | 40.9 |
| 1132 | 12v-03-Anticuboh   | fe2c4 | 1382 | -3221.506701 | 40.9 |
| 1133 | 12v-03-Anticuboh   | fe2c4 | 1360 | -3221.506698 | 40.9 |
| 1134 | 12v-03-Anticuboh   | fe2c4 | 1670 | -3221.506658 | 40.9 |
| 1135 | 12v-03-Anticuboh   | fe2c4 | 1829 | -3221.506601 | 41.0 |
| 1136 | 12v-03-Anticuboh   | fe2c4 | 1873 | -3221.506601 | 41.0 |
| 1137 | 12v-03-Anticuboh   | fe2c4 | 1822 | -3221.5066   | 41.0 |
| 1138 | 12v-02-Cuboctaedru | fe2c4 | 706  | -3221.506591 | 41.0 |
| 1139 | 12v-03-Anticuboh   | fe2c4 | 1823 | -3221.506581 | 41.0 |
| 1140 | 12v-03-Anticuboh   | fe2c4 | 1836 | -3221.506581 | 41.0 |
| 1141 | 12v-02-Cuboctaedru | fe2c4 | 399  | -3221.506477 | 41.0 |
| 1142 | 12v-02-Cuboctaedru | fe2c4 | 421  | -3221.506475 | 41.0 |
| 1143 | 12v-01-Icos        | fe2c4 | 168  | -3221.506423 | 41.1 |
| 1144 | 12v-02-Cuboctaedru | fe2c4 | 418  | -3221.5062   | 41.2 |
| 1145 | 12v-02-Cuboctaedru | fe2c4 | 460  | -3221.5062   | 41.2 |
| 1146 | 12v-02-Cuboctaedru | fe2c4 | 465  | -3221.5062   | 41.2 |
| 1147 | 12v-02-Cuboctaedru | fe2c4 | 493  | -3221.5062   | 41.2 |
| 1148 | 12v-01-Icos        | fe2c4 | 189  | -3221.506136 | 41.3 |
| 1149 | 12v-02-Cuboctaedru | fe2c4 | 644  | -3221.505537 | 41.6 |
| 1150 | 12v-02-Cuboctaedru | fe2c4 | 648  | -3221.505537 | 41.6 |
| 1151 | 12v-02-Cuboctaedru | fe2c4 | 654  | -3221.505537 | 41.6 |
| 1152 | 12v-02-Cuboctaedru | fe2c4 | 777  | -3221.505537 | 41.6 |
| 1153 | 12v-02-Cuboctaedru | fe2c4 | 795  | -3221.505537 | 41.6 |
| 1154 | 12v-03-Anticuboh   | fe2c4 | 1704 | -3221.50548  | 41.7 |
| 1155 | 12v-03-Anticuboh   | fe2c4 | 1718 | -3221.50548  | 41.7 |
| 1156 | 12v-03-Anticuboh   | fe2c4 | 1911 | -3221.505461 | 41.7 |
| 1157 | 12v-03-Anticuboh   | fe2c4 | 1863 | -3221.505298 | 41.8 |
| 1158 | 12v-03-Anticuboh   | fe2c4 | 1235 | -3221.505215 | 41.8 |
| 1159 | 12v-03-Anticuboh   | fe2c4 | 1312 | -3221.505215 | 41.8 |
| 1160 | 12v-03-Anticuboh   | fe2c4 | 1451 | -3221.505048 | 41.9 |
| 1161 | 12v-03-Anticuboh   | fe2c4 | 1318 | -3221.504857 | 42.1 |
| 1162 | 12v-02-Cuboctaedru | fe2c4 | 406  | -3221.504668 | 42.2 |
| 1163 | 12v-02-Cuboctaedru | fe2c4 | 434  | -3221.504668 | 42.2 |
| 1164 | 12v-03-Anticuboh   | fe2c4 | 1492 | -3221.504565 | 42.2 |
| 1165 | 12v-03-Anticuboh   | fe2c4 | 1686 | -3221.503978 | 42.6 |
| 1166 | 12v-01-Icos        | fe2c4 | 234  | -3221.503928 | 42.6 |
| 1167 | 12v-02-Cuboctaedru | fe2c4 | 963  | -3221.503918 | 42.6 |
| 1168 | 12v-01-Icos        | fe2c4 | 252  | -3221.503897 | 42.7 |
| 1169 | 12v-03-Anticuboh   | fe2c4 | 1248 | -3221.503741 | 42.8 |
| 1170 | 12v-03-Anticuboh   | fe2c4 | 1278 | -3221.503728 | 42.8 |

|      |                                  |              |      |
|------|----------------------------------|--------------|------|
| 1171 | 12v-02-Cuboctaedru — fe2c4 — 847 | -3221.503686 | 42.8 |
| 1172 | 12v-03-Anticuboh — fe2c4 — 1459  | -3221.503649 | 42.8 |
| 1173 | 12v-03-Anticuboh — fe2c4 — 1502  | -3221.503649 | 42.8 |
| 1174 | 12v-03-Anticuboh — fe2c4 — 1522  | -3221.503649 | 42.8 |
| 1175 | 12v-03-Anticuboh — fe2c4 — 1158  | -3221.503383 | 43.0 |
| 1176 | 12v-03-Anticuboh — fe2c4 — 1533  | -3221.503309 | 43.0 |
| 1177 | 12v-01-Icos — fe2c4 — 207        | -3221.503293 | 43.0 |
| 1178 | 12v-01-Icos — fe2c4 — 213        | -3221.503293 | 43.0 |
| 1179 | 12v-01-Icos — fe2c4 — 236        | -3221.503293 | 43.0 |
| 1180 | 12v-03-Anticuboh — fe2c4 — 1612  | -3221.503256 | 43.1 |
| 1181 | 12v-03-Anticuboh — fe2c4 — 1652  | -3221.503228 | 43.1 |
| 1182 | 12v-03-Anticuboh — fe2c4 — 1692  | -3221.503228 | 43.1 |
| 1183 | 12v-03-Anticuboh — fe2c4 — 1699  | -3221.503228 | 43.1 |
| 1184 | 12v-03-Anticuboh — fe2c4 — 1623  | -3221.502912 | 43.3 |
| 1185 | 12v-03-Anticuboh — fe2c4 — 1622  | -3221.502294 | 43.7 |
| 1186 | 12v-03-Anticuboh — fe2c4 — 1639  | -3221.502294 | 43.7 |
| 1187 | 12v-02-Cuboctaedru — fe2c4 — 383 | -3221.502147 | 43.8 |
| 1188 | 12v-02-Cuboctaedru — fe2c4 — 454 | -3221.502147 | 43.8 |
| 1189 | 12v-03-Anticuboh — fe2c4 — 1643  | -3221.502132 | 43.8 |
| 1190 | 12v-03-Anticuboh — fe2c4 — 1650  | -3221.502132 | 43.8 |
| 1191 | 12v-02-Cuboctaedru — fe2c4 — 293 | -3221.502077 | 43.8 |
| 1192 | 12v-03-Anticuboh — fe2c4 — 1288  | -3221.502072 | 43.8 |
| 1193 | 12v-03-Anticuboh — fe2c4 — 1295  | -3221.502072 | 43.8 |
| 1194 | 12v-02-Cuboctaedru — fe2c4 — 511 | -3221.501812 | 44.0 |
| 1195 | 12v-02-Cuboctaedru — fe2c4 — 498 | -3221.501679 | 44.1 |
| 1196 | 12v-02-Cuboctaedru — fe2c4 — 477 | -3221.501671 | 44.1 |
| 1197 | 12v-02-Cuboctaedru — fe2c4 — 443 | -3221.501668 | 44.1 |
| 1198 | 12v-02-Cuboctaedru — fe2c4 — 282 | -3221.501662 | 44.1 |
| 1199 | 12v-01-Icos — fe2c4 — 179        | -3221.501372 | 44.2 |
| 1200 | 12v-01-Icos — fe2c4 — 211        | -3221.501372 | 44.2 |
| 1201 | 12v-01-Icos — fe2c4 — 221        | -3221.501372 | 44.2 |
| 1202 | 12v-01-Icos — fe2c4 — 250        | -3221.501372 | 44.2 |
| 1203 | 12v-02-Cuboctaedru — fe2c4 — 575 | -3221.50132  | 44.3 |
| 1204 | 12v-02-Cuboctaedru — fe2c4 — 607 | -3221.500974 | 44.5 |
| 1205 | 12v-02-Cuboctaedru — fe2c4 — 695 | -3221.500974 | 44.5 |
| 1206 | 12v-03-Anticuboh — fe2c4 — 1210  | -3221.500887 | 44.6 |
| 1207 | 12v-03-Anticuboh — fe2c4 — 1230  | -3221.500887 | 44.6 |
| 1208 | 12v-03-Anticuboh — fe2c4 — 1237  | -3221.500887 | 44.6 |
| 1209 | 12v-03-Anticuboh — fe2c4 — 1259  | -3221.500887 | 44.6 |
| 1210 | 12v-03-Anticuboh — fe2c4 — 1266  | -3221.500887 | 44.6 |
| 1211 | 12v-03-Anticuboh — fe2c4 — 1314  | -3221.500887 | 44.6 |
| 1212 | 12v-03-Anticuboh — fe2c4 — 1206  | -3221.50061  | 44.7 |
| 1213 | 12v-03-Anticuboh — fe2c4 — 1255  | -3221.50061  | 44.7 |
| 1214 | 12v-03-Anticuboh — fe2c4 — 1262  | -3221.50061  | 44.7 |
| 1215 | 12v-03-Anticuboh — fe2c4 — 1844  | -3221.500606 | 44.7 |
| 1216 | 12v-03-Anticuboh — fe2c4 — 1848  | -3221.500592 | 44.7 |
| 1217 | 12v-02-Cuboctaedru — fe2c4 — 285 | -3221.500509 | 44.8 |
| 1218 | 12v-02-Cuboctaedru — fe2c4 — 342 | -3221.500509 | 44.8 |
| 1219 | 12v-03-Anticuboh — fe2c4 — 1041  | -3221.500344 | 44.9 |
| 1220 | 12v-03-Anticuboh — fe2c4 — 1021  | -3221.500341 | 44.9 |
| 1221 | 12v-03-Anticuboh — fe2c4 — 1098  | -3221.500338 | 44.9 |

|      |                    |       |      |              |      |
|------|--------------------|-------|------|--------------|------|
| 1222 | 12v-02-Cuboctaedru | fe2c4 | 416  | -3221.500165 | 45.0 |
| 1223 | 12v-02-Cuboctaedru | fe2c4 | 458  | -3221.500165 | 45.0 |
| 1224 | 12v-02-Cuboctaedru | fe2c4 | 479  | -3221.500165 | 45.0 |
| 1225 | 12v-02-Cuboctaedru | fe2c4 | 500  | -3221.500165 | 45.0 |
| 1226 | 12v-02-Cuboctaedru | fe2c4 | 536  | -3221.500093 | 45.0 |
| 1227 | 12v-02-Cuboctaedru | fe2c4 | 679  | -3221.500093 | 45.0 |
| 1228 | 12v-02-Cuboctaedru | fe2c4 | 791  | -3221.500093 | 45.0 |
| 1229 | 12v-02-Cuboctaedru | fe2c4 | 363  | -3221.499908 | 45.2 |
| 1230 | 12v-02-Cuboctaedru | fe2c4 | 338  | -3221.499647 | 45.3 |
| 1231 | 12v-03-Anticuboh   | fe2c4 | 1503 | -3221.499552 | 45.4 |
| 1232 | 12v-01-Icos        | fe2c4 | 143  | -3221.499403 | 45.5 |
| 1233 | 12v-01-Icos        | fe2c4 | 167  | -3221.499403 | 45.5 |
| 1234 | 12v-02-Cuboctaedru | fe2c4 | 505  | -3221.499322 | 45.5 |
| 1235 | 12v-02-Cuboctaedru | fe2c4 | 873  | -3221.49918  | 45.6 |
| 1236 | 12v-02-Cuboctaedru | fe2c4 | 879  | -3221.499113 | 45.7 |
| 1237 | 12v-01-Icos        | fe2c4 | 146  | -3221.499074 | 45.7 |
| 1238 | 12v-01-Icos        | fe2c4 | 160  | -3221.499074 | 45.7 |
| 1239 | 12v-03-Anticuboh   | fe2c4 | 1012 | -3221.498975 | 45.8 |
| 1240 | 12v-03-Anticuboh   | fe2c4 | 1003 | -3221.498971 | 45.8 |
| 1241 | 12v-02-Cuboctaedru | fe2c4 | 403  | -3221.498861 | 45.8 |
| 1242 | 12v-02-Cuboctaedru | fe2c4 | 431  | -3221.498861 | 45.8 |
| 1243 | 12v-02-Cuboctaedru | fe2c4 | 451  | -3221.498861 | 45.8 |
| 1244 | 12v-02-Cuboctaedru | fe2c4 | 611  | -3221.498848 | 45.8 |
| 1245 | 12v-02-Cuboctaedru | fe2c4 | 646  | -3221.498848 | 45.8 |
| 1246 | 12v-02-Cuboctaedru | fe2c4 | 793  | -3221.498848 | 45.8 |
| 1247 | 12v-01-Icos        | fe2c4 | 188  | -3221.498832 | 45.8 |
| 1248 | 12v-01-Icos        | fe2c4 | 196  | -3221.498832 | 45.8 |
| 1249 | 12v-03-Anticuboh   | fe2c4 | 1701 | -3221.498566 | 46.0 |
| 1250 | 12v-03-Anticuboh   | fe2c4 | 1735 | -3221.498566 | 46.0 |
| 1251 | 12v-03-Anticuboh   | fe2c4 | 1654 | -3221.498411 | 46.1 |
| 1252 | 12v-02-Cuboctaedru | fe2c4 | 384  | -3221.49838  | 46.1 |
| 1253 | 12v-02-Cuboctaedru | fe2c4 | 440  | -3221.49838  | 46.1 |
| 1254 | 12v-03-Anticuboh   | fe2c4 | 1716 | -3221.49773  | 46.5 |
| 1255 | 12v-03-Anticuboh   | fe2c4 | 1759 | -3221.49773  | 46.5 |
| 1256 | 12v-03-Anticuboh   | fe2c4 | 1780 | -3221.49773  | 46.5 |
| 1257 | 12v-01-Icos        | fe2c4 | 180  | -3221.497354 | 46.8 |
| 1258 | 12v-01-Icos        | fe2c4 | 190  | -3221.497354 | 46.8 |
| 1259 | 12v-01-Icos        | fe2c4 | 222  | -3221.497354 | 46.8 |
| 1260 | 12v-03-Anticuboh   | fe2c4 | 1070 | -3221.497137 | 46.9 |
| 1261 | 12v-02-Cuboctaedru | fe2c4 | 908  | -3221.497067 | 46.9 |
| 1262 | 12v-02-Cuboctaedru | fe2c4 | 468  | -3221.497055 | 47.0 |
| 1263 | 12v-02-Cuboctaedru | fe2c4 | 496  | -3221.497055 | 47.0 |
| 1264 | 12v-03-Anticuboh   | fe2c4 | 1444 | -3221.496822 | 47.1 |
| 1265 | 12v-03-Anticuboh   | fe2c4 | 1449 | -3221.496485 | 47.3 |
| 1266 | 12v-03-Anticuboh   | fe2c4 | 1881 | -3221.496465 | 47.3 |
| 1267 | 12v-02-Cuboctaedru | fe2c4 | 389  | -3221.496166 | 47.5 |
| 1268 | 12v-03-Anticuboh   | fe2c4 | 1301 | -3221.496133 | 47.5 |
| 1269 | 12v-03-Anticuboh   | fe2c4 | 1882 | -3221.496116 | 47.5 |
| 1270 | 12v-03-Anticuboh   | fe2c4 | 1886 | -3221.495941 | 47.7 |
| 1271 | 12v-02-Cuboctaedru | fe2c4 | 828  | -3221.495897 | 47.7 |
| 1272 | 12v-02-Cuboctaedru | fe2c4 | 834  | -3221.495891 | 47.7 |

|      |                    |       |      |              |      |
|------|--------------------|-------|------|--------------|------|
| 1273 | 12v-03-Anticuboh   | fe2c4 | 1547 | -3221.495597 | 47.9 |
| 1274 | 12v-03-Anticuboh   | fe2c4 | 1477 | -3221.495488 | 47.9 |
| 1275 | 12v-03-Anticuboh   | fe2c4 | 1470 | -3221.495487 | 47.9 |
| 1276 | 12v-01-Icos        | fe2c4 | 117  | -3221.495374 | 48.0 |
| 1277 | 12v-01-Icos        | fe2c4 | 75   | -3221.495374 | 48.0 |
| 1278 | 12v-03-Anticuboh   | fe2c4 | 1465 | -3221.49536  | 48.0 |
| 1279 | 12v-02-Cuboctaedru | fe2c4 | 610  | -3221.495345 | 48.0 |
| 1280 | 12v-02-Cuboctaedru | fe2c4 | 624  | -3221.495345 | 48.0 |
| 1281 | 12v-03-Anticuboh   | fe2c4 | 1721 | -3221.49534  | 48.0 |
| 1282 | 12v-03-Anticuboh   | fe2c4 | 1473 | -3221.495257 | 48.1 |
| 1283 | 12v-01-Icos        | fe2c4 | 110  | -3221.49525  | 48.1 |
| 1284 | 12v-01-Icos        | fe2c4 | 76   | -3221.49525  | 48.1 |
| 1285 | 12v-02-Cuboctaedru | fe2c4 | 647  | -3221.495232 | 48.1 |
| 1286 | 12v-02-Cuboctaedru | fe2c4 | 756  | -3221.495232 | 48.1 |
| 1287 | 12v-02-Cuboctaedru | fe2c4 | 763  | -3221.495232 | 48.1 |
| 1288 | 12v-02-Cuboctaedru | fe2c4 | 787  | -3221.495232 | 48.1 |
| 1289 | 12v-02-Cuboctaedru | fe2c4 | 794  | -3221.495232 | 48.1 |
| 1290 | 12v-02-Cuboctaedru | fe2c4 | 826  | -3221.495232 | 48.1 |
| 1291 | 12v-03-Anticuboh   | fe2c4 | 1894 | -3221.495226 | 48.1 |
| 1292 | 12v-03-Anticuboh   | fe2c4 | 1307 | -3221.495078 | 48.2 |
| 1293 | 12v-02-Cuboctaedru | fe2c4 | 655  | -3221.495021 | 48.2 |
| 1294 | 12v-02-Cuboctaedru | fe2c4 | 784  | -3221.495021 | 48.2 |
| 1295 | 12v-02-Cuboctaedru | fe2c4 | 788  | -3221.495021 | 48.2 |
| 1296 | 12v-03-Anticuboh   | fe2c4 | 1483 | -3221.494506 | 48.6 |
| 1297 | 12v-03-Anticuboh   | fe2c4 | 1757 | -3221.493919 | 48.9 |
| 1298 | 12v-02-Cuboctaedru | fe2c4 | 304  | -3221.49375  | 49.0 |
| 1299 | 12v-02-Cuboctaedru | fe2c4 | 318  | -3221.49375  | 49.0 |
| 1300 | 12v-01-Icos        | fe2c4 | 14   | -3221.493746 | 49.0 |
| 1301 | 12v-01-Icos        | fe2c4 | 1    | -3221.493746 | 49.0 |
| 1302 | 12v-01-Icos        | fe2c4 | 28   | -3221.493746 | 49.0 |
| 1303 | 12v-01-Icos        | fe2c4 | 12   | -3221.493717 | 49.1 |
| 1304 | 12v-01-Icos        | fe2c4 | 15   | -3221.493717 | 49.1 |
| 1305 | 12v-01-Icos        | fe2c4 | 26   | -3221.493717 | 49.1 |
| 1306 | 12v-03-Anticuboh   | fe2c4 | 1809 | -3221.493689 | 49.1 |
| 1307 | 12v-03-Anticuboh   | fe2c4 | 1731 | -3221.493649 | 49.1 |
| 1308 | 12v-03-Anticuboh   | fe2c4 | 1329 | -3221.493647 | 49.1 |
| 1309 | 12v-02-Cuboctaedru | fe2c4 | 448  | -3221.493536 | 49.2 |
| 1310 | 12v-02-Cuboctaedru | fe2c4 | 545  | -3221.493368 | 49.3 |
| 1311 | 12v-02-Cuboctaedru | fe2c4 | 559  | -3221.493368 | 49.3 |
| 1312 | 12v-03-Anticuboh   | fe2c4 | 1906 | -3221.493354 | 49.3 |
| 1313 | 12v-03-Anticuboh   | fe2c4 | 1325 | -3221.493336 | 49.3 |
| 1314 | 12v-02-Cuboctaedru | fe2c4 | 294  | -3221.493091 | 49.4 |
| 1315 | 12v-02-Cuboctaedru | fe2c4 | 303  | -3221.493091 | 49.4 |
| 1316 | 12v-02-Cuboctaedru | fe2c4 | 543  | -3221.492976 | 49.5 |
| 1317 | 12v-02-Cuboctaedru | fe2c4 | 601  | -3221.492976 | 49.5 |
| 1318 | 12v-03-Anticuboh   | fe2c4 | 1683 | -3221.492827 | 49.6 |
| 1319 | 12v-03-Anticuboh   | fe2c4 | 1711 | -3221.492827 | 49.6 |
| 1320 | 12v-03-Anticuboh   | fe2c4 | 1719 | -3221.492827 | 49.6 |
| 1321 | 12v-03-Anticuboh   | fe2c4 | 1239 | -3221.492798 | 49.6 |
| 1322 | 12v-03-Anticuboh   | fe2c4 | 1253 | -3221.492798 | 49.6 |
| 1323 | 12v-03-Anticuboh   | fe2c4 | 1286 | -3221.492798 | 49.6 |

|      |                    |       |      |              |      |
|------|--------------------|-------|------|--------------|------|
| 1324 | 12v-03-Anticuboh   | fe2c4 | 1316 | -3221.492798 | 49.6 |
| 1325 | 12v-03-Anticuboh   | fe2c4 | 1323 | -3221.492798 | 49.6 |
| 1326 | 12v-02-Cuboctaedru | fe2c4 | 839  | -3221.49265  | 49.7 |
| 1327 | 12v-02-Cuboctaedru | fe2c4 | 853  | -3221.49265  | 49.7 |
| 1328 | 12v-02-Cuboctaedru | fe2c4 | 881  | -3221.49265  | 49.7 |
| 1329 | 12v-03-Anticuboh   | fe2c4 | 1491 | -3221.492551 | 49.8 |
| 1330 | 12v-03-Anticuboh   | fe2c4 | 1498 | -3221.492551 | 49.8 |
| 1331 | 12v-03-Anticuboh   | fe2c4 | 1207 | -3221.492512 | 49.8 |
| 1332 | 12v-03-Anticuboh   | fe2c4 | 1256 | -3221.492512 | 49.8 |
| 1333 | 12v-03-Anticuboh   | fe2c4 | 1263 | -3221.492512 | 49.8 |
| 1334 | 12v-01-Icos        | fe2c4 | 177  | -3221.492356 | 49.9 |
| 1335 | 12v-01-Icos        | fe2c4 | 204  | -3221.492356 | 49.9 |
| 1336 | 12v-01-Icos        | fe2c4 | 219  | -3221.492356 | 49.9 |
| 1337 | 12v-01-Icos        | fe2c4 | 243  | -3221.492356 | 49.9 |
| 1338 | 12v-03-Anticuboh   | fe2c4 | 1211 | -3221.492308 | 49.9 |
| 1339 | 12v-03-Anticuboh   | fe2c4 | 1223 | -3221.492308 | 49.9 |
| 1340 | 12v-03-Anticuboh   | fe2c4 | 1251 | -3221.492308 | 49.9 |
| 1341 | 12v-03-Anticuboh   | fe2c4 | 1260 | -3221.492308 | 49.9 |
| 1342 | 12v-03-Anticuboh   | fe2c4 | 1267 | -3221.492308 | 49.9 |
| 1343 | 12v-03-Anticuboh   | fe2c4 | 1321 | -3221.492308 | 49.9 |
| 1344 | 12v-03-Anticuboh   | fe2c4 | 1807 | -3221.492201 | 50.0 |
| 1345 | 12v-03-Anticuboh   | fe2c4 | 1842 | -3221.492201 | 50.0 |
| 1346 | 12v-03-Anticuboh   | fe2c4 | 1907 | -3221.492201 | 50.0 |
| 1347 | 12v-03-Anticuboh   | fe2c4 | 1222 | -3221.492168 | 50.0 |
| 1348 | 12v-02-Cuboctaedru | fe2c4 | 869  | -3221.492124 | 50.0 |
| 1349 | 12v-03-Anticuboh   | fe2c4 | 1846 | -3221.492083 | 50.1 |
| 1350 | 12v-02-Cuboctaedru | fe2c4 | 404  | -3221.492078 | 50.1 |
| 1351 | 12v-02-Cuboctaedru | fe2c4 | 432  | -3221.492078 | 50.1 |
| 1352 | 12v-02-Cuboctaedru | fe2c4 | 437  | -3221.492078 | 50.1 |
| 1353 | 12v-03-Anticuboh   | fe2c4 | 1580 | -3221.491726 | 50.3 |
| 1354 | 12v-01-Icos        | fe2c4 | 124  | -3221.491679 | 50.3 |
| 1355 | 12v-01-Icos        | fe2c4 | 109  | -3221.491626 | 50.4 |
| 1356 | 12v-01-Icos        | fe2c4 | 97   | -3221.491626 | 50.4 |
| 1357 | 12v-02-Cuboctaedru | fe2c4 | 857  | -3221.49161  | 50.4 |
| 1358 | 12v-02-Cuboctaedru | fe2c4 | 895  | -3221.49161  | 50.4 |
| 1359 | 12v-02-Cuboctaedru | fe2c4 | 524  | -3221.491503 | 50.4 |
| 1360 | 12v-02-Cuboctaedru | fe2c4 | 566  | -3221.491502 | 50.4 |
| 1361 | 12v-03-Anticuboh   | fe2c4 | 1539 | -3221.491476 | 50.5 |
| 1362 | 12v-02-Cuboctaedru | fe2c4 | 945  | -3221.491259 | 50.6 |
| 1363 | 12v-02-Cuboctaedru | fe2c4 | 952  | -3221.491259 | 50.6 |
| 1364 | 12v-02-Cuboctaedru | fe2c4 | 946  | -3221.49118  | 50.6 |
| 1365 | 12v-03-Anticuboh   | fe2c4 | 1221 | -3221.491143 | 50.7 |
| 1366 | 12v-02-Cuboctaedru | fe2c4 | 590  | -3221.491111 | 50.7 |
| 1367 | 12v-02-Cuboctaedru | fe2c4 | 708  | -3221.491111 | 50.7 |
| 1368 | 12v-02-Cuboctaedru | fe2c4 | 715  | -3221.491111 | 50.7 |
| 1369 | 12v-02-Cuboctaedru | fe2c4 | 729  | -3221.491111 | 50.7 |
| 1370 | 12v-02-Cuboctaedru | fe2c4 | 736  | -3221.491111 | 50.7 |
| 1371 | 12v-02-Cuboctaedru | fe2c4 | 604  | -3221.491049 | 50.7 |
| 1372 | 12v-02-Cuboctaedru | fe2c4 | 709  | -3221.491049 | 50.7 |
| 1373 | 12v-02-Cuboctaedru | fe2c4 | 716  | -3221.491049 | 50.7 |
| 1374 | 12v-02-Cuboctaedru | fe2c4 | 751  | -3221.491049 | 50.7 |



|      |                    |       |      |              |      |
|------|--------------------|-------|------|--------------|------|
| 1375 | 12v-02-Cuboctaedru | fe2c4 | 821  | -3221.491049 | 50.7 |
| 1376 | 12v-02-Cuboctaedru | fe2c4 | 758  | -3221.491048 | 50.7 |
| 1377 | 12v-03-Anticuboh   | fe2c4 | 1725 | -3221.491014 | 50.7 |
| 1378 | 12v-03-Anticuboh   | fe2c4 | 1746 | -3221.491014 | 50.7 |
| 1379 | 12v-03-Anticuboh   | fe2c4 | 1326 | -3221.490603 | 51.0 |
| 1380 | 12v-03-Anticuboh   | fe2c4 | 1330 | -3221.490329 | 51.2 |
| 1381 | 12v-03-Anticuboh   | fe2c4 | 1364 | -3221.490329 | 51.2 |
| 1382 | 12v-03-Anticuboh   | fe2c4 | 1064 | -3221.489881 | 51.5 |
| 1383 | 12v-03-Anticuboh   | fe2c4 | 1671 | -3221.489644 | 51.6 |
| 1384 | 12v-03-Anticuboh   | fe2c4 | 1713 | -3221.489644 | 51.6 |
| 1385 | 12v-02-Cuboctaedru | fe2c4 | 625  | -3221.489516 | 51.7 |
| 1386 | 12v-02-Cuboctaedru | fe2c4 | 645  | -3221.489516 | 51.7 |
| 1387 | 12v-02-Cuboctaedru | fe2c4 | 792  | -3221.489516 | 51.7 |
| 1388 | 12v-03-Anticuboh   | fe2c4 | 1092 | -3221.489448 | 51.7 |
| 1389 | 12v-03-Anticuboh   | fe2c4 | 1857 | -3221.488046 | 52.6 |
| 1390 | 12v-03-Anticuboh   | fe2c4 | 1269 | -3221.487928 | 52.7 |
| 1391 | 12v-03-Anticuboh   | fe2c4 | 1276 | -3221.487928 | 52.7 |
| 1392 | 12v-03-Anticuboh   | fe2c4 | 1861 | -3221.487855 | 52.7 |
| 1393 | 12v-03-Anticuboh   | fe2c4 | 1868 | -3221.487855 | 52.7 |
| 1394 | 12v-03-Anticuboh   | fe2c4 | 1274 | -3221.487532 | 52.9 |
| 1395 | 12v-03-Anticuboh   | fe2c4 | 1143 | -3221.487452 | 53.0 |
| 1396 | 12v-03-Anticuboh   | fe2c4 | 1171 | -3221.487414 | 53.0 |
| 1397 | 12v-03-Anticuboh   | fe2c4 | 1166 | -3221.487408 | 53.0 |
| 1398 | 12v-03-Anticuboh   | fe2c4 | 1138 | -3221.487402 | 53.0 |
| 1399 | 12v-02-Cuboctaedru | fe2c4 | 391  | -3221.487359 | 53.0 |
| 1400 | 12v-03-Anticuboh   | fe2c4 | 1415 | -3221.486921 | 53.3 |
| 1401 | 12v-03-Anticuboh   | fe2c4 | 1422 | -3221.486921 | 53.3 |
| 1402 | 12v-03-Anticuboh   | fe2c4 | 1429 | -3221.486904 | 53.3 |
| 1403 | 12v-03-Anticuboh   | fe2c4 | 1559 | -3221.486897 | 53.3 |
| 1404 | 12v-02-Cuboctaedru | fe2c4 | 381  | -3221.486872 | 53.3 |
| 1405 | 12v-02-Cuboctaedru | fe2c4 | 405  | -3221.486872 | 53.3 |
| 1406 | 12v-02-Cuboctaedru | fe2c4 | 433  | -3221.486872 | 53.3 |
| 1407 | 12v-02-Cuboctaedru | fe2c4 | 442  | -3221.486787 | 53.4 |
| 1408 | 12v-03-Anticuboh   | fe2c4 | 1655 | -3221.486721 | 53.4 |
| 1409 | 12v-03-Anticuboh   | fe2c4 | 1669 | -3221.486721 | 53.4 |
| 1410 | 12v-02-Cuboctaedru | fe2c4 | 522  | -3221.486642 | 53.5 |
| 1411 | 12v-02-Cuboctaedru | fe2c4 | 622  | -3221.486639 | 53.5 |
| 1412 | 12v-03-Anticuboh   | fe2c4 | 1648 | -3221.486599 | 53.5 |
| 1413 | 12v-03-Anticuboh   | fe2c4 | 1705 | -3221.486599 | 53.5 |
| 1414 | 12v-03-Anticuboh   | fe2c4 | 1712 | -3221.486599 | 53.5 |
| 1415 | 12v-02-Cuboctaedru | fe2c4 | 956  | -3221.486587 | 53.5 |
| 1416 | 12v-02-Cuboctaedru | fe2c4 | 977  | -3221.486587 | 53.5 |
| 1417 | 12v-02-Cuboctaedru | fe2c4 | 983  | -3221.486587 | 53.5 |
| 1418 | 12v-03-Anticuboh   | fe2c4 | 1297 | -3221.486532 | 53.6 |
| 1419 | 12v-03-Anticuboh   | fe2c4 | 1865 | -3221.486532 | 53.6 |
| 1420 | 12v-03-Anticuboh   | fe2c4 | 1876 | -3221.48648  | 53.6 |
| 1421 | 12v-03-Anticuboh   | fe2c4 | 1889 | -3221.486475 | 53.6 |
| 1422 | 12v-03-Anticuboh   | fe2c4 | 1627 | -3221.486371 | 53.7 |
| 1423 | 12v-03-Anticuboh   | fe2c4 | 1618 | -3221.48637  | 53.7 |
| 1424 | 12v-03-Anticuboh   | fe2c4 | 1280 | -3221.486321 | 53.7 |
| 1425 | 12v-02-Cuboctaedru | fe2c4 | 926  | -3221.486081 | 53.8 |

|      |                    |       |      |              |      |
|------|--------------------|-------|------|--------------|------|
| 1426 | 12v-02-Cuboctaedru | fe2c4 | 954  | -3221.486081 | 53.8 |
| 1427 | 12v-02-Cuboctaedru | fe2c4 | 975  | -3221.486081 | 53.8 |
| 1428 | 12v-02-Cuboctaedru | fe2c4 | 570  | -3221.485866 | 54.0 |
| 1429 | 12v-02-Cuboctaedru | fe2c4 | 689  | -3221.485866 | 54.0 |
| 1430 | 12v-02-Cuboctaedru | fe2c4 | 696  | -3221.485866 | 54.0 |
| 1431 | 12v-02-Cuboctaedru | fe2c4 | 754  | -3221.485866 | 54.0 |
| 1432 | 12v-02-Cuboctaedru | fe2c4 | 761  | -3221.485866 | 54.0 |
| 1433 | 12v-02-Cuboctaedru | fe2c4 | 824  | -3221.485866 | 54.0 |
| 1434 | 12v-03-Anticuboh   | fe2c4 | 1249 | -3221.485138 | 54.4 |
| 1435 | 12v-03-Anticuboh   | fe2c4 | 1271 | -3221.485138 | 54.4 |
| 1436 | 12v-03-Anticuboh   | fe2c4 | 1319 | -3221.485138 | 54.4 |
| 1437 | 12v-02-Cuboctaedru | fe2c4 | 455  | -3221.484954 | 54.5 |
| 1438 | 12v-02-Cuboctaedru | fe2c4 | 694  | -3221.484915 | 54.6 |
| 1439 | 12v-02-Cuboctaedru | fe2c4 | 635  | -3221.484894 | 54.6 |
| 1440 | 12v-03-Anticuboh   | fe2c4 | 1909 | -3221.484825 | 54.6 |
| 1441 | 12v-03-Anticuboh   | fe2c4 | 1566 | -3221.484764 | 54.7 |
| 1442 | 12v-03-Anticuboh   | fe2c4 | 1594 | -3221.484764 | 54.7 |
| 1443 | 12v-03-Anticuboh   | fe2c4 | 1609 | -3221.484764 | 54.7 |
| 1444 | 12v-02-Cuboctaedru | fe2c4 | 965  | -3221.484433 | 54.9 |
| 1445 | 12v-03-Anticuboh   | fe2c4 | 1885 | -3221.484352 | 54.9 |
| 1446 | 12v-02-Cuboctaedru | fe2c4 | 890  | -3221.484342 | 54.9 |
| 1447 | 12v-01-Icos        | fe2c4 | 152  | -3221.484324 | 54.9 |
| 1448 | 12v-01-Icos        | fe2c4 | 156  | -3221.484324 | 54.9 |
| 1449 | 12v-01-Icos        | fe2c4 | 205  | -3221.484324 | 54.9 |
| 1450 | 12v-03-Anticuboh   | fe2c4 | 1302 | -3221.484243 | 55.0 |
| 1451 | 12v-02-Cuboctaedru | fe2c4 | 587  | -3221.484181 | 55.0 |
| 1452 | 12v-02-Cuboctaedru | fe2c4 | 686  | -3221.484181 | 55.0 |
| 1453 | 12v-02-Cuboctaedru | fe2c4 | 804  | -3221.484181 | 55.0 |
| 1454 | 12v-03-Anticuboh   | fe2c4 | 1562 | -3221.484055 | 55.1 |
| 1455 | 12v-03-Anticuboh   | fe2c4 | 1572 | -3221.484055 | 55.1 |
| 1456 | 12v-03-Anticuboh   | fe2c4 | 1590 | -3221.484055 | 55.1 |
| 1457 | 12v-02-Cuboctaedru | fe2c4 | 612  | -3221.484015 | 55.1 |
| 1458 | 12v-02-Cuboctaedru | fe2c4 | 714  | -3221.484015 | 55.1 |
| 1459 | 12v-02-Cuboctaedru | fe2c4 | 721  | -3221.484015 | 55.1 |
| 1460 | 12v-03-Anticuboh   | fe2c4 | 1605 | -3221.483993 | 55.2 |
| 1461 | 12v-02-Cuboctaedru | fe2c4 | 844  | -3221.483959 | 55.2 |
| 1462 | 12v-02-Cuboctaedru | fe2c4 | 910  | -3221.483956 | 55.2 |
| 1463 | 12v-02-Cuboctaedru | fe2c4 | 412  | -3221.483904 | 55.2 |
| 1464 | 12v-03-Anticuboh   | fe2c4 | 1443 | -3221.483889 | 55.2 |
| 1465 | 12v-03-Anticuboh   | fe2c4 | 1448 | -3221.483801 | 55.3 |
| 1466 | 12v-01-Icos        | fe2c4 | 182  | -3221.483791 | 55.3 |
| 1467 | 12v-01-Icos        | fe2c4 | 183  | -3221.483791 | 55.3 |
| 1468 | 12v-01-Icos        | fe2c4 | 224  | -3221.483791 | 55.3 |
| 1469 | 12v-02-Cuboctaedru | fe2c4 | 901  | -3221.483578 | 55.4 |
| 1470 | 12v-02-Cuboctaedru | fe2c4 | 508  | -3221.483562 | 55.4 |
| 1471 | 12v-02-Cuboctaedru | fe2c4 | 884  | -3221.48327  | 55.6 |
| 1472 | 12v-02-Cuboctaedru | fe2c4 | 898  | -3221.48327  | 55.6 |
| 1473 | 12v-02-Cuboctaedru | fe2c4 | 900  | -3221.483056 | 55.7 |
| 1474 | 12v-02-Cuboctaedru | fe2c4 | 417  | -3221.483022 | 55.8 |
| 1475 | 12v-02-Cuboctaedru | fe2c4 | 459  | -3221.483022 | 55.8 |
| 1476 | 12v-02-Cuboctaedru | fe2c4 | 472  | -3221.483022 | 55.8 |

|      |                    |       |      |              |      |
|------|--------------------|-------|------|--------------|------|
| 1477 | 12v-02-Cuboctaedru | fe2c4 | 486  | -3221.483022 | 55.8 |
| 1478 | 12v-02-Cuboctaedru | fe2c4 | 420  | -3221.483016 | 55.8 |
| 1479 | 12v-02-Cuboctaedru | fe2c4 | 423  | -3221.483016 | 55.8 |
| 1480 | 12v-02-Cuboctaedru | fe2c4 | 462  | -3221.483016 | 55.8 |
| 1481 | 12v-02-Cuboctaedru | fe2c4 | 620  | -3221.482504 | 56.1 |
| 1482 | 12v-02-Cuboctaedru | fe2c4 | 725  | -3221.482504 | 56.1 |
| 1483 | 12v-03-Anticuboh   | fe2c4 | 1359 | -3221.482328 | 56.2 |
| 1484 | 12v-02-Cuboctaedru | fe2c4 | 944  | -3221.482246 | 56.2 |
| 1485 | 12v-02-Cuboctaedru | fe2c4 | 864  | -3221.482193 | 56.3 |
| 1486 | 12v-02-Cuboctaedru | fe2c4 | 871  | -3221.482193 | 56.3 |
| 1487 | 12v-02-Cuboctaedru | fe2c4 | 913  | -3221.482193 | 56.3 |
| 1488 | 12v-03-Anticuboh   | fe2c4 | 1361 | -3221.482101 | 56.3 |
| 1489 | 12v-03-Anticuboh   | fe2c4 | 1389 | -3221.482095 | 56.3 |
| 1490 | 12v-02-Cuboctaedru | fe2c4 | 973  | -3221.482093 | 56.3 |
| 1491 | 12v-02-Cuboctaedru | fe2c4 | 877  | -3221.481931 | 56.4 |
| 1492 | 12v-02-Cuboctaedru | fe2c4 | 866  | -3221.481828 | 56.5 |
| 1493 | 12v-02-Cuboctaedru | fe2c4 | 878  | -3221.481828 | 56.5 |
| 1494 | 12v-02-Cuboctaedru | fe2c4 | 915  | -3221.481828 | 56.5 |
| 1495 | 12v-01-Icos        | fe2c4 | 148  | -3221.481608 | 56.6 |
| 1496 | 12v-01-Icos        | fe2c4 | 239  | -3221.481608 | 56.6 |
| 1497 | 12v-02-Cuboctaedru | fe2c4 | 875  | -3221.481559 | 56.7 |
| 1498 | 12v-02-Cuboctaedru | fe2c4 | 886  | -3221.481552 | 56.7 |
| 1499 | 12v-01-Icos        | fe2c4 | 161  | -3221.48098  | 57.0 |
| 1500 | 12v-01-Icos        | fe2c4 | 184  | -3221.48098  | 57.0 |
| 1501 | 12v-02-Cuboctaedru | fe2c4 | 974  | -3221.480854 | 57.1 |
| 1502 | 12v-02-Cuboctaedru | fe2c4 | 961  | -3221.480853 | 57.1 |
| 1503 | 12v-02-Cuboctaedru | fe2c4 | 953  | -3221.480851 | 57.1 |
| 1504 | 12v-03-Anticuboh   | fe2c4 | 1332 | -3221.480659 | 57.2 |
| 1505 | 12v-03-Anticuboh   | fe2c4 | 1402 | -3221.480659 | 57.2 |
| 1506 | 12v-03-Anticuboh   | fe2c4 | 1336 | -3221.480466 | 57.4 |
| 1507 | 12v-03-Anticuboh   | fe2c4 | 1406 | -3221.480466 | 57.4 |
| 1508 | 12v-01-Icos        | fe2c4 | 231  | -3221.48045  | 57.4 |
| 1509 | 12v-01-Icos        | fe2c4 | 154  | -3221.480395 | 57.4 |
| 1510 | 12v-01-Icos        | fe2c4 | 226  | -3221.480395 | 57.4 |
| 1511 | 12v-02-Cuboctaedru | fe2c4 | 528  | -3221.480362 | 57.4 |
| 1512 | 12v-02-Cuboctaedru | fe2c4 | 550  | -3221.480362 | 57.4 |
| 1513 | 12v-02-Cuboctaedru | fe2c4 | 643  | -3221.480362 | 57.4 |
| 1514 | 12v-02-Cuboctaedru | fe2c4 | 662  | -3221.480362 | 57.4 |
| 1515 | 12v-02-Cuboctaedru | fe2c4 | 776  | -3221.480362 | 57.4 |
| 1516 | 12v-02-Cuboctaedru | fe2c4 | 504  | -3221.480272 | 57.5 |
| 1517 | 12v-02-Cuboctaedru | fe2c4 | 819  | -3221.479504 | 58.0 |
| 1518 | 12v-02-Cuboctaedru | fe2c4 | 388  | -3221.479411 | 58.0 |
| 1519 | 12v-03-Anticuboh   | fe2c4 | 1583 | -3221.479085 | 58.2 |
| 1520 | 12v-03-Anticuboh   | fe2c4 | 1597 | -3221.479085 | 58.2 |
| 1521 | 12v-02-Cuboctaedru | fe2c4 | 582  | -3221.478864 | 58.4 |
| 1522 | 12v-02-Cuboctaedru | fe2c4 | 765  | -3221.478786 | 58.4 |
| 1523 | 12v-02-Cuboctaedru | fe2c4 | 482  | -3221.478692 | 58.5 |
| 1524 | 12v-02-Cuboctaedru | fe2c4 | 503  | -3221.478692 | 58.5 |
| 1525 | 12v-03-Anticuboh   | fe2c4 | 1657 | -3221.478412 | 58.7 |
| 1526 | 12v-03-Anticuboh   | fe2c4 | 1685 | -3221.478396 | 58.7 |
| 1527 | 12v-02-Cuboctaedru | fe2c4 | 525  | -3221.478361 | 58.7 |

|      |                                  |              |      |
|------|----------------------------------|--------------|------|
| 1528 | 12v-02-Cuboctaedru — fe2c4 — 630 | -3221.478361 | 58.7 |
| 1529 | 12v-02-Cuboctaedru — fe2c4 — 892 | -3221.478191 | 58.8 |
| 1530 | 12v-03-Anticuboh — fe2c4 — 1374  | -3221.477428 | 59.3 |
| 1531 | 12v-01-Icos — fe2c4 — 142        | -3221.477348 | 59.3 |
| 1532 | 12v-01-Icos — fe2c4 — 153        | -3221.477348 | 59.3 |
| 1533 | 12v-02-Cuboctaedru — fe2c4 — 409 | -3221.477142 | 59.5 |
| 1534 | 12v-02-Cuboctaedru — fe2c4 — 919 | -3221.476727 | 59.7 |
| 1535 | 12v-02-Cuboctaedru — fe2c4 — 887 | -3221.476618 | 59.8 |
| 1536 | 12v-02-Cuboctaedru — fe2c4 — 924 | -3221.476618 | 59.8 |
| 1537 | 12v-03-Anticuboh — fe2c4 — 1764  | -3221.476549 | 59.8 |
| 1538 | 12v-02-Cuboctaedru — fe2c4 — 626 | -3221.47646  | 59.9 |
| 1539 | 12v-02-Cuboctaedru — fe2c4 — 735 | -3221.47646  | 59.9 |
| 1540 | 12v-02-Cuboctaedru — fe2c4 — 742 | -3221.47646  | 59.9 |
| 1541 | 12v-03-Anticuboh — fe2c4 — 1368  | -3221.476014 | 60.2 |
| 1542 | 12v-03-Anticuboh — fe2c4 — 1626  | -3221.475312 | 60.6 |
| 1543 | 12v-03-Anticuboh — fe2c4 — 1758  | -3221.475312 | 60.6 |
| 1544 | 12v-03-Anticuboh — fe2c4 — 1658  | -3221.474885 | 60.9 |
| 1545 | 12v-02-Cuboctaedru — fe2c4 — 865 | -3221.474696 | 61.0 |
| 1546 | 12v-02-Cuboctaedru — fe2c4 — 914 | -3221.474696 | 61.0 |
| 1547 | 12v-02-Cuboctaedru — fe2c4 — 920 | -3221.474696 | 61.0 |
| 1548 | 12v-02-Cuboctaedru — fe2c4 — 964 | -3221.474663 | 61.0 |
| 1549 | 12v-02-Cuboctaedru — fe2c4 — 905 | -3221.474626 | 61.0 |
| 1550 | 12v-01-Icos — fe2c4 — 141        | -3221.474125 | 61.3 |
| 1551 | 12v-03-Anticuboh — fe2c4 — 1681  | -3221.474091 | 61.4 |
| 1552 | 12v-03-Anticuboh — fe2c4 — 1761  | -3221.474091 | 61.4 |
| 1553 | 12v-03-Anticuboh — fe2c4 — 1767  | -3221.474091 | 61.4 |
| 1554 | 12v-03-Anticuboh — fe2c4 — 1788  | -3221.474091 | 61.4 |
| 1555 | 12v-02-Cuboctaedru — fe2c4 — 618 | -3221.474084 | 61.4 |
| 1556 | 12v-02-Cuboctaedru — fe2c4 — 638 | -3221.474084 | 61.4 |
| 1557 | 12v-02-Cuboctaedru — fe2c4 — 771 | -3221.474084 | 61.4 |
| 1558 | 12v-03-Anticuboh — fe2c4 — 1054  | -3221.473869 | 61.5 |
| 1559 | 12v-03-Anticuboh — fe2c4 — 1033  | -3221.473867 | 61.5 |
| 1560 | 12v-03-Anticuboh — fe2c4 — 1103  | -3221.473862 | 61.5 |
| 1561 | 12v-01-Icos — fe2c4 — 74         | -3221.473855 | 61.5 |
| 1562 | 12v-01-Icos — fe2c4 — 95         | -3221.473855 | 61.5 |
| 1563 | 12v-03-Anticuboh — fe2c4 — 1345  | -3221.473656 | 61.6 |
| 1564 | 12v-03-Anticuboh — fe2c4 — 1352  | -3221.473656 | 61.6 |
| 1565 | 12v-01-Icos — fe2c4 — 145        | -3221.473449 | 61.8 |
| 1566 | 12v-03-Anticuboh — fe2c4 — 1680  | -3221.472042 | 62.7 |
| 1567 | 12v-03-Anticuboh — fe2c4 — 1777  | -3221.472042 | 62.7 |
| 1568 | 12v-02-Cuboctaedru — fe2c4 — 893 | -3221.4719   | 62.7 |
| 1569 | 12v-02-Cuboctaedru — fe2c4 — 925 | -3221.471371 | 63.1 |
| 1570 | 12v-02-Cuboctaedru — fe2c4 — 960 | -3221.471363 | 63.1 |
| 1571 | 12v-03-Anticuboh — fe2c4 — 1617  | -3221.471345 | 63.1 |
| 1572 | 12v-03-Anticuboh — fe2c4 — 1621  | -3221.471209 | 63.2 |
| 1573 | 12v-03-Anticuboh — fe2c4 — 1646  | -3221.471209 | 63.2 |
| 1574 | 12v-03-Anticuboh — fe2c4 — 1768  | -3221.471209 | 63.2 |
| 1575 | 12v-03-Anticuboh — fe2c4 — 1789  | -3221.471209 | 63.2 |
| 1576 | 12v-03-Anticuboh — fe2c4 — 1342  | -3221.470885 | 63.4 |
| 1577 | 12v-03-Anticuboh — fe2c4 — 1350  | -3221.470885 | 63.4 |
| 1578 | 12v-03-Anticuboh — fe2c4 — 1357  | -3221.470885 | 63.4 |

|      |                    |       |      |              |      |
|------|--------------------|-------|------|--------------|------|
| 1579 | 12v-03-Anticuboh   | fe2c4 | 1420 | -3221.470885 | 63.4 |
| 1580 | 12v-03-Anticuboh   | fe2c4 | 1427 | -3221.470885 | 63.4 |
| 1581 | 12v-03-Anticuboh   | fe2c4 | 1346 | -3221.470869 | 63.4 |
| 1582 | 12v-03-Anticuboh   | fe2c4 | 1353 | -3221.470869 | 63.4 |
| 1583 | 12v-03-Anticuboh   | fe2c4 | 1156 | -3221.470742 | 63.5 |
| 1584 | 12v-02-Cuboctaedru | fe2c4 | 701  | -3221.470719 | 63.5 |
| 1585 | 12v-02-Cuboctaedru | fe2c4 | 722  | -3221.470719 | 63.5 |
| 1586 | 12v-02-Cuboctaedru | fe2c4 | 941  | -3221.470511 | 63.6 |
| 1587 | 12v-02-Cuboctaedru | fe2c4 | 959  | -3221.470511 | 63.6 |
| 1588 | 12v-02-Cuboctaedru | fe2c4 | 980  | -3221.470511 | 63.6 |
| 1589 | 12v-02-Cuboctaedru | fe2c4 | 883  | -3221.470499 | 63.6 |
| 1590 | 12v-02-Cuboctaedru | fe2c4 | 579  | -3221.470454 | 63.6 |
| 1591 | 12v-02-Cuboctaedru | fe2c4 | 684  | -3221.470454 | 63.6 |
| 1592 | 12v-02-Cuboctaedru | fe2c4 | 768  | -3221.470454 | 63.6 |
| 1593 | 12v-02-Cuboctaedru | fe2c4 | 521  | -3221.470357 | 63.7 |
| 1594 | 12v-02-Cuboctaedru | fe2c4 | 734  | -3221.470357 | 63.7 |
| 1595 | 12v-02-Cuboctaedru | fe2c4 | 741  | -3221.470357 | 63.7 |
| 1596 | 12v-03-Anticuboh   | fe2c4 | 1722 | -3221.470273 | 63.8 |
| 1597 | 12v-03-Anticuboh   | fe2c4 | 1728 | -3221.470245 | 63.8 |
| 1598 | 12v-03-Anticuboh   | fe2c4 | 1659 | -3221.470216 | 63.8 |
| 1599 | 12v-02-Cuboctaedru | fe2c4 | 402  | -3221.469997 | 63.9 |
| 1600 | 12v-02-Cuboctaedru | fe2c4 | 444  | -3221.469997 | 63.9 |
| 1601 | 12v-03-Anticuboh   | fe2c4 | 1830 | -3221.469899 | 64.0 |
| 1602 | 12v-03-Anticuboh   | fe2c4 | 1837 | -3221.469899 | 64.0 |
| 1603 | 12v-03-Anticuboh   | fe2c4 | 1880 | -3221.469899 | 64.0 |
| 1604 | 12v-02-Cuboctaedru | fe2c4 | 835  | -3221.469873 | 64.0 |
| 1605 | 12v-02-Cuboctaedru | fe2c4 | 849  | -3221.469873 | 64.0 |
| 1606 | 12v-02-Cuboctaedru | fe2c4 | 856  | -3221.469873 | 64.0 |
| 1607 | 12v-03-Anticuboh   | fe2c4 | 1401 | -3221.469844 | 64.0 |
| 1608 | 12v-03-Anticuboh   | fe2c4 | 1445 | -3221.469844 | 64.0 |
| 1609 | 12v-03-Anticuboh   | fe2c4 | 1331 | -3221.469843 | 64.0 |
| 1610 | 12v-03-Anticuboh   | fe2c4 | 1457 | -3221.469686 | 64.1 |
| 1611 | 12v-03-Anticuboh   | fe2c4 | 1520 | -3221.469686 | 64.1 |
| 1612 | 12v-03-Anticuboh   | fe2c4 | 1530 | -3221.469686 | 64.1 |
| 1613 | 12v-03-Anticuboh   | fe2c4 | 1613 | -3221.469686 | 64.1 |
| 1614 | 12v-02-Cuboctaedru | fe2c4 | 896  | -3221.469004 | 64.6 |
| 1615 | 12v-02-Cuboctaedru | fe2c4 | 899  | -3221.469004 | 64.6 |
| 1616 | 12v-03-Anticuboh   | fe2c4 | 1160 | -3221.468976 | 64.6 |
| 1617 | 12v-03-Anticuboh   | fe2c4 | 1149 | -3221.468601 | 64.8 |
| 1618 | 12v-03-Anticuboh   | fe2c4 | 1177 | -3221.468574 | 64.8 |
| 1619 | 12v-03-Anticuboh   | fe2c4 | 1656 | -3221.468408 | 64.9 |
| 1620 | 12v-03-Anticuboh   | fe2c4 | 1089 | -3221.467396 | 65.6 |
| 1621 | 12v-03-Anticuboh   | fe2c4 | 1142 | -3221.467046 | 65.8 |
| 1622 | 12v-03-Anticuboh   | fe2c4 | 1398 | -3221.465683 | 66.6 |
| 1623 | 12v-02-Cuboctaedru | fe2c4 | 430  | -3221.465494 | 66.8 |
| 1624 | 12v-03-Anticuboh   | fe2c4 | 1488 | -3221.465353 | 66.8 |
| 1625 | 12v-03-Anticuboh   | fe2c4 | 1565 | -3221.465353 | 66.8 |
| 1626 | 12v-03-Anticuboh   | fe2c4 | 1593 | -3221.465353 | 66.8 |
| 1627 | 12v-02-Cuboctaedru | fe2c4 | 656  | -3221.465307 | 66.9 |
| 1628 | 12v-02-Cuboctaedru | fe2c4 | 770  | -3221.465307 | 66.9 |
| 1629 | 12v-02-Cuboctaedru | fe2c4 | 803  | -3221.465307 | 66.9 |

|      |                    |       |      |              |      |
|------|--------------------|-------|------|--------------|------|
| 1630 | 12v-02-Cuboctaedru | fe2c4 | 940  | -3221.465271 | 66.9 |
| 1631 | 12v-02-Cuboctaedru | fe2c4 | 702  | -3221.465122 | 67.0 |
| 1632 | 12v-02-Cuboctaedru | fe2c4 | 807  | -3221.465122 | 67.0 |
| 1633 | 12v-02-Cuboctaedru | fe2c4 | 744  | -3221.465121 | 67.0 |
| 1634 | 12v-02-Cuboctaedru | fe2c4 | 641  | -3221.464826 | 67.2 |
| 1635 | 12v-02-Cuboctaedru | fe2c4 | 746  | -3221.464826 | 67.2 |
| 1636 | 12v-02-Cuboctaedru | fe2c4 | 766  | -3221.464826 | 67.2 |
| 1637 | 12v-02-Cuboctaedru | fe2c4 | 774  | -3221.464826 | 67.2 |
| 1638 | 12v-02-Cuboctaedru | fe2c4 | 809  | -3221.464826 | 67.2 |
| 1639 | 12v-03-Anticuboh   | fe2c4 | 1474 | -3221.464711 | 67.3 |
| 1640 | 12v-03-Anticuboh   | fe2c4 | 1201 | -3221.464278 | 67.5 |
| 1641 | 12v-03-Anticuboh   | fe2c4 | 1179 | -3221.46427  | 67.5 |
| 1642 | 12v-03-Anticuboh   | fe2c4 | 1151 | -3221.464266 | 67.5 |
| 1643 | 12v-03-Anticuboh   | fe2c4 | 1308 | -3221.463165 | 68.2 |
| 1644 | 12v-03-Anticuboh   | fe2c4 | 1162 | -3221.463118 | 68.3 |
| 1645 | 12v-02-Cuboctaedru | fe2c4 | 990  | -3221.463095 | 68.3 |
| 1646 | 12v-03-Anticuboh   | fe2c4 | 1703 | -3221.462928 | 68.4 |
| 1647 | 12v-03-Anticuboh   | fe2c4 | 1753 | -3221.462928 | 68.4 |
| 1648 | 12v-03-Anticuboh   | fe2c4 | 1296 | -3221.462797 | 68.5 |
| 1649 | 12v-03-Anticuboh   | fe2c4 | 1303 | -3221.462797 | 68.5 |
| 1650 | 12v-02-Cuboctaedru | fe2c4 | 950  | -3221.462758 | 68.5 |
| 1651 | 12v-02-Cuboctaedru | fe2c4 | 986  | -3221.462758 | 68.5 |
| 1652 | 12v-03-Anticuboh   | fe2c4 | 1141 | -3221.462591 | 68.6 |
| 1653 | 12v-03-Anticuboh   | fe2c4 | 1169 | -3221.462588 | 68.6 |
| 1654 | 12v-03-Anticuboh   | fe2c4 | 1175 | -3221.462588 | 68.6 |
| 1655 | 12v-03-Anticuboh   | fe2c4 | 1147 | -3221.462584 | 68.6 |
| 1656 | 12v-02-Cuboctaedru | fe2c4 | 652  | -3221.46226  | 68.8 |
| 1657 | 12v-03-Anticuboh   | fe2c4 | 1553 | -3221.461845 | 69.1 |
| 1658 | 12v-02-Cuboctaedru | fe2c4 | 360  | -3221.461767 | 69.1 |
| 1659 | 12v-02-Cuboctaedru | fe2c4 | 374  | -3221.461767 | 69.1 |
| 1660 | 12v-02-Cuboctaedru | fe2c4 | 767  | -3221.461672 | 69.2 |
| 1661 | 12v-02-Cuboctaedru | fe2c4 | 781  | -3221.461672 | 69.2 |
| 1662 | 12v-02-Cuboctaedru | fe2c4 | 816  | -3221.461672 | 69.2 |
| 1663 | 12v-02-Cuboctaedru | fe2c4 | 623  | -3221.461631 | 69.2 |
| 1664 | 12v-02-Cuboctaedru | fe2c4 | 627  | -3221.461631 | 69.2 |
| 1665 | 12v-02-Cuboctaedru | fe2c4 | 367  | -3221.461571 | 69.2 |
| 1666 | 12v-03-Anticuboh   | fe2c4 | 1720 | -3221.461338 | 69.4 |
| 1667 | 12v-02-Cuboctaedru | fe2c4 | 634  | -3221.461191 | 69.5 |
| 1668 | 12v-02-Cuboctaedru | fe2c4 | 813  | -3221.46119  | 69.5 |
| 1669 | 12v-02-Cuboctaedru | fe2c4 | 572  | -3221.461115 | 69.5 |
| 1670 | 12v-02-Cuboctaedru | fe2c4 | 682  | -3221.461115 | 69.5 |
| 1671 | 12v-02-Cuboctaedru | fe2c4 | 691  | -3221.461115 | 69.5 |
| 1672 | 12v-02-Cuboctaedru | fe2c4 | 747  | -3221.461115 | 69.5 |
| 1673 | 12v-02-Cuboctaedru | fe2c4 | 810  | -3221.461115 | 69.5 |
| 1674 | 12v-01-Icos        | fe2c4 | 155  | -3221.460774 | 69.7 |
| 1675 | 12v-01-Icos        | fe2c4 | 176  | -3221.460774 | 69.7 |
| 1676 | 12v-01-Icos        | fe2c4 | 218  | -3221.460774 | 69.7 |
| 1677 | 12v-03-Anticuboh   | fe2c4 | 1234 | -3221.460595 | 69.8 |
| 1678 | 12v-03-Anticuboh   | fe2c4 | 1306 | -3221.460595 | 69.8 |
| 1679 | 12v-03-Anticuboh   | fe2c4 | 1311 | -3221.460595 | 69.8 |
| 1680 | 12v-02-Cuboctaedru | fe2c4 | 554  | -3221.460342 | 70.0 |

|      |                                  |              |      |
|------|----------------------------------|--------------|------|
| 1681 | 12v-02-Cuboctaedru — fe2c4 — 561 | -3221.460342 | 70.0 |
| 1682 | 12v-03-Anticuboh — fe2c4 — 1466  | -3221.460339 | 70.0 |
| 1683 | 12v-03-Anticuboh — fe2c4 — 1564  | -3221.460236 | 70.1 |
| 1684 | 12v-03-Anticuboh — fe2c4 — 1551  | -3221.460234 | 70.1 |
| 1685 | 12v-03-Anticuboh — fe2c4 — 1592  | -3221.460233 | 70.1 |
| 1686 | 12v-03-Anticuboh — fe2c4 — 1283  | -3221.46019  | 70.1 |
| 1687 | 12v-03-Anticuboh — fe2c4 — 1891  | -3221.460109 | 70.1 |
| 1688 | 12v-03-Anticuboh — fe2c4 — 1555  | -3221.460066 | 70.2 |
| 1689 | 12v-02-Cuboctaedru — fe2c4 — 931 | -3221.459685 | 70.4 |
| 1690 | 12v-02-Cuboctaedru — fe2c4 — 512 | -3221.459603 | 70.5 |
| 1691 | 12v-02-Cuboctaedru — fe2c4 — 862 | -3221.459127 | 70.8 |
| 1692 | 12v-02-Cuboctaedru — fe2c4 — 911 | -3221.459127 | 70.8 |
| 1693 | 12v-01-Icos — fe2c4 — 147        | -3221.458364 | 71.2 |
| 1694 | 12v-02-Cuboctaedru — fe2c4 — 436 | -3221.457765 | 71.6 |
| 1695 | 12v-02-Cuboctaedru — fe2c4 — 463 | -3221.457765 | 71.6 |
| 1696 | 12v-02-Cuboctaedru — fe2c4 — 491 | -3221.457765 | 71.6 |
| 1697 | 12v-03-Anticuboh — fe2c4 — 1548  | -3221.457003 | 72.1 |
| 1698 | 12v-03-Anticuboh — fe2c4 — 1570  | -3221.457003 | 72.1 |
| 1699 | 12v-02-Cuboctaedru — fe2c4 — 380 | -3221.456991 | 72.1 |
| 1700 | 12v-03-Anticuboh — fe2c4 — 1487  | -3221.456973 | 72.1 |
| 1701 | 12v-03-Anticuboh — fe2c4 — 1550  | -3221.456973 | 72.1 |
| 1702 | 12v-02-Cuboctaedru — fe2c4 — 530 | -3221.456916 | 72.1 |
| 1703 | 12v-02-Cuboctaedru — fe2c4 — 670 | -3221.456916 | 72.1 |
| 1704 | 12v-02-Cuboctaedru — fe2c4 — 769 | -3221.456916 | 72.1 |
| 1705 | 12v-02-Cuboctaedru — fe2c4 — 948 | -3221.456869 | 72.2 |
| 1706 | 12v-02-Cuboctaedru — fe2c4 — 958 | -3221.456869 | 72.2 |
| 1707 | 12v-02-Cuboctaedru — fe2c4 — 979 | -3221.456869 | 72.2 |
| 1708 | 12v-03-Anticuboh — fe2c4 — 1637  | -3221.455108 | 73.3 |
| 1709 | 12v-03-Anticuboh — fe2c4 — 1679  | -3221.455108 | 73.3 |
| 1710 | 12v-03-Anticuboh — fe2c4 — 1454  | -3221.454086 | 73.9 |
| 1711 | 12v-03-Anticuboh — fe2c4 — 1461  | -3221.454086 | 73.9 |
| 1712 | 12v-03-Anticuboh — fe2c4 — 1524  | -3221.454086 | 73.9 |
| 1713 | 12v-03-Anticuboh — fe2c4 — 1531  | -3221.45385  | 74.1 |
| 1714 | 12v-02-Cuboctaedru — fe2c4 — 937 | -3221.452866 | 74.7 |
| 1715 | 12v-02-Cuboctaedru — fe2c4 — 949 | -3221.452866 | 74.7 |
| 1716 | 12v-03-Anticuboh — fe2c4 — 1878  | -3221.452573 | 74.9 |
| 1717 | 12v-03-Anticuboh — fe2c4 — 1871  | -3221.452572 | 74.9 |
| 1718 | 12v-02-Cuboctaedru — fe2c4 — 523 | -3221.451494 | 75.5 |
| 1719 | 12v-02-Cuboctaedru — fe2c4 — 727 | -3221.451494 | 75.5 |
| 1720 | 12v-02-Cuboctaedru — fe2c4 — 894 | -3221.451382 | 75.6 |
| 1721 | 12v-03-Anticuboh — fe2c4 — 1140  | -3221.450973 | 75.9 |
| 1722 | 12v-03-Anticuboh — fe2c4 — 1544  | -3221.45062  | 76.1 |
| 1723 | 12v-03-Anticuboh — fe2c4 — 1864  | -3221.450577 | 76.1 |
| 1724 | 12v-03-Anticuboh — fe2c4 — 1892  | -3221.450577 | 76.1 |
| 1725 | 12v-03-Anticuboh — fe2c4 — 1281  | -3221.450478 | 76.2 |
| 1726 | 12v-03-Anticuboh — fe2c4 — 1309  | -3221.450473 | 76.2 |
| 1727 | 12v-03-Anticuboh — fe2c4 — 1369  | -3221.45044  | 76.2 |
| 1728 | 12v-03-Anticuboh — fe2c4 — 1400  | -3221.450429 | 76.2 |
| 1729 | 12v-03-Anticuboh — fe2c4 — 1896  | -3221.450381 | 76.2 |
| 1730 | 12v-03-Anticuboh — fe2c4 — 1399  | -3221.450369 | 76.3 |
| 1731 | 12v-02-Cuboctaedru — fe2c4 — 546 | -3221.450364 | 76.3 |

|      |                    |       |      |              |      |
|------|--------------------|-------|------|--------------|------|
| 1732 | 12v-02-Cuboctaedru | fe2c4 | 616  | -3221.450364 | 76.3 |
| 1733 | 12v-03-Anticuboh   | fe2c4 | 1395 | -3221.449991 | 76.5 |
| 1734 | 12v-03-Anticuboh   | fe2c4 | 1396 | -3221.449683 | 76.7 |
| 1735 | 12v-03-Anticuboh   | fe2c4 | 1375 | -3221.449025 | 77.1 |
| 1736 | 12v-02-Cuboctaedru | fe2c4 | 292  | -3221.449018 | 77.1 |
| 1737 | 12v-02-Cuboctaedru | fe2c4 | 490  | -3221.448995 | 77.1 |
| 1738 | 12v-02-Cuboctaedru | fe2c4 | 476  | -3221.44898  | 77.1 |
| 1739 | 12v-03-Anticuboh   | fe2c4 | 1365 | -3221.448701 | 77.3 |
| 1740 | 12v-02-Cuboctaedru | fe2c4 | 450  | -3221.44794  | 77.8 |
| 1741 | 12v-02-Cuboctaedru | fe2c4 | 470  | -3221.44794  | 77.8 |
| 1742 | 12v-02-Cuboctaedru | fe2c4 | 484  | -3221.44794  | 77.8 |
| 1743 | 12v-02-Cuboctaedru | fe2c4 | 400  | -3221.447738 | 77.9 |
| 1744 | 12v-02-Cuboctaedru | fe2c4 | 666  | -3221.447448 | 78.1 |
| 1745 | 12v-02-Cuboctaedru | fe2c4 | 633  | -3221.447135 | 78.3 |
| 1746 | 12v-02-Cuboctaedru | fe2c4 | 778  | -3221.447135 | 78.3 |
| 1747 | 12v-03-Anticuboh   | fe2c4 | 1762 | -3221.446674 | 78.6 |
| 1748 | 12v-03-Anticuboh   | fe2c4 | 1058 | -3221.446597 | 78.6 |
| 1749 | 12v-03-Anticuboh   | fe2c4 | 1717 | -3221.446512 | 78.7 |
| 1750 | 12v-03-Anticuboh   | fe2c4 | 1752 | -3221.446512 | 78.7 |
| 1751 | 12v-02-Cuboctaedru | fe2c4 | 848  | -3221.44647  | 78.7 |
| 1752 | 12v-03-Anticuboh   | fe2c4 | 1113 | -3221.446386 | 78.8 |
| 1753 | 12v-03-Anticuboh   | fe2c4 | 1035 | -3221.44638  | 78.8 |
| 1754 | 12v-03-Anticuboh   | fe2c4 | 1050 | -3221.446347 | 78.8 |
| 1755 | 12v-03-Anticuboh   | fe2c4 | 1105 | -3221.446347 | 78.8 |
| 1756 | 12v-03-Anticuboh   | fe2c4 | 1653 | -3221.445247 | 79.5 |
| 1757 | 12v-03-Anticuboh   | fe2c4 | 1676 | -3221.445245 | 79.5 |
| 1758 | 12v-02-Cuboctaedru | fe2c4 | 859  | -3221.444901 | 79.7 |
| 1759 | 12v-03-Anticuboh   | fe2c4 | 1554 | -3221.444901 | 79.7 |
| 1760 | 12v-03-Anticuboh   | fe2c4 | 1561 | -3221.444901 | 79.7 |
| 1761 | 12v-02-Cuboctaedru | fe2c4 | 290  | -3221.444663 | 79.8 |
| 1762 | 12v-02-Cuboctaedru | fe2c4 | 359  | -3221.444663 | 79.8 |
| 1763 | 12v-02-Cuboctaedru | fe2c4 | 551  | -3221.443582 | 80.5 |
| 1764 | 12v-02-Cuboctaedru | fe2c4 | 663  | -3221.443582 | 80.5 |
| 1765 | 12v-02-Cuboctaedru | fe2c4 | 668  | -3221.443582 | 80.5 |
| 1766 | 12v-02-Cuboctaedru | fe2c4 | 748  | -3221.443582 | 80.5 |
| 1767 | 12v-02-Cuboctaedru | fe2c4 | 811  | -3221.443582 | 80.5 |
| 1768 | 12v-03-Anticuboh   | fe2c4 | 1093 | -3221.443523 | 80.5 |
| 1769 | 12v-03-Anticuboh   | fe2c4 | 1016 | -3221.443517 | 80.6 |
| 1770 | 12v-02-Cuboctaedru | fe2c4 | 632  | -3221.442925 | 80.9 |
| 1771 | 12v-02-Cuboctaedru | fe2c4 | 730  | -3221.442925 | 80.9 |
| 1772 | 12v-02-Cuboctaedru | fe2c4 | 737  | -3221.442925 | 80.9 |
| 1773 | 12v-02-Cuboctaedru | fe2c4 | 750  | -3221.442925 | 80.9 |
| 1774 | 12v-02-Cuboctaedru | fe2c4 | 757  | -3221.442925 | 80.9 |
| 1775 | 12v-02-Cuboctaedru | fe2c4 | 820  | -3221.442925 | 80.9 |
| 1776 | 12v-03-Anticuboh   | fe2c4 | 1893 | -3221.442505 | 81.2 |
| 1777 | 12v-03-Anticuboh   | fe2c4 | 1883 | -3221.442431 | 81.2 |
| 1778 | 12v-03-Anticuboh   | fe2c4 | 1629 | -3221.442398 | 81.3 |
| 1779 | 12v-03-Anticuboh   | fe2c4 | 1890 | -3221.442334 | 81.3 |
| 1780 | 12v-03-Anticuboh   | fe2c4 | 1897 | -3221.442334 | 81.3 |
| 1781 | 12v-02-Cuboctaedru | fe2c4 | 540  | -3221.441336 | 81.9 |
| 1782 | 12v-02-Cuboctaedru | fe2c4 | 519  | -3221.441185 | 82.0 |



|      |                    |       |      |              |      |
|------|--------------------|-------|------|--------------|------|
| 1783 | 12v-02-Cuboctaedru | fe2c4 | 723  | -3221.440018 | 82.7 |
| 1784 | 12v-02-Cuboctaedru | fe2c4 | 743  | -3221.440018 | 82.7 |
| 1785 | 12v-02-Cuboctaedru | fe2c4 | 806  | -3221.440018 | 82.7 |
| 1786 | 12v-02-Cuboctaedru | fe2c4 | 637  | -3221.438892 | 83.5 |
| 1787 | 12v-02-Cuboctaedru | fe2c4 | 785  | -3221.438892 | 83.5 |
| 1788 | 12v-03-Anticuboh   | fe2c4 | 1447 | -3221.438667 | 83.6 |
| 1789 | 12v-03-Anticuboh   | fe2c4 | 1324 | -3221.438307 | 83.8 |
| 1790 | 12v-03-Anticuboh   | fe2c4 | 1187 | -3221.438277 | 83.8 |
| 1791 | 12v-02-Cuboctaedru | fe2c4 | 947  | -3221.43827  | 83.8 |
| 1792 | 12v-02-Cuboctaedru | fe2c4 | 305  | -3221.43754  | 84.3 |
| 1793 | 12v-02-Cuboctaedru | fe2c4 | 312  | -3221.43754  | 84.3 |
| 1794 | 12v-02-Cuboctaedru | fe2c4 | 364  | -3221.43754  | 84.3 |
| 1795 | 12v-02-Cuboctaedru | fe2c4 | 930  | -3221.436716 | 84.8 |
| 1796 | 12v-02-Cuboctaedru | fe2c4 | 549  | -3221.435882 | 85.3 |
| 1797 | 12v-02-Cuboctaedru | fe2c4 | 661  | -3221.435882 | 85.3 |
| 1798 | 12v-02-Cuboctaedru | fe2c4 | 675  | -3221.435882 | 85.3 |
| 1799 | 12v-02-Cuboctaedru | fe2c4 | 755  | -3221.435882 | 85.3 |
| 1800 | 12v-02-Cuboctaedru | fe2c4 | 762  | -3221.435882 | 85.3 |
| 1801 | 12v-02-Cuboctaedru | fe2c4 | 825  | -3221.435882 | 85.3 |
| 1802 | 12v-02-Cuboctaedru | fe2c4 | 589  | -3221.434932 | 85.9 |
| 1803 | 12v-02-Cuboctaedru | fe2c4 | 631  | -3221.434932 | 85.9 |
| 1804 | 12v-02-Cuboctaedru | fe2c4 | 603  | -3221.43493  | 85.9 |
| 1805 | 12v-03-Anticuboh   | fe2c4 | 1581 | -3221.434891 | 86.0 |
| 1806 | 12v-03-Anticuboh   | fe2c4 | 1480 | -3221.434684 | 86.1 |
| 1807 | 12v-03-Anticuboh   | fe2c4 | 1577 | -3221.434684 | 86.1 |
| 1808 | 12v-02-Cuboctaedru | fe2c4 | 861  | -3221.434387 | 86.3 |
| 1809 | 12v-02-Cuboctaedru | fe2c4 | 903  | -3221.434387 | 86.3 |
| 1810 | 12v-03-Anticuboh   | fe2c4 | 1185 | -3221.434085 | 86.5 |
| 1811 | 12v-02-Cuboctaedru | fe2c4 | 323  | -3221.434054 | 86.5 |
| 1812 | 12v-03-Anticuboh   | fe2c4 | 1785 | -3221.433253 | 87.0 |
| 1813 | 12v-02-Cuboctaedru | fe2c4 | 309  | -3221.433134 | 87.1 |
| 1814 | 12v-02-Cuboctaedru | fe2c4 | 279  | -3221.433084 | 87.1 |
| 1815 | 12v-02-Cuboctaedru | fe2c4 | 286  | -3221.433084 | 87.1 |
| 1816 | 12v-02-Cuboctaedru | fe2c4 | 951  | -3221.432808 | 87.3 |
| 1817 | 12v-02-Cuboctaedru | fe2c4 | 972  | -3221.432808 | 87.3 |
| 1818 | 12v-02-Cuboctaedru | fe2c4 | 562  | -3221.432446 | 87.5 |
| 1819 | 12v-02-Cuboctaedru | fe2c4 | 568  | -3221.432446 | 87.5 |
| 1820 | 12v-02-Cuboctaedru | fe2c4 | 687  | -3221.432446 | 87.5 |
| 1821 | 12v-03-Anticuboh   | fe2c4 | 1418 | -3221.431846 | 87.9 |
| 1822 | 12v-03-Anticuboh   | fe2c4 | 1425 | -3221.431846 | 87.9 |
| 1823 | 12v-02-Cuboctaedru | fe2c4 | 957  | -3221.431801 | 87.9 |
| 1824 | 12v-02-Cuboctaedru | fe2c4 | 969  | -3221.431801 | 87.9 |
| 1825 | 12v-02-Cuboctaedru | fe2c4 | 978  | -3221.431801 | 87.9 |
| 1826 | 12v-03-Anticuboh   | fe2c4 | 1366 | -3221.431724 | 88.0 |
| 1827 | 12v-03-Anticuboh   | fe2c4 | 1189 | -3221.430524 | 88.7 |
| 1828 | 12v-02-Cuboctaedru | fe2c4 | 514  | -3221.429556 | 89.3 |
| 1829 | 12v-02-Cuboctaedru | fe2c4 | 552  | -3221.429556 | 89.3 |
| 1830 | 12v-02-Cuboctaedru | fe2c4 | 573  | -3221.429556 | 89.3 |
| 1831 | 12v-02-Cuboctaedru | fe2c4 | 664  | -3221.429556 | 89.3 |
| 1832 | 12v-02-Cuboctaedru | fe2c4 | 692  | -3221.429556 | 89.3 |
| 1833 | 12v-03-Anticuboh   | fe2c4 | 1052 | -3221.42926  | 89.5 |

|      |                    |       |      |              |       |
|------|--------------------|-------|------|--------------|-------|
| 1834 | 12v-03-Anticuboh   | fe2c4 | 1056 | -3221.429131 | 89.6  |
| 1835 | 12v-02-Cuboctaedru | fe2c4 | 912  | -3221.428348 | 90.1  |
| 1836 | 12v-02-Cuboctaedru | fe2c4 | 863  | -3221.428347 | 90.1  |
| 1837 | 12v-02-Cuboctaedru | fe2c4 | 891  | -3221.428347 | 90.1  |
| 1838 | 12v-03-Anticuboh   | fe2c4 | 1367 | -3221.428302 | 90.1  |
| 1839 | 12v-02-Cuboctaedru | fe2c4 | 868  | -3221.427087 | 90.9  |
| 1840 | 12v-02-Cuboctaedru | fe2c4 | 885  | -3221.427087 | 90.9  |
| 1841 | 12v-02-Cuboctaedru | fe2c4 | 917  | -3221.427087 | 90.9  |
| 1842 | 12v-02-Cuboctaedru | fe2c4 | 680  | -3221.426754 | 91.1  |
| 1843 | 12v-03-Anticuboh   | fe2c4 | 1051 | -3221.42642  | 91.3  |
| 1844 | 12v-02-Cuboctaedru | fe2c4 | 764  | -3221.426012 | 91.5  |
| 1845 | 12v-03-Anticuboh   | fe2c4 | 1678 | -3221.425461 | 91.9  |
| 1846 | 12v-03-Anticuboh   | fe2c4 | 1769 | -3221.425461 | 91.9  |
| 1847 | 12v-03-Anticuboh   | fe2c4 | 1790 | -3221.425461 | 91.9  |
| 1848 | 12v-02-Cuboctaedru | fe2c4 | 671  | -3221.424917 | 92.2  |
| 1849 | 12v-02-Cuboctaedru | fe2c4 | 517  | -3221.424916 | 92.2  |
| 1850 | 12v-02-Cuboctaedru | fe2c4 | 685  | -3221.424916 | 92.2  |
| 1851 | 12v-03-Anticuboh   | fe2c4 | 1456 | -3221.424692 | 92.4  |
| 1852 | 12v-03-Anticuboh   | fe2c4 | 1497 | -3221.424692 | 92.4  |
| 1853 | 12v-02-Cuboctaedru | fe2c4 | 799  | -3221.424576 | 92.4  |
| 1854 | 12v-03-Anticuboh   | fe2c4 | 1560 | -3221.423642 | 93.0  |
| 1855 | 12v-02-Cuboctaedru | fe2c4 | 302  | -3221.42353  | 93.1  |
| 1856 | 12v-02-Cuboctaedru | fe2c4 | 316  | -3221.42353  | 93.1  |
| 1857 | 12v-03-Anticuboh   | fe2c4 | 1069 | -3221.423185 | 93.3  |
| 1858 | 12v-02-Cuboctaedru | fe2c4 | 262  | -3221.42157  | 94.3  |
| 1859 | 12v-02-Cuboctaedru | fe2c4 | 321  | -3221.42157  | 94.3  |
| 1860 | 12v-03-Anticuboh   | fe2c4 | 1192 | -3221.42151  | 94.4  |
| 1861 | 12v-03-Anticuboh   | fe2c4 | 1199 | -3221.42151  | 94.4  |
| 1862 | 12v-02-Cuboctaedru | fe2c4 | 745  | -3221.419843 | 95.4  |
| 1863 | 12v-02-Cuboctaedru | fe2c4 | 753  | -3221.419843 | 95.4  |
| 1864 | 12v-02-Cuboctaedru | fe2c4 | 760  | -3221.419843 | 95.4  |
| 1865 | 12v-02-Cuboctaedru | fe2c4 | 808  | -3221.419843 | 95.4  |
| 1866 | 12v-02-Cuboctaedru | fe2c4 | 815  | -3221.419843 | 95.4  |
| 1867 | 12v-02-Cuboctaedru | fe2c4 | 823  | -3221.419843 | 95.4  |
| 1868 | 12v-03-Anticuboh   | fe2c4 | 1182 | -3221.417505 | 96.9  |
| 1869 | 12v-03-Anticuboh   | fe2c4 | 1154 | -3221.417497 | 96.9  |
| 1870 | 12v-03-Anticuboh   | fe2c4 | 1168 | -3221.417494 | 96.9  |
| 1871 | 12v-03-Anticuboh   | fe2c4 | 1188 | -3221.417298 | 97.0  |
| 1872 | 12v-02-Cuboctaedru | fe2c4 | 994  | -3221.414961 | 98.5  |
| 1873 | 12v-03-Anticuboh   | fe2c4 | 1164 | -3221.413417 | 99.4  |
| 1874 | 12v-03-Anticuboh   | fe2c4 | 1455 | -3221.413349 | 99.5  |
| 1875 | 12v-03-Anticuboh   | fe2c4 | 1490 | -3221.413349 | 99.5  |
| 1876 | 12v-03-Anticuboh   | fe2c4 | 1136 | -3221.413154 | 99.6  |
| 1877 | 12v-02-Cuboctaedru | fe2c4 | 520  | -3221.410785 | 101.1 |
| 1878 | 12v-02-Cuboctaedru | fe2c4 | 547  | -3221.410778 | 101.1 |
| 1879 | 12v-02-Cuboctaedru | fe2c4 | 659  | -3221.410546 | 101.2 |
| 1880 | 12v-02-Cuboctaedru | fe2c4 | 933  | -3221.410306 | 101.4 |
| 1881 | 12v-03-Anticuboh   | fe2c4 | 997  | -3221.409303 | 102.0 |
| 1882 | 12v-03-Anticuboh   | fe2c4 | 1025 | -3221.409296 | 102.0 |
| 1883 | 12v-03-Anticuboh   | fe2c4 | 1486 | -3221.408902 | 102.3 |
| 1884 | 12v-03-Anticuboh   | fe2c4 | 1536 | -3221.408902 | 102.3 |

|      |                                  |              |       |
|------|----------------------------------|--------------|-------|
| 1885 | 12v-03-Anticuboh — fe2c4 — 1045  | -3221.407043 | 103.4 |
| 1886 | 12v-03-Anticuboh — fe2c4 — 1108  | -3221.407041 | 103.4 |
| 1887 | 12v-02-Cuboctaedru — fe2c4 — 609 | -3221.407039 | 103.4 |
| 1888 | 12v-02-Cuboctaedru — fe2c4 — 786 | -3221.407039 | 103.4 |
| 1889 | 12v-03-Anticuboh — fe2c4 — 1075  | -3221.407005 | 103.5 |
| 1890 | 12v-02-Cuboctaedru — fe2c4 — 541 | -3221.406602 | 103.7 |
| 1891 | 12v-02-Cuboctaedru — fe2c4 — 548 | -3221.406602 | 103.7 |
| 1892 | 12v-02-Cuboctaedru — fe2c4 — 660 | -3221.406602 | 103.7 |
| 1893 | 12v-03-Anticuboh — fe2c4 — 1100  | -3221.404744 | 104.9 |
| 1894 | 12v-03-Anticuboh — fe2c4 — 1030  | -3221.404739 | 104.9 |
| 1895 | 12v-02-Cuboctaedru — fe2c4 — 934 | -3221.404443 | 105.1 |
| 1896 | 12v-02-Cuboctaedru — fe2c4 — 955 | -3221.404443 | 105.1 |
| 1897 | 12v-02-Cuboctaedru — fe2c4 — 976 | -3221.404443 | 105.1 |
| 1898 | 12v-03-Anticuboh — fe2c4 — 1190  | -3221.402881 | 106.1 |
| 1899 | 12v-02-Cuboctaedru — fe2c4 — 993 | -3221.402834 | 106.1 |
| 1900 | 12v-03-Anticuboh — fe2c4 — 1055  | -3221.398728 | 108.7 |
| 1901 | 12v-02-Cuboctaedru — fe2c4 — 902 | -3221.398067 | 109.1 |
| 1902 | 12v-02-Cuboctaedru — fe2c4 — 867 | -3221.397047 | 109.7 |
| 1903 | 12v-02-Cuboctaedru — fe2c4 — 906 | -3221.397047 | 109.7 |
| 1904 | 12v-02-Cuboctaedru — fe2c4 — 916 | -3221.397047 | 109.7 |
| 1905 | 12v-02-Cuboctaedru — fe2c4 — 850 | -3221.397046 | 109.7 |
| 1906 | 12v-02-Cuboctaedru — fe2c4 — 836 | -3221.397018 | 109.7 |
| 1907 | 12v-03-Anticuboh — fe2c4 — 1029  | -3221.392242 | 112.7 |
| 1908 | 12v-03-Anticuboh — fe2c4 — 1001  | -3221.391949 | 112.9 |
| 1909 | 12v-02-Cuboctaedru — fe2c4 — 860 | -3221.391357 | 113.3 |
| 1910 | 12v-03-Anticuboh — fe2c4 — 1091  | -3221.385876 | 116.7 |
| 1911 | 12v-03-Anticuboh — fe2c4 — 1014  | -3221.385866 | 116.7 |

Table S4A: Distance table for the lowest-lying Cp<sub>2</sub>Fe<sub>2</sub>C<sub>4</sub>B<sub>7</sub>H<sub>11</sub> optimized structures obtained at the PBE0/def2-TZVP level of theory. Included are the zero-point corrected absolute energies in (a.u.), relative energies in (kcal/mol), symmetry and wiberg bond indecies. The cyclopentadienyl ligands and hydrogens are omitted for clarity.

|                                                                                                                                                        |          |          |          |          |          |          |    |
|--------------------------------------------------------------------------------------------------------------------------------------------------------|----------|----------|----------|----------|----------|----------|----|
| 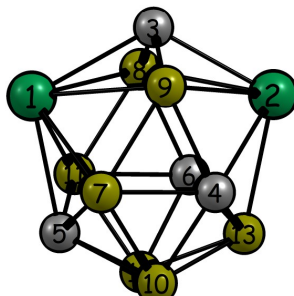 <p>1. -3246.272117 0.0 C<sub>s</sub></p> <p>WBI: Fe1-Fe2: 0.0872</p> |          | 1        | 2        | 3        | 4        | 5        |    |
|                                                                                                                                                        | 1 Fe     | 0.000000 |          |          |          |          |    |
|                                                                                                                                                        | 2 Fe     | 3.553908 | 0.000000 |          |          |          |    |
|                                                                                                                                                        | 3 C      | 2.040470 | 2.026967 | 0.000000 |          |          |    |
|                                                                                                                                                        | 4 C      | 3.147992 | 2.153471 | 2.762226 | 0.000000 |          |    |
|                                                                                                                                                        | 5 C      | 2.037479 | 3.709841 | 3.277369 | 2.601656 | 0.000000 |    |
|                                                                                                                                                        | 6 C      | 3.146249 | 2.152187 | 2.763758 | 2.752523 | 2.601833 |    |
|                                                                                                                                                        | 7 B      | 2.099520 | 3.334951 | 2.847404 | 1.687958 | 1.666624 |    |
|                                                                                                                                                        | 8 B      | 2.241602 | 2.240760 | 1.530737 | 3.215663 | 2.949032 |    |
|                                                                                                                                                        | 9 B      | 2.248061 | 2.239005 | 1.529688 | 1.713893 | 2.950454 |    |
|                                                                                                                                                        | 10 B     | 3.288667 | 3.334820 | 3.747000 | 1.655272 | 1.703724 |    |
|                                                                                                                                                        | 11 B     | 2.098117 | 3.334039 | 2.849600 | 3.288726 | 1.667829 |    |
|                                                                                                                                                        | 12 B     | 3.288182 | 3.334229 | 3.748060 | 2.738842 | 1.704235 |    |
|                                                                                                                                                        | 13 B     | 3.734600 | 2.067141 | 3.303914 | 1.678052 | 2.713509 |    |
|                                                                                                                                                        |          |          | 6        | 7        | 8        | 9        | 10 |
|                                                                                                                                                        | 6 C      | 0.000000 |          |          |          |          |    |
|                                                                                                                                                        | 7 B      | 3.288249 | 0.000000 |          |          |          |    |
|                                                                                                                                                        | 8 B      | 1.717012 | 3.318622 | 0.000000 |          |          |    |
|                                                                                                                                                        | 9 B      | 3.215009 | 1.802070 | 2.686850 | 0.000000 |          |    |
|                                                                                                                                                        | 10 B     | 2.739253 | 1.751722 | 3.656206 | 2.951921 | 0.000000 |    |
| 11 B                                                                                                                                                   | 1.687167 | 2.894174 | 1.800942 | 3.321143 | 2.842096 |          |    |
| 12 B                                                                                                                                                   | 1.655604 | 2.841671 | 2.953553 | 3.655959 | 1.730016 |          |    |
| 13 B                                                                                                                                                   | 1.678011 | 2.824454 | 2.976733 | 2.974254 | 1.766335 |          |    |
|                                                                                                                                                        |          | 11       | 12       | 13       |          |          |    |
| 11 B                                                                                                                                                   | 0.000000 |          |          |          |          |          |    |
| 12 B                                                                                                                                                   | 1.752181 | 0.000000 |          |          |          |          |    |
| 13 B                                                                                                                                                   | 2.824165 | 1.765729 | 0.000000 |          |          |          |    |

|                                                                                                                                                            |          |          |          |          |          |          |
|------------------------------------------------------------------------------------------------------------------------------------------------------------|----------|----------|----------|----------|----------|----------|
| 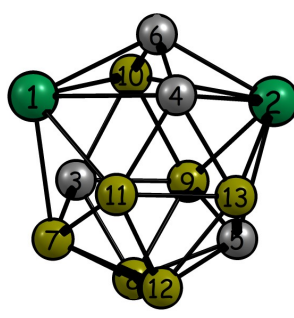 <p>2. -3246.265045 +4.4 <math>C_1</math></p> <p>WBI: Fe1-Fe2: 0.1077</p> | 1        | 2        | 3        | 4        | 5        |          |
|                                                                                                                                                            | 1 Fe     | 0.000000 |          |          |          |          |
|                                                                                                                                                            | 2 Fe     | 3.579223 | 0.000000 |          |          |          |
|                                                                                                                                                            | 3 C      | 2.151650 | 3.167215 | 0.000000 |          |          |
|                                                                                                                                                            | 4 C      | 2.210985 | 2.204673 | 3.118869 | 0.000000 |          |
|                                                                                                                                                            | 5 C      | 3.695537 | 2.048776 | 2.595117 | 2.820023 | 0.000000 |
|                                                                                                                                                            | 6 C      | 2.014536 | 2.024623 | 2.755077 | 1.446878 | 3.215212 |
|                                                                                                                                                            | 7 B      | 2.086644 | 3.800187 | 1.683030 | 2.925581 | 2.731459 |
|                                                                                                                                                            | 8 B      | 3.332405 | 3.303359 | 1.658031 | 3.533206 | 1.696199 |
|                                                                                                                                                            | 9 B      | 3.333642 | 2.109931 | 1.686364 | 3.213507 | 1.664532 |
|                                                                                                                                                            | 10 B     | 2.215285 | 2.240522 | 1.701563 | 2.590779 | 2.919084 |
|                                                                                                                                                            | 11 B     | 2.164529 | 3.315653 | 2.868975 | 1.694920 | 2.746698 |
|                                                                                                                                                            | 12 B     | 3.317196 | 3.321200 | 2.740181 | 2.832873 | 1.714977 |
| 13 B                                                                                                                                                       | 3.316069 | 2.136039 | 3.285256 | 1.693480 | 1.672459 |          |
|                                                                                                                                                            | 6        | 7        | 8        | 9        | 10       |          |
| 6 C                                                                                                                                                        | 0.000000 |          |          |          |          |          |
| 7 B                                                                                                                                                        | 3.299781 | 0.000000 |          |          |          |          |
| 8 B                                                                                                                                                        | 3.709653 | 1.768158 | 0.000000 |          |          |          |
| 9 B                                                                                                                                                        | 2.837860 | 2.840376 | 1.746212 | 0.000000 |          |          |
| 10 B                                                                                                                                                       | 1.537518 | 2.972214 | 2.933453 | 1.797306 | 0.000000 |          |
| 11 B                                                                                                                                                       | 2.773339 | 1.780310 | 2.871166 | 3.444627 | 3.297825 |          |
| 12 B                                                                                                                                                       | 3.677682 | 1.776454 | 1.738959 | 2.851789 | 3.626022 |          |
| 13 B                                                                                                                                                       | 2.765475 | 2.853348 | 2.839486 | 2.902531 | 3.286108 |          |
|                                                                                                                                                            | 11       | 12       | 13       |          |          |          |
| 11 B                                                                                                                                                       | 0.000000 |          |          |          |          |          |
| 12 B                                                                                                                                                       | 1.740279 | 0.000000 |          |          |          |          |
| 13 B                                                                                                                                                       | 1.780213 | 1.746879 | 0.000000 |          |          |          |

|  |      |          |          |          |          |          |
|--|------|----------|----------|----------|----------|----------|
|  | 1    | 2        | 3        | 4        | 5        |          |
|  | 1 Fe | 0.000000 |          |          |          |          |
|  | 2 Fe | 3.589207 | 0.000000 |          |          |          |
|  | 3 C  | 2.154997 | 2.263798 | 0.000000 |          |          |
|  | 4 C  | 2.012789 | 2.032455 | 1.448967 | 0.000000 |          |
|  | 5 C  | 3.185139 | 2.150869 | 3.144277 | 2.755762 | 0.000000 |
|  | 6 C  | 3.159748 | 3.187588 | 2.698239 | 3.504841 | 2.615893 |
|  | 7 B  | 2.251083 | 2.224406 | 2.596750 | 1.537100 | 1.696370 |
|  | 8 B  | 2.119746 | 3.341744 | 1.676174 | 2.767854 | 3.318443 |
|  | 9 B  | 2.154720 | 3.363825 | 3.245059 | 2.857879 | 1.701794 |
|  | 10 B | 2.083182 | 3.862934 | 2.930760 | 3.329375 | 2.737017 |
|  | 11 B | 3.287191 | 3.335803 | 3.532656 | 3.691945 | 1.663417 |
|  | 12 B | 3.773552 | 2.048985 | 2.925727 | 3.263048 | 1.664668 |
|  | 13 B | 3.283271 | 2.139519 | 1.696538 | 2.740787 | 2.857952 |
|  |      | 6        | 7        | 8        | 9        | 10       |
|  | 6 C  | 0.000000 |          |          |          |          |
|  | 7 B  | 3.448694 | 0.000000 |          |          |          |
|  | 8 B  | 1.667275 | 3.297482 | 0.000000 |          |          |
|  | 9 B  | 2.740182 | 1.801065 | 2.959173 | 0.000000 |          |
|  | 10 B | 1.719260 | 3.025071 | 1.770165 | 1.749076 | 0.000000 |
|  | 11 B | 1.673226 | 2.910445 | 2.853555 | 1.732573 | 1.763280 |
|  | 12 B | 1.712658 | 2.933895 | 2.863620 | 2.845551 | 2.873459 |
|  | 13 B | 1.675209 | 3.266045 | 1.793863 | 3.465053 | 2.889988 |
|  |      | 11       | 12       | 13       |          |          |
|  | 11 B | 0.000000 |          |          |          |          |
|  | 12 B | 1.788878 | 0.000000 |          |          |          |
|  | 13 B | 2.874996 | 1.763511 | 0.000000 |          |          |

  

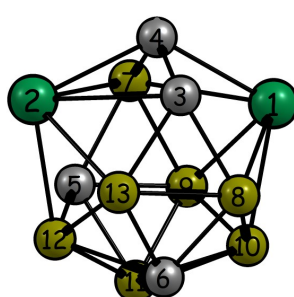

3. -3246.264523 +4.8  $C_1$

WBI: Fe1-Fe2: 0.1046

|                                                                                                                                                            |          |          |          |          |          |          |  |
|------------------------------------------------------------------------------------------------------------------------------------------------------------|----------|----------|----------|----------|----------|----------|--|
| 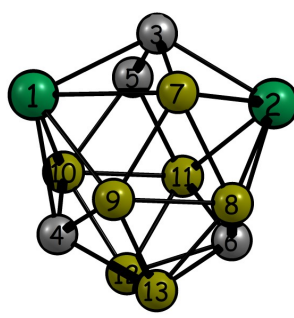 <p>4. -3246.261902 +6.4 <math>C_1</math></p> <p>WBI: Fe1-Fe2: 0.1099</p> |          | 1        | 2        | 3        | 4        | 5        |  |
|                                                                                                                                                            | 1 Fe     | 0.000000 |          |          |          |          |  |
|                                                                                                                                                            | 2 Fe     | 3.579176 | 0.000000 |          |          |          |  |
|                                                                                                                                                            | 3 C      | 2.023905 | 2.024854 | 0.000000 |          |          |  |
|                                                                                                                                                            | 4 C      | 2.058588 | 3.679725 | 3.218751 | 0.000000 |          |  |
|                                                                                                                                                            | 5 C      | 2.197790 | 2.197091 | 1.450128 | 2.821138 | 0.000000 |  |
|                                                                                                                                                            | 6 C      | 3.678011 | 2.057481 | 3.217427 | 2.597963 | 2.818881 |  |
|                                                                                                                                                            | 7 B      | 2.248825 | 2.246497 | 1.535921 | 2.934154 | 2.600458 |  |
|                                                                                                                                                            | 8 B      | 3.311677 | 2.155676 | 2.841667 | 2.723948 | 3.218915 |  |
|                                                                                                                                                            | 9 B      | 2.155856 | 3.311613 | 2.841358 | 1.682572 | 3.219251 |  |
|                                                                                                                                                            | 10 B     | 2.130518 | 3.301969 | 2.771459 | 1.679285 | 1.694997 |  |
|                                                                                                                                                            | 11 B     | 3.301880 | 2.131684 | 2.772020 | 2.728227 | 1.693944 |  |
|                                                                                                                                                            | 12 B     | 3.307028 | 3.306742 | 3.679181 | 1.694396 | 2.825769 |  |
| 13 B                                                                                                                                                       | 3.319506 | 3.318908 | 3.716456 | 1.695632 | 3.534343 |          |  |
|                                                                                                                                                            |          | 6        | 7        | 8        | 9        | 10       |  |
| 6 C                                                                                                                                                        | 0.000000 |          |          |          |          |          |  |
| 7 B                                                                                                                                                        | 2.931530 | 0.000000 |          |          |          |          |  |
| 8 B                                                                                                                                                        | 1.681986 | 1.796297 | 0.000000 |          |          |          |  |
| 9 B                                                                                                                                                        | 2.722968 | 1.797638 | 1.765676 | 0.000000 |          |          |  |
| 10 B                                                                                                                                                       | 2.726277 | 3.306062 | 3.418773 | 2.923933 | 0.000000 |          |  |
| 11 B                                                                                                                                                       | 1.679678 | 3.306224 | 2.925363 | 3.419830 | 1.777257 |          |  |
| 12 B                                                                                                                                                       | 1.693362 | 3.652266 | 2.846769 | 2.847050 | 1.731100 |          |  |
| 13 B                                                                                                                                                       | 1.694767 | 2.962024 | 1.733637 | 1.734206 | 2.848296 |          |  |
|                                                                                                                                                            |          | 11       | 12       | 13       |          |          |  |
| 11 B                                                                                                                                                       | 0.000000 |          |          |          |          |          |  |
| 12 B                                                                                                                                                       | 1.731323 | 0.000000 |          |          |          |          |  |
| 13 B                                                                                                                                                       | 2.849244 | 1.746686 | 0.000000 |          |          |          |  |

|                                                                                                                                                               |          |          |          |          |          |          |
|---------------------------------------------------------------------------------------------------------------------------------------------------------------|----------|----------|----------|----------|----------|----------|
| 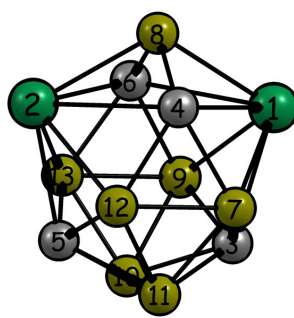 <p>5. -3246.261449 +6.7 <math>C_{2v}</math></p> <p>WBI: Fe1-Fe2: 0.1055</p> | 1        | 2        | 3        | 4        | 5        |          |
|                                                                                                                                                               | 1 Fe     | 0.000000 |          |          |          |          |
|                                                                                                                                                               | 2 Fe     | 3.602472 | 0.000000 |          |          |          |
|                                                                                                                                                               | 3 C      | 2.053447 | 3.688321 | 0.000000 |          |          |
|                                                                                                                                                               | 4 C      | 2.215154 | 2.216021 | 2.826761 | 0.000000 |          |
|                                                                                                                                                               | 5 C      | 3.685322 | 2.053185 | 2.602809 | 2.824997 | 0.000000 |
|                                                                                                                                                               | 6 C      | 2.211035 | 2.211161 | 2.824584 | 2.550732 | 2.822686 |
|                                                                                                                                                               | 7 B      | 2.135814 | 3.308056 | 1.689935 | 1.686464 | 2.730672 |
|                                                                                                                                                               | 8 B      | 2.087798 | 2.086254 | 3.313468 | 1.553288 | 3.310695 |
|                                                                                                                                                               | 9 B      | 2.133192 | 3.305410 | 1.689171 | 3.211423 | 2.729706 |
|                                                                                                                                                               | 10 B     | 3.300863 | 3.301286 | 1.693564 | 3.526965 | 1.692456 |
|                                                                                                                                                               | 11 B     | 3.301842 | 3.302681 | 1.693706 | 2.818958 | 1.692853 |
|                                                                                                                                                               | 12 B     | 3.306228 | 2.137042 | 2.731218 | 1.686265 | 1.688600 |
| 13 B                                                                                                                                                          | 3.303734 | 2.134555 | 2.730634 | 3.211549 | 1.689462 |          |
|                                                                                                                                                               | 6        | 7        | 8        | 9        | 10       |          |
| 6 C                                                                                                                                                           | 0.000000 |          |          |          |          |          |
| 7 B                                                                                                                                                           | 3.208719 | 0.000000 |          |          |          |          |
| 8 B                                                                                                                                                           | 1.553929 | 2.873578 | 0.000000 |          |          |          |
| 9 B                                                                                                                                                           | 1.686216 | 2.924970 | 2.875245 | 0.000000 |          |          |
| 10 B                                                                                                                                                          | 2.817796 | 2.852936 | 3.781797 | 1.729412 | 0.000000 |          |
| 11 B                                                                                                                                                          | 3.524417 | 1.729936 | 3.780976 | 2.852284 | 1.759202 |          |
| 12 B                                                                                                                                                          | 3.208159 | 1.769026 | 2.872663 | 3.417646 | 2.851918 |          |
| 13 B                                                                                                                                                          | 1.685033 | 3.418432 | 2.874192 | 1.767336 | 1.728919 |          |
|                                                                                                                                                               | 11       | 12       | 13       |          |          |          |
| 11 B                                                                                                                                                          | 0.000000 |          |          |          |          |          |
| 12 B                                                                                                                                                          | 1.728907 | 0.000000 |          |          |          |          |
| 13 B                                                                                                                                                          | 2.852607 | 2.925339 | 0.000000 |          |          |          |



|  |      |          |          |          |          |          |
|--|------|----------|----------|----------|----------|----------|
|  |      | 1        | 2        | 3        | 4        | 5        |
|  | 1 Fe | 0.000000 |          |          |          |          |
|  | 2 Fe | 3.544833 | 0.000000 |          |          |          |
|  | 3 C  | 2.102121 | 3.163559 | 0.000000 |          |          |
|  | 4 C  | 2.028449 | 2.030048 | 2.760045 | 0.000000 |          |
|  | 5 C  | 2.153288 | 3.162793 | 2.731986 | 2.770600 | 0.000000 |
|  | 6 C  | 3.189117 | 2.091683 | 1.605800 | 2.771066 | 3.157665 |
|  | 7 B  | 2.062278 | 3.746795 | 1.669565 | 3.313264 | 1.662589 |
|  | 8 B  | 2.240001 | 2.213526 | 1.733266 | 1.526742 | 3.217228 |
|  | 9 B  | 3.350547 | 3.300948 | 2.751208 | 3.762279 | 1.674118 |
|  | 10 B | 3.325912 | 3.311135 | 1.672867 | 3.761143 | 2.747398 |
|  | 11 B | 3.824398 | 2.070915 | 2.722848 | 3.367490 | 2.724103 |
|  | 12 B | 3.345813 | 2.148397 | 3.312136 | 2.875179 | 1.687935 |
|  | 13 B | 2.240568 | 2.247976 | 3.197887 | 1.534062 | 1.713706 |
|  |      | 6        | 7        | 8        | 9        | 10       |
|  | 6 C  | 0.000000 |          |          |          |          |
|  | 7 B  | 2.698656 | 0.000000 |          |          |          |
|  | 8 B  | 1.730758 | 2.994668 | 0.000000 |          |          |
|  | 9 B  | 2.737200 | 1.782345 | 3.662077 | 0.000000 |          |
|  | 10 B | 1.675688 | 1.776680 | 2.958041 | 1.741676 | 0.000000 |
|  | 11 B | 1.671313 | 2.838676 | 3.015848 | 1.780794 | 1.789887 |
|  | 12 B | 2.840281 | 2.825632 | 3.338890 | 1.743576 | 2.871820 |
|  | 13 B | 3.211701 | 2.965211 | 2.679154 | 2.955980 | 3.661436 |
|  |      | 11       | 12       | 13       |          |          |
|  | 11 B | 0.000000 |          |          |          |          |
|  | 12 B | 1.756036 | 0.000000 |          |          |          |
|  | 13 B | 3.040606 | 1.807031 | 0.000000 |          |          |

  

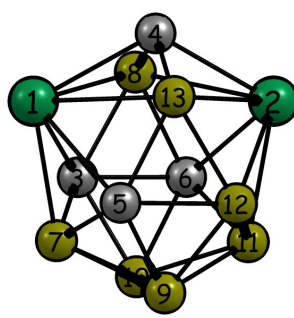

6. -3246.255282 +10.6  $C_1$

WBI: Fe1-Fe2: 0.0844

|                                                                                                                                                             |          |          |          |          |          |          |
|-------------------------------------------------------------------------------------------------------------------------------------------------------------|----------|----------|----------|----------|----------|----------|
| 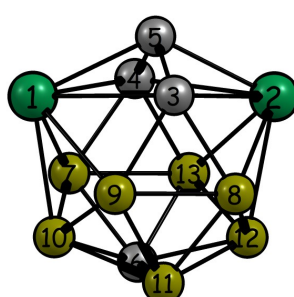 <p>7. -3246.252626 +12.2 <math>C_1</math></p> <p>WBI: Fe1-Fe2: 0.1247</p> | 1        | 2        | 3        | 4        | 5        |          |
|                                                                                                                                                             | 1 Fe     | 0.000000 |          |          |          |          |
|                                                                                                                                                             | 2 Fe     | 3.605929 | 0.000000 |          |          |          |
|                                                                                                                                                             | 3 C      | 2.217812 | 2.206714 | 0.000000 |          |          |
|                                                                                                                                                             | 4 C      | 2.180417 | 2.185470 | 2.496525 | 0.000000 |          |
|                                                                                                                                                             | 5 C      | 2.007067 | 2.007356 | 1.447431 | 1.454407 | 0.000000 |
|                                                                                                                                                             | 6 C      | 3.178172 | 3.179201 | 3.344389 | 2.679689 | 3.476578 |
|                                                                                                                                                             | 7 B      | 2.127390 | 3.316145 | 3.196770 | 1.684099 | 2.758445 |
|                                                                                                                                                             | 8 B      | 3.348254 | 2.173129 | 1.688984 | 3.208882 | 2.765177 |
|                                                                                                                                                             | 9 B      | 2.175783 | 3.344508 | 1.692131 | 3.206987 | 2.763156 |
|                                                                                                                                                             | 10 B     | 2.083645 | 3.839859 | 2.906181 | 2.910322 | 3.268962 |
|                                                                                                                                                             | 11 B     | 3.317361 | 3.316361 | 2.800458 | 3.495809 | 3.622036 |
|                                                                                                                                                             | 12 B     | 3.840985 | 2.084950 | 2.902451 | 2.912959 | 3.270614 |
| 13 B                                                                                                                                                        | 3.314118 | 2.127916 | 3.192144 | 1.685395 | 2.757215 |          |
|                                                                                                                                                             | 6        | 7        | 8        | 9        | 10       |          |
| 6 C                                                                                                                                                         | 0.000000 |          |          |          |          |          |
| 7 B                                                                                                                                                         | 1.666664 | 0.000000 |          |          |          |          |
| 8 B                                                                                                                                                         | 2.749855 | 3.464914 | 0.000000 |          |          |          |
| 9 B                                                                                                                                                         | 2.750645 | 2.965057 | 1.794273 | 0.000000 |          |          |
| 10 B                                                                                                                                                        | 1.714415 | 1.766569 | 2.876758 | 1.760957 | 0.000000 |          |
| 11 B                                                                                                                                                        | 1.684100 | 2.864740 | 1.742370 | 1.743224 | 1.781103 |          |
| 12 B                                                                                                                                                        | 1.714045 | 2.879326 | 1.760478 | 2.877310 | 2.885402 |          |
| 13 B                                                                                                                                                        | 1.667333 | 1.792379 | 2.962828 | 3.463569 | 2.879278 |          |
|                                                                                                                                                             | 11       | 12       | 13       |          |          |          |
| 11 B                                                                                                                                                        | 0.000000 |          |          |          |          |          |
| 12 B                                                                                                                                                        | 1.781440 | 0.000000 |          |          |          |          |
| 13 B                                                                                                                                                        | 2.864203 | 1.765373 | 0.000000 |          |          |          |

|  |      |          |          |          |          |          |
|--|------|----------|----------|----------|----------|----------|
|  | 1    | 2        | 3        | 4        | 5        |          |
|  | 1 Fe | 0.000000 |          |          |          |          |
|  | 2 Fe | 3.605105 | 0.000000 |          |          |          |
|  | 3 C  | 2.213691 | 2.176458 | 0.000000 |          |          |
|  | 4 C  | 2.058232 | 3.674627 | 2.791907 | 0.000000 |          |
|  | 5 C  | 2.215438 | 2.174065 | 2.489291 | 2.794391 | 0.000000 |
|  | 6 C  | 2.027333 | 1.986803 | 1.449896 | 3.158257 | 1.450586 |
|  | 7 B  | 3.348166 | 2.165225 | 1.695785 | 2.739202 | 3.207305 |
|  | 8 B  | 3.340002 | 3.316636 | 2.818719 | 1.707977 | 3.509418 |
|  | 9 B  | 2.146144 | 3.306367 | 1.690782 | 1.670328 | 3.179213 |
|  | 10 B | 3.871689 | 2.114440 | 2.924687 | 2.745737 | 2.925855 |
|  | 11 B | 3.347665 | 2.162835 | 3.205991 | 2.739550 | 1.695405 |
|  | 12 B | 2.144628 | 3.305074 | 3.176680 | 1.670628 | 1.692186 |
|  | 13 B | 3.340079 | 3.314700 | 3.507399 | 1.709124 | 2.819398 |
|  | 6 C  | 0.000000 |          |          |          |          |
|  | 7 B  | 2.777161 | 0.000000 |          |          |          |
|  | 8 B  | 3.646280 | 1.738626 | 0.000000 |          |          |
|  | 9 B  | 2.755357 | 1.782310 | 1.744378 | 0.000000 |          |
|  | 10 B | 3.298152 | 1.775594 | 1.776754 | 2.867322 | 0.000000 |
|  | 11 B | 2.776998 | 2.975768 | 2.870034 | 3.439528 | 1.776856 |
|  | 12 B | 2.754914 | 3.439602 | 2.852959 | 2.907748 | 2.868583 |
|  | 13 B | 3.645807 | 2.869441 | 1.752242 | 2.853007 | 1.776327 |
|  | 11   | 12       | 13       |          |          |          |
|  | 11 B | 0.000000 |          |          |          |          |
|  | 12 B | 1.782982 | 0.000000 |          |          |          |
|  | 13 B | 1.737654 | 1.745285 | 0.000000 |          |          |

  

|    |                      |       |       |
|----|----------------------|-------|-------|
| 8. | -3246.249938         | +13.9 | $C_s$ |
|    | WBI: Fe1-Fe2: 0.1250 |       |       |

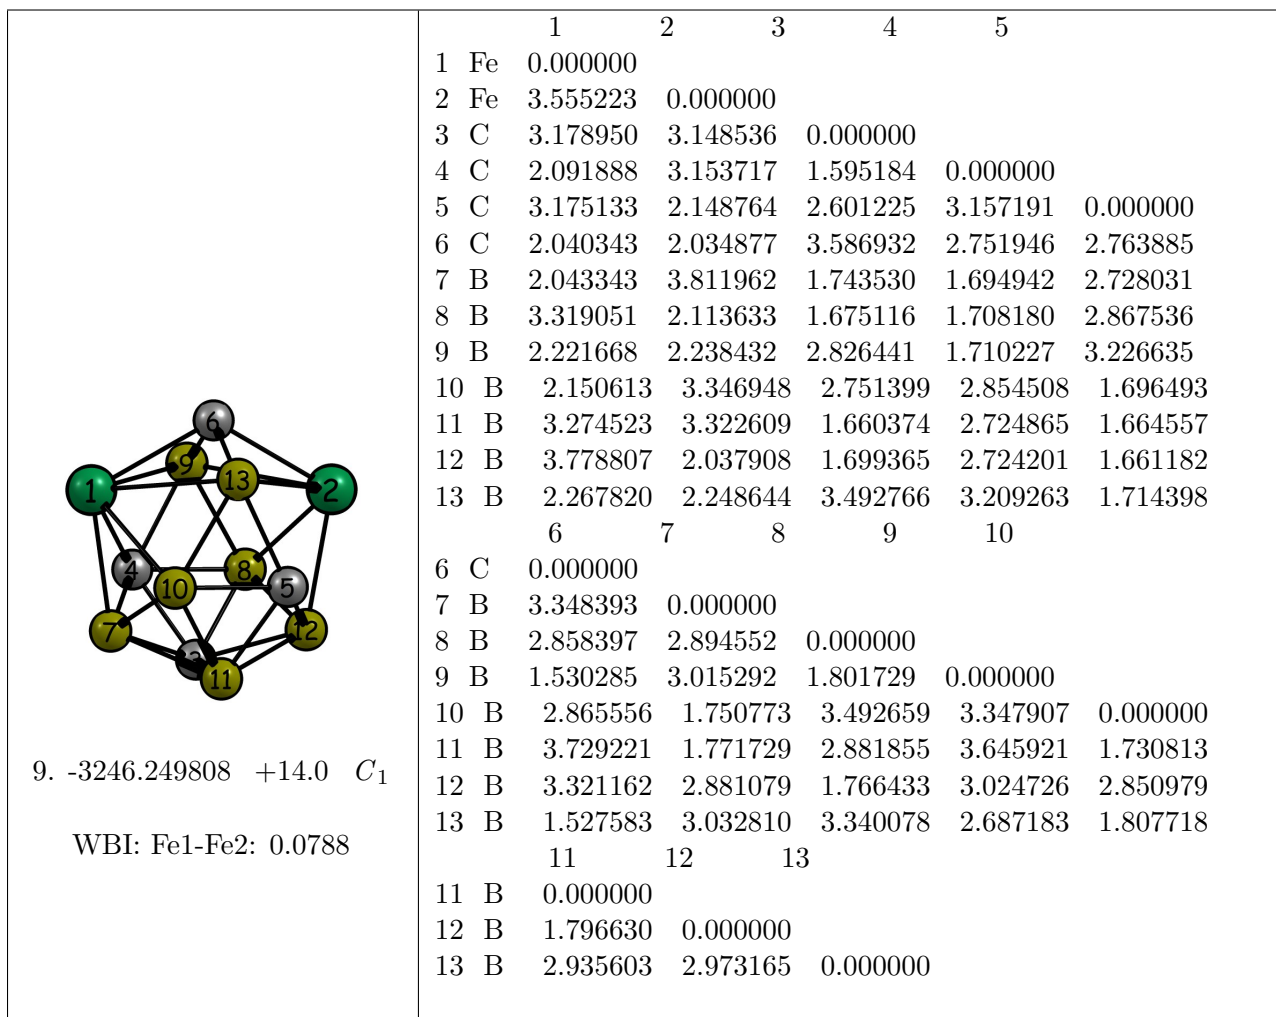

|                                                                                                                                                              |          |          |          |          |          |          |
|--------------------------------------------------------------------------------------------------------------------------------------------------------------|----------|----------|----------|----------|----------|----------|
| 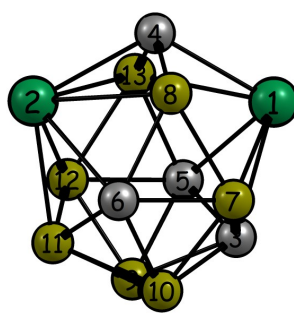 <p>10. -3246.249710 +14.1 <math>C_1</math></p> <p>WBI: Fe1-Fe2: 0.0887</p> | 1        | 2        | 3        | 4        | 5        |          |
|                                                                                                                                                              | 1 Fe     | 0.000000 |          |          |          |          |
|                                                                                                                                                              | 2 Fe     | 3.557732 | 0.000000 |          |          |          |
|                                                                                                                                                              | 3 C      | 2.028330 | 3.633162 | 0.000000 |          |          |
|                                                                                                                                                              | 4 C      | 2.040710 | 2.031237 | 3.221778 | 0.000000 |          |
|                                                                                                                                                              | 5 C      | 2.122658 | 3.150163 | 1.584331 | 2.754842 | 0.000000 |
|                                                                                                                                                              | 6 C      | 3.177101 | 2.135177 | 2.577297 | 2.769203 | 3.136129 |
|                                                                                                                                                              | 7 B      | 2.116212 | 3.302118 | 1.663930 | 2.832801 | 2.802455 |
|                                                                                                                                                              | 8 B      | 2.278539 | 2.215935 | 2.926613 | 1.528017 | 3.211732 |
|                                                                                                                                                              | 9 B      | 3.357012 | 3.294874 | 1.733995 | 3.765299 | 1.683756 |
|                                                                                                                                                              | 10 B     | 3.305113 | 3.312067 | 1.693625 | 3.742834 | 2.714103 |
|                                                                                                                                                              | 11 B     | 3.818878 | 2.077981 | 2.721513 | 3.363413 | 2.715253 |
|                                                                                                                                                              | 12 B     | 3.339148 | 2.138492 | 2.722109 | 2.871024 | 1.690076 |
|                                                                                                                                                              | 13 B     | 2.238110 | 2.240902 | 2.876953 | 1.531351 | 1.711019 |
|                                                                                                                                                              | 6        | 7        | 8        | 9        | 10       |          |
| 6 C                                                                                                                                                          | 0.000000 |          |          |          |          |          |
| 7 B                                                                                                                                                          | 1.682299 | 0.000000 |          |          |          |          |
| 8 B                                                                                                                                                          | 1.715550 | 1.804058 | 0.000000 |          |          |          |
| 9 B                                                                                                                                                          | 2.739972 | 2.872905 | 3.678683 | 0.000000 |          |          |
| 10 B                                                                                                                                                         | 1.657739 | 1.745217 | 2.954882 | 1.737814 | 0.000000 |          |
| 11 B                                                                                                                                                         | 1.684624 | 2.846464 | 3.007303 | 1.767255 | 1.775568 |          |
| 12 B                                                                                                                                                         | 2.856927 | 3.444415 | 3.340770 | 1.735259 | 2.860081 |          |
| 13 B                                                                                                                                                         | 3.217681 | 3.299005 | 2.684995 | 2.960530 | 3.644489 |          |
|                                                                                                                                                              | 11       | 12       | 13       |          |          |          |
| 11 B                                                                                                                                                         | 0.000000 |          |          |          |          |          |
| 12 B                                                                                                                                                         | 1.764715 | 0.000000 |          |          |          |          |
| 13 B                                                                                                                                                         | 3.044156 | 1.806518 | 0.000000 |          |          |          |

|                                                                                                                                                              |          |          |          |          |          |          |
|--------------------------------------------------------------------------------------------------------------------------------------------------------------|----------|----------|----------|----------|----------|----------|
| 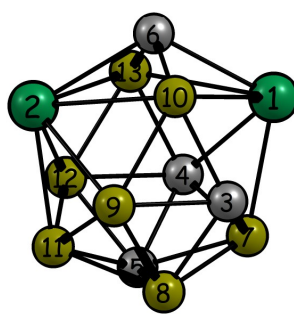 <p>11. -3246.248024 +15.1 <math>C_1</math></p> <p>WBI: Fe1-Fe2: 0.0791</p> | 1        | 2        | 3        | 4        | 5        |          |
|                                                                                                                                                              | 1 Fe     | 0.000000 |          |          |          |          |
|                                                                                                                                                              | 2 Fe     | 3.554239 | 0.000000 |          |          |          |
|                                                                                                                                                              | 3 C      | 2.158574 | 3.164653 | 0.000000 |          |          |
|                                                                                                                                                              | 4 C      | 2.111902 | 3.132919 | 2.743322 | 0.000000 |          |
|                                                                                                                                                              | 5 C      | 3.203864 | 3.137412 | 2.620196 | 1.591723 | 0.000000 |
|                                                                                                                                                              | 6 C      | 2.033623 | 2.035693 | 2.764200 | 2.744570 | 3.589680 |
|                                                                                                                                                              | 7 B      | 2.032810 | 3.727219 | 1.653791 | 1.679105 | 1.724286 |
|                                                                                                                                                              | 8 B      | 3.340326 | 3.269389 | 1.660702 | 2.749030 | 1.668405 |
|                                                                                                                                                              | 9 B      | 3.361921 | 2.141911 | 1.701368 | 3.317054 | 2.735970 |
|                                                                                                                                                              | 10 B     | 2.261184 | 2.248876 | 1.720186 | 3.199228 | 3.494339 |
|                                                                                                                                                              | 11 B     | 3.862075 | 2.069803 | 2.740330 | 2.750801 | 1.708598 |
|                                                                                                                                                              | 12 B     | 3.347484 | 2.100864 | 3.331497 | 1.712781 | 1.680424 |
| 13 B                                                                                                                                                         | 2.255054 | 2.208658 | 3.229395 | 1.718817 | 2.827826 |          |
|                                                                                                                                                              | 6        | 7        | 8        | 9        | 10       |          |
| 6 C                                                                                                                                                          | 0.000000 |          |          |          |          |          |
| 7 B                                                                                                                                                          | 3.282789 | 0.000000 |          |          |          |          |
| 8 B                                                                                                                                                          | 3.732658 | 1.794453 | 0.000000 |          |          |          |
| 9 B                                                                                                                                                          | 2.868468 | 2.834973 | 1.733320 | 0.000000 |          |          |
| 10 B                                                                                                                                                         | 1.528743 | 2.952903 | 2.933772 | 1.801502 | 0.000000 |          |
| 11 B                                                                                                                                                         | 3.389267 | 2.869201 | 1.769227 | 1.752672 | 3.050680 |          |
| 12 B                                                                                                                                                         | 2.866012 | 2.862321 | 2.865688 | 2.966053 | 3.346372 |          |
| 13 B                                                                                                                                                         | 1.531716 | 2.984414 | 3.652220 | 3.348757 | 2.688580 |          |
|                                                                                                                                                              | 11       | 12       | 13       |          |          |          |
| 11 B                                                                                                                                                         | 0.000000 |          |          |          |          |          |
| 12 B                                                                                                                                                         | 1.770700 | 0.000000 |          |          |          |          |
| 13 B                                                                                                                                                         | 3.056817 | 1.793928 | 0.000000 |          |          |          |



|                                                                                                                                                              |          |          |          |          |          |          |    |
|--------------------------------------------------------------------------------------------------------------------------------------------------------------|----------|----------|----------|----------|----------|----------|----|
| 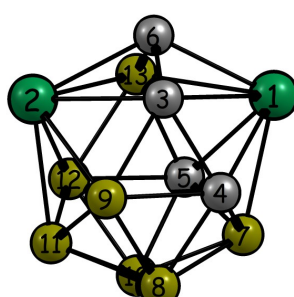 <p>13. -3246.247037 +15.7 <math>C_1</math></p> <p>WBI: Fe1-Fe2: 0.1030</p> |          | 1        | 2        | 3        | 4        | 5        |    |
|                                                                                                                                                              | 1 Fe     | 0.000000 |          |          |          |          |    |
|                                                                                                                                                              | 2 Fe     | 3.585034 | 0.000000 |          |          |          |    |
|                                                                                                                                                              | 3 C      | 2.311424 | 2.108139 | 0.000000 |          |          |    |
|                                                                                                                                                              | 4 C      | 2.171677 | 3.131979 | 1.616143 | 0.000000 |          |    |
|                                                                                                                                                              | 5 C      | 2.145437 | 3.164711 | 3.119397 | 2.744180 | 0.000000 |    |
|                                                                                                                                                              | 6 C      | 2.025127 | 1.997437 | 1.447637 | 2.641868 | 2.746277 |    |
|                                                                                                                                                              | 7 B      | 2.072547 | 3.724568 | 2.869672 | 1.669804 | 1.669430 |    |
|                                                                                                                                                              | 8 B      | 3.379872 | 3.283034 | 2.797583 | 1.679051 | 2.759938 |    |
|                                                                                                                                                              | 9 B      | 3.435752 | 2.127936 | 1.689577 | 1.728171 | 3.343034 |    |
|                                                                                                                                                              | 10 B     | 3.363073 | 3.308587 | 3.517240 | 2.758950 | 1.671832 |    |
|                                                                                                                                                              | 11 B     | 3.914012 | 2.119027 | 2.914993 | 2.756904 | 2.748646 |    |
|                                                                                                                                                              | 12 B     | 3.368060 | 2.149680 | 3.207454 | 3.303231 | 1.696682 |    |
|                                                                                                                                                              | 13 B     | 2.206123 | 2.240797 | 2.589762 | 3.146854 | 1.684859 |    |
|                                                                                                                                                              |          |          | 6        | 7        | 8        | 9        | 10 |
|                                                                                                                                                              | 6 C      | 0.000000 |          |          |          |          |    |
|                                                                                                                                                              | 7 B      | 3.226558 | 0.000000 |          |          |          |    |
|                                                                                                                                                              | 8 B      | 3.660825 | 1.782932 | 0.000000 |          |          |    |
|                                                                                                                                                              | 9 B      | 2.809445 | 2.849157 | 1.736404 | 0.000000 |          |    |
|                                                                                                                                                              | 10 B     | 3.709019 | 1.775366 | 1.751893 | 2.875025 | 0.000000 |    |
|                                                                                                                                                              | 11 B     | 3.360853 | 2.847614 | 1.778651 | 1.764483 | 1.780571 |    |
| 12 B                                                                                                                                                         | 2.863945 | 2.818974 | 2.853313 | 2.956046 | 1.742250 |          |    |
| 13 B                                                                                                                                                         | 1.546279 | 2.916303 | 3.617532 | 3.337557 | 2.928202 |          |    |
|                                                                                                                                                              |          | 11       | 12       | 13       |          |          |    |
| 11 B                                                                                                                                                         | 0.000000 |          |          |          |          |          |    |
| 12 B                                                                                                                                                         | 1.751176 | 0.000000 |          |          |          |          |    |
| 13 B                                                                                                                                                         | 3.056710 | 1.811345 | 0.000000 |          |          |          |    |



|  |  |      |          |          |          |          |          |
|--|--|------|----------|----------|----------|----------|----------|
|  |  | 1    | 2        | 3        | 4        | 5        |          |
|  |  | 1 Fe | 0.000000 |          |          |          |          |
|  |  | 2 Fe | 3.557486 | 0.000000 |          |          |          |
|  |  | 3 C  | 3.184232 | 2.095383 | 0.000000 |          |          |
|  |  | 4 C  | 2.098286 | 3.182761 | 1.612919 | 0.000000 |          |
|  |  | 5 C  | 3.181249 | 3.181409 | 2.612622 | 2.613182 | 0.000000 |
|  |  | 6 C  | 2.040452 | 2.039826 | 2.766238 | 2.766799 | 3.601539 |
|  |  | 7 B  | 3.289887 | 3.288155 | 1.660487 | 1.660988 | 1.652116 |
|  |  | 8 B  | 2.036563 | 3.786734 | 2.722186 | 1.670287 | 1.713133 |
|  |  | 9 B  | 2.234545 | 2.234411 | 1.732508 | 1.731442 | 3.495140 |
|  |  | 10 B | 3.788214 | 2.036109 | 1.670325 | 2.723436 | 1.713751 |
|  |  | 11 B | 2.159009 | 3.307208 | 3.320366 | 2.861157 | 1.686315 |
|  |  | 12 B | 3.307474 | 2.158304 | 2.858169 | 3.320223 | 1.686249 |
|  |  | 13 B | 2.266565 | 2.263534 | 3.244162 | 3.246237 | 2.866352 |
|  |  |      | 6        | 7        | 8        | 9        | 10       |
|  |  | 6 C  | 0.000000 |          |          |          |          |
|  |  | 7 B  | 3.731071 | 0.000000 |          |          |          |
|  |  | 8 B  | 3.330009 | 1.783760 | 0.000000 |          |          |
|  |  | 9 B  | 1.522588 | 2.932841 | 2.995666 | 0.000000 |          |
|  |  | 10 B | 3.330352 | 1.783971 | 2.866715 | 2.997508 | 0.000000 |
|  |  | 11 B | 2.853536 | 2.863958 | 1.760937 | 3.334169 | 2.855824 |
|  |  | 12 B | 2.853303 | 2.862343 | 2.855770 | 3.333712 | 1.758172 |
|  |  | 13 B | 1.537297 | 3.674411 | 3.035683 | 2.698233 | 3.033437 |
|  |  |      | 11       | 12       | 13       |          |          |
|  |  | 11 B | 0.000000 |          |          |          |          |
|  |  | 12 B | 1.764928 | 0.000000 |          |          |          |
|  |  | 13 B | 1.795348 | 1.793968 | 0.000000 |          |          |

  

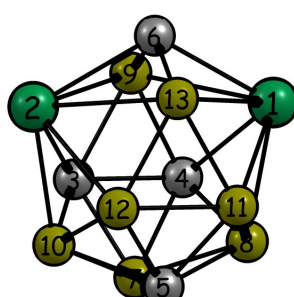

14. -3246.246615 +16.0  $C_1$

WBI: Fe1-Fe2: 0.0783

|                                                                                                                                                              |          |          |          |          |          |          |  |
|--------------------------------------------------------------------------------------------------------------------------------------------------------------|----------|----------|----------|----------|----------|----------|--|
| 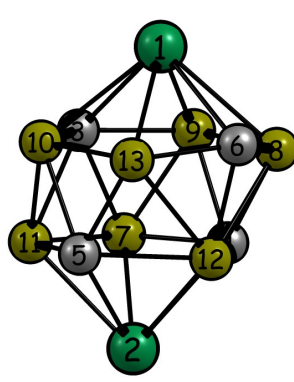 <p>15. -3246.246167 +16.3 <math>C_1</math></p> <p>WBI: Fe1-Fe2: 0.0819</p> | 1        | 2        | 3        | 4        | 5        |          |  |
|                                                                                                                                                              | 1 Fe     | 0.000000 |          |          |          |          |  |
|                                                                                                                                                              | 2 Fe     | 4.255948 | 0.000000 |          |          |          |  |
|                                                                                                                                                              | 3 C      | 2.094284 | 3.166898 | 0.000000 |          |          |  |
|                                                                                                                                                              | 4 C      | 3.134203 | 2.028943 | 2.589068 | 0.000000 |          |  |
|                                                                                                                                                              | 5 C      | 3.134339 | 2.028970 | 2.587762 | 2.785152 | 0.000000 |  |
|                                                                                                                                                              | 6 C      | 2.017464 | 3.643917 | 3.248710 | 2.691575 | 2.691170 |  |
|                                                                                                                                                              | 7 B      | 3.356137 | 2.054299 | 1.740089 | 1.644728 | 2.758183 |  |
|                                                                                                                                                              | 8 B      | 2.174758 | 3.416414 | 2.914488 | 1.710015 | 3.240481 |  |
|                                                                                                                                                              | 9 B      | 2.119328 | 3.276242 | 1.644264 | 1.683958 | 3.290583 |  |
|                                                                                                                                                              | 10 B     | 2.121659 | 3.275912 | 1.642738 | 3.291463 | 1.683472 |  |
|                                                                                                                                                              | 11 B     | 3.357641 | 2.053559 | 1.741362 | 2.759416 | 1.643077 |  |
|                                                                                                                                                              | 12 B     | 3.052499 | 2.088219 | 3.156823 | 1.824982 | 1.821843 |  |
| 13 B                                                                                                                                                         | 2.173203 | 3.417779 | 2.912018 | 3.241455 | 1.710734 |          |  |
|                                                                                                                                                              | 6        | 7        | 8        | 9        | 10       |          |  |
| 6 C                                                                                                                                                          | 0.000000 |          |          |          |          |          |  |
| 7 B                                                                                                                                                          | 3.704105 | 0.000000 |          |          |          |          |  |
| 8 B                                                                                                                                                          | 1.530809 | 2.948241 | 0.000000 |          |          |          |  |
| 9 B                                                                                                                                                          | 2.838275 | 1.770721 | 1.778099 | 0.000000 |          |          |  |
| 10 B                                                                                                                                                         | 2.839622 | 2.861333 | 3.313504 | 2.870916 | 0.000000 |          |  |
| 11 B                                                                                                                                                         | 3.704242 | 1.762403 | 3.672816 | 2.863539 | 1.769806 |          |  |
| 12 B                                                                                                                                                         | 1.694790 | 2.878248 | 1.979311 | 2.866700 | 2.865478 |          |  |
| 13 B                                                                                                                                                         | 1.531235 | 3.671580 | 2.721035 | 3.311343 | 1.777346 |          |  |
|                                                                                                                                                              | 11       | 12       | 13       |          |          |          |  |
| 11 B                                                                                                                                                         | 0.000000 |          |          |          |          |          |  |
| 12 B                                                                                                                                                         | 2.876675 | 0.000000 |          |          |          |          |  |
| 13 B                                                                                                                                                         | 2.947348 | 1.978689 | 0.000000 |          |          |          |  |

|                                                                                                                                                              |          |          |          |          |          |          |
|--------------------------------------------------------------------------------------------------------------------------------------------------------------|----------|----------|----------|----------|----------|----------|
| 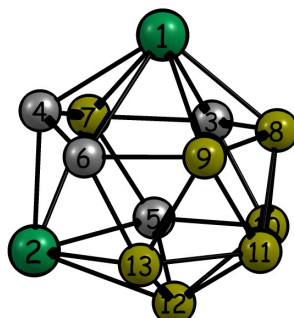 <p>16. -3246.245764 +16.5 <math>C_1</math></p> <p>WBI: Fe1-Fe2: 0.1057</p> | 1        | 2        | 3        | 4        | 5        |          |
|                                                                                                                                                              | 1 Fe     | 0.000000 |          |          |          |          |
|                                                                                                                                                              | 2 Fe     | 3.569839 | 0.000000 |          |          |          |
|                                                                                                                                                              | 3 C      | 2.101429 | 3.185506 | 0.000000 |          |          |
|                                                                                                                                                              | 4 C      | 2.016836 | 2.015217 | 2.759375 | 0.000000 |          |
|                                                                                                                                                              | 5 C      | 3.188034 | 2.099749 | 1.608765 | 2.759491 | 0.000000 |
|                                                                                                                                                              | 6 C      | 2.218902 | 2.214714 | 3.116847 | 1.447562 | 3.116311 |
|                                                                                                                                                              | 7 B      | 2.208887 | 2.207552 | 1.716905 | 1.538644 | 1.717190 |
|                                                                                                                                                              | 8 B      | 2.080650 | 3.810128 | 1.671309 | 3.307755 | 2.718685 |
|                                                                                                                                                              | 9 B      | 2.169739 | 3.326388 | 2.849188 | 2.774694 | 3.315023 |
|                                                                                                                                                              | 10 B     | 3.325455 | 3.323487 | 1.675794 | 3.725950 | 1.676106 |
|                                                                                                                                                              | 11 B     | 3.324354 | 3.322617 | 2.743011 | 3.679180 | 2.743486 |
|                                                                                                                                                              | 12 B     | 3.811735 | 2.079199 | 2.717546 | 3.307147 | 1.671010 |
| 13 B                                                                                                                                                         | 3.328350 | 2.170111 | 3.315288 | 2.775359 | 2.850926 |          |
|                                                                                                                                                              | 6        | 7        | 8        | 9        | 10       |          |
| 6 C                                                                                                                                                          | 0.000000 |          |          |          |          |          |
| 7 B                                                                                                                                                          | 2.587003 | 0.000000 |          |          |          |          |
| 8 B                                                                                                                                                          | 2.926213 | 2.982370 | 0.000000 |          |          |          |
| 9 B                                                                                                                                                          | 1.696589 | 3.292044 | 1.768374 | 0.000000 |          |          |
| 10 B                                                                                                                                                         | 3.552081 | 2.933641 | 1.780169 | 2.881028 | 0.000000 |          |
| 11 B                                                                                                                                                         | 2.836168 | 3.614170 | 1.787482 | 1.751730 | 1.746544 |          |
| 12 B                                                                                                                                                         | 2.924163 | 2.982008 | 2.856464 | 2.867000 | 1.779627 |          |
| 13 B                                                                                                                                                         | 1.694827 | 3.293304 | 2.867306 | 1.782381 | 2.881678 |          |
|                                                                                                                                                              | 11       | 12       | 13       |          |          |          |
| 11 B                                                                                                                                                         | 0.000000 |          |          |          |          |          |
| 12 B                                                                                                                                                         | 1.787306 | 0.000000 |          |          |          |          |
| 13 B                                                                                                                                                         | 1.751486 | 1.769571 | 0.000000 |          |          |          |

|  |      |          |          |          |          |          |
|--|------|----------|----------|----------|----------|----------|
|  | 1    | 2        | 3        | 4        | 5        |          |
|  | 1 Fe | 0.000000 |          |          |          |          |
|  | 2 Fe | 3.587182 | 0.000000 |          |          |          |
|  | 3 C  | 3.153280 | 2.162683 | 0.000000 |          |          |
|  | 4 C  | 2.131705 | 2.289237 | 1.620245 | 0.000000 |          |
|  | 5 C  | 3.182961 | 3.195862 | 2.618216 | 3.351446 | 0.000000 |
|  | 6 C  | 2.013346 | 2.023828 | 2.656822 | 1.446662 | 3.548667 |
|  | 7 B  | 2.086913 | 3.869037 | 2.746792 | 2.895432 | 1.713436 |
|  | 8 B  | 3.260730 | 3.345053 | 1.667275 | 2.778230 | 1.664358 |
|  | 9 B  | 2.127723 | 3.412514 | 1.728722 | 1.685499 | 2.755578 |
|  | 10 B | 2.153830 | 3.319476 | 3.306048 | 3.198916 | 1.680343 |
|  | 11 B | 3.762895 | 2.041352 | 1.667122 | 2.869909 | 1.712066 |
|  | 12 B | 3.308526 | 2.151739 | 2.871941 | 3.241329 | 1.679878 |
|  | 13 B | 2.247470 | 2.232956 | 3.198180 | 2.607136 | 2.836675 |
|  |      | 6        | 7        | 8        | 9        | 10       |
|  | 6 C  | 0.000000 |          |          |          |          |
|  | 7 B  | 3.330841 | 0.000000 |          |          |          |
|  | 8 B  | 3.640044 | 1.760932 | 0.000000 |          |          |
|  | 9 B  | 2.801750 | 1.761752 | 1.727490 | 0.000000 |          |
|  | 10 B | 2.838814 | 1.763520 | 2.844462 | 2.972129 | 0.000000 |
|  | 11 B | 3.240705 | 2.873871 | 1.800951 | 2.871246 | 2.845644 |
|  | 12 B | 2.836232 | 2.879201 | 2.878062 | 3.501247 | 1.769721 |
|  | 13 B | 1.547146 | 3.051439 | 3.634707 | 3.359702 | 1.789108 |
|  |      | 11       | 12       | 13       |          |          |
|  | 11 B | 0.000000 |          |          |          |          |
|  | 12 B | 1.763615 | 0.000000 |          |          |          |
|  | 13 B | 2.987066 | 1.778046 | 0.000000 |          |          |

  

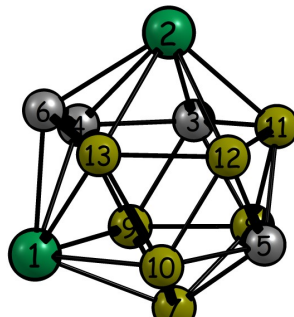

17. -3246.244903 +17.1  $C_1$

WBI: Fe1-Fe2: 0.0986

|  |      |          |          |          |          |          |
|--|------|----------|----------|----------|----------|----------|
|  | 1    | 2        | 3        | 4        | 5        |          |
|  | 1 Fe | 0.000000 |          |          |          |          |
|  | 2 Fe | 3.559441 | 0.000000 |          |          |          |
|  | 3 C  | 2.147745 | 3.164953 | 0.000000 |          |          |
|  | 4 C  | 3.669409 | 2.002745 | 2.595989 | 0.000000 |          |
|  | 5 C  | 3.165459 | 3.175067 | 2.607912 | 1.646421 | 0.000000 |
|  | 6 C  | 2.035590 | 2.047736 | 2.770616 | 3.239430 | 3.592259 |
|  | 7 B  | 3.323277 | 2.104223 | 1.690094 | 1.664178 | 2.734806 |
|  | 8 B  | 3.304456 | 3.276385 | 1.642471 | 1.706460 | 1.664796 |
|  | 9 B  | 2.039115 | 3.771842 | 1.675777 | 2.743042 | 1.700159 |
|  | 10 B | 2.240349 | 2.258529 | 1.721476 | 2.923624 | 3.500352 |
|  | 11 B | 2.153323 | 3.294716 | 2.880561 | 2.744205 | 1.664024 |
|  | 12 B | 3.300851 | 2.121042 | 3.308839 | 1.688809 | 1.694750 |
|  | 13 B | 2.254310 | 2.261832 | 3.257359 | 2.946217 | 2.858602 |
|  |      | 6        | 7        | 8        | 9        | 10       |
|  | 6 C  | 0.000000 |          |          |          |          |
|  | 7 B  | 2.841072 | 0.000000 |          |          |          |
|  | 8 B  | 3.728547 | 1.743099 | 0.000000 |          |          |
|  | 9 B  | 3.319554 | 2.845748 | 1.780425 | 0.000000 |          |
|  | 10 B | 1.526760 | 1.796148 | 2.935773 | 2.981516 | 0.000000 |
|  | 11 B | 2.850237 | 3.454377 | 2.869099 | 1.772930 | 3.339033 |
|  | 12 B | 2.839056 | 2.931912 | 2.858030 | 2.860979 | 3.330245 |
|  | 13 B | 1.535231 | 3.349418 | 3.678063 | 3.036642 | 2.706362 |
|  |      | 11       | 12       | 13       |          |          |
|  | 11 B | 0.000000 |          |          |          |          |
|  | 12 B | 1.772240 | 0.000000 |          |          |          |
|  | 13 B | 1.794013 | 1.793070 | 0.000000 |          |          |

  

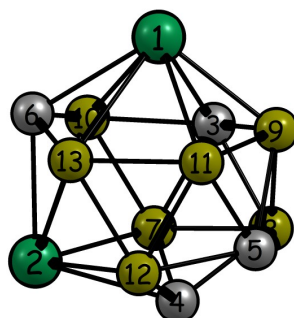

18. -3246.244098 +17.6  $C_1$

WBI: Fe1-Fe2: 0.0799

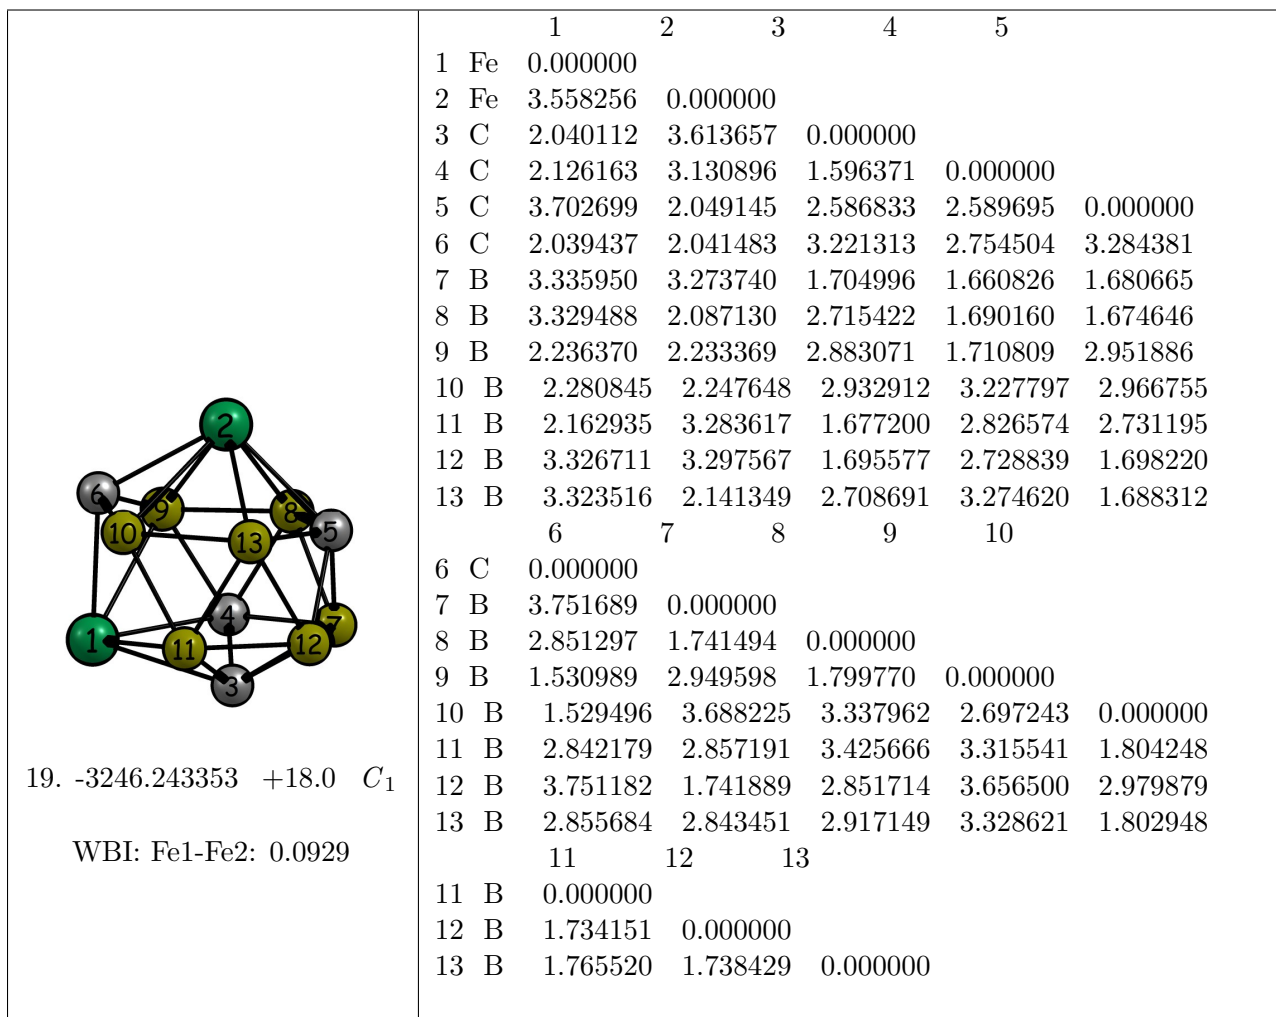

|                                                                                                                                                              |          |          |          |          |          |          |
|--------------------------------------------------------------------------------------------------------------------------------------------------------------|----------|----------|----------|----------|----------|----------|
| 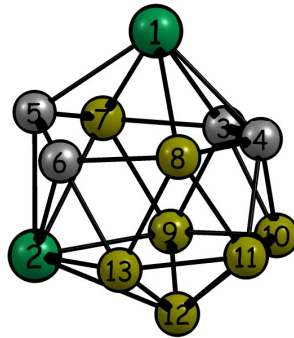 <p>20. -3246.242961 +18.3 <math>C_1</math></p> <p>WBI: Fe1-Fe2: 0.1083</p> | 1        | 2        | 3        | 4        | 5        |          |
|                                                                                                                                                              | 1 Fe     | 0.000000 |          |          |          |          |
|                                                                                                                                                              | 2 Fe     | 3.590663 | 0.000000 |          |          |          |
|                                                                                                                                                              | 3 C      | 2.130350 | 3.146614 | 0.000000 |          |          |
|                                                                                                                                                              | 4 C      | 2.044668 | 3.605281 | 1.585308 | 0.000000 |          |
|                                                                                                                                                              | 5 C      | 2.043961 | 2.000482 | 2.740323 | 3.151421 | 0.000000 |
|                                                                                                                                                              | 6 C      | 2.310182 | 2.133893 | 3.119653 | 2.810476 | 1.445950 |
|                                                                                                                                                              | 7 B      | 2.217429 | 2.229340 | 1.688476 | 2.830580 | 1.541707 |
|                                                                                                                                                              | 8 B      | 2.168132 | 3.261373 | 2.807600 | 1.664870 | 2.729250 |
|                                                                                                                                                              | 9 B      | 3.368281 | 2.139749 | 1.694324 | 2.710481 | 2.866971 |
|                                                                                                                                                              | 10 B     | 3.375420 | 3.298928 | 1.681535 | 1.721307 | 3.726352 |
|                                                                                                                                                              | 11 B     | 3.361517 | 3.291060 | 2.735986 | 1.707552 | 3.670905 |
|                                                                                                                                                              | 12 B     | 3.902396 | 2.115514 | 2.732609 | 2.728374 | 3.362246 |
| 13 B                                                                                                                                                         | 3.388985 | 2.148090 | 3.303931 | 2.722938 | 2.791707 |          |
|                                                                                                                                                              | 6        | 7        | 8        | 9        | 10       |          |
| 6 C                                                                                                                                                          | 0.000000 |          |          |          |          |          |
| 7 B                                                                                                                                                          | 2.594392 | 0.000000 |          |          |          |          |
| 8 B                                                                                                                                                          | 1.702682 | 3.245787 | 0.000000 |          |          |          |
| 9 B                                                                                                                                                          | 3.233481 | 1.811689 | 3.430566 | 0.000000 |          |          |
| 10 B                                                                                                                                                         | 3.556867 | 2.940609 | 2.870847 | 1.737458 | 0.000000 |          |
| 11 B                                                                                                                                                         | 2.831901 | 3.617760 | 1.750237 | 2.857006 | 1.752338 |          |
| 12 B                                                                                                                                                         | 2.940776 | 3.054922 | 2.873837 | 1.756777 | 1.764310 |          |
| 13 B                                                                                                                                                         | 1.684118 | 3.319564 | 1.783748 | 2.963690 | 2.872632 |          |
|                                                                                                                                                              | 11       | 12       | 13       |          |          |          |
| 11 B                                                                                                                                                         | 0.000000 |          |          |          |          |          |
| 12 B                                                                                                                                                         | 1.777967 | 0.000000 |          |          |          |          |
| 13 B                                                                                                                                                         | 1.734905 | 1.781757 | 0.000000 |          |          |          |

Table S4B: Energy ranking for the lowest-lying  $\text{Cp}_2\text{Fe}_2\text{C}_4\text{B}_7\text{H}_{11}$  optimized structures at the B3LYP/6-31G(d) level of theory.

| No. | Initial structure            | Final Energy (a.u.) | Relative Energy (kcal/mol) |
|-----|------------------------------|---------------------|----------------------------|
| 1   | 13v-02-Hen—fe2c4—1407        | -3247.057881        | 0.0                        |
| 2   | 13v-01-Doc—fe2c4—6           | -3247.057806        | 0.0                        |
| 3   | 13v-03-DitrapIcos—fe2c4—2840 | -3247.057792        | 0.1                        |
| 4   | 13v-01-Doc—fe2c4—1144        | -3247.050148        | 4.9                        |
| 5   | 13v-01-Doc—fe2c4—995         | -3247.05014         | 4.9                        |
| 6   | 13v-02-Hen—fe2c4—1325        | -3247.050125        | 4.9                        |
| 7   | 13v-01-Doc—fe2c4—615         | -3247.050115        | 4.9                        |
| 8   | 13v-02-Hen—fe2c4—1394        | -3247.050107        | 4.9                        |
| 9   | 13v-03-DitrapIcos—fe2c4—2105 | -3247.050097        | 4.9                        |
| 10  | 13v-01-Doc—fe2c4—983         | -3247.050062        | 4.9                        |
| 11  | 13v-01-Doc—fe2c4—800         | -3247.04994         | 5.0                        |
| 12  | 13v-01-Doc—fe2c4—596         | -3247.049822        | 5.1                        |
| 13  | 13v-03-DitrapIcos—fe2c4—2092 | -3247.049809        | 5.1                        |
| 14  | 13v-02-Hen—fe2c4—1459        | -3247.047915        | 6.3                        |
| 15  | 13v-02-Hen—fe2c4—1395        | -3247.047906        | 6.3                        |
| 16  | 13v-01-Doc—fe2c4—173         | -3247.047854        | 6.3                        |
| 17  | 13v-02-Hen—fe2c4—1770        | -3247.047823        | 6.3                        |
| 18  | 13v-02-Hen—fe2c4—1454        | -3247.047795        | 6.3                        |
| 19  | 13v-01-Doc—fe2c4—16          | -3247.047771        | 6.3                        |
| 20  | 13v-01-Doc—fe2c4—1133        | -3247.047673        | 6.4                        |
| 21  | 13v-01-Doc—fe2c4—14          | -3247.04765         | 6.4                        |
| 22  | 13v-01-Doc—fe2c4—17          | -3247.044081        | 8.7                        |
| 23  | 13v-02-Hen—fe2c4—1833        | -3247.04403         | 8.7                        |
| 24  | 13v-02-Hen—fe2c4—1455        | -3247.04402         | 8.7                        |
| 25  | 13v-03-DitrapIcos—fe2c4—2243 | -3247.043962        | 8.7                        |
| 26  | 13v-02-Hen—fe2c4—1316        | -3247.04394         | 8.7                        |
| 27  | 13v-03-DitrapIcos—fe2c4—2572 | -3247.043512        | 9.0                        |
| 28  | 13v-01-Doc—fe2c4—48          | -3247.043439        | 9.1                        |
| 29  | 13v-03-DitrapIcos—fe2c4—2691 | -3247.043329        | 9.1                        |
| 30  | 13v-02-Hen—fe2c4—1447        | -3247.04323         | 9.2                        |
| 31  | 13v-02-Hen—fe2c4—1456        | -3247.043041        | 9.3                        |
| 32  | 13v-01-Doc—fe2c4—808         | -3247.040575        | 10.9                       |
| 33  | 13v-02-Hen—fe2c4—2040        | -3247.040559        | 10.9                       |
| 34  | 13v-02-Hen—fe2c4—2023        | -3247.040474        | 10.9                       |
| 35  | 13v-02-Hen—fe2c4—2038        | -3247.040435        | 10.9                       |
| 36  | 13v-02-Hen—fe2c4—2028        | -3247.04034         | 11.0                       |
| 37  | 13v-02-Hen—fe2c4—1567        | -3247.038409        | 12.2                       |
| 38  | 13v-01-Doc—fe2c4—891         | -3247.038188        | 12.4                       |
| 39  | 13v-03-DitrapIcos—fe2c4—2850 | -3247.037504        | 12.8                       |
| 40  | 13v-01-Doc—fe2c4—809         | -3247.037452        | 12.8                       |
| 41  | 13v-04-CapHexAnPr—fe2c4—3397 | -3247.037425        | 12.8                       |
| 42  | 13v-02-Hen—fe2c4—2050        | -3247.037415        | 12.8                       |
| 43  | 13v-02-Hen—fe2c4—2043        | -3247.037414        | 12.8                       |
| 44  | 13v-01-Doc—fe2c4—816         | -3247.037361        | 12.9                       |
| 45  | 13v-01-Doc—fe2c4—1109        | -3247.03604         | 13.7                       |
| 46  | 13v-02-Hen—fe2c4—1763        | -3247.035971        | 13.7                       |
| 47  | 13v-01-Doc—fe2c4—166         | -3247.035928        | 13.8                       |
| 48  | 13v-03-DitrapIcos—fe2c4—2680 | -3247.03586         | 13.8                       |



|    |                               |              |      |
|----|-------------------------------|--------------|------|
| 49 | 13v-02-Hen—fe2c4—-2045        | -3247.035757 | 13.9 |
| 50 | 13v-02-Hen—fe2c4—-2048        | -3247.035736 | 13.9 |
| 51 | 13v-03-DitrapIcos—fe2c4—-2845 | -3247.035735 | 13.9 |
| 52 | 13v-01-Doc—fe2c4—-804         | -3247.035703 | 13.9 |
| 53 | 13v-01-Doc—fe2c4—-805         | -3247.035631 | 14.0 |
| 54 | 13v-02-Hen—fe2c4—-1386        | -3247.035568 | 14.0 |
| 55 | 13v-03-DitrapIcos—fe2c4—-2414 | -3247.034643 | 14.6 |
| 56 | 13v-04-CapHexAnPr—fe2c4—-3431 | -3247.034586 | 14.6 |
| 57 | 13v-01-Doc—fe2c4—-1145        | -3247.034486 | 14.7 |
| 58 | 13v-01-Doc—fe2c4—-996         | -3247.034444 | 14.7 |
| 59 | 13v-02-Hen—fe2c4—-2031        | -3247.034431 | 14.7 |
| 60 | 13v-01-Doc—fe2c4—-778         | -3247.034316 | 14.8 |
| 61 | 13v-03-DitrapIcos—fe2c4—-2841 | -3247.034249 | 14.8 |
| 62 | 13v-03-DitrapIcos—fe2c4—-2832 | -3247.034183 | 14.9 |
| 63 | 13v-03-DitrapIcos—fe2c4—-2871 | -3247.033738 | 15.2 |
| 64 | 13v-02-Hen—fe2c4—-1626        | -3247.031991 | 16.2 |
| 65 | 13v-01-Doc—fe2c4—-1152        | -3247.031944 | 16.3 |
| 66 | 13v-03-DitrapIcos—fe2c4—-2413 | -3247.031904 | 16.3 |
| 67 | 13v-02-Hen—fe2c4—-1773        | -3247.031791 | 16.4 |
| 68 | 13v-03-DitrapIcos—fe2c4—-2834 | -3247.031778 | 16.4 |
| 69 | 13v-02-Hen—fe2c4—-1408        | -3247.031714 | 16.4 |
| 70 | 13v-01-Doc—fe2c4—-15          | -3247.030455 | 17.2 |
| 71 | 13v-01-Doc—fe2c4—-187         | -3247.030415 | 17.2 |
| 72 | 13v-03-DitrapIcos—fe2c4—-2102 | -3247.030395 | 17.2 |
| 73 | 13v-01-Doc—fe2c4—-1120        | -3247.030338 | 17.3 |
| 74 | 13v-01-Doc—fe2c4—-18          | -3247.030337 | 17.3 |
| 75 | 13v-02-Hen—fe2c4—-1765        | -3247.030302 | 17.3 |
| 76 | 13v-03-DitrapIcos—fe2c4—-2561 | -3247.030278 | 17.3 |
| 77 | 13v-03-DitrapIcos—fe2c4—-2083 | -3247.030274 | 17.3 |
| 78 | 13v-03-DitrapIcos—fe2c4—-2632 | -3247.030257 | 17.3 |
| 79 | 13v-01-Doc—fe2c4—-11          | -3247.030249 | 17.3 |
| 80 | 13v-03-DitrapIcos—fe2c4—-2187 | -3247.030242 | 17.3 |
| 81 | 13v-01-Doc—fe2c4—-41          | -3247.030241 | 17.3 |
| 82 | 13v-02-Hen—fe2c4—-1966        | -3247.029809 | 17.6 |
| 83 | 13v-02-Hen—fe2c4—-2044        | -3247.029745 | 17.7 |
| 84 | 13v-02-Hen—fe2c4—-2049        | -3247.029667 | 17.7 |
| 85 | 13v-01-Doc—fe2c4—-980         | -3247.029639 | 17.7 |
| 86 | 13v-03-DitrapIcos—fe2c4—-2373 | -3247.029615 | 17.7 |
| 87 | 13v-01-Doc—fe2c4—-795         | -3247.029607 | 17.7 |
| 88 | 13v-02-Hen—fe2c4—-1841        | -3247.029562 | 17.8 |
| 89 | 13v-03-DitrapIcos—fe2c4—-2704 | -3247.029559 | 17.8 |
| 90 | 13v-03-DitrapIcos—fe2c4—-2637 | -3247.029544 | 17.8 |
| 91 | 13v-03-DitrapIcos—fe2c4—-2246 | -3247.029535 | 17.8 |
| 92 | 13v-02-Hen—fe2c4—-1965        | -3247.029463 | 17.8 |
| 93 | 13v-03-DitrapIcos—fe2c4—-2354 | -3247.029448 | 17.8 |
| 94 | 13v-01-Doc—fe2c4—-145         | -3247.029204 | 18.0 |
| 95 | 13v-01-Doc—fe2c4—-796         | -3247.02895  | 18.2 |
| 96 | 13v-02-Hen—fe2c4—-2039        | -3247.028949 | 18.2 |
| 97 | 13v-01-Doc—fe2c4—-1138        | -3247.02893  | 18.2 |
| 98 | 13v-01-Doc—fe2c4—-1004        | -3247.028927 | 18.2 |
| 99 | 13v-01-Doc—fe2c4—-2           | -3247.02877  | 18.3 |

|     |                              |              |      |
|-----|------------------------------|--------------|------|
| 100 | 13v-03-DitrapIcos—fe2c4—2098 | -3247.028711 | 18.3 |
| 101 | 13v-02-Hen—fe2c4—2032        | -3247.028702 | 18.3 |
| 102 | 13v-01-Doc—fe2c4—1115        | -3247.028667 | 18.3 |
| 103 | 13v-02-Hen—fe2c4—2024        | -3247.028629 | 18.4 |
| 104 | 13v-02-Hen—fe2c4—1369        | -3247.028627 | 18.4 |
| 105 | 13v-03-DitrapIcos—fe2c4—2256 | -3247.028548 | 18.4 |
| 106 | 13v-03-DitrapIcos—fe2c4—2636 | -3247.02845  | 18.5 |
| 107 | 13v-01-Doc—fe2c4—981         | -3247.028412 | 18.5 |
| 108 | 13v-01-Doc—fe2c4—1129        | -3247.028364 | 18.5 |
| 109 | 13v-02-Hen—fe2c4—2029        | -3247.028298 | 18.6 |
| 110 | 13v-02-Hen—fe2c4—2027        | -3247.028286 | 18.6 |
| 111 | 13v-01-Doc—fe2c4—153         | -3247.028276 | 18.6 |
| 112 | 13v-02-Hen—fe2c4—1777        | -3247.028217 | 18.6 |
| 113 | 13v-02-Hen—fe2c4—1393        | -3247.028164 | 18.6 |
| 114 | 13v-01-Doc—fe2c4—791         | -3247.02812  | 18.7 |
| 115 | 13v-03-DitrapIcos—fe2c4—2412 | -3247.028058 | 18.7 |
| 116 | 13v-03-DitrapIcos—fe2c4—2242 | -3247.027944 | 18.8 |
| 117 | 13v-03-DitrapIcos—fe2c4—2567 | -3247.027918 | 18.8 |
| 118 | 13v-02-Hen—fe2c4—1980        | -3247.027842 | 18.9 |
| 119 | 13v-03-DitrapIcos—fe2c4—2162 | -3247.027608 | 19.0 |
| 120 | 13v-01-Doc—fe2c4—442         | -3247.027545 | 19.0 |
| 121 | 13v-03-DitrapIcos—fe2c4—2421 | -3247.027425 | 19.1 |
| 122 | 13v-02-Hen—fe2c4—1470        | -3247.027349 | 19.2 |
| 123 | 13v-01-Doc—fe2c4—457         | -3247.027194 | 19.3 |
| 124 | 13v-01-Doc—fe2c4—1124        | -3247.027083 | 19.3 |
| 125 | 13v-02-Hen—fe2c4—1987        | -3247.026832 | 19.5 |
| 126 | 13v-01-Doc—fe2c4—281         | -3247.026827 | 19.5 |
| 127 | 13v-01-Doc—fe2c4—29          | -3247.026815 | 19.5 |
| 128 | 13v-02-Hen—fe2c4—1764        | -3247.026791 | 19.5 |
| 129 | 13v-02-Hen—fe2c4—1788        | -3247.026761 | 19.5 |
| 130 | 13v-04-CapHexAnPr—fe2c4—3313 | -3247.026751 | 19.5 |
| 131 | 13v-01-Doc—fe2c4—969         | -3247.026748 | 19.5 |
| 132 | 13v-01-Doc—fe2c4—1114        | -3247.026616 | 19.6 |
| 133 | 13v-02-Hen—fe2c4—1580        | -3247.026562 | 19.7 |
| 134 | 13v-02-Hen—fe2c4—1769        | -3247.026547 | 19.7 |
| 135 | 13v-02-Hen—fe2c4—1781        | -3247.025983 | 20.0 |
| 136 | 13v-01-Doc—fe2c4—801         | -3247.025909 | 20.1 |
| 137 | 13v-02-Hen—fe2c4—1323        | -3247.025737 | 20.2 |
| 138 | 13v-02-Hen—fe2c4—1318        | -3247.025736 | 20.2 |
| 139 | 13v-03-DitrapIcos—fe2c4—2635 | -3247.023964 | 21.3 |
| 140 | 13v-02-Hen—fe2c4—1449        | -3247.023951 | 21.3 |
| 141 | 13v-02-Hen—fe2c4—1398        | -3247.023942 | 21.3 |
| 142 | 13v-02-Hen—fe2c4—1457        | -3247.023859 | 21.3 |
| 143 | 13v-01-Doc—fe2c4—1134        | -3247.023817 | 21.4 |
| 144 | 13v-01-Doc—fe2c4—7           | -3247.023801 | 21.4 |
| 145 | 13v-01-Doc—fe2c4—770         | -3247.023784 | 21.4 |
| 146 | 13v-02-Hen—fe2c4—1835        | -3247.02378  | 21.4 |
| 147 | 13v-03-DitrapIcos—fe2c4—2352 | -3247.023737 | 21.4 |
| 148 | 13v-03-DitrapIcos—fe2c4—2695 | -3247.023689 | 21.5 |
| 149 | 13v-01-Doc—fe2c4—10          | -3247.023237 | 21.7 |
| 150 | 13v-02-Hen—fe2c4—1310        | -3247.023125 | 21.8 |

|     |                              |              |      |
|-----|------------------------------|--------------|------|
| 151 | 13v-02-Hen—fe2c4—1458        | -3247.023109 | 21.8 |
| 152 | 13v-03-DitrapIcos—fe2c4—2104 | -3247.023095 | 21.8 |
| 153 | 13v-03-DitrapIcos—fe2c4—2682 | -3247.023082 | 21.8 |
| 154 | 13v-03-DitrapIcos—fe2c4—2087 | -3247.023059 | 21.9 |
| 155 | 13v-02-Hen—fe2c4—1774        | -3247.023005 | 21.9 |
| 156 | 13v-02-Hen—fe2c4—1317        | -3247.022994 | 21.9 |
| 157 | 13v-03-DitrapIcos—fe2c4—2698 | -3247.022938 | 21.9 |
| 158 | 13v-01-Doc—fe2c4—46          | -3247.022834 | 22.0 |
| 159 | 13v-02-Hen—fe2c4—1446        | -3247.022818 | 22.0 |
| 160 | 13v-01-Doc—fe2c4—1146        | -3247.022814 | 22.0 |
| 161 | 13v-03-DitrapIcos—fe2c4—2362 | -3247.022801 | 22.0 |
| 162 | 13v-01-Doc—fe2c4—36          | -3247.022722 | 22.1 |
| 163 | 13v-01-Doc—fe2c4—1136        | -3247.022006 | 22.5 |
| 164 | 13v-03-DitrapIcos—fe2c4—2693 | -3247.021881 | 22.6 |
| 165 | 13v-01-Doc—fe2c4—783         | -3247.021823 | 22.6 |
| 166 | 13v-02-Hen—fe2c4—1783        | -3247.02178  | 22.7 |
| 167 | 13v-02-Hen—fe2c4—1780        | -3247.021747 | 22.7 |
| 168 | 13v-01-Doc—fe2c4—1123        | -3247.021614 | 22.8 |
| 169 | 13v-02-Hen—fe2c4—1766        | -3247.021399 | 22.9 |
| 170 | 13v-03-DitrapIcos—fe2c4—2562 | -3247.021391 | 22.9 |
| 171 | 13v-03-DitrapIcos—fe2c4—2795 | -3247.021334 | 22.9 |
| 172 | 13v-03-DitrapIcos—fe2c4—2564 | -3247.021282 | 23.0 |
| 173 | 13v-02-Hen—fe2c4—1787        | -3247.021246 | 23.0 |
| 174 | 13v-02-Hen—fe2c4—1307        | -3247.021216 | 23.0 |
| 175 | 13v-03-DitrapIcos—fe2c4—2781 | -3247.020949 | 23.2 |
| 176 | 13v-01-Doc—fe2c4—376         | -3247.020889 | 23.2 |
| 177 | 13v-01-Doc—fe2c4—188         | -3247.020765 | 23.3 |
| 178 | 13v-01-Doc—fe2c4—890         | -3247.020757 | 23.3 |
| 179 | 13v-04-CapHexAnPr—fe2c4—3583 | -3247.020694 | 23.3 |
| 180 | 13v-03-DitrapIcos—fe2c4—2831 | -3247.020683 | 23.3 |
| 181 | 13v-03-DitrapIcos—fe2c4—2703 | -3247.020678 | 23.3 |
| 182 | 13v-01-Doc—fe2c4—772         | -3247.020546 | 23.4 |
| 183 | 13v-03-DitrapIcos—fe2c4—2094 | -3247.020526 | 23.4 |
| 184 | 13v-02-Hen—fe2c4—1322        | -3247.020421 | 23.5 |
| 185 | 13v-01-Doc—fe2c4—1147        | -3247.020409 | 23.5 |
| 186 | 13v-01-Doc—fe2c4—32          | -3247.020328 | 23.6 |
| 187 | 13v-02-Hen—fe2c4—1775        | -3247.020175 | 23.7 |
| 188 | 13v-01-Doc—fe2c4—1110        | -3247.019979 | 23.8 |
| 189 | 13v-01-Doc—fe2c4—1296        | -3247.019794 | 23.9 |
| 190 | 13v-01-Doc—fe2c4—965         | -3247.019723 | 23.9 |
| 191 | 13v-01-Doc—fe2c4—47          | -3247.018855 | 24.5 |
| 192 | 13v-01-Doc—fe2c4—28          | -3247.018762 | 24.5 |
| 193 | 13v-02-Hen—fe2c4—1466        | -3247.018607 | 24.6 |
| 194 | 13v-03-DitrapIcos—fe2c4—2775 | -3247.018566 | 24.7 |
| 195 | 13v-03-DitrapIcos—fe2c4—2367 | -3247.017398 | 25.4 |
| 196 | 13v-01-Doc—fe2c4—360         | -3247.017293 | 25.5 |
| 197 | 13v-02-Hen—fe2c4—1899        | -3247.017225 | 25.5 |
| 198 | 13v-02-Hen—fe2c4—1880        | -3247.016902 | 25.7 |
| 199 | 13v-01-Doc—fe2c4—977         | -3247.016771 | 25.8 |
| 200 | 13v-02-Hen—fe2c4—1971        | -3247.016737 | 25.8 |
| 201 | 13v-01-Doc—fe2c4—26          | -3247.016689 | 25.8 |

|     |                              |              |      |
|-----|------------------------------|--------------|------|
| 202 | 13v-02-Hen—fe2c4—1467        | -3247.016471 | 26.0 |
| 203 | 13v-03-DitrapIcos—fe2c4—2249 | -3247.016336 | 26.1 |
| 204 | 13v-02-Hen—fe2c4—2068        | -3247.015759 | 26.4 |
| 205 | 13v-02-Hen—fe2c4—1665        | -3247.015756 | 26.4 |
| 206 | 13v-03-DitrapIcos—fe2c4—2865 | -3247.015549 | 26.6 |
| 207 | 13v-01-Doc—fe2c4—1288        | -3247.015167 | 26.8 |
| 208 | 13v-02-Hen—fe2c4—1400        | -3247.014936 | 26.9 |
| 209 | 13v-01-Doc—fe2c4—476         | -3247.014837 | 27.0 |
| 210 | 13v-01-Doc—fe2c4—943         | -3247.014765 | 27.1 |
| 211 | 13v-01-Doc—fe2c4—455         | -3247.014652 | 27.1 |
| 212 | 13v-02-Hen—fe2c4—1566        | -3247.014603 | 27.2 |
| 213 | 13v-04-CapHexAnPr—fe2c4—3469 | -3247.014576 | 27.2 |
| 214 | 13v-01-Doc—fe2c4—869         | -3247.014567 | 27.2 |
| 215 | 13v-03-DitrapIcos—fe2c4—2366 | -3247.014532 | 27.2 |
| 216 | 13v-01-Doc—fe2c4—171         | -3247.01452  | 27.2 |
| 217 | 13v-01-Doc—fe2c4—889         | -3247.014507 | 27.2 |
| 218 | 13v-02-Hen—fe2c4—1634        | -3247.014462 | 27.2 |
| 219 | 13v-02-Hen—fe2c4—1565        | -3247.014454 | 27.3 |
| 220 | 13v-01-Doc—fe2c4—872         | -3247.014442 | 27.3 |
| 221 | 13v-01-Doc—fe2c4—879         | -3247.01434  | 27.3 |
| 222 | 13v-01-Doc—fe2c4—355         | -3247.014324 | 27.3 |
| 223 | 13v-02-Hen—fe2c4—1502        | -3247.014236 | 27.4 |
| 224 | 13v-03-DitrapIcos—fe2c4—2181 | -3247.01421  | 27.4 |
| 225 | 13v-01-Doc—fe2c4—255         | -3247.014186 | 27.4 |
| 226 | 13v-01-Doc—fe2c4—176         | -3247.014156 | 27.4 |
| 227 | 13v-03-DitrapIcos—fe2c4—2641 | -3247.014138 | 27.4 |
| 228 | 13v-01-Doc—fe2c4—976         | -3247.014102 | 27.5 |
| 229 | 13v-02-Hen—fe2c4—1612        | -3247.014088 | 27.5 |
| 230 | 13v-02-Hen—fe2c4—1819        | -3247.014077 | 27.5 |
| 231 | 13v-03-DitrapIcos—fe2c4—2786 | -3247.014028 | 27.5 |
| 232 | 13v-02-Hen—fe2c4—1517        | -3247.013876 | 27.6 |
| 233 | 13v-01-Doc—fe2c4—341         | -3247.013869 | 27.6 |
| 234 | 13v-03-DitrapIcos—fe2c4—2153 | -3247.013819 | 27.6 |
| 235 | 13v-03-DitrapIcos—fe2c4—2312 | -3247.013819 | 27.6 |
| 236 | 13v-01-Doc—fe2c4—994         | -3247.013799 | 27.7 |
| 237 | 13v-02-Hen—fe2c4—1300        | -3247.013778 | 27.7 |
| 238 | 13v-01-Doc—fe2c4—475         | -3247.01375  | 27.7 |
| 239 | 13v-02-Hen—fe2c4—1507        | -3247.013688 | 27.7 |
| 240 | 13v-03-DitrapIcos—fe2c4—2791 | -3247.013669 | 27.7 |
| 241 | 13v-02-Hen—fe2c4—2069        | -3247.013646 | 27.8 |
| 242 | 13v-03-DitrapIcos—fe2c4—2622 | -3247.013588 | 27.8 |
| 243 | 13v-01-Doc—fe2c4—21          | -3247.013554 | 27.8 |
| 244 | 13v-03-DitrapIcos—fe2c4—2431 | -3247.013496 | 27.9 |
| 245 | 13v-01-Doc—fe2c4—1130        | -3247.013442 | 27.9 |
| 246 | 13v-01-Doc—fe2c4—1284        | -3247.013414 | 27.9 |
| 247 | 13v-03-DitrapIcos—fe2c4—2253 | -3247.013318 | 28.0 |
| 248 | 13v-01-Doc—fe2c4—1264        | -3247.013281 | 28.0 |
| 249 | 13v-01-Doc—fe2c4—451         | -3247.013279 | 28.0 |
| 250 | 13v-02-Hen—fe2c4—1314        | -3247.013266 | 28.0 |
| 251 | 13v-03-DitrapIcos—fe2c4—2096 | -3247.013221 | 28.0 |
| 252 | 13v-03-DitrapIcos—fe2c4—2101 | -3247.013208 | 28.0 |

|     |                              |              |      |
|-----|------------------------------|--------------|------|
| 253 | 13v-03-DitrapIcos—fe2c4—2868 | -3247.013205 | 28.0 |
| 254 | 13v-02-Hen—fe2c4—2058        | -3247.013137 | 28.1 |
| 255 | 13v-03-DitrapIcos—fe2c4—2881 | -3247.013135 | 28.1 |
| 256 | 13v-01-Doc—fe2c4—986         | -3247.013075 | 28.1 |
| 257 | 13v-02-Hen—fe2c4—2070        | -3247.012957 | 28.2 |
| 258 | 13v-01-Doc—fe2c4—953         | -3247.012733 | 28.3 |
| 259 | 13v-02-Hen—fe2c4—2077        | -3247.012699 | 28.4 |
| 260 | 13v-03-DitrapIcos—fe2c4—2241 | -3247.012345 | 28.6 |
| 261 | 13v-01-Doc—fe2c4—473         | -3247.012212 | 28.7 |
| 262 | 13v-01-Doc—fe2c4—466         | -3247.012162 | 28.7 |
| 263 | 13v-02-Hen—fe2c4—1977        | -3247.012154 | 28.7 |
| 264 | 13v-02-Hen—fe2c4—1468        | -3247.012136 | 28.7 |
| 265 | 13v-04-CapHexAnPr—fe2c4—3534 | -3247.012036 | 28.8 |
| 266 | 13v-04-CapHexAnPr—fe2c4—3454 | -3247.012004 | 28.8 |
| 267 | 13v-03-DitrapIcos—fe2c4—2305 | -3247.011947 | 28.8 |
| 268 | 13v-01-Doc—fe2c4—149         | -3247.011906 | 28.9 |
| 269 | 13v-02-Hen—fe2c4—1944        | -3247.011848 | 28.9 |
| 270 | 13v-01-Doc—fe2c4—899         | -3247.011826 | 28.9 |
| 271 | 13v-01-Doc—fe2c4—327         | -3247.011775 | 28.9 |
| 272 | 13v-03-DitrapIcos—fe2c4—2247 | -3247.011726 | 29.0 |
| 273 | 13v-02-Hen—fe2c4—1970        | -3247.011721 | 29.0 |
| 274 | 13v-01-Doc—fe2c4—758         | -3247.011664 | 29.0 |
| 275 | 13v-02-Hen—fe2c4—1441        | -3247.011659 | 29.0 |
| 276 | 13v-01-Doc—fe2c4—433         | -3247.011605 | 29.0 |
| 277 | 13v-01-Doc—fe2c4—993         | -3247.011504 | 29.1 |
| 278 | 13v-03-DitrapIcos—fe2c4—2332 | -3247.011483 | 29.1 |
| 279 | 13v-01-Doc—fe2c4—148         | -3247.011397 | 29.2 |
| 280 | 13v-01-Doc—fe2c4—898         | -3247.011383 | 29.2 |
| 281 | 13v-03-DitrapIcos—fe2c4—2422 | -3247.011287 | 29.2 |
| 282 | 13v-02-Hen—fe2c4—2079        | -3247.011195 | 29.3 |
| 283 | 13v-01-Doc—fe2c4—1251        | -3247.011127 | 29.3 |
| 284 | 13v-04-CapHexAnPr—fe2c4—2991 | -3247.011121 | 29.3 |
| 285 | 13v-04-CapHexAnPr—fe2c4—2969 | -3247.011006 | 29.4 |
| 286 | 13v-01-Doc—fe2c4—960         | -3247.010837 | 29.5 |
| 287 | 13v-02-Hen—fe2c4—1667        | -3247.010642 | 29.6 |
| 288 | 13v-02-Hen—fe2c4—2062        | -3247.010628 | 29.7 |
| 289 | 13v-02-Hen—fe2c4—2055        | -3247.010499 | 29.7 |
| 290 | 13v-03-DitrapIcos—fe2c4—2441 | -3247.010362 | 29.8 |
| 291 | 13v-02-Hen—fe2c4—1399        | -3247.01032  | 29.8 |
| 292 | 13v-02-Hen—fe2c4—2067        | -3247.01031  | 29.9 |
| 293 | 13v-03-DitrapIcos—fe2c4—2876 | -3247.010307 | 29.9 |
| 294 | 13v-01-Doc—fe2c4—948         | -3247.010298 | 29.9 |
| 295 | 13v-02-Hen—fe2c4—2072        | -3247.010272 | 29.9 |
| 296 | 13v-01-Doc—fe2c4—947         | -3247.010261 | 29.9 |
| 297 | 13v-01-Doc—fe2c4—37          | -3247.010194 | 29.9 |
| 298 | 13v-03-DitrapIcos—fe2c4—2652 | -3247.010167 | 29.9 |
| 299 | 13v-01-Doc—fe2c4—1240        | -3247.009909 | 30.1 |
| 300 | 13v-03-DitrapIcos—fe2c4—2582 | -3247.009724 | 30.2 |
| 301 | 13v-03-DitrapIcos—fe2c4—2670 | -3247.009476 | 30.4 |
| 302 | 13v-02-Hen—fe2c4—2064        | -3247.009289 | 30.5 |
| 303 | 13v-01-Doc—fe2c4—952         | -3247.009216 | 30.5 |

|     |                               |              |      |
|-----|-------------------------------|--------------|------|
| 304 | 13v-02-Hen—fe2c4—-2051        | -3247.009176 | 30.6 |
| 305 | 13v-03-DitrapIcos—fe2c4—-2654 | -3247.009144 | 30.6 |
| 306 | 13v-03-DitrapIcos—fe2c4—-2872 | -3247.009035 | 30.7 |
| 307 | 13v-03-DitrapIcos—fe2c4—-2862 | -3247.008877 | 30.8 |
| 308 | 13v-02-Hen—fe2c4—-1858        | -3247.00884  | 30.8 |
| 309 | 13v-01-Doc—fe2c4—-178         | -3247.008819 | 30.8 |
| 310 | 13v-01-Doc—fe2c4—-921         | -3247.008817 | 30.8 |
| 311 | 13v-01-Doc—fe2c4—-961         | -3247.00867  | 30.9 |
| 312 | 13v-01-Doc—fe2c4—-1112        | -3247.008666 | 30.9 |
| 313 | 13v-02-Hen—fe2c4—-1761        | -3247.008655 | 30.9 |
| 314 | 13v-01-Doc—fe2c4—-963         | -3247.008626 | 30.9 |
| 315 | 13v-01-Doc—fe2c4—-774         | -3247.008017 | 31.3 |
| 316 | 13v-02-Hen—fe2c4—-1830        | -3247.007915 | 31.4 |
| 317 | 13v-03-DitrapIcos—fe2c4—-2686 | -3247.007639 | 31.5 |
| 318 | 13v-02-Hen—fe2c4—-1985        | -3247.007519 | 31.6 |
| 319 | 13v-03-DitrapIcos—fe2c4—-2665 | -3247.007493 | 31.6 |
| 320 | 13v-02-Hen—fe2c4—-1619        | -3247.007399 | 31.7 |
| 321 | 13v-03-DitrapIcos—fe2c4—-2462 | -3247.007346 | 31.7 |
| 322 | 13v-03-DitrapIcos—fe2c4—-2183 | -3247.007219 | 31.8 |
| 323 | 13v-02-Hen—fe2c4—-1632        | -3247.007125 | 31.9 |
| 324 | 13v-01-Doc—fe2c4—-192         | -3247.007107 | 31.9 |
| 325 | 13v-03-DitrapIcos—fe2c4—-2180 | -3247.006994 | 31.9 |
| 326 | 13v-03-DitrapIcos—fe2c4—-2835 | -3247.006872 | 32.0 |
| 327 | 13v-03-DitrapIcos—fe2c4—-2415 | -3247.006769 | 32.1 |
| 328 | 13v-02-Hen—fe2c4—-1991        | -3247.006737 | 32.1 |
| 329 | 13v-03-DitrapIcos—fe2c4—-2427 | -3247.006619 | 32.2 |
| 330 | 13v-02-Hen—fe2c4—-1403        | -3247.006611 | 32.2 |
| 331 | 13v-02-Hen—fe2c4—-1624        | -3247.006578 | 32.2 |
| 332 | 13v-01-Doc—fe2c4—-479         | -3247.006566 | 32.2 |
| 333 | 13v-01-Doc—fe2c4—-784         | -3247.006533 | 32.2 |
| 334 | 13v-02-Hen—fe2c4—-1779        | -3247.006486 | 32.3 |
| 335 | 13v-03-DitrapIcos—fe2c4—-2846 | -3247.006468 | 32.3 |
| 336 | 13v-03-DitrapIcos—fe2c4—-2859 | -3247.006459 | 32.3 |
| 337 | 13v-03-DitrapIcos—fe2c4—-2852 | -3247.006434 | 32.3 |
| 338 | 13v-03-DitrapIcos—fe2c4—-2259 | -3247.006427 | 32.3 |
| 339 | 13v-03-DitrapIcos—fe2c4—-2854 | -3247.006427 | 32.3 |
| 340 | 13v-02-Hen—fe2c4—-1832        | -3247.006266 | 32.4 |
| 341 | 13v-02-Hen—fe2c4—-1313        | -3247.006048 | 32.5 |
| 342 | 13v-03-DitrapIcos—fe2c4—-2576 | -3247.005911 | 32.6 |
| 343 | 13v-04-CapHexAnPr—fe2c4—-2986 | -3247.005834 | 32.7 |
| 344 | 13v-02-Hen—fe2c4—-1397        | -3247.005712 | 32.7 |
| 345 | 13v-01-Doc—fe2c4—-922         | -3247.005617 | 32.8 |
| 346 | 13v-04-CapHexAnPr—fe2c4—-3001 | -3247.005582 | 32.8 |
| 347 | 13v-01-Doc—fe2c4—-592         | -3247.005571 | 32.8 |
| 348 | 13v-03-DitrapIcos—fe2c4—-2842 | -3247.005454 | 32.9 |
| 349 | 13v-01-Doc—fe2c4—-787         | -3247.005237 | 33.0 |
| 350 | 13v-03-DitrapIcos—fe2c4—-2692 | -3247.005235 | 33.0 |
| 351 | 13v-03-DitrapIcos—fe2c4—-2787 | -3247.005163 | 33.1 |
| 352 | 13v-04-CapHexAnPr—fe2c4—-3385 | -3247.005134 | 33.1 |
| 353 | 13v-02-Hen—fe2c4—-1889        | -3247.005118 | 33.1 |
| 354 | 13v-03-DitrapIcos—fe2c4—-2251 | -3247.005082 | 33.1 |

|     |                              |              |      |
|-----|------------------------------|--------------|------|
| 355 | 13v-02-Hen—fe2c4—1638        | -3247.00454  | 33.5 |
| 356 | 13v-04-CapHexAnPr—fe2c4—3086 | -3247.004062 | 33.8 |
| 357 | 13v-02-Hen—fe2c4—1644        | -3247.004059 | 33.8 |
| 358 | 13v-01-Doc—fe2c4—1151        | -3247.003921 | 33.9 |
| 359 | 13v-03-DitrapIcos—fe2c4—2776 | -3247.003844 | 33.9 |
| 360 | 13v-03-DitrapIcos—fe2c4—2541 | -3247.003828 | 33.9 |
| 361 | 13v-03-DitrapIcos—fe2c4—2627 | -3247.003821 | 33.9 |
| 362 | 13v-02-Hen—fe2c4—1620        | -3247.003811 | 33.9 |
| 363 | 13v-02-Hen—fe2c4—1617        | -3247.003788 | 33.9 |
| 364 | 13v-02-Hen—fe2c4—1829        | -3247.003787 | 33.9 |
| 365 | 13v-01-Doc—fe2c4—472         | -3247.003746 | 34.0 |
| 366 | 13v-01-Doc—fe2c4—458         | -3247.003726 | 34.0 |
| 367 | 13v-01-Doc—fe2c4—585         | -3247.003712 | 34.0 |
| 368 | 13v-01-Doc—fe2c4—182         | -3247.003666 | 34.0 |
| 369 | 13v-03-DitrapIcos—fe2c4—2697 | -3247.003652 | 34.0 |
| 370 | 13v-04-CapHexAnPr—fe2c4—3015 | -3247.003607 | 34.1 |
| 371 | 13v-03-DitrapIcos—fe2c4—2772 | -3247.003605 | 34.1 |
| 372 | 13v-01-Doc—fe2c4—443         | -3247.003597 | 34.1 |
| 373 | 13v-04-CapHexAnPr—fe2c4—3016 | -3247.003542 | 34.1 |
| 374 | 13v-03-DitrapIcos—fe2c4—2239 | -3247.003337 | 34.2 |
| 375 | 13v-01-Doc—fe2c4—1157        | -3247.003049 | 34.4 |
| 376 | 13v-02-Hen—fe2c4—1968        | -3247.002562 | 34.7 |
| 377 | 13v-02-Hen—fe2c4—1840        | -3247.002441 | 34.8 |
| 378 | 13v-02-Hen—fe2c4—1964        | -3247.001844 | 35.2 |
| 379 | 13v-01-Doc—fe2c4—998         | -3247.001809 | 35.2 |
| 380 | 13v-03-DitrapIcos—fe2c4—2837 | -3247.001759 | 35.2 |
| 381 | 13v-03-DitrapIcos—fe2c4—2313 | -3247.001677 | 35.3 |
| 382 | 13v-01-Doc—fe2c4—361         | -3247.00162  | 35.3 |
| 383 | 13v-03-DitrapIcos—fe2c4—2794 | -3247.001533 | 35.4 |
| 384 | 13v-02-Hen—fe2c4—1461        | -3247.001076 | 35.6 |
| 385 | 13v-02-Hen—fe2c4—1869        | -3247.000964 | 35.7 |
| 386 | 13v-01-Doc—fe2c4—250         | -3247.000948 | 35.7 |
| 387 | 13v-01-Doc—fe2c4—1034        | -3247.000777 | 35.8 |
| 388 | 13v-03-DitrapIcos—fe2c4—2811 | -3247.000753 | 35.8 |
| 389 | 13v-02-Hen—fe2c4—1881        | -3247.00074  | 35.9 |
| 390 | 13v-02-Hen—fe2c4—2010        | -3247.000716 | 35.9 |
| 391 | 13v-02-Hen—fe2c4—1826        | -3247.000645 | 35.9 |
| 392 | 13v-02-Hen—fe2c4—1712        | -3247.00059  | 36.0 |
| 393 | 13v-02-Hen—fe2c4—1798        | -3247.000569 | 36.0 |
| 394 | 13v-02-Hen—fe2c4—1984        | -3247.000502 | 36.0 |
| 395 | 13v-03-DitrapIcos—fe2c4—2190 | -3247.000469 | 36.0 |
| 396 | 13v-01-Doc—fe2c4—167         | -3247.000449 | 36.0 |
| 397 | 13v-02-Hen—fe2c4—1862        | -3247.000348 | 36.1 |
| 398 | 13v-02-Hen—fe2c4—1401        | -3247.00013  | 36.2 |
| 399 | 13v-02-Hen—fe2c4—1410        | -3247.000008 | 36.3 |
| 400 | 13v-03-DitrapIcos—fe2c4—2788 | -3246.999791 | 36.5 |
| 401 | 13v-03-DitrapIcos—fe2c4—2584 | -3246.999779 | 36.5 |
| 402 | 13v-01-Doc—fe2c4—276         | -3246.999733 | 36.5 |
| 403 | 13v-03-DitrapIcos—fe2c4—2705 | -3246.999694 | 36.5 |
| 404 | 13v-01-Doc—fe2c4—246         | -3246.999637 | 36.5 |
| 405 | 13v-01-Doc—fe2c4—902         | -3246.999555 | 36.6 |

|     |                                |              |      |
|-----|--------------------------------|--------------|------|
| 406 | 13v-02-Hen--fe2c4--1762        | -3246.999499 | 36.6 |
| 407 | 13v-02-Hen--fe2c4--1900        | -3246.999148 | 36.9 |
| 408 | 13v-01-Doc--fe2c4--990         | -3246.999017 | 36.9 |
| 409 | 13v-02-Hen--fe2c4--2054        | -3246.998743 | 37.1 |
| 410 | 13v-04-CapHexAnPr--fe2c4--3586 | -3246.998738 | 37.1 |
| 411 | 13v-01-Doc--fe2c4--155         | -3246.99843  | 37.3 |
| 412 | 13v-01-Doc--fe2c4--1000        | -3246.9984   | 37.3 |
| 413 | 13v-01-Doc--fe2c4--248         | -3246.998357 | 37.4 |
| 414 | 13v-02-Hen--fe2c4--1430        | -3246.998336 | 37.4 |
| 415 | 13v-03-DitrapIcos--fe2c4--2620 | -3246.99808  | 37.5 |
| 416 | 13v-01-Doc--fe2c4--900         | -3246.998075 | 37.5 |
| 417 | 13v-02-Hen--fe2c4--1967        | -3246.998066 | 37.5 |
| 418 | 13v-02-Hen--fe2c4--1453        | -3246.998016 | 37.6 |
| 419 | 13v-03-DitrapIcos--fe2c4--2141 | -3246.998007 | 37.6 |
| 420 | 13v-02-Hen--fe2c4--1828        | -3246.997963 | 37.6 |
| 421 | 13v-03-DitrapIcos--fe2c4--2474 | -3246.997902 | 37.6 |
| 422 | 13v-01-Doc--fe2c4--309         | -3246.997871 | 37.7 |
| 423 | 13v-01-Doc--fe2c4--1074        | -3246.997743 | 37.7 |
| 424 | 13v-03-DitrapIcos--fe2c4--2504 | -3246.997585 | 37.8 |
| 425 | 13v-02-Hen--fe2c4--1339        | -3246.997547 | 37.9 |
| 426 | 13v-01-Doc--fe2c4--944         | -3246.997062 | 38.2 |
| 427 | 13v-02-Hen--fe2c4--2061        | -3246.997062 | 38.2 |
| 428 | 13v-01-Doc--fe2c4--803         | -3246.996934 | 38.2 |
| 429 | 13v-02-Hen--fe2c4--2078        | -3246.99683  | 38.3 |
| 430 | 13v-01-Doc--fe2c4--991         | -3246.996826 | 38.3 |
| 431 | 13v-03-DitrapIcos--fe2c4--2702 | -3246.996826 | 38.3 |
| 432 | 13v-02-Hen--fe2c4--1870        | -3246.996796 | 38.3 |
| 433 | 13v-01-Doc--fe2c4--1127        | -3246.996736 | 38.4 |
| 434 | 13v-01-Doc--fe2c4--799         | -3246.996729 | 38.4 |
| 435 | 13v-01-Doc--fe2c4--169         | -3246.996677 | 38.4 |
| 436 | 13v-01-Doc--fe2c4--951         | -3246.996663 | 38.4 |
| 437 | 13v-02-Hen--fe2c4--1767        | -3246.996544 | 38.5 |
| 438 | 13v-02-Hen--fe2c4--1411        | -3246.996539 | 38.5 |
| 439 | 13v-02-Hen--fe2c4--1621        | -3246.996536 | 38.5 |
| 440 | 13v-03-DitrapIcos--fe2c4--2444 | -3246.996484 | 38.5 |
| 441 | 13v-01-Doc--fe2c4--1132        | -3246.996421 | 38.6 |
| 442 | 13v-02-Hen--fe2c4--2071        | -3246.996414 | 38.6 |
| 443 | 13v-03-DitrapIcos--fe2c4--2272 | -3246.996401 | 38.6 |
| 444 | 13v-02-Hen--fe2c4--1670        | -3246.996351 | 38.6 |
| 445 | 13v-02-Hen--fe2c4--1547        | -3246.996327 | 38.6 |
| 446 | 13v-01-Doc--fe2c4--661         | -3246.996297 | 38.6 |
| 447 | 13v-02-Hen--fe2c4--1647        | -3246.996244 | 38.7 |
| 448 | 13v-03-DitrapIcos--fe2c4--2777 | -3246.996098 | 38.8 |
| 449 | 13v-01-Doc--fe2c4--470         | -3246.995908 | 38.9 |
| 450 | 13v-03-DitrapIcos--fe2c4--2683 | -3246.995686 | 39.0 |
| 451 | 13v-02-Hen--fe2c4--1990        | -3246.995622 | 39.1 |
| 452 | 13v-01-Doc--fe2c4--1265        | -3246.995579 | 39.1 |
| 453 | 13v-02-Hen--fe2c4--1976        | -3246.995578 | 39.1 |
| 454 | 13v-03-DitrapIcos--fe2c4--2258 | -3246.99539  | 39.2 |
| 455 | 13v-01-Doc--fe2c4--467         | -3246.995364 | 39.2 |
| 456 | 13v-02-Hen--fe2c4--2025        | -3246.995293 | 39.3 |



|     |                              |              |      |
|-----|------------------------------|--------------|------|
| 457 | 13v-02-Hen—fe2c4—1846        | -3246.995254 | 39.3 |
| 458 | 13v-01-Doc—fe2c4—383         | -3246.995238 | 39.3 |
| 459 | 13v-03-DitrapIcos—fe2c4—2662 | -3246.995216 | 39.3 |
| 460 | 13v-02-Hen—fe2c4—1898        | -3246.99514  | 39.4 |
| 461 | 13v-02-Hen—fe2c4—2065        | -3246.995129 | 39.4 |
| 462 | 13v-03-DitrapIcos—fe2c4—2178 | -3246.995094 | 39.4 |
| 463 | 13v-01-Doc—fe2c4—1128        | -3246.995057 | 39.4 |
| 464 | 13v-01-Doc—fe2c4—586         | -3246.995023 | 39.4 |
| 465 | 13v-02-Hen—fe2c4—1852        | -3246.995023 | 39.4 |
| 466 | 13v-02-Hen—fe2c4—1668        | -3246.995012 | 39.5 |
| 467 | 13v-03-DitrapIcos—fe2c4—2717 | -3246.995005 | 39.5 |
| 468 | 13v-02-Hen—fe2c4—1931        | -3246.994783 | 39.6 |
| 469 | 13v-01-Doc—fe2c4—1079        | -3246.994502 | 39.8 |
| 470 | 13v-01-Doc—fe2c4—989         | -3246.994435 | 39.8 |
| 471 | 13v-03-DitrapIcos—fe2c4—2785 | -3246.994422 | 39.8 |
| 472 | 13v-01-Doc—fe2c4—975         | -3246.993989 | 40.1 |
| 473 | 13v-01-Doc—fe2c4—150         | -3246.993812 | 40.2 |
| 474 | 13v-03-DitrapIcos—fe2c4—2690 | -3246.993764 | 40.2 |
| 475 | 13v-01-Doc—fe2c4—1141        | -3246.993631 | 40.3 |
| 476 | 13v-03-DitrapIcos—fe2c4—2603 | -3246.993627 | 40.3 |
| 477 | 13v-01-Doc—fe2c4—888         | -3246.99354  | 40.4 |
| 478 | 13v-01-Doc—fe2c4—1007        | -3246.993517 | 40.4 |
| 479 | 13v-02-Hen—fe2c4—1372        | -3246.99338  | 40.5 |
| 480 | 13v-02-Hen—fe2c4—1426        | -3246.993375 | 40.5 |
| 481 | 13v-01-Doc—fe2c4—984         | -3246.993357 | 40.5 |
| 482 | 13v-02-Hen—fe2c4—1681        | -3246.993339 | 40.5 |
| 483 | 13v-03-DitrapIcos—fe2c4—2482 | -3246.993183 | 40.6 |
| 484 | 13v-01-Doc—fe2c4—312         | -3246.993107 | 40.6 |
| 485 | 13v-01-Doc—fe2c4—934         | -3246.993015 | 40.7 |
| 486 | 13v-03-DitrapIcos—fe2c4—2668 | -3246.992994 | 40.7 |
| 487 | 13v-03-DitrapIcos—fe2c4—2679 | -3246.992963 | 40.7 |
| 488 | 13v-02-Hen—fe2c4—1871        | -3246.992941 | 40.8 |
| 489 | 13v-01-Doc—fe2c4—718         | -3246.992907 | 40.8 |
| 490 | 13v-01-Doc—fe2c4—926         | -3246.992838 | 40.8 |
| 491 | 13v-04-CapHexAnPr—fe2c4—3440 | -3246.992805 | 40.8 |
| 492 | 13v-04-CapHexAnPr—fe2c4—3008 | -3246.992788 | 40.8 |
| 493 | 13v-01-Doc—fe2c4—471         | -3246.992566 | 41.0 |
| 494 | 13v-02-Hen—fe2c4—1969        | -3246.992444 | 41.1 |
| 495 | 13v-04-CapHexAnPr—fe2c4—2913 | -3246.992373 | 41.1 |
| 496 | 13v-04-CapHexAnPr—fe2c4—2954 | -3246.992357 | 41.1 |
| 497 | 13v-04-CapHexAnPr—fe2c4—3017 | -3246.992332 | 41.1 |
| 498 | 13v-01-Doc—fe2c4—997         | -3246.992315 | 41.1 |
| 499 | 13v-03-DitrapIcos—fe2c4—2633 | -3246.99224  | 41.2 |
| 500 | 13v-01-Doc—fe2c4—39          | -3246.99209  | 41.3 |
| 501 | 13v-01-Doc—fe2c4—860         | -3246.991981 | 41.4 |
| 502 | 13v-03-DitrapIcos—fe2c4—2821 | -3246.991956 | 41.4 |
| 503 | 13v-01-Doc—fe2c4—1263        | -3246.991926 | 41.4 |
| 504 | 13v-01-Doc—fe2c4—1257        | -3246.991813 | 41.5 |
| 505 | 13v-04-CapHexAnPr—fe2c4—2966 | -3246.991674 | 41.5 |
| 506 | 13v-03-DitrapIcos—fe2c4—2816 | -3246.991617 | 41.6 |
| 507 | 13v-01-Doc—fe2c4—714         | -3246.991576 | 41.6 |

|     |                              |              |      |
|-----|------------------------------|--------------|------|
| 508 | 13v-02-Hen—fe2c4—2066        | -3246.99153  | 41.6 |
| 509 | 13v-01-Doc—fe2c4—856         | -3246.991524 | 41.6 |
| 510 | 13v-03-DitrapIcos—fe2c4—2812 | -3246.991469 | 41.7 |
| 511 | 13v-02-Hen—fe2c4—1956        | -3246.991437 | 41.7 |
| 512 | 13v-01-Doc—fe2c4—172         | -3246.99142  | 41.7 |
| 513 | 13v-01-Doc—fe2c4—317         | -3246.991393 | 41.7 |
| 514 | 13v-02-Hen—fe2c4—1479        | -3246.991327 | 41.8 |
| 515 | 13v-02-Hen—fe2c4—1431        | -3246.991264 | 41.8 |
| 516 | 13v-03-DitrapIcos—fe2c4—2369 | -3246.991233 | 41.8 |
| 517 | 13v-01-Doc—fe2c4—956         | -3246.991186 | 41.9 |
| 518 | 13v-01-Doc—fe2c4—843         | -3246.991181 | 41.9 |
| 519 | 13v-02-Hen—fe2c4—1772        | -3246.991176 | 41.9 |
| 520 | 13v-01-Doc—fe2c4—680         | -3246.991168 | 41.9 |
| 521 | 13v-02-Hen—fe2c4—1866        | -3246.991132 | 41.9 |
| 522 | 13v-03-DitrapIcos—fe2c4—2678 | -3246.991077 | 41.9 |
| 523 | 13v-03-DitrapIcos—fe2c4—2770 | -3246.991037 | 41.9 |
| 524 | 13v-02-Hen—fe2c4—1383        | -3246.991004 | 42.0 |
| 525 | 13v-03-DitrapIcos—fe2c4—2624 | -3246.990997 | 42.0 |
| 526 | 13v-01-Doc—fe2c4—999         | -3246.990991 | 42.0 |
| 527 | 13v-01-Doc—fe2c4—262         | -3246.990943 | 42.0 |
| 528 | 13v-01-Doc—fe2c4—978         | -3246.990929 | 42.0 |
| 529 | 13v-01-Doc—fe2c4—901         | -3246.990899 | 42.0 |
| 530 | 13v-01-Doc—fe2c4—136         | -3246.990877 | 42.0 |
| 531 | 13v-01-Doc—fe2c4—183         | -3246.990868 | 42.1 |
| 532 | 13v-01-Doc—fe2c4—669         | -3246.990847 | 42.1 |
| 533 | 13v-02-Hen—fe2c4—1533        | -3246.990819 | 42.1 |
| 534 | 13v-02-Hen—fe2c4—1979        | -3246.990814 | 42.1 |
| 535 | 13v-01-Doc—fe2c4—381         | -3246.990808 | 42.1 |
| 536 | 13v-03-DitrapIcos—fe2c4—2197 | -3246.990775 | 42.1 |
| 537 | 13v-03-DitrapIcos—fe2c4—2596 | -3246.990756 | 42.1 |
| 538 | 13v-02-Hen—fe2c4—2036        | -3246.990731 | 42.1 |
| 539 | 13v-03-DitrapIcos—fe2c4—2248 | -3246.9907   | 42.2 |
| 540 | 13v-02-Hen—fe2c4—1834        | -3246.99064  | 42.2 |
| 541 | 13v-01-Doc—fe2c4—1227        | -3246.990597 | 42.2 |
| 542 | 13v-01-Doc—fe2c4—1196        | -3246.990572 | 42.2 |
| 543 | 13v-01-Doc—fe2c4—423         | -3246.990551 | 42.3 |
| 544 | 13v-01-Doc—fe2c4—1177        | -3246.990458 | 42.3 |
| 545 | 13v-02-Hen—fe2c4—1868        | -3246.990422 | 42.3 |
| 546 | 13v-03-DitrapIcos—fe2c4—2889 | -3246.990421 | 42.3 |
| 547 | 13v-03-DitrapIcos—fe2c4—2882 | -3246.990355 | 42.4 |
| 548 | 13v-01-Doc—fe2c4—830         | -3246.990301 | 42.4 |
| 549 | 13v-01-Doc—fe2c4—866         | -3246.99027  | 42.4 |
| 550 | 13v-01-Doc—fe2c4—469         | -3246.990268 | 42.4 |
| 551 | 13v-02-Hen—fe2c4—1563        | -3246.990172 | 42.5 |
| 552 | 13v-01-Doc—fe2c4—146         | -3246.990162 | 42.5 |
| 553 | 13v-01-Doc—fe2c4—1096        | -3246.990091 | 42.5 |
| 554 | 13v-02-Hen—fe2c4—2026        | -3246.990061 | 42.6 |
| 555 | 13v-01-Doc—fe2c4—267         | -3246.990007 | 42.6 |
| 556 | 13v-01-Doc—fe2c4—668         | -3246.989999 | 42.6 |
| 557 | 13v-02-Hen—fe2c4—2008        | -3246.989953 | 42.6 |
| 558 | 13v-02-Hen—fe2c4—1564        | -3246.989925 | 42.6 |

|     |                              |              |      |
|-----|------------------------------|--------------|------|
| 559 | 13v-01-Doc—fe2c4—703         | -3246.989885 | 42.7 |
| 560 | 13v-01-Doc—fe2c4—1086        | -3246.989816 | 42.7 |
| 561 | 13v-03-DitrapIcos—fe2c4—2402 | -3246.989773 | 42.7 |
| 562 | 13v-01-Doc—fe2c4—271         | -3246.989742 | 42.8 |
| 563 | 13v-01-Doc—fe2c4—191         | -3246.989732 | 42.8 |
| 564 | 13v-02-Hen—fe2c4—1559        | -3246.989727 | 42.8 |
| 565 | 13v-01-Doc—fe2c4—359         | -3246.989666 | 42.8 |
| 566 | 13v-03-DitrapIcos—fe2c4—2578 | -3246.989665 | 42.8 |
| 567 | 13v-02-Hen—fe2c4—1324        | -3246.989628 | 42.8 |
| 568 | 13v-01-Doc—fe2c4—676         | -3246.989618 | 42.8 |
| 569 | 13v-02-Hen—fe2c4—1439        | -3246.989608 | 42.8 |
| 570 | 13v-03-DitrapIcos—fe2c4—2486 | -3246.989558 | 42.9 |
| 571 | 13v-04-CapHexAnPr—fe2c4—3298 | -3246.989554 | 42.9 |
| 572 | 13v-02-Hen—fe2c4—1962        | -3246.989505 | 42.9 |
| 573 | 13v-02-Hen—fe2c4—1329        | -3246.989376 | 43.0 |
| 574 | 13v-03-DitrapIcos—fe2c4—2121 | -3246.98935  | 43.0 |
| 575 | 13v-01-Doc—fe2c4—652         | -3246.98929  | 43.0 |
| 576 | 13v-01-Doc—fe2c4—1084        | -3246.989279 | 43.0 |
| 577 | 13v-03-DitrapIcos—fe2c4—2276 | -3246.989262 | 43.1 |
| 578 | 13v-01-Doc—fe2c4—122         | -3246.98926  | 43.1 |
| 579 | 13v-03-DitrapIcos—fe2c4—2470 | -3246.989134 | 43.1 |
| 580 | 13v-04-CapHexAnPr—fe2c4—3500 | -3246.989103 | 43.2 |
| 581 | 13v-02-Hen—fe2c4—1529        | -3246.989038 | 43.2 |
| 582 | 13v-01-Doc—fe2c4—972         | -3246.988913 | 43.3 |
| 583 | 13v-03-DitrapIcos—fe2c4—2532 | -3246.988892 | 43.3 |
| 584 | 13v-01-Doc—fe2c4—823         | -3246.988853 | 43.3 |
| 585 | 13v-02-Hen—fe2c4—1912        | -3246.988809 | 43.3 |
| 586 | 13v-03-DitrapIcos—fe2c4—2877 | -3246.988752 | 43.4 |
| 587 | 13v-02-Hen—fe2c4—2001        | -3246.988719 | 43.4 |
| 588 | 13v-03-DitrapIcos—fe2c4—2716 | -3246.988712 | 43.4 |
| 589 | 13v-01-Doc—fe2c4—759         | -3246.988705 | 43.4 |
| 590 | 13v-01-Doc—fe2c4—1256        | -3246.988678 | 43.4 |
| 591 | 13v-01-Doc—fe2c4—323         | -3246.988657 | 43.4 |
| 592 | 13v-03-DitrapIcos—fe2c4—2663 | -3246.988638 | 43.5 |
| 593 | 13v-03-DitrapIcos—fe2c4—2594 | -3246.988629 | 43.5 |
| 594 | 13v-02-Hen—fe2c4—1924        | -3246.988624 | 43.5 |
| 595 | 13v-02-Hen—fe2c4—2063        | -3246.988542 | 43.5 |
| 596 | 13v-03-DitrapIcos—fe2c4—2884 | -3246.988528 | 43.5 |
| 597 | 13v-01-Doc—fe2c4—1056        | -3246.98851  | 43.5 |
| 598 | 13v-01-Doc—fe2c4—867         | -3246.988505 | 43.5 |
| 599 | 13v-02-Hen—fe2c4—1850        | -3246.988496 | 43.5 |
| 600 | 13v-02-Hen—fe2c4—1421        | -3246.988466 | 43.6 |
| 601 | 13v-01-Doc—fe2c4—1250        | -3246.988461 | 43.6 |
| 602 | 13v-01-Doc—fe2c4—713         | -3246.988442 | 43.6 |
| 603 | 13v-02-Hen—fe2c4—1949        | -3246.988429 | 43.6 |
| 604 | 13v-03-DitrapIcos—fe2c4—2182 | -3246.988365 | 43.6 |
| 605 | 13v-01-Doc—fe2c4—336         | -3246.988306 | 43.7 |
| 606 | 13v-02-Hen—fe2c4—1365        | -3246.988296 | 43.7 |
| 607 | 13v-02-Hen—fe2c4—1576        | -3246.988287 | 43.7 |
| 608 | 13v-01-Doc—fe2c4—710         | -3246.988278 | 43.7 |
| 609 | 13v-03-DitrapIcos—fe2c4—2866 | -3246.988223 | 43.7 |

|     |                              |              |      |
|-----|------------------------------|--------------|------|
| 610 | 13v-02-Hen—fe2c4—1855        | -3246.988162 | 43.8 |
| 611 | 13v-04-CapHexAnPr—fe2c4—3585 | -3246.988154 | 43.8 |
| 612 | 13v-01-Doc—fe2c4—966         | -3246.988136 | 43.8 |
| 613 | 13v-04-CapHexAnPr—fe2c4—3548 | -3246.988118 | 43.8 |
| 614 | 13v-01-Doc—fe2c4—927         | -3246.987998 | 43.9 |
| 615 | 13v-01-Doc—fe2c4—1271        | -3246.987964 | 43.9 |
| 616 | 13v-01-Doc—fe2c4—870         | -3246.987958 | 43.9 |
| 617 | 13v-02-Hen—fe2c4—1849        | -3246.987901 | 43.9 |
| 618 | 13v-03-DitrapIcos—fe2c4—2818 | -3246.987836 | 44.0 |
| 619 | 13v-01-Doc—fe2c4—318         | -3246.987755 | 44.0 |
| 620 | 13v-04-CapHexAnPr—fe2c4—3408 | -3246.98773  | 44.0 |
| 621 | 13v-01-Doc—fe2c4—945         | -3246.987713 | 44.0 |
| 622 | 13v-01-Doc—fe2c4—744         | -3246.987697 | 44.0 |
| 623 | 13v-04-CapHexAnPr—fe2c4—3576 | -3246.98767  | 44.1 |
| 624 | 13v-04-CapHexAnPr—fe2c4—2999 | -3246.987653 | 44.1 |
| 625 | 13v-04-CapHexAnPr—fe2c4—3466 | -3246.987575 | 44.1 |
| 626 | 13v-02-Hen—fe2c4—1341        | -3246.987553 | 44.1 |
| 627 | 13v-03-DitrapIcos—fe2c4—2676 | -3246.987545 | 44.1 |
| 628 | 13v-03-DitrapIcos—fe2c4—2675 | -3246.987535 | 44.1 |
| 629 | 13v-01-Doc—fe2c4—925         | -3246.987507 | 44.2 |
| 630 | 13v-01-Doc—fe2c4—820         | -3246.987483 | 44.2 |
| 631 | 13v-01-Doc—fe2c4—437         | -3246.987458 | 44.2 |
| 632 | 13v-01-Doc—fe2c4—729         | -3246.987413 | 44.2 |
| 633 | 13v-03-DitrapIcos—fe2c4—2673 | -3246.987406 | 44.2 |
| 634 | 13v-02-Hen—fe2c4—1474        | -3246.987393 | 44.2 |
| 635 | 13v-01-Doc—fe2c4—325         | -3246.98735  | 44.3 |
| 636 | 13v-01-Doc—fe2c4—939         | -3246.987349 | 44.3 |
| 637 | 13v-02-Hen—fe2c4—1942        | -3246.987311 | 44.3 |
| 638 | 13v-01-Doc—fe2c4—957         | -3246.987287 | 44.3 |
| 639 | 13v-01-Doc—fe2c4—930         | -3246.987269 | 44.3 |
| 640 | 13v-01-Doc—fe2c4—950         | -3246.987254 | 44.3 |
| 641 | 13v-02-Hen—fe2c4—1352        | -3246.987213 | 44.3 |
| 642 | 13v-01-Doc—fe2c4—1095        | -3246.987203 | 44.4 |
| 643 | 13v-03-DitrapIcos—fe2c4—2861 | -3246.98719  | 44.4 |
| 644 | 13v-02-Hen—fe2c4—1851        | -3246.987149 | 44.4 |
| 645 | 13v-02-Hen—fe2c4—1874        | -3246.987118 | 44.4 |
| 646 | 13v-03-DitrapIcos—fe2c4—2667 | -3246.987118 | 44.4 |
| 647 | 13v-01-Doc—fe2c4—853         | -3246.987116 | 44.4 |
| 648 | 13v-01-Doc—fe2c4—915         | -3246.987094 | 44.4 |
| 649 | 13v-02-Hen—fe2c4—1312        | -3246.98709  | 44.4 |
| 650 | 13v-01-Doc—fe2c4—232         | -3246.987025 | 44.5 |
| 651 | 13v-02-Hen—fe2c4—1422        | -3246.986993 | 44.5 |
| 652 | 13v-01-Doc—fe2c4—103         | -3246.986961 | 44.5 |
| 653 | 13v-03-DitrapIcos—fe2c4—2586 | -3246.986867 | 44.6 |
| 654 | 13v-04-CapHexAnPr—fe2c4—3157 | -3246.986861 | 44.6 |
| 655 | 13v-01-Doc—fe2c4—1295        | -3246.986739 | 44.6 |
| 656 | 13v-03-DitrapIcos—fe2c4—2666 | -3246.986739 | 44.6 |
| 657 | 13v-01-Doc—fe2c4—557         | -3246.986587 | 44.7 |
| 658 | 13v-02-Hen—fe2c4—1510        | -3246.986523 | 44.8 |
| 659 | 13v-01-Doc—fe2c4—771         | -3246.986492 | 44.8 |
| 660 | 13v-01-Doc—fe2c4—477         | -3246.986486 | 44.8 |

|     |                               |              |      |
|-----|-------------------------------|--------------|------|
| 661 | 13v-03-DitrapIcos—fe2c4—-2452 | -3246.986484 | 44.8 |
| 662 | 13v-01-Doc—fe2c4—-1274        | -3246.986439 | 44.8 |
| 663 | 13v-03-DitrapIcos—fe2c4—-2298 | -3246.986286 | 44.9 |
| 664 | 13v-01-Doc—fe2c4—-908         | -3246.986272 | 44.9 |
| 665 | 13v-02-Hen—fe2c4—-1981        | -3246.986232 | 45.0 |
| 666 | 13v-03-DitrapIcos—fe2c4—-2681 | -3246.986215 | 45.0 |
| 667 | 13v-02-Hen—fe2c4—-1951        | -3246.98619  | 45.0 |
| 668 | 13v-01-Doc—fe2c4—-511         | -3246.986135 | 45.0 |
| 669 | 13v-01-Doc—fe2c4—-292         | -3246.98613  | 45.0 |
| 670 | 13v-01-Doc—fe2c4—-297         | -3246.986073 | 45.1 |
| 671 | 13v-02-Hen—fe2c4—-1694        | -3246.985961 | 45.1 |
| 672 | 13v-02-Hen—fe2c4—-1543        | -3246.985955 | 45.1 |
| 673 | 13v-03-DitrapIcos—fe2c4—-2207 | -3246.985954 | 45.1 |
| 674 | 13v-04-CapHexAnPr—fe2c4—-3376 | -3246.985927 | 45.2 |
| 675 | 13v-01-Doc—fe2c4—-1035        | -3246.985921 | 45.2 |
| 676 | 13v-03-DitrapIcos—fe2c4—-2719 | -3246.98589  | 45.2 |
| 677 | 13v-03-DitrapIcos—fe2c4—-2783 | -3246.985886 | 45.2 |
| 678 | 13v-01-Doc—fe2c4—-405         | -3246.985771 | 45.3 |
| 679 | 13v-01-Doc—fe2c4—-880         | -3246.985738 | 45.3 |
| 680 | 13v-01-Doc—fe2c4—-8           | -3246.985666 | 45.3 |
| 681 | 13v-02-Hen—fe2c4—-1440        | -3246.985656 | 45.3 |
| 682 | 13v-01-Doc—fe2c4—-452         | -3246.985636 | 45.3 |
| 683 | 13v-01-Doc—fe2c4—-686         | -3246.985534 | 45.4 |
| 684 | 13v-01-Doc—fe2c4—-1100        | -3246.985476 | 45.4 |
| 685 | 13v-01-Doc—fe2c4—-1158        | -3246.985362 | 45.5 |
| 686 | 13v-01-Doc—fe2c4—-1078        | -3246.985321 | 45.5 |
| 687 | 13v-03-DitrapIcos—fe2c4—-2577 | -3246.985306 | 45.5 |
| 688 | 13v-03-DitrapIcos—fe2c4—-2159 | -3246.985275 | 45.6 |
| 689 | 13v-03-DitrapIcos—fe2c4—-2510 | -3246.985239 | 45.6 |
| 690 | 13v-01-Doc—fe2c4—-1232        | -3246.985175 | 45.6 |
| 691 | 13v-02-Hen—fe2c4—-1627        | -3246.985155 | 45.6 |
| 692 | 13v-03-DitrapIcos—fe2c4—-2600 | -3246.985137 | 45.6 |
| 693 | 13v-01-Doc—fe2c4—-918         | -3246.985089 | 45.7 |
| 694 | 13v-02-Hen—fe2c4—-1939        | -3246.985043 | 45.7 |
| 695 | 13v-01-Doc—fe2c4—-855         | -3246.98499  | 45.7 |
| 696 | 13v-01-Doc—fe2c4—-1192        | -3246.984958 | 45.8 |
| 697 | 13v-01-Doc—fe2c4—-654         | -3246.984927 | 45.8 |
| 698 | 13v-01-Doc—fe2c4—-1097        | -3246.984839 | 45.8 |
| 699 | 13v-01-Doc—fe2c4—-825         | -3246.984806 | 45.9 |
| 700 | 13v-02-Hen—fe2c4—-1929        | -3246.984794 | 45.9 |
| 701 | 13v-01-Doc—fe2c4—-1083        | -3246.984758 | 45.9 |
| 702 | 13v-01-Doc—fe2c4—-345         | -3246.98475  | 45.9 |
| 703 | 13v-02-Hen—fe2c4—-1740        | -3246.98474  | 45.9 |
| 704 | 13v-02-Hen—fe2c4—-1569        | -3246.984714 | 45.9 |
| 705 | 13v-02-Hen—fe2c4—-1523        | -3246.984658 | 45.9 |
| 706 | 13v-03-DitrapIcos—fe2c4—-2336 | -3246.984625 | 46.0 |
| 707 | 13v-01-Doc—fe2c4—-878         | -3246.984624 | 46.0 |
| 708 | 13v-03-DitrapIcos—fe2c4—-2545 | -3246.984581 | 46.0 |
| 709 | 13v-02-Hen—fe2c4—-1894        | -3246.984526 | 46.0 |
| 710 | 13v-01-Doc—fe2c4—-903         | -3246.984523 | 46.0 |
| 711 | 13v-01-Doc—fe2c4—-700         | -3246.9845   | 46.0 |

|     |                               |              |      |
|-----|-------------------------------|--------------|------|
| 712 | 13v-03-DitrapIcos—fe2c4—-2212 | -3246.984452 | 46.1 |
| 713 | 13v-01-Doc—fe2c4—-1053        | -3246.984388 | 46.1 |
| 714 | 13v-02-Hen—fe2c4—-2002        | -3246.984323 | 46.2 |
| 715 | 13v-01-Doc—fe2c4—-630         | -3246.984306 | 46.2 |
| 716 | 13v-01-Doc—fe2c4—-545         | -3246.984184 | 46.2 |
| 717 | 13v-01-Doc—fe2c4—-607         | -3246.984067 | 46.3 |
| 718 | 13v-02-Hen—fe2c4—-1887        | -3246.984045 | 46.3 |
| 719 | 13v-01-Doc—fe2c4—-779         | -3246.983987 | 46.4 |
| 720 | 13v-01-Doc—fe2c4—-320         | -3246.983913 | 46.4 |
| 721 | 13v-02-Hen—fe2c4—-1373        | -3246.983906 | 46.4 |
| 722 | 13v-03-DitrapIcos—fe2c4—-2229 | -3246.983878 | 46.4 |
| 723 | 13v-01-Doc—fe2c4—-302         | -3246.983821 | 46.5 |
| 724 | 13v-03-DitrapIcos—fe2c4—-2204 | -3246.983779 | 46.5 |
| 725 | 13v-03-DitrapIcos—fe2c4—-2436 | -3246.983768 | 46.5 |
| 726 | 13v-03-DitrapIcos—fe2c4—-2433 | -3246.983742 | 46.5 |
| 727 | 13v-02-Hen—fe2c4—-1416        | -3246.98373  | 46.5 |
| 728 | 13v-03-DitrapIcos—fe2c4—-2638 | -3246.983719 | 46.5 |
| 729 | 13v-02-Hen—fe2c4—-1940        | -3246.983684 | 46.6 |
| 730 | 13v-03-DitrapIcos—fe2c4—-2342 | -3246.983676 | 46.6 |
| 731 | 13v-02-Hen—fe2c4—-1785        | -3246.98366  | 46.6 |
| 732 | 13v-01-Doc—fe2c4—-313         | -3246.983624 | 46.6 |
| 733 | 13v-01-Doc—fe2c4—-785         | -3246.98359  | 46.6 |
| 734 | 13v-03-DitrapIcos—fe2c4—-2213 | -3246.983587 | 46.6 |
| 735 | 13v-02-Hen—fe2c4—-1534        | -3246.983532 | 46.7 |
| 736 | 13v-01-Doc—fe2c4—-638         | -3246.983456 | 46.7 |
| 737 | 13v-01-Doc—fe2c4—-1150        | -3246.983239 | 46.8 |
| 738 | 13v-02-Hen—fe2c4—-1902        | -3246.983234 | 46.8 |
| 739 | 13v-02-Hen—fe2c4—-1938        | -3246.983201 | 46.9 |
| 740 | 13v-03-DitrapIcos—fe2c4—-2201 | -3246.983159 | 46.9 |
| 741 | 13v-01-Doc—fe2c4—-291         | -3246.983158 | 46.9 |
| 742 | 13v-01-Doc—fe2c4—-776         | -3246.983122 | 46.9 |
| 743 | 13v-01-Doc—fe2c4—-294         | -3246.983105 | 46.9 |
| 744 | 13v-01-Doc—fe2c4—-641         | -3246.983103 | 46.9 |
| 745 | 13v-03-DitrapIcos—fe2c4—-2262 | -3246.983039 | 47.0 |
| 746 | 13v-01-Doc—fe2c4—-648         | -3246.983037 | 47.0 |
| 747 | 13v-01-Doc—fe2c4—-128         | -3246.983027 | 47.0 |
| 748 | 13v-01-Doc—fe2c4—-780         | -3246.982941 | 47.0 |
| 749 | 13v-01-Doc—fe2c4—-917         | -3246.98292  | 47.0 |
| 750 | 13v-01-Doc—fe2c4—-134         | -3246.982916 | 47.0 |
| 751 | 13v-03-DitrapIcos—fe2c4—-2836 | -3246.982911 | 47.0 |
| 752 | 13v-02-Hen—fe2c4—-1544        | -3246.982811 | 47.1 |
| 753 | 13v-04-CapHexAnPr—fe2c4—-3465 | -3246.982767 | 47.1 |
| 754 | 13v-03-DitrapIcos—fe2c4—-2844 | -3246.982755 | 47.1 |
| 755 | 13v-02-Hen—fe2c4—-1500        | -3246.982684 | 47.2 |
| 756 | 13v-03-DitrapIcos—fe2c4—-2782 | -3246.982651 | 47.2 |
| 757 | 13v-01-Doc—fe2c4—-875         | -3246.98262  | 47.2 |
| 758 | 13v-03-DitrapIcos—fe2c4—-2131 | -3246.982605 | 47.2 |
| 759 | 13v-01-Doc—fe2c4—-1280        | -3246.982596 | 47.2 |
| 760 | 13v-01-Doc—fe2c4—-1025        | -3246.982403 | 47.4 |
| 761 | 13v-02-Hen—fe2c4—-2057        | -3246.982392 | 47.4 |
| 762 | 13v-01-Doc—fe2c4—-773         | -3246.982369 | 47.4 |

|     |                              |              |      |
|-----|------------------------------|--------------|------|
| 763 | 13v-01-Doc—fe2c4—673         | -3246.982363 | 47.4 |
| 764 | 13v-01-Doc—fe2c4—1125        | -3246.982359 | 47.4 |
| 765 | 13v-01-Doc—fe2c4—937         | -3246.982302 | 47.4 |
| 766 | 13v-02-Hen—fe2c4—1995        | -3246.982295 | 47.4 |
| 767 | 13v-01-Doc—fe2c4—1017        | -3246.982199 | 47.5 |
| 768 | 13v-01-Doc—fe2c4—436         | -3246.982193 | 47.5 |
| 769 | 13v-03-DitrapIcos—fe2c4—2651 | -3246.982116 | 47.5 |
| 770 | 13v-03-DitrapIcos—fe2c4—2734 | -3246.982106 | 47.6 |
| 771 | 13v-01-Doc—fe2c4—1224        | -3246.982077 | 47.6 |
| 772 | 13v-03-DitrapIcos—fe2c4—2621 | -3246.982041 | 47.6 |
| 773 | 13v-03-DitrapIcos—fe2c4—2521 | -3246.982038 | 47.6 |
| 774 | 13v-01-Doc—fe2c4—1248        | -3246.982034 | 47.6 |
| 775 | 13v-01-Doc—fe2c4—551         | -3246.981987 | 47.6 |
| 776 | 13v-01-Doc—fe2c4—162         | -3246.981977 | 47.6 |
| 777 | 13v-03-DitrapIcos—fe2c4—2234 | -3246.981969 | 47.6 |
| 778 | 13v-01-Doc—fe2c4—724         | -3246.981955 | 47.6 |
| 779 | 13v-03-DitrapIcos—fe2c4—2423 | -3246.981954 | 47.6 |
| 780 | 13v-02-Hen—fe2c4—1789        | -3246.981935 | 47.7 |
| 781 | 13v-02-Hen—fe2c4—1491        | -3246.981914 | 47.7 |
| 782 | 13v-01-Doc—fe2c4—328         | -3246.981846 | 47.7 |
| 783 | 13v-01-Doc—fe2c4—269         | -3246.981819 | 47.7 |
| 784 | 13v-01-Doc—fe2c4—897         | -3246.981803 | 47.7 |
| 785 | 13v-03-DitrapIcos—fe2c4—2222 | -3246.981762 | 47.8 |
| 786 | 13v-01-Doc—fe2c4—666         | -3246.981731 | 47.8 |
| 787 | 13v-03-DitrapIcos—fe2c4—2176 | -3246.981712 | 47.8 |
| 788 | 13v-01-Doc—fe2c4—954         | -3246.98168  | 47.8 |
| 789 | 13v-02-Hen—fe2c4—1883        | -3246.981675 | 47.8 |
| 790 | 13v-02-Hen—fe2c4—2015        | -3246.981636 | 47.8 |
| 791 | 13v-02-Hen—fe2c4—1438        | -3246.981614 | 47.9 |
| 792 | 13v-02-Hen—fe2c4—1865        | -3246.981596 | 47.9 |
| 793 | 13v-03-DitrapIcos—fe2c4—2322 | -3246.981565 | 47.9 |
| 794 | 13v-02-Hen—fe2c4—1863        | -3246.981563 | 47.9 |
| 795 | 13v-03-DitrapIcos—fe2c4—2873 | -3246.981563 | 47.9 |
| 796 | 13v-02-Hen—fe2c4—1823        | -3246.981485 | 47.9 |
| 797 | 13v-03-DitrapIcos—fe2c4—2799 | -3246.981432 | 48.0 |
| 798 | 13v-02-Hen—fe2c4—1793        | -3246.981417 | 48.0 |
| 799 | 13v-01-Doc—fe2c4—326         | -3246.981293 | 48.1 |
| 800 | 13v-03-DitrapIcos—fe2c4—2480 | -3246.981288 | 48.1 |
| 801 | 13v-02-Hen—fe2c4—1437        | -3246.981287 | 48.1 |
| 802 | 13v-01-Doc—fe2c4—388         | -3246.981279 | 48.1 |
| 803 | 13v-03-DitrapIcos—fe2c4—2607 | -3246.981201 | 48.1 |
| 804 | 13v-04-CapHexAnPr—fe2c4—3000 | -3246.981192 | 48.1 |
| 805 | 13v-01-Doc—fe2c4—1104        | -3246.98118  | 48.1 |
| 806 | 13v-01-Doc—fe2c4—578         | -3246.981149 | 48.2 |
| 807 | 13v-03-DitrapIcos—fe2c4—2806 | -3246.981117 | 48.2 |
| 808 | 13v-02-Hen—fe2c4—1471        | -3246.981054 | 48.2 |
| 809 | 13v-01-Doc—fe2c4—144         | -3246.981028 | 48.2 |
| 810 | 13v-01-Doc—fe2c4—1135        | -3246.980916 | 48.3 |
| 811 | 13v-04-CapHexAnPr—fe2c4—2958 | -3246.980865 | 48.3 |
| 812 | 13v-01-Doc—fe2c4—1099        | -3246.980849 | 48.3 |
| 813 | 13v-02-Hen—fe2c4—2042        | -3246.980728 | 48.4 |

|     |                                |              |      |
|-----|--------------------------------|--------------|------|
| 814 | 13v-02-Hen--fe2c4--1733        | -3246.980724 | 48.4 |
| 815 | 13v-02-Hen--fe2c4--1821        | -3246.980708 | 48.4 |
| 816 | 13v-02-Hen--fe2c4--1904        | -3246.980654 | 48.5 |
| 817 | 13v-02-Hen--fe2c4--1794        | -3246.980638 | 48.5 |
| 818 | 13v-04-CapHexAnPr--fe2c4--3216 | -3246.980623 | 48.5 |
| 819 | 13v-02-Hen--fe2c4--1637        | -3246.980597 | 48.5 |
| 820 | 13v-02-Hen--fe2c4--2020        | -3246.980578 | 48.5 |
| 821 | 13v-03-DitrapIcos--fe2c4--2324 | -3246.980564 | 48.5 |
| 822 | 13v-02-Hen--fe2c4--1891        | -3246.98054  | 48.5 |
| 823 | 13v-01-Doc--fe2c4--1046        | -3246.980483 | 48.6 |
| 824 | 13v-02-Hen--fe2c4--1643        | -3246.98048  | 48.6 |
| 825 | 13v-02-Hen--fe2c4--1628        | -3246.980468 | 48.6 |
| 826 | 13v-01-Doc--fe2c4--699         | -3246.980389 | 48.6 |
| 827 | 13v-03-DitrapIcos--fe2c4--2817 | -3246.980296 | 48.7 |
| 828 | 13v-04-CapHexAnPr--fe2c4--3156 | -3246.980253 | 48.7 |
| 829 | 13v-03-DitrapIcos--fe2c4--2631 | -3246.980225 | 48.7 |
| 830 | 13v-04-CapHexAnPr--fe2c4--3355 | -3246.980207 | 48.7 |
| 831 | 13v-03-DitrapIcos--fe2c4--2515 | -3246.980182 | 48.8 |
| 832 | 13v-02-Hen--fe2c4--1357        | -3246.980171 | 48.8 |
| 833 | 13v-01-Doc--fe2c4--1037        | -3246.980133 | 48.8 |
| 834 | 13v-01-Doc--fe2c4--1009        | -3246.980114 | 48.8 |
| 835 | 13v-04-CapHexAnPr--fe2c4--3335 | -3246.980035 | 48.8 |
| 836 | 13v-01-Doc--fe2c4--985         | -3246.979955 | 48.9 |
| 837 | 13v-03-DitrapIcos--fe2c4--2802 | -3246.979926 | 48.9 |
| 838 | 13v-01-Doc--fe2c4--736         | -3246.979901 | 48.9 |
| 839 | 13v-02-Hen--fe2c4--1917        | -3246.979899 | 48.9 |
| 840 | 13v-01-Doc--fe2c4--1108        | -3246.979854 | 49.0 |
| 841 | 13v-01-Doc--fe2c4--837         | -3246.979846 | 49.0 |
| 842 | 13v-01-Doc--fe2c4--156         | -3246.979776 | 49.0 |
| 843 | 13v-02-Hen--fe2c4--1723        | -3246.979759 | 49.0 |
| 844 | 13v-02-Hen--fe2c4--1556        | -3246.979655 | 49.1 |
| 845 | 13v-02-Hen--fe2c4--1878        | -3246.97964  | 49.1 |
| 846 | 13v-01-Doc--fe2c4--1178        | -3246.979582 | 49.1 |
| 847 | 13v-04-CapHexAnPr--fe2c4--2956 | -3246.979557 | 49.1 |
| 848 | 13v-02-Hen--fe2c4--1722        | -3246.979555 | 49.2 |
| 849 | 13v-02-Hen--fe2c4--1791        | -3246.979534 | 49.2 |
| 850 | 13v-01-Doc--fe2c4--418         | -3246.979459 | 49.2 |
| 851 | 13v-01-Doc--fe2c4--761         | -3246.979391 | 49.3 |
| 852 | 13v-02-Hen--fe2c4--1475        | -3246.979384 | 49.3 |
| 853 | 13v-02-Hen--fe2c4--1434        | -3246.979307 | 49.3 |
| 854 | 13v-03-DitrapIcos--fe2c4--2139 | -3246.97927  | 49.3 |
| 855 | 13v-03-DitrapIcos--fe2c4--2343 | -3246.979235 | 49.4 |
| 856 | 13v-01-Doc--fe2c4--768         | -3246.9792   | 49.4 |
| 857 | 13v-04-CapHexAnPr--fe2c4--3360 | -3246.979144 | 49.4 |
| 858 | 13v-02-Hen--fe2c4--1973        | -3246.978995 | 49.5 |
| 859 | 13v-03-DitrapIcos--fe2c4--2589 | -3246.978793 | 49.6 |
| 860 | 13v-01-Doc--fe2c4--911         | -3246.978506 | 49.8 |
| 861 | 13v-02-Hen--fe2c4--1630        | -3246.978476 | 49.8 |
| 862 | 13v-02-Hen--fe2c4--1570        | -3246.978446 | 49.8 |
| 863 | 13v-03-DitrapIcos--fe2c4--2390 | -3246.978415 | 49.9 |
| 864 | 13v-01-Doc--fe2c4--1213        | -3246.978391 | 49.9 |



|     |                              |              |      |
|-----|------------------------------|--------------|------|
| 865 | 13v-01-Doc—fe2c4—438         | -3246.97838  | 49.9 |
| 866 | 13v-01-Doc—fe2c4—555         | -3246.978333 | 49.9 |
| 867 | 13v-03-DitrapIcos—fe2c4—2255 | -3246.978322 | 49.9 |
| 868 | 13v-01-Doc—fe2c4—1131        | -3246.978269 | 50.0 |
| 869 | 13v-01-Doc—fe2c4—881         | -3246.978206 | 50.0 |
| 870 | 13v-03-DitrapIcos—fe2c4—2701 | -3246.978194 | 50.0 |
| 871 | 13v-01-Doc—fe2c4—380         | -3246.978164 | 50.0 |
| 872 | 13v-02-Hen—fe2c4—1412        | -3246.978094 | 50.1 |
| 873 | 13v-03-DitrapIcos—fe2c4—2439 | -3246.978017 | 50.1 |
| 874 | 13v-01-Doc—fe2c4—912         | -3246.977909 | 50.2 |
| 875 | 13v-03-DitrapIcos—fe2c4—2453 | -3246.977844 | 50.2 |
| 876 | 13v-01-Doc—fe2c4—468         | -3246.977837 | 50.2 |
| 877 | 13v-02-Hen—fe2c4—1655        | -3246.977769 | 50.3 |
| 878 | 13v-01-Doc—fe2c4—687         | -3246.977653 | 50.3 |
| 879 | 13v-02-Hen—fe2c4—1986        | -3246.977646 | 50.3 |
| 880 | 13v-01-Doc—fe2c4—1154        | -3246.977613 | 50.4 |
| 881 | 13v-03-DitrapIcos—fe2c4—2231 | -3246.977595 | 50.4 |
| 882 | 13v-03-DitrapIcos—fe2c4—2773 | -3246.977456 | 50.5 |
| 883 | 13v-01-Doc—fe2c4—987         | -3246.977409 | 50.5 |
| 884 | 13v-01-Doc—fe2c4—1106        | -3246.977403 | 50.5 |
| 885 | 13v-03-DitrapIcos—fe2c4—2428 | -3246.977336 | 50.5 |
| 886 | 13v-04-CapHexAnPr—fe2c4—3320 | -3246.977301 | 50.6 |
| 887 | 13v-01-Doc—fe2c4—354         | -3246.977287 | 50.6 |
| 888 | 13v-01-Doc—fe2c4—352         | -3246.977206 | 50.6 |
| 889 | 13v-03-DitrapIcos—fe2c4—2513 | -3246.977133 | 50.7 |
| 890 | 13v-01-Doc—fe2c4—1126        | -3246.976933 | 50.8 |
| 891 | 13v-02-Hen—fe2c4—1418        | -3246.976887 | 50.8 |
| 892 | 13v-01-Doc—fe2c4—1088        | -3246.976828 | 50.9 |
| 893 | 13v-02-Hen—fe2c4—1992        | -3246.976776 | 50.9 |
| 894 | 13v-02-Hen—fe2c4—1695        | -3246.976763 | 50.9 |
| 895 | 13v-03-DitrapIcos—fe2c4—2493 | -3246.976751 | 50.9 |
| 896 | 13v-01-Doc—fe2c4—1005        | -3246.976735 | 50.9 |
| 897 | 13v-01-Doc—fe2c4—351         | -3246.976638 | 51.0 |
| 898 | 13v-01-Doc—fe2c4—1205        | -3246.976627 | 51.0 |
| 899 | 13v-03-DitrapIcos—fe2c4—2720 | -3246.976611 | 51.0 |
| 900 | 13v-01-Doc—fe2c4—133         | -3246.976576 | 51.0 |
| 901 | 13v-01-Doc—fe2c4—1202        | -3246.976571 | 51.0 |
| 902 | 13v-02-Hen—fe2c4—1355        | -3246.976562 | 51.0 |
| 903 | 13v-02-Hen—fe2c4—1429        | -3246.976515 | 51.1 |
| 904 | 13v-03-DitrapIcos—fe2c4—2472 | -3246.976497 | 51.1 |
| 905 | 13v-04-CapHexAnPr—fe2c4—3461 | -3246.976426 | 51.1 |
| 906 | 13v-01-Doc—fe2c4—562         | -3246.976423 | 51.1 |
| 907 | 13v-02-Hen—fe2c4—1676        | -3246.976416 | 51.1 |
| 908 | 13v-03-DitrapIcos—fe2c4—2250 | -3246.976415 | 51.1 |
| 909 | 13v-02-Hen—fe2c4—1719        | -3246.976413 | 51.1 |
| 910 | 13v-03-DitrapIcos—fe2c4—2534 | -3246.976413 | 51.1 |
| 911 | 13v-01-Doc—fe2c4—1094        | -3246.976391 | 51.1 |
| 912 | 13v-04-CapHexAnPr—fe2c4—3445 | -3246.976347 | 51.2 |
| 913 | 13v-01-Doc—fe2c4—821         | -3246.976335 | 51.2 |
| 914 | 13v-01-Doc—fe2c4—691         | -3246.976304 | 51.2 |
| 915 | 13v-02-Hen—fe2c4—1807        | -3246.976265 | 51.2 |

|     |                              |              |      |
|-----|------------------------------|--------------|------|
| 916 | 13v-01-Doc—fe2c4—859         | -3246.976259 | 51.2 |
| 917 | 13v-01-Doc—fe2c4—1014        | -3246.976209 | 51.3 |
| 918 | 13v-03-DitrapIcos—fe2c4—2514 | -3246.976197 | 51.3 |
| 919 | 13v-02-Hen—fe2c4—1806        | -3246.976196 | 51.3 |
| 920 | 13v-02-Hen—fe2c4—1537        | -3246.976183 | 51.3 |
| 921 | 13v-03-DitrapIcos—fe2c4—2530 | -3246.97618  | 51.3 |
| 922 | 13v-02-Hen—fe2c4—1558        | -3246.976159 | 51.3 |
| 923 | 13v-01-Doc—fe2c4—1018        | -3246.976132 | 51.3 |
| 924 | 13v-04-CapHexAnPr—fe2c4—2994 | -3246.976125 | 51.3 |
| 925 | 13v-01-Doc—fe2c4—1190        | -3246.976122 | 51.3 |
| 926 | 13v-02-Hen—fe2c4—1998        | -3246.976109 | 51.3 |
| 927 | 13v-02-Hen—fe2c4—1952        | -3246.97608  | 51.3 |
| 928 | 13v-01-Doc—fe2c4—653         | -3246.97605  | 51.4 |
| 929 | 13v-01-Doc—fe2c4—632         | -3246.976036 | 51.4 |
| 930 | 13v-02-Hen—fe2c4—1736        | -3246.976008 | 51.4 |
| 931 | 13v-03-DitrapIcos—fe2c4—2544 | -3246.975972 | 51.4 |
| 932 | 13v-01-Doc—fe2c4—819         | -3246.975946 | 51.4 |
| 933 | 13v-01-Doc—fe2c4—296         | -3246.975941 | 51.4 |
| 934 | 13v-01-Doc—fe2c4—1016        | -3246.97593  | 51.4 |
| 935 | 13v-04-CapHexAnPr—fe2c4—3499 | -3246.975927 | 51.4 |
| 936 | 13v-03-DitrapIcos—fe2c4—2525 | -3246.975873 | 51.5 |
| 937 | 13v-03-DitrapIcos—fe2c4—2605 | -3246.975851 | 51.5 |
| 938 | 13v-01-Doc—fe2c4—1036        | -3246.975825 | 51.5 |
| 939 | 13v-02-Hen—fe2c4—1320        | -3246.975702 | 51.6 |
| 940 | 13v-03-DitrapIcos—fe2c4—2109 | -3246.975693 | 51.6 |
| 941 | 13v-01-Doc—fe2c4—435         | -3246.975638 | 51.6 |
| 942 | 13v-02-Hen—fe2c4—1530        | -3246.97561  | 51.6 |
| 943 | 13v-02-Hen—fe2c4—1747        | -3246.975593 | 51.6 |
| 944 | 13v-01-Doc—fe2c4—1193        | -3246.975581 | 51.6 |
| 945 | 13v-01-Doc—fe2c4—431         | -3246.975569 | 51.7 |
| 946 | 13v-01-Doc—fe2c4—633         | -3246.975514 | 51.7 |
| 947 | 13v-01-Doc—fe2c4—716         | -3246.975477 | 51.7 |
| 948 | 13v-03-DitrapIcos—fe2c4—2093 | -3246.975416 | 51.7 |
| 949 | 13v-03-DitrapIcos—fe2c4—2097 | -3246.975416 | 51.7 |
| 950 | 13v-02-Hen—fe2c4—1699        | -3246.975259 | 51.8 |
| 951 | 13v-03-DitrapIcos—fe2c4—2591 | -3246.975247 | 51.9 |
| 952 | 13v-02-Hen—fe2c4—1642        | -3246.975204 | 51.9 |
| 953 | 13v-02-Hen—fe2c4—2000        | -3246.975194 | 51.9 |
| 954 | 13v-01-Doc—fe2c4—634         | -3246.974987 | 52.0 |
| 955 | 13v-01-Doc—fe2c4—851         | -3246.974981 | 52.0 |
| 956 | 13v-02-Hen—fe2c4—1782        | -3246.974976 | 52.0 |
| 957 | 13v-01-Doc—fe2c4—1155        | -3246.974941 | 52.0 |
| 958 | 13v-01-Doc—fe2c4—674         | -3246.974927 | 52.1 |
| 959 | 13v-03-DitrapIcos—fe2c4—2531 | -3246.97491  | 52.1 |
| 960 | 13v-03-DitrapIcos—fe2c4—2502 | -3246.974901 | 52.1 |
| 961 | 13v-01-Doc—fe2c4—1278        | -3246.974893 | 52.1 |
| 962 | 13v-02-Hen—fe2c4—1993        | -3246.974886 | 52.1 |
| 963 | 13v-03-DitrapIcos—fe2c4—2284 | -3246.974725 | 52.2 |
| 964 | 13v-02-Hen—fe2c4—1999        | -3246.974719 | 52.2 |
| 965 | 13v-01-Doc—fe2c4—427         | -3246.974693 | 52.2 |
| 966 | 13v-01-Doc—fe2c4—727         | -3246.974676 | 52.2 |

|      |                              |              |      |
|------|------------------------------|--------------|------|
| 967  | 13v-01-Doc—fe2c4—846         | -3246.974601 | 52.3 |
| 968  | 13v-01-Doc—fe2c4—1002        | -3246.974582 | 52.3 |
| 969  | 13v-01-Doc—fe2c4—1105        | -3246.974573 | 52.3 |
| 970  | 13v-01-Doc—fe2c4—940         | -3246.974567 | 52.3 |
| 971  | 13v-02-Hen—fe2c4—1618        | -3246.974553 | 52.3 |
| 972  | 13v-02-Hen—fe2c4—1331        | -3246.974505 | 52.3 |
| 973  | 13v-01-Doc—fe2c4—310         | -3246.974504 | 52.3 |
| 974  | 13v-02-Hen—fe2c4—2034        | -3246.974444 | 52.4 |
| 975  | 13v-01-Doc—fe2c4—1275        | -3246.974437 | 52.4 |
| 976  | 13v-03-DitrapIcos—fe2c4—2592 | -3246.974415 | 52.4 |
| 977  | 13v-02-Hen—fe2c4—1703        | -3246.974393 | 52.4 |
| 978  | 13v-01-Doc—fe2c4—1142        | -3246.974381 | 52.4 |
| 979  | 13v-03-DitrapIcos—fe2c4—2316 | -3246.974336 | 52.4 |
| 980  | 13v-01-Doc—fe2c4—1149        | -3246.974329 | 52.4 |
| 981  | 13v-01-Doc—fe2c4—647         | -3246.974323 | 52.4 |
| 982  | 13v-02-Hen—fe2c4—1811        | -3246.974256 | 52.5 |
| 983  | 13v-01-Doc—fe2c4—353         | -3246.97423  | 52.5 |
| 984  | 13v-02-Hen—fe2c4—1918        | -3246.974196 | 52.5 |
| 985  | 13v-03-DitrapIcos—fe2c4—2728 | -3246.974195 | 52.5 |
| 986  | 13v-02-Hen—fe2c4—1732        | -3246.974168 | 52.5 |
| 987  | 13v-01-Doc—fe2c4—683         | -3246.974163 | 52.5 |
| 988  | 13v-03-DitrapIcos—fe2c4—2574 | -3246.974116 | 52.6 |
| 989  | 13v-01-Doc—fe2c4—229         | -3246.974113 | 52.6 |
| 990  | 13v-02-Hen—fe2c4—1390        | -3246.974108 | 52.6 |
| 991  | 13v-01-Doc—fe2c4—706         | -3246.974077 | 52.6 |
| 992  | 13v-01-Doc—fe2c4—916         | -3246.974073 | 52.6 |
| 993  | 13v-01-Doc—fe2c4—835         | -3246.974035 | 52.6 |
| 994  | 13v-03-DitrapIcos—fe2c4—2437 | -3246.973968 | 52.7 |
| 995  | 13v-01-Doc—fe2c4—698         | -3246.973965 | 52.7 |
| 996  | 13v-01-Doc—fe2c4—391         | -3246.973954 | 52.7 |
| 997  | 13v-03-DitrapIcos—fe2c4—2335 | -3246.973953 | 52.7 |
| 998  | 13v-02-Hen—fe2c4—1930        | -3246.973919 | 52.7 |
| 999  | 13v-01-Doc—fe2c4—1101        | -3246.973867 | 52.7 |
| 1000 | 13v-01-Doc—fe2c4—316         | -3246.973866 | 52.7 |
| 1001 | 13v-04-CapHexAnPr—fe2c4—3173 | -3246.973839 | 52.7 |
| 1002 | 13v-02-Hen—fe2c4—1812        | -3246.973759 | 52.8 |
| 1003 | 13v-02-Hen—fe2c4—1414        | -3246.973732 | 52.8 |
| 1004 | 13v-02-Hen—fe2c4—1996        | -3246.973721 | 52.8 |
| 1005 | 13v-03-DitrapIcos—fe2c4—2664 | -3246.973713 | 52.8 |
| 1006 | 13v-02-Hen—fe2c4—1737        | -3246.973711 | 52.8 |
| 1007 | 13v-01-Doc—fe2c4—743         | -3246.973706 | 52.8 |
| 1008 | 13v-01-Doc—fe2c4—692         | -3246.973683 | 52.8 |
| 1009 | 13v-03-DitrapIcos—fe2c4—2724 | -3246.973646 | 52.9 |
| 1010 | 13v-04-CapHexAnPr—fe2c4—3010 | -3246.973602 | 52.9 |
| 1011 | 13v-01-Doc—fe2c4—962         | -3246.973556 | 52.9 |
| 1012 | 13v-01-Doc—fe2c4—1044        | -3246.973538 | 52.9 |
| 1013 | 13v-01-Doc—fe2c4—704         | -3246.973531 | 52.9 |
| 1014 | 13v-02-Hen—fe2c4—1450        | -3246.973508 | 52.9 |
| 1015 | 13v-02-Hen—fe2c4—1696        | -3246.973499 | 53.0 |
| 1016 | 13v-04-CapHexAnPr—fe2c4—2953 | -3246.973492 | 53.0 |
| 1017 | 13v-04-CapHexAnPr—fe2c4—2973 | -3246.973455 | 53.0 |

|      |                              |              |      |
|------|------------------------------|--------------|------|
| 1018 | 13v-01-Doc—fe2c4—265         | -3246.973411 | 53.0 |
| 1019 | 13v-01-Doc—fe2c4—728         | -3246.973359 | 53.0 |
| 1020 | 13v-01-Doc—fe2c4—1176        | -3246.97332  | 53.1 |
| 1021 | 13v-03-DitrapIcos—fe2c4—2351 | -3246.973302 | 53.1 |
| 1022 | 13v-02-Hen—fe2c4—2053        | -3246.973201 | 53.1 |
| 1023 | 13v-02-Hen—fe2c4—1419        | -3246.973199 | 53.1 |
| 1024 | 13v-01-Doc—fe2c4—689         | -3246.973171 | 53.2 |
| 1025 | 13v-04-CapHexAnPr—fe2c4—3275 | -3246.973117 | 53.2 |
| 1026 | 13v-02-Hen—fe2c4—1330        | -3246.973046 | 53.2 |
| 1027 | 13v-02-Hen—fe2c4—2075        | -3246.973025 | 53.2 |
| 1028 | 13v-01-Doc—fe2c4—645         | -3246.972942 | 53.3 |
| 1029 | 13v-02-Hen—fe2c4—2022        | -3246.972922 | 53.3 |
| 1030 | 13v-01-Doc—fe2c4—129         | -3246.972909 | 53.3 |
| 1031 | 13v-01-Doc—fe2c4—98          | -3246.972907 | 53.3 |
| 1032 | 13v-02-Hen—fe2c4—1535        | -3246.972906 | 53.3 |
| 1033 | 13v-01-Doc—fe2c4—793         | -3246.972867 | 53.3 |
| 1034 | 13v-01-Doc—fe2c4—135         | -3246.972849 | 53.4 |
| 1035 | 13v-01-Doc—fe2c4—928         | -3246.972815 | 53.4 |
| 1036 | 13v-01-Doc—fe2c4—151         | -3246.972768 | 53.4 |
| 1037 | 13v-03-DitrapIcos—fe2c4—2500 | -3246.97274  | 53.4 |
| 1038 | 13v-02-Hen—fe2c4—1601        | -3246.972612 | 53.5 |
| 1039 | 13v-01-Doc—fe2c4—99          | -3246.97257  | 53.5 |
| 1040 | 13v-02-Hen—fe2c4—1516        | -3246.972545 | 53.6 |
| 1041 | 13v-02-Hen—fe2c4—1423        | -3246.972441 | 53.6 |
| 1042 | 13v-01-Doc—fe2c4—226         | -3246.972401 | 53.6 |
| 1043 | 13v-02-Hen—fe2c4—1363        | -3246.97235  | 53.7 |
| 1044 | 13v-01-Doc—fe2c4—693         | -3246.972346 | 53.7 |
| 1045 | 13v-03-DitrapIcos—fe2c4—2606 | -3246.972332 | 53.7 |
| 1046 | 13v-02-Hen—fe2c4—1590        | -3246.972316 | 53.7 |
| 1047 | 13v-01-Doc—fe2c4—754         | -3246.972262 | 53.7 |
| 1048 | 13v-02-Hen—fe2c4—2073        | -3246.9722   | 53.8 |
| 1049 | 13v-02-Hen—fe2c4—1945        | -3246.972118 | 53.8 |
| 1050 | 13v-03-DitrapIcos—fe2c4—2551 | -3246.972099 | 53.8 |
| 1051 | 13v-04-CapHexAnPr—fe2c4—3258 | -3246.971848 | 54.0 |
| 1052 | 13v-01-Doc—fe2c4—444         | -3246.971808 | 54.0 |
| 1053 | 13v-03-DitrapIcos—fe2c4—2240 | -3246.971745 | 54.1 |
| 1054 | 13v-04-CapHexAnPr—fe2c4—3009 | -3246.97164  | 54.1 |
| 1055 | 13v-03-DitrapIcos—fe2c4—2257 | -3246.971586 | 54.2 |
| 1056 | 13v-03-DitrapIcos—fe2c4—2760 | -3246.971568 | 54.2 |
| 1057 | 13v-02-Hen—fe2c4—1551        | -3246.971526 | 54.2 |
| 1058 | 13v-02-Hen—fe2c4—1427        | -3246.971493 | 54.2 |
| 1059 | 13v-02-Hen—fe2c4—1892        | -3246.971438 | 54.2 |
| 1060 | 13v-03-DitrapIcos—fe2c4—2815 | -3246.971287 | 54.3 |
| 1061 | 13v-01-Doc—fe2c4—842         | -3246.971226 | 54.4 |
| 1062 | 13v-01-Doc—fe2c4—862         | -3246.971222 | 54.4 |
| 1063 | 13v-01-Doc—fe2c4—1029        | -3246.971169 | 54.4 |
| 1064 | 13v-01-Doc—fe2c4—1294        | -3246.971105 | 54.5 |
| 1065 | 13v-03-DitrapIcos—fe2c4—2883 | -3246.971087 | 54.5 |
| 1066 | 13v-04-CapHexAnPr—fe2c4—2972 | -3246.970955 | 54.5 |
| 1067 | 13v-02-Hen—fe2c4—1675        | -3246.970942 | 54.6 |
| 1068 | 13v-04-CapHexAnPr—fe2c4—3504 | -3246.970922 | 54.6 |

|      |                              |              |      |
|------|------------------------------|--------------|------|
| 1069 | 13v-03-DitrapIcos—fe2c4—2771 | -3246.970918 | 54.6 |
| 1070 | 13v-03-DitrapIcos—fe2c4—2805 | -3246.970844 | 54.6 |
| 1071 | 13v-04-CapHexAnPr—fe2c4—2982 | -3246.970836 | 54.6 |
| 1072 | 13v-01-Doc—fe2c4—865         | -3246.970831 | 54.6 |
| 1073 | 13v-01-Doc—fe2c4—1174        | -3246.970815 | 54.6 |
| 1074 | 13v-01-Doc—fe2c4—1033        | -3246.970811 | 54.6 |
| 1075 | 13v-01-Doc—fe2c4—1107        | -3246.970779 | 54.7 |
| 1076 | 13v-03-DitrapIcos—fe2c4—2707 | -3246.970756 | 54.7 |
| 1077 | 13v-03-DitrapIcos—fe2c4—2419 | -3246.970689 | 54.7 |
| 1078 | 13v-04-CapHexAnPr—fe2c4—3148 | -3246.970619 | 54.8 |
| 1079 | 13v-03-DitrapIcos—fe2c4—2639 | -3246.970617 | 54.8 |
| 1080 | 13v-01-Doc—fe2c4—854         | -3246.970608 | 54.8 |
| 1081 | 13v-03-DitrapIcos—fe2c4—2338 | -3246.970599 | 54.8 |
| 1082 | 13v-02-Hen—fe2c4—1424        | -3246.970544 | 54.8 |
| 1083 | 13v-04-CapHexAnPr—fe2c4—2976 | -3246.970531 | 54.8 |
| 1084 | 13v-01-Doc—fe2c4—650         | -3246.970472 | 54.9 |
| 1085 | 13v-02-Hen—fe2c4—1729        | -3246.970466 | 54.9 |
| 1086 | 13v-02-Hen—fe2c4—1803        | -3246.970374 | 54.9 |
| 1087 | 13v-04-CapHexAnPr—fe2c4—3327 | -3246.97037  | 54.9 |
| 1088 | 13v-01-Doc—fe2c4—408         | -3246.970282 | 55.0 |
| 1089 | 13v-04-CapHexAnPr—fe2c4—2992 | -3246.970261 | 55.0 |
| 1090 | 13v-04-CapHexAnPr—fe2c4—3284 | -3246.970247 | 55.0 |
| 1091 | 13v-01-Doc—fe2c4—672         | -3246.970216 | 55.0 |
| 1092 | 13v-03-DitrapIcos—fe2c4—2210 | -3246.970216 | 55.0 |
| 1093 | 13v-04-CapHexAnPr—fe2c4—3266 | -3246.970216 | 55.0 |
| 1094 | 13v-01-Doc—fe2c4—920         | -3246.970199 | 55.0 |
| 1095 | 13v-04-CapHexAnPr—fe2c4—3253 | -3246.970195 | 55.0 |
| 1096 | 13v-01-Doc—fe2c4—850         | -3246.970123 | 55.1 |
| 1097 | 13v-01-Doc—fe2c4—1055        | -3246.97006  | 55.1 |
| 1098 | 13v-03-DitrapIcos—fe2c4—2648 | -3246.970022 | 55.1 |
| 1099 | 13v-04-CapHexAnPr—fe2c4—3038 | -3246.969983 | 55.2 |
| 1100 | 13v-02-Hen—fe2c4—1739        | -3246.969941 | 55.2 |
| 1101 | 13v-02-Hen—fe2c4—2007        | -3246.969938 | 55.2 |
| 1102 | 13v-02-Hen—fe2c4—1988        | -3246.969929 | 55.2 |
| 1103 | 13v-02-Hen—fe2c4—1916        | -3246.969905 | 55.2 |
| 1104 | 13v-03-DitrapIcos—fe2c4—2593 | -3246.969838 | 55.2 |
| 1105 | 13v-01-Doc—fe2c4—1103        | -3246.969814 | 55.3 |
| 1106 | 13v-04-CapHexAnPr—fe2c4—3464 | -3246.969814 | 55.3 |
| 1107 | 13v-03-DitrapIcos—fe2c4—2649 | -3246.969804 | 55.3 |
| 1108 | 13v-02-Hen—fe2c4—1725        | -3246.969742 | 55.3 |
| 1109 | 13v-03-DitrapIcos—fe2c4—2792 | -3246.969732 | 55.3 |
| 1110 | 13v-03-DitrapIcos—fe2c4—2658 | -3246.969668 | 55.4 |
| 1111 | 13v-01-Doc—fe2c4—946         | -3246.969664 | 55.4 |
| 1112 | 13v-01-Doc—fe2c4—399         | -3246.969647 | 55.4 |
| 1113 | 13v-02-Hen—fe2c4—1859        | -3246.969647 | 55.4 |
| 1114 | 13v-02-Hen—fe2c4—1839        | -3246.969642 | 55.4 |
| 1115 | 13v-01-Doc—fe2c4—1028        | -3246.969632 | 55.4 |
| 1116 | 13v-01-Doc—fe2c4—959         | -3246.969628 | 55.4 |
| 1117 | 13v-01-Doc—fe2c4—639         | -3246.96958  | 55.4 |
| 1118 | 13v-02-Hen—fe2c4—1704        | -3246.96956  | 55.4 |
| 1119 | 13v-02-Hen—fe2c4—1882        | -3246.969528 | 55.4 |

|      |                               |              |      |
|------|-------------------------------|--------------|------|
| 1120 | 13v-01-Doc—fe2c4—-1075        | -3246.96951  | 55.5 |
| 1121 | 13v-01-Doc—fe2c4—-1008        | -3246.969495 | 55.5 |
| 1122 | 13v-02-Hen—fe2c4—-1560        | -3246.969485 | 55.5 |
| 1123 | 13v-03-DitrapIcos—fe2c4—-2604 | -3246.969483 | 55.5 |
| 1124 | 13v-03-DitrapIcos—fe2c4—-2524 | -3246.969451 | 55.5 |
| 1125 | 13v-03-DitrapIcos—fe2c4—-2220 | -3246.969391 | 55.5 |
| 1126 | 13v-01-Doc—fe2c4—-684         | -3246.96938  | 55.5 |
| 1127 | 13v-01-Doc—fe2c4—-1283        | -3246.969352 | 55.6 |
| 1128 | 13v-01-Doc—fe2c4—-813         | -3246.969321 | 55.6 |
| 1129 | 13v-03-DitrapIcos—fe2c4—-2630 | -3246.969312 | 55.6 |
| 1130 | 13v-01-Doc—fe2c4—-115         | -3246.969273 | 55.6 |
| 1131 | 13v-01-Doc—fe2c4—-742         | -3246.969262 | 55.6 |
| 1132 | 13v-01-Doc—fe2c4—-905         | -3246.969257 | 55.6 |
| 1133 | 13v-02-Hen—fe2c4—-2033        | -3246.969173 | 55.7 |
| 1134 | 13v-04-CapHexAnPr—fe2c4—-2995 | -3246.969169 | 55.7 |
| 1135 | 13v-01-Doc—fe2c4—-1222        | -3246.969124 | 55.7 |
| 1136 | 13v-02-Hen—fe2c4—-1886        | -3246.96907  | 55.7 |
| 1137 | 13v-03-DitrapIcos—fe2c4—-2214 | -3246.968965 | 55.8 |
| 1138 | 13v-02-Hen—fe2c4—-1801        | -3246.96895  | 55.8 |
| 1139 | 13v-01-Doc—fe2c4—-1085        | -3246.968942 | 55.8 |
| 1140 | 13v-02-Hen—fe2c4—-1776        | -3246.968929 | 55.8 |
| 1141 | 13v-01-Doc—fe2c4—-1148        | -3246.968924 | 55.8 |
| 1142 | 13v-01-Doc—fe2c4—-1089        | -3246.968903 | 55.8 |
| 1143 | 13v-03-DitrapIcos—fe2c4—-2573 | -3246.968883 | 55.8 |
| 1144 | 13v-02-Hen—fe2c4—-1888        | -3246.968854 | 55.9 |
| 1145 | 13v-01-Doc—fe2c4—-1143        | -3246.968847 | 55.9 |
| 1146 | 13v-01-Doc—fe2c4—-735         | -3246.968818 | 55.9 |
| 1147 | 13v-01-Doc—fe2c4—-272         | -3246.968767 | 55.9 |
| 1148 | 13v-03-DitrapIcos—fe2c4—-2579 | -3246.968708 | 56.0 |
| 1149 | 13v-03-DitrapIcos—fe2c4—-2581 | -3246.968674 | 56.0 |
| 1150 | 13v-03-DitrapIcos—fe2c4—-2260 | -3246.96866  | 56.0 |
| 1151 | 13v-01-Doc—fe2c4—-38          | -3246.968644 | 56.0 |
| 1152 | 13v-02-Hen—fe2c4—-1691        | -3246.968636 | 56.0 |
| 1153 | 13v-01-Doc—fe2c4—-792         | -3246.968498 | 56.1 |
| 1154 | 13v-03-DitrapIcos—fe2c4—-2640 | -3246.968493 | 56.1 |
| 1155 | 13v-02-Hen—fe2c4—-1708        | -3246.968405 | 56.1 |
| 1156 | 13v-02-Hen—fe2c4—-1425        | -3246.968401 | 56.2 |
| 1157 | 13v-03-DitrapIcos—fe2c4—-2706 | -3246.968364 | 56.2 |
| 1158 | 13v-04-CapHexAnPr—fe2c4—-3540 | -3246.968346 | 56.2 |
| 1159 | 13v-01-Doc—fe2c4—-909         | -3246.968315 | 56.2 |
| 1160 | 13v-04-CapHexAnPr—fe2c4—-3164 | -3246.968274 | 56.2 |
| 1161 | 13v-01-Doc—fe2c4—-407         | -3246.968266 | 56.2 |
| 1162 | 13v-02-Hen—fe2c4—-1302        | -3246.968265 | 56.2 |
| 1163 | 13v-02-Hen—fe2c4—-1315        | -3246.968189 | 56.3 |
| 1164 | 13v-02-Hen—fe2c4—-1742        | -3246.968175 | 56.3 |
| 1165 | 13v-01-Doc—fe2c4—-807         | -3246.968156 | 56.3 |
| 1166 | 13v-02-Hen—fe2c4—-1796        | -3246.968123 | 56.3 |
| 1167 | 13v-01-Doc—fe2c4—-223         | -3246.968089 | 56.3 |
| 1168 | 13v-02-Hen—fe2c4—-1381        | -3246.967944 | 56.4 |
| 1169 | 13v-02-Hen—fe2c4—-1730        | -3246.967902 | 56.5 |
| 1170 | 13v-04-CapHexAnPr—fe2c4—-2951 | -3246.967873 | 56.5 |

|      |                              |              |      |
|------|------------------------------|--------------|------|
| 1171 | 13v-01-Doc—fe2c4—861         | -3246.967844 | 56.5 |
| 1172 | 13v-03-DitrapIcos—fe2c4—2813 | -3246.967718 | 56.6 |
| 1173 | 13v-02-Hen—fe2c4—1678        | -3246.967634 | 56.6 |
| 1174 | 13v-03-DitrapIcos—fe2c4—2655 | -3246.967596 | 56.7 |
| 1175 | 13v-02-Hen—fe2c4—2014        | -3246.967548 | 56.7 |
| 1176 | 13v-01-Doc—fe2c4—1061        | -3246.967524 | 56.7 |
| 1177 | 13v-03-DitrapIcos—fe2c4—2547 | -3246.967516 | 56.7 |
| 1178 | 13v-02-Hen—fe2c4—1674        | -3246.967463 | 56.7 |
| 1179 | 13v-01-Doc—fe2c4—30          | -3246.967393 | 56.8 |
| 1180 | 13v-03-DitrapIcos—fe2c4—2325 | -3246.967388 | 56.8 |
| 1181 | 13v-01-Doc—fe2c4—123         | -3246.967368 | 56.8 |
| 1182 | 13v-02-Hen—fe2c4—1706        | -3246.967314 | 56.8 |
| 1183 | 13v-04-CapHexAnPr—fe2c4—2910 | -3246.96727  | 56.9 |
| 1184 | 13v-01-Doc—fe2c4—44          | -3246.967256 | 56.9 |
| 1185 | 13v-01-Doc—fe2c4—462         | -3246.967163 | 56.9 |
| 1186 | 13v-04-CapHexAnPr—fe2c4—3319 | -3246.967134 | 56.9 |
| 1187 | 13v-01-Doc—fe2c4—818         | -3246.967097 | 57.0 |
| 1188 | 13v-01-Doc—fe2c4—671         | -3246.967049 | 57.0 |
| 1189 | 13v-01-Doc—fe2c4—550         | -3246.967037 | 57.0 |
| 1190 | 13v-01-Doc—fe2c4—852         | -3246.966948 | 57.1 |
| 1191 | 13v-02-Hen—fe2c4—1847        | -3246.966857 | 57.1 |
| 1192 | 13v-02-Hen—fe2c4—1827        | -3246.966803 | 57.2 |
| 1193 | 13v-02-Hen—fe2c4—1301        | -3246.966706 | 57.2 |
| 1194 | 13v-02-Hen—fe2c4—1884        | -3246.966662 | 57.2 |
| 1195 | 13v-03-DitrapIcos—fe2c4—2860 | -3246.96666  | 57.2 |
| 1196 | 13v-03-DitrapIcos—fe2c4—2768 | -3246.966494 | 57.3 |
| 1197 | 13v-03-DitrapIcos—fe2c4—2748 | -3246.966354 | 57.4 |
| 1198 | 13v-03-DitrapIcos—fe2c4—2535 | -3246.966243 | 57.5 |
| 1199 | 13v-01-Doc—fe2c4—264         | -3246.966206 | 57.5 |
| 1200 | 13v-02-Hen—fe2c4—1861        | -3246.966128 | 57.6 |
| 1201 | 13v-03-DitrapIcos—fe2c4—2202 | -3246.966072 | 57.6 |
| 1202 | 13v-01-Doc—fe2c4—868         | -3246.966069 | 57.6 |
| 1203 | 13v-03-DitrapIcos—fe2c4—2152 | -3246.966038 | 57.6 |
| 1204 | 13v-01-Doc—fe2c4—332         | -3246.965997 | 57.7 |
| 1205 | 13v-02-Hen—fe2c4—1700        | -3246.965881 | 57.7 |
| 1206 | 13v-02-Hen—fe2c4—1735        | -3246.965875 | 57.7 |
| 1207 | 13v-01-Doc—fe2c4—432         | -3246.965866 | 57.7 |
| 1208 | 13v-02-Hen—fe2c4—1498        | -3246.965857 | 57.7 |
| 1209 | 13v-01-Doc—fe2c4—737         | -3246.965837 | 57.8 |
| 1210 | 13v-02-Hen—fe2c4—1463        | -3246.965823 | 57.8 |
| 1211 | 13v-02-Hen—fe2c4—1817        | -3246.965701 | 57.8 |
| 1212 | 13v-04-CapHexAnPr—fe2c4—3039 | -3246.965697 | 57.8 |
| 1213 | 13v-02-Hen—fe2c4—1997        | -3246.965693 | 57.8 |
| 1214 | 13v-03-DitrapIcos—fe2c4—2610 | -3246.965692 | 57.9 |
| 1215 | 13v-02-Hen—fe2c4—1754        | -3246.965677 | 57.9 |
| 1216 | 13v-02-Hen—fe2c4—1337        | -3246.965671 | 57.9 |
| 1217 | 13v-03-DitrapIcos—fe2c4—2537 | -3246.965651 | 57.9 |
| 1218 | 13v-01-Doc—fe2c4—377         | -3246.965649 | 57.9 |
| 1219 | 13v-03-DitrapIcos—fe2c4—2082 | -3246.965639 | 57.9 |
| 1220 | 13v-01-Doc—fe2c4—664         | -3246.965614 | 57.9 |
| 1221 | 13v-02-Hen—fe2c4—1492        | -3246.965603 | 57.9 |

|      |                              |              |      |
|------|------------------------------|--------------|------|
| 1222 | 13v-02-Hen—fe2c4—1326        | -3246.965589 | 57.9 |
| 1223 | 13v-03-DitrapIcos—fe2c4—2091 | -3246.965588 | 57.9 |
| 1224 | 13v-01-Doc—fe2c4—127         | -3246.965568 | 57.9 |
| 1225 | 13v-02-Hen—fe2c4—1972        | -3246.965509 | 58.0 |
| 1226 | 13v-03-DitrapIcos—fe2c4—2321 | -3246.965509 | 58.0 |
| 1227 | 13v-02-Hen—fe2c4—1442        | -3246.965501 | 58.0 |
| 1228 | 13v-02-Hen—fe2c4—1895        | -3246.965488 | 58.0 |
| 1229 | 13v-01-Doc—fe2c4—697         | -3246.965395 | 58.0 |
| 1230 | 13v-01-Doc—fe2c4—1001        | -3246.965291 | 58.1 |
| 1231 | 13v-04-CapHexAnPr—fe2c4—3439 | -3246.965291 | 58.1 |
| 1232 | 13v-01-Doc—fe2c4—575         | -3246.965252 | 58.1 |
| 1233 | 13v-01-Doc—fe2c4—626         | -3246.965222 | 58.1 |
| 1234 | 13v-01-Doc—fe2c4—974         | -3246.965199 | 58.2 |
| 1235 | 13v-01-Doc—fe2c4—236         | -3246.965188 | 58.2 |
| 1236 | 13v-01-Doc—fe2c4—1153        | -3246.965117 | 58.2 |
| 1237 | 13v-01-Doc—fe2c4—775         | -3246.965024 | 58.3 |
| 1238 | 13v-01-Doc—fe2c4—1279        | -3246.964983 | 58.3 |
| 1239 | 13v-01-Doc—fe2c4—1027        | -3246.964974 | 58.3 |
| 1240 | 13v-01-Doc—fe2c4—847         | -3246.964883 | 58.4 |
| 1241 | 13v-01-Doc—fe2c4—1175        | -3246.964678 | 58.5 |
| 1242 | 13v-04-CapHexAnPr—fe2c4—3279 | -3246.964678 | 58.5 |
| 1243 | 13v-01-Doc—fe2c4—1049        | -3246.964649 | 58.5 |
| 1244 | 13v-01-Doc—fe2c4—923         | -3246.964564 | 58.6 |
| 1245 | 13v-01-Doc—fe2c4—914         | -3246.964442 | 58.6 |
| 1246 | 13v-01-Doc—fe2c4—839         | -3246.964374 | 58.7 |
| 1247 | 13v-01-Doc—fe2c4—919         | -3246.96437  | 58.7 |
| 1248 | 13v-01-Doc—fe2c4—1262        | -3246.964359 | 58.7 |
| 1249 | 13v-03-DitrapIcos—fe2c4—2867 | -3246.964338 | 58.7 |
| 1250 | 13v-01-Doc—fe2c4—89          | -3246.964249 | 58.8 |
| 1251 | 13v-03-DitrapIcos—fe2c4—2217 | -3246.964081 | 58.9 |
| 1252 | 13v-01-Doc—fe2c4—549         | -3246.963968 | 58.9 |
| 1253 | 13v-01-Doc—fe2c4—810         | -3246.963936 | 59.0 |
| 1254 | 13v-01-Doc—fe2c4—1282        | -3246.963907 | 59.0 |
| 1255 | 13v-01-Doc—fe2c4—95          | -3246.963896 | 59.0 |
| 1256 | 13v-01-Doc—fe2c4—108         | -3246.963841 | 59.0 |
| 1257 | 13v-03-DitrapIcos—fe2c4—2438 | -3246.963835 | 59.0 |
| 1258 | 13v-01-Doc—fe2c4—874         | -3246.963772 | 59.1 |
| 1259 | 13v-03-DitrapIcos—fe2c4—2523 | -3246.963552 | 59.2 |
| 1260 | 13v-03-DitrapIcos—fe2c4—2634 | -3246.963545 | 59.2 |
| 1261 | 13v-01-Doc—fe2c4—797         | -3246.963495 | 59.2 |
| 1262 | 13v-01-Doc—fe2c4—740         | -3246.963323 | 59.3 |
| 1263 | 13v-02-Hen—fe2c4—1716        | -3246.963055 | 59.5 |
| 1264 | 13v-02-Hen—fe2c4—2019        | -3246.963024 | 59.5 |
| 1265 | 13v-02-Hen—fe2c4—2035        | -3246.963019 | 59.5 |
| 1266 | 13v-02-Hen—fe2c4—1989        | -3246.963003 | 59.5 |
| 1267 | 13v-01-Doc—fe2c4—1245        | -3246.962984 | 59.5 |
| 1268 | 13v-02-Hen—fe2c4—1734        | -3246.962973 | 59.6 |
| 1269 | 13v-01-Doc—fe2c4—968         | -3246.96295  | 59.6 |
| 1270 | 13v-01-Doc—fe2c4—1255        | -3246.962939 | 59.6 |
| 1271 | 13v-02-Hen—fe2c4—1816        | -3246.962919 | 59.6 |
| 1272 | 13v-03-DitrapIcos—fe2c4—2566 | -3246.962675 | 59.7 |



|      |                                |              |      |
|------|--------------------------------|--------------|------|
| 1273 | 13v-04-CapHexAnPr--fe2c4--3471 | -3246.962604 | 59.8 |
| 1274 | 13v-02-Hen--fe2c4--1947        | -3246.962555 | 59.8 |
| 1275 | 13v-01-Doc--fe2c4--1199        | -3246.96253  | 59.8 |
| 1276 | 13v-02-Hen--fe2c4--1795        | -3246.962483 | 59.9 |
| 1277 | 13v-04-CapHexAnPr--fe2c4--3404 | -3246.962471 | 59.9 |
| 1278 | 13v-02-Hen--fe2c4--1340        | -3246.962449 | 59.9 |
| 1279 | 13v-01-Doc--fe2c4--651         | -3246.962407 | 59.9 |
| 1280 | 13v-02-Hen--fe2c4--2059        | -3246.962396 | 59.9 |
| 1281 | 13v-04-CapHexAnPr--fe2c4--3332 | -3246.962363 | 59.9 |
| 1282 | 13v-01-Doc--fe2c4--824         | -3246.962343 | 60.0 |
| 1283 | 13v-02-Hen--fe2c4--1994        | -3246.96231  | 60.0 |
| 1284 | 13v-01-Doc--fe2c4--826         | -3246.962274 | 60.0 |
| 1285 | 13v-03-DitrapIcos--fe2c4--2741 | -3246.962257 | 60.0 |
| 1286 | 13v-01-Doc--fe2c4--1048        | -3246.962249 | 60.0 |
| 1287 | 13v-01-Doc--fe2c4--1223        | -3246.962123 | 60.1 |
| 1288 | 13v-02-Hen--fe2c4--1428        | -3246.962115 | 60.1 |
| 1289 | 13v-03-DitrapIcos--fe2c4--2671 | -3246.962078 | 60.1 |
| 1290 | 13v-01-Doc--fe2c4--629         | -3246.962065 | 60.1 |
| 1291 | 13v-03-DitrapIcos--fe2c4--2847 | -3246.962043 | 60.1 |
| 1292 | 13v-04-CapHexAnPr--fe2c4--3368 | -3246.96197  | 60.2 |
| 1293 | 13v-01-Doc--fe2c4--656         | -3246.961964 | 60.2 |
| 1294 | 13v-03-DitrapIcos--fe2c4--2735 | -3246.961949 | 60.2 |
| 1295 | 13v-02-Hen--fe2c4--1752        | -3246.961869 | 60.2 |
| 1296 | 13v-02-Hen--fe2c4--1354        | -3246.96186  | 60.3 |
| 1297 | 13v-03-DitrapIcos--fe2c4--2875 | -3246.961841 | 60.3 |
| 1298 | 13v-01-Doc--fe2c4--936         | -3246.961814 | 60.3 |
| 1299 | 13v-03-DitrapIcos--fe2c4--2685 | -3246.961785 | 60.3 |
| 1300 | 13v-01-Doc--fe2c4--941         | -3246.961784 | 60.3 |
| 1301 | 13v-02-Hen--fe2c4--1748        | -3246.961767 | 60.3 |
| 1302 | 13v-01-Doc--fe2c4--1116        | -3246.961711 | 60.3 |
| 1303 | 13v-01-Doc--fe2c4--118         | -3246.9617   | 60.4 |
| 1304 | 13v-03-DitrapIcos--fe2c4--2349 | -3246.961662 | 60.4 |
| 1305 | 13v-02-Hen--fe2c4--1482        | -3246.961652 | 60.4 |
| 1306 | 13v-01-Doc--fe2c4--794         | -3246.9616   | 60.4 |
| 1307 | 13v-01-Doc--fe2c4--1244        | -3246.96143  | 60.5 |
| 1308 | 13v-01-Doc--fe2c4--1182        | -3246.961393 | 60.5 |
| 1309 | 13v-01-Doc--fe2c4--764         | -3246.961345 | 60.6 |
| 1310 | 13v-04-CapHexAnPr--fe2c4--3437 | -3246.961298 | 60.6 |
| 1311 | 13v-04-CapHexAnPr--fe2c4--3514 | -3246.961297 | 60.6 |
| 1312 | 13v-04-CapHexAnPr--fe2c4--3483 | -3246.961242 | 60.6 |
| 1313 | 13v-02-Hen--fe2c4--1682        | -3246.961239 | 60.6 |
| 1314 | 13v-03-DitrapIcos--fe2c4--2778 | -3246.96116  | 60.7 |
| 1315 | 13v-01-Doc--fe2c4--955         | -3246.961149 | 60.7 |
| 1316 | 13v-02-Hen--fe2c4--1445        | -3246.961134 | 60.7 |
| 1317 | 13v-02-Hen--fe2c4--1693        | -3246.960988 | 60.8 |
| 1318 | 13v-01-Doc--fe2c4--392         | -3246.960962 | 60.8 |
| 1319 | 13v-04-CapHexAnPr--fe2c4--3456 | -3246.960961 | 60.8 |
| 1320 | 13v-02-Hen--fe2c4--2047        | -3246.960957 | 60.8 |
| 1321 | 13v-01-Doc--fe2c4--1236        | -3246.960946 | 60.8 |
| 1322 | 13v-01-Doc--fe2c4--270         | -3246.960914 | 60.8 |
| 1323 | 13v-01-Doc--fe2c4--1261        | -3246.960911 | 60.9 |

|      |                              |              |      |
|------|------------------------------|--------------|------|
| 1324 | 13v-03-DitrapIcos—fe2c4—2211 | -3246.960911 | 60.9 |
| 1325 | 13v-04-CapHexAnPr—fe2c4—2904 | -3246.960876 | 60.9 |
| 1326 | 13v-02-Hen—fe2c4—1867        | -3246.960834 | 60.9 |
| 1327 | 13v-03-DitrapIcos—fe2c4—2208 | -3246.960823 | 60.9 |
| 1328 | 13v-01-Doc—fe2c4—942         | -3246.960801 | 60.9 |
| 1329 | 13v-01-Doc—fe2c4—844         | -3246.960777 | 60.9 |
| 1330 | 13v-01-Doc—fe2c4—933         | -3246.960672 | 61.0 |
| 1331 | 13v-01-Doc—fe2c4—970         | -3246.960663 | 61.0 |
| 1332 | 13v-01-Doc—fe2c4—1082        | -3246.960604 | 61.0 |
| 1333 | 13v-02-Hen—fe2c4—1856        | -3246.960601 | 61.0 |
| 1334 | 13v-03-DitrapIcos—fe2c4—2224 | -3246.960334 | 61.2 |
| 1335 | 13v-01-Doc—fe2c4—1023        | -3246.960274 | 61.3 |
| 1336 | 13v-02-Hen—fe2c4—1623        | -3246.960274 | 61.3 |
| 1337 | 13v-02-Hen—fe2c4—1555        | -3246.96023  | 61.3 |
| 1338 | 13v-02-Hen—fe2c4—1375        | -3246.960226 | 61.3 |
| 1339 | 13v-02-Hen—fe2c4—1903        | -3246.96015  | 61.3 |
| 1340 | 13v-03-DitrapIcos—fe2c4—2729 | -3246.960013 | 61.4 |
| 1341 | 13v-01-Doc—fe2c4—1020        | -3246.960007 | 61.4 |
| 1342 | 13v-04-CapHexAnPr—fe2c4—3150 | -3246.959945 | 61.5 |
| 1343 | 13v-01-Doc—fe2c4—717         | -3246.959891 | 61.5 |
| 1344 | 13v-02-Hen—fe2c4—1813        | -3246.959878 | 61.5 |
| 1345 | 13v-01-Doc—fe2c4—752         | -3246.959799 | 61.5 |
| 1346 | 13v-04-CapHexAnPr—fe2c4—3147 | -3246.959767 | 61.6 |
| 1347 | 13v-03-DitrapIcos—fe2c4—2730 | -3246.959763 | 61.6 |
| 1348 | 13v-01-Doc—fe2c4—755         | -3246.959695 | 61.6 |
| 1349 | 13v-01-Doc—fe2c4—894         | -3246.959692 | 61.6 |
| 1350 | 13v-03-DitrapIcos—fe2c4—2738 | -3246.959678 | 61.6 |
| 1351 | 13v-03-DitrapIcos—fe2c4—2710 | -3246.95964  | 61.6 |
| 1352 | 13v-03-DitrapIcos—fe2c4—2086 | -3246.959629 | 61.7 |
| 1353 | 13v-01-Doc—fe2c4—1041        | -3246.959618 | 61.7 |
| 1354 | 13v-03-DitrapIcos—fe2c4—2085 | -3246.959614 | 61.7 |
| 1355 | 13v-01-Doc—fe2c4—1060        | -3246.959582 | 61.7 |
| 1356 | 13v-03-DitrapIcos—fe2c4—2657 | -3246.959579 | 61.7 |
| 1357 | 13v-02-Hen—fe2c4—1660        | -3246.959576 | 61.7 |
| 1358 | 13v-02-Hen—fe2c4—1646        | -3246.959501 | 61.7 |
| 1359 | 13v-01-Doc—fe2c4—1052        | -3246.95947  | 61.8 |
| 1360 | 13v-04-CapHexAnPr—fe2c4—3168 | -3246.959414 | 61.8 |
| 1361 | 13v-03-DitrapIcos—fe2c4—2494 | -3246.959366 | 61.8 |
| 1362 | 13v-02-Hen—fe2c4—1771        | -3246.95927  | 61.9 |
| 1363 | 13v-03-DitrapIcos—fe2c4—2199 | -3246.959228 | 61.9 |
| 1364 | 13v-01-Doc—fe2c4—240         | -3246.959133 | 62.0 |
| 1365 | 13v-02-Hen—fe2c4—1688        | -3246.95913  | 62.0 |
| 1366 | 13v-03-DitrapIcos—fe2c4—2320 | -3246.959069 | 62.0 |
| 1367 | 13v-04-CapHexAnPr—fe2c4—2961 | -3246.959066 | 62.0 |
| 1368 | 13v-03-DitrapIcos—fe2c4—2355 | -3246.959019 | 62.0 |
| 1369 | 13v-01-Doc—fe2c4—1293        | -3246.959018 | 62.0 |
| 1370 | 13v-03-DitrapIcos—fe2c4—2458 | -3246.959015 | 62.0 |
| 1371 | 13v-01-Doc—fe2c4—949         | -3246.958992 | 62.1 |
| 1372 | 13v-01-Doc—fe2c4—640         | -3246.95899  | 62.1 |
| 1373 | 13v-03-DitrapIcos—fe2c4—2169 | -3246.958972 | 62.1 |
| 1374 | 13v-02-Hen—fe2c4—1402        | -3246.958971 | 62.1 |

|      |                              |              |      |
|------|------------------------------|--------------|------|
| 1375 | 13v-03-DitrapIcos—fe2c4—2660 | -3246.958912 | 62.1 |
| 1376 | 13v-01-Doc—fe2c4—1254        | -3246.958907 | 62.1 |
| 1377 | 13v-02-Hen—fe2c4—1800        | -3246.958823 | 62.2 |
| 1378 | 13v-03-DitrapIcos—fe2c4—2463 | -3246.958806 | 62.2 |
| 1379 | 13v-02-Hen—fe2c4—1371        | -3246.958787 | 62.2 |
| 1380 | 13v-01-Doc—fe2c4—932         | -3246.958784 | 62.2 |
| 1381 | 13v-02-Hen—fe2c4—1848        | -3246.958769 | 62.2 |
| 1382 | 13v-04-CapHexAnPr—fe2c4—3294 | -3246.958759 | 62.2 |
| 1383 | 13v-01-Doc—fe2c4—605         | -3246.958749 | 62.2 |
| 1384 | 13v-02-Hen—fe2c4—1444        | -3246.958701 | 62.2 |
| 1385 | 13v-01-Doc—fe2c4—1211        | -3246.958652 | 62.3 |
| 1386 | 13v-03-DitrapIcos—fe2c4—2824 | -3246.958601 | 62.3 |
| 1387 | 13v-01-Doc—fe2c4—424         | -3246.958576 | 62.3 |
| 1388 | 13v-03-DitrapIcos—fe2c4—2784 | -3246.958555 | 62.3 |
| 1389 | 13v-02-Hen—fe2c4—2060        | -3246.958468 | 62.4 |
| 1390 | 13v-02-Hen—fe2c4—1824        | -3246.958458 | 62.4 |
| 1391 | 13v-01-Doc—fe2c4—882         | -3246.958432 | 62.4 |
| 1392 | 13v-04-CapHexAnPr—fe2c4—3475 | -3246.958358 | 62.5 |
| 1393 | 13v-01-Doc—fe2c4—741         | -3246.958337 | 62.5 |
| 1394 | 13v-01-Doc—fe2c4—403         | -3246.958332 | 62.5 |
| 1395 | 13v-03-DitrapIcos—fe2c4—2363 | -3246.958321 | 62.5 |
| 1396 | 13v-04-CapHexAnPr—fe2c4—3492 | -3246.958278 | 62.5 |
| 1397 | 13v-01-Doc—fe2c4—411         | -3246.958167 | 62.6 |
| 1398 | 13v-01-Doc—fe2c4—164         | -3246.958162 | 62.6 |
| 1399 | 13v-03-DitrapIcos—fe2c4—2144 | -3246.958123 | 62.6 |
| 1400 | 13v-02-Hen—fe2c4—1877        | -3246.958097 | 62.6 |
| 1401 | 13v-01-Doc—fe2c4—1210        | -3246.958049 | 62.6 |
| 1402 | 13v-01-Doc—fe2c4—101         | -3246.958038 | 62.7 |
| 1403 | 13v-01-Doc—fe2c4—1229        | -3246.958025 | 62.7 |
| 1404 | 13v-01-Doc—fe2c4—655         | -3246.958022 | 62.7 |
| 1405 | 13v-02-Hen—fe2c4—1585        | -3246.958012 | 62.7 |
| 1406 | 13v-03-DitrapIcos—fe2c4—2370 | -3246.957917 | 62.7 |
| 1407 | 13v-01-Doc—fe2c4—538         | -3246.957908 | 62.7 |
| 1408 | 13v-02-Hen—fe2c4—1721        | -3246.957823 | 62.8 |
| 1409 | 13v-01-Doc—fe2c4—746         | -3246.957819 | 62.8 |
| 1410 | 13v-01-Doc—fe2c4—1139        | -3246.957788 | 62.8 |
| 1411 | 13v-03-DitrapIcos—fe2c4—2509 | -3246.95772  | 62.9 |
| 1412 | 13v-02-Hen—fe2c4—1581        | -3246.957664 | 62.9 |
| 1413 | 13v-04-CapHexAnPr—fe2c4—2952 | -3246.957588 | 62.9 |
| 1414 | 13v-01-Doc—fe2c4—140         | -3246.957517 | 63.0 |
| 1415 | 13v-01-Doc—fe2c4—887         | -3246.957505 | 63.0 |
| 1416 | 13v-04-CapHexAnPr—fe2c4—3179 | -3246.957208 | 63.2 |
| 1417 | 13v-02-Hen—fe2c4—1978        | -3246.957189 | 63.2 |
| 1418 | 13v-02-Hen—fe2c4—1546        | -3246.957164 | 63.2 |
| 1419 | 13v-03-DitrapIcos—fe2c4—2829 | -3246.957163 | 63.2 |
| 1420 | 13v-01-Doc—fe2c4—390         | -3246.957082 | 63.3 |
| 1421 | 13v-04-CapHexAnPr—fe2c4—3007 | -3246.95707  | 63.3 |
| 1422 | 13v-01-Doc—fe2c4—815         | -3246.957054 | 63.3 |
| 1423 | 13v-03-DitrapIcos—fe2c4—2508 | -3246.957024 | 63.3 |
| 1424 | 13v-04-CapHexAnPr—fe2c4—3356 | -3246.956928 | 63.4 |
| 1425 | 13v-03-DitrapIcos—fe2c4—2408 | -3246.956915 | 63.4 |

|      |                              |              |      |
|------|------------------------------|--------------|------|
| 1426 | 13v-03-DitrapIcos—fe2c4—2401 | -3246.956906 | 63.4 |
| 1427 | 13v-02-Hen—fe2c4—1893        | -3246.956901 | 63.4 |
| 1428 | 13v-02-Hen—fe2c4—1879        | -3246.956875 | 63.4 |
| 1429 | 13v-01-Doc—fe2c4—104         | -3246.956869 | 63.4 |
| 1430 | 13v-04-CapHexAnPr—fe2c4—3403 | -3246.956755 | 63.5 |
| 1431 | 13v-02-Hen—fe2c4—1825        | -3246.956658 | 63.5 |
| 1432 | 13v-04-CapHexAnPr—fe2c4—3278 | -3246.95658  | 63.6 |
| 1433 | 13v-01-Doc—fe2c4—886         | -3246.95644  | 63.7 |
| 1434 | 13v-04-CapHexAnPr—fe2c4—3309 | -3246.956374 | 63.7 |
| 1435 | 13v-02-Hen—fe2c4—1562        | -3246.956365 | 63.7 |
| 1436 | 13v-01-Doc—fe2c4—1203        | -3246.956291 | 63.7 |
| 1437 | 13v-03-DitrapIcos—fe2c4—2696 | -3246.956276 | 63.8 |
| 1438 | 13v-04-CapHexAnPr—fe2c4—3501 | -3246.956276 | 63.8 |
| 1439 | 13v-02-Hen—fe2c4—1391        | -3246.956261 | 63.8 |
| 1440 | 13v-03-DitrapIcos—fe2c4—2646 | -3246.956241 | 63.8 |
| 1441 | 13v-01-Doc—fe2c4—1206        | -3246.956231 | 63.8 |
| 1442 | 13v-03-DitrapIcos—fe2c4—2372 | -3246.956079 | 63.9 |
| 1443 | 13v-02-Hen—fe2c4—1792        | -3246.956073 | 63.9 |
| 1444 | 13v-02-Hen—fe2c4—1435        | -3246.95607  | 63.9 |
| 1445 | 13v-01-Doc—fe2c4—581         | -3246.956059 | 63.9 |
| 1446 | 13v-04-CapHexAnPr—fe2c4—2977 | -3246.956025 | 63.9 |
| 1447 | 13v-03-DitrapIcos—fe2c4—2570 | -3246.95598  | 63.9 |
| 1448 | 13v-02-Hen—fe2c4—1831        | -3246.955961 | 64.0 |
| 1449 | 13v-03-DitrapIcos—fe2c4—2599 | -3246.95596  | 64.0 |
| 1450 | 13v-03-DitrapIcos—fe2c4—2454 | -3246.955943 | 64.0 |
| 1451 | 13v-03-DitrapIcos—fe2c4—2194 | -3246.955915 | 64.0 |
| 1452 | 13v-02-Hen—fe2c4—1666        | -3246.955826 | 64.0 |
| 1453 | 13v-03-DitrapIcos—fe2c4—2878 | -3246.955822 | 64.0 |
| 1454 | 13v-02-Hen—fe2c4—2021        | -3246.955815 | 64.0 |
| 1455 | 13v-02-Hen—fe2c4—2003        | -3246.955804 | 64.1 |
| 1456 | 13v-03-DitrapIcos—fe2c4—2885 | -3246.955788 | 64.1 |
| 1457 | 13v-01-Doc—fe2c4—612         | -3246.955781 | 64.1 |
| 1458 | 13v-01-Doc—fe2c4—138         | -3246.955777 | 64.1 |
| 1459 | 13v-03-DitrapIcos—fe2c4—2368 | -3246.955694 | 64.1 |
| 1460 | 13v-01-Doc—fe2c4—625         | -3246.95568  | 64.1 |
| 1461 | 13v-02-Hen—fe2c4—1653        | -3246.95562  | 64.2 |
| 1462 | 13v-01-Doc—fe2c4—277         | -3246.955557 | 64.2 |
| 1463 | 13v-03-DitrapIcos—fe2c4—2446 | -3246.955551 | 64.2 |
| 1464 | 13v-01-Doc—fe2c4—1077        | -3246.955468 | 64.3 |
| 1465 | 13v-04-CapHexAnPr—fe2c4—3245 | -3246.955459 | 64.3 |
| 1466 | 13v-02-Hen—fe2c4—1673        | -3246.955456 | 64.3 |
| 1467 | 13v-03-DitrapIcos—fe2c4—2445 | -3246.955449 | 64.3 |
| 1468 | 13v-01-Doc—fe2c4—624         | -3246.955445 | 64.3 |
| 1469 | 13v-03-DitrapIcos—fe2c4—2184 | -3246.955434 | 64.3 |
| 1470 | 13v-02-Hen—fe2c4—1550        | -3246.955358 | 64.3 |
| 1471 | 13v-03-DitrapIcos—fe2c4—2442 | -3246.95535  | 64.3 |
| 1472 | 13v-03-DitrapIcos—fe2c4—2753 | -3246.955347 | 64.3 |
| 1473 | 13v-02-Hen—fe2c4—1685        | -3246.955322 | 64.4 |
| 1474 | 13v-04-CapHexAnPr—fe2c4—3227 | -3246.955266 | 64.4 |
| 1475 | 13v-01-Doc—fe2c4—202         | -3246.955202 | 64.4 |
| 1476 | 13v-01-Doc—fe2c4—694         | -3246.955091 | 64.5 |

|      |                               |              |      |
|------|-------------------------------|--------------|------|
| 1477 | 13v-03-DitrapIcos—fe2c4—-2481 | -3246.955074 | 64.5 |
| 1478 | 13v-04-CapHexAnPr—fe2c4—-3233 | -3246.955038 | 64.5 |
| 1479 | 13v-04-CapHexAnPr—fe2c4—-3590 | -3246.955017 | 64.5 |
| 1480 | 13v-01-Doc—fe2c4—-386         | -3246.954992 | 64.6 |
| 1481 | 13v-04-CapHexAnPr—fe2c4—-3210 | -3246.954987 | 64.6 |
| 1482 | 13v-03-DitrapIcos—fe2c4—-2709 | -3246.954983 | 64.6 |
| 1483 | 13v-03-DitrapIcos—fe2c4—-2779 | -3246.954983 | 64.6 |
| 1484 | 13v-02-Hen—fe2c4—-1872        | -3246.954924 | 64.6 |
| 1485 | 13v-02-Hen—fe2c4—-1677        | -3246.954919 | 64.6 |
| 1486 | 13v-03-DitrapIcos—fe2c4—-2218 | -3246.954905 | 64.6 |
| 1487 | 13v-02-Hen—fe2c4—-1561        | -3246.954886 | 64.6 |
| 1488 | 13v-04-CapHexAnPr—fe2c4—-3250 | -3246.95488  | 64.6 |
| 1489 | 13v-03-DitrapIcos—fe2c4—-2410 | -3246.954865 | 64.6 |
| 1490 | 13v-03-DitrapIcos—fe2c4—-2466 | -3246.95484  | 64.7 |
| 1491 | 13v-01-Doc—fe2c4—-646         | -3246.954833 | 64.7 |
| 1492 | 13v-04-CapHexAnPr—fe2c4—-3182 | -3246.954783 | 64.7 |
| 1493 | 13v-01-Doc—fe2c4—-667         | -3246.954781 | 64.7 |
| 1494 | 13v-01-Doc—fe2c4—-322         | -3246.95478  | 64.7 |
| 1495 | 13v-01-Doc—fe2c4—-534         | -3246.954761 | 64.7 |
| 1496 | 13v-02-Hen—fe2c4—-1574        | -3246.954743 | 64.7 |
| 1497 | 13v-03-DitrapIcos—fe2c4—-2334 | -3246.954741 | 64.7 |
| 1498 | 13v-04-CapHexAnPr—fe2c4—-3299 | -3246.954741 | 64.7 |
| 1499 | 13v-01-Doc—fe2c4—-111         | -3246.954726 | 64.7 |
| 1500 | 13v-01-Doc—fe2c4—-274         | -3246.954707 | 64.7 |
| 1501 | 13v-02-Hen—fe2c4—-1613        | -3246.9547   | 64.7 |
| 1502 | 13v-03-DitrapIcos—fe2c4—-2742 | -3246.954698 | 64.7 |
| 1503 | 13v-02-Hen—fe2c4—-1596        | -3246.954665 | 64.8 |
| 1504 | 13v-03-DitrapIcos—fe2c4—-2175 | -3246.954655 | 64.8 |
| 1505 | 13v-01-Doc—fe2c4—-649         | -3246.95461  | 64.8 |
| 1506 | 13v-02-Hen—fe2c4—-1662        | -3246.954604 | 64.8 |
| 1507 | 13v-02-Hen—fe2c4—-1759        | -3246.954596 | 64.8 |
| 1508 | 13v-02-Hen—fe2c4—-1651        | -3246.954534 | 64.9 |
| 1509 | 13v-01-Doc—fe2c4—-812         | -3246.954507 | 64.9 |
| 1510 | 13v-01-Doc—fe2c4—-1235        | -3246.954373 | 65.0 |
| 1511 | 13v-03-DitrapIcos—fe2c4—-2855 | -3246.954361 | 65.0 |
| 1512 | 13v-02-Hen—fe2c4—-1531        | -3246.954256 | 65.0 |
| 1513 | 13v-02-Hen—fe2c4—-2030        | -3246.954236 | 65.0 |
| 1514 | 13v-01-Doc—fe2c4—-1184        | -3246.954208 | 65.1 |
| 1515 | 13v-01-Doc—fe2c4—-1207        | -3246.95419  | 65.1 |
| 1516 | 13v-03-DitrapIcos—fe2c4—-2084 | -3246.954183 | 65.1 |
| 1517 | 13v-02-Hen—fe2c4—-1304        | -3246.954175 | 65.1 |
| 1518 | 13v-04-CapHexAnPr—fe2c4—-3392 | -3246.954138 | 65.1 |
| 1519 | 13v-01-Doc—fe2c4—-463         | -3246.954137 | 65.1 |
| 1520 | 13v-03-DitrapIcos—fe2c4—-2315 | -3246.954067 | 65.1 |
| 1521 | 13v-04-CapHexAnPr—fe2c4—-3476 | -3246.954067 | 65.1 |
| 1522 | 13v-02-Hen—fe2c4—-1982        | -3246.953968 | 65.2 |
| 1523 | 13v-02-Hen—fe2c4—-1388        | -3246.953844 | 65.3 |
| 1524 | 13v-01-Doc—fe2c4—-1226        | -3246.953724 | 65.4 |
| 1525 | 13v-02-Hen—fe2c4—-1778        | -3246.953677 | 65.4 |
| 1526 | 13v-02-Hen—fe2c4—-1710        | -3246.953644 | 65.4 |
| 1527 | 13v-03-DitrapIcos—fe2c4—-2205 | -3246.95364  | 65.4 |

|      |                              |              |      |
|------|------------------------------|--------------|------|
| 1528 | 13v-01-Doc—fe2c4—1233        | -3246.953593 | 65.4 |
| 1529 | 13v-03-DitrapIcos—fe2c4—2822 | -3246.953545 | 65.5 |
| 1530 | 13v-04-CapHexAnPr—fe2c4—3311 | -3246.953544 | 65.5 |
| 1531 | 13v-01-Doc—fe2c4—569         | -3246.953535 | 65.5 |
| 1532 | 13v-02-Hen—fe2c4—1633        | -3246.953508 | 65.5 |
| 1533 | 13v-01-Doc—fe2c4—4           | -3246.953473 | 65.5 |
| 1534 | 13v-03-DitrapIcos—fe2c4—2080 | -3246.953467 | 65.5 |
| 1535 | 13v-03-DitrapIcos—fe2c4—2333 | -3246.95339  | 65.6 |
| 1536 | 13v-04-CapHexAnPr—fe2c4—3373 | -3246.953313 | 65.6 |
| 1537 | 13v-01-Doc—fe2c4—461         | -3246.953283 | 65.6 |
| 1538 | 13v-01-Doc—fe2c4—1258        | -3246.953235 | 65.7 |
| 1539 | 13v-02-Hen—fe2c4—1935        | -3246.953181 | 65.7 |
| 1540 | 13v-02-Hen—fe2c4—1605        | -3246.953116 | 65.7 |
| 1541 | 13v-02-Hen—fe2c4—1937        | -3246.953075 | 65.8 |
| 1542 | 13v-03-DitrapIcos—fe2c4—2429 | -3246.95296  | 65.8 |
| 1543 | 13v-02-Hen—fe2c4—1905        | -3246.952923 | 65.9 |
| 1544 | 13v-02-Hen—fe2c4—1707        | -3246.952913 | 65.9 |
| 1545 | 13v-03-DitrapIcos—fe2c4—2780 | -3246.952815 | 65.9 |
| 1546 | 13v-04-CapHexAnPr—fe2c4—3377 | -3246.952802 | 65.9 |
| 1547 | 13v-04-CapHexAnPr—fe2c4—3165 | -3246.952725 | 66.0 |
| 1548 | 13v-02-Hen—fe2c4—1885        | -3246.95268  | 66.0 |
| 1549 | 13v-02-Hen—fe2c4—1692        | -3246.95261  | 66.1 |
| 1550 | 13v-03-DitrapIcos—fe2c4—2447 | -3246.952602 | 66.1 |
| 1551 | 13v-01-Doc—fe2c4—163         | -3246.952575 | 66.1 |
| 1552 | 13v-01-Doc—fe2c4—707         | -3246.952516 | 66.1 |
| 1553 | 13v-02-Hen—fe2c4—1650        | -3246.95249  | 66.1 |
| 1554 | 13v-01-Doc—fe2c4—342         | -3246.952445 | 66.2 |
| 1555 | 13v-01-Doc—fe2c4—1073        | -3246.952351 | 66.2 |
| 1556 | 13v-01-Doc—fe2c4—1043        | -3246.952295 | 66.3 |
| 1557 | 13v-02-Hen—fe2c4—1860        | -3246.952217 | 66.3 |
| 1558 | 13v-04-CapHexAnPr—fe2c4—3421 | -3246.952188 | 66.3 |
| 1559 | 13v-03-DitrapIcos—fe2c4—2264 | -3246.952162 | 66.3 |
| 1560 | 13v-03-DitrapIcos—fe2c4—2546 | -3246.952162 | 66.3 |
| 1561 | 13v-01-Doc—fe2c4—23          | -3246.952121 | 66.4 |
| 1562 | 13v-04-CapHexAnPr—fe2c4—3359 | -3246.952104 | 66.4 |
| 1563 | 13v-03-DitrapIcos—fe2c4—2111 | -3246.951947 | 66.5 |
| 1564 | 13v-01-Doc—fe2c4—753         | -3246.951946 | 66.5 |
| 1565 | 13v-01-Doc—fe2c4—705         | -3246.951944 | 66.5 |
| 1566 | 13v-01-Doc—fe2c4—709         | -3246.951886 | 66.5 |
| 1567 | 13v-02-Hen—fe2c4—1636        | -3246.951866 | 66.5 |
| 1568 | 13v-04-CapHexAnPr—fe2c4—3484 | -3246.951846 | 66.5 |
| 1569 | 13v-02-Hen—fe2c4—1629        | -3246.95184  | 66.5 |
| 1570 | 13v-01-Doc—fe2c4—288         | -3246.951739 | 66.6 |
| 1571 | 13v-04-CapHexAnPr—fe2c4—3222 | -3246.951736 | 66.6 |
| 1572 | 13v-01-Doc—fe2c4—119         | -3246.951705 | 66.6 |
| 1573 | 13v-02-Hen—fe2c4—1319        | -3246.951702 | 66.6 |
| 1574 | 13v-04-CapHexAnPr—fe2c4—3255 | -3246.951684 | 66.6 |
| 1575 | 13v-04-CapHexAnPr—fe2c4—3251 | -3246.951664 | 66.7 |
| 1576 | 13v-03-DitrapIcos—fe2c4—2580 | -3246.951594 | 66.7 |
| 1577 | 13v-01-Doc—fe2c4—422         | -3246.951512 | 66.7 |
| 1578 | 13v-04-CapHexAnPr—fe2c4—3427 | -3246.951435 | 66.8 |

|      |                              |              |      |
|------|------------------------------|--------------|------|
| 1579 | 13v-01-Doc—fe2c4—1118        | -3246.951377 | 66.8 |
| 1580 | 13v-03-DitrapIcos—fe2c4—2450 | -3246.951363 | 66.8 |
| 1581 | 13v-03-DitrapIcos—fe2c4—2689 | -3246.951352 | 66.8 |
| 1582 | 13v-01-Doc—fe2c4—589         | -3246.95132  | 66.9 |
| 1583 | 13v-04-CapHexAnPr—fe2c4—3235 | -3246.951282 | 66.9 |
| 1584 | 13v-01-Doc—fe2c4—777         | -3246.951276 | 66.9 |
| 1585 | 13v-01-Doc—fe2c4—660         | -3246.951194 | 66.9 |
| 1586 | 13v-02-Hen—fe2c4—1506        | -3246.951087 | 67.0 |
| 1587 | 13v-04-CapHexAnPr—fe2c4—3257 | -3246.951051 | 67.0 |
| 1588 | 13v-04-CapHexAnPr—fe2c4—3276 | -3246.951051 | 67.0 |
| 1589 | 13v-01-Doc—fe2c4—1121        | -3246.951049 | 67.0 |
| 1590 | 13v-02-Hen—fe2c4—1822        | -3246.951021 | 67.1 |
| 1591 | 13v-03-DitrapIcos—fe2c4—2793 | -3246.951016 | 67.1 |
| 1592 | 13v-04-CapHexAnPr—fe2c4—3568 | -3246.950964 | 67.1 |
| 1593 | 13v-02-Hen—fe2c4—1820        | -3246.95089  | 67.1 |
| 1594 | 13v-02-Hen—fe2c4—1615        | -3246.950877 | 67.1 |
| 1595 | 13v-03-DitrapIcos—fe2c4—2158 | -3246.950862 | 67.2 |
| 1596 | 13v-04-CapHexAnPr—fe2c4—2979 | -3246.95083  | 67.2 |
| 1597 | 13v-02-Hen—fe2c4—1927        | -3246.950826 | 67.2 |
| 1598 | 13v-04-CapHexAnPr—fe2c4—3201 | -3246.950807 | 67.2 |
| 1599 | 13v-01-Doc—fe2c4—979         | -3246.950749 | 67.2 |
| 1600 | 13v-03-DitrapIcos—fe2c4—2307 | -3246.950704 | 67.3 |
| 1601 | 13v-01-Doc—fe2c4—1208        | -3246.950644 | 67.3 |
| 1602 | 13v-03-DitrapIcos—fe2c4—2774 | -3246.950644 | 67.3 |
| 1603 | 13v-02-Hen—fe2c4—1527        | -3246.950597 | 67.3 |
| 1604 | 13v-03-DitrapIcos—fe2c4—2615 | -3246.95043  | 67.4 |
| 1605 | 13v-01-Doc—fe2c4—849         | -3246.950414 | 67.4 |
| 1606 | 13v-02-Hen—fe2c4—1557        | -3246.950401 | 67.4 |
| 1607 | 13v-01-Doc—fe2c4—1209        | -3246.950394 | 67.5 |
| 1608 | 13v-01-Doc—fe2c4—25          | -3246.950339 | 67.5 |
| 1609 | 13v-01-Doc—fe2c4—1228        | -3246.95032  | 67.5 |
| 1610 | 13v-03-DitrapIcos—fe2c4—2700 | -3246.950307 | 67.5 |
| 1611 | 13v-01-Doc—fe2c4—1140        | -3246.950289 | 67.5 |
| 1612 | 13v-03-DitrapIcos—fe2c4—2147 | -3246.950287 | 67.5 |
| 1613 | 13v-04-CapHexAnPr—fe2c4—3268 | -3246.950287 | 67.5 |
| 1614 | 13v-01-Doc—fe2c4—1168        | -3246.950277 | 67.5 |
| 1615 | 13v-02-Hen—fe2c4—1854        | -3246.950248 | 67.5 |
| 1616 | 13v-02-Hen—fe2c4—1587        | -3246.950206 | 67.6 |
| 1617 | 13v-01-Doc—fe2c4—245         | -3246.950203 | 67.6 |
| 1618 | 13v-01-Doc—fe2c4—20          | -3246.95019  | 67.6 |
| 1619 | 13v-01-Doc—fe2c4—364         | -3246.950127 | 67.6 |
| 1620 | 13v-02-Hen—fe2c4—1592        | -3246.950125 | 67.6 |
| 1621 | 13v-02-Hen—fe2c4—1842        | -3246.950123 | 67.6 |
| 1622 | 13v-04-CapHexAnPr—fe2c4—3260 | -3246.950099 | 67.6 |
| 1623 | 13v-04-CapHexAnPr—fe2c4—3228 | -3246.950083 | 67.6 |
| 1624 | 13v-04-CapHexAnPr—fe2c4—2985 | -3246.950074 | 67.7 |
| 1625 | 13v-02-Hen—fe2c4—1946        | -3246.95006  | 67.7 |
| 1626 | 13v-02-Hen—fe2c4—1661        | -3246.950051 | 67.7 |
| 1627 | 13v-01-Doc—fe2c4—1172        | -3246.950036 | 67.7 |
| 1628 | 13v-04-CapHexAnPr—fe2c4—3447 | -3246.950019 | 67.7 |
| 1629 | 13v-02-Hen—fe2c4—1356        | -3246.950006 | 67.7 |

|      |                               |              |      |
|------|-------------------------------|--------------|------|
| 1630 | 13v-03-DitrapIcos—fe2c4—-2569 | -3246.949974 | 67.7 |
| 1631 | 13v-02-Hen—fe2c4—-1974        | -3246.949972 | 67.7 |
| 1632 | 13v-01-Doc—fe2c4—-848         | -3246.94993  | 67.7 |
| 1633 | 13v-01-Doc—fe2c4—-1012        | -3246.949905 | 67.8 |
| 1634 | 13v-01-Doc—fe2c4—-904         | -3246.949898 | 67.8 |
| 1635 | 13v-04-CapHexAnPr—fe2c4—-3234 | -3246.949878 | 67.8 |
| 1636 | 13v-04-CapHexAnPr—fe2c4—-3211 | -3246.949856 | 67.8 |
| 1637 | 13v-02-Hen—fe2c4—-1521        | -3246.949825 | 67.8 |
| 1638 | 13v-03-DitrapIcos—fe2c4—-2516 | -3246.949792 | 67.8 |
| 1639 | 13v-02-Hen—fe2c4—-1928        | -3246.949769 | 67.8 |
| 1640 | 13v-03-DitrapIcos—fe2c4—-2520 | -3246.949756 | 67.9 |
| 1641 | 13v-01-Doc—fe2c4—-1198        | -3246.949737 | 67.9 |
| 1642 | 13v-03-DitrapIcos—fe2c4—-2464 | -3246.949598 | 67.9 |
| 1643 | 13v-03-DitrapIcos—fe2c4—-2154 | -3246.949593 | 68.0 |
| 1644 | 13v-03-DitrapIcos—fe2c4—-2430 | -3246.949591 | 68.0 |
| 1645 | 13v-04-CapHexAnPr—fe2c4—-3213 | -3246.949584 | 68.0 |
| 1646 | 13v-02-Hen—fe2c4—-1298        | -3246.949517 | 68.0 |
| 1647 | 13v-04-CapHexAnPr—fe2c4—-2965 | -3246.949494 | 68.0 |
| 1648 | 13v-02-Hen—fe2c4—-1616        | -3246.94947  | 68.0 |
| 1649 | 13v-03-DitrapIcos—fe2c4—-2081 | -3246.949398 | 68.1 |
| 1650 | 13v-03-DitrapIcos—fe2c4—-2156 | -3246.94937  | 68.1 |
| 1651 | 13v-03-DitrapIcos—fe2c4—-2656 | -3246.949369 | 68.1 |
| 1652 | 13v-02-Hen—fe2c4—-1490        | -3246.949328 | 68.1 |
| 1653 | 13v-04-CapHexAnPr—fe2c4—-3549 | -3246.949209 | 68.2 |
| 1654 | 13v-04-CapHexAnPr—fe2c4—-3402 | -3246.949198 | 68.2 |
| 1655 | 13v-01-Doc—fe2c4—-340         | -3246.949127 | 68.2 |
| 1656 | 13v-01-Doc—fe2c4—-365         | -3246.949104 | 68.3 |
| 1657 | 13v-01-Doc—fe2c4—-430         | -3246.949078 | 68.3 |
| 1658 | 13v-03-DitrapIcos—fe2c4—-2747 | -3246.949057 | 68.3 |
| 1659 | 13v-04-CapHexAnPr—fe2c4—-3002 | -3246.949018 | 68.3 |
| 1660 | 13v-03-DitrapIcos—fe2c4—-2755 | -3246.948999 | 68.3 |
| 1661 | 13v-01-Doc—fe2c4—-665         | -3246.948996 | 68.3 |
| 1662 | 13v-03-DitrapIcos—fe2c4—-2392 | -3246.948978 | 68.3 |
| 1663 | 13v-03-DitrapIcos—fe2c4—-2543 | -3246.948954 | 68.4 |
| 1664 | 13v-01-Doc—fe2c4—-681         | -3246.948935 | 68.4 |
| 1665 | 13v-01-Doc—fe2c4—-786         | -3246.94889  | 68.4 |
| 1666 | 13v-01-Doc—fe2c4—-616         | -3246.948822 | 68.4 |
| 1667 | 13v-01-Doc—fe2c4—-1292        | -3246.948801 | 68.4 |
| 1668 | 13v-01-Doc—fe2c4—-1238        | -3246.948739 | 68.5 |
| 1669 | 13v-02-Hen—fe2c4—-1853        | -3246.948592 | 68.6 |
| 1670 | 13v-02-Hen—fe2c4—-2052        | -3246.948581 | 68.6 |
| 1671 | 13v-03-DitrapIcos—fe2c4—-2801 | -3246.948565 | 68.6 |
| 1672 | 13v-04-CapHexAnPr—fe2c4—-3237 | -3246.94852  | 68.6 |
| 1673 | 13v-01-Doc—fe2c4—-1119        | -3246.948481 | 68.7 |
| 1674 | 13v-01-Doc—fe2c4—-141         | -3246.948412 | 68.7 |
| 1675 | 13v-01-Doc—fe2c4—-817         | -3246.948407 | 68.7 |
| 1676 | 13v-02-Hen—fe2c4—-1595        | -3246.948361 | 68.7 |
| 1677 | 13v-01-Doc—fe2c4—-1010        | -3246.948344 | 68.7 |
| 1678 | 13v-01-Doc—fe2c4—-734         | -3246.94832  | 68.8 |
| 1679 | 13v-01-Doc—fe2c4—-102         | -3246.948318 | 68.8 |
| 1680 | 13v-04-CapHexAnPr—fe2c4—-3185 | -3246.94831  | 68.8 |



|      |                              |              |      |
|------|------------------------------|--------------|------|
| 1681 | 13v-02-Hen—fe2c4—1382        | -3246.948295 | 68.8 |
| 1682 | 13v-01-Doc—fe2c4—9           | -3246.948213 | 68.8 |
| 1683 | 13v-04-CapHexAnPr—fe2c4—3220 | -3246.948209 | 68.8 |
| 1684 | 13v-01-Doc—fe2c4—230         | -3246.948205 | 68.8 |
| 1685 | 13v-01-Doc—fe2c4—964         | -3246.948174 | 68.8 |
| 1686 | 13v-03-DitrapIcos—fe2c4—2465 | -3246.948151 | 68.9 |
| 1687 | 13v-02-Hen—fe2c4—1790        | -3246.948106 | 68.9 |
| 1688 | 13v-04-CapHexAnPr—fe2c4—3569 | -3246.948097 | 68.9 |
| 1689 | 13v-03-DitrapIcos—fe2c4—2448 | -3246.948089 | 68.9 |
| 1690 | 13v-02-Hen—fe2c4—1392        | -3246.948087 | 68.9 |
| 1691 | 13v-02-Hen—fe2c4—1641        | -3246.948077 | 68.9 |
| 1692 | 13v-01-Doc—fe2c4—100         | -3246.948025 | 68.9 |
| 1693 | 13v-04-CapHexAnPr—fe2c4—3358 | -3246.948022 | 68.9 |
| 1694 | 13v-01-Doc—fe2c4—1285        | -3246.947956 | 69.0 |
| 1695 | 13v-02-Hen—fe2c4—1753        | -3246.947832 | 69.1 |
| 1696 | 13v-01-Doc—fe2c4—938         | -3246.947812 | 69.1 |
| 1697 | 13v-03-DitrapIcos—fe2c4—2536 | -3246.947792 | 69.1 |
| 1698 | 13v-01-Doc—fe2c4—263         | -3246.947789 | 69.1 |
| 1699 | 13v-04-CapHexAnPr—fe2c4—2947 | -3246.947781 | 69.1 |
| 1700 | 13v-02-Hen—fe2c4—1728        | -3246.947722 | 69.1 |
| 1701 | 13v-03-DitrapIcos—fe2c4—2311 | -3246.947701 | 69.1 |
| 1702 | 13v-02-Hen—fe2c4—1514        | -3246.947697 | 69.1 |
| 1703 | 13v-03-DitrapIcos—fe2c4—2661 | -3246.947671 | 69.2 |
| 1704 | 13v-04-CapHexAnPr—fe2c4—3151 | -3246.947621 | 69.2 |
| 1705 | 13v-02-Hen—fe2c4—1299        | -3246.947576 | 69.2 |
| 1706 | 13v-03-DitrapIcos—fe2c4—2517 | -3246.947536 | 69.2 |
| 1707 | 13v-01-Doc—fe2c4—237         | -3246.947484 | 69.3 |
| 1708 | 13v-02-Hen—fe2c4—1714        | -3246.947458 | 69.3 |
| 1709 | 13v-02-Hen—fe2c4—1818        | -3246.947443 | 69.3 |
| 1710 | 13v-02-Hen—fe2c4—1663        | -3246.947414 | 69.3 |
| 1711 | 13v-02-Hen—fe2c4—1436        | -3246.947367 | 69.3 |
| 1712 | 13v-04-CapHexAnPr—fe2c4—3487 | -3246.947349 | 69.4 |
| 1713 | 13v-04-CapHexAnPr—fe2c4—3432 | -3246.947338 | 69.4 |
| 1714 | 13v-03-DitrapIcos—fe2c4—2409 | -3246.947317 | 69.4 |
| 1715 | 13v-01-Doc—fe2c4—413         | -3246.947306 | 69.4 |
| 1716 | 13v-03-DitrapIcos—fe2c4—2825 | -3246.947257 | 69.4 |
| 1717 | 13v-01-Doc—fe2c4—756         | -3246.947054 | 69.5 |
| 1718 | 13v-01-Doc—fe2c4—268         | -3246.947007 | 69.6 |
| 1719 | 13v-01-Doc—fe2c4—657         | -3246.94691  | 69.6 |
| 1720 | 13v-03-DitrapIcos—fe2c4—2713 | -3246.946877 | 69.7 |
| 1721 | 13v-02-Hen—fe2c4—1465        | -3246.946876 | 69.7 |
| 1722 | 13v-01-Doc—fe2c4—1081        | -3246.946858 | 69.7 |
| 1723 | 13v-04-CapHexAnPr—fe2c4—2981 | -3246.946817 | 69.7 |
| 1724 | 13v-04-CapHexAnPr—fe2c4—2957 | -3246.946634 | 69.8 |
| 1725 | 13v-04-CapHexAnPr—fe2c4—3304 | -3246.946626 | 69.8 |
| 1726 | 13v-01-Doc—fe2c4—1218        | -3246.946625 | 69.8 |
| 1727 | 13v-04-CapHexAnPr—fe2c4—2993 | -3246.946603 | 69.8 |
| 1728 | 13v-01-Doc—fe2c4—1277        | -3246.946598 | 69.8 |
| 1729 | 13v-02-Hen—fe2c4—1597        | -3246.946582 | 69.8 |
| 1730 | 13v-01-Doc—fe2c4—574         | -3246.94656  | 69.9 |
| 1731 | 13v-02-Hen—fe2c4—1503        | -3246.946559 | 69.9 |

|      |                              |              |      |
|------|------------------------------|--------------|------|
| 1732 | 13v-01-Doc—fe2c4—371         | -3246.946542 | 69.9 |
| 1733 | 13v-03-DitrapIcos—fe2c4—2397 | -3246.946534 | 69.9 |
| 1734 | 13v-02-Hen—fe2c4—1943        | -3246.946533 | 69.9 |
| 1735 | 13v-02-Hen—fe2c4—1589        | -3246.94653  | 69.9 |
| 1736 | 13v-02-Hen—fe2c4—1366        | -3246.946494 | 69.9 |
| 1737 | 13v-03-DitrapIcos—fe2c4—2196 | -3246.94649  | 69.9 |
| 1738 | 13v-03-DitrapIcos—fe2c4—2469 | -3246.946489 | 69.9 |
| 1739 | 13v-02-Hen—fe2c4—1631        | -3246.94644  | 69.9 |
| 1740 | 13v-04-CapHexAnPr—fe2c4—3244 | -3246.946413 | 69.9 |
| 1741 | 13v-02-Hen—fe2c4—1306        | -3246.946403 | 70.0 |
| 1742 | 13v-03-DitrapIcos—fe2c4—2103 | -3246.94637  | 70.0 |
| 1743 | 13v-04-CapHexAnPr—fe2c4—3221 | -3246.946333 | 70.0 |
| 1744 | 13v-01-Doc—fe2c4—1003        | -3246.946314 | 70.0 |
| 1745 | 13v-02-Hen—fe2c4—1362        | -3246.946288 | 70.0 |
| 1746 | 13v-02-Hen—fe2c4—1361        | -3246.946285 | 70.0 |
| 1747 | 13v-01-Doc—fe2c4—1230        | -3246.94628  | 70.0 |
| 1748 | 13v-01-Doc—fe2c4—1026        | -3246.946273 | 70.0 |
| 1749 | 13v-01-Doc—fe2c4—1051        | -3246.946271 | 70.0 |
| 1750 | 13v-01-Doc—fe2c4—1281        | -3246.946264 | 70.0 |
| 1751 | 13v-01-Doc—fe2c4—935         | -3246.946211 | 70.1 |
| 1752 | 13v-02-Hen—fe2c4—1901        | -3246.946195 | 70.1 |
| 1753 | 13v-02-Hen—fe2c4—2056        | -3246.946183 | 70.1 |
| 1754 | 13v-01-Doc—fe2c4—822         | -3246.946089 | 70.2 |
| 1755 | 13v-01-Doc—fe2c4—382         | -3246.946059 | 70.2 |
| 1756 | 13v-04-CapHexAnPr—fe2c4—3203 | -3246.945814 | 70.3 |
| 1757 | 13v-03-DitrapIcos—fe2c4—2669 | -3246.945808 | 70.3 |
| 1758 | 13v-03-DitrapIcos—fe2c4—2238 | -3246.945786 | 70.3 |
| 1759 | 13v-03-DitrapIcos—fe2c4—2489 | -3246.94576  | 70.4 |
| 1760 | 13v-01-Doc—fe2c4—971         | -3246.945759 | 70.4 |
| 1761 | 13v-02-Hen—fe2c4—1452        | -3246.945746 | 70.4 |
| 1762 | 13v-03-DitrapIcos—fe2c4—2304 | -3246.945739 | 70.4 |
| 1763 | 13v-04-CapHexAnPr—fe2c4—3127 | -3246.94573  | 70.4 |
| 1764 | 13v-04-CapHexAnPr—fe2c4—3556 | -3246.945719 | 70.4 |
| 1765 | 13v-02-Hen—fe2c4—1522        | -3246.945705 | 70.4 |
| 1766 | 13v-03-DitrapIcos—fe2c4—2306 | -3246.945701 | 70.4 |
| 1767 | 13v-02-Hen—fe2c4—1433        | -3246.945694 | 70.4 |
| 1768 | 13v-04-CapHexAnPr—fe2c4—3491 | -3246.945684 | 70.4 |
| 1769 | 13v-02-Hen—fe2c4—1420        | -3246.945678 | 70.4 |
| 1770 | 13v-02-Hen—fe2c4—1609        | -3246.945653 | 70.4 |
| 1771 | 13v-04-CapHexAnPr—fe2c4—3263 | -3246.945632 | 70.4 |
| 1772 | 13v-02-Hen—fe2c4—1297        | -3246.945597 | 70.5 |
| 1773 | 13v-03-DitrapIcos—fe2c4—2232 | -3246.945594 | 70.5 |
| 1774 | 13v-03-DitrapIcos—fe2c4—2326 | -3246.945573 | 70.5 |
| 1775 | 13v-02-Hen—fe2c4—1797        | -3246.945537 | 70.5 |
| 1776 | 13v-04-CapHexAnPr—fe2c4—3531 | -3246.945511 | 70.5 |
| 1777 | 13v-04-CapHexAnPr—fe2c4—3159 | -3246.945486 | 70.5 |
| 1778 | 13v-01-Doc—fe2c4—228         | -3246.94545  | 70.6 |
| 1779 | 13v-01-Doc—fe2c4—363         | -3246.94539  | 70.6 |
| 1780 | 13v-01-Doc—fe2c4—913         | -3246.945363 | 70.6 |
| 1781 | 13v-03-DitrapIcos—fe2c4—2382 | -3246.945242 | 70.7 |
| 1782 | 13v-02-Hen—fe2c4—1896        | -3246.945225 | 70.7 |

|      |                              |              |      |
|------|------------------------------|--------------|------|
| 1783 | 13v-01-Doc—fe2c4—194         | -3246.94511  | 70.8 |
| 1784 | 13v-01-Doc—fe2c4—125         | -3246.94506  | 70.8 |
| 1785 | 13v-01-Doc—fe2c4—154         | -3246.945047 | 70.8 |
| 1786 | 13v-03-DitrapIcos—fe2c4—2418 | -3246.944967 | 70.9 |
| 1787 | 13v-03-DitrapIcos—fe2c4—2505 | -3246.944946 | 70.9 |
| 1788 | 13v-03-DitrapIcos—fe2c4—2295 | -3246.944911 | 70.9 |
| 1789 | 13v-01-Doc—fe2c4—308         | -3246.94487  | 70.9 |
| 1790 | 13v-03-DitrapIcos—fe2c4—2226 | -3246.944849 | 70.9 |
| 1791 | 13v-02-Hen—fe2c4—1923        | -3246.944842 | 70.9 |
| 1792 | 13v-04-CapHexAnPr—fe2c4—2963 | -3246.94483  | 70.9 |
| 1793 | 13v-01-Doc—fe2c4—227         | -3246.944801 | 71.0 |
| 1794 | 13v-01-Doc—fe2c4—597         | -3246.944793 | 71.0 |
| 1795 | 13v-01-Doc—fe2c4—829         | -3246.944769 | 71.0 |
| 1796 | 13v-03-DitrapIcos—fe2c4—2385 | -3246.944739 | 71.0 |
| 1797 | 13v-03-DitrapIcos—fe2c4—2677 | -3246.944737 | 71.0 |
| 1798 | 13v-03-DitrapIcos—fe2c4—2522 | -3246.944734 | 71.0 |
| 1799 | 13v-01-Doc—fe2c4—27          | -3246.944658 | 71.0 |
| 1800 | 13v-02-Hen—fe2c4—1380        | -3246.94462  | 71.1 |
| 1801 | 13v-03-DitrapIcos—fe2c4—2106 | -3246.944619 | 71.1 |
| 1802 | 13v-02-Hen—fe2c4—1960        | -3246.944616 | 71.1 |
| 1803 | 13v-01-Doc—fe2c4—1273        | -3246.944541 | 71.1 |
| 1804 | 13v-01-Doc—fe2c4—290         | -3246.944533 | 71.1 |
| 1805 | 13v-04-CapHexAnPr—fe2c4—3505 | -3246.944522 | 71.1 |
| 1806 | 13v-01-Doc—fe2c4—387         | -3246.944498 | 71.2 |
| 1807 | 13v-01-Doc—fe2c4—279         | -3246.944487 | 71.2 |
| 1808 | 13v-04-CapHexAnPr—fe2c4—3347 | -3246.944482 | 71.2 |
| 1809 | 13v-01-Doc—fe2c4—217         | -3246.944481 | 71.2 |
| 1810 | 13v-01-Doc—fe2c4—513         | -3246.94442  | 71.2 |
| 1811 | 13v-02-Hen—fe2c4—1622        | -3246.944401 | 71.2 |
| 1812 | 13v-01-Doc—fe2c4—206         | -3246.944372 | 71.2 |
| 1813 | 13v-04-CapHexAnPr—fe2c4—3395 | -3246.944324 | 71.3 |
| 1814 | 13v-01-Doc—fe2c4—491         | -3246.944303 | 71.3 |
| 1815 | 13v-01-Doc—fe2c4—556         | -3246.9443   | 71.3 |
| 1816 | 13v-01-Doc—fe2c4—490         | -3246.944294 | 71.3 |
| 1817 | 13v-02-Hen—fe2c4—1305        | -3246.944235 | 71.3 |
| 1818 | 13v-02-Hen—fe2c4—1588        | -3246.944232 | 71.3 |
| 1819 | 13v-01-Doc—fe2c4—508         | -3246.944221 | 71.3 |
| 1820 | 13v-03-DitrapIcos—fe2c4—2542 | -3246.944188 | 71.3 |
| 1821 | 13v-01-Doc—fe2c4—811         | -3246.944176 | 71.4 |
| 1822 | 13v-01-Doc—fe2c4—205         | -3246.944151 | 71.4 |
| 1823 | 13v-01-Doc—fe2c4—841         | -3246.94414  | 71.4 |
| 1824 | 13v-01-Doc—fe2c4—745         | -3246.944096 | 71.4 |
| 1825 | 13v-01-Doc—fe2c4—731         | -3246.94404  | 71.4 |
| 1826 | 13v-02-Hen—fe2c4—2009        | -3246.943951 | 71.5 |
| 1827 | 13v-01-Doc—fe2c4—1047        | -3246.94395  | 71.5 |
| 1828 | 13v-01-Doc—fe2c4—31          | -3246.943926 | 71.5 |
| 1829 | 13v-03-DitrapIcos—fe2c4—2565 | -3246.943827 | 71.6 |
| 1830 | 13v-04-CapHexAnPr—fe2c4—3401 | -3246.943799 | 71.6 |
| 1831 | 13v-04-CapHexAnPr—fe2c4—2997 | -3246.943782 | 71.6 |
| 1832 | 13v-01-Doc—fe2c4—929         | -3246.943774 | 71.6 |
| 1833 | 13v-03-DitrapIcos—fe2c4—2221 | -3246.943629 | 71.7 |

|      |                              |              |      |
|------|------------------------------|--------------|------|
| 1834 | 13v-03-DitrapIcos—fe2c4—2228 | -3246.943595 | 71.7 |
| 1835 | 13v-02-Hen—fe2c4—1367        | -3246.943532 | 71.8 |
| 1836 | 13v-03-DitrapIcos—fe2c4—2614 | -3246.943491 | 71.8 |
| 1837 | 13v-01-Doc—fe2c4—1195        | -3246.943388 | 71.8 |
| 1838 | 13v-02-Hen—fe2c4—1983        | -3246.943331 | 71.9 |
| 1839 | 13v-03-DitrapIcos—fe2c4—2800 | -3246.94317  | 72.0 |
| 1840 | 13v-04-CapHexAnPr—fe2c4—2990 | -3246.94315  | 72.0 |
| 1841 | 13v-01-Doc—fe2c4—663         | -3246.943118 | 72.0 |
| 1842 | 13v-04-CapHexAnPr—fe2c4—3012 | -3246.943114 | 72.0 |
| 1843 | 13v-03-DitrapIcos—fe2c4—2337 | -3246.942977 | 72.1 |
| 1844 | 13v-02-Hen—fe2c4—1726        | -3246.94295  | 72.1 |
| 1845 | 13v-02-Hen—fe2c4—1417        | -3246.942879 | 72.2 |
| 1846 | 13v-01-Doc—fe2c4—478         | -3246.942876 | 72.2 |
| 1847 | 13v-04-CapHexAnPr—fe2c4—3550 | -3246.942872 | 72.2 |
| 1848 | 13v-04-CapHexAnPr—fe2c4—3297 | -3246.94286  | 72.2 |
| 1849 | 13v-01-Doc—fe2c4—1092        | -3246.942845 | 72.2 |
| 1850 | 13v-04-CapHexAnPr—fe2c4—3329 | -3246.94282  | 72.2 |
| 1851 | 13v-04-CapHexAnPr—fe2c4—3532 | -3246.942767 | 72.2 |
| 1852 | 13v-02-Hen—fe2c4—1309        | -3246.942763 | 72.2 |
| 1853 | 13v-01-Doc—fe2c4—1122        | -3246.942692 | 72.3 |
| 1854 | 13v-01-Doc—fe2c4—644         | -3246.942675 | 72.3 |
| 1855 | 13v-04-CapHexAnPr—fe2c4—3254 | -3246.942642 | 72.3 |
| 1856 | 13v-03-DitrapIcos—fe2c4—2488 | -3246.942612 | 72.3 |
| 1857 | 13v-03-DitrapIcos—fe2c4—2754 | -3246.942607 | 72.3 |
| 1858 | 13v-03-DitrapIcos—fe2c4—2492 | -3246.942513 | 72.4 |
| 1859 | 13v-02-Hen—fe2c4—1758        | -3246.942467 | 72.4 |
| 1860 | 13v-04-CapHexAnPr—fe2c4—3372 | -3246.942354 | 72.5 |
| 1861 | 13v-04-CapHexAnPr—fe2c4—3584 | -3246.942335 | 72.5 |
| 1862 | 13v-01-Doc—fe2c4—695         | -3246.942103 | 72.7 |
| 1863 | 13v-02-Hen—fe2c4—1837        | -3246.942099 | 72.7 |
| 1864 | 13v-02-Hen—fe2c4—1844        | -3246.942086 | 72.7 |
| 1865 | 13v-01-Doc—fe2c4—907         | -3246.942085 | 72.7 |
| 1866 | 13v-01-Doc—fe2c4—838         | -3246.942031 | 72.7 |
| 1867 | 13v-01-Doc—fe2c4—337         | -3246.942013 | 72.7 |
| 1868 | 13v-01-Doc—fe2c4—45          | -3246.942009 | 72.7 |
| 1869 | 13v-02-Hen—fe2c4—1864        | -3246.942004 | 72.7 |
| 1870 | 13v-02-Hen—fe2c4—2004        | -3246.941832 | 72.8 |
| 1871 | 13v-01-Doc—fe2c4—757         | -3246.941831 | 72.8 |
| 1872 | 13v-04-CapHexAnPr—fe2c4—2987 | -3246.941825 | 72.8 |
| 1873 | 13v-02-Hen—fe2c4—1757        | -3246.941804 | 72.8 |
| 1874 | 13v-04-CapHexAnPr—fe2c4—3407 | -3246.9417   | 72.9 |
| 1875 | 13v-04-CapHexAnPr—fe2c4—2906 | -3246.941672 | 72.9 |
| 1876 | 13v-01-Doc—fe2c4—567         | -3246.941666 | 72.9 |
| 1877 | 13v-01-Doc—fe2c4—1058        | -3246.941636 | 72.9 |
| 1878 | 13v-04-CapHexAnPr—fe2c4—3564 | -3246.941599 | 73.0 |
| 1879 | 13v-03-DitrapIcos—fe2c4—2293 | -3246.941566 | 73.0 |
| 1880 | 13v-01-Doc—fe2c4—143         | -3246.9415   | 73.0 |
| 1881 | 13v-02-Hen—fe2c4—1625        | -3246.941479 | 73.0 |
| 1882 | 13v-01-Doc—fe2c4—349         | -3246.941443 | 73.1 |
| 1883 | 13v-03-DitrapIcos—fe2c4—2625 | -3246.941407 | 73.1 |
| 1884 | 13v-01-Doc—fe2c4—1165        | -3246.941136 | 73.3 |

|      |                              |              |      |
|------|------------------------------|--------------|------|
| 1885 | 13v-01-Doc—fe2c4—988         | -3246.94113  | 73.3 |
| 1886 | 13v-03-DitrapIcos—fe2c4—2807 | -3246.941123 | 73.3 |
| 1887 | 13v-04-CapHexAnPr—fe2c4—3365 | -3246.940984 | 73.4 |
| 1888 | 13v-02-Hen—fe2c4—1303        | -3246.940938 | 73.4 |
| 1889 | 13v-02-Hen—fe2c4—1405        | -3246.940898 | 73.4 |
| 1890 | 13v-02-Hen—fe2c4—1799        | -3246.940884 | 73.4 |
| 1891 | 13v-03-DitrapIcos—fe2c4—2432 | -3246.940803 | 73.5 |
| 1892 | 13v-01-Doc—fe2c4—1076        | -3246.940762 | 73.5 |
| 1893 | 13v-04-CapHexAnPr—fe2c4—3004 | -3246.940761 | 73.5 |
| 1894 | 13v-02-Hen—fe2c4—1478        | -3246.940721 | 73.5 |
| 1895 | 13v-01-Doc—fe2c4—1062        | -3246.94072  | 73.5 |
| 1896 | 13v-02-Hen—fe2c4—1768        | -3246.940656 | 73.6 |
| 1897 | 13v-04-CapHexAnPr—fe2c4—3541 | -3246.940573 | 73.6 |
| 1898 | 13v-04-CapHexAnPr—fe2c4—3350 | -3246.940479 | 73.7 |
| 1899 | 13v-04-CapHexAnPr—fe2c4—3446 | -3246.940292 | 73.8 |
| 1900 | 13v-04-CapHexAnPr—fe2c4—3362 | -3246.940255 | 73.8 |
| 1901 | 13v-02-Hen—fe2c4—2011        | -3246.940221 | 73.8 |
| 1902 | 13v-02-Hen—fe2c4—1745        | -3246.940178 | 73.9 |
| 1903 | 13v-02-Hen—fe2c4—1511        | -3246.940142 | 73.9 |
| 1904 | 13v-02-Hen—fe2c4—1413        | -3246.940107 | 73.9 |
| 1905 | 13v-03-DitrapIcos—fe2c4—2143 | -3246.940096 | 73.9 |
| 1906 | 13v-03-DitrapIcos—fe2c4—2629 | -3246.94008  | 73.9 |
| 1907 | 13v-03-DitrapIcos—fe2c4—2559 | -3246.939961 | 74.0 |
| 1908 | 13v-01-Doc—fe2c4—400         | -3246.939953 | 74.0 |
| 1909 | 13v-01-Doc—fe2c4—892         | -3246.939824 | 74.1 |
| 1910 | 13v-04-CapHexAnPr—fe2c4—3371 | -3246.939783 | 74.1 |
| 1911 | 13v-04-CapHexAnPr—fe2c4—2967 | -3246.939781 | 74.1 |
| 1912 | 13v-01-Doc—fe2c4—343         | -3246.939643 | 74.2 |
| 1913 | 13v-03-DitrapIcos—fe2c4—2797 | -3246.939597 | 74.2 |
| 1914 | 13v-02-Hen—fe2c4—1873        | -3246.939596 | 74.2 |
| 1915 | 13v-01-Doc—fe2c4—132         | -3246.939591 | 74.2 |
| 1916 | 13v-03-DitrapIcos—fe2c4—2364 | -3246.939569 | 74.2 |
| 1917 | 13v-04-CapHexAnPr—fe2c4—2970 | -3246.939549 | 74.3 |
| 1918 | 13v-03-DitrapIcos—fe2c4—2099 | -3246.939486 | 74.3 |
| 1919 | 13v-04-CapHexAnPr—fe2c4—3340 | -3246.939486 | 74.3 |
| 1920 | 13v-03-DitrapIcos—fe2c4—2100 | -3246.93947  | 74.3 |
| 1921 | 13v-03-DitrapIcos—fe2c4—2163 | -3246.939443 | 74.3 |
| 1922 | 13v-04-CapHexAnPr—fe2c4—3011 | -3246.939435 | 74.3 |
| 1923 | 13v-04-CapHexAnPr—fe2c4—3181 | -3246.939388 | 74.4 |
| 1924 | 13v-02-Hen—fe2c4—1469        | -3246.93934  | 74.4 |
| 1925 | 13v-04-CapHexAnPr—fe2c4—3288 | -3246.939338 | 74.4 |
| 1926 | 13v-03-DitrapIcos—fe2c4—2088 | -3246.939312 | 74.4 |
| 1927 | 13v-04-CapHexAnPr—fe2c4—3214 | -3246.939308 | 74.4 |
| 1928 | 13v-03-DitrapIcos—fe2c4—2744 | -3246.93927  | 74.4 |
| 1929 | 13v-01-Doc—fe2c4—1006        | -3246.939229 | 74.5 |
| 1930 | 13v-04-CapHexAnPr—fe2c4—3354 | -3246.939223 | 74.5 |
| 1931 | 13v-03-DitrapIcos—fe2c4—2233 | -3246.939219 | 74.5 |
| 1932 | 13v-04-CapHexAnPr—fe2c4—3136 | -3246.939201 | 74.5 |
| 1933 | 13v-02-Hen—fe2c4—1548        | -3246.93918  | 74.5 |
| 1934 | 13v-04-CapHexAnPr—fe2c4—3180 | -3246.939141 | 74.5 |
| 1935 | 13v-01-Doc—fe2c4—22          | -3246.939061 | 74.6 |

|      |                              |              |      |
|------|------------------------------|--------------|------|
| 1936 | 13v-04-CapHexAnPr—fe2c4—3506 | -3246.939038 | 74.6 |
| 1937 | 13v-03-DitrapIcos—fe2c4—2798 | -3246.939029 | 74.6 |
| 1938 | 13v-04-CapHexAnPr—fe2c4—3238 | -3246.938951 | 74.6 |
| 1939 | 13v-03-DitrapIcos—fe2c4—2684 | -3246.93872  | 74.8 |
| 1940 | 13v-04-CapHexAnPr—fe2c4—3560 | -3246.938689 | 74.8 |
| 1941 | 13v-01-Doc—fe2c4—113         | -3246.938669 | 74.8 |
| 1942 | 13v-02-Hen—fe2c4—1755        | -3246.938628 | 74.8 |
| 1943 | 13v-01-Doc—fe2c4—1063        | -3246.938622 | 74.8 |
| 1944 | 13v-01-Doc—fe2c4—845         | -3246.938601 | 74.9 |
| 1945 | 13v-03-DitrapIcos—fe2c4—2746 | -3246.938536 | 74.9 |
| 1946 | 13v-04-CapHexAnPr—fe2c4—2964 | -3246.938491 | 74.9 |
| 1947 | 13v-04-CapHexAnPr—fe2c4—3014 | -3246.938482 | 74.9 |
| 1948 | 13v-01-Doc—fe2c4—1022        | -3246.938429 | 75.0 |
| 1949 | 13v-02-Hen—fe2c4—1353        | -3246.938403 | 75.0 |
| 1950 | 13v-04-CapHexAnPr—fe2c4—3442 | -3246.938386 | 75.0 |
| 1951 | 13v-03-DitrapIcos—fe2c4—2880 | -3246.938337 | 75.0 |
| 1952 | 13v-02-Hen—fe2c4—1750        | -3246.938311 | 75.0 |
| 1953 | 13v-01-Doc—fe2c4—1021        | -3246.93828  | 75.1 |
| 1954 | 13v-01-Doc—fe2c4—1179        | -3246.938242 | 75.1 |
| 1955 | 13v-03-DitrapIcos—fe2c4—2732 | -3246.938214 | 75.1 |
| 1956 | 13v-03-DitrapIcos—fe2c4—2597 | -3246.938207 | 75.1 |
| 1957 | 13v-04-CapHexAnPr—fe2c4—3480 | -3246.938143 | 75.1 |
| 1958 | 13v-03-DitrapIcos—fe2c4—2122 | -3246.938135 | 75.1 |
| 1959 | 13v-02-Hen—fe2c4—1476        | -3246.938064 | 75.2 |
| 1960 | 13v-01-Doc—fe2c4—590         | -3246.937872 | 75.3 |
| 1961 | 13v-01-Doc—fe2c4—688         | -3246.937848 | 75.3 |
| 1962 | 13v-01-Doc—fe2c4—788         | -3246.937822 | 75.3 |
| 1963 | 13v-03-DitrapIcos—fe2c4—2501 | -3246.937812 | 75.3 |
| 1964 | 13v-01-Doc—fe2c4—1221        | -3246.937775 | 75.4 |
| 1965 | 13v-04-CapHexAnPr—fe2c4—3300 | -3246.937767 | 75.4 |
| 1966 | 13v-03-DitrapIcos—fe2c4—2379 | -3246.937679 | 75.4 |
| 1967 | 13v-04-CapHexAnPr—fe2c4—3166 | -3246.937597 | 75.5 |
| 1968 | 13v-04-CapHexAnPr—fe2c4—3450 | -3246.937596 | 75.5 |
| 1969 | 13v-03-DitrapIcos—fe2c4—2848 | -3246.937572 | 75.5 |
| 1970 | 13v-04-CapHexAnPr—fe2c4—3428 | -3246.937561 | 75.5 |
| 1971 | 13v-02-Hen—fe2c4—1921        | -3246.937489 | 75.5 |
| 1972 | 13v-04-CapHexAnPr—fe2c4—3158 | -3246.937407 | 75.6 |
| 1973 | 13v-04-CapHexAnPr—fe2c4—3396 | -3246.937332 | 75.6 |
| 1974 | 13v-01-Doc—fe2c4—49          | -3246.937329 | 75.6 |
| 1975 | 13v-01-Doc—fe2c4—834         | -3246.937318 | 75.7 |
| 1976 | 13v-02-Hen—fe2c4—1573        | -3246.937315 | 75.7 |
| 1977 | 13v-03-DitrapIcos—fe2c4—2377 | -3246.937266 | 75.7 |
| 1978 | 13v-01-Doc—fe2c4—84          | -3246.937158 | 75.8 |
| 1979 | 13v-01-Doc—fe2c4—1042        | -3246.93713  | 75.8 |
| 1980 | 13v-03-DitrapIcos—fe2c4—2731 | -3246.937087 | 75.8 |
| 1981 | 13v-03-DitrapIcos—fe2c4—2612 | -3246.937055 | 75.8 |
| 1982 | 13v-01-Doc—fe2c4—200         | -3246.937035 | 75.8 |
| 1983 | 13v-03-DitrapIcos—fe2c4—2726 | -3246.937025 | 75.8 |
| 1984 | 13v-02-Hen—fe2c4—1709        | -3246.936977 | 75.9 |
| 1985 | 13v-01-Doc—fe2c4—1064        | -3246.936924 | 75.9 |
| 1986 | 13v-02-Hen—fe2c4—2046        | -3246.936885 | 75.9 |

|      |                              |              |      |
|------|------------------------------|--------------|------|
| 1987 | 13v-01-Doc—fe2c4—1217        | -3246.936868 | 75.9 |
| 1988 | 13v-02-Hen—fe2c4—1639        | -3246.936858 | 75.9 |
| 1989 | 13v-03-DitrapIcos—fe2c4—2759 | -3246.936841 | 76.0 |
| 1990 | 13v-03-DitrapIcos—fe2c4—2471 | -3246.936754 | 76.0 |
| 1991 | 13v-02-Hen—fe2c4—1504        | -3246.936731 | 76.0 |
| 1992 | 13v-02-Hen—fe2c4—2037        | -3246.936723 | 76.0 |
| 1993 | 13v-04-CapHexAnPr—fe2c4—3215 | -3246.936718 | 76.0 |
| 1994 | 13v-03-DitrapIcos—fe2c4—2411 | -3246.936696 | 76.0 |
| 1995 | 13v-01-Doc—fe2c4—5           | -3246.936672 | 76.1 |
| 1996 | 13v-01-Doc—fe2c4—863         | -3246.936625 | 76.1 |
| 1997 | 13v-01-Doc—fe2c4—280         | -3246.93657  | 76.1 |
| 1998 | 13v-02-Hen—fe2c4—1683        | -3246.936548 | 76.1 |
| 1999 | 13v-01-Doc—fe2c4—370         | -3246.936538 | 76.1 |
| 2000 | 13v-03-DitrapIcos—fe2c4—2468 | -3246.936499 | 76.2 |
| 2001 | 13v-03-DitrapIcos—fe2c4—2449 | -3246.936482 | 76.2 |
| 2002 | 13v-01-Doc—fe2c4—385         | -3246.936377 | 76.2 |
| 2003 | 13v-01-Doc—fe2c4—1045        | -3246.936357 | 76.3 |
| 2004 | 13v-01-Doc—fe2c4—210         | -3246.936353 | 76.3 |
| 2005 | 13v-01-Doc—fe2c4—857         | -3246.936332 | 76.3 |
| 2006 | 13v-02-Hen—fe2c4—1955        | -3246.936306 | 76.3 |
| 2007 | 13v-04-CapHexAnPr—fe2c4—3379 | -3246.936261 | 76.3 |
| 2008 | 13v-01-Doc—fe2c4—1137        | -3246.936248 | 76.3 |
| 2009 | 13v-03-DitrapIcos—fe2c4—2376 | -3246.936242 | 76.3 |
| 2010 | 13v-01-Doc—fe2c4—338         | -3246.936216 | 76.3 |
| 2011 | 13v-02-Hen—fe2c4—1552        | -3246.936193 | 76.4 |
| 2012 | 13v-01-Doc—fe2c4—252         | -3246.936192 | 76.4 |
| 2013 | 13v-02-Hen—fe2c4—1518        | -3246.936188 | 76.4 |
| 2014 | 13v-01-Doc—fe2c4—1197        | -3246.93618  | 76.4 |
| 2015 | 13v-04-CapHexAnPr—fe2c4—3363 | -3246.936145 | 76.4 |
| 2016 | 13v-03-DitrapIcos—fe2c4—2626 | -3246.93613  | 76.4 |
| 2017 | 13v-03-DitrapIcos—fe2c4—2619 | -3246.936088 | 76.4 |
| 2018 | 13v-02-Hen—fe2c4—1957        | -3246.936076 | 76.4 |
| 2019 | 13v-03-DitrapIcos—fe2c4—2602 | -3246.936012 | 76.5 |
| 2020 | 13v-01-Doc—fe2c4—1187        | -3246.935939 | 76.5 |
| 2021 | 13v-01-Doc—fe2c4—1189        | -3246.93592  | 76.5 |
| 2022 | 13v-02-Hen—fe2c4—1538        | -3246.935902 | 76.5 |
| 2023 | 13v-04-CapHexAnPr—fe2c4—3361 | -3246.935884 | 76.6 |
| 2024 | 13v-02-Hen—fe2c4—1741        | -3246.935874 | 76.6 |
| 2025 | 13v-01-Doc—fe2c4—591         | -3246.935815 | 76.6 |
| 2026 | 13v-01-Doc—fe2c4—536         | -3246.935793 | 76.6 |
| 2027 | 13v-01-Doc—fe2c4—618         | -3246.935758 | 76.6 |
| 2028 | 13v-02-Hen—fe2c4—1705        | -3246.935743 | 76.6 |
| 2029 | 13v-02-Hen—fe2c4—1925        | -3246.935725 | 76.7 |
| 2030 | 13v-01-Doc—fe2c4—864         | -3246.935618 | 76.7 |
| 2031 | 13v-01-Doc—fe2c4—404         | -3246.935614 | 76.7 |
| 2032 | 13v-01-Doc—fe2c4—456         | -3246.935543 | 76.8 |
| 2033 | 13v-04-CapHexAnPr—fe2c4—3097 | -3246.93552  | 76.8 |
| 2034 | 13v-03-DitrapIcos—fe2c4—2721 | -3246.935515 | 76.8 |
| 2035 | 13v-02-Hen—fe2c4—1814        | -3246.935477 | 76.8 |
| 2036 | 13v-03-DitrapIcos—fe2c4—2575 | -3246.935474 | 76.8 |
| 2037 | 13v-04-CapHexAnPr—fe2c4—3248 | -3246.935449 | 76.8 |

|      |                                |              |      |
|------|--------------------------------|--------------|------|
| 2038 | 13v-04-CapHexAnPr--fe2c4--3122 | -3246.935407 | 76.9 |
| 2039 | 13v-04-CapHexAnPr--fe2c4--3199 | -3246.935295 | 76.9 |
| 2040 | 13v-01-Doc--fe2c4--401         | -3246.935246 | 77.0 |
| 2041 | 13v-02-Hen--fe2c4--1838        | -3246.935181 | 77.0 |
| 2042 | 13v-01-Doc--fe2c4--910         | -3246.935178 | 77.0 |
| 2043 | 13v-04-CapHexAnPr--fe2c4--3570 | -3246.93514  | 77.0 |
| 2044 | 13v-01-Doc--fe2c4--533         | -3246.935091 | 77.1 |
| 2045 | 13v-03-DitrapIcos--fe2c4--2519 | -3246.935075 | 77.1 |
| 2046 | 13v-01-Doc--fe2c4--1087        | -3246.93505  | 77.1 |
| 2047 | 13v-01-Doc--fe2c4--749         | -3246.934999 | 77.1 |
| 2048 | 13v-04-CapHexAnPr--fe2c4--3436 | -3246.934916 | 77.2 |
| 2049 | 13v-01-Doc--fe2c4--419         | -3246.934915 | 77.2 |
| 2050 | 13v-04-CapHexAnPr--fe2c4--3162 | -3246.9349   | 77.2 |
| 2051 | 13v-04-CapHexAnPr--fe2c4--3357 | -3246.934854 | 77.2 |
| 2052 | 13v-01-Doc--fe2c4--600         | -3246.934845 | 77.2 |
| 2053 | 13v-02-Hen--fe2c4--1664        | -3246.934815 | 77.2 |
| 2054 | 13v-01-Doc--fe2c4--840         | -3246.934773 | 77.3 |
| 2055 | 13v-04-CapHexAnPr--fe2c4--3289 | -3246.934764 | 77.3 |
| 2056 | 13v-02-Hen--fe2c4--1648        | -3246.934692 | 77.3 |
| 2057 | 13v-02-Hen--fe2c4--1671        | -3246.934666 | 77.3 |
| 2058 | 13v-04-CapHexAnPr--fe2c4--3314 | -3246.934641 | 77.3 |
| 2059 | 13v-04-CapHexAnPr--fe2c4--3334 | -3246.934636 | 77.3 |
| 2060 | 13v-02-Hen--fe2c4--1809        | -3246.934633 | 77.3 |
| 2061 | 13v-04-CapHexAnPr--fe2c4--3546 | -3246.934617 | 77.4 |
| 2062 | 13v-03-DitrapIcos--fe2c4--2814 | -3246.934569 | 77.4 |
| 2063 | 13v-01-Doc--fe2c4--126         | -3246.934468 | 77.4 |
| 2064 | 13v-02-Hen--fe2c4--1701        | -3246.934457 | 77.5 |
| 2065 | 13v-01-Doc--fe2c4--1057        | -3246.934441 | 77.5 |
| 2066 | 13v-02-Hen--fe2c4--1308        | -3246.934433 | 77.5 |
| 2067 | 13v-01-Doc--fe2c4--293         | -3246.934426 | 77.5 |
| 2068 | 13v-02-Hen--fe2c4--2005        | -3246.934422 | 77.5 |
| 2069 | 13v-04-CapHexAnPr--fe2c4--3343 | -3246.934372 | 77.5 |
| 2070 | 13v-02-Hen--fe2c4--1472        | -3246.934322 | 77.5 |
| 2071 | 13v-04-CapHexAnPr--fe2c4--3571 | -3246.934276 | 77.6 |
| 2072 | 13v-04-CapHexAnPr--fe2c4--3527 | -3246.934237 | 77.6 |
| 2073 | 13v-01-Doc--fe2c4--725         | -3246.934185 | 77.6 |
| 2074 | 13v-01-Doc--fe2c4--1287        | -3246.934177 | 77.6 |
| 2075 | 13v-03-DitrapIcos--fe2c4--2601 | -3246.934125 | 77.7 |
| 2076 | 13v-01-Doc--fe2c4--967         | -3246.934023 | 77.7 |
| 2077 | 13v-04-CapHexAnPr--fe2c4--2909 | -3246.933954 | 77.8 |
| 2078 | 13v-03-DitrapIcos--fe2c4--2299 | -3246.933934 | 77.8 |
| 2079 | 13v-01-Doc--fe2c4--378         | -3246.933864 | 77.8 |
| 2080 | 13v-01-Doc--fe2c4--448         | -3246.933784 | 77.9 |
| 2081 | 13v-02-Hen--fe2c4--2074        | -3246.933779 | 77.9 |
| 2082 | 13v-03-DitrapIcos--fe2c4--2301 | -3246.933775 | 77.9 |
| 2083 | 13v-01-Doc--fe2c4--582         | -3246.933761 | 77.9 |
| 2084 | 13v-04-CapHexAnPr--fe2c4--3426 | -3246.933722 | 77.9 |
| 2085 | 13v-02-Hen--fe2c4--1658        | -3246.933713 | 77.9 |
| 2086 | 13v-01-Doc--fe2c4--769         | -3246.93371  | 77.9 |
| 2087 | 13v-03-DitrapIcos--fe2c4--2864 | -3246.933555 | 78.0 |
| 2088 | 13v-03-DitrapIcos--fe2c4--2874 | -3246.933532 | 78.0 |



|      |                              |              |      |
|------|------------------------------|--------------|------|
| 2089 | 13v-01-Doc—fe2c4—760         | -3246.933512 | 78.0 |
| 2090 | 13v-04-CapHexAnPr—fe2c4—3399 | -3246.933447 | 78.1 |
| 2091 | 13v-01-Doc—fe2c4—1276        | -3246.933401 | 78.1 |
| 2092 | 13v-03-DitrapIcos—fe2c4—2297 | -3246.933393 | 78.1 |
| 2093 | 13v-04-CapHexAnPr—fe2c4—2931 | -3246.933353 | 78.1 |
| 2094 | 13v-01-Doc—fe2c4—369         | -3246.933159 | 78.3 |
| 2095 | 13v-01-Doc—fe2c4—1219        | -3246.933154 | 78.3 |
| 2096 | 13v-01-Doc—fe2c4—1080        | -3246.933125 | 78.3 |
| 2097 | 13v-01-Doc—fe2c4—1225        | -3246.933113 | 78.3 |
| 2098 | 13v-04-CapHexAnPr—fe2c4—3494 | -3246.933035 | 78.3 |
| 2099 | 13v-04-CapHexAnPr—fe2c4—3441 | -3246.933001 | 78.4 |
| 2100 | 13v-01-Doc—fe2c4—906         | -3246.932981 | 78.4 |
| 2101 | 13v-01-Doc—fe2c4—958         | -3246.932981 | 78.4 |
| 2102 | 13v-02-Hen—fe2c4—2076        | -3246.932965 | 78.4 |
| 2103 | 13v-01-Doc—fe2c4—1269        | -3246.932961 | 78.4 |
| 2104 | 13v-01-Doc—fe2c4—631         | -3246.932915 | 78.4 |
| 2105 | 13v-04-CapHexAnPr—fe2c4—3410 | -3246.932866 | 78.4 |
| 2106 | 13v-01-Doc—fe2c4—412         | -3246.93286  | 78.5 |
| 2107 | 13v-01-Doc—fe2c4—876         | -3246.93278  | 78.5 |
| 2108 | 13v-03-DitrapIcos—fe2c4—2659 | -3246.932742 | 78.5 |
| 2109 | 13v-01-Doc—fe2c4—1111        | -3246.932575 | 78.6 |
| 2110 | 13v-02-Hen—fe2c4—1604        | -3246.932537 | 78.7 |
| 2111 | 13v-03-DitrapIcos—fe2c4—2350 | -3246.932511 | 78.7 |
| 2112 | 13v-01-Doc—fe2c4—344         | -3246.932464 | 78.7 |
| 2113 | 13v-02-Hen—fe2c4—1875        | -3246.932413 | 78.7 |
| 2114 | 13v-02-Hen—fe2c4—1549        | -3246.932351 | 78.8 |
| 2115 | 13v-02-Hen—fe2c4—1379        | -3246.932251 | 78.8 |
| 2116 | 13v-01-Doc—fe2c4—528         | -3246.93224  | 78.8 |
| 2117 | 13v-01-Doc—fe2c4—184         | -3246.932238 | 78.8 |
| 2118 | 13v-03-DitrapIcos—fe2c4—2416 | -3246.932225 | 78.9 |
| 2119 | 13v-02-Hen—fe2c4—1591        | -3246.932207 | 78.9 |
| 2120 | 13v-01-Doc—fe2c4—806         | -3246.932205 | 78.9 |
| 2121 | 13v-01-Doc—fe2c4—1173        | -3246.932117 | 78.9 |
| 2122 | 13v-03-DitrapIcos—fe2c4—2406 | -3246.932108 | 78.9 |
| 2123 | 13v-02-Hen—fe2c4—1654        | -3246.932076 | 78.9 |
| 2124 | 13v-01-Doc—fe2c4—565         | -3246.931986 | 79.0 |
| 2125 | 13v-04-CapHexAnPr—fe2c4—3020 | -3246.93193  | 79.0 |
| 2126 | 13v-03-DitrapIcos—fe2c4—2330 | -3246.931925 | 79.0 |
| 2127 | 13v-01-Doc—fe2c4—1200        | -3246.931873 | 79.1 |
| 2128 | 13v-01-Doc—fe2c4—1272        | -3246.931757 | 79.1 |
| 2129 | 13v-03-DitrapIcos—fe2c4—2879 | -3246.93172  | 79.2 |
| 2130 | 13v-03-DitrapIcos—fe2c4—2145 | -3246.931677 | 79.2 |
| 2131 | 13v-03-DitrapIcos—fe2c4—2319 | -3246.931654 | 79.2 |
| 2132 | 13v-04-CapHexAnPr—fe2c4—2950 | -3246.931614 | 79.2 |
| 2133 | 13v-01-Doc—fe2c4—1054        | -3246.931606 | 79.2 |
| 2134 | 13v-04-CapHexAnPr—fe2c4—3537 | -3246.931559 | 79.3 |
| 2135 | 13v-01-Doc—fe2c4—992         | -3246.931538 | 79.3 |
| 2136 | 13v-02-Hen—fe2c4—1487        | -3246.931474 | 79.3 |
| 2137 | 13v-03-DitrapIcos—fe2c4—2160 | -3246.931462 | 79.3 |
| 2138 | 13v-01-Doc—fe2c4—460         | -3246.931442 | 79.3 |
| 2139 | 13v-03-DitrapIcos—fe2c4—2193 | -3246.931434 | 79.3 |

|      |                              |              |      |
|------|------------------------------|--------------|------|
| 2140 | 13v-02-Hen—fe2c4—2041        | -3246.931412 | 79.4 |
| 2141 | 13v-01-Doc—fe2c4—1040        | -3246.93141  | 79.4 |
| 2142 | 13v-01-Doc—fe2c4—1015        | -3246.931364 | 79.4 |
| 2143 | 13v-03-DitrapIcos—fe2c4—2459 | -3246.931329 | 79.4 |
| 2144 | 13v-01-Doc—fe2c4—678         | -3246.93132  | 79.4 |
| 2145 | 13v-01-Doc—fe2c4—1191        | -3246.931303 | 79.4 |
| 2146 | 13v-01-Doc—fe2c4—159         | -3246.931287 | 79.4 |
| 2147 | 13v-04-CapHexAnPr—fe2c4—3554 | -3246.931167 | 79.5 |
| 2148 | 13v-03-DitrapIcos—fe2c4—2856 | -3246.931134 | 79.5 |
| 2149 | 13v-01-Doc—fe2c4—1201        | -3246.931133 | 79.5 |
| 2150 | 13v-01-Doc—fe2c4—858         | -3246.931118 | 79.5 |
| 2151 | 13v-01-Doc—fe2c4—677         | -3246.93109  | 79.6 |
| 2152 | 13v-01-Doc—fe2c4—833         | -3246.931089 | 79.6 |
| 2153 | 13v-01-Doc—fe2c4—893         | -3246.930978 | 79.6 |
| 2154 | 13v-01-Doc—fe2c4—1183        | -3246.930969 | 79.6 |
| 2155 | 13v-01-Doc—fe2c4—34          | -3246.930952 | 79.7 |
| 2156 | 13v-02-Hen—fe2c4—1480        | -3246.930937 | 79.7 |
| 2157 | 13v-03-DitrapIcos—fe2c4—2426 | -3246.930937 | 79.7 |
| 2158 | 13v-01-Doc—fe2c4—1216        | -3246.930926 | 79.7 |
| 2159 | 13v-03-DitrapIcos—fe2c4—2853 | -3246.930898 | 79.7 |
| 2160 | 13v-01-Doc—fe2c4—836         | -3246.930856 | 79.7 |
| 2161 | 13v-01-Doc—fe2c4—24          | -3246.930844 | 79.7 |
| 2162 | 13v-01-Doc—fe2c4—174         | -3246.930823 | 79.7 |
| 2163 | 13v-03-DitrapIcos—fe2c4—2417 | -3246.930794 | 79.7 |
| 2164 | 13v-04-CapHexAnPr—fe2c4—3424 | -3246.930665 | 79.8 |
| 2165 | 13v-02-Hen—fe2c4—1611        | -3246.93065  | 79.8 |
| 2166 | 13v-01-Doc—fe2c4—1246        | -3246.930649 | 79.8 |
| 2167 | 13v-01-Doc—fe2c4—498         | -3246.930489 | 79.9 |
| 2168 | 13v-04-CapHexAnPr—fe2c4—3217 | -3246.930418 | 80.0 |
| 2169 | 13v-03-DitrapIcos—fe2c4—2839 | -3246.930412 | 80.0 |
| 2170 | 13v-01-Doc—fe2c4—1220        | -3246.930373 | 80.0 |
| 2171 | 13v-01-Doc—fe2c4—628         | -3246.930318 | 80.0 |
| 2172 | 13v-01-Doc—fe2c4—563         | -3246.930304 | 80.1 |
| 2173 | 13v-01-Doc—fe2c4—1239        | -3246.930292 | 80.1 |
| 2174 | 13v-03-DitrapIcos—fe2c4—2216 | -3246.930285 | 80.1 |
| 2175 | 13v-03-DitrapIcos—fe2c4—2560 | -3246.930265 | 80.1 |
| 2176 | 13v-03-DitrapIcos—fe2c4—2286 | -3246.930241 | 80.1 |
| 2177 | 13v-01-Doc—fe2c4—109         | -3246.930188 | 80.1 |
| 2178 | 13v-01-Doc—fe2c4—1289        | -3246.93018  | 80.1 |
| 2179 | 13v-04-CapHexAnPr—fe2c4—3027 | -3246.930178 | 80.1 |
| 2180 | 13v-01-Doc—fe2c4—1171        | -3246.930137 | 80.2 |
| 2181 | 13v-01-Doc—fe2c4—701         | -3246.930132 | 80.2 |
| 2182 | 13v-03-DitrapIcos—fe2c4—2434 | -3246.93006  | 80.2 |
| 2183 | 13v-01-Doc—fe2c4—1286        | -3246.930009 | 80.2 |
| 2184 | 13v-02-Hen—fe2c4—1698        | -3246.929976 | 80.3 |
| 2185 | 13v-03-DitrapIcos—fe2c4—2149 | -3246.929931 | 80.3 |
| 2186 | 13v-01-Doc—fe2c4—827         | -3246.929921 | 80.3 |
| 2187 | 13v-03-DitrapIcos—fe2c4—2869 | -3246.929903 | 80.3 |
| 2188 | 13v-02-Hen—fe2c4—1961        | -3246.929891 | 80.3 |
| 2189 | 13v-01-Doc—fe2c4—428         | -3246.92989  | 80.3 |
| 2190 | 13v-04-CapHexAnPr—fe2c4—3230 | -3246.929851 | 80.3 |

|      |                              |              |      |
|------|------------------------------|--------------|------|
| 2191 | 13v-02-Hen—fe2c4—1760        | -3246.92985  | 80.3 |
| 2192 | 13v-01-Doc—fe2c4—814         | -3246.92982  | 80.4 |
| 2193 | 13v-02-Hen—fe2c4—1941        | -3246.929813 | 80.4 |
| 2194 | 13v-03-DitrapIcos—fe2c4—2294 | -3246.92981  | 80.4 |
| 2195 | 13v-01-Doc—fe2c4—1267        | -3246.929785 | 80.4 |
| 2196 | 13v-01-Doc—fe2c4—726         | -3246.92977  | 80.4 |
| 2197 | 13v-02-Hen—fe2c4—1684        | -3246.929765 | 80.4 |
| 2198 | 13v-02-Hen—fe2c4—1584        | -3246.929743 | 80.4 |
| 2199 | 13v-03-DitrapIcos—fe2c4—2886 | -3246.92973  | 80.4 |
| 2200 | 13v-01-Doc—fe2c4—131         | -3246.929722 | 80.4 |
| 2201 | 13v-01-Doc—fe2c4—1070        | -3246.92971  | 80.4 |
| 2202 | 13v-02-Hen—fe2c4—1857        | -3246.929701 | 80.4 |
| 2203 | 13v-03-DitrapIcos—fe2c4—2346 | -3246.929499 | 80.6 |
| 2204 | 13v-04-CapHexAnPr—fe2c4—3056 | -3246.929452 | 80.6 |
| 2205 | 13v-03-DitrapIcos—fe2c4—2130 | -3246.929315 | 80.7 |
| 2206 | 13v-01-Doc—fe2c4—1159        | -3246.929314 | 80.7 |
| 2207 | 13v-04-CapHexAnPr—fe2c4—3425 | -3246.929309 | 80.7 |
| 2208 | 13v-03-DitrapIcos—fe2c4—2485 | -3246.929246 | 80.7 |
| 2209 | 13v-04-CapHexAnPr—fe2c4—3457 | -3246.929212 | 80.7 |
| 2210 | 13v-01-Doc—fe2c4—883         | -3246.929187 | 80.8 |
| 2211 | 13v-01-Doc—fe2c4—730         | -3246.92914  | 80.8 |
| 2212 | 13v-02-Hen—fe2c4—1554        | -3246.929116 | 80.8 |
| 2213 | 13v-02-Hen—fe2c4—1948        | -3246.929104 | 80.8 |
| 2214 | 13v-01-Doc—fe2c4—519         | -3246.929033 | 80.9 |
| 2215 | 13v-03-DitrapIcos—fe2c4—2265 | -3246.929029 | 80.9 |
| 2216 | 13v-01-Doc—fe2c4—524         | -3246.929019 | 80.9 |
| 2217 | 13v-02-Hen—fe2c4—1936        | -3246.928961 | 80.9 |
| 2218 | 13v-04-CapHexAnPr—fe2c4—3468 | -3246.928926 | 80.9 |
| 2219 | 13v-03-DitrapIcos—fe2c4—2507 | -3246.928914 | 80.9 |
| 2220 | 13v-03-DitrapIcos—fe2c4—2475 | -3246.928885 | 80.9 |
| 2221 | 13v-01-Doc—fe2c4—719         | -3246.928882 | 80.9 |
| 2222 | 13v-01-Doc—fe2c4—406         | -3246.92886  | 81.0 |
| 2223 | 13v-01-Doc—fe2c4—587         | -3246.928858 | 81.0 |
| 2224 | 13v-02-Hen—fe2c4—1600        | -3246.928853 | 81.0 |
| 2225 | 13v-01-Doc—fe2c4—503         | -3246.928845 | 81.0 |
| 2226 | 13v-03-DitrapIcos—fe2c4—2496 | -3246.928819 | 81.0 |
| 2227 | 13v-01-Doc—fe2c4—723         | -3246.928811 | 81.0 |
| 2228 | 13v-03-DitrapIcos—fe2c4—2443 | -3246.928758 | 81.0 |
| 2229 | 13v-01-Doc—fe2c4—497         | -3246.928742 | 81.0 |
| 2230 | 13v-01-Doc—fe2c4—1102        | -3246.928598 | 81.1 |
| 2231 | 13v-01-Doc—fe2c4—828         | -3246.928583 | 81.1 |
| 2232 | 13v-03-DitrapIcos—fe2c4—2172 | -3246.928551 | 81.2 |
| 2233 | 13v-01-Doc—fe2c4—77          | -3246.928528 | 81.2 |
| 2234 | 13v-01-Doc—fe2c4—121         | -3246.928525 | 81.2 |
| 2235 | 13v-01-Doc—fe2c4—207         | -3246.928494 | 81.2 |
| 2236 | 13v-01-Doc—fe2c4—1241        | -3246.928455 | 81.2 |
| 2237 | 13v-02-Hen—fe2c4—1934        | -3246.928445 | 81.2 |
| 2238 | 13v-01-Doc—fe2c4—1247        | -3246.928424 | 81.2 |
| 2239 | 13v-02-Hen—fe2c4—1679        | -3246.928424 | 81.2 |
| 2240 | 13v-02-Hen—fe2c4—1348        | -3246.928399 | 81.3 |
| 2241 | 13v-04-CapHexAnPr—fe2c4—3429 | -3246.928389 | 81.3 |

|      |                              |              |      |
|------|------------------------------|--------------|------|
| 2242 | 13v-03-DitrapIcos—fe2c4—2838 | -3246.928279 | 81.3 |
| 2243 | 13v-03-DitrapIcos—fe2c4—2736 | -3246.92824  | 81.4 |
| 2244 | 13v-03-DitrapIcos—fe2c4—2365 | -3246.928238 | 81.4 |
| 2245 | 13v-04-CapHexAnPr—fe2c4—3301 | -3246.928219 | 81.4 |
| 2246 | 13v-01-Doc—fe2c4—160         | -3246.928165 | 81.4 |
| 2247 | 13v-02-Hen—fe2c4—1336        | -3246.928152 | 81.4 |
| 2248 | 13v-03-DitrapIcos—fe2c4—2722 | -3246.928126 | 81.4 |
| 2249 | 13v-03-DitrapIcos—fe2c4—2381 | -3246.92811  | 81.4 |
| 2250 | 13v-04-CapHexAnPr—fe2c4—3530 | -3246.92811  | 81.4 |
| 2251 | 13v-04-CapHexAnPr—fe2c4—3018 | -3246.928109 | 81.4 |
| 2252 | 13v-04-CapHexAnPr—fe2c4—3434 | -3246.9281   | 81.4 |
| 2253 | 13v-04-CapHexAnPr—fe2c4—3523 | -3246.928066 | 81.5 |
| 2254 | 13v-02-Hen—fe2c4—1652        | -3246.928061 | 81.5 |
| 2255 | 13v-02-Hen—fe2c4—1578        | -3246.928056 | 81.5 |
| 2256 | 13v-03-DitrapIcos—fe2c4—2849 | -3246.928045 | 81.5 |
| 2257 | 13v-04-CapHexAnPr—fe2c4—3167 | -3246.928024 | 81.5 |
| 2258 | 13v-03-DitrapIcos—fe2c4—2236 | -3246.928002 | 81.5 |
| 2259 | 13v-01-Doc—fe2c4—610         | -3246.927998 | 81.5 |
| 2260 | 13v-04-CapHexAnPr—fe2c4—3381 | -3246.927832 | 81.6 |
| 2261 | 13v-01-Doc—fe2c4—55          | -3246.927758 | 81.7 |
| 2262 | 13v-04-CapHexAnPr—fe2c4—3386 | -3246.927744 | 81.7 |
| 2263 | 13v-01-Doc—fe2c4—357         | -3246.927711 | 81.7 |
| 2264 | 13v-03-DitrapIcos—fe2c4—2672 | -3246.927675 | 81.7 |
| 2265 | 13v-02-Hen—fe2c4—1599        | -3246.92758  | 81.8 |
| 2266 | 13v-04-CapHexAnPr—fe2c4—2908 | -3246.927552 | 81.8 |
| 2267 | 13v-03-DitrapIcos—fe2c4—2552 | -3246.927549 | 81.8 |
| 2268 | 13v-02-Hen—fe2c4—1876        | -3246.927521 | 81.8 |
| 2269 | 13v-04-CapHexAnPr—fe2c4—2955 | -3246.927478 | 81.8 |
| 2270 | 13v-02-Hen—fe2c4—1505        | -3246.927367 | 81.9 |
| 2271 | 13v-03-DitrapIcos—fe2c4—2688 | -3246.927365 | 81.9 |
| 2272 | 13v-01-Doc—fe2c4—1117        | -3246.927364 | 81.9 |
| 2273 | 13v-01-Doc—fe2c4—675         | -3246.927356 | 81.9 |
| 2274 | 13v-03-DitrapIcos—fe2c4—2714 | -3246.927331 | 81.9 |
| 2275 | 13v-04-CapHexAnPr—fe2c4—3380 | -3246.927312 | 81.9 |
| 2276 | 13v-03-DitrapIcos—fe2c4—2715 | -3246.927296 | 81.9 |
| 2277 | 13v-02-Hen—fe2c4—1805        | -3246.927129 | 82.0 |
| 2278 | 13v-02-Hen—fe2c4—1635        | -3246.927127 | 82.1 |
| 2279 | 13v-04-CapHexAnPr—fe2c4—3224 | -3246.927126 | 82.1 |
| 2280 | 13v-04-CapHexAnPr—fe2c4—3046 | -3246.927108 | 82.1 |
| 2281 | 13v-04-CapHexAnPr—fe2c4—3193 | -3246.927106 | 82.1 |
| 2282 | 13v-03-DitrapIcos—fe2c4—2766 | -3246.926956 | 82.2 |
| 2283 | 13v-04-CapHexAnPr—fe2c4—3400 | -3246.926955 | 82.2 |
| 2284 | 13v-01-Doc—fe2c4—1180        | -3246.926932 | 82.2 |
| 2285 | 13v-04-CapHexAnPr—fe2c4—3051 | -3246.926921 | 82.2 |
| 2286 | 13v-01-Doc—fe2c4—487         | -3246.926887 | 82.2 |
| 2287 | 13v-04-CapHexAnPr—fe2c4—3352 | -3246.926809 | 82.3 |
| 2288 | 13v-04-CapHexAnPr—fe2c4—3422 | -3246.926764 | 82.3 |
| 2289 | 13v-03-DitrapIcos—fe2c4—2571 | -3246.926726 | 82.3 |
| 2290 | 13v-03-DitrapIcos—fe2c4—2198 | -3246.926668 | 82.3 |
| 2291 | 13v-01-Doc—fe2c4—1212        | -3246.926618 | 82.4 |
| 2292 | 13v-01-Doc—fe2c4—1214        | -3246.926568 | 82.4 |

|      |                              |              |      |
|------|------------------------------|--------------|------|
| 2293 | 13v-03-DitrapIcos—fe2c4—2764 | -3246.926564 | 82.4 |
| 2294 | 13v-02-Hen—fe2c4—1804        | -3246.926513 | 82.4 |
| 2295 | 13v-03-DitrapIcos—fe2c4—2339 | -3246.926476 | 82.5 |
| 2296 | 13v-03-DitrapIcos—fe2c4—2237 | -3246.926453 | 82.5 |
| 2297 | 13v-03-DitrapIcos—fe2c4—2498 | -3246.926431 | 82.5 |
| 2298 | 13v-01-Doc—fe2c4—273         | -3246.926381 | 82.5 |
| 2299 | 13v-01-Doc—fe2c4—137         | -3246.926258 | 82.6 |
| 2300 | 13v-01-Doc—fe2c4—1204        | -3246.926198 | 82.6 |
| 2301 | 13v-01-Doc—fe2c4—204         | -3246.926163 | 82.7 |
| 2302 | 13v-02-Hen—fe2c4—1545        | -3246.926157 | 82.7 |
| 2303 | 13v-03-DitrapIcos—fe2c4—2185 | -3246.926136 | 82.7 |
| 2304 | 13v-01-Doc—fe2c4—658         | -3246.926106 | 82.7 |
| 2305 | 13v-02-Hen—fe2c4—1520        | -3246.926075 | 82.7 |
| 2306 | 13v-01-Doc—fe2c4—107         | -3246.925954 | 82.8 |
| 2307 | 13v-03-DitrapIcos—fe2c4—2790 | -3246.925954 | 82.8 |
| 2308 | 13v-01-Doc—fe2c4—702         | -3246.92592  | 82.8 |
| 2309 | 13v-02-Hen—fe2c4—1406        | -3246.925912 | 82.8 |
| 2310 | 13v-02-Hen—fe2c4—1713        | -3246.925907 | 82.8 |
| 2311 | 13v-03-DitrapIcos—fe2c4—2708 | -3246.925892 | 82.8 |
| 2312 | 13v-03-DitrapIcos—fe2c4—2227 | -3246.925888 | 82.8 |
| 2313 | 13v-04-CapHexAnPr—fe2c4—3208 | -3246.925857 | 82.8 |
| 2314 | 13v-03-DitrapIcos—fe2c4—2278 | -3246.925838 | 82.9 |
| 2315 | 13v-01-Doc—fe2c4—564         | -3246.925816 | 82.9 |
| 2316 | 13v-04-CapHexAnPr—fe2c4—3021 | -3246.925609 | 83.0 |
| 2317 | 13v-01-Doc—fe2c4—696         | -3246.925593 | 83.0 |
| 2318 | 13v-01-Doc—fe2c4—287         | -3246.925527 | 83.1 |
| 2319 | 13v-03-DitrapIcos—fe2c4—2555 | -3246.925481 | 83.1 |
| 2320 | 13v-02-Hen—fe2c4—1568        | -3246.92538  | 83.1 |
| 2321 | 13v-01-Doc—fe2c4—554         | -3246.925346 | 83.2 |
| 2322 | 13v-02-Hen—fe2c4—1649        | -3246.925283 | 83.2 |
| 2323 | 13v-01-Doc—fe2c4—798         | -3246.925252 | 83.2 |
| 2324 | 13v-02-Hen—fe2c4—2006        | -3246.925247 | 83.2 |
| 2325 | 13v-04-CapHexAnPr—fe2c4—3219 | -3246.925142 | 83.3 |
| 2326 | 13v-04-CapHexAnPr—fe2c4—3119 | -3246.925133 | 83.3 |
| 2327 | 13v-01-Doc—fe2c4—739         | -3246.925047 | 83.4 |
| 2328 | 13v-03-DitrapIcos—fe2c4—2887 | -3246.925002 | 83.4 |
| 2329 | 13v-01-Doc—fe2c4—766         | -3246.924989 | 83.4 |
| 2330 | 13v-01-Doc—fe2c4—1066        | -3246.924929 | 83.4 |
| 2331 | 13v-01-Doc—fe2c4—1266        | -3246.924901 | 83.4 |
| 2332 | 13v-02-Hen—fe2c4—1396        | -3246.9249   | 83.4 |
| 2333 | 13v-01-Doc—fe2c4—1169        | -3246.924848 | 83.5 |
| 2334 | 13v-04-CapHexAnPr—fe2c4—2978 | -3246.924773 | 83.5 |
| 2335 | 13v-04-CapHexAnPr—fe2c4—3229 | -3246.924676 | 83.6 |
| 2336 | 13v-01-Doc—fe2c4—1188        | -3246.924665 | 83.6 |
| 2337 | 13v-02-Hen—fe2c4—1922        | -3246.924631 | 83.6 |
| 2338 | 13v-01-Doc—fe2c4—896         | -3246.924578 | 83.7 |
| 2339 | 13v-04-CapHexAnPr—fe2c4—3274 | -3246.924474 | 83.7 |
| 2340 | 13v-04-CapHexAnPr—fe2c4—3414 | -3246.924431 | 83.7 |
| 2341 | 13v-01-Doc—fe2c4—1091        | -3246.92438  | 83.8 |
| 2342 | 13v-03-DitrapIcos—fe2c4—2225 | -3246.924377 | 83.8 |
| 2343 | 13v-01-Doc—fe2c4—449         | -3246.924366 | 83.8 |

|      |                                |              |      |
|------|--------------------------------|--------------|------|
| 2344 | 13v-04-CapHexAnPr--fe2c4--2896 | -3246.924354 | 83.8 |
| 2345 | 13v-02-Hen--fe2c4--1443        | -3246.924302 | 83.8 |
| 2346 | 13v-04-CapHexAnPr--fe2c4--3212 | -3246.924293 | 83.8 |
| 2347 | 13v-01-Doc--fe2c4--238         | -3246.92429  | 83.8 |
| 2348 | 13v-03-DitrapIcos--fe2c4--2206 | -3246.924288 | 83.8 |
| 2349 | 13v-01-Doc--fe2c4--152         | -3246.924283 | 83.8 |
| 2350 | 13v-01-Doc--fe2c4--116         | -3246.92427  | 83.8 |
| 2351 | 13v-04-CapHexAnPr--fe2c4--3378 | -3246.92425  | 83.9 |
| 2352 | 13v-02-Hen--fe2c4--2012        | -3246.924231 | 83.9 |
| 2353 | 13v-02-Hen--fe2c4--1462        | -3246.924208 | 83.9 |
| 2354 | 13v-01-Doc--fe2c4--198         | -3246.924169 | 83.9 |
| 2355 | 13v-04-CapHexAnPr--fe2c4--3467 | -3246.924118 | 83.9 |
| 2356 | 13v-04-CapHexAnPr--fe2c4--3341 | -3246.924052 | 84.0 |
| 2357 | 13v-03-DitrapIcos--fe2c4--2758 | -3246.924041 | 84.0 |
| 2358 | 13v-04-CapHexAnPr--fe2c4--3535 | -3246.92404  | 84.0 |
| 2359 | 13v-04-CapHexAnPr--fe2c4--3553 | -3246.92399  | 84.0 |
| 2360 | 13v-01-Doc--fe2c4--611         | -3246.923961 | 84.0 |
| 2361 | 13v-01-Doc--fe2c4--1167        | -3246.92396  | 84.0 |
| 2362 | 13v-04-CapHexAnPr--fe2c4--2894 | -3246.923959 | 84.0 |
| 2363 | 13v-01-Doc--fe2c4--1259        | -3246.92394  | 84.1 |
| 2364 | 13v-01-Doc--fe2c4--307         | -3246.92393  | 84.1 |
| 2365 | 13v-03-DitrapIcos--fe2c4--2455 | -3246.923879 | 84.1 |
| 2366 | 13v-01-Doc--fe2c4--1260        | -3246.923849 | 84.1 |
| 2367 | 13v-03-DitrapIcos--fe2c4--2440 | -3246.923833 | 84.1 |
| 2368 | 13v-02-Hen--fe2c4--1897        | -3246.923817 | 84.1 |
| 2369 | 13v-03-DitrapIcos--fe2c4--2171 | -3246.923816 | 84.1 |
| 2370 | 13v-02-Hen--fe2c4--1594        | -3246.923812 | 84.1 |
| 2371 | 13v-02-Hen--fe2c4--1645        | -3246.923722 | 84.2 |
| 2372 | 13v-01-Doc--fe2c4--1067        | -3246.923694 | 84.2 |
| 2373 | 13v-01-Doc--fe2c4--622         | -3246.923649 | 84.2 |
| 2374 | 13v-01-Doc--fe2c4--374         | -3246.923645 | 84.2 |
| 2375 | 13v-04-CapHexAnPr--fe2c4--3477 | -3246.923621 | 84.3 |
| 2376 | 13v-03-DitrapIcos--fe2c4--2595 | -3246.923616 | 84.3 |
| 2377 | 13v-01-Doc--fe2c4--130         | -3246.9236   | 84.3 |
| 2378 | 13v-01-Doc--fe2c4--425         | -3246.923597 | 84.3 |
| 2379 | 13v-01-Doc--fe2c4--871         | -3246.923554 | 84.3 |
| 2380 | 13v-02-Hen--fe2c4--1610        | -3246.923551 | 84.3 |
| 2381 | 13v-04-CapHexAnPr--fe2c4--2927 | -3246.923542 | 84.3 |
| 2382 | 13v-01-Doc--fe2c4--514         | -3246.923514 | 84.3 |
| 2383 | 13v-01-Doc--fe2c4--117         | -3246.923509 | 84.3 |
| 2384 | 13v-04-CapHexAnPr--fe2c4--3241 | -3246.923504 | 84.3 |
| 2385 | 13v-03-DitrapIcos--fe2c4--2168 | -3246.923488 | 84.3 |
| 2386 | 13v-04-CapHexAnPr--fe2c4--2903 | -3246.923477 | 84.3 |
| 2387 | 13v-02-Hen--fe2c4--1608        | -3246.923424 | 84.4 |
| 2388 | 13v-02-Hen--fe2c4--1672        | -3246.923412 | 84.4 |
| 2389 | 13v-02-Hen--fe2c4--1586        | -3246.923314 | 84.4 |
| 2390 | 13v-03-DitrapIcos--fe2c4--2179 | -3246.923301 | 84.5 |
| 2391 | 13v-02-Hen--fe2c4--1593        | -3246.923288 | 84.5 |
| 2392 | 13v-04-CapHexAnPr--fe2c4--3435 | -3246.923262 | 84.5 |
| 2393 | 13v-04-CapHexAnPr--fe2c4--3093 | -3246.92325  | 84.5 |
| 2394 | 13v-01-Doc--fe2c4--196         | -3246.923208 | 84.5 |

|      |                              |              |      |
|------|------------------------------|--------------|------|
| 2395 | 13v-03-DitrapIcos—fe2c4—2386 | -3246.923198 | 84.5 |
| 2396 | 13v-04-CapHexAnPr—fe2c4—3118 | -3246.923198 | 84.5 |
| 2397 | 13v-04-CapHexAnPr—fe2c4—3286 | -3246.923174 | 84.5 |
| 2398 | 13v-02-Hen—fe2c4—1603        | -3246.923085 | 84.6 |
| 2399 | 13v-03-DitrapIcos—fe2c4—2756 | -3246.923076 | 84.6 |
| 2400 | 13v-02-Hen—fe2c4—1509        | -3246.923024 | 84.6 |
| 2401 | 13v-01-Doc—fe2c4—781         | -3246.923014 | 84.6 |
| 2402 | 13v-01-Doc—fe2c4—221         | -3246.922955 | 84.7 |
| 2403 | 13v-04-CapHexAnPr—fe2c4—3155 | -3246.922948 | 84.7 |
| 2404 | 13v-01-Doc—fe2c4—789         | -3246.922851 | 84.7 |
| 2405 | 13v-03-DitrapIcos—fe2c4—2151 | -3246.922818 | 84.8 |
| 2406 | 13v-02-Hen—fe2c4—1890        | -3246.922693 | 84.8 |
| 2407 | 13v-02-Hen—fe2c4—1359        | -3246.922688 | 84.8 |
| 2408 | 13v-01-Doc—fe2c4—507         | -3246.922662 | 84.9 |
| 2409 | 13v-01-Doc—fe2c4—535         | -3246.922661 | 84.9 |
| 2410 | 13v-01-Doc—fe2c4—552         | -3246.922656 | 84.9 |
| 2411 | 13v-01-Doc—fe2c4—873         | -3246.922517 | 84.9 |
| 2412 | 13v-04-CapHexAnPr—fe2c4—3405 | -3246.922452 | 85.0 |
| 2413 | 13v-01-Doc—fe2c4—256         | -3246.922387 | 85.0 |
| 2414 | 13v-03-DitrapIcos—fe2c4—2296 | -3246.922355 | 85.0 |
| 2415 | 13v-01-Doc—fe2c4—19          | -3246.922306 | 85.1 |
| 2416 | 13v-01-Doc—fe2c4—257         | -3246.922262 | 85.1 |
| 2417 | 13v-04-CapHexAnPr—fe2c4—3375 | -3246.922226 | 85.1 |
| 2418 | 13v-01-Doc—fe2c4—571         | -3246.922216 | 85.1 |
| 2419 | 13v-04-CapHexAnPr—fe2c4—3497 | -3246.921964 | 85.3 |
| 2420 | 13v-01-Doc—fe2c4—43          | -3246.921913 | 85.3 |
| 2421 | 13v-03-DitrapIcos—fe2c4—2863 | -3246.921832 | 85.4 |
| 2422 | 13v-04-CapHexAnPr—fe2c4—3163 | -3246.92175  | 85.4 |
| 2423 | 13v-01-Doc—fe2c4—1163        | -3246.921745 | 85.4 |
| 2424 | 13v-02-Hen—fe2c4—1526        | -3246.921708 | 85.5 |
| 2425 | 13v-04-CapHexAnPr—fe2c4—2930 | -3246.921667 | 85.5 |
| 2426 | 13v-01-Doc—fe2c4—40          | -3246.921622 | 85.5 |
| 2427 | 13v-01-Doc—fe2c4—3           | -3246.921539 | 85.6 |
| 2428 | 13v-04-CapHexAnPr—fe2c4—2912 | -3246.921449 | 85.6 |
| 2429 | 13v-03-DitrapIcos—fe2c4—2150 | -3246.921267 | 85.7 |
| 2430 | 13v-03-DitrapIcos—fe2c4—2506 | -3246.9212   | 85.8 |
| 2431 | 13v-01-Doc—fe2c4—765         | -3246.921198 | 85.8 |
| 2432 | 13v-02-Hen—fe2c4—1486        | -3246.921152 | 85.8 |
| 2433 | 13v-03-DitrapIcos—fe2c4—2796 | -3246.921113 | 85.8 |
| 2434 | 13v-03-DitrapIcos—fe2c4—2623 | -3246.921084 | 85.8 |
| 2435 | 13v-04-CapHexAnPr—fe2c4—3123 | -3246.921044 | 85.9 |
| 2436 | 13v-03-DitrapIcos—fe2c4—2609 | -3246.920948 | 85.9 |
| 2437 | 13v-04-CapHexAnPr—fe2c4—3339 | -3246.920876 | 86.0 |
| 2438 | 13v-03-DitrapIcos—fe2c4—2642 | -3246.920874 | 86.0 |
| 2439 | 13v-03-DitrapIcos—fe2c4—2585 | -3246.92084  | 86.0 |
| 2440 | 13v-02-Hen—fe2c4—1953        | -3246.920802 | 86.0 |
| 2441 | 13v-02-Hen—fe2c4—1378        | -3246.920634 | 86.1 |
| 2442 | 13v-01-Doc—fe2c4—543         | -3246.920633 | 86.1 |
| 2443 | 13v-01-Doc—fe2c4—105         | -3246.920599 | 86.1 |
| 2444 | 13v-02-Hen—fe2c4—1374        | -3246.920582 | 86.2 |
| 2445 | 13v-01-Doc—fe2c4—208         | -3246.920578 | 86.2 |

|      |                              |              |      |
|------|------------------------------|--------------|------|
| 2446 | 13v-01-Doc—fe2c4—465         | -3246.920578 | 86.2 |
| 2447 | 13v-03-DitrapIcos—fe2c4—2191 | -3246.920501 | 86.2 |
| 2448 | 13v-01-Doc—fe2c4—583         | -3246.920487 | 86.2 |
| 2449 | 13v-03-DitrapIcos—fe2c4—2765 | -3246.920474 | 86.2 |
| 2450 | 13v-01-Doc—fe2c4—643         | -3246.920448 | 86.2 |
| 2451 | 13v-03-DitrapIcos—fe2c4—2117 | -3246.920435 | 86.3 |
| 2452 | 13v-04-CapHexAnPr—fe2c4—3153 | -3246.92043  | 86.3 |
| 2453 | 13v-02-Hen—fe2c4—1640        | -3246.920412 | 86.3 |
| 2454 | 13v-03-DitrapIcos—fe2c4—2499 | -3246.920388 | 86.3 |
| 2455 | 13v-01-Doc—fe2c4—606         | -3246.920368 | 86.3 |
| 2456 | 13v-01-Doc—fe2c4—627         | -3246.920359 | 86.3 |
| 2457 | 13v-02-Hen—fe2c4—1358        | -3246.920327 | 86.3 |
| 2458 | 13v-04-CapHexAnPr—fe2c4—3207 | -3246.920315 | 86.3 |
| 2459 | 13v-02-Hen—fe2c4—1845        | -3246.92031  | 86.3 |
| 2460 | 13v-03-DitrapIcos—fe2c4—2529 | -3246.920309 | 86.3 |
| 2461 | 13v-02-Hen—fe2c4—1541        | -3246.920257 | 86.4 |
| 2462 | 13v-04-CapHexAnPr—fe2c4—3243 | -3246.920148 | 86.4 |
| 2463 | 13v-04-CapHexAnPr—fe2c4—3444 | -3246.920098 | 86.5 |
| 2464 | 13v-03-DitrapIcos—fe2c4—2487 | -3246.920084 | 86.5 |
| 2465 | 13v-03-DitrapIcos—fe2c4—2314 | -3246.919978 | 86.5 |
| 2466 | 13v-04-CapHexAnPr—fe2c4—3330 | -3246.919971 | 86.5 |
| 2467 | 13v-03-DitrapIcos—fe2c4—2823 | -3246.919964 | 86.5 |
| 2468 | 13v-04-CapHexAnPr—fe2c4—2945 | -3246.919874 | 86.6 |
| 2469 | 13v-03-DitrapIcos—fe2c4—2511 | -3246.919872 | 86.6 |
| 2470 | 13v-03-DitrapIcos—fe2c4—2308 | -3246.919799 | 86.6 |
| 2471 | 13v-02-Hen—fe2c4—1473        | -3246.91977  | 86.7 |
| 2472 | 13v-04-CapHexAnPr—fe2c4—3488 | -3246.919755 | 86.7 |
| 2473 | 13v-01-Doc—fe2c4—685         | -3246.919681 | 86.7 |
| 2474 | 13v-03-DitrapIcos—fe2c4—2743 | -3246.919618 | 86.8 |
| 2475 | 13v-01-Doc—fe2c4—464         | -3246.919583 | 86.8 |
| 2476 | 13v-03-DitrapIcos—fe2c4—2282 | -3246.919472 | 86.9 |
| 2477 | 13v-02-Hen—fe2c4—1909        | -3246.919399 | 86.9 |
| 2478 | 13v-04-CapHexAnPr—fe2c4—3490 | -3246.919345 | 86.9 |
| 2479 | 13v-04-CapHexAnPr—fe2c4—3557 | -3246.919327 | 86.9 |
| 2480 | 13v-04-CapHexAnPr—fe2c4—2959 | -3246.919312 | 87.0 |
| 2481 | 13v-04-CapHexAnPr—fe2c4—3231 | -3246.9193   | 87.0 |
| 2482 | 13v-01-Doc—fe2c4—515         | -3246.919236 | 87.0 |
| 2483 | 13v-04-CapHexAnPr—fe2c4—3536 | -3246.919155 | 87.1 |
| 2484 | 13v-01-Doc—fe2c4—832         | -3246.919139 | 87.1 |
| 2485 | 13v-02-Hen—fe2c4—1497        | -3246.919065 | 87.1 |
| 2486 | 13v-01-Doc—fe2c4—453         | -3246.919054 | 87.1 |
| 2487 | 13v-04-CapHexAnPr—fe2c4—3154 | -3246.918925 | 87.2 |
| 2488 | 13v-04-CapHexAnPr—fe2c4—3247 | -3246.918898 | 87.2 |
| 2489 | 13v-04-CapHexAnPr—fe2c4—2974 | -3246.918895 | 87.2 |
| 2490 | 13v-04-CapHexAnPr—fe2c4—3409 | -3246.918857 | 87.2 |
| 2491 | 13v-04-CapHexAnPr—fe2c4—3240 | -3246.918808 | 87.3 |
| 2492 | 13v-04-CapHexAnPr—fe2c4—3184 | -3246.918747 | 87.3 |
| 2493 | 13v-04-CapHexAnPr—fe2c4—3218 | -3246.918723 | 87.3 |
| 2494 | 13v-04-CapHexAnPr—fe2c4—3305 | -3246.918704 | 87.3 |
| 2495 | 13v-04-CapHexAnPr—fe2c4—2998 | -3246.918697 | 87.3 |
| 2496 | 13v-04-CapHexAnPr—fe2c4—3406 | -3246.918684 | 87.3 |



|      |                                |              |      |
|------|--------------------------------|--------------|------|
| 2497 | 13v-04-CapHexAnPr--fe2c4--2928 | -3246.918657 | 87.4 |
| 2498 | 13v-02-Hen--fe2c4--1915        | -3246.918608 | 87.4 |
| 2499 | 13v-04-CapHexAnPr--fe2c4--3161 | -3246.918593 | 87.4 |
| 2500 | 13v-04-CapHexAnPr--fe2c4--3566 | -3246.918577 | 87.4 |
| 2501 | 13v-01-Doc--fe2c4--120         | -3246.918561 | 87.4 |
| 2502 | 13v-04-CapHexAnPr--fe2c4--2980 | -3246.918545 | 87.4 |
| 2503 | 13v-03-DitrapIcos--fe2c4--2123 | -3246.918523 | 87.4 |
| 2504 | 13v-01-Doc--fe2c4--1030        | -3246.918502 | 87.5 |
| 2505 | 13v-03-DitrapIcos--fe2c4--2393 | -3246.918491 | 87.5 |
| 2506 | 13v-02-Hen--fe2c4--1524        | -3246.918473 | 87.5 |
| 2507 | 13v-01-Doc--fe2c4--1253        | -3246.918414 | 87.5 |
| 2508 | 13v-02-Hen--fe2c4--1843        | -3246.918394 | 87.5 |
| 2509 | 13v-01-Doc--fe2c4--751         | -3246.918389 | 87.5 |
| 2510 | 13v-04-CapHexAnPr--fe2c4--2901 | -3246.918368 | 87.5 |
| 2511 | 13v-03-DitrapIcos--fe2c4--2356 | -3246.918351 | 87.6 |
| 2512 | 13v-03-DitrapIcos--fe2c4--2394 | -3246.918324 | 87.6 |
| 2513 | 13v-04-CapHexAnPr--fe2c4--3022 | -3246.918318 | 87.6 |
| 2514 | 13v-01-Doc--fe2c4--367         | -3246.91829  | 87.6 |
| 2515 | 13v-04-CapHexAnPr--fe2c4--2962 | -3246.918224 | 87.6 |
| 2516 | 13v-02-Hen--fe2c4--1656        | -3246.918159 | 87.7 |
| 2517 | 13v-01-Doc--fe2c4--546         | -3246.918139 | 87.7 |
| 2518 | 13v-02-Hen--fe2c4--1720        | -3246.918138 | 87.7 |
| 2519 | 13v-02-Hen--fe2c4--1464        | -3246.918103 | 87.7 |
| 2520 | 13v-04-CapHexAnPr--fe2c4--2921 | -3246.918086 | 87.7 |
| 2521 | 13v-01-Doc--fe2c4--244         | -3246.918067 | 87.7 |
| 2522 | 13v-02-Hen--fe2c4--1460        | -3246.918014 | 87.8 |
| 2523 | 13v-04-CapHexAnPr--fe2c4--3187 | -3246.917976 | 87.8 |
| 2524 | 13v-03-DitrapIcos--fe2c4--2405 | -3246.91793  | 87.8 |
| 2525 | 13v-04-CapHexAnPr--fe2c4--3269 | -3246.917924 | 87.8 |
| 2526 | 13v-04-CapHexAnPr--fe2c4--3384 | -3246.917909 | 87.8 |
| 2527 | 13v-04-CapHexAnPr--fe2c4--3024 | -3246.917884 | 87.9 |
| 2528 | 13v-03-DitrapIcos--fe2c4--2323 | -3246.917833 | 87.9 |
| 2529 | 13v-03-DitrapIcos--fe2c4--2398 | -3246.917807 | 87.9 |
| 2530 | 13v-03-DitrapIcos--fe2c4--2403 | -3246.917778 | 87.9 |
| 2531 | 13v-04-CapHexAnPr--fe2c4--3498 | -3246.917754 | 87.9 |
| 2532 | 13v-03-DitrapIcos--fe2c4--2261 | -3246.917736 | 87.9 |
| 2533 | 13v-02-Hen--fe2c4--1583        | -3246.917717 | 88.0 |
| 2534 | 13v-03-DitrapIcos--fe2c4--2290 | -3246.917699 | 88.0 |
| 2535 | 13v-04-CapHexAnPr--fe2c4--3555 | -3246.917691 | 88.0 |
| 2536 | 13v-04-CapHexAnPr--fe2c4--3364 | -3246.917681 | 88.0 |
| 2537 | 13v-01-Doc--fe2c4--366         | -3246.91768  | 88.0 |
| 2538 | 13v-01-Doc--fe2c4--619         | -3246.917679 | 88.0 |
| 2539 | 13v-04-CapHexAnPr--fe2c4--2946 | -3246.917671 | 88.0 |
| 2540 | 13v-03-DitrapIcos--fe2c4--2723 | -3246.917561 | 88.1 |
| 2541 | 13v-03-DitrapIcos--fe2c4--2451 | -3246.917552 | 88.1 |
| 2542 | 13v-04-CapHexAnPr--fe2c4--3256 | -3246.917516 | 88.1 |
| 2543 | 13v-03-DitrapIcos--fe2c4--2769 | -3246.917408 | 88.1 |
| 2544 | 13v-04-CapHexAnPr--fe2c4--3246 | -3246.917407 | 88.2 |
| 2545 | 13v-04-CapHexAnPr--fe2c4--3331 | -3246.917306 | 88.2 |
| 2546 | 13v-02-Hen--fe2c4--1810        | -3246.91728  | 88.2 |
| 2547 | 13v-01-Doc--fe2c4--1270        | -3246.917233 | 88.3 |

|      |                              |              |      |
|------|------------------------------|--------------|------|
| 2548 | 13v-04-CapHexAnPr—fe2c4—3592 | -3246.917218 | 88.3 |
| 2549 | 13v-03-DitrapIcos—fe2c4—2727 | -3246.917181 | 88.3 |
| 2550 | 13v-03-DitrapIcos—fe2c4—2699 | -3246.917167 | 88.3 |
| 2551 | 13v-03-DitrapIcos—fe2c4—2375 | -3246.917066 | 88.4 |
| 2552 | 13v-04-CapHexAnPr—fe2c4—3318 | -3246.917    | 88.4 |
| 2553 | 13v-01-Doc—fe2c4—621         | -3246.916944 | 88.4 |
| 2554 | 13v-03-DitrapIcos—fe2c4—2645 | -3246.91693  | 88.4 |
| 2555 | 13v-02-Hen—fe2c4—1907        | -3246.916876 | 88.5 |
| 2556 | 13v-04-CapHexAnPr—fe2c4—3342 | -3246.916813 | 88.5 |
| 2557 | 13v-03-DitrapIcos—fe2c4—2107 | -3246.91677  | 88.5 |
| 2558 | 13v-03-DitrapIcos—fe2c4—2302 | -3246.91675  | 88.6 |
| 2559 | 13v-03-DitrapIcos—fe2c4—2460 | -3246.916737 | 88.6 |
| 2560 | 13v-02-Hen—fe2c4—1528        | -3246.916671 | 88.6 |
| 2561 | 13v-01-Doc—fe2c4—13          | -3246.916611 | 88.6 |
| 2562 | 13v-01-Doc—fe2c4—275         | -3246.916607 | 88.7 |
| 2563 | 13v-01-Doc—fe2c4—42          | -3246.916478 | 88.7 |
| 2564 | 13v-03-DitrapIcos—fe2c4—2763 | -3246.916444 | 88.8 |
| 2565 | 13v-01-Doc—fe2c4—602         | -3246.916439 | 88.8 |
| 2566 | 13v-04-CapHexAnPr—fe2c4—3013 | -3246.916408 | 88.8 |
| 2567 | 13v-03-DitrapIcos—fe2c4—2089 | -3246.916373 | 88.8 |
| 2568 | 13v-02-Hen—fe2c4—1577        | -3246.916371 | 88.8 |
| 2569 | 13v-02-Hen—fe2c4—1614        | -3246.916312 | 88.8 |
| 2570 | 13v-03-DitrapIcos—fe2c4—2467 | -3246.916273 | 88.9 |
| 2571 | 13v-02-Hen—fe2c4—1727        | -3246.916227 | 88.9 |
| 2572 | 13v-02-Hen—fe2c4—1932        | -3246.916149 | 88.9 |
| 2573 | 13v-01-Doc—fe2c4—1268        | -3246.916142 | 88.9 |
| 2574 | 13v-04-CapHexAnPr—fe2c4—2893 | -3246.916128 | 89.0 |
| 2575 | 13v-04-CapHexAnPr—fe2c4—3547 | -3246.916105 | 89.0 |
| 2576 | 13v-02-Hen—fe2c4—1536        | -3246.916028 | 89.0 |
| 2577 | 13v-02-Hen—fe2c4—1738        | -3246.915958 | 89.1 |
| 2578 | 13v-01-Doc—fe2c4—346         | -3246.915943 | 89.1 |
| 2579 | 13v-03-DitrapIcos—fe2c4—2712 | -3246.915817 | 89.1 |
| 2580 | 13v-01-Doc—fe2c4—110         | -3246.915715 | 89.2 |
| 2581 | 13v-03-DitrapIcos—fe2c4—2512 | -3246.915669 | 89.2 |
| 2582 | 13v-03-DitrapIcos—fe2c4—2420 | -3246.915585 | 89.3 |
| 2583 | 13v-03-DitrapIcos—fe2c4—2157 | -3246.915565 | 89.3 |
| 2584 | 13v-04-CapHexAnPr—fe2c4—3470 | -3246.915516 | 89.3 |
| 2585 | 13v-04-CapHexAnPr—fe2c4—3482 | -3246.915478 | 89.4 |
| 2586 | 13v-04-CapHexAnPr—fe2c4—3460 | -3246.915457 | 89.4 |
| 2587 | 13v-04-CapHexAnPr—fe2c4—3520 | -3246.915353 | 89.4 |
| 2588 | 13v-02-Hen—fe2c4—1908        | -3246.915315 | 89.5 |
| 2589 | 13v-04-CapHexAnPr—fe2c4—3526 | -3246.915262 | 89.5 |
| 2590 | 13v-04-CapHexAnPr—fe2c4—3561 | -3246.915236 | 89.5 |
| 2591 | 13v-03-DitrapIcos—fe2c4—2327 | -3246.915228 | 89.5 |
| 2592 | 13v-03-DitrapIcos—fe2c4—2477 | -3246.915228 | 89.5 |
| 2593 | 13v-04-CapHexAnPr—fe2c4—3369 | -3246.915165 | 89.6 |
| 2594 | 13v-03-DitrapIcos—fe2c4—2189 | -3246.915132 | 89.6 |
| 2595 | 13v-04-CapHexAnPr—fe2c4—3223 | -3246.915113 | 89.6 |
| 2596 | 13v-04-CapHexAnPr—fe2c4—3267 | -3246.915113 | 89.6 |
| 2597 | 13v-03-DitrapIcos—fe2c4—2161 | -3246.915076 | 89.6 |
| 2598 | 13v-02-Hen—fe2c4—1377        | -3246.915061 | 89.6 |

|      |                              |              |      |
|------|------------------------------|--------------|------|
| 2599 | 13v-01-Doc—fe2c4—670         | -3246.915037 | 89.6 |
| 2600 | 13v-01-Doc—fe2c4—480         | -3246.914973 | 89.7 |
| 2601 | 13v-01-Doc—fe2c4—33          | -3246.914963 | 89.7 |
| 2602 | 13v-01-Doc—fe2c4—397         | -3246.914963 | 89.7 |
| 2603 | 13v-02-Hen—fe2c4—1749        | -3246.914948 | 89.7 |
| 2604 | 13v-02-Hen—fe2c4—1311        | -3246.914887 | 89.7 |
| 2605 | 13v-01-Doc—fe2c4—608         | -3246.914867 | 89.7 |
| 2606 | 13v-01-Doc—fe2c4—285         | -3246.91486  | 89.7 |
| 2607 | 13v-04-CapHexAnPr—fe2c4—3101 | -3246.914858 | 89.7 |
| 2608 | 13v-04-CapHexAnPr—fe2c4—3109 | -3246.914787 | 89.8 |
| 2609 | 13v-03-DitrapIcos—fe2c4—2108 | -3246.914783 | 89.8 |
| 2610 | 13v-01-Doc—fe2c4—1249        | -3246.91471  | 89.8 |
| 2611 | 13v-01-Doc—fe2c4—305         | -3246.914683 | 89.9 |
| 2612 | 13v-03-DitrapIcos—fe2c4—2870 | -3246.914657 | 89.9 |
| 2613 | 13v-02-Hen—fe2c4—1409        | -3246.914652 | 89.9 |
| 2614 | 13v-01-Doc—fe2c4—417         | -3246.914529 | 90.0 |
| 2615 | 13v-03-DitrapIcos—fe2c4—2590 | -3246.914529 | 90.0 |
| 2616 | 13v-01-Doc—fe2c4—258         | -3246.914491 | 90.0 |
| 2617 | 13v-01-Doc—fe2c4—662         | -3246.914419 | 90.0 |
| 2618 | 13v-01-Doc—fe2c4—410         | -3246.914347 | 90.1 |
| 2619 | 13v-01-Doc—fe2c4—278         | -3246.914166 | 90.2 |
| 2620 | 13v-02-Hen—fe2c4—1321        | -3246.914161 | 90.2 |
| 2621 | 13v-02-Hen—fe2c4—1571        | -3246.914031 | 90.3 |
| 2622 | 13v-01-Doc—fe2c4—439         | -3246.913956 | 90.3 |
| 2623 | 13v-03-DitrapIcos—fe2c4—2548 | -3246.913865 | 90.4 |
| 2624 | 13v-02-Hen—fe2c4—1975        | -3246.913837 | 90.4 |
| 2625 | 13v-03-DitrapIcos—fe2c4—2694 | -3246.913729 | 90.5 |
| 2626 | 13v-04-CapHexAnPr—fe2c4—3542 | -3246.913724 | 90.5 |
| 2627 | 13v-01-Doc—fe2c4—335         | -3246.913668 | 90.5 |
| 2628 | 13v-02-Hen—fe2c4—1508        | -3246.913602 | 90.5 |
| 2629 | 13v-02-Hen—fe2c4—1724        | -3246.913593 | 90.5 |
| 2630 | 13v-01-Doc—fe2c4—179         | -3246.913562 | 90.6 |
| 2631 | 13v-01-Doc—fe2c4—517         | -3246.913527 | 90.6 |
| 2632 | 13v-03-DitrapIcos—fe2c4—2303 | -3246.913471 | 90.6 |
| 2633 | 13v-02-Hen—fe2c4—1607        | -3246.913436 | 90.6 |
| 2634 | 13v-02-Hen—fe2c4—1477        | -3246.913302 | 90.7 |
| 2635 | 13v-01-Doc—fe2c4—576         | -3246.913291 | 90.7 |
| 2636 | 13v-03-DitrapIcos—fe2c4—2568 | -3246.91322  | 90.8 |
| 2637 | 13v-01-Doc—fe2c4—220         | -3246.913179 | 90.8 |
| 2638 | 13v-02-Hen—fe2c4—1784        | -3246.91315  | 90.8 |
| 2639 | 13v-02-Hen—fe2c4—1532        | -3246.913129 | 90.8 |
| 2640 | 13v-01-Doc—fe2c4—35          | -3246.913093 | 90.9 |
| 2641 | 13v-04-CapHexAnPr—fe2c4—3345 | -3246.912997 | 90.9 |
| 2642 | 13v-02-Hen—fe2c4—1501        | -3246.912799 | 91.0 |
| 2643 | 13v-04-CapHexAnPr—fe2c4—3272 | -3246.912798 | 91.0 |
| 2644 | 13v-04-CapHexAnPr—fe2c4—3149 | -3246.912789 | 91.0 |
| 2645 | 13v-04-CapHexAnPr—fe2c4—3493 | -3246.912781 | 91.1 |
| 2646 | 13v-04-CapHexAnPr—fe2c4—3473 | -3246.912718 | 91.1 |
| 2647 | 13v-01-Doc—fe2c4—347         | -3246.912582 | 91.2 |
| 2648 | 13v-03-DitrapIcos—fe2c4—2808 | -3246.912556 | 91.2 |
| 2649 | 13v-01-Doc—fe2c4—614         | -3246.912541 | 91.2 |

|      |                              |              |      |
|------|------------------------------|--------------|------|
| 2650 | 13v-02-Hen—fe2c4—1659        | -3246.912524 | 91.2 |
| 2651 | 13v-01-Doc—fe2c4—831         | -3246.912377 | 91.3 |
| 2652 | 13v-04-CapHexAnPr—fe2c4—3037 | -3246.912293 | 91.4 |
| 2653 | 13v-04-CapHexAnPr—fe2c4—3338 | -3246.912276 | 91.4 |
| 2654 | 13v-04-CapHexAnPr—fe2c4—2929 | -3246.912233 | 91.4 |
| 2655 | 13v-04-CapHexAnPr—fe2c4—3186 | -3246.912189 | 91.4 |
| 2656 | 13v-01-Doc—fe2c4—247         | -3246.912147 | 91.5 |
| 2657 | 13v-02-Hen—fe2c4—1954        | -3246.912145 | 91.5 |
| 2658 | 13v-03-DitrapIcos—fe2c4—2353 | -3246.912006 | 91.5 |
| 2659 | 13v-01-Doc—fe2c4—488         | -3246.911954 | 91.6 |
| 2660 | 13v-04-CapHexAnPr—fe2c4—3443 | -3246.911902 | 91.6 |
| 2661 | 13v-03-DitrapIcos—fe2c4—2292 | -3246.911763 | 91.7 |
| 2662 | 13v-01-Doc—fe2c4—560         | -3246.911739 | 91.7 |
| 2663 | 13v-04-CapHexAnPr—fe2c4—2891 | -3246.911697 | 91.7 |
| 2664 | 13v-01-Doc—fe2c4—1185        | -3246.911646 | 91.8 |
| 2665 | 13v-03-DitrapIcos—fe2c4—2647 | -3246.911619 | 91.8 |
| 2666 | 13v-02-Hen—fe2c4—2016        | -3246.911587 | 91.8 |
| 2667 | 13v-04-CapHexAnPr—fe2c4—3058 | -3246.91157  | 91.8 |
| 2668 | 13v-04-CapHexAnPr—fe2c4—3412 | -3246.911516 | 91.8 |
| 2669 | 13v-01-Doc—fe2c4—885         | -3246.911446 | 91.9 |
| 2670 | 13v-02-Hen—fe2c4—1959        | -3246.911321 | 92.0 |
| 2671 | 13v-04-CapHexAnPr—fe2c4—3496 | -3246.911247 | 92.0 |
| 2672 | 13v-04-CapHexAnPr—fe2c4—3459 | -3246.911191 | 92.1 |
| 2673 | 13v-04-CapHexAnPr—fe2c4—2988 | -3246.911173 | 92.1 |
| 2674 | 13v-01-Doc—fe2c4—330         | -3246.911104 | 92.1 |
| 2675 | 13v-01-Doc—fe2c4—767         | -3246.911039 | 92.1 |
| 2676 | 13v-01-Doc—fe2c4—242         | -3246.911012 | 92.2 |
| 2677 | 13v-02-Hen—fe2c4—1963        | -3246.910982 | 92.2 |
| 2678 | 13v-02-Hen—fe2c4—1513        | -3246.910923 | 92.2 |
| 2679 | 13v-01-Doc—fe2c4—584         | -3246.910888 | 92.2 |
| 2680 | 13v-04-CapHexAnPr—fe2c4—3551 | -3246.910887 | 92.2 |
| 2681 | 13v-04-CapHexAnPr—fe2c4—3558 | -3246.910849 | 92.3 |
| 2682 | 13v-04-CapHexAnPr—fe2c4—3538 | -3246.910828 | 92.3 |
| 2683 | 13v-04-CapHexAnPr—fe2c4—2948 | -3246.910811 | 92.3 |
| 2684 | 13v-01-Doc—fe2c4—604         | -3246.910793 | 92.3 |
| 2685 | 13v-04-CapHexAnPr—fe2c4—3398 | -3246.91079  | 92.3 |
| 2686 | 13v-01-Doc—fe2c4—982         | -3246.910765 | 92.3 |
| 2687 | 13v-04-CapHexAnPr—fe2c4—3580 | -3246.910713 | 92.4 |
| 2688 | 13v-04-CapHexAnPr—fe2c4—3049 | -3246.910707 | 92.4 |
| 2689 | 13v-04-CapHexAnPr—fe2c4—3502 | -3246.910668 | 92.4 |
| 2690 | 13v-03-DitrapIcos—fe2c4—2138 | -3246.910652 | 92.4 |
| 2691 | 13v-01-Doc—fe2c4—420         | -3246.910603 | 92.4 |
| 2692 | 13v-01-Doc—fe2c4—690         | -3246.910593 | 92.4 |
| 2693 | 13v-03-DitrapIcos—fe2c4—2457 | -3246.910463 | 92.5 |
| 2694 | 13v-01-Doc—fe2c4—1093        | -3246.910447 | 92.5 |
| 2695 | 13v-04-CapHexAnPr—fe2c4—3169 | -3246.910394 | 92.6 |
| 2696 | 13v-02-Hen—fe2c4—1384        | -3246.910366 | 92.6 |
| 2697 | 13v-04-CapHexAnPr—fe2c4—3383 | -3246.910355 | 92.6 |
| 2698 | 13v-04-CapHexAnPr—fe2c4—3035 | -3246.910232 | 92.7 |
| 2699 | 13v-04-CapHexAnPr—fe2c4—3458 | -3246.910197 | 92.7 |
| 2700 | 13v-04-CapHexAnPr—fe2c4—3451 | -3246.910027 | 92.8 |

|      |                              |              |      |
|------|------------------------------|--------------|------|
| 2701 | 13v-04-CapHexAnPr—fe2c4—3296 | -3246.910023 | 92.8 |
| 2702 | 13v-01-Doc—fe2c4—368         | -3246.90989  | 92.9 |
| 2703 | 13v-03-DitrapIcos—fe2c4—2357 | -3246.909834 | 92.9 |
| 2704 | 13v-01-Doc—fe2c4—708         | -3246.909798 | 92.9 |
| 2705 | 13v-01-Doc—fe2c4—60          | -3246.909743 | 93.0 |
| 2706 | 13v-03-DitrapIcos—fe2c4—2435 | -3246.909669 | 93.0 |
| 2707 | 13v-01-Doc—fe2c4—415         | -3246.909614 | 93.0 |
| 2708 | 13v-03-DitrapIcos—fe2c4—2749 | -3246.909602 | 93.0 |
| 2709 | 13v-04-CapHexAnPr—fe2c4—3389 | -3246.909598 | 93.1 |
| 2710 | 13v-04-CapHexAnPr—fe2c4—3042 | -3246.90958  | 93.1 |
| 2711 | 13v-02-Hen—fe2c4—1786        | -3246.909533 | 93.1 |
| 2712 | 13v-03-DitrapIcos—fe2c4—2558 | -3246.90949  | 93.1 |
| 2713 | 13v-04-CapHexAnPr—fe2c4—3539 | -3246.909484 | 93.1 |
| 2714 | 13v-01-Doc—fe2c4—79          | -3246.909478 | 93.1 |
| 2715 | 13v-04-CapHexAnPr—fe2c4—3312 | -3246.909425 | 93.2 |
| 2716 | 13v-01-Doc—fe2c4—594         | -3246.909373 | 93.2 |
| 2717 | 13v-01-Doc—fe2c4—1011        | -3246.90935  | 93.2 |
| 2718 | 13v-01-Doc—fe2c4—1231        | -3246.909345 | 93.2 |
| 2719 | 13v-03-DitrapIcos—fe2c4—2476 | -3246.909325 | 93.2 |
| 2720 | 13v-04-CapHexAnPr—fe2c4—3171 | -3246.909263 | 93.3 |
| 2721 | 13v-02-Hen—fe2c4—1731        | -3246.909247 | 93.3 |
| 2722 | 13v-04-CapHexAnPr—fe2c4—3264 | -3246.90924  | 93.3 |
| 2723 | 13v-04-CapHexAnPr—fe2c4—3242 | -3246.909233 | 93.3 |
| 2724 | 13v-01-Doc—fe2c4—1242        | -3246.909209 | 93.3 |
| 2725 | 13v-01-Doc—fe2c4—295         | -3246.9092   | 93.3 |
| 2726 | 13v-01-Doc—fe2c4—1013        | -3246.909188 | 93.3 |
| 2727 | 13v-04-CapHexAnPr—fe2c4—3192 | -3246.909169 | 93.3 |
| 2728 | 13v-04-CapHexAnPr—fe2c4—3411 | -3246.909166 | 93.3 |
| 2729 | 13v-01-Doc—fe2c4—588         | -3246.909133 | 93.3 |
| 2730 | 13v-01-Doc—fe2c4—579         | -3246.909131 | 93.3 |
| 2731 | 13v-01-Doc—fe2c4—623         | -3246.90912  | 93.4 |
| 2732 | 13v-04-CapHexAnPr—fe2c4—2996 | -3246.909114 | 93.4 |
| 2733 | 13v-02-Hen—fe2c4—1582        | -3246.909105 | 93.4 |
| 2734 | 13v-01-Doc—fe2c4—375         | -3246.909093 | 93.4 |
| 2735 | 13v-01-Doc—fe2c4—139         | -3246.90905  | 93.4 |
| 2736 | 13v-04-CapHexAnPr—fe2c4—3055 | -3246.909033 | 93.4 |
| 2737 | 13v-04-CapHexAnPr—fe2c4—3204 | -3246.90902  | 93.4 |
| 2738 | 13v-03-DitrapIcos—fe2c4—2803 | -3246.909003 | 93.4 |
| 2739 | 13v-01-Doc—fe2c4—97          | -3246.908995 | 93.4 |
| 2740 | 13v-01-Doc—fe2c4—1039        | -3246.908951 | 93.5 |
| 2741 | 13v-01-Doc—fe2c4—1090        | -3246.908924 | 93.5 |
| 2742 | 13v-02-Hen—fe2c4—1689        | -3246.908916 | 93.5 |
| 2743 | 13v-04-CapHexAnPr—fe2c4—3270 | -3246.908892 | 93.5 |
| 2744 | 13v-02-Hen—fe2c4—1680        | -3246.908665 | 93.6 |
| 2745 | 13v-03-DitrapIcos—fe2c4—2618 | -3246.908658 | 93.6 |
| 2746 | 13v-01-Doc—fe2c4—350         | -3246.908562 | 93.7 |
| 2747 | 13v-01-Doc—fe2c4—1170        | -3246.908538 | 93.7 |
| 2748 | 13v-02-Hen—fe2c4—1540        | -3246.908489 | 93.7 |
| 2749 | 13v-04-CapHexAnPr—fe2c4—3394 | -3246.908483 | 93.8 |
| 2750 | 13v-01-Doc—fe2c4—434         | -3246.908478 | 93.8 |
| 2751 | 13v-01-Doc—fe2c4—539         | -3246.908458 | 93.8 |

|      |                              |              |      |
|------|------------------------------|--------------|------|
| 2752 | 13v-04-CapHexAnPr—fe2c4—3529 | -3246.908419 | 93.8 |
| 2753 | 13v-03-DitrapIcos—fe2c4—2643 | -3246.908299 | 93.9 |
| 2754 | 13v-01-Doc—fe2c4—348         | -3246.90821  | 93.9 |
| 2755 | 13v-04-CapHexAnPr—fe2c4—2899 | -3246.908017 | 94.0 |
| 2756 | 13v-02-Hen—fe2c4—1598        | -3246.90801  | 94.0 |
| 2757 | 13v-01-Doc—fe2c4—1072        | -3246.907902 | 94.1 |
| 2758 | 13v-03-DitrapIcos—fe2c4—2142 | -3246.907883 | 94.1 |
| 2759 | 13v-04-CapHexAnPr—fe2c4—3206 | -3246.907879 | 94.1 |
| 2760 | 13v-01-Doc—fe2c4—635         | -3246.907747 | 94.2 |
| 2761 | 13v-01-Doc—fe2c4—168         | -3246.907736 | 94.2 |
| 2762 | 13v-04-CapHexAnPr—fe2c4—3146 | -3246.907706 | 94.2 |
| 2763 | 13v-04-CapHexAnPr—fe2c4—2924 | -3246.907702 | 94.2 |
| 2764 | 13v-04-CapHexAnPr—fe2c4—3423 | -3246.907677 | 94.3 |
| 2765 | 13v-01-Doc—fe2c4—516         | -3246.907669 | 94.3 |
| 2766 | 13v-03-DitrapIcos—fe2c4—2473 | -3246.907629 | 94.3 |
| 2767 | 13v-04-CapHexAnPr—fe2c4—3175 | -3246.907564 | 94.3 |
| 2768 | 13v-04-CapHexAnPr—fe2c4—3522 | -3246.907491 | 94.4 |
| 2769 | 13v-03-DitrapIcos—fe2c4—2148 | -3246.907484 | 94.4 |
| 2770 | 13v-01-Doc—fe2c4—504         | -3246.907407 | 94.4 |
| 2771 | 13v-02-Hen—fe2c4—1906        | -3246.907369 | 94.4 |
| 2772 | 13v-03-DitrapIcos—fe2c4—2245 | -3246.907175 | 94.6 |
| 2773 | 13v-01-Doc—fe2c4—384         | -3246.907098 | 94.6 |
| 2774 | 13v-02-Hen—fe2c4—1404        | -3246.907094 | 94.6 |
| 2775 | 13v-04-CapHexAnPr—fe2c4—2968 | -3246.907091 | 94.6 |
| 2776 | 13v-01-Doc—fe2c4—1059        | -3246.907035 | 94.7 |
| 2777 | 13v-02-Hen—fe2c4—1836        | -3246.907018 | 94.7 |
| 2778 | 13v-04-CapHexAnPr—fe2c4—2971 | -3246.907015 | 94.7 |
| 2779 | 13v-04-CapHexAnPr—fe2c4—3515 | -3246.906984 | 94.7 |
| 2780 | 13v-03-DitrapIcos—fe2c4—2118 | -3246.906925 | 94.7 |
| 2781 | 13v-03-DitrapIcos—fe2c4—2275 | -3246.906894 | 94.7 |
| 2782 | 13v-02-Hen—fe2c4—1913        | -3246.906888 | 94.8 |
| 2783 | 13v-04-CapHexAnPr—fe2c4—3315 | -3246.906777 | 94.8 |
| 2784 | 13v-01-Doc—fe2c4—396         | -3246.906758 | 94.8 |
| 2785 | 13v-01-Doc—fe2c4—1156        | -3246.906723 | 94.9 |
| 2786 | 13v-01-Doc—fe2c4—261         | -3246.906691 | 94.9 |
| 2787 | 13v-04-CapHexAnPr—fe2c4—3281 | -3246.906613 | 94.9 |
| 2788 | 13v-03-DitrapIcos—fe2c4—2479 | -3246.906603 | 94.9 |
| 2789 | 13v-01-Doc—fe2c4—1252        | -3246.906585 | 94.9 |
| 2790 | 13v-01-Doc—fe2c4—1290        | -3246.906554 | 95.0 |
| 2791 | 13v-01-Doc—fe2c4—1113        | -3246.906521 | 95.0 |
| 2792 | 13v-04-CapHexAnPr—fe2c4—3511 | -3246.906472 | 95.0 |
| 2793 | 13v-02-Hen—fe2c4—1370        | -3246.906425 | 95.0 |
| 2794 | 13v-01-Doc—fe2c4—636         | -3246.906419 | 95.0 |
| 2795 | 13v-01-Doc—fe2c4—454         | -3246.906382 | 95.1 |
| 2796 | 13v-04-CapHexAnPr—fe2c4—3481 | -3246.906317 | 95.1 |
| 2797 | 13v-03-DitrapIcos—fe2c4—2483 | -3246.906261 | 95.1 |
| 2798 | 13v-03-DitrapIcos—fe2c4—2127 | -3246.906233 | 95.2 |
| 2799 | 13v-02-Hen—fe2c4—1702        | -3246.906214 | 95.2 |
| 2800 | 13v-04-CapHexAnPr—fe2c4—3563 | -3246.906104 | 95.2 |
| 2801 | 13v-03-DitrapIcos—fe2c4—2132 | -3246.906068 | 95.3 |
| 2802 | 13v-01-Doc—fe2c4—1186        | -3246.906042 | 95.3 |

|      |                              |              |      |
|------|------------------------------|--------------|------|
| 2803 | 13v-04-CapHexAnPr—fe2c4—3344 | -3246.905967 | 95.3 |
| 2804 | 13v-04-CapHexAnPr—fe2c4—3177 | -3246.905961 | 95.3 |
| 2805 | 13v-01-Doc—fe2c4—748         | -3246.905842 | 95.4 |
| 2806 | 13v-01-Doc—fe2c4—57          | -3246.905761 | 95.5 |
| 2807 | 13v-03-DitrapIcos—fe2c4—2540 | -3246.905668 | 95.5 |
| 2808 | 13v-01-Doc—fe2c4—711         | -3246.905624 | 95.5 |
| 2809 | 13v-04-CapHexAnPr—fe2c4—2944 | -3246.905594 | 95.6 |
| 2810 | 13v-01-Doc—fe2c4—284         | -3246.905561 | 95.6 |
| 2811 | 13v-02-Hen—fe2c4—1415        | -3246.90542  | 95.7 |
| 2812 | 13v-04-CapHexAnPr—fe2c4—3324 | -3246.905224 | 95.8 |
| 2813 | 13v-02-Hen—fe2c4—1512        | -3246.905179 | 95.8 |
| 2814 | 13v-01-Doc—fe2c4—251         | -3246.905137 | 95.8 |
| 2815 | 13v-02-Hen—fe2c4—1451        | -3246.905122 | 95.9 |
| 2816 | 13v-03-DitrapIcos—fe2c4—2484 | -3246.905121 | 95.9 |
| 2817 | 13v-04-CapHexAnPr—fe2c4—3578 | -3246.905112 | 95.9 |
| 2818 | 13v-03-DitrapIcos—fe2c4—2751 | -3246.905102 | 95.9 |
| 2819 | 13v-03-DitrapIcos—fe2c4—2739 | -3246.905024 | 95.9 |
| 2820 | 13v-01-Doc—fe2c4—304         | -3246.904998 | 95.9 |
| 2821 | 13v-01-Doc—fe2c4—561         | -3246.904959 | 96.0 |
| 2822 | 13v-01-Doc—fe2c4—1291        | -3246.904935 | 96.0 |
| 2823 | 13v-04-CapHexAnPr—fe2c4—3513 | -3246.90488  | 96.0 |
| 2824 | 13v-02-Hen—fe2c4—1697        | -3246.904845 | 96.0 |
| 2825 | 13v-02-Hen—fe2c4—1519        | -3246.904844 | 96.0 |
| 2826 | 13v-03-DitrapIcos—fe2c4—2888 | -3246.904815 | 96.1 |
| 2827 | 13v-01-Doc—fe2c4—124         | -3246.904785 | 96.1 |
| 2828 | 13v-04-CapHexAnPr—fe2c4—3485 | -3246.904758 | 96.1 |
| 2829 | 13v-01-Doc—fe2c4—547         | -3246.904712 | 96.1 |
| 2830 | 13v-03-DitrapIcos—fe2c4—2344 | -3246.904634 | 96.2 |
| 2831 | 13v-03-DitrapIcos—fe2c4—2617 | -3246.90463  | 96.2 |
| 2832 | 13v-01-Doc—fe2c4—540         | -3246.904581 | 96.2 |
| 2833 | 13v-03-DitrapIcos—fe2c4—2757 | -3246.904499 | 96.3 |
| 2834 | 13v-01-Doc—fe2c4—679         | -3246.904457 | 96.3 |
| 2835 | 13v-04-CapHexAnPr—fe2c4—3259 | -3246.904375 | 96.3 |
| 2836 | 13v-04-CapHexAnPr—fe2c4—2922 | -3246.90437  | 96.3 |
| 2837 | 13v-02-Hen—fe2c4—1717        | -3246.904284 | 96.4 |
| 2838 | 13v-01-Doc—fe2c4—802         | -3246.904125 | 96.5 |
| 2839 | 13v-01-Doc—fe2c4—501         | -3246.904051 | 96.5 |
| 2840 | 13v-01-Doc—fe2c4—1237        | -3246.903992 | 96.6 |
| 2841 | 13v-02-Hen—fe2c4—1910        | -3246.903788 | 96.7 |
| 2842 | 13v-03-DitrapIcos—fe2c4—2503 | -3246.903687 | 96.8 |
| 2843 | 13v-02-Hen—fe2c4—1494        | -3246.903467 | 96.9 |
| 2844 | 13v-03-DitrapIcos—fe2c4—2809 | -3246.903437 | 96.9 |
| 2845 | 13v-01-Doc—fe2c4—512         | -3246.903389 | 96.9 |
| 2846 | 13v-02-Hen—fe2c4—1481        | -3246.903355 | 97.0 |
| 2847 | 13v-01-Doc—fe2c4—484         | -3246.903342 | 97.0 |
| 2848 | 13v-01-Doc—fe2c4—525         | -3246.903304 | 97.0 |
| 2849 | 13v-04-CapHexAnPr—fe2c4—3452 | -3246.903302 | 97.0 |
| 2850 | 13v-03-DitrapIcos—fe2c4—2711 | -3246.903095 | 97.1 |
| 2851 | 13v-03-DitrapIcos—fe2c4—2538 | -3246.903024 | 97.2 |
| 2852 | 13v-04-CapHexAnPr—fe2c4—3188 | -3246.902996 | 97.2 |
| 2853 | 13v-01-Doc—fe2c4—566         | -3246.902968 | 97.2 |

|      |                              |              |      |
|------|------------------------------|--------------|------|
| 2854 | 13v-01-Doc—fe2c4—1068        | -3246.902947 | 97.2 |
| 2855 | 13v-01-Doc—fe2c4—601         | -3246.902921 | 97.2 |
| 2856 | 13v-01-Doc—fe2c4—593         | -3246.902898 | 97.3 |
| 2857 | 13v-01-Doc—fe2c4—314         | -3246.902877 | 97.3 |
| 2858 | 13v-03-DitrapIcos—fe2c4—2725 | -3246.902869 | 97.3 |
| 2859 | 13v-01-Doc—fe2c4—620         | -3246.902784 | 97.3 |
| 2860 | 13v-01-Doc—fe2c4—446         | -3246.902757 | 97.3 |
| 2861 | 13v-01-Doc—fe2c4—1098        | -3246.902653 | 97.4 |
| 2862 | 13v-04-CapHexAnPr—fe2c4—3462 | -3246.902613 | 97.4 |
| 2863 | 13v-01-Doc—fe2c4—1181        | -3246.902595 | 97.4 |
| 2864 | 13v-01-Doc—fe2c4—762         | -3246.90258  | 97.5 |
| 2865 | 13v-04-CapHexAnPr—fe2c4—3508 | -3246.902569 | 97.5 |
| 2866 | 13v-01-Doc—fe2c4—577         | -3246.902559 | 97.5 |
| 2867 | 13v-04-CapHexAnPr—fe2c4—3478 | -3246.902524 | 97.5 |
| 2868 | 13v-01-Doc—fe2c4—599         | -3246.902495 | 97.5 |
| 2869 | 13v-03-DitrapIcos—fe2c4—2598 | -3246.902322 | 97.6 |
| 2870 | 13v-02-Hen—fe2c4—1575        | -3246.902302 | 97.6 |
| 2871 | 13v-03-DitrapIcos—fe2c4—2851 | -3246.902266 | 97.7 |
| 2872 | 13v-04-CapHexAnPr—fe2c4—2942 | -3246.902245 | 97.7 |
| 2873 | 13v-03-DitrapIcos—fe2c4—2359 | -3246.902231 | 97.7 |
| 2874 | 13v-03-DitrapIcos—fe2c4—2644 | -3246.902225 | 97.7 |
| 2875 | 13v-01-Doc—fe2c4—339         | -3246.902193 | 97.7 |
| 2876 | 13v-03-DitrapIcos—fe2c4—2820 | -3246.902178 | 97.7 |
| 2877 | 13v-03-DitrapIcos—fe2c4—2188 | -3246.902079 | 97.8 |
| 2878 | 13v-03-DitrapIcos—fe2c4—2553 | -3246.902078 | 97.8 |
| 2879 | 13v-01-Doc—fe2c4—356         | -3246.90207  | 97.8 |
| 2880 | 13v-01-Doc—fe2c4—518         | -3246.901851 | 97.9 |
| 2881 | 13v-01-Doc—fe2c4—521         | -3246.901836 | 97.9 |
| 2882 | 13v-03-DitrapIcos—fe2c4—2425 | -3246.901833 | 97.9 |
| 2883 | 13v-03-DitrapIcos—fe2c4—2399 | -3246.901716 | 98.0 |
| 2884 | 13v-01-Doc—fe2c4—249         | -3246.901677 | 98.0 |
| 2885 | 13v-03-DitrapIcos—fe2c4—2203 | -3246.901562 | 98.1 |
| 2886 | 13v-03-DitrapIcos—fe2c4—2273 | -3246.901516 | 98.1 |
| 2887 | 13v-04-CapHexAnPr—fe2c4—3032 | -3246.901484 | 98.1 |
| 2888 | 13v-02-Hen—fe2c4—1385        | -3246.901442 | 98.2 |
| 2889 | 13v-03-DitrapIcos—fe2c4—2170 | -3246.901351 | 98.2 |
| 2890 | 13v-04-CapHexAnPr—fe2c4—3417 | -3246.901329 | 98.2 |
| 2891 | 13v-01-Doc—fe2c4—733         | -3246.901291 | 98.3 |
| 2892 | 13v-01-Doc—fe2c4—329         | -3246.901165 | 98.3 |
| 2893 | 13v-03-DitrapIcos—fe2c4—2318 | -3246.901147 | 98.4 |
| 2894 | 13v-01-Doc—fe2c4—112         | -3246.901111 | 98.4 |
| 2895 | 13v-01-Doc—fe2c4—373         | -3246.901052 | 98.4 |
| 2896 | 13v-03-DitrapIcos—fe2c4—2277 | -3246.901028 | 98.4 |
| 2897 | 13v-01-Doc—fe2c4—398         | -3246.900966 | 98.5 |
| 2898 | 13v-04-CapHexAnPr—fe2c4—3096 | -3246.900962 | 98.5 |
| 2899 | 13v-01-Doc—fe2c4—372         | -3246.900949 | 98.5 |
| 2900 | 13v-03-DitrapIcos—fe2c4—2215 | -3246.90094  | 98.5 |
| 2901 | 13v-03-DitrapIcos—fe2c4—2387 | -3246.900882 | 98.5 |
| 2902 | 13v-01-Doc—fe2c4—409         | -3246.900881 | 98.5 |
| 2903 | 13v-04-CapHexAnPr—fe2c4—3317 | -3246.900875 | 98.5 |
| 2904 | 13v-03-DitrapIcos—fe2c4—2740 | -3246.900861 | 98.5 |



|      |                              |              |       |
|------|------------------------------|--------------|-------|
| 2905 | 13v-03-DitrapIcos—fe2c4—2830 | -3246.90072  | 98.6  |
| 2906 | 13v-03-DitrapIcos—fe2c4—2095 | -3246.900604 | 98.7  |
| 2907 | 13v-03-DitrapIcos—fe2c4—2843 | -3246.9006   | 98.7  |
| 2908 | 13v-02-Hen—fe2c4—1602        | -3246.900555 | 98.7  |
| 2909 | 13v-01-Doc—fe2c4—189         | -3246.900499 | 98.8  |
| 2910 | 13v-02-Hen—fe2c4—1389        | -3246.900443 | 98.8  |
| 2911 | 13v-04-CapHexAnPr—fe2c4—3516 | -3246.900392 | 98.8  |
| 2912 | 13v-04-CapHexAnPr—fe2c4—3552 | -3246.900359 | 98.8  |
| 2913 | 13v-03-DitrapIcos—fe2c4—2833 | -3246.900337 | 98.9  |
| 2914 | 13v-02-Hen—fe2c4—1958        | -3246.90027  | 98.9  |
| 2915 | 13v-01-Doc—fe2c4—225         | -3246.900045 | 99.0  |
| 2916 | 13v-03-DitrapIcos—fe2c4—2155 | -3246.9      | 99.1  |
| 2917 | 13v-02-Hen—fe2c4—1950        | -3246.899937 | 99.1  |
| 2918 | 13v-02-Hen—fe2c4—1815        | -3246.899884 | 99.1  |
| 2919 | 13v-01-Doc—fe2c4—362         | -3246.899864 | 99.2  |
| 2920 | 13v-01-Doc—fe2c4—1161        | -3246.89979  | 99.2  |
| 2921 | 13v-04-CapHexAnPr—fe2c4—3202 | -3246.899713 | 99.3  |
| 2922 | 13v-03-DitrapIcos—fe2c4—2826 | -3246.899696 | 99.3  |
| 2923 | 13v-04-CapHexAnPr—fe2c4—3489 | -3246.899633 | 99.3  |
| 2924 | 13v-02-Hen—fe2c4—2017        | -3246.899588 | 99.3  |
| 2925 | 13v-04-CapHexAnPr—fe2c4—3577 | -3246.899545 | 99.4  |
| 2926 | 13v-04-CapHexAnPr—fe2c4—3236 | -3246.899441 | 99.4  |
| 2927 | 13v-04-CapHexAnPr—fe2c4—3433 | -3246.899409 | 99.4  |
| 2928 | 13v-01-Doc—fe2c4—1032        | -3246.899355 | 99.5  |
| 2929 | 13v-04-CapHexAnPr—fe2c4—3528 | -3246.899265 | 99.5  |
| 2930 | 13v-01-Doc—fe2c4—170         | -3246.899171 | 99.6  |
| 2931 | 13v-04-CapHexAnPr—fe2c4—2949 | -3246.899133 | 99.6  |
| 2932 | 13v-01-Doc—fe2c4—165         | -3246.899001 | 99.7  |
| 2933 | 13v-03-DitrapIcos—fe2c4—2533 | -3246.898941 | 99.7  |
| 2934 | 13v-03-DitrapIcos—fe2c4—2329 | -3246.898816 | 99.8  |
| 2935 | 13v-01-Doc—fe2c4—544         | -3246.898681 | 99.9  |
| 2936 | 13v-03-DitrapIcos—fe2c4—2858 | -3246.898621 | 99.9  |
| 2937 | 13v-04-CapHexAnPr—fe2c4—2923 | -3246.898588 | 100.0 |
| 2938 | 13v-01-Doc—fe2c4—1243        | -3246.898542 | 100.0 |
| 2939 | 13v-03-DitrapIcos—fe2c4—2745 | -3246.898504 | 100.0 |
| 2940 | 13v-04-CapHexAnPr—fe2c4—3348 | -3246.898419 | 100.1 |
| 2941 | 13v-01-Doc—fe2c4—973         | -3246.898277 | 100.2 |
| 2942 | 13v-01-Doc—fe2c4—414         | -3246.898247 | 100.2 |
| 2943 | 13v-01-Doc—fe2c4—358         | -3246.898217 | 100.2 |
| 2944 | 13v-03-DitrapIcos—fe2c4—2268 | -3246.898187 | 100.2 |
| 2945 | 13v-01-Doc—fe2c4—492         | -3246.898173 | 100.2 |
| 2946 | 13v-04-CapHexAnPr—fe2c4—3172 | -3246.898102 | 100.3 |
| 2947 | 13v-04-CapHexAnPr—fe2c4—3043 | -3246.898058 | 100.3 |
| 2948 | 13v-02-Hen—fe2c4—1368        | -3246.898043 | 100.3 |
| 2949 | 13v-03-DitrapIcos—fe2c4—2819 | -3246.897975 | 100.3 |
| 2950 | 13v-04-CapHexAnPr—fe2c4—3108 | -3246.897961 | 100.4 |
| 2951 | 13v-04-CapHexAnPr—fe2c4—3041 | -3246.897872 | 100.4 |
| 2952 | 13v-01-Doc—fe2c4—402         | -3246.897822 | 100.4 |
| 2953 | 13v-03-DitrapIcos—fe2c4—2557 | -3246.897807 | 100.4 |
| 2954 | 13v-04-CapHexAnPr—fe2c4—2926 | -3246.897666 | 100.5 |
| 2955 | 13v-02-Hen—fe2c4—1919        | -3246.897649 | 100.5 |

|      |                              |              |       |
|------|------------------------------|--------------|-------|
| 2956 | 13v-03-DitrapIcos—fe2c4—2209 | -3246.897623 | 100.6 |
| 2957 | 13v-03-DitrapIcos—fe2c4—2270 | -3246.897616 | 100.6 |
| 2958 | 13v-04-CapHexAnPr—fe2c4—3349 | -3246.897533 | 100.6 |
| 2959 | 13v-02-Hen—fe2c4—1539        | -3246.897464 | 100.7 |
| 2960 | 13v-01-Doc—fe2c4—603         | -3246.897411 | 100.7 |
| 2961 | 13v-03-DitrapIcos—fe2c4—2267 | -3246.897387 | 100.7 |
| 2962 | 13v-03-DitrapIcos—fe2c4—2456 | -3246.897351 | 100.7 |
| 2963 | 13v-01-Doc—fe2c4—537         | -3246.897278 | 100.8 |
| 2964 | 13v-04-CapHexAnPr—fe2c4—3065 | -3246.897275 | 100.8 |
| 2965 | 13v-01-Doc—fe2c4—572         | -3246.897234 | 100.8 |
| 2966 | 13v-03-DitrapIcos—fe2c4—2424 | -3246.89715  | 100.9 |
| 2967 | 13v-04-CapHexAnPr—fe2c4—3226 | -3246.89715  | 100.9 |
| 2968 | 13v-03-DitrapIcos—fe2c4—2396 | -3246.897105 | 100.9 |
| 2969 | 13v-04-CapHexAnPr—fe2c4—3307 | -3246.897046 | 100.9 |
| 2970 | 13v-04-CapHexAnPr—fe2c4—3225 | -3246.897019 | 100.9 |
| 2971 | 13v-03-DitrapIcos—fe2c4—2371 | -3246.896912 | 101.0 |
| 2972 | 13v-02-Hen—fe2c4—1448        | -3246.896898 | 101.0 |
| 2973 | 13v-04-CapHexAnPr—fe2c4—2943 | -3246.896821 | 101.1 |
| 2974 | 13v-01-Doc—fe2c4—483         | -3246.896718 | 101.1 |
| 2975 | 13v-03-DitrapIcos—fe2c4—2527 | -3246.896612 | 101.2 |
| 2976 | 13v-01-Doc—fe2c4—429         | -3246.896594 | 101.2 |
| 2977 | 13v-01-Doc—fe2c4—1069        | -3246.896566 | 101.2 |
| 2978 | 13v-01-Doc—fe2c4—609         | -3246.896558 | 101.2 |
| 2979 | 13v-01-Doc—fe2c4—1065        | -3246.8965   | 101.3 |
| 2980 | 13v-01-Doc—fe2c4—598         | -3246.896464 | 101.3 |
| 2981 | 13v-04-CapHexAnPr—fe2c4—3430 | -3246.89643  | 101.3 |
| 2982 | 13v-04-CapHexAnPr—fe2c4—3366 | -3246.896337 | 101.4 |
| 2983 | 13v-03-DitrapIcos—fe2c4—2165 | -3246.896307 | 101.4 |
| 2984 | 13v-02-Hen—fe2c4—1933        | -3246.896299 | 101.4 |
| 2985 | 13v-01-Doc—fe2c4—738         | -3246.896249 | 101.4 |
| 2986 | 13v-02-Hen—fe2c4—1360        | -3246.896158 | 101.5 |
| 2987 | 13v-01-Doc—fe2c4—580         | -3246.896132 | 101.5 |
| 2988 | 13v-02-Hen—fe2c4—1657        | -3246.89606  | 101.5 |
| 2989 | 13v-02-Hen—fe2c4—1343        | -3246.896007 | 101.6 |
| 2990 | 13v-04-CapHexAnPr—fe2c4—3047 | -3246.895942 | 101.6 |
| 2991 | 13v-02-Hen—fe2c4—1338        | -3246.895881 | 101.7 |
| 2992 | 13v-01-Doc—fe2c4—790         | -3246.895615 | 101.8 |
| 2993 | 13v-03-DitrapIcos—fe2c4—2358 | -3246.895519 | 101.9 |
| 2994 | 13v-04-CapHexAnPr—fe2c4—2916 | -3246.89546  | 101.9 |
| 2995 | 13v-04-CapHexAnPr—fe2c4—3448 | -3246.895383 | 102.0 |
| 2996 | 13v-04-CapHexAnPr—fe2c4—3370 | -3246.895357 | 102.0 |
| 2997 | 13v-01-Doc—fe2c4—502         | -3246.895173 | 102.1 |
| 2998 | 13v-04-CapHexAnPr—fe2c4—2905 | -3246.89516  | 102.1 |
| 2999 | 13v-04-CapHexAnPr—fe2c4—3419 | -3246.894983 | 102.2 |
| 3000 | 13v-03-DitrapIcos—fe2c4—2269 | -3246.894947 | 102.2 |
| 3001 | 13v-04-CapHexAnPr—fe2c4—3486 | -3246.894945 | 102.2 |
| 3002 | 13v-01-Doc—fe2c4—712         | -3246.894847 | 102.3 |
| 3003 | 13v-03-DitrapIcos—fe2c4—2737 | -3246.894652 | 102.4 |
| 3004 | 13v-02-Hen—fe2c4—1542        | -3246.894634 | 102.4 |
| 3005 | 13v-03-DitrapIcos—fe2c4—2341 | -3246.894598 | 102.5 |
| 3006 | 13v-01-Doc—fe2c4—1019        | -3246.894534 | 102.5 |

|      |                              |              |       |
|------|------------------------------|--------------|-------|
| 3007 | 13v-04-CapHexAnPr—fe2c4—2937 | -3246.894527 | 102.5 |
| 3008 | 13v-04-CapHexAnPr—fe2c4—3209 | -3246.894406 | 102.6 |
| 3009 | 13v-03-DitrapIcos—fe2c4—2563 | -3246.894381 | 102.6 |
| 3010 | 13v-01-Doc—fe2c4—531         | -3246.894281 | 102.7 |
| 3011 | 13v-01-Doc—fe2c4—334         | -3246.894167 | 102.7 |
| 3012 | 13v-03-DitrapIcos—fe2c4—2328 | -3246.893896 | 102.9 |
| 3013 | 13v-01-Doc—fe2c4—199         | -3246.89374  | 103.0 |
| 3014 | 13v-04-CapHexAnPr—fe2c4—3438 | -3246.893727 | 103.0 |
| 3015 | 13v-01-Doc—fe2c4—234         | -3246.893587 | 103.1 |
| 3016 | 13v-01-Doc—fe2c4—750         | -3246.893577 | 103.1 |
| 3017 | 13v-04-CapHexAnPr—fe2c4—3543 | -3246.893507 | 103.1 |
| 3018 | 13v-04-CapHexAnPr—fe2c4—3271 | -3246.893475 | 103.2 |
| 3019 | 13v-01-Doc—fe2c4—642         | -3246.893461 | 103.2 |
| 3020 | 13v-04-CapHexAnPr—fe2c4—3579 | -3246.893385 | 103.2 |
| 3021 | 13v-03-DitrapIcos—fe2c4—2235 | -3246.893269 | 103.3 |
| 3022 | 13v-01-Doc—fe2c4—613         | -3246.893248 | 103.3 |
| 3023 | 13v-01-Doc—fe2c4—1050        | -3246.893191 | 103.3 |
| 3024 | 13v-01-Doc—fe2c4—595         | -3246.89316  | 103.4 |
| 3025 | 13v-04-CapHexAnPr—fe2c4—3374 | -3246.893129 | 103.4 |
| 3026 | 13v-03-DitrapIcos—fe2c4—2300 | -3246.8931   | 103.4 |
| 3027 | 13v-03-DitrapIcos—fe2c4—2219 | -3246.893092 | 103.4 |
| 3028 | 13v-03-DitrapIcos—fe2c4—2461 | -3246.893059 | 103.4 |
| 3029 | 13v-03-DitrapIcos—fe2c4—2687 | -3246.893049 | 103.4 |
| 3030 | 13v-01-Doc—fe2c4—282         | -3246.893043 | 103.4 |
| 3031 | 13v-04-CapHexAnPr—fe2c4—3116 | -3246.893037 | 103.4 |
| 3032 | 13v-04-CapHexAnPr—fe2c4—3472 | -3246.893035 | 103.4 |
| 3033 | 13v-01-Doc—fe2c4—379         | -3246.892993 | 103.5 |
| 3034 | 13v-03-DitrapIcos—fe2c4—2718 | -3246.892985 | 103.5 |
| 3035 | 13v-01-Doc—fe2c4—114         | -3246.892923 | 103.5 |
| 3036 | 13v-03-DitrapIcos—fe2c4—2762 | -3246.892922 | 103.5 |
| 3037 | 13v-04-CapHexAnPr—fe2c4—3200 | -3246.892884 | 103.5 |
| 3038 | 13v-01-Doc—fe2c4—142         | -3246.892872 | 103.5 |
| 3039 | 13v-03-DitrapIcos—fe2c4—2360 | -3246.892862 | 103.6 |
| 3040 | 13v-02-Hen—fe2c4—1669        | -3246.892857 | 103.6 |
| 3041 | 13v-03-DitrapIcos—fe2c4—2347 | -3246.892791 | 103.6 |
| 3042 | 13v-04-CapHexAnPr—fe2c4—3191 | -3246.892732 | 103.6 |
| 3043 | 13v-02-Hen—fe2c4—1332        | -3246.892678 | 103.7 |
| 3044 | 13v-04-CapHexAnPr—fe2c4—2911 | -3246.892678 | 103.7 |
| 3045 | 13v-04-CapHexAnPr—fe2c4—3083 | -3246.892514 | 103.8 |
| 3046 | 13v-02-Hen—fe2c4—2018        | -3246.892488 | 103.8 |
| 3047 | 13v-02-Hen—fe2c4—1364        | -3246.892429 | 103.8 |
| 3048 | 13v-02-Hen—fe2c4—1493        | -3246.892345 | 103.9 |
| 3049 | 13v-01-Doc—fe2c4—1160        | -3246.892237 | 103.9 |
| 3050 | 13v-01-Doc—fe2c4—440         | -3246.892178 | 104.0 |
| 3051 | 13v-04-CapHexAnPr—fe2c4—2902 | -3246.89209  | 104.0 |
| 3052 | 13v-01-Doc—fe2c4—617         | -3246.892071 | 104.0 |
| 3053 | 13v-04-CapHexAnPr—fe2c4—3160 | -3246.89202  | 104.1 |
| 3054 | 13v-01-Doc—fe2c4—12          | -3246.892015 | 104.1 |
| 3055 | 13v-02-Hen—fe2c4—2013        | -3246.891995 | 104.1 |
| 3056 | 13v-01-Doc—fe2c4—895         | -3246.891976 | 104.1 |
| 3057 | 13v-04-CapHexAnPr—fe2c4—3090 | -3246.89191  | 104.2 |

|      |                              |              |       |
|------|------------------------------|--------------|-------|
| 3058 | 13v-03-DitrapIcos—fe2c4—2628 | -3246.8919   | 104.2 |
| 3059 | 13v-01-Doc—fe2c4—1166        | -3246.89189  | 104.2 |
| 3060 | 13v-03-DitrapIcos—fe2c4—2090 | -3246.891879 | 104.2 |
| 3061 | 13v-04-CapHexAnPr—fe2c4—3565 | -3246.891757 | 104.2 |
| 3062 | 13v-04-CapHexAnPr—fe2c4—3559 | -3246.891749 | 104.3 |
| 3063 | 13v-03-DitrapIcos—fe2c4—2495 | -3246.891732 | 104.3 |
| 3064 | 13v-01-Doc—fe2c4—884         | -3246.891705 | 104.3 |
| 3065 | 13v-01-Doc—fe2c4—181         | -3246.891675 | 104.3 |
| 3066 | 13v-04-CapHexAnPr—fe2c4—2920 | -3246.891669 | 104.3 |
| 3067 | 13v-01-Doc—fe2c4—441         | -3246.891642 | 104.3 |
| 3068 | 13v-03-DitrapIcos—fe2c4—2291 | -3246.891592 | 104.3 |
| 3069 | 13v-01-Doc—fe2c4—637         | -3246.891537 | 104.4 |
| 3070 | 13v-04-CapHexAnPr—fe2c4—3088 | -3246.891532 | 104.4 |
| 3071 | 13v-03-DitrapIcos—fe2c4—2345 | -3246.891401 | 104.5 |
| 3072 | 13v-04-CapHexAnPr—fe2c4—3028 | -3246.891367 | 104.5 |
| 3073 | 13v-04-CapHexAnPr—fe2c4—3316 | -3246.891246 | 104.6 |
| 3074 | 13v-04-CapHexAnPr—fe2c4—3291 | -3246.891223 | 104.6 |
| 3075 | 13v-04-CapHexAnPr—fe2c4—3382 | -3246.891072 | 104.7 |
| 3076 | 13v-04-CapHexAnPr—fe2c4—3103 | -3246.891012 | 104.7 |
| 3077 | 13v-04-CapHexAnPr—fe2c4—3060 | -3246.890946 | 104.8 |
| 3078 | 13v-01-Doc—fe2c4—158         | -3246.890809 | 104.8 |
| 3079 | 13v-04-CapHexAnPr—fe2c4—3574 | -3246.890731 | 104.9 |
| 3080 | 13v-04-CapHexAnPr—fe2c4—3026 | -3246.890704 | 104.9 |
| 3081 | 13v-04-CapHexAnPr—fe2c4—3449 | -3246.89067  | 104.9 |
| 3082 | 13v-04-CapHexAnPr—fe2c4—3544 | -3246.890562 | 105.0 |
| 3083 | 13v-04-CapHexAnPr—fe2c4—3277 | -3246.890515 | 105.0 |
| 3084 | 13v-04-CapHexAnPr—fe2c4—3545 | -3246.890257 | 105.2 |
| 3085 | 13v-02-Hen—fe2c4—1387        | -3246.889995 | 105.4 |
| 3086 | 13v-04-CapHexAnPr—fe2c4—3336 | -3246.889657 | 105.6 |
| 3087 | 13v-04-CapHexAnPr—fe2c4—3415 | -3246.889642 | 105.6 |
| 3088 | 13v-04-CapHexAnPr—fe2c4—3144 | -3246.889632 | 105.6 |
| 3089 | 13v-01-Doc—fe2c4—219         | -3246.889597 | 105.6 |
| 3090 | 13v-04-CapHexAnPr—fe2c4—3283 | -3246.889595 | 105.6 |
| 3091 | 13v-04-CapHexAnPr—fe2c4—2897 | -3246.88958  | 105.6 |
| 3092 | 13v-04-CapHexAnPr—fe2c4—3019 | -3246.889496 | 105.7 |
| 3093 | 13v-04-CapHexAnPr—fe2c4—3420 | -3246.889425 | 105.7 |
| 3094 | 13v-04-CapHexAnPr—fe2c4—3573 | -3246.889199 | 105.9 |
| 3095 | 13v-03-DitrapIcos—fe2c4—2310 | -3246.889112 | 105.9 |
| 3096 | 13v-04-CapHexAnPr—fe2c4—3418 | -3246.888941 | 106.0 |
| 3097 | 13v-03-DitrapIcos—fe2c4—2478 | -3246.888678 | 106.2 |
| 3098 | 13v-01-Doc—fe2c4—222         | -3246.888656 | 106.2 |
| 3099 | 13v-03-DitrapIcos—fe2c4—2331 | -3246.8886   | 106.2 |
| 3100 | 13v-04-CapHexAnPr—fe2c4—3044 | -3246.888598 | 106.2 |
| 3101 | 13v-01-Doc—fe2c4—289         | -3246.888588 | 106.2 |
| 3102 | 13v-01-Doc—fe2c4—266         | -3246.888557 | 106.3 |
| 3103 | 13v-02-Hen—fe2c4—1808        | -3246.888536 | 106.3 |
| 3104 | 13v-04-CapHexAnPr—fe2c4—3495 | -3246.888467 | 106.3 |
| 3105 | 13v-03-DitrapIcos—fe2c4—2289 | -3246.888464 | 106.3 |
| 3106 | 13v-01-Doc—fe2c4—311         | -3246.888375 | 106.4 |
| 3107 | 13v-04-CapHexAnPr—fe2c4—3252 | -3246.88835  | 106.4 |
| 3108 | 13v-04-CapHexAnPr—fe2c4—3262 | -3246.888265 | 106.4 |

|      |                              |              |       |
|------|------------------------------|--------------|-------|
| 3109 | 13v-03-DitrapIcos—fe2c4—2767 | -3246.888117 | 106.5 |
| 3110 | 13v-04-CapHexAnPr—fe2c4—3387 | -3246.888069 | 106.6 |
| 3111 | 13v-04-CapHexAnPr—fe2c4—3474 | -3246.888007 | 106.6 |
| 3112 | 13v-03-DitrapIcos—fe2c4—2115 | -3246.887973 | 106.6 |
| 3113 | 13v-02-Hen—fe2c4—1718        | -3246.887566 | 106.9 |
| 3114 | 13v-01-Doc—fe2c4—85          | -3246.887532 | 106.9 |
| 3115 | 13v-01-Doc—fe2c4—147         | -3246.8875   | 106.9 |
| 3116 | 13v-03-DitrapIcos—fe2c4—2400 | -3246.887332 | 107.0 |
| 3117 | 13v-03-DitrapIcos—fe2c4—2309 | -3246.88732  | 107.0 |
| 3118 | 13v-01-Doc—fe2c4—485         | -3246.887273 | 107.1 |
| 3119 | 13v-04-CapHexAnPr—fe2c4—3128 | -3246.887184 | 107.1 |
| 3120 | 13v-02-Hen—fe2c4—1525        | -3246.887168 | 107.1 |
| 3121 | 13v-04-CapHexAnPr—fe2c4—2890 | -3246.88706  | 107.2 |
| 3122 | 13v-01-Doc—fe2c4—493         | -3246.887041 | 107.2 |
| 3123 | 13v-01-Doc—fe2c4—197         | -3246.88694  | 107.3 |
| 3124 | 13v-04-CapHexAnPr—fe2c4—3115 | -3246.886812 | 107.3 |
| 3125 | 13v-02-Hen—fe2c4—1499        | -3246.886654 | 107.4 |
| 3126 | 13v-04-CapHexAnPr—fe2c4—3073 | -3246.886629 | 107.5 |
| 3127 | 13v-04-CapHexAnPr—fe2c4—3057 | -3246.886623 | 107.5 |
| 3128 | 13v-01-Doc—fe2c4—80          | -3246.886595 | 107.5 |
| 3129 | 13v-01-Doc—fe2c4—1071        | -3246.886303 | 107.7 |
| 3130 | 13v-04-CapHexAnPr—fe2c4—3572 | -3246.886291 | 107.7 |
| 3131 | 13v-04-CapHexAnPr—fe2c4—3280 | -3246.886265 | 107.7 |
| 3132 | 13v-02-Hen—fe2c4—1351        | -3246.886234 | 107.7 |
| 3133 | 13v-01-Doc—fe2c4—931         | -3246.886015 | 107.8 |
| 3134 | 13v-04-CapHexAnPr—fe2c4—3588 | -3246.886001 | 107.9 |
| 3135 | 13v-03-DitrapIcos—fe2c4—2761 | -3246.885994 | 107.9 |
| 3136 | 13v-04-CapHexAnPr—fe2c4—2892 | -3246.885908 | 107.9 |
| 3137 | 13v-03-DitrapIcos—fe2c4—2266 | -3246.885582 | 108.1 |
| 3138 | 13v-01-Doc—fe2c4—286         | -3246.885514 | 108.2 |
| 3139 | 13v-01-Doc—fe2c4—259         | -3246.885236 | 108.3 |
| 3140 | 13v-04-CapHexAnPr—fe2c4—3034 | -3246.885224 | 108.3 |
| 3141 | 13v-01-Doc—fe2c4—393         | -3246.884937 | 108.5 |
| 3142 | 13v-01-Doc—fe2c4—747         | -3246.884909 | 108.5 |
| 3143 | 13v-03-DitrapIcos—fe2c4—2119 | -3246.884862 | 108.6 |
| 3144 | 13v-01-Doc—fe2c4—659         | -3246.884811 | 108.6 |
| 3145 | 13v-04-CapHexAnPr—fe2c4—3036 | -3246.884806 | 108.6 |
| 3146 | 13v-02-Hen—fe2c4—1515        | -3246.884746 | 108.6 |
| 3147 | 13v-04-CapHexAnPr—fe2c4—3533 | -3246.88466  | 108.7 |
| 3148 | 13v-01-Doc—fe2c4—416         | -3246.884655 | 108.7 |
| 3149 | 13v-01-Doc—fe2c4—559         | -3246.884565 | 108.8 |
| 3150 | 13v-04-CapHexAnPr—fe2c4—2934 | -3246.884561 | 108.8 |
| 3151 | 13v-01-Doc—fe2c4—56          | -3246.884534 | 108.8 |
| 3152 | 13v-04-CapHexAnPr—fe2c4—2939 | -3246.884534 | 108.8 |
| 3153 | 13v-02-Hen—fe2c4—1489        | -3246.884496 | 108.8 |
| 3154 | 13v-03-DitrapIcos—fe2c4—2177 | -3246.884458 | 108.8 |
| 3155 | 13v-03-DitrapIcos—fe2c4—2244 | -3246.88434  | 108.9 |
| 3156 | 13v-01-Doc—fe2c4—720         | -3246.884264 | 108.9 |
| 3157 | 13v-02-Hen—fe2c4—1911        | -3246.884227 | 109.0 |
| 3158 | 13v-02-Hen—fe2c4—1334        | -3246.88419  | 109.0 |
| 3159 | 13v-04-CapHexAnPr—fe2c4—3205 | -3246.884142 | 109.0 |

|      |                              |              |       |
|------|------------------------------|--------------|-------|
| 3160 | 13v-04-CapHexAnPr—fe2c4—3587 | -3246.884103 | 109.0 |
| 3161 | 13v-04-CapHexAnPr—fe2c4—3110 | -3246.884093 | 109.1 |
| 3162 | 13v-03-DitrapIcos—fe2c4—2733 | -3246.884075 | 109.1 |
| 3163 | 13v-04-CapHexAnPr—fe2c4—3589 | -3246.884053 | 109.1 |
| 3164 | 13v-04-CapHexAnPr—fe2c4—3521 | -3246.884018 | 109.1 |
| 3165 | 13v-04-CapHexAnPr—fe2c4—3145 | -3246.883881 | 109.2 |
| 3166 | 13v-01-Doc—fe2c4—50          | -3246.883859 | 109.2 |
| 3167 | 13v-03-DitrapIcos—fe2c4—2112 | -3246.88384  | 109.2 |
| 3168 | 13v-03-DitrapIcos—fe2c4—2588 | -3246.883785 | 109.2 |
| 3169 | 13v-04-CapHexAnPr—fe2c4—3351 | -3246.883768 | 109.3 |
| 3170 | 13v-04-CapHexAnPr—fe2c4—3117 | -3246.88371  | 109.3 |
| 3171 | 13v-02-Hen—fe2c4—1553        | -3246.88361  | 109.4 |
| 3172 | 13v-03-DitrapIcos—fe2c4—2192 | -3246.883517 | 109.4 |
| 3173 | 13v-04-CapHexAnPr—fe2c4—3518 | -3246.883471 | 109.4 |
| 3174 | 13v-01-Doc—fe2c4—459         | -3246.883459 | 109.5 |
| 3175 | 13v-04-CapHexAnPr—fe2c4—3178 | -3246.883446 | 109.5 |
| 3176 | 13v-01-Doc—fe2c4—1038        | -3246.883405 | 109.5 |
| 3177 | 13v-04-CapHexAnPr—fe2c4—3045 | -3246.883296 | 109.6 |
| 3178 | 13v-01-Doc—fe2c4—1031        | -3246.883193 | 109.6 |
| 3179 | 13v-04-CapHexAnPr—fe2c4—3095 | -3246.883109 | 109.7 |
| 3180 | 13v-04-CapHexAnPr—fe2c4—3139 | -3246.883087 | 109.7 |
| 3181 | 13v-02-Hen—fe2c4—1743        | -3246.882968 | 109.8 |
| 3182 | 13v-01-Doc—fe2c4—763         | -3246.882929 | 109.8 |
| 3183 | 13v-01-Doc—fe2c4—180         | -3246.882881 | 109.8 |
| 3184 | 13v-03-DitrapIcos—fe2c4—2166 | -3246.882803 | 109.9 |
| 3185 | 13v-01-Doc—fe2c4—394         | -3246.882719 | 109.9 |
| 3186 | 13v-04-CapHexAnPr—fe2c4—3050 | -3246.882612 | 110.0 |
| 3187 | 13v-04-CapHexAnPr—fe2c4—3463 | -3246.882601 | 110.0 |
| 3188 | 13v-04-CapHexAnPr—fe2c4—2936 | -3246.882582 | 110.0 |
| 3189 | 13v-01-Doc—fe2c4—299         | -3246.882577 | 110.0 |
| 3190 | 13v-01-Doc—fe2c4—212         | -3246.882536 | 110.0 |
| 3191 | 13v-01-Doc—fe2c4—88          | -3246.882418 | 110.1 |
| 3192 | 13v-02-Hen—fe2c4—1690        | -3246.882364 | 110.1 |
| 3193 | 13v-04-CapHexAnPr—fe2c4—2989 | -3246.882306 | 110.2 |
| 3194 | 13v-01-Doc—fe2c4—106         | -3246.882276 | 110.2 |
| 3195 | 13v-01-Doc—fe2c4—782         | -3246.882102 | 110.3 |
| 3196 | 13v-01-Doc—fe2c4—298         | -3246.882082 | 110.3 |
| 3197 | 13v-04-CapHexAnPr—fe2c4—3106 | -3246.882038 | 110.3 |
| 3198 | 13v-04-CapHexAnPr—fe2c4—3082 | -3246.881904 | 110.4 |
| 3199 | 13v-01-Doc—fe2c4—445         | -3246.881888 | 110.4 |
| 3200 | 13v-01-Doc—fe2c4—215         | -3246.881872 | 110.4 |
| 3201 | 13v-01-Doc—fe2c4—532         | -3246.88177  | 110.5 |
| 3202 | 13v-04-CapHexAnPr—fe2c4—3196 | -3246.881701 | 110.6 |
| 3203 | 13v-01-Doc—fe2c4—260         | -3246.881699 | 110.6 |
| 3204 | 13v-03-DitrapIcos—fe2c4—2254 | -3246.881694 | 110.6 |
| 3205 | 13v-03-DitrapIcos—fe2c4—2279 | -3246.881643 | 110.6 |
| 3206 | 13v-02-Hen—fe2c4—1579        | -3246.881493 | 110.7 |
| 3207 | 13v-03-DitrapIcos—fe2c4—2167 | -3246.88144  | 110.7 |
| 3208 | 13v-04-CapHexAnPr—fe2c4—3507 | -3246.881415 | 110.7 |
| 3209 | 13v-01-Doc—fe2c4—505         | -3246.881392 | 110.8 |
| 3210 | 13v-01-Doc—fe2c4—500         | -3246.881389 | 110.8 |

|      |                              |              |       |
|------|------------------------------|--------------|-------|
| 3211 | 13v-04-CapHexAnPr—fe2c4—3479 | -3246.88137  | 110.8 |
| 3212 | 13v-01-Doc—fe2c4—570         | -3246.881316 | 110.8 |
| 3213 | 13v-01-Doc—fe2c4—185         | -3246.881246 | 110.8 |
| 3214 | 13v-03-DitrapIcos—fe2c4—2539 | -3246.881196 | 110.9 |
| 3215 | 13v-01-Doc—fe2c4—231         | -3246.88106  | 111.0 |
| 3216 | 13v-01-Doc—fe2c4—175         | -3246.88095  | 111.0 |
| 3217 | 13v-01-Doc—fe2c4—243         | -3246.880842 | 111.1 |
| 3218 | 13v-04-CapHexAnPr—fe2c4—3025 | -3246.880717 | 111.2 |
| 3219 | 13v-04-CapHexAnPr—fe2c4—3040 | -3246.880292 | 111.4 |
| 3220 | 13v-02-Hen—fe2c4—1926        | -3246.880246 | 111.5 |
| 3221 | 13v-04-CapHexAnPr—fe2c4—3388 | -3246.880208 | 111.5 |
| 3222 | 13v-04-CapHexAnPr—fe2c4—2914 | -3246.880196 | 111.5 |
| 3223 | 13v-02-Hen—fe2c4—1914        | -3246.880176 | 111.5 |
| 3224 | 13v-03-DitrapIcos—fe2c4—2378 | -3246.879896 | 111.7 |
| 3225 | 13v-01-Doc—fe2c4—62          | -3246.879889 | 111.7 |
| 3226 | 13v-01-Doc—fe2c4—300         | -3246.879607 | 111.9 |
| 3227 | 13v-03-DitrapIcos—fe2c4—2810 | -3246.879574 | 111.9 |
| 3228 | 13v-02-Hen—fe2c4—1751        | -3246.879563 | 111.9 |
| 3229 | 13v-04-CapHexAnPr—fe2c4—3030 | -3246.879551 | 111.9 |
| 3230 | 13v-02-Hen—fe2c4—1346        | -3246.879542 | 111.9 |
| 3231 | 13v-04-CapHexAnPr—fe2c4—3261 | -3246.879442 | 112.0 |
| 3232 | 13v-03-DitrapIcos—fe2c4—2828 | -3246.879433 | 112.0 |
| 3233 | 13v-01-Doc—fe2c4—481         | -3246.879321 | 112.0 |
| 3234 | 13v-03-DitrapIcos—fe2c4—2348 | -3246.879206 | 112.1 |
| 3235 | 13v-04-CapHexAnPr—fe2c4—3113 | -3246.879053 | 112.2 |
| 3236 | 13v-02-Hen—fe2c4—1606        | -3246.879052 | 112.2 |
| 3237 | 13v-02-Hen—fe2c4—1920        | -3246.878973 | 112.3 |
| 3238 | 13v-01-Doc—fe2c4—303         | -3246.878918 | 112.3 |
| 3239 | 13v-04-CapHexAnPr—fe2c4—3503 | -3246.878664 | 112.5 |
| 3240 | 13v-01-Doc—fe2c4—177         | -3246.878575 | 112.5 |
| 3241 | 13v-04-CapHexAnPr—fe2c4—3176 | -3246.878559 | 112.5 |
| 3242 | 13v-04-CapHexAnPr—fe2c4—3189 | -3246.878408 | 112.6 |
| 3243 | 13v-04-CapHexAnPr—fe2c4—3195 | -3246.878344 | 112.7 |
| 3244 | 13v-04-CapHexAnPr—fe2c4—3142 | -3246.878157 | 112.8 |
| 3245 | 13v-01-Doc—fe2c4—1215        | -3246.878047 | 112.8 |
| 3246 | 13v-04-CapHexAnPr—fe2c4—3562 | -3246.878045 | 112.9 |
| 3247 | 13v-01-Doc—fe2c4—568         | -3246.878008 | 112.9 |
| 3248 | 13v-01-Doc—fe2c4—1234        | -3246.877892 | 112.9 |
| 3249 | 13v-04-CapHexAnPr—fe2c4—3074 | -3246.877887 | 112.9 |
| 3250 | 13v-04-CapHexAnPr—fe2c4—3052 | -3246.8778   | 113.0 |
| 3251 | 13v-01-Doc—fe2c4—732         | -3246.877763 | 113.0 |
| 3252 | 13v-01-Doc—fe2c4—52          | -3246.877673 | 113.1 |
| 3253 | 13v-03-DitrapIcos—fe2c4—2857 | -3246.877672 | 113.1 |
| 3254 | 13v-03-DitrapIcos—fe2c4—2274 | -3246.877646 | 113.1 |
| 3255 | 13v-04-CapHexAnPr—fe2c4—2975 | -3246.877597 | 113.1 |
| 3256 | 13v-04-CapHexAnPr—fe2c4—2933 | -3246.877384 | 113.3 |
| 3257 | 13v-03-DitrapIcos—fe2c4—2752 | -3246.877162 | 113.4 |
| 3258 | 13v-04-CapHexAnPr—fe2c4—3033 | -3246.877095 | 113.4 |
| 3259 | 13v-02-Hen—fe2c4—1327        | -3246.877076 | 113.5 |
| 3260 | 13v-04-CapHexAnPr—fe2c4—3094 | -3246.876933 | 113.5 |
| 3261 | 13v-04-CapHexAnPr—fe2c4—3143 | -3246.87693  | 113.6 |

|      |                              |              |       |
|------|------------------------------|--------------|-------|
| 3262 | 13v-04-CapHexAnPr—fe2c4—3174 | -3246.876796 | 113.6 |
| 3263 | 13v-04-CapHexAnPr—fe2c4—2895 | -3246.876646 | 113.7 |
| 3264 | 13v-01-Doc—fe2c4—527         | -3246.876575 | 113.8 |
| 3265 | 13v-03-DitrapIcos—fe2c4—2550 | -3246.876543 | 113.8 |
| 3266 | 13v-01-Doc—fe2c4—520         | -3246.876481 | 113.8 |
| 3267 | 13v-01-Doc—fe2c4—486         | -3246.876431 | 113.9 |
| 3268 | 13v-03-DitrapIcos—fe2c4—2653 | -3246.876311 | 113.9 |
| 3269 | 13v-02-Hen—fe2c4—1333        | -3246.876233 | 114.0 |
| 3270 | 13v-01-Doc—fe2c4—161         | -3246.876152 | 114.0 |
| 3271 | 13v-04-CapHexAnPr—fe2c4—3003 | -3246.876119 | 114.1 |
| 3272 | 13v-01-Doc—fe2c4—1164        | -3246.876074 | 114.1 |
| 3273 | 13v-04-CapHexAnPr—fe2c4—3249 | -3246.876052 | 114.1 |
| 3274 | 13v-01-Doc—fe2c4—63          | -3246.876005 | 114.1 |
| 3275 | 13v-02-Hen—fe2c4—1746        | -3246.875875 | 114.2 |
| 3276 | 13v-01-Doc—fe2c4—1194        | -3246.875847 | 114.2 |
| 3277 | 13v-01-Doc—fe2c4—389         | -3246.875832 | 114.2 |
| 3278 | 13v-04-CapHexAnPr—fe2c4—3232 | -3246.875822 | 114.2 |
| 3279 | 13v-03-DitrapIcos—fe2c4—2804 | -3246.875422 | 114.5 |
| 3280 | 13v-03-DitrapIcos—fe2c4—2554 | -3246.875366 | 114.5 |
| 3281 | 13v-01-Doc—fe2c4—71          | -3246.875358 | 114.5 |
| 3282 | 13v-03-DitrapIcos—fe2c4—2789 | -3246.875124 | 114.7 |
| 3283 | 13v-04-CapHexAnPr—fe2c4—3287 | -3246.875079 | 114.7 |
| 3284 | 13v-02-Hen—fe2c4—1349        | -3246.874984 | 114.8 |
| 3285 | 13v-04-CapHexAnPr—fe2c4—3524 | -3246.874859 | 114.8 |
| 3286 | 13v-04-CapHexAnPr—fe2c4—3308 | -3246.874838 | 114.9 |
| 3287 | 13v-01-Doc—fe2c4—924         | -3246.874831 | 114.9 |
| 3288 | 13v-03-DitrapIcos—fe2c4—2137 | -3246.874774 | 114.9 |
| 3289 | 13v-01-Doc—fe2c4—319         | -3246.874746 | 114.9 |
| 3290 | 13v-02-Hen—fe2c4—1744        | -3246.87471  | 114.9 |
| 3291 | 13v-04-CapHexAnPr—fe2c4—3525 | -3246.874683 | 115.0 |
| 3292 | 13v-01-Doc—fe2c4—93          | -3246.874671 | 115.0 |
| 3293 | 13v-04-CapHexAnPr—fe2c4—3393 | -3246.87447  | 115.1 |
| 3294 | 13v-04-CapHexAnPr—fe2c4—3059 | -3246.874379 | 115.2 |
| 3295 | 13v-01-Doc—fe2c4—203         | -3246.874355 | 115.2 |
| 3296 | 13v-02-Hen—fe2c4—1496        | -3246.874331 | 115.2 |
| 3297 | 13v-04-CapHexAnPr—fe2c4—3089 | -3246.874282 | 115.2 |
| 3298 | 13v-04-CapHexAnPr—fe2c4—3416 | -3246.874088 | 115.3 |
| 3299 | 13v-04-CapHexAnPr—fe2c4—3054 | -3246.873998 | 115.4 |
| 3300 | 13v-03-DitrapIcos—fe2c4—2750 | -3246.873938 | 115.4 |
| 3301 | 13v-03-DitrapIcos—fe2c4—2114 | -3246.873911 | 115.4 |
| 3302 | 13v-01-Doc—fe2c4—494         | -3246.873796 | 115.5 |
| 3303 | 13v-04-CapHexAnPr—fe2c4—3282 | -3246.873689 | 115.6 |
| 3304 | 13v-01-Doc—fe2c4—496         | -3246.873673 | 115.6 |
| 3305 | 13v-03-DitrapIcos—fe2c4—2317 | -3246.873624 | 115.6 |
| 3306 | 13v-03-DitrapIcos—fe2c4—2195 | -3246.873496 | 115.7 |
| 3307 | 13v-04-CapHexAnPr—fe2c4—3293 | -3246.87348  | 115.7 |
| 3308 | 13v-04-CapHexAnPr—fe2c4—3321 | -3246.873299 | 115.8 |
| 3309 | 13v-01-Doc—fe2c4—75          | -3246.873235 | 115.9 |
| 3310 | 13v-02-Hen—fe2c4—1350        | -3246.873219 | 115.9 |
| 3311 | 13v-04-CapHexAnPr—fe2c4—3517 | -3246.873094 | 116.0 |
| 3312 | 13v-03-DitrapIcos—fe2c4—2230 | -3246.873009 | 116.0 |



|      |                              |              |       |
|------|------------------------------|--------------|-------|
| 3313 | 13v-04-CapHexAnPr—fe2c4—3023 | -3246.873007 | 116.0 |
| 3314 | 13v-03-DitrapIcos—fe2c4—2173 | -3246.872899 | 116.1 |
| 3315 | 13v-03-DitrapIcos—fe2c4—2374 | -3246.872701 | 116.2 |
| 3316 | 13v-04-CapHexAnPr—fe2c4—3581 | -3246.872701 | 116.2 |
| 3317 | 13v-03-DitrapIcos—fe2c4—2126 | -3246.872667 | 116.2 |
| 3318 | 13v-01-Doc—fe2c4—1           | -3246.872662 | 116.2 |
| 3319 | 13v-04-CapHexAnPr—fe2c4—3194 | -3246.872366 | 116.4 |
| 3320 | 13v-03-DitrapIcos—fe2c4—2140 | -3246.87231  | 116.4 |
| 3321 | 13v-04-CapHexAnPr—fe2c4—3121 | -3246.87215  | 116.5 |
| 3322 | 13v-04-CapHexAnPr—fe2c4—2935 | -3246.872143 | 116.6 |
| 3323 | 13v-03-DitrapIcos—fe2c4—2389 | -3246.872107 | 116.6 |
| 3324 | 13v-01-Doc—fe2c4—522         | -3246.871948 | 116.7 |
| 3325 | 13v-01-Doc—fe2c4—510         | -3246.871917 | 116.7 |
| 3326 | 13v-03-DitrapIcos—fe2c4—2391 | -3246.871865 | 116.7 |
| 3327 | 13v-01-Doc—fe2c4—721         | -3246.871766 | 116.8 |
| 3328 | 13v-04-CapHexAnPr—fe2c4—3029 | -3246.871724 | 116.8 |
| 3329 | 13v-01-Doc—fe2c4—509         | -3246.871703 | 116.8 |
| 3330 | 13v-04-CapHexAnPr—fe2c4—3064 | -3246.871348 | 117.1 |
| 3331 | 13v-01-Doc—fe2c4—877         | -3246.871247 | 117.1 |
| 3332 | 13v-01-Doc—fe2c4—450         | -3246.871214 | 117.1 |
| 3333 | 13v-01-Doc—fe2c4—92          | -3246.870782 | 117.4 |
| 3334 | 13v-01-Doc—fe2c4—495         | -3246.870671 | 117.5 |
| 3335 | 13v-02-Hen—fe2c4—1335        | -3246.870501 | 117.6 |
| 3336 | 13v-01-Doc—fe2c4—78          | -3246.870451 | 117.6 |
| 3337 | 13v-04-CapHexAnPr—fe2c4—3079 | -3246.8703   | 117.7 |
| 3338 | 13v-04-CapHexAnPr—fe2c4—3326 | -3246.870052 | 117.9 |
| 3339 | 13v-01-Doc—fe2c4—542         | -3246.869829 | 118.0 |
| 3340 | 13v-04-CapHexAnPr—fe2c4—3152 | -3246.869778 | 118.0 |
| 3341 | 13v-04-CapHexAnPr—fe2c4—3198 | -3246.869282 | 118.3 |
| 3342 | 13v-04-CapHexAnPr—fe2c4—3183 | -3246.869186 | 118.4 |
| 3343 | 13v-01-Doc—fe2c4—506         | -3246.868978 | 118.5 |
| 3344 | 13v-04-CapHexAnPr—fe2c4—3295 | -3246.868924 | 118.6 |
| 3345 | 13v-01-Doc—fe2c4—573         | -3246.868832 | 118.6 |
| 3346 | 13v-02-Hen—fe2c4—1484        | -3246.868499 | 118.8 |
| 3347 | 13v-04-CapHexAnPr—fe2c4—3006 | -3246.868243 | 119.0 |
| 3348 | 13v-04-CapHexAnPr—fe2c4—3367 | -3246.868188 | 119.0 |
| 3349 | 13v-02-Hen—fe2c4—1347        | -3246.868034 | 119.1 |
| 3350 | 13v-01-Doc—fe2c4—96          | -3246.868    | 119.2 |
| 3351 | 13v-01-Doc—fe2c4—82          | -3246.867983 | 119.2 |
| 3352 | 13v-01-Doc—fe2c4—54          | -3246.867897 | 119.2 |
| 3353 | 13v-03-DitrapIcos—fe2c4—2674 | -3246.867888 | 119.2 |
| 3354 | 13v-03-DitrapIcos—fe2c4—2136 | -3246.867868 | 119.2 |
| 3355 | 13v-03-DitrapIcos—fe2c4—2556 | -3246.867796 | 119.3 |
| 3356 | 13v-04-CapHexAnPr—fe2c4—3078 | -3246.867736 | 119.3 |
| 3357 | 13v-04-CapHexAnPr—fe2c4—3099 | -3246.867629 | 119.4 |
| 3358 | 13v-04-CapHexAnPr—fe2c4—3575 | -3246.867591 | 119.4 |
| 3359 | 13v-03-DitrapIcos—fe2c4—2650 | -3246.867552 | 119.4 |
| 3360 | 13v-01-Doc—fe2c4—70          | -3246.867464 | 119.5 |
| 3361 | 13v-04-CapHexAnPr—fe2c4—3133 | -3246.867458 | 119.5 |
| 3362 | 13v-04-CapHexAnPr—fe2c4—3063 | -3246.867349 | 119.6 |
| 3363 | 13v-01-Doc—fe2c4—195         | -3246.867235 | 119.6 |

|      |                              |              |       |
|------|------------------------------|--------------|-------|
| 3364 | 13v-04-CapHexAnPr—fe2c4—2918 | -3246.866918 | 119.8 |
| 3365 | 13v-01-Doc—fe2c4—58          | -3246.866612 | 120.0 |
| 3366 | 13v-03-DitrapIcos—fe2c4—2587 | -3246.866601 | 120.0 |
| 3367 | 13v-01-Doc—fe2c4—73          | -3246.866563 | 120.1 |
| 3368 | 13v-04-CapHexAnPr—fe2c4—2915 | -3246.866465 | 120.1 |
| 3369 | 13v-01-Doc—fe2c4—553         | -3246.866447 | 120.1 |
| 3370 | 13v-04-CapHexAnPr—fe2c4—3413 | -3246.866104 | 120.3 |
| 3371 | 13v-04-CapHexAnPr—fe2c4—3390 | -3246.865915 | 120.5 |
| 3372 | 13v-03-DitrapIcos—fe2c4—2388 | -3246.865892 | 120.5 |
| 3373 | 13v-01-Doc—fe2c4—306         | -3246.865888 | 120.5 |
| 3374 | 13v-04-CapHexAnPr—fe2c4—2984 | -3246.865575 | 120.7 |
| 3375 | 13v-01-Doc—fe2c4—421         | -3246.865549 | 120.7 |
| 3376 | 13v-01-Doc—fe2c4—241         | -3246.86544  | 120.8 |
| 3377 | 13v-03-DitrapIcos—fe2c4—2583 | -3246.865399 | 120.8 |
| 3378 | 13v-02-Hen—fe2c4—1488        | -3246.865047 | 121.0 |
| 3379 | 13v-04-CapHexAnPr—fe2c4—3510 | -3246.865029 | 121.0 |
| 3380 | 13v-01-Doc—fe2c4—186         | -3246.864971 | 121.1 |
| 3381 | 13v-01-Doc—fe2c4—74          | -3246.864621 | 121.3 |
| 3382 | 13v-04-CapHexAnPr—fe2c4—3130 | -3246.864618 | 121.3 |
| 3383 | 13v-01-Doc—fe2c4—474         | -3246.864244 | 121.5 |
| 3384 | 13v-04-CapHexAnPr—fe2c4—3005 | -3246.864006 | 121.7 |
| 3385 | 13v-04-CapHexAnPr—fe2c4—3512 | -3246.863989 | 121.7 |
| 3386 | 13v-01-Doc—fe2c4—216         | -3246.863884 | 121.7 |
| 3387 | 13v-04-CapHexAnPr—fe2c4—3053 | -3246.863767 | 121.8 |
| 3388 | 13v-01-Doc—fe2c4—214         | -3246.863561 | 121.9 |
| 3389 | 13v-04-CapHexAnPr—fe2c4—2925 | -3246.86352  | 122.0 |
| 3390 | 13v-01-Doc—fe2c4—283         | -3246.863457 | 122.0 |
| 3391 | 13v-01-Doc—fe2c4—157         | -3246.863321 | 122.1 |
| 3392 | 13v-01-Doc—fe2c4—324         | -3246.863249 | 122.1 |
| 3393 | 13v-03-DitrapIcos—fe2c4—2827 | -3246.863221 | 122.2 |
| 3394 | 13v-02-Hen—fe2c4—1715        | -3246.863143 | 122.2 |
| 3395 | 13v-01-Doc—fe2c4—1162        | -3246.863111 | 122.2 |
| 3396 | 13v-01-Doc—fe2c4—190         | -3246.863062 | 122.3 |
| 3397 | 13v-01-Doc—fe2c4—722         | -3246.863042 | 122.3 |
| 3398 | 13v-01-Doc—fe2c4—541         | -3246.862912 | 122.3 |
| 3399 | 13v-01-Doc—fe2c4—682         | -3246.862727 | 122.5 |
| 3400 | 13v-01-Doc—fe2c4—254         | -3246.862724 | 122.5 |
| 3401 | 13v-04-CapHexAnPr—fe2c4—3140 | -3246.862646 | 122.5 |
| 3402 | 13v-02-Hen—fe2c4—1802        | -3246.862578 | 122.6 |
| 3403 | 13v-02-Hen—fe2c4—1345        | -3246.862455 | 122.6 |
| 3404 | 13v-03-DitrapIcos—fe2c4—2528 | -3246.861286 | 123.4 |
| 3405 | 13v-04-CapHexAnPr—fe2c4—3322 | -3246.861176 | 123.4 |
| 3406 | 13v-03-DitrapIcos—fe2c4—2174 | -3246.861095 | 123.5 |
| 3407 | 13v-04-CapHexAnPr—fe2c4—3353 | -3246.86063  | 123.8 |
| 3408 | 13v-03-DitrapIcos—fe2c4—2283 | -3246.860424 | 123.9 |
| 3409 | 13v-02-Hen—fe2c4—1432        | -3246.860369 | 123.9 |
| 3410 | 13v-01-Doc—fe2c4—447         | -3246.860352 | 124.0 |
| 3411 | 13v-04-CapHexAnPr—fe2c4—3084 | -3246.86011  | 124.1 |
| 3412 | 13v-02-Hen—fe2c4—1328        | -3246.859815 | 124.3 |
| 3413 | 13v-01-Doc—fe2c4—201         | -3246.859661 | 124.4 |
| 3414 | 13v-04-CapHexAnPr—fe2c4—3509 | -3246.859417 | 124.5 |

|      |                              |              |       |
|------|------------------------------|--------------|-------|
| 3415 | 13v-03-DitrapIcos—fe2c4—2146 | -3246.859371 | 124.6 |
| 3416 | 13v-03-DitrapIcos—fe2c4—2361 | -3246.859356 | 124.6 |
| 3417 | 13v-01-Doc—fe2c4—239         | -3246.859168 | 124.7 |
| 3418 | 13v-04-CapHexAnPr—fe2c4—3072 | -3246.859114 | 124.7 |
| 3419 | 13v-01-Doc—fe2c4—209         | -3246.858764 | 124.9 |
| 3420 | 13v-03-DitrapIcos—fe2c4—2186 | -3246.858743 | 125.0 |
| 3421 | 13v-04-CapHexAnPr—fe2c4—3104 | -3246.858592 | 125.1 |
| 3422 | 13v-04-CapHexAnPr—fe2c4—3346 | -3246.858506 | 125.1 |
| 3423 | 13v-03-DitrapIcos—fe2c4—2263 | -3246.8585   | 125.1 |
| 3424 | 13v-01-Doc—fe2c4—301         | -3246.858116 | 125.4 |
| 3425 | 13v-01-Doc—fe2c4—548         | -3246.858014 | 125.4 |
| 3426 | 13v-04-CapHexAnPr—fe2c4—3310 | -3246.857996 | 125.4 |
| 3427 | 13v-03-DitrapIcos—fe2c4—2526 | -3246.857852 | 125.5 |
| 3428 | 13v-04-CapHexAnPr—fe2c4—3112 | -3246.857748 | 125.6 |
| 3429 | 13v-02-Hen—fe2c4—1495        | -3246.857714 | 125.6 |
| 3430 | 13v-01-Doc—fe2c4—193         | -3246.857601 | 125.7 |
| 3431 | 13v-02-Hen—fe2c4—1376        | -3246.857474 | 125.8 |
| 3432 | 13v-01-Doc—fe2c4—1024        | -3246.857029 | 126.0 |
| 3433 | 13v-01-Doc—fe2c4—395         | -3246.856918 | 126.1 |
| 3434 | 13v-04-CapHexAnPr—fe2c4—3031 | -3246.856895 | 126.1 |
| 3435 | 13v-04-CapHexAnPr—fe2c4—3273 | -3246.85662  | 126.3 |
| 3436 | 13v-01-Doc—fe2c4—530         | -3246.856477 | 126.4 |
| 3437 | 13v-04-CapHexAnPr—fe2c4—3239 | -3246.856466 | 126.4 |
| 3438 | 13v-02-Hen—fe2c4—1756        | -3246.85643  | 126.4 |
| 3439 | 13v-01-Doc—fe2c4—53          | -3246.856362 | 126.5 |
| 3440 | 13v-04-CapHexAnPr—fe2c4—3105 | -3246.85556  | 127.0 |
| 3441 | 13v-04-CapHexAnPr—fe2c4—3098 | -3246.855518 | 127.0 |
| 3442 | 13v-01-Doc—fe2c4—489         | -3246.855376 | 127.1 |
| 3443 | 13v-03-DitrapIcos—fe2c4—2611 | -3246.855358 | 127.1 |
| 3444 | 13v-02-Hen—fe2c4—1483        | -3246.854822 | 127.4 |
| 3445 | 13v-02-Hen—fe2c4—1686        | -3246.854583 | 127.6 |
| 3446 | 13v-01-Doc—fe2c4—86          | -3246.854503 | 127.6 |
| 3447 | 13v-01-Doc—fe2c4—233         | -3246.854299 | 127.8 |
| 3448 | 13v-04-CapHexAnPr—fe2c4—3125 | -3246.854217 | 127.8 |
| 3449 | 13v-02-Hen—fe2c4—1485        | -3246.854172 | 127.8 |
| 3450 | 13v-04-CapHexAnPr—fe2c4—3302 | -3246.853717 | 128.1 |
| 3451 | 13v-01-Doc—fe2c4—51          | -3246.853502 | 128.3 |
| 3452 | 13v-04-CapHexAnPr—fe2c4—3290 | -3246.853488 | 128.3 |
| 3453 | 13v-04-CapHexAnPr—fe2c4—3337 | -3246.853367 | 128.3 |
| 3454 | 13v-04-CapHexAnPr—fe2c4—3137 | -3246.853348 | 128.3 |
| 3455 | 13v-04-CapHexAnPr—fe2c4—3107 | -3246.852942 | 128.6 |
| 3456 | 13v-03-DitrapIcos—fe2c4—2491 | -3246.852819 | 128.7 |
| 3457 | 13v-04-CapHexAnPr—fe2c4—3582 | -3246.852768 | 128.7 |
| 3458 | 13v-01-Doc—fe2c4—235         | -3246.852225 | 129.1 |
| 3459 | 13v-01-Doc—fe2c4—87          | -3246.851954 | 129.2 |
| 3460 | 13v-01-Doc—fe2c4—213         | -3246.851849 | 129.3 |
| 3461 | 13v-03-DitrapIcos—fe2c4—2128 | -3246.851683 | 129.4 |
| 3462 | 13v-03-DitrapIcos—fe2c4—2129 | -3246.851479 | 129.5 |
| 3463 | 13v-04-CapHexAnPr—fe2c4—3075 | -3246.85139  | 129.6 |
| 3464 | 13v-01-Doc—fe2c4—333         | -3246.851315 | 129.6 |
| 3465 | 13v-01-Doc—fe2c4—426         | -3246.851312 | 129.6 |

|      |                              |              |       |
|------|------------------------------|--------------|-------|
| 3466 | 13v-02-Hen—fe2c4—1711        | -3246.851296 | 129.6 |
| 3467 | 13v-01-Doc—fe2c4—83          | -3246.851174 | 129.7 |
| 3468 | 13v-04-CapHexAnPr—fe2c4—3076 | -3246.850951 | 129.9 |
| 3469 | 13v-04-CapHexAnPr—fe2c4—3519 | -3246.850513 | 130.1 |
| 3470 | 13v-01-Doc—fe2c4—715         | -3246.850038 | 130.4 |
| 3471 | 13v-03-DitrapIcos—fe2c4—2380 | -3246.850037 | 130.4 |
| 3472 | 13v-01-Doc—fe2c4—558         | -3246.849944 | 130.5 |
| 3473 | 13v-03-DitrapIcos—fe2c4—2395 | -3246.849902 | 130.5 |
| 3474 | 13v-03-DitrapIcos—fe2c4—2384 | -3246.849889 | 130.5 |
| 3475 | 13v-04-CapHexAnPr—fe2c4—2960 | -3246.849496 | 130.8 |
| 3476 | 13v-04-CapHexAnPr—fe2c4—2983 | -3246.849373 | 130.8 |
| 3477 | 13v-01-Doc—fe2c4—315         | -3246.849289 | 130.9 |
| 3478 | 13v-03-DitrapIcos—fe2c4—2407 | -3246.848988 | 131.1 |
| 3479 | 13v-01-Doc—fe2c4—499         | -3246.848794 | 131.2 |
| 3480 | 13v-03-DitrapIcos—fe2c4—2164 | -3246.848539 | 131.4 |
| 3481 | 13v-04-CapHexAnPr—fe2c4—2938 | -3246.848431 | 131.4 |
| 3482 | 13v-03-DitrapIcos—fe2c4—2271 | -3246.847549 | 132.0 |
| 3483 | 13v-03-DitrapIcos—fe2c4—2616 | -3246.847429 | 132.1 |
| 3484 | 13v-04-CapHexAnPr—fe2c4—3591 | -3246.847181 | 132.2 |
| 3485 | 13v-04-CapHexAnPr—fe2c4—3265 | -3246.847132 | 132.2 |
| 3486 | 13v-04-CapHexAnPr—fe2c4—3593 | -3246.847116 | 132.3 |
| 3487 | 13v-03-DitrapIcos—fe2c4—2613 | -3246.847083 | 132.3 |
| 3488 | 13v-01-Doc—fe2c4—253         | -3246.846093 | 132.9 |
| 3489 | 13v-01-Doc—fe2c4—65          | -3246.845752 | 133.1 |
| 3490 | 13v-04-CapHexAnPr—fe2c4—2917 | -3246.84543  | 133.3 |
| 3491 | 13v-04-CapHexAnPr—fe2c4—3455 | -3246.845397 | 133.3 |
| 3492 | 13v-04-CapHexAnPr—fe2c4—2898 | -3246.845122 | 133.5 |
| 3493 | 13v-01-Doc—fe2c4—482         | -3246.844778 | 133.7 |
| 3494 | 13v-03-DitrapIcos—fe2c4—2404 | -3246.844579 | 133.9 |
| 3495 | 13v-01-Doc—fe2c4—526         | -3246.844577 | 133.9 |
| 3496 | 13v-04-CapHexAnPr—fe2c4—3091 | -3246.844538 | 133.9 |
| 3497 | 13v-01-Doc—fe2c4—529         | -3246.844345 | 134.0 |
| 3498 | 13v-03-DitrapIcos—fe2c4—2340 | -3246.843691 | 134.4 |
| 3499 | 13v-04-CapHexAnPr—fe2c4—3323 | -3246.843638 | 134.4 |
| 3500 | 13v-04-CapHexAnPr—fe2c4—3085 | -3246.843596 | 134.5 |
| 3501 | 13v-03-DitrapIcos—fe2c4—2285 | -3246.843357 | 134.6 |
| 3502 | 13v-03-DitrapIcos—fe2c4—2497 | -3246.842857 | 134.9 |
| 3503 | 13v-04-CapHexAnPr—fe2c4—2941 | -3246.842657 | 135.1 |
| 3504 | 13v-02-Hen—fe2c4—1572        | -3246.842451 | 135.2 |
| 3505 | 13v-04-CapHexAnPr—fe2c4—3080 | -3246.842416 | 135.2 |
| 3506 | 13v-03-DitrapIcos—fe2c4—2252 | -3246.842205 | 135.3 |
| 3507 | 13v-04-CapHexAnPr—fe2c4—3306 | -3246.841966 | 135.5 |
| 3508 | 13v-04-CapHexAnPr—fe2c4—3102 | -3246.841958 | 135.5 |
| 3509 | 13v-04-CapHexAnPr—fe2c4—3068 | -3246.841791 | 135.6 |
| 3510 | 13v-01-Doc—fe2c4—211         | -3246.841697 | 135.7 |
| 3511 | 13v-04-CapHexAnPr—fe2c4—3048 | -3246.840866 | 136.2 |
| 3512 | 13v-04-CapHexAnPr—fe2c4—3190 | -3246.840569 | 136.4 |
| 3513 | 13v-04-CapHexAnPr—fe2c4—3066 | -3246.840408 | 136.5 |
| 3514 | 13v-04-CapHexAnPr—fe2c4—3567 | -3246.840319 | 136.5 |
| 3515 | 13v-04-CapHexAnPr—fe2c4—3067 | -3246.839875 | 136.8 |
| 3516 | 13v-01-Doc—fe2c4—72          | -3246.83936  | 137.1 |

|      |                              |              |       |
|------|------------------------------|--------------|-------|
| 3517 | 13v-03-DitrapIcos—fe2c4—2287 | -3246.839354 | 137.1 |
| 3518 | 13v-01-Doc—fe2c4—69          | -3246.83864  | 137.6 |
| 3519 | 13v-01-Doc—fe2c4—523         | -3246.83849  | 137.7 |
| 3520 | 13v-03-DitrapIcos—fe2c4—2281 | -3246.838161 | 137.9 |
| 3521 | 13v-04-CapHexAnPr—fe2c4—2932 | -3246.83774  | 138.1 |
| 3522 | 13v-04-CapHexAnPr—fe2c4—2900 | -3246.837517 | 138.3 |
| 3523 | 13v-04-CapHexAnPr—fe2c4—3100 | -3246.836191 | 139.1 |
| 3524 | 13v-04-CapHexAnPr—fe2c4—3062 | -3246.835728 | 139.4 |
| 3525 | 13v-04-CapHexAnPr—fe2c4—2907 | -3246.835654 | 139.5 |
| 3526 | 13v-03-DitrapIcos—fe2c4—2125 | -3246.835584 | 139.5 |
| 3527 | 13v-03-DitrapIcos—fe2c4—2200 | -3246.835486 | 139.6 |
| 3528 | 13v-04-CapHexAnPr—fe2c4—3077 | -3246.835378 | 139.6 |
| 3529 | 13v-03-DitrapIcos—fe2c4—2120 | -3246.835296 | 139.7 |
| 3530 | 13v-02-Hen—fe2c4—1344        | -3246.834388 | 140.2 |
| 3531 | 13v-04-CapHexAnPr—fe2c4—3333 | -3246.834295 | 140.3 |
| 3532 | 13v-04-CapHexAnPr—fe2c4—3061 | -3246.833578 | 140.8 |
| 3533 | 13v-01-Doc—fe2c4—67          | -3246.833271 | 140.9 |
| 3534 | 13v-04-CapHexAnPr—fe2c4—3292 | -3246.832984 | 141.1 |
| 3535 | 13v-04-CapHexAnPr—fe2c4—3124 | -3246.832826 | 141.2 |
| 3536 | 13v-04-CapHexAnPr—fe2c4—3111 | -3246.832741 | 141.3 |
| 3537 | 13v-04-CapHexAnPr—fe2c4—3285 | -3246.831787 | 141.9 |
| 3538 | 13v-04-CapHexAnPr—fe2c4—3071 | -3246.831202 | 142.2 |
| 3539 | 13v-04-CapHexAnPr—fe2c4—3132 | -3246.830935 | 142.4 |
| 3540 | 13v-03-DitrapIcos—fe2c4—2116 | -3246.830851 | 142.5 |
| 3541 | 13v-04-CapHexAnPr—fe2c4—3325 | -3246.830771 | 142.5 |
| 3542 | 13v-04-CapHexAnPr—fe2c4—3170 | -3246.83063  | 142.6 |
| 3543 | 13v-01-Doc—fe2c4—81          | -3246.830441 | 142.7 |
| 3544 | 13v-04-CapHexAnPr—fe2c4—3197 | -3246.830399 | 142.7 |
| 3545 | 13v-01-Doc—fe2c4—224         | -3246.830388 | 142.8 |
| 3546 | 13v-03-DitrapIcos—fe2c4—2135 | -3246.830027 | 143.0 |
| 3547 | 13v-03-DitrapIcos—fe2c4—2383 | -3246.829791 | 143.1 |
| 3548 | 13v-01-Doc—fe2c4—331         | -3246.829623 | 143.2 |
| 3549 | 13v-04-CapHexAnPr—fe2c4—2940 | -3246.829595 | 143.3 |
| 3550 | 13v-01-Doc—fe2c4—59          | -3246.82951  | 143.3 |
| 3551 | 13v-04-CapHexAnPr—fe2c4—3141 | -3246.82942  | 143.4 |
| 3552 | 13v-04-CapHexAnPr—fe2c4—2919 | -3246.82939  | 143.4 |
| 3553 | 13v-02-Hen—fe2c4—1342        | -3246.829326 | 143.4 |
| 3554 | 13v-03-DitrapIcos—fe2c4—2549 | -3246.829073 | 143.6 |
| 3555 | 13v-04-CapHexAnPr—fe2c4—3303 | -3246.828372 | 144.0 |
| 3556 | 13v-04-CapHexAnPr—fe2c4—3126 | -3246.828353 | 144.0 |
| 3557 | 13v-01-Doc—fe2c4—91          | -3246.827939 | 144.3 |
| 3558 | 13v-03-DitrapIcos—fe2c4—2134 | -3246.827371 | 144.6 |
| 3559 | 13v-03-DitrapIcos—fe2c4—2608 | -3246.82732  | 144.7 |
| 3560 | 13v-01-Doc—fe2c4—76          | -3246.827285 | 144.7 |
| 3561 | 13v-04-CapHexAnPr—fe2c4—3092 | -3246.82723  | 144.7 |
| 3562 | 13v-01-Doc—fe2c4—90          | -3246.82439  | 146.5 |
| 3563 | 13v-04-CapHexAnPr—fe2c4—3081 | -3246.822847 | 147.5 |
| 3564 | 13v-03-DitrapIcos—fe2c4—2288 | -3246.822568 | 147.7 |
| 3565 | 13v-04-CapHexAnPr—fe2c4—3129 | -3246.821776 | 148.2 |
| 3566 | 13v-04-CapHexAnPr—fe2c4—3391 | -3246.821492 | 148.3 |
| 3567 | 13v-03-DitrapIcos—fe2c4—2518 | -3246.820813 | 148.8 |

|      |                              |              |       |
|------|------------------------------|--------------|-------|
| 3568 | 13v-04-CapHexAnPr—fe2c4—3070 | -3246.820763 | 148.8 |
| 3569 | 13v-04-CapHexAnPr—fe2c4—3453 | -3246.820528 | 148.9 |
| 3570 | 13v-01-Doc—fe2c4—64          | -3246.820241 | 149.1 |
| 3571 | 13v-01-Doc—fe2c4—66          | -3246.819864 | 149.4 |
| 3572 | 13v-03-DitrapIcos—fe2c4—2223 | -3246.819284 | 149.7 |
| 3573 | 13v-04-CapHexAnPr—fe2c4—3138 | -3246.818777 | 150.0 |
| 3574 | 13v-01-Doc—fe2c4—68          | -3246.817102 | 151.1 |
| 3575 | 13v-01-Doc—fe2c4—94          | -3246.817082 | 151.1 |
| 3576 | 13v-01-Doc—fe2c4—321         | -3246.816053 | 151.8 |
| 3577 | 13v-01-Doc—fe2c4—218         | -3246.814783 | 152.5 |
| 3578 | 13v-04-CapHexAnPr—fe2c4—3134 | -3246.814712 | 152.6 |
| 3579 | 13v-04-CapHexAnPr—fe2c4—3120 | -3246.812025 | 154.3 |
| 3580 | 13v-04-CapHexAnPr—fe2c4—3087 | -3246.810298 | 155.4 |
| 3581 | 13v-02-Hen—fe2c4—1687        | -3246.808905 | 156.2 |
| 3582 | 13v-03-DitrapIcos—fe2c4—2490 | -3246.808841 | 156.3 |
| 3583 | 13v-03-DitrapIcos—fe2c4—2280 | -3246.807511 | 157.1 |
| 3584 | 13v-03-DitrapIcos—fe2c4—2124 | -3246.803324 | 159.7 |
| 3585 | 13v-03-DitrapIcos—fe2c4—2110 | -3246.803291 | 159.8 |
| 3586 | 13v-03-DitrapIcos—fe2c4—2113 | -3246.801879 | 160.6 |
| 3587 | 13v-01-Doc—fe2c4—61          | -3246.79622  | 164.2 |
| 3588 | 13v-04-CapHexAnPr—fe2c4—3069 | -3246.795697 | 164.5 |
| 3589 | 13v-03-DitrapIcos—fe2c4—2133 | -3246.78982  | 168.2 |
| 3590 | 13v-04-CapHexAnPr—fe2c4—3328 | -3246.789332 | 168.5 |
| 3591 | 13v-04-CapHexAnPr—fe2c4—3131 | -3246.769748 | 180.8 |
| 3592 | 13v-04-CapHexAnPr—fe2c4—3135 | -3246.762494 | 185.4 |
| 3593 | 13v-04-CapHexAnPr—fe2c4—3114 | -3246.755373 | 189.8 |

Table S5A: Distance table for the lowest-lying Cp<sub>2</sub>Fe<sub>2</sub>C<sub>4</sub>B<sub>4</sub>H<sub>8</sub> optimized structures obtained at the PBE0/def2-TZVP level of theory. Included are the zero-point corrected absolute energies in (a.u.), relative energies in (kcal/mol), symmetry and wiberg bond indecies. The cyclopentadienyl ligands and hydrogens are omitted for clarity.

|                                                                                                                                                          |          |          |          |          |          |          |    |
|----------------------------------------------------------------------------------------------------------------------------------------------------------|----------|----------|----------|----------|----------|----------|----|
| 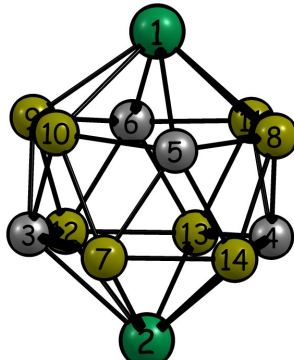 <p>1. -3271.716629 0.0 C<sub>2v</sub></p> <p>WBI: Fe1-Fe2: 0.0728</p> |          | 1        | 2        | 3        | 4        | 5        |    |
|                                                                                                                                                          | 1 Fe     | 0.000000 |          |          |          |          |    |
|                                                                                                                                                          | 2 Fe     | 4.097559 | 0.000000 |          |          |          |    |
|                                                                                                                                                          | 3 C      | 3.157228 | 2.133798 | 0.000000 |          |          |    |
|                                                                                                                                                          | 4 C      | 3.152507 | 2.134287 | 3.238598 | 0.000000 |          |    |
|                                                                                                                                                          | 5 C      | 2.135220 | 3.154566 | 2.642767 | 2.642829 | 0.000000 |    |
|                                                                                                                                                          | 6 C      | 2.133928 | 3.155913 | 2.642281 | 2.642056 | 3.240011 |    |
|                                                                                                                                                          | 7 B      | 3.307808 | 2.118337 | 1.646094 | 2.891863 | 1.695210 |    |
|                                                                                                                                                          | 8 B      | 2.117490 | 3.304435 | 3.512593 | 1.692095 | 1.648909 |    |
|                                                                                                                                                          | 9 B      | 2.119811 | 3.309299 | 1.697516 | 3.513652 | 2.891704 |    |
|                                                                                                                                                          | 10 B     | 2.118935 | 3.308430 | 1.697213 | 3.513441 | 1.647861 |    |
|                                                                                                                                                          | 11 B     | 2.117126 | 3.305642 | 3.512245 | 1.693372 | 2.892262 |    |
|                                                                                                                                                          | 12 B     | 3.309163 | 2.118822 | 1.647360 | 2.890459 | 3.514680 |    |
|                                                                                                                                                          | 13 B     | 3.307106 | 2.119436 | 2.890642 | 1.648127 | 3.515343 |    |
|                                                                                                                                                          | 14 B     | 3.304710 | 2.117008 | 2.888685 | 1.648042 | 1.693513 |    |
|                                                                                                                                                          |          |          | 6        | 7        | 8        | 9        | 10 |
|                                                                                                                                                          | 6 C      | 0.000000 |          |          |          |          |    |
|                                                                                                                                                          | 7 B      | 3.513110 | 0.000000 |          |          |          |    |
|                                                                                                                                                          | 8 B      | 2.890147 | 2.875619 | 0.000000 |          |          |    |
|                                                                                                                                                          | 9 B      | 1.646830 | 2.875801 | 3.403354 | 0.000000 |          |    |
| 10 B                                                                                                                                                     | 2.889453 | 1.783049 | 2.923934 | 1.741259 | 0.000000 |          |    |
| 11 B                                                                                                                                                     | 1.646467 | 3.655218 | 1.742028 | 2.922959 | 3.402485 |          |    |
| 12 B                                                                                                                                                     | 1.696272 | 2.923424 | 3.654546 | 1.784731 | 2.876659 |          |    |
| 13 B                                                                                                                                                     | 1.695996 | 3.404464 | 2.874690 | 2.876715 | 3.656189 |          |    |
| 14 B                                                                                                                                                     | 3.512371 | 1.741758 | 1.779834 | 3.654503 | 2.874620 |          |    |
|                                                                                                                                                          |          | 11       | 12       | 13       | 14       |          |    |
| 11 B                                                                                                                                                     | 0.000000 |          |          |          |          |          |    |
| 12 B                                                                                                                                                     | 2.874331 | 0.000000 |          |          |          |          |    |
| 13 B                                                                                                                                                     | 1.780725 | 1.741563 | 0.000000 |          |          |          |    |
| 14 B                                                                                                                                                     | 2.874651 | 3.402169 | 2.924374 | 0.000000 |          |          |    |

|                                                                                                                                                            |          |          |          |          |          |          |
|------------------------------------------------------------------------------------------------------------------------------------------------------------|----------|----------|----------|----------|----------|----------|
| 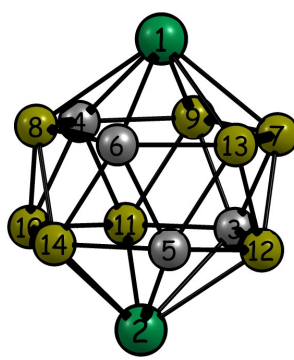 <p>2. -3271.700890 +9.9 <math>C_2</math></p> <p>WBI: Fe1-Fe2: 0.0651</p> | 1        | 2        | 3        | 4        | 5        |          |
|                                                                                                                                                            | 1 Fe     | 0.000000 |          |          |          |          |
|                                                                                                                                                            | 2 Fe     | 4.092835 | 0.000000 |          |          |          |
|                                                                                                                                                            | 3 C      | 3.157231 | 2.129432 | 0.000000 |          |          |
|                                                                                                                                                            | 4 C      | 2.128803 | 3.158181 | 2.636242 | 0.000000 |          |
|                                                                                                                                                            | 5 C      | 3.175242 | 2.082587 | 2.784122 | 3.390993 | 0.000000 |
|                                                                                                                                                            | 6 C      | 2.081992 | 3.177331 | 3.391781 | 2.785443 | 1.629927 |
|                                                                                                                                                            | 7 B      | 2.152029 | 3.322594 | 1.697687 | 2.909866 | 2.785707 |
|                                                                                                                                                            | 8 B      | 2.130552 | 3.262329 | 3.487844 | 1.660403 | 2.737374 |
|                                                                                                                                                            | 9 B      | 2.121630 | 3.307511 | 1.693945 | 1.643553 | 3.520098 |
|                                                                                                                                                            | 10 B     | 3.323057 | 2.152946 | 2.910580 | 1.698538 | 2.889439 |
|                                                                                                                                                            | 11 B     | 3.307561 | 2.123039 | 1.644705 | 1.694209 | 3.299659 |
|                                                                                                                                                            | 12 B     | 3.262160 | 2.131484 | 1.660776 | 3.488712 | 1.645118 |
|                                                                                                                                                            | 13 B     | 2.127848 | 3.316512 | 2.777949 | 3.339688 | 1.724892 |
| 14 B                                                                                                                                                       | 3.315368 | 2.127918 | 3.339005 | 2.779269 | 1.659798 |          |
|                                                                                                                                                            | 6        | 7        | 8        | 9        | 10       |          |
| 6 C                                                                                                                                                        | 0.000000 |          |          |          |          |          |
| 7 B                                                                                                                                                        | 2.888470 | 0.000000 |          |          |          |          |
| 8 B                                                                                                                                                        | 1.646011 | 3.429611 | 0.000000 |          |          |          |
| 9 B                                                                                                                                                        | 3.299235 | 1.743835 | 2.926885 | 0.000000 |          |          |
| 10 B                                                                                                                                                       | 2.788670 | 3.713047 | 1.765502 | 2.888751 | 0.000000 |          |
| 11 B                                                                                                                                                       | 3.522561 | 2.889109 | 2.856760 | 1.784718 | 1.744154 |          |
| 12 B                                                                                                                                                       | 2.738352 | 1.764790 | 3.587493 | 2.856827 | 3.431371 |          |
| 13 B                                                                                                                                                       | 1.661841 | 1.727988 | 2.952614 | 2.975671 | 3.694835 |          |
| 14 B                                                                                                                                                       | 1.724887 | 3.692268 | 1.773634 | 3.659266 | 1.730953 |          |
|                                                                                                                                                            | 11       | 12       | 13       | 14       |          |          |
| 11 B                                                                                                                                                       | 0.000000 |          |          |          |          |          |
| 12 B                                                                                                                                                       | 2.928866 | 0.000000 |          |          |          |          |
| 13 B                                                                                                                                                       | 3.660487 | 1.772772 | 0.000000 |          |          |          |
| 14 B                                                                                                                                                       | 2.977279 | 2.951303 | 2.897578 | 0.000000 |          |          |



|      |          |          |          |          |          |
|------|----------|----------|----------|----------|----------|
|      | 1        | 2        | 3        | 4        | 5        |
| 1 Fe | 0.000000 |          |          |          |          |
| 2 Fe | 4.094624 | 0.000000 |          |          |          |
| 3 C  | 3.161131 | 2.134647 | 0.000000 |          |          |
| 4 C  | 3.150994 | 2.129646 | 2.803406 | 0.000000 |          |
| 5 C  | 3.164265 | 2.086491 | 2.781760 | 2.773666 | 0.000000 |
| 6 C  | 2.064850 | 3.188454 | 3.395872 | 2.646605 | 1.635959 |
| 7 B  | 3.276398 | 2.108284 | 3.303041 | 1.639270 | 1.648288 |
| 8 B  | 2.110620 | 3.329578 | 2.777732 | 3.533708 | 1.734001 |
| 9 B  | 2.153595 | 3.331324 | 2.777523 | 1.704574 | 3.549618 |
| 10 B | 2.101913 | 3.316207 | 3.525369 | 1.696336 | 2.762288 |
| 11 B | 2.154309 | 3.331923 | 1.696459 | 3.554004 | 2.789968 |
| 12 B | 3.252024 | 2.148854 | 1.659745 | 3.311097 | 1.648191 |
| 13 B | 3.264332 | 2.148427 | 1.657467 | 1.667488 | 3.288898 |
| 14 B | 2.158702 | 3.334027 | 1.699931 | 2.784732 | 3.549102 |
|      | 6        | 7        | 8        | 9        | 10       |
| 6 C  | 0.000000 |          |          |          |          |
| 7 B  | 1.717802 | 0.000000 |          |          |          |
| 8 B  | 1.664762 | 2.881706 | 0.000000 |          |          |
| 9 B  | 2.895065 | 2.884291 | 3.457236 | 0.000000 |          |
| 10 B | 1.640417 | 1.791413 | 2.953845 | 1.741275 | 0.000000 |
| 11 B | 2.893548 | 3.661388 | 1.728693 | 3.010620 | 3.442899 |
| 12 B | 2.741688 | 2.931079 | 1.770857 | 3.647829 | 3.616924 |
| 13 B | 3.493333 | 2.923146 | 3.637253 | 1.761126 | 2.857897 |
| 14 B | 3.336597 | 3.655549 | 2.996392 | 1.725432 | 2.983234 |
|      | 11       | 12       | 13       | 14       |          |
| 11 B | 0.000000 |          |          |          |          |
| 12 B | 1.760624 | 0.000000 |          |          |          |
| 13 B | 2.868442 | 2.935715 | 0.000000 |          |          |
| 14 B | 1.746640 | 2.869990 | 1.763469 | 0.000000 |          |

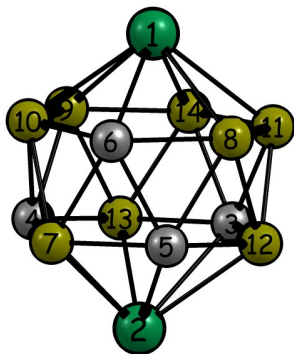

3. -3271.697698 +11.9  $C_1$

WBI: Fe1-Fe2: 0.0633

|  |      |          |          |          |          |          |
|--|------|----------|----------|----------|----------|----------|
|  | 1    | 2        | 3        | 4        | 5        |          |
|  | 1 Fe | 0.000000 |          |          |          |          |
|  | 2 Fe | 4.092857 | 0.000000 |          |          |          |
|  | 3 C  | 2.083915 | 3.175739 | 0.000000 |          |          |
|  | 4 C  | 2.145416 | 3.159545 | 3.227048 | 0.000000 |          |
|  | 5 C  | 3.150586 | 2.118253 | 2.650152 | 2.642816 | 0.000000 |
|  | 6 C  | 3.174940 | 2.088183 | 1.628770 | 3.397524 | 2.782713 |
|  | 7 B  | 3.308571 | 2.126097 | 3.520706 | 1.688548 | 1.654131 |
|  | 8 B  | 2.168532 | 3.291437 | 2.893677 | 1.665536 | 3.516994 |
|  | 9 B  | 3.332156 | 2.158207 | 3.555206 | 1.693320 | 2.909453 |
|  | 10 B | 3.289521 | 2.087952 | 1.719970 | 3.502088 | 1.644683 |
|  | 11 B | 3.286974 | 2.163761 | 2.756459 | 2.763906 | 3.337232 |
|  | 12 B | 2.106892 | 3.299312 | 1.638649 | 2.891253 | 1.696842 |
|  | 13 B | 2.114389 | 3.303311 | 2.873527 | 1.642275 | 1.702092 |
|  | 14 B | 2.123763 | 3.320626 | 1.660600 | 2.900511 | 3.529225 |
|  |      | 6        | 7        | 8        | 9        | 10       |
|  | 6 C  | 0.000000 |          |          |          |          |
|  | 7 B  | 3.307695 | 0.000000 |          |          |          |
|  | 8 B  | 2.773850 | 2.868804 | 0.000000 |          |          |
|  | 9 B  | 2.892879 | 1.739995 | 1.767995 | 0.000000 |          |
|  | 10 B | 1.651164 | 2.921110 | 3.637777 | 3.420034 | 0.000000 |
|  | 11 B | 1.652722 | 2.985471 | 1.760098 | 1.742116 | 2.944119 |
|  | 12 B | 2.758227 | 2.879144 | 3.427206 | 3.683451 | 1.791503 |
|  | 13 B | 3.523114 | 1.781843 | 2.942243 | 2.882238 | 2.874815 |
|  | 14 B | 1.723538 | 3.668956 | 1.743967 | 2.913671 | 2.877581 |
|  |      | 11       | 12       | 13       | 14       |          |
|  | 11 B | 0.000000 |          |          |          |          |
|  | 12 B | 3.638875 | 0.000000 |          |          |          |
|  | 13 B | 3.641691 | 1.740808 | 0.000000 |          |          |
|  | 14 B | 1.778319 | 2.946013 | 3.414631 | 0.000000 |          |

  

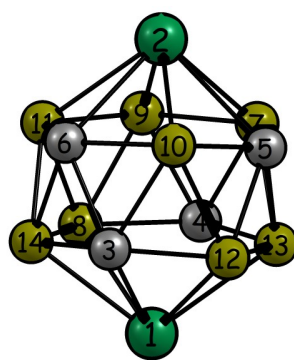

4. -3271.696742 +12.5  $C_1$

WBI: Fe1-Fe2: 0.0675

|                                                                                                                                                             |          |          |          |          |          |          |
|-------------------------------------------------------------------------------------------------------------------------------------------------------------|----------|----------|----------|----------|----------|----------|
| 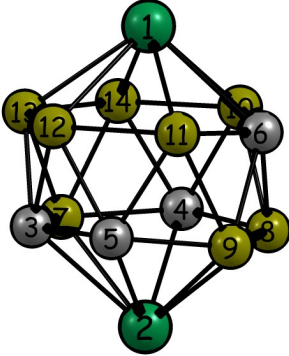 <p>5. -3271.696270 +12.8 <math>C_1</math></p> <p>WBI: Fe1-Fe2: 0.0696</p> | 1        | 2        | 3        | 4        | 5        |          |
|                                                                                                                                                             | 1 Fe     | 0.000000 |          |          |          |          |
|                                                                                                                                                             | 2 Fe     | 4.109922 | 0.000000 |          |          |          |
|                                                                                                                                                             | 3 C      | 3.132682 | 2.126442 | 0.000000 |          |          |
|                                                                                                                                                             | 4 C      | 3.155976 | 2.146012 | 2.793052 | 0.000000 |          |
|                                                                                                                                                             | 5 C      | 3.125752 | 2.140995 | 1.575858 | 3.222276 | 0.000000 |
|                                                                                                                                                             | 6 C      | 2.111213 | 3.175622 | 3.359103 | 2.640118 | 2.627739 |
|                                                                                                                                                             | 7 B      | 3.259989 | 2.140635 | 1.655818 | 1.661212 | 2.842931 |
|                                                                                                                                                             | 8 B      | 3.301531 | 2.127504 | 3.293055 | 1.642220 | 2.876559 |
|                                                                                                                                                             | 9 B      | 3.295867 | 2.121309 | 2.826890 | 2.881868 | 1.640633 |
|                                                                                                                                                             | 10 B     | 2.118174 | 3.322960 | 3.500391 | 1.690997 | 3.495093 |
|                                                                                                                                                             | 11 B     | 2.101339 | 3.328803 | 2.742785 | 3.516582 | 1.689760 |
|                                                                                                                                                             | 12 B     | 2.122837 | 3.372316 | 1.706244 | 3.569862 | 1.707262 |
|                                                                                                                                                             | 13 B     | 2.144546 | 3.342070 | 1.699153 | 2.783100 | 2.762389 |
| 14 B                                                                                                                                                        | 2.153473 | 3.340390 | 2.768820 | 1.697679 | 3.526635 |          |
|                                                                                                                                                             | 6        | 7        | 8        | 9        | 10       |          |
| 6 C                                                                                                                                                         | 0.000000 |          |          |          |          |          |
| 7 B                                                                                                                                                         | 3.481017 | 0.000000 |          |          |          |          |
| 8 B                                                                                                                                                         | 1.704328 | 2.919255 | 0.000000 |          |          |          |
| 9 B                                                                                                                                                         | 1.705133 | 3.376672 | 1.736562 | 0.000000 |          |          |
| 10 B                                                                                                                                                        | 1.647049 | 2.852399 | 1.785557 | 2.875918 | 0.000000 |          |
| 11 B                                                                                                                                                        | 1.645326 | 3.615928 | 2.880514 | 1.792229 | 2.927654 |          |
| 12 B                                                                                                                                                        | 2.906883 | 2.880736 | 3.698012 | 2.901651 | 3.442243 |          |
| 13 B                                                                                                                                                        | 3.346493 | 1.768371 | 3.667086 | 3.664256 | 2.982925 |          |
| 14 B                                                                                                                                                        | 2.906456 | 1.764922 | 2.886963 | 3.677617 | 1.742539 |          |
|                                                                                                                                                             | 11       | 12       | 13       | 14       |          |          |
| 11 B                                                                                                                                                        | 0.000000 |          |          |          |          |          |
| 12 B                                                                                                                                                        | 1.739371 | 0.000000 |          |          |          |          |
| 13 B                                                                                                                                                        | 2.986319 | 1.739474 | 0.000000 |          |          |          |
| 14 B                                                                                                                                                        | 3.438690 | 3.007966 | 1.726241 | 0.000000 |          |          |

|                                                                                                                                                             |          |          |          |          |          |          |
|-------------------------------------------------------------------------------------------------------------------------------------------------------------|----------|----------|----------|----------|----------|----------|
| 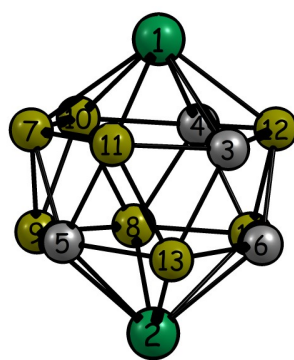 <p>6. -3271.694558 +13.8 <math>C_1</math></p> <p>WBI: Fe1-Fe2: 0.0660</p> | 1        | 2        | 3        | 4        | 5        |          |
|                                                                                                                                                             | 1 Fe     | 0.000000 |          |          |          |          |
|                                                                                                                                                             | 2 Fe     | 4.091332 | 0.000000 |          |          |          |
|                                                                                                                                                             | 3 C      | 2.071614 | 3.167804 | 0.000000 |          |          |
|                                                                                                                                                             | 4 C      | 2.135679 | 3.157578 | 2.785688 | 0.000000 |          |
|                                                                                                                                                             | 5 C      | 3.155964 | 2.133880 | 2.644096 | 3.398896 | 0.000000 |
|                                                                                                                                                             | 6 C      | 3.168071 | 2.071608 | 1.633172 | 2.646287 | 2.783382 |
|                                                                                                                                                             | 7 B      | 2.157645 | 3.332093 | 2.890773 | 2.912878 | 1.698848 |
|                                                                                                                                                             | 8 B      | 3.332119 | 2.158481 | 3.552221 | 1.699322 | 2.911021 |
|                                                                                                                                                             | 9 B      | 3.293218 | 2.174970 | 3.516218 | 2.766636 | 1.669158 |
|                                                                                                                                                             | 10 B     | 2.173987 | 3.295269 | 3.322304 | 1.670035 | 2.766706 |
|                                                                                                                                                             | 11 B     | 2.119260 | 3.303852 | 1.643969 | 3.331857 | 1.687860 |
|                                                                                                                                                             | 12 B     | 2.086000 | 3.289046 | 1.658672 | 1.638484 | 3.502865 |
|                                                                                                                                                             | 13 B     | 3.290059 | 2.085314 | 1.723915 | 3.505691 | 1.637799 |
| 14 B                                                                                                                                                        | 3.303639 | 2.118999 | 2.767645 | 1.687602 | 3.328883 |          |
|                                                                                                                                                             | 6        | 7        | 8        | 9        | 10       |          |
| 6 C                                                                                                                                                         | 0.000000 |          |          |          |          |          |
| 7 B                                                                                                                                                         | 3.551800 | 0.000000 |          |          |          |          |
| 8 B                                                                                                                                                         | 2.891964 | 2.913681 | 0.000000 |          |          |          |
| 9 B                                                                                                                                                         | 3.322051 | 1.767982 | 1.740425 | 0.000000 |          |          |
| 10 B                                                                                                                                                        | 3.517620 | 1.741276 | 1.769058 | 1.758171 | 0.000000 |          |
| 11 B                                                                                                                                                        | 2.767109 | 1.738970 | 3.684693 | 2.869629 | 2.988146 |          |
| 12 B                                                                                                                                                        | 1.723504 | 3.418729 | 2.881977 | 3.630853 | 2.934468 |          |
| 13 B                                                                                                                                                        | 1.658091 | 2.882422 | 3.419476 | 2.934808 | 3.632914 |          |
| 14 B                                                                                                                                                        | 1.645272 | 3.683706 | 1.738431 | 2.986492 | 2.869553 |          |
|                                                                                                                                                             | 11       | 12       | 13       | 14       |          |          |
| 11 B                                                                                                                                                        | 0.000000 |          |          |          |          |          |
| 12 B                                                                                                                                                        | 2.936828 | 0.000000 |          |          |          |          |
| 13 B                                                                                                                                                        | 1.792093 | 2.871803 | 0.000000 |          |          |          |
| 14 B                                                                                                                                                        | 3.650151 | 1.791370 | 2.936948 | 0.000000 |          |          |

|  |      |          |          |          |          |          |
|--|------|----------|----------|----------|----------|----------|
|  | 1    | 2        | 3        | 4        | 5        |          |
|  | 1 Fe | 0.000000 |          |          |          |          |
|  | 2 Fe | 3.771601 | 0.000000 |          |          |          |
|  | 3 C  | 2.098795 | 2.158616 | 0.000000 |          |          |
|  | 4 C  | 3.150085 | 2.001414 | 2.742676 | 0.000000 |          |
|  | 5 C  | 2.058525 | 3.866229 | 3.179886 | 2.832227 | 0.000000 |
|  | 6 C  | 3.119728 | 3.202928 | 2.630124 | 3.705722 | 2.665931 |
|  | 7 B  | 2.069032 | 3.337604 | 1.654807 | 3.784982 | 2.851742 |
|  | 8 B  | 2.195752 | 2.142800 | 1.626523 | 1.568030 | 2.981216 |
|  | 9 B  | 3.810504 | 2.136798 | 2.845258 | 2.834741 | 3.056665 |
|  | 10 B | 2.090284 | 4.057551 | 2.889940 | 3.771666 | 1.572704 |
|  | 11 B | 3.199692 | 3.370678 | 3.330041 | 3.001115 | 1.670885 |
|  | 12 B | 3.708472 | 2.165078 | 3.222739 | 1.559527 | 2.649863 |
|  | 13 B | 3.276030 | 2.056107 | 1.678221 | 3.323705 | 3.544763 |
|  | 14 B | 2.249796 | 3.250458 | 2.996750 | 1.612924 | 1.550069 |
|  | 6 C  | 0.000000 |          |          |          |          |
|  | 7 B  | 1.689578 | 0.000000 |          |          |          |
|  | 8 B  | 3.601826 | 2.978215 | 0.000000 |          |          |
|  | 9 B  | 1.679265 | 2.871857 | 3.304565 | 0.000000 |          |
|  | 10 B | 1.702901 | 1.774733 | 3.492617 | 2.931209 | 0.000000 |
|  | 11 B | 1.730626 | 2.879063 | 3.511655 | 1.758305 | 1.861361 |
|  | 12 B | 2.958528 | 3.732825 | 2.756679 | 1.734991 | 3.406027 |
|  | 13 B | 1.671739 | 1.774343 | 2.921096 | 1.772695 | 2.905009 |
|  | 14 B | 3.523197 | 3.477667 | 2.022781 | 3.288470 | 2.873784 |
|  | 11   | 12       | 13       | 14       |          |          |
|  | 11 B | 0.000000 |          |          |          |          |
|  | 12 B | 1.969206 | 0.000000 |          |          |          |
|  | 13 B | 2.862940 | 3.007908 | 0.000000 |          |          |
|  | 14 B | 2.538335 | 2.199551 | 3.753688 | 0.000000 |          |

  

7. -3271.686432 +18.9  $C_1$

WBI: Fe1-Fe2: 0.1307

|                                                                                                                                                             |          |          |          |          |          |          |
|-------------------------------------------------------------------------------------------------------------------------------------------------------------|----------|----------|----------|----------|----------|----------|
| 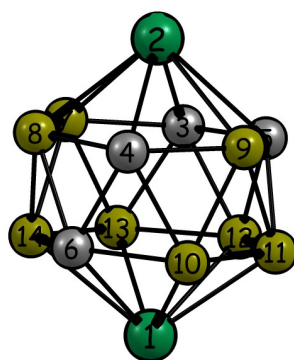 <p>8. -3271.677969 +24.3 <math>C_1</math></p> <p>WBI: Fe1-Fe2: 0.0654</p> | 1        | 2        | 3        | 4        | 5        |          |
|                                                                                                                                                             | 1 Fe     | 0.000000 |          |          |          |          |
|                                                                                                                                                             | 2 Fe     | 4.104440 | 0.000000 |          |          |          |
|                                                                                                                                                             | 3 C      | 3.135623 | 2.136387 | 0.000000 |          |          |
|                                                                                                                                                             | 4 C      | 3.174332 | 2.099560 | 3.203032 | 0.000000 |          |
|                                                                                                                                                             | 5 C      | 3.133772 | 2.121360 | 1.571394 | 2.772242 | 0.000000 |
|                                                                                                                                                             | 6 C      | 2.086514 | 3.191869 | 3.377902 | 1.627972 | 3.371574 |
|                                                                                                                                                             | 7 B      | 3.280619 | 2.160931 | 1.659478 | 2.882303 | 2.847380 |
|                                                                                                                                                             | 8 B      | 3.312754 | 2.133461 | 2.888164 | 1.652117 | 3.307308 |
|                                                                                                                                                             | 9 B      | 3.251532 | 2.137486 | 2.841113 | 1.643607 | 1.656314 |
|                                                                                                                                                             | 10 B     | 2.112229 | 3.334802 | 3.513770 | 1.731028 | 2.767675 |
|                                                                                                                                                             | 11 B     | 2.136515 | 3.337649 | 2.757285 | 2.793103 | 1.698148 |
|                                                                                                                                                             | 12 B     | 2.127622 | 3.371242 | 1.707520 | 3.571575 | 1.713763 |
|                                                                                                                                                             | 13 B     | 2.145188 | 3.338399 | 1.689055 | 3.550561 | 2.751788 |
| 14 B                                                                                                                                                        | 2.146620 | 3.299375 | 2.753626 | 2.751676 | 3.492017 |          |
|                                                                                                                                                             | 6        | 7        | 8        | 9        | 10       |          |
| 6 C                                                                                                                                                         | 0.000000 |          |          |          |          |          |
| 7 B                                                                                                                                                         | 2.769954 | 0.000000 |          |          |          |          |
| 8 B                                                                                                                                                         | 1.719311 | 1.743065 | 0.000000 |          |          |          |
| 9 B                                                                                                                                                         | 2.733407 | 3.399063 | 2.936149 | 0.000000 |          |          |
| 10 B                                                                                                                                                        | 1.659311 | 3.661190 | 2.890327 | 1.777033 | 0.000000 |          |
| 11 B                                                                                                                                                        | 2.890358 | 3.666552 | 3.685180 | 1.771584 | 1.728741 |          |
| 12 B                                                                                                                                                        | 3.344030 | 2.894864 | 3.711102 | 2.886635 | 2.995797 |          |
| 13 B                                                                                                                                                        | 2.891359 | 1.771133 | 2.914916 | 3.639772 | 3.448929 |          |
| 14 B                                                                                                                                                        | 1.647484 | 1.766911 | 1.782098 | 3.604260 | 2.959313 |          |
|                                                                                                                                                             | 11       | 12       | 13       | 14       |          |          |
| 11 B                                                                                                                                                        | 0.000000 |          |          |          |          |          |
| 12 B                                                                                                                                                        | 1.739251 | 0.000000 |          |          |          |          |
| 13 B                                                                                                                                                        | 3.003255 | 1.735438 | 0.000000 |          |          |          |
| 14 B                                                                                                                                                        | 3.449661 | 3.001957 | 1.741721 | 0.000000 |          |          |

|  |      |          |          |          |          |          |
|--|------|----------|----------|----------|----------|----------|
|  | 1    | 2        | 3        | 4        | 5        |          |
|  | 1 Fe | 0.000000 |          |          |          |          |
|  | 2 Fe | 3.747997 | 0.000000 |          |          |          |
|  | 3 C  | 3.092099 | 3.265105 | 0.000000 |          |          |
|  | 4 C  | 2.143853 | 2.056083 | 2.640880 | 0.000000 |          |
|  | 5 C  | 3.131068 | 1.976876 | 3.312217 | 2.700743 | 0.000000 |
|  | 6 C  | 2.077790 | 3.980914 | 2.635710 | 3.257776 | 2.654996 |
|  | 7 B  | 3.247750 | 3.239286 | 2.870381 | 3.502312 | 1.635174 |
|  | 8 B  | 3.609945 | 2.106553 | 1.915992 | 2.774748 | 1.929049 |
|  | 9 B  | 2.092930 | 3.285532 | 3.512995 | 2.916977 | 1.663116 |
|  | 10 B | 3.245351 | 3.738792 | 1.628295 | 3.489257 | 2.886668 |
|  | 11 B | 2.086591 | 4.134711 | 1.676788 | 2.921186 | 3.559975 |
|  | 12 B | 2.093512 | 3.277799 | 1.680814 | 1.644796 | 3.565625 |
|  | 13 B | 2.177857 | 2.047309 | 3.498891 | 1.642641 | 1.658518 |
|  | 14 B | 3.285078 | 1.980257 | 1.660431 | 1.694401 | 2.961920 |
|  | 6 C  | 0.000000 |          |          |          |          |
|  | 7 B  | 1.705670 | 0.000000 |          |          |          |
|  | 8 B  | 2.808539 | 1.867718 | 0.000000 |          |          |
|  | 9 B  | 1.648780 | 1.781957 | 2.936798 | 0.000000 |          |
|  | 10 B | 1.710967 | 1.697831 | 1.863134 | 2.856162 | 0.000000 |
|  | 11 B | 1.643804 | 2.862399 | 2.961841 | 2.934355 | 1.792371 |
|  | 12 B | 2.891958 | 3.632274 | 2.941428 | 3.408431 | 2.863665 |
|  | 13 B | 2.932531 | 2.857651 | 2.874493 | 1.795611 | 3.620088 |
|  | 14 B | 3.521091 | 3.369803 | 1.872892 | 3.663213 | 2.881704 |
|  | 11 B | 0.000000 |          |          |          |          |
|  | 12 B | 1.763479 | 0.000000 |          |          |          |
|  | 13 B | 3.448095 | 2.927378 | 0.000000 |          |          |
|  | 14 B | 2.895621 | 1.791686 | 2.833509 | 0.000000 |          |

  

|  |      |          |          |          |          |          |
|--|------|----------|----------|----------|----------|----------|
|  | 6    | 7        | 8        | 9        | 10       |          |
|  | 6 C  | 0.000000 |          |          |          |          |
|  | 7 B  | 1.705670 | 0.000000 |          |          |          |
|  | 8 B  | 2.808539 | 1.867718 | 0.000000 |          |          |
|  | 9 B  | 1.648780 | 1.781957 | 2.936798 | 0.000000 |          |
|  | 10 B | 1.710967 | 1.697831 | 1.863134 | 2.856162 | 0.000000 |
|  | 11 B | 1.643804 | 2.862399 | 2.961841 | 2.934355 | 1.792371 |
|  | 12 B | 2.891958 | 3.632274 | 2.941428 | 3.408431 | 2.863665 |
|  | 13 B | 2.932531 | 2.857651 | 2.874493 | 1.795611 | 3.620088 |
|  | 14 B | 3.521091 | 3.369803 | 1.872892 | 3.663213 | 2.881704 |
|  | 11   | 12       | 13       | 14       |          |          |
|  | 11 B | 0.000000 |          |          |          |          |
|  | 12 B | 1.763479 | 0.000000 |          |          |          |
|  | 13 B | 3.448095 | 2.927378 | 0.000000 |          |          |
|  | 14 B | 2.895621 | 1.791686 | 2.833509 | 0.000000 |          |

  

|               |              |       |       |
|---------------|--------------|-------|-------|
| 9.            | -3271.674110 | +26.7 | $C_1$ |
| WBI: Fe1-Fe2: | 0.1329       |       |       |

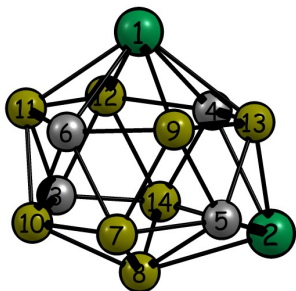

|  |      |          |          |          |          |          |
|--|------|----------|----------|----------|----------|----------|
|  |      | 1        | 2        | 3        | 4        | 5        |
|  | 1 Fe | 0.000000 |          |          |          |          |
|  | 2 Fe | 4.132804 | 0.000000 |          |          |          |
|  | 3 C  | 3.131602 | 2.144710 | 0.000000 |          |          |
|  | 4 C  | 3.131335 | 2.144591 | 1.566501 | 0.000000 |          |
|  | 5 C  | 3.134741 | 2.144696 | 3.187383 | 2.778030 | 0.000000 |
|  | 6 C  | 3.133054 | 2.145372 | 2.774101 | 3.186544 | 1.564125 |
|  | 7 B  | 3.253135 | 2.145702 | 2.824896 | 1.654220 | 1.652820 |
|  | 8 B  | 3.254364 | 2.148547 | 1.654078 | 2.826297 | 2.822749 |
|  | 9 B  | 2.135449 | 3.363827 | 3.518897 | 2.771605 | 1.702147 |
|  | 10 B | 2.120661 | 3.397405 | 3.546123 | 3.547001 | 1.713417 |
|  | 11 B | 2.133028 | 3.367515 | 2.771266 | 3.519266 | 2.756604 |
|  | 12 B | 2.134770 | 3.364223 | 1.699165 | 2.755128 | 3.519208 |
|  | 13 B | 2.119664 | 3.392767 | 1.709628 | 1.709358 | 3.546565 |
|  | 14 B | 2.134541 | 3.361243 | 2.754587 | 1.698014 | 2.771966 |
|  |      | 6        | 7        | 8        | 9        | 10       |
|  | 6 C  | 0.000000 |          |          |          |          |
|  | 7 B  | 2.822252 | 0.000000 |          |          |          |
|  | 8 B  | 1.649720 | 3.350004 | 0.000000 |          |          |
|  | 9 B  | 2.754991 | 1.773595 | 3.634300 | 0.000000 |          |
|  | 10 B | 1.713266 | 2.880787 | 2.880689 | 1.737923 | 0.000000 |
|  | 11 B | 1.702832 | 3.634144 | 1.775996 | 3.002288 | 1.737538 |
|  | 12 B | 2.770166 | 3.634266 | 1.775523 | 3.463631 | 3.002359 |
|  | 13 B | 3.543654 | 2.880882 | 2.881233 | 3.002879 | 3.473987 |
|  | 14 B | 3.516615 | 1.773147 | 3.634288 | 1.725153 | 3.001961 |
|  |      | 11       | 12       | 13       | 14       |          |
|  | 11 B | 0.000000 |          |          |          |          |
|  | 12 B | 1.724336 | 0.000000 |          |          |          |
|  | 13 B | 3.000566 | 1.737206 | 0.000000 |          |          |
|  | 14 B | 3.461770 | 3.002894 | 1.738494 | 0.000000 |          |

  

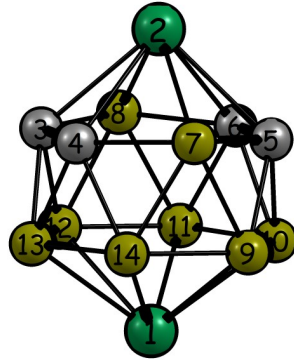

10. -3271.673943 +26.8  
 $C_{2v}$

WBI: Fe1-Fe2: 0.0636



|                                                                                                                                                              |          |          |          |          |          |          |
|--------------------------------------------------------------------------------------------------------------------------------------------------------------|----------|----------|----------|----------|----------|----------|
| 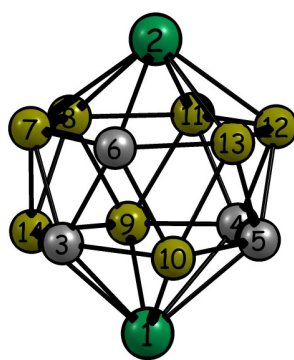 <p>11. -3271.672564 +27.7 <math>C_1</math></p> <p>WBI: Fe1-Fe2: 0.0666</p> | 1        | 2        | 3        | 4        | 5        |          |
|                                                                                                                                                              | 1 Fe     | 0.000000 |          |          |          |          |
|                                                                                                                                                              | 2 Fe     | 4.105766 | 0.000000 |          |          |          |
|                                                                                                                                                              | 3 C      | 2.101470 | 3.173033 | 0.000000 |          |          |
|                                                                                                                                                              | 4 C      | 2.140290 | 3.136969 | 3.206596 | 0.000000 |          |
|                                                                                                                                                              | 5 C      | 2.122035 | 3.123327 | 2.771328 | 1.581877 | 0.000000 |
|                                                                                                                                                              | 6 C      | 3.195159 | 2.066694 | 1.635744 | 3.372737 | 2.637346 |
|                                                                                                                                                              | 7 B      | 3.337880 | 2.126489 | 1.729075 | 3.523142 | 3.513377 |
|                                                                                                                                                              | 8 B      | 3.320290 | 2.190977 | 2.781494 | 2.763966 | 3.519488 |
|                                                                                                                                                              | 9 B      | 2.161909 | 3.295909 | 2.886234 | 1.652939 | 2.849364 |
|                                                                                                                                                              | 10 B     | 2.095830 | 3.274982 | 1.645615 | 2.831937 | 1.641195 |
|                                                                                                                                                              | 11 B     | 3.343936 | 2.153371 | 3.549865 | 1.694542 | 2.763165 |
|                                                                                                                                                              | 12 B     | 3.364847 | 2.125675 | 3.571214 | 1.697637 | 1.711943 |
|                                                                                                                                                              | 13 B     | 3.319636 | 2.087567 | 2.765829 | 2.745045 | 1.692718 |
| 14 B                                                                                                                                                         | 2.168112 | 3.291414 | 1.643376 | 2.900453 | 3.315261 |          |
|                                                                                                                                                              | 6        | 7        | 8        | 9        | 10       |          |
| 6 C                                                                                                                                                          | 0.000000 |          |          |          |          |          |
| 7 B                                                                                                                                                          | 1.663883 | 0.000000 |          |          |          |          |
| 8 B                                                                                                                                                          | 2.899490 | 1.735616 | 0.000000 |          |          |          |
| 9 B                                                                                                                                                          | 3.524940 | 2.900002 | 1.771575 | 0.000000 |          |          |
| 10 B                                                                                                                                                         | 1.721306 | 2.875931 | 3.647090 | 3.386229 | 0.000000 |          |
| 11 B                                                                                                                                                         | 3.331978 | 2.987098 | 1.735089 | 1.771227 | 3.650348 |          |
| 12 B                                                                                                                                                         | 2.896915 | 3.460095 | 3.018895 | 2.885412 | 2.901054 |          |
| 13 B                                                                                                                                                         | 1.639390 | 2.951150 | 3.445983 | 3.639098 | 1.799374 |          |
| 14 B                                                                                                                                                         | 2.751809 | 1.776005 | 1.767285 | 1.763877 | 2.928578 |          |
|                                                                                                                                                              | 11       | 12       | 13       | 14       |          |          |
| 11 B                                                                                                                                                         | 0.000000 |          |          |          |          |          |
| 12 B                                                                                                                                                         | 1.737492 | 0.000000 |          |          |          |          |
| 13 B                                                                                                                                                         | 2.981797 | 1.737945 | 0.000000 |          |          |          |
| 14 B                                                                                                                                                         | 2.901502 | 3.698995 | 3.637762 | 0.000000 |          |          |

|  |      |          |          |          |          |          |
|--|------|----------|----------|----------|----------|----------|
|  | 1    | 2        | 3        | 4        | 5        |          |
|  | 1 Fe | 0.000000 |          |          |          |          |
|  | 2 Fe | 4.100369 | 0.000000 |          |          |          |
|  | 3 C  | 3.171198 | 2.147326 | 0.000000 |          |          |
|  | 4 C  | 3.171565 | 2.068564 | 2.786185 | 0.000000 |          |
|  | 5 C  | 2.048237 | 3.158874 | 3.372005 | 1.629722 | 0.000000 |
|  | 6 C  | 2.109430 | 3.135969 | 3.379023 | 2.615742 | 1.559273 |
|  | 7 B  | 3.266146 | 2.131850 | 1.655762 | 1.650774 | 2.728134 |
|  | 8 B  | 3.353250 | 2.084080 | 3.342421 | 1.653521 | 1.765900 |
|  | 9 B  | 3.329663 | 2.147382 | 2.914103 | 2.878334 | 2.769230 |
|  | 10 B | 3.300882 | 2.166662 | 1.660027 | 3.309373 | 3.495577 |
|  | 11 B | 2.167962 | 3.288391 | 2.761387 | 3.505661 | 2.835740 |
|  | 12 B | 2.163785 | 3.334576 | 1.693817 | 3.542326 | 3.301054 |
|  | 13 B | 2.167096 | 3.330720 | 1.690838 | 2.794870 | 2.875019 |
|  | 14 B | 2.116647 | 3.315200 | 2.773767 | 1.734225 | 1.655770 |
|  | 6 C  | 0.000000 |          |          |          |          |
|  | 7 B  | 3.462566 | 0.000000 |          |          |          |
|  | 8 B  | 1.722183 | 2.949299 | 0.000000 |          |          |
|  | 9 B  | 1.696674 | 3.425333 | 1.726376 | 0.000000 |          |
|  | 10 B | 2.757611 | 2.939972 | 2.985382 | 1.746688 | 0.000000 |
|  | 11 B | 1.665287 | 3.616909 | 2.893932 | 1.771051 | 1.762087 |
|  | 12 B | 2.893256 | 2.863396 | 3.707962 | 2.916988 | 1.772026 |
|  | 13 B | 3.341668 | 1.766439 | 3.715882 | 3.713455 | 2.880783 |
|  | 14 B | 2.860694 | 1.775363 | 2.925056 | 3.691017 | 3.656524 |
|  | 11 B | 0.000000 |          |          |          |          |
|  | 12 B | 1.739020 | 0.000000 |          |          |          |
|  | 13 B | 3.009254 | 1.741365 | 0.000000 |          |          |
|  | 14 B | 3.435177 | 2.987345 | 1.730197 | 0.000000 |          |

  

|  |      |          |          |          |          |          |
|--|------|----------|----------|----------|----------|----------|
|  | 6    | 7        | 8        | 9        | 10       |          |
|  | 6 C  | 0.000000 |          |          |          |          |
|  | 7 B  | 3.462566 | 0.000000 |          |          |          |
|  | 8 B  | 1.722183 | 2.949299 | 0.000000 |          |          |
|  | 9 B  | 1.696674 | 3.425333 | 1.726376 | 0.000000 |          |
|  | 10 B | 2.757611 | 2.939972 | 2.985382 | 1.746688 | 0.000000 |
|  | 11 B | 1.665287 | 3.616909 | 2.893932 | 1.771051 | 1.762087 |
|  | 12 B | 2.893256 | 2.863396 | 3.707962 | 2.916988 | 1.772026 |
|  | 13 B | 3.341668 | 1.766439 | 3.715882 | 3.713455 | 2.880783 |
|  | 14 B | 2.860694 | 1.775363 | 2.925056 | 3.691017 | 3.656524 |
|  | 11   | 12       | 13       | 14       |          |          |
|  | 11 B | 0.000000 |          |          |          |          |
|  | 12 B | 1.739020 | 0.000000 |          |          |          |
|  | 13 B | 3.009254 | 1.741365 | 0.000000 |          |          |
|  | 14 B | 3.435177 | 2.987345 | 1.730197 | 0.000000 |          |

  

|     |                      |       |       |
|-----|----------------------|-------|-------|
| 12. | -3271.672094         | +27.9 | $C_1$ |
|     | WBI: Fe1-Fe2: 0.0679 |       |       |

  
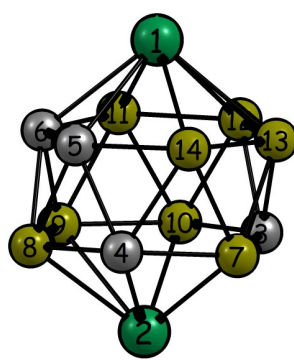

|      |          |          |          |          |          |
|------|----------|----------|----------|----------|----------|
|      | 1        | 2        | 3        | 4        | 5        |
| 1 Fe | 0.000000 |          |          |          |          |
| 2 Fe | 4.106724 | 0.000000 |          |          |          |
| 3 C  | 3.166828 | 2.152664 | 0.000000 |          |          |
| 4 C  | 3.144418 | 2.077819 | 3.195864 | 0.000000 |          |
| 5 C  | 3.121265 | 2.113904 | 2.790412 | 1.557200 | 0.000000 |
| 6 C  | 2.066368 | 3.195074 | 3.397971 | 1.624939 | 2.615514 |
| 7 B  | 3.289001 | 2.176126 | 1.660193 | 2.867869 | 3.310711 |
| 8 B  | 3.311079 | 2.128470 | 2.895507 | 1.644553 | 2.842836 |
| 9 B  | 3.260954 | 2.141544 | 1.653632 | 2.822826 | 1.663865 |
| 10 B | 2.065229 | 3.372043 | 3.556679 | 1.763746 | 1.724215 |
| 11 B | 2.141490 | 3.336965 | 2.781726 | 2.774757 | 1.700821 |
| 12 B | 2.159873 | 3.342504 | 1.695416 | 3.523156 | 2.772009 |
| 13 B | 2.165418 | 3.344209 | 1.691991 | 3.525949 | 3.525732 |
| 14 B | 2.149300 | 3.304861 | 2.763249 | 2.738562 | 3.480619 |
|      | 6        | 7        | 8        | 9        | 10       |
| 6 C  | 0.000000 |          |          |          |          |
| 7 B  | 2.776840 | 0.000000 |          |          |          |
| 8 B  | 1.731075 | 1.744385 | 0.000000 |          |          |
| 9 B  | 3.486630 | 2.939816 | 3.396844 | 0.000000 |          |
| 10 B | 1.657044 | 3.684727 | 2.918132 | 2.885498 | 0.000000 |
| 11 B | 2.892165 | 3.673752 | 3.689022 | 1.768785 | 1.733671 |
| 12 B | 3.335298 | 2.879168 | 3.692318 | 1.765714 | 2.986231 |
| 13 B | 2.891740 | 1.766404 | 2.914117 | 2.861340 | 3.449147 |
| 14 B | 1.652078 | 1.765179 | 1.787706 | 3.614976 | 2.961020 |
|      | 11       | 12       | 13       | 14       |          |
| 11 B | 0.000000 |          |          |          |          |
| 12 B | 1.730191 | 0.000000 |          |          |          |
| 13 B | 3.009012 | 1.741508 | 0.000000 |          |          |
| 14 B | 3.456588 | 3.001017 | 1.740121 | 0.000000 |          |

  

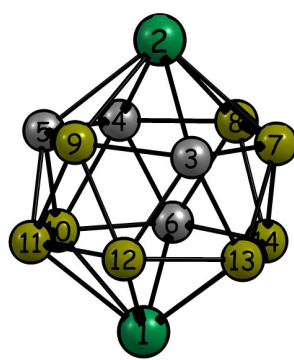

13. -3271.671709 +28.2  $C_1$

WBI: Fe1-Fe2: 0.0673

|                                                                                                                                                              |          |          |          |          |          |          |  |  |  |  |  |
|--------------------------------------------------------------------------------------------------------------------------------------------------------------|----------|----------|----------|----------|----------|----------|--|--|--|--|--|
| 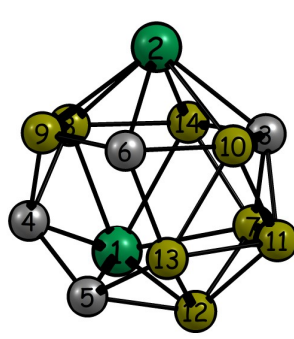 <p>14. -3271.669444 +29.6 <math>C_1</math></p> <p>WBI: Fe1-Fe2: 0.1555</p> | 1        | 2        | 3        | 4        | 5        |          |  |  |  |  |  |
|                                                                                                                                                              | 1 Fe     | 0.000000 |          |          |          |          |  |  |  |  |  |
|                                                                                                                                                              | 2 Fe     | 3.717006 | 0.000000 |          |          |          |  |  |  |  |  |
|                                                                                                                                                              | 3 C      | 3.203963 | 2.080501 | 0.000000 |          |          |  |  |  |  |  |
|                                                                                                                                                              | 4 C      | 1.976176 | 3.192186 | 3.643919 | 0.000000 |          |  |  |  |  |  |
|                                                                                                                                                              | 5 C      | 2.032356 | 3.737143 | 3.482349 | 1.442917 | 0.000000 |  |  |  |  |  |
|                                                                                                                                                              | 6 C      | 3.850336 | 2.069811 | 2.782549 | 2.724999 | 2.745599 |  |  |  |  |  |
|                                                                                                                                                              | 7 B      | 2.112004 | 3.314849 | 1.679178 | 3.342478 | 2.883791 |  |  |  |  |  |
|                                                                                                                                                              | 8 B      | 2.126864 | 2.151898 | 2.950427 | 1.605487 | 2.679781 |  |  |  |  |  |
|                                                                                                                                                              | 9 B      | 3.322223 | 2.100583 | 3.363327 | 1.748750 | 2.559161 |  |  |  |  |  |
|                                                                                                                                                              | 10 B     | 3.982794 | 2.098416 | 1.682796 | 3.629727 | 3.326308 |  |  |  |  |  |
|                                                                                                                                                              | 11 B     | 3.300243 | 3.286907 | 1.685780 | 3.702450 | 2.890548 |  |  |  |  |  |
|                                                                                                                                                              | 12 B     | 2.133551 | 3.893285 | 2.748417 | 2.737513 | 1.600774 |  |  |  |  |  |
|                                                                                                                                                              | 13 B     | 3.301937 | 3.207600 | 2.760729 | 2.719143 | 1.849423 |  |  |  |  |  |
| 14 B                                                                                                                                                         | 2.174664 | 2.101494 | 1.661300 | 2.876313 | 3.229021 |          |  |  |  |  |  |
|                                                                                                                                                              | 6        | 7        | 8        | 9        | 10       |          |  |  |  |  |  |
| 6 C                                                                                                                                                          | 0.000000 |          |          |          |          |          |  |  |  |  |  |
| 7 B                                                                                                                                                          | 3.620355 | 0.000000 |          |          |          |          |  |  |  |  |  |
| 8 B                                                                                                                                                          | 2.844777 | 3.038245 | 0.000000 |          |          |          |  |  |  |  |  |
| 9 B                                                                                                                                                          | 1.534855 | 3.879831 | 1.821012 | 0.000000 |          |          |  |  |  |  |  |
| 10 B                                                                                                                                                         | 1.581407 | 2.885447 | 3.392282 | 2.829574 | 0.000000 |          |  |  |  |  |  |
| 11 B                                                                                                                                                         | 2.817392 | 1.748777 | 3.737065 | 3.735204 | 1.766448 |          |  |  |  |  |  |
| 12 B                                                                                                                                                         | 3.206067 | 1.764656 | 3.321361 | 3.548633 | 2.970312 |          |  |  |  |  |  |
| 13 B                                                                                                                                                         | 1.694631 | 2.899095 | 3.349017 | 2.613229 | 1.876784 |          |  |  |  |  |  |
| 14 B                                                                                                                                                         | 3.263555 | 1.776515 | 1.762648 | 3.033455 | 2.915259 |          |  |  |  |  |  |
|                                                                                                                                                              | 11       | 12       | 13       | 14       |          |          |  |  |  |  |  |
| 11 B                                                                                                                                                         | 0.000000 |          |          |          |          |          |  |  |  |  |  |
| 12 B                                                                                                                                                         | 1.733668 | 0.000000 |          |          |          |          |  |  |  |  |  |
| 13 B                                                                                                                                                         | 1.828051 | 1.849238 | 0.000000 |          |          |          |  |  |  |  |  |
| 14 B                                                                                                                                                         | 2.853375 | 2.951523 | 3.400813 | 0.000000 |          |          |  |  |  |  |  |

|  |  |      |          |          |          |          |
|--|--|------|----------|----------|----------|----------|
|  |  | 1    | 2        | 3        | 4        | 5        |
|  |  | 1 Fe | 0.000000 |          |          |          |
|  |  | 2 Fe | 3.750607 | 0.000000 |          |          |
|  |  | 3 C  | 3.180805 | 1.978570 | 0.000000 |          |
|  |  | 4 C  | 2.079511 | 2.133156 | 2.765555 | 0.000000 |
|  |  | 5 C  | 3.748144 | 2.031099 | 1.438746 | 3.112275 |
|  |  | 6 C  | 2.062552 | 3.891939 | 2.742866 | 3.168738 |
|  |  | 7 B  | 2.087061 | 3.352071 | 3.757625 | 1.665592 |
|  |  | 8 B  | 2.115029 | 2.128804 | 1.613887 | 1.651915 |
|  |  | 9 B  | 3.879415 | 2.167575 | 2.725473 | 2.842290 |
|  |  | 10 B | 2.128327 | 4.063588 | 3.667444 | 2.879494 |
|  |  | 11 B | 3.203140 | 3.345141 | 2.740899 | 3.284495 |
|  |  | 12 B | 3.286324 | 2.103935 | 3.298334 | 1.667617 |
|  |  | 13 B | 2.090437 | 3.335332 | 1.741299 | 2.938103 |
|  |  | 14 B | 3.267198 | 3.326180 | 3.697024 | 2.739836 |
|  |  |      | 6        | 7        | 8        | 9        |
|  |  | 6 C  | 0.000000 |          |          |          |
|  |  | 7 B  | 2.865484 | 0.000000 |          |          |
|  |  | 8 B  | 2.837589 | 2.964207 | 0.000000 |          |
|  |  | 9 B  | 3.183242 | 2.889948 | 3.280654 | 0.000000 |
|  |  | 10 B | 1.581928 | 1.776074 | 3.392984 | 2.980473 |
|  |  | 11 B | 1.692772 | 2.890744 | 3.332612 | 1.827936 |
|  |  | 12 B | 3.603492 | 1.767502 | 2.936150 | 1.788112 |
|  |  | 13 B | 1.534765 | 3.437881 | 1.832579 | 3.507380 |
|  |  | 14 B | 2.806828 | 1.771969 | 3.671619 | 1.735460 |
|  |  |      | 11       | 12       | 13       | 14       |
|  |  | 11 B | 0.000000 |          |          |          |
|  |  | 12 B | 2.902056 | 0.000000 |          |          |
|  |  | 13 B | 2.600235 | 3.829200 | 0.000000 |          |
|  |  | 14 B | 1.831140 | 1.758948 | 3.706890 | 0.000000 |

  

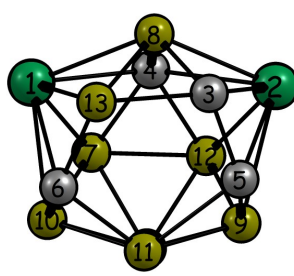

15. -3271.666370 +31.5  $C_1$

WBI: Fe1-Fe2: 0.1719

|                                                                                                                                                              |          |          |          |          |          |          |  |
|--------------------------------------------------------------------------------------------------------------------------------------------------------------|----------|----------|----------|----------|----------|----------|--|
| 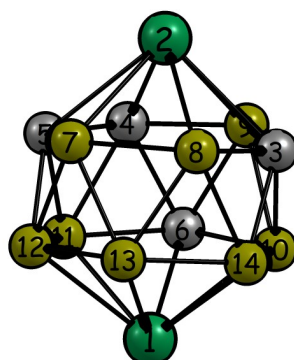 <p>16. -3271.666054 +31.7 <math>C_1</math></p> <p>WBI: Fe1-Fe2: 0.0678</p> |          | 1        | 2        | 3        | 4        | 5        |  |
|                                                                                                                                                              | 1 Fe     | 0.000000 |          |          |          |          |  |
|                                                                                                                                                              | 2 Fe     | 4.108903 | 0.000000 |          |          |          |  |
|                                                                                                                                                              | 3 C      | 3.156153 | 2.153642 | 0.000000 |          |          |  |
|                                                                                                                                                              | 4 C      | 3.139443 | 2.066481 | 2.766069 | 0.000000 |          |  |
|                                                                                                                                                              | 5 C      | 3.124276 | 2.142685 | 3.230610 | 1.559716 | 0.000000 |  |
|                                                                                                                                                              | 6 C      | 2.048860 | 3.192796 | 2.652638 | 1.633460 | 2.621508 |  |
|                                                                                                                                                              | 7 B      | 3.295446 | 2.168072 | 2.913059 | 2.820950 | 1.658029 |  |
|                                                                                                                                                              | 8 B      | 3.300895 | 2.171398 | 1.663769 | 3.281176 | 2.898586 |  |
|                                                                                                                                                              | 9 B      | 3.274517 | 2.096756 | 1.639412 | 1.644382 | 2.839216 |  |
|                                                                                                                                                              | 10 B     | 2.104176 | 3.323679 | 1.688824 | 2.752182 | 3.494784 |  |
|                                                                                                                                                              | 11 B     | 2.067415 | 3.379124 | 3.561376 | 1.769581 | 1.716304 |  |
|                                                                                                                                                              | 12 B     | 2.153059 | 3.350002 | 3.561645 | 2.771575 | 1.693976 |  |
|                                                                                                                                                              | 13 B     | 2.198372 | 3.329256 | 2.780113 | 3.512619 | 2.766447 |  |
|                                                                                                                                                              | 14 B     | 2.169115 | 3.344862 | 1.696549 | 3.525761 | 3.534639 |  |
|                                                                                                                                                              |          | 6        | 7        | 8        | 9        | 10       |  |
| 6 C                                                                                                                                                          | 0.000000 |          |          |          |          |          |  |
| 7 B                                                                                                                                                          | 3.506893 | 0.000000 |          |          |          |          |  |
| 8 B                                                                                                                                                          | 3.511653 | 1.759827 | 0.000000 |          |          |          |  |
| 9 B                                                                                                                                                          | 1.728377 | 3.388546 | 2.919229 | 0.000000 |          |          |  |
| 10 B                                                                                                                                                         | 1.645902 | 3.654415 | 2.863453 | 1.794526 | 0.000000 |          |  |
| 11 B                                                                                                                                                         | 1.663192 | 2.889183 | 3.687162 | 2.911986 | 2.956377 |          |  |
| 12 B                                                                                                                                                         | 2.890415 | 1.770473 | 2.903288 | 3.661627 | 3.443964 |          |  |
| 13 B                                                                                                                                                         | 3.340409 | 1.772951 | 1.770392 | 3.645777 | 2.994254 |          |  |
| 14 B                                                                                                                                                         | 2.895247 | 2.898963 | 1.764561 | 2.880347 | 1.740764 |          |  |
|                                                                                                                                                              |          | 11       | 12       | 13       | 14       |          |  |
| 11 B                                                                                                                                                         | 0.000000 |          |          |          |          |          |  |
| 12 B                                                                                                                                                         | 1.731023 | 0.000000 |          |          |          |          |  |
| 13 B                                                                                                                                                         | 2.997726 | 1.739062 | 0.000000 |          |          |          |  |
| 14 B                                                                                                                                                         | 3.456123 | 3.007361 | 1.735890 | 0.000000 |          |          |  |

|                                                                                                                                                              |          |          |          |          |          |          |
|--------------------------------------------------------------------------------------------------------------------------------------------------------------|----------|----------|----------|----------|----------|----------|
| 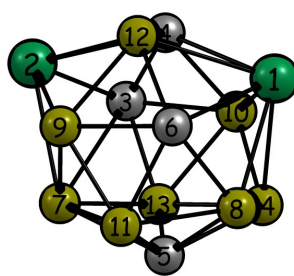 <p>17. -3271.655976 +38.1 <math>C_1</math></p> <p>WBI: Fe1-Fe2: 0.1461</p> | 1        | 2        | 3        | 4        | 5        |          |
|                                                                                                                                                              | 1 Fe     | 0.000000 |          |          |          |          |
|                                                                                                                                                              | 2 Fe     | 3.708444 | 0.000000 |          |          |          |
|                                                                                                                                                              | 3 C      | 3.135092 | 1.941799 | 0.000000 |          |          |
|                                                                                                                                                              | 4 C      | 2.133322 | 2.027158 | 1.531435 | 0.000000 |          |
|                                                                                                                                                              | 5 C      | 3.114361 | 3.471661 | 2.911207 | 3.366856 | 0.000000 |
|                                                                                                                                                              | 6 C      | 2.085054 | 3.176368 | 3.562011 | 2.839572 | 2.596171 |
|                                                                                                                                                              | 7 B      | 3.704823 | 2.144966 | 2.451770 | 3.034826 | 1.726164 |
|                                                                                                                                                              | 8 B      | 2.088869 | 4.034430 | 3.652125 | 3.359526 | 1.710943 |
|                                                                                                                                                              | 9 B      | 3.328066 | 2.036457 | 3.182865 | 2.889095 | 2.763587 |
|                                                                                                                                                              | 10 B     | 2.110085 | 3.252191 | 1.654791 | 1.740576 | 2.795478 |
|                                                                                                                                                              | 11 B     | 3.281152 | 3.343980 | 3.672910 | 3.647730 | 1.649989 |
|                                                                                                                                                              | 12 B     | 2.145474 | 2.095095 | 2.769100 | 1.647257 | 3.375886 |
|                                                                                                                                                              | 13 B     | 3.219271 | 2.974919 | 1.614033 | 2.652157 | 1.681815 |
| 14 B                                                                                                                                                         | 2.156418 | 3.989821 | 2.787781 | 2.929434 | 1.718002 |          |
|                                                                                                                                                              | 6        | 7        | 8        | 9        | 10       |          |
| 6 C                                                                                                                                                          | 0.000000 |          |          |          |          |          |
| 7 B                                                                                                                                                          | 2.706747 | 0.000000 |          |          |          |          |
| 8 B                                                                                                                                                          | 1.663328 | 2.875175 | 0.000000 |          |          |          |
| 9 B                                                                                                                                                          | 1.711780 | 1.758754 | 2.874411 | 0.000000 |          |          |
| 10 B                                                                                                                                                         | 3.375061 | 3.263276 | 2.974231 | 3.798269 | 0.000000 |          |
| 11 B                                                                                                                                                         | 1.681220 | 1.791034 | 1.762826 | 1.725199 | 3.787147 |          |
| 12 B                                                                                                                                                         | 1.675464 | 2.875337 | 2.944017 | 1.800742 | 2.979877 |          |
| 13 B                                                                                                                                                         | 3.461248 | 2.054674 | 2.879520 | 3.346835 | 1.786521 |          |
| 14 B                                                                                                                                                         | 2.914890 | 3.033025 | 1.734792 | 3.693591 | 1.703588 |          |
|                                                                                                                                                              | 11       | 12       | 13       | 14       |          |          |
| 11 B                                                                                                                                                         | 0.000000 |          |          |          |          |          |
| 12 B                                                                                                                                                         | 2.871134 | 0.000000 |          |          |          |          |
| 13 B                                                                                                                                                         | 3.025497 | 3.448415 | 0.000000 |          |          |          |
| 14 B                                                                                                                                                         | 2.916788 | 3.416817 | 1.798461 | 0.000000 |          |          |

Table S5B: Energy ranking for the lowest-lying  $\text{Cp}_2\text{Fe}_2\text{C}_4\text{B}_8\text{H}_{12}$  optimized structures at the B3LYP/6-31G(d) level of theory.

| No. | Initial structure             | Final Energy (a.u.) | Relative Energy (kcal/mol) |
|-----|-------------------------------|---------------------|----------------------------|
| 1   | 14v-01-OmnicapCube—fe2c4—64   | -3272.520232        | 0.0                        |
| 2   | 14v-02-BicapHexAnPr—fe2c4—442 | -3272.52021         | 0.0                        |
| 3   | 14v-01-OmnicapCube—fe2c4—84   | -3272.520064        | 0.1                        |
| 4   | 14v-06-OmnicapOh—fe2c4—2052   | -3272.520062        | 0.1                        |
| 5   | 14v-06-OmnicapOh—fe2c4—2304   | -3272.519869        | 0.2                        |
| 6   | 14v-01-OmnicapCube—fe2c4—58   | -3272.519584        | 0.4                        |
| 7   | 14v-06-OmnicapOh—fe2c4—2017   | -3272.519521        | 0.4                        |
| 8   | 14v-02-BicapHexAnPr—fe2c4—472 | -3272.51951         | 0.5                        |
| 9   | 14v-04-HepPr—fe2c4—1434       | -3272.519306        | 0.6                        |
| 10  | 14v-01-OmnicapCube—fe2c4—67   | -3272.519235        | 0.6                        |
| 11  | 14v-02-BicapHexAnPr—fe2c4—439 | -3272.518255        | 1.2                        |
| 12  | 14v-06-OmnicapOh—fe2c4—2034   | -3272.517949        | 1.4                        |
| 13  | 14v-02-BicapHexAnPr—fe2c4—455 | -3272.517898        | 1.5                        |
| 14  | 14v-01-OmnicapCube—fe2c4—92   | -3272.517754        | 1.6                        |
| 15  | 14v-02-BicapHexAnPr—fe2c4—446 | -3272.517747        | 1.6                        |
| 16  | 14v-06-OmnicapOh—fe2c4—2048   | -3272.517643        | 1.6                        |
| 17  | 14v-06-OmnicapOh—fe2c4—2053   | -3272.517587        | 1.7                        |
| 18  | 14v-02-BicapHexAnPr—fe2c4—449 | -3272.499265        | 13.2                       |
| 19  | 14v-03-BicapHexPr—fe2c4—1211  | -3272.499124        | 13.2                       |
| 20  | 14v-03-BicapHexPr—fe2c4—1248  | -3272.499052        | 13.3                       |
| 21  | 14v-06-OmnicapOh—fe2c4—2146   | -3272.498915        | 13.4                       |
| 22  | 14v-04-HepPr—fe2c4—1524       | -3272.498708        | 13.5                       |
| 23  | 14v-02-BicapHexAnPr—fe2c4—459 | -3272.49869         | 13.5                       |
| 24  | 14v-02-BicapHexAnPr—fe2c4—616 | -3272.4951          | 15.8                       |
| 25  | 14v-03-BicapHexPr—fe2c4—1238  | -3272.49509         | 15.8                       |
| 26  | 14v-03-BicapHexPr—fe2c4—963   | -3272.494861        | 15.9                       |
| 27  | 14v-02-BicapHexAnPr—fe2c4—610 | -3272.494796        | 16.0                       |
| 28  | 14v-03-BicapHexPr—fe2c4—1212  | -3272.494618        | 16.1                       |
| 29  | 14v-01-OmnicapCube—fe2c4—49   | -3272.494614        | 16.1                       |
| 30  | 14v-01-OmnicapCube—fe2c4—94   | -3272.494486        | 16.2                       |
| 31  | 14v-03-BicapHexPr—fe2c4—901   | -3272.494473        | 16.2                       |
| 32  | 14v-06-OmnicapOh—fe2c4—2044   | -3272.494408        | 16.2                       |
| 33  | 14v-03-BicapHexPr—fe2c4—1206  | -3272.494366        | 16.2                       |
| 34  | 14v-02-BicapHexAnPr—fe2c4—477 | -3272.494338        | 16.2                       |
| 35  | 14v-02-BicapHexAnPr—fe2c4—457 | -3272.494247        | 16.3                       |
| 36  | 14v-01-OmnicapCube—fe2c4—54   | -3272.493968        | 16.5                       |
| 37  | 14v-02-BicapHexAnPr—fe2c4—464 | -3272.493654        | 16.7                       |
| 38  | 14v-02-BicapHexAnPr—fe2c4—452 | -3272.493647        | 16.7                       |
| 39  | 14v-02-BicapHexAnPr—fe2c4—453 | -3272.493561        | 16.7                       |
| 40  | 14v-02-BicapHexAnPr—fe2c4—445 | -3272.493323        | 16.9                       |
| 41  | 14v-03-BicapHexPr—fe2c4—1225  | -3272.493296        | 16.9                       |
| 42  | 14v-03-BicapHexPr—fe2c4—1241  | -3272.493248        | 16.9                       |
| 43  | 14v-02-BicapHexAnPr—fe2c4—467 | -3272.493233        | 16.9                       |
| 44  | 14v-01-OmnicapCube—fe2c4—52   | -3272.49295         | 17.1                       |
| 45  | 14v-02-BicapHexAnPr—fe2c4—473 | -3272.492801        | 17.2                       |
| 46  | 14v-02-BicapHexAnPr—fe2c4—450 | -3272.492687        | 17.3                       |
| 47  | 14v-02-BicapHexAnPr—fe2c4—438 | -3272.492539        | 17.4                       |
| 48  | 14v-02-BicapHexAnPr—fe2c4—474 | -3272.492462        | 17.4                       |



|    |                                 |              |      |
|----|---------------------------------|--------------|------|
| 49 | 14v-03-BicapHexPr--fe2c4--1239  | -3272.492107 | 17.6 |
| 50 | 14v-02-BicapHexAnPr--fe2c4--447 | -3272.491471 | 18.0 |
| 51 | 14v-02-BicapHexAnPr--fe2c4--465 | -3272.491434 | 18.1 |
| 52 | 14v-02-BicapHexAnPr--fe2c4--437 | -3272.491297 | 18.2 |
| 53 | 14v-03-BicapHexPr--fe2c4--1209  | -3272.491005 | 18.3 |
| 54 | 14v-02-BicapHexAnPr--fe2c4--436 | -3272.490869 | 18.4 |
| 55 | 14v-03-BicapHexPr--fe2c4--1207  | -3272.490866 | 18.4 |
| 56 | 14v-03-BicapHexPr--fe2c4--866   | -3272.490763 | 18.5 |
| 57 | 14v-01-OmnicapCube--fe2c4--51   | -3272.490627 | 18.6 |
| 58 | 14v-02-BicapHexAnPr--fe2c4--478 | -3272.490525 | 18.6 |
| 59 | 14v-03-BicapHexPr--fe2c4--870   | -3272.49046  | 18.7 |
| 60 | 14v-02-BicapHexAnPr--fe2c4--433 | -3272.490387 | 18.7 |
| 61 | 14v-06-OmnicapOh--fe2c4--2062   | -3272.490363 | 18.7 |
| 62 | 14v-02-BicapHexAnPr--fe2c4--458 | -3272.488398 | 20.0 |
| 63 | 14v-03-BicapHexPr--fe2c4--868   | -3272.488253 | 20.1 |
| 64 | 14v-02-BicapHexAnPr--fe2c4--466 | -3272.487549 | 20.5 |
| 65 | 14v-02-BicapHexAnPr--fe2c4--475 | -3272.48703  | 20.8 |
| 66 | 14v-03-BicapHexPr--fe2c4--1038  | -3272.482312 | 23.8 |
| 67 | 14v-03-BicapHexPr--fe2c4--1024  | -3272.481022 | 24.6 |
| 68 | 14v-02-BicapHexAnPr--fe2c4--407 | -3272.479938 | 25.3 |
| 69 | 14v-05-HepAnPr--fe2c4--1864     | -3272.479669 | 25.5 |
| 70 | 14v-03-BicapHexPr--fe2c4--1197  | -3272.479531 | 25.5 |
| 71 | 14v-03-BicapHexPr--fe2c4--857   | -3272.479518 | 25.5 |
| 72 | 14v-04-HepPr--fe2c4--1533       | -3272.478299 | 26.3 |
| 73 | 14v-01-OmnicapCube--fe2c4--280  | -3272.477982 | 26.5 |
| 74 | 14v-06-OmnicapOh--fe2c4--2160   | -3272.477861 | 26.6 |
| 75 | 14v-06-OmnicapOh--fe2c4--2145   | -3272.477307 | 26.9 |
| 76 | 14v-04-HepPr--fe2c4--1463       | -3272.477151 | 27.0 |
| 77 | 14v-03-BicapHexPr--fe2c4--1186  | -3272.476713 | 27.3 |
| 78 | 14v-03-BicapHexPr--fe2c4--1196  | -3272.476564 | 27.4 |
| 79 | 14v-01-OmnicapCube--fe2c4--267  | -3272.475886 | 27.8 |
| 80 | 14v-03-BicapHexPr--fe2c4--1158  | -3272.475846 | 27.9 |
| 81 | 14v-02-BicapHexAnPr--fe2c4--425 | -3272.475776 | 27.9 |
| 82 | 14v-02-BicapHexAnPr--fe2c4--396 | -3272.475381 | 28.1 |
| 83 | 14v-01-OmnicapCube--fe2c4--154  | -3272.475361 | 28.2 |
| 84 | 14v-03-BicapHexPr--fe2c4--998   | -3272.475146 | 28.3 |
| 85 | 14v-06-OmnicapOh--fe2c4--2006   | -3272.475081 | 28.3 |
| 86 | 14v-01-OmnicapCube--fe2c4--250  | -3272.474925 | 28.4 |
| 87 | 14v-06-OmnicapOh--fe2c4--2151   | -3272.474771 | 28.5 |
| 88 | 14v-01-OmnicapCube--fe2c4--265  | -3272.474502 | 28.7 |
| 89 | 14v-06-OmnicapOh--fe2c4--2150   | -3272.474469 | 28.7 |
| 90 | 14v-03-BicapHexPr--fe2c4--999   | -3272.473944 | 29.0 |
| 91 | 14v-03-BicapHexPr--fe2c4--1188  | -3272.473805 | 29.1 |
| 92 | 14v-01-OmnicapCube--fe2c4--254  | -3272.473771 | 29.2 |
| 93 | 14v-03-BicapHexPr--fe2c4--824   | -3272.473485 | 29.3 |
| 94 | 14v-03-BicapHexPr--fe2c4--880   | -3272.473481 | 29.3 |
| 95 | 14v-03-BicapHexPr--fe2c4--1191  | -3272.473234 | 29.5 |
| 96 | 14v-02-BicapHexAnPr--fe2c4--451 | -3272.473    | 29.6 |
| 97 | 14v-01-OmnicapCube--fe2c4--262  | -3272.472277 | 30.1 |
| 98 | 14v-03-BicapHexPr--fe2c4--825   | -3272.472221 | 30.1 |
| 99 | 14v-02-BicapHexAnPr--fe2c4--392 | -3272.472165 | 30.2 |

|     |                                |              |      |
|-----|--------------------------------|--------------|------|
| 100 | 14v-06-OmnicapOh—fe2c4—-2271   | -3272.472135 | 30.2 |
| 101 | 14v-03-BicapHexPr—fe2c4—-1185  | -3272.471044 | 30.9 |
| 102 | 14v-02-BicapHexAnPr—fe2c4—-388 | -3272.471035 | 30.9 |
| 103 | 14v-06-OmnicapOh—fe2c4—-2260   | -3272.470921 | 30.9 |
| 104 | 14v-02-BicapHexAnPr—fe2c4—-443 | -3272.470651 | 31.1 |
| 105 | 14v-02-BicapHexAnPr—fe2c4—-469 | -3272.470612 | 31.1 |
| 106 | 14v-01-OmnicapCube—fe2c4—-298  | -3272.470597 | 31.1 |
| 107 | 14v-04-HepPr—fe2c4—-1538       | -3272.470569 | 31.2 |
| 108 | 14v-02-BicapHexAnPr—fe2c4—-461 | -3272.469901 | 31.6 |
| 109 | 14v-03-BicapHexPr—fe2c4—-878   | -3272.469506 | 31.8 |
| 110 | 14v-02-BicapHexAnPr—fe2c4—-448 | -3272.469398 | 31.9 |
| 111 | 14v-04-HepPr—fe2c4—-1395       | -3272.467001 | 33.4 |
| 112 | 14v-03-BicapHexPr—fe2c4—-881   | -3272.46623  | 33.9 |
| 113 | 14v-03-BicapHexPr—fe2c4—-879   | -3272.466209 | 33.9 |
| 114 | 14v-03-BicapHexPr—fe2c4—-849   | -3272.466121 | 34.0 |
| 115 | 14v-03-BicapHexPr—fe2c4—-1162  | -3272.465809 | 34.2 |
| 116 | 14v-03-BicapHexPr—fe2c4—-980   | -3272.465797 | 34.2 |
| 117 | 14v-03-BicapHexPr—fe2c4—-1010  | -3272.465501 | 34.3 |
| 118 | 14v-03-BicapHexPr—fe2c4—-1159  | -3272.465338 | 34.4 |
| 119 | 14v-06-OmnicapOh—fe2c4—-2261   | -3272.465247 | 34.5 |
| 120 | 14v-06-OmnicapOh—fe2c4—-2142   | -3272.465119 | 34.6 |
| 121 | 14v-03-BicapHexPr—fe2c4—-1179  | -3272.465011 | 34.7 |
| 122 | 14v-04-HepPr—fe2c4—-1515       | -3272.464576 | 34.9 |
| 123 | 14v-06-OmnicapOh—fe2c4—-2018   | -3272.463963 | 35.3 |
| 124 | 14v-03-BicapHexPr—fe2c4—-904   | -3272.463901 | 35.3 |
| 125 | 14v-06-OmnicapOh—fe2c4—-2049   | -3272.463712 | 35.5 |
| 126 | 14v-01-OmnicapCube—fe2c4—-78   | -3272.463638 | 35.5 |
| 127 | 14v-03-BicapHexPr—fe2c4—-1203  | -3272.463578 | 35.6 |
| 128 | 14v-02-BicapHexAnPr—fe2c4—-441 | -3272.463285 | 35.7 |
| 129 | 14v-02-BicapHexAnPr—fe2c4—-456 | -3272.463116 | 35.8 |
| 130 | 14v-02-BicapHexAnPr—fe2c4—-440 | -3272.463018 | 35.9 |
| 131 | 14v-03-BicapHexPr—fe2c4—-1154  | -3272.462926 | 36.0 |
| 132 | 14v-02-BicapHexAnPr—fe2c4—-454 | -3272.462895 | 36.0 |
| 133 | 14v-02-BicapHexAnPr—fe2c4—-468 | -3272.46287  | 36.0 |
| 134 | 14v-02-BicapHexAnPr—fe2c4—-444 | -3272.46271  | 36.1 |
| 135 | 14v-04-HepPr—fe2c4—-1472       | -3272.462632 | 36.1 |
| 136 | 14v-02-BicapHexAnPr—fe2c4—-434 | -3272.462047 | 36.5 |
| 137 | 14v-01-OmnicapCube—fe2c4—-297  | -3272.462014 | 36.5 |
| 138 | 14v-03-BicapHexPr—fe2c4—-979   | -3272.461906 | 36.6 |
| 139 | 14v-06-OmnicapOh—fe2c4—-2033   | -3272.461876 | 36.6 |
| 140 | 14v-06-OmnicapOh—fe2c4—-2037   | -3272.461856 | 36.6 |
| 141 | 14v-03-BicapHexPr—fe2c4—-819   | -3272.461798 | 36.7 |
| 142 | 14v-03-BicapHexPr—fe2c4—-1226  | -3272.461539 | 36.8 |
| 143 | 14v-03-BicapHexPr—fe2c4—-1032  | -3272.461171 | 37.1 |
| 144 | 14v-03-BicapHexPr—fe2c4—-826   | -3272.460959 | 37.2 |
| 145 | 14v-01-OmnicapCube—fe2c4—-286  | -3272.460708 | 37.4 |
| 146 | 14v-03-BicapHexPr—fe2c4—-1182  | -3272.460686 | 37.4 |
| 147 | 14v-02-BicapHexAnPr—fe2c4—-435 | -3272.460606 | 37.4 |
| 148 | 14v-01-OmnicapCube—fe2c4—-159  | -3272.460186 | 37.7 |
| 149 | 14v-01-OmnicapCube—fe2c4—-283  | -3272.460069 | 37.8 |
| 150 | 14v-01-OmnicapCube—fe2c4—-285  | -3272.459725 | 38.0 |

|     |                                 |              |      |
|-----|---------------------------------|--------------|------|
| 151 | 14v-03-BicapHexPr--fe2c4--853   | -3272.45923  | 38.3 |
| 152 | 14v-02-BicapHexAnPr--fe2c4--462 | -3272.45913  | 38.3 |
| 153 | 14v-03-BicapHexPr--fe2c4--831   | -3272.45858  | 38.7 |
| 154 | 14v-01-OmnicapCube--fe2c4--252  | -3272.458434 | 38.8 |
| 155 | 14v-03-BicapHexPr--fe2c4--834   | -3272.458416 | 38.8 |
| 156 | 14v-02-BicapHexAnPr--fe2c4--479 | -3272.457881 | 39.1 |
| 157 | 14v-02-BicapHexAnPr--fe2c4--400 | -3272.457648 | 39.3 |
| 158 | 14v-02-BicapHexAnPr--fe2c4--395 | -3272.457306 | 39.5 |
| 159 | 14v-04-HepPr--fe2c4--1252       | -3272.456362 | 40.1 |
| 160 | 14v-03-BicapHexPr--fe2c4--1200  | -3272.456227 | 40.2 |
| 161 | 14v-01-OmnicapCube--fe2c4--309  | -3272.456045 | 40.3 |
| 162 | 14v-03-BicapHexPr--fe2c4--858   | -3272.456033 | 40.3 |
| 163 | 14v-01-OmnicapCube--fe2c4--291  | -3272.456029 | 40.3 |
| 164 | 14v-03-BicapHexPr--fe2c4--780   | -3272.455924 | 40.4 |
| 165 | 14v-06-OmnicapOh--fe2c4--2059   | -3272.455909 | 40.4 |
| 166 | 14v-03-BicapHexPr--fe2c4--892   | -3272.455887 | 40.4 |
| 167 | 14v-01-OmnicapCube--fe2c4--300  | -3272.455884 | 40.4 |
| 168 | 14v-03-BicapHexPr--fe2c4--907   | -3272.455857 | 40.4 |
| 169 | 14v-01-OmnicapCube--fe2c4--317  | -3272.455845 | 40.4 |
| 170 | 14v-01-OmnicapCube--fe2c4--311  | -3272.455843 | 40.4 |
| 171 | 14v-01-OmnicapCube--fe2c4--304  | -3272.455806 | 40.4 |
| 172 | 14v-01-OmnicapCube--fe2c4--315  | -3272.455761 | 40.5 |
| 173 | 14v-06-OmnicapOh--fe2c4--2024   | -3272.455682 | 40.5 |
| 174 | 14v-06-OmnicapOh--fe2c4--2043   | -3272.455668 | 40.5 |
| 175 | 14v-01-OmnicapCube--fe2c4--270  | -3272.455632 | 40.5 |
| 176 | 14v-06-OmnicapOh--fe2c4--2061   | -3272.455612 | 40.6 |
| 177 | 14v-03-BicapHexPr--fe2c4--911   | -3272.455605 | 40.6 |
| 178 | 14v-03-BicapHexPr--fe2c4--820   | -3272.455601 | 40.6 |
| 179 | 14v-01-OmnicapCube--fe2c4--22   | -3272.455575 | 40.6 |
| 180 | 14v-03-BicapHexPr--fe2c4--1245  | -3272.455566 | 40.6 |
| 181 | 14v-01-OmnicapCube--fe2c4--253  | -3272.455563 | 40.6 |
| 182 | 14v-06-OmnicapOh--fe2c4--2040   | -3272.455535 | 40.6 |
| 183 | 14v-01-OmnicapCube--fe2c4--329  | -3272.455526 | 40.6 |
| 184 | 14v-03-BicapHexPr--fe2c4--902   | -3272.455525 | 40.6 |
| 185 | 14v-06-OmnicapOh--fe2c4--2014   | -3272.455503 | 40.6 |
| 186 | 14v-01-OmnicapCube--fe2c4--306  | -3272.455481 | 40.6 |
| 187 | 14v-01-OmnicapCube--fe2c4--172  | -3272.455407 | 40.7 |
| 188 | 14v-06-OmnicapOh--fe2c4--2045   | -3272.455314 | 40.7 |
| 189 | 14v-02-BicapHexAnPr--fe2c4--413 | -3272.455311 | 40.7 |
| 190 | 14v-03-BicapHexPr--fe2c4--875   | -3272.455208 | 40.8 |
| 191 | 14v-03-BicapHexPr--fe2c4--887   | -3272.455029 | 40.9 |
| 192 | 14v-03-BicapHexPr--fe2c4--876   | -3272.455012 | 40.9 |
| 193 | 14v-06-OmnicapOh--fe2c4--2119   | -3272.454997 | 40.9 |
| 194 | 14v-01-OmnicapCube--fe2c4--294  | -3272.454973 | 41.0 |
| 195 | 14v-03-BicapHexPr--fe2c4--905   | -3272.454972 | 41.0 |
| 196 | 14v-02-BicapHexAnPr--fe2c4--410 | -3272.454949 | 41.0 |
| 197 | 14v-03-BicapHexPr--fe2c4--900   | -3272.454924 | 41.0 |
| 198 | 14v-03-BicapHexPr--fe2c4--889   | -3272.45477  | 41.1 |
| 199 | 14v-01-OmnicapCube--fe2c4--323  | -3272.454632 | 41.2 |
| 200 | 14v-01-OmnicapCube--fe2c4--299  | -3272.454618 | 41.2 |
| 201 | 14v-01-OmnicapCube--fe2c4--307  | -3272.454114 | 41.5 |

|     |                               |              |      |
|-----|-------------------------------|--------------|------|
| 202 | 14v-01-OmnicapCube—fe2c4—303  | -3272.45411  | 41.5 |
| 203 | 14v-02-BicapHexAnPr—fe2c4—403 | -3272.453968 | 41.6 |
| 204 | 14v-03-BicapHexPr—fe2c4—840   | -3272.453953 | 41.6 |
| 205 | 14v-03-BicapHexPr—fe2c4—910   | -3272.453871 | 41.6 |
| 206 | 14v-01-OmnicapCube—fe2c4—192  | -3272.453727 | 41.7 |
| 207 | 14v-01-OmnicapCube—fe2c4—186  | -3272.453583 | 41.8 |
| 208 | 14v-04-HepPr—fe2c4—1341       | -3272.453426 | 41.9 |
| 209 | 14v-03-BicapHexPr—fe2c4—844   | -3272.453384 | 41.9 |
| 210 | 14v-03-BicapHexPr—fe2c4—1025  | -3272.453099 | 42.1 |
| 211 | 14v-02-BicapHexAnPr—fe2c4—427 | -3272.45307  | 42.1 |
| 212 | 14v-06-OmnicapOh—fe2c4—2149   | -3272.453019 | 42.2 |
| 213 | 14v-03-BicapHexPr—fe2c4—843   | -3272.452641 | 42.4 |
| 214 | 14v-01-OmnicapCube—fe2c4—295  | -3272.452293 | 42.6 |
| 215 | 14v-01-OmnicapCube—fe2c4—313  | -3272.452274 | 42.6 |
| 216 | 14v-02-BicapHexAnPr—fe2c4—387 | -3272.452168 | 42.7 |
| 217 | 14v-03-BicapHexPr—fe2c4—1173  | -3272.452121 | 42.7 |
| 218 | 14v-06-OmnicapOh—fe2c4—1973   | -3272.451878 | 42.9 |
| 219 | 14v-03-BicapHexPr—fe2c4—1037  | -3272.451629 | 43.0 |
| 220 | 14v-01-OmnicapCube—fe2c4—131  | -3272.451554 | 43.1 |
| 221 | 14v-03-BicapHexPr—fe2c4—891   | -3272.451058 | 43.4 |
| 222 | 14v-06-OmnicapOh—fe2c4—1993   | -3272.451006 | 43.4 |
| 223 | 14v-03-BicapHexPr—fe2c4—1198  | -3272.450853 | 43.5 |
| 224 | 14v-01-OmnicapCube—fe2c4—178  | -3272.450817 | 43.6 |
| 225 | 14v-02-BicapHexAnPr—fe2c4—430 | -3272.450486 | 43.8 |
| 226 | 14v-03-BicapHexPr—fe2c4—1012  | -3272.450008 | 44.1 |
| 227 | 14v-03-BicapHexPr—fe2c4—851   | -3272.449982 | 44.1 |
| 228 | 14v-02-BicapHexAnPr—fe2c4—397 | -3272.449728 | 44.2 |
| 229 | 14v-06-OmnicapOh—fe2c4—2081   | -3272.449476 | 44.4 |
| 230 | 14v-06-OmnicapOh—fe2c4—2132   | -3272.449474 | 44.4 |
| 231 | 14v-01-OmnicapCube—fe2c4—157  | -3272.449381 | 44.5 |
| 232 | 14v-01-OmnicapCube—fe2c4—236  | -3272.44936  | 44.5 |
| 233 | 14v-01-OmnicapCube—fe2c4—196  | -3272.449302 | 44.5 |
| 234 | 14v-02-BicapHexAnPr—fe2c4—405 | -3272.449228 | 44.6 |
| 235 | 14v-02-BicapHexAnPr—fe2c4—537 | -3272.448956 | 44.7 |
| 236 | 14v-03-BicapHexPr—fe2c4—966   | -3272.448755 | 44.9 |
| 237 | 14v-02-BicapHexAnPr—fe2c4—399 | -3272.448663 | 44.9 |
| 238 | 14v-03-BicapHexPr—fe2c4—821   | -3272.448626 | 44.9 |
| 239 | 14v-01-OmnicapCube—fe2c4—90   | -3272.448614 | 44.9 |
| 240 | 14v-03-BicapHexPr—fe2c4—836   | -3272.448534 | 45.0 |
| 241 | 14v-03-BicapHexPr—fe2c4—1014  | -3272.448383 | 45.1 |
| 242 | 14v-03-BicapHexPr—fe2c4—1101  | -3272.448289 | 45.1 |
| 243 | 14v-03-BicapHexPr—fe2c4—864   | -3272.448059 | 45.3 |
| 244 | 14v-06-OmnicapOh—fe2c4—1939   | -3272.44793  | 45.4 |
| 245 | 14v-02-BicapHexAnPr—fe2c4—389 | -3272.447875 | 45.4 |
| 246 | 14v-02-BicapHexAnPr—fe2c4—402 | -3272.447593 | 45.6 |
| 247 | 14v-03-BicapHexPr—fe2c4—1048  | -3272.447339 | 45.7 |
| 248 | 14v-06-OmnicapOh—fe2c4—2249   | -3272.447311 | 45.8 |
| 249 | 14v-03-BicapHexPr—fe2c4—830   | -3272.447293 | 45.8 |
| 250 | 14v-01-OmnicapCube—fe2c4—263  | -3272.446833 | 46.1 |
| 251 | 14v-01-OmnicapCube—fe2c4—246  | -3272.446717 | 46.1 |
| 252 | 14v-04-HepPr—fe2c4—1274       | -3272.446495 | 46.3 |

|     |                               |              |      |
|-----|-------------------------------|--------------|------|
| 253 | 14v-02-BicapHexAnPr—fe2c4—346 | -3272.446404 | 46.3 |
| 254 | 14v-04-HepPr—fe2c4—1457       | -3272.446397 | 46.3 |
| 255 | 14v-03-BicapHexPr—fe2c4—856   | -3272.446233 | 46.4 |
| 256 | 14v-02-BicapHexAnPr—fe2c4—677 | -3272.445953 | 46.6 |
| 257 | 14v-03-BicapHexPr—fe2c4—850   | -3272.445648 | 46.8 |
| 258 | 14v-03-BicapHexPr—fe2c4—817   | -3272.445588 | 46.8 |
| 259 | 14v-05-HepAnPr—fe2c4—1847     | -3272.445526 | 46.9 |
| 260 | 14v-03-BicapHexPr—fe2c4—1000  | -3272.445473 | 46.9 |
| 261 | 14v-06-OmnicapOh—fe2c4—2290   | -3272.445147 | 47.1 |
| 262 | 14v-06-OmnicapOh—fe2c4—1931   | -3272.4451   | 47.1 |
| 263 | 14v-04-HepPr—fe2c4—1429       | -3272.444898 | 47.3 |
| 264 | 14v-02-BicapHexAnPr—fe2c4—408 | -3272.444678 | 47.4 |
| 265 | 14v-05-HepAnPr—fe2c4—1767     | -3272.444357 | 47.6 |
| 266 | 14v-02-BicapHexAnPr—fe2c4—419 | -3272.444222 | 47.7 |
| 267 | 14v-03-BicapHexPr—fe2c4—1161  | -3272.444174 | 47.7 |
| 268 | 14v-02-BicapHexAnPr—fe2c4—613 | -3272.444014 | 47.8 |
| 269 | 14v-04-HepPr—fe2c4—1375       | -3272.443439 | 48.2 |
| 270 | 14v-03-BicapHexPr—fe2c4—860   | -3272.44334  | 48.3 |
| 271 | 14v-03-BicapHexPr—fe2c4—1049  | -3272.4433   | 48.3 |
| 272 | 14v-06-OmnicapOh—fe2c4—2003   | -3272.443055 | 48.4 |
| 273 | 14v-02-BicapHexAnPr—fe2c4—429 | -3272.443049 | 48.4 |
| 274 | 14v-05-HepAnPr—fe2c4—1841     | -3272.442938 | 48.5 |
| 275 | 14v-06-OmnicapOh—fe2c4—2227   | -3272.442891 | 48.5 |
| 276 | 14v-03-BicapHexPr—fe2c4—1190  | -3272.442578 | 48.7 |
| 277 | 14v-03-BicapHexPr—fe2c4—1189  | -3272.442571 | 48.7 |
| 278 | 14v-06-OmnicapOh—fe2c4—2083   | -3272.442496 | 48.8 |
| 279 | 14v-03-BicapHexPr—fe2c4—854   | -3272.442244 | 48.9 |
| 280 | 14v-02-BicapHexAnPr—fe2c4—398 | -3272.442017 | 49.1 |
| 281 | 14v-01-OmnicapCube—fe2c4—175  | -3272.441836 | 49.2 |
| 282 | 14v-01-OmnicapCube—fe2c4—103  | -3272.441793 | 49.2 |
| 283 | 14v-02-BicapHexAnPr—fe2c4—340 | -3272.441482 | 49.4 |
| 284 | 14v-04-HepPr—fe2c4—1507       | -3272.441467 | 49.4 |
| 285 | 14v-06-OmnicapOh—fe2c4—2153   | -3272.441375 | 49.5 |
| 286 | 14v-06-OmnicapOh—fe2c4—2133   | -3272.441294 | 49.5 |
| 287 | 14v-03-BicapHexPr—fe2c4—1174  | -3272.441255 | 49.6 |
| 288 | 14v-01-OmnicapCube—fe2c4—93   | -3272.441189 | 49.6 |
| 289 | 14v-01-OmnicapCube—fe2c4—79   | -3272.441183 | 49.6 |
| 290 | 14v-01-OmnicapCube—fe2c4—72   | -3272.441178 | 49.6 |
| 291 | 14v-01-OmnicapCube—fe2c4—96   | -3272.441176 | 49.6 |
| 292 | 14v-01-OmnicapCube—fe2c4—332  | -3272.441025 | 49.7 |
| 293 | 14v-02-BicapHexAnPr—fe2c4—345 | -3272.440913 | 49.8 |
| 294 | 14v-03-BicapHexPr—fe2c4—1222  | -3272.440898 | 49.8 |
| 295 | 14v-03-BicapHexPr—fe2c4—1193  | -3272.440543 | 50.0 |
| 296 | 14v-06-OmnicapOh—fe2c4—2011   | -3272.440279 | 50.2 |
| 297 | 14v-03-BicapHexPr—fe2c4—984   | -3272.440038 | 50.3 |
| 298 | 14v-04-HepPr—fe2c4—1322       | -3272.438813 | 51.1 |
| 299 | 14v-02-BicapHexAnPr—fe2c4—694 | -3272.438795 | 51.1 |
| 300 | 14v-03-BicapHexPr—fe2c4—1192  | -3272.438771 | 51.1 |
| 301 | 14v-05-HepAnPr—fe2c4—1830     | -3272.438619 | 51.2 |
| 302 | 14v-01-OmnicapCube—fe2c4—239  | -3272.438395 | 51.4 |
| 303 | 14v-03-BicapHexPr—fe2c4—1210  | -3272.438328 | 51.4 |

|     |                                 |              |      |
|-----|---------------------------------|--------------|------|
| 304 | 14v-03-BicapHexPr--fe2c4--839   | -3272.438261 | 51.4 |
| 305 | 14v-02-BicapHexAnPr--fe2c4--420 | -3272.438226 | 51.5 |
| 306 | 14v-01-OmnicapCube--fe2c4--335  | -3272.438076 | 51.6 |
| 307 | 14v-03-BicapHexPr--fe2c4--897   | -3272.438021 | 51.6 |
| 308 | 14v-03-BicapHexPr--fe2c4--1229  | -3272.437813 | 51.7 |
| 309 | 14v-03-BicapHexPr--fe2c4--968   | -3272.437651 | 51.8 |
| 310 | 14v-05-HepAnPr--fe2c4--1843     | -3272.437636 | 51.8 |
| 311 | 14v-02-BicapHexAnPr--fe2c4--418 | -3272.437364 | 52.0 |
| 312 | 14v-02-BicapHexAnPr--fe2c4--386 | -3272.437252 | 52.1 |
| 313 | 14v-03-BicapHexPr--fe2c4--1167  | -3272.437125 | 52.2 |
| 314 | 14v-01-OmnicapCube--fe2c4--205  | -3272.436747 | 52.4 |
| 315 | 14v-05-HepAnPr--fe2c4--1896     | -3272.436693 | 52.4 |
| 316 | 14v-05-HepAnPr--fe2c4--1900     | -3272.436603 | 52.5 |
| 317 | 14v-01-OmnicapCube--fe2c4--21   | -3272.436562 | 52.5 |
| 318 | 14v-03-BicapHexPr--fe2c4--918   | -3272.436386 | 52.6 |
| 319 | 14v-06-OmnicapOh--fe2c4--1991   | -3272.436335 | 52.6 |
| 320 | 14v-03-BicapHexPr--fe2c4--1195  | -3272.436297 | 52.7 |
| 321 | 14v-02-BicapHexAnPr--fe2c4--540 | -3272.436235 | 52.7 |
| 322 | 14v-01-OmnicapCube--fe2c4--14   | -3272.436161 | 52.8 |
| 323 | 14v-02-BicapHexAnPr--fe2c4--627 | -3272.436144 | 52.8 |
| 324 | 14v-04-HepPr--fe2c4--1480       | -3272.436059 | 52.8 |
| 325 | 14v-02-BicapHexAnPr--fe2c4--341 | -3272.436014 | 52.8 |
| 326 | 14v-06-OmnicapOh--fe2c4--1985   | -3272.435939 | 52.9 |
| 327 | 14v-03-BicapHexPr--fe2c4--1018  | -3272.435706 | 53.0 |
| 328 | 14v-01-OmnicapCube--fe2c4--279  | -3272.435559 | 53.1 |
| 329 | 14v-06-OmnicapOh--fe2c4--1970   | -3272.435355 | 53.3 |
| 330 | 14v-01-OmnicapCube--fe2c4--257  | -3272.43513  | 53.4 |
| 331 | 14v-06-OmnicapOh--fe2c4--2005   | -3272.435013 | 53.5 |
| 332 | 14v-06-OmnicapOh--fe2c4--2143   | -3272.434805 | 53.6 |
| 333 | 14v-04-HepPr--fe2c4--1488       | -3272.434643 | 53.7 |
| 334 | 14v-02-BicapHexAnPr--fe2c4--426 | -3272.434603 | 53.7 |
| 335 | 14v-06-OmnicapOh--fe2c4--2285   | -3272.434531 | 53.8 |
| 336 | 14v-06-OmnicapOh--fe2c4--2298   | -3272.434524 | 53.8 |
| 337 | 14v-01-OmnicapCube--fe2c4--63   | -3272.434472 | 53.8 |
| 338 | 14v-04-HepPr--fe2c4--1465       | -3272.434395 | 53.9 |
| 339 | 14v-04-HepPr--fe2c4--1394       | -3272.434278 | 53.9 |
| 340 | 14v-03-BicapHexPr--fe2c4--1157  | -3272.434249 | 54.0 |
| 341 | 14v-02-BicapHexAnPr--fe2c4--411 | -3272.434045 | 54.1 |
| 342 | 14v-03-BicapHexPr--fe2c4--1160  | -3272.433996 | 54.1 |
| 343 | 14v-01-OmnicapCube--fe2c4--170  | -3272.43393  | 54.2 |
| 344 | 14v-02-BicapHexAnPr--fe2c4--476 | -3272.433887 | 54.2 |
| 345 | 14v-03-BicapHexPr--fe2c4--1009  | -3272.433871 | 54.2 |
| 346 | 14v-03-BicapHexPr--fe2c4--862   | -3272.433811 | 54.2 |
| 347 | 14v-03-BicapHexPr--fe2c4--1017  | -3272.433792 | 54.2 |
| 348 | 14v-02-BicapHexAnPr--fe2c4--385 | -3272.433747 | 54.3 |
| 349 | 14v-02-BicapHexAnPr--fe2c4--471 | -3272.433735 | 54.3 |
| 350 | 14v-06-OmnicapOh--fe2c4--2020   | -3272.433549 | 54.4 |
| 351 | 14v-03-BicapHexPr--fe2c4--828   | -3272.43352  | 54.4 |
| 352 | 14v-03-BicapHexPr--fe2c4--906   | -3272.43347  | 54.4 |
| 353 | 14v-03-BicapHexPr--fe2c4--1015  | -3272.433463 | 54.4 |
| 354 | 14v-03-BicapHexPr--fe2c4--859   | -3272.433458 | 54.5 |

|     |                                 |              |      |
|-----|---------------------------------|--------------|------|
| 355 | 14v-06-OmnicapOh--fe2c4--1954   | -3272.433399 | 54.5 |
| 356 | 14v-03-BicapHexPr--fe2c4--1008  | -3272.433398 | 54.5 |
| 357 | 14v-02-BicapHexAnPr--fe2c4--460 | -3272.433397 | 54.5 |
| 358 | 14v-06-OmnicapOh--fe2c4--2036   | -3272.433382 | 54.5 |
| 359 | 14v-01-OmnicapCube--fe2c4--296  | -3272.433374 | 54.5 |
| 360 | 14v-03-BicapHexPr--fe2c4--894   | -3272.43335  | 54.5 |
| 361 | 14v-01-OmnicapCube--fe2c4--314  | -3272.433334 | 54.5 |
| 362 | 14v-06-OmnicapOh--fe2c4--2055   | -3272.433292 | 54.6 |
| 363 | 14v-06-OmnicapOh--fe2c4--1965   | -3272.433233 | 54.6 |
| 364 | 14v-02-BicapHexAnPr--fe2c4--470 | -3272.433214 | 54.6 |
| 365 | 14v-01-OmnicapCube--fe2c4--107  | -3272.433196 | 54.6 |
| 366 | 14v-03-BicapHexPr--fe2c4--1240  | -3272.433162 | 54.6 |
| 367 | 14v-03-BicapHexPr--fe2c4--890   | -3272.433117 | 54.7 |
| 368 | 14v-01-OmnicapCube--fe2c4--164  | -3272.433063 | 54.7 |
| 369 | 14v-02-BicapHexAnPr--fe2c4--412 | -3272.432999 | 54.7 |
| 370 | 14v-01-OmnicapCube--fe2c4--316  | -3272.432992 | 54.7 |
| 371 | 14v-01-OmnicapCube--fe2c4--293  | -3272.432987 | 54.7 |
| 372 | 14v-06-OmnicapOh--fe2c4--2047   | -3272.432943 | 54.8 |
| 373 | 14v-06-OmnicapOh--fe2c4--1964   | -3272.432864 | 54.8 |
| 374 | 14v-02-BicapHexAnPr--fe2c4--692 | -3272.4328   | 54.9 |
| 375 | 14v-02-BicapHexAnPr--fe2c4--686 | -3272.432747 | 54.9 |
| 376 | 14v-03-BicapHexPr--fe2c4--795   | -3272.432732 | 54.9 |
| 377 | 14v-03-BicapHexPr--fe2c4--809   | -3272.432661 | 55.0 |
| 378 | 14v-02-BicapHexAnPr--fe2c4--401 | -3272.432612 | 55.0 |
| 379 | 14v-06-OmnicapOh--fe2c4--1987   | -3272.432577 | 55.0 |
| 380 | 14v-01-OmnicapCube--fe2c4--302  | -3272.432469 | 55.1 |
| 381 | 14v-01-OmnicapCube--fe2c4--336  | -3272.432389 | 55.1 |
| 382 | 14v-01-OmnicapCube--fe2c4--333  | -3272.432382 | 55.1 |
| 383 | 14v-03-BicapHexPr--fe2c4--896   | -3272.43235  | 55.1 |
| 384 | 14v-03-BicapHexPr--fe2c4--1216  | -3272.432346 | 55.2 |
| 385 | 14v-03-BicapHexPr--fe2c4--1243  | -3272.432285 | 55.2 |
| 386 | 14v-01-OmnicapCube--fe2c4--320  | -3272.43221  | 55.2 |
| 387 | 14v-01-OmnicapCube--fe2c4--301  | -3272.432209 | 55.2 |
| 388 | 14v-01-OmnicapCube--fe2c4--276  | -3272.43196  | 55.4 |
| 389 | 14v-02-BicapHexAnPr--fe2c4--337 | -3272.431897 | 55.4 |
| 390 | 14v-01-OmnicapCube--fe2c4--275  | -3272.431882 | 55.4 |
| 391 | 14v-06-OmnicapOh--fe2c4--2013   | -3272.43178  | 55.5 |
| 392 | 14v-03-BicapHexPr--fe2c4--1199  | -3272.431769 | 55.5 |
| 393 | 14v-03-BicapHexPr--fe2c4--1244  | -3272.431651 | 55.6 |
| 394 | 14v-01-OmnicapCube--fe2c4--322  | -3272.431533 | 55.7 |
| 395 | 14v-02-BicapHexAnPr--fe2c4--416 | -3272.431472 | 55.7 |
| 396 | 14v-03-BicapHexPr--fe2c4--1111  | -3272.43146  | 55.7 |
| 397 | 14v-03-BicapHexPr--fe2c4--985   | -3272.431454 | 55.7 |
| 398 | 14v-02-BicapHexAnPr--fe2c4--604 | -3272.430972 | 56.0 |
| 399 | 14v-06-OmnicapOh--fe2c4--1949   | -3272.430958 | 56.0 |
| 400 | 14v-03-BicapHexPr--fe2c4--1137  | -3272.43089  | 56.1 |
| 401 | 14v-02-BicapHexAnPr--fe2c4--428 | -3272.430838 | 56.1 |
| 402 | 14v-06-OmnicapOh--fe2c4--1986   | -3272.430807 | 56.1 |
| 403 | 14v-02-BicapHexAnPr--fe2c4--599 | -3272.430598 | 56.2 |
| 404 | 14v-02-BicapHexAnPr--fe2c4--690 | -3272.430513 | 56.3 |
| 405 | 14v-02-BicapHexAnPr--fe2c4--338 | -3272.43048  | 56.3 |

|     |                               |              |      |
|-----|-------------------------------|--------------|------|
| 406 | 14v-01-OmnicapCube—fe2c4—98   | -3272.430341 | 56.4 |
| 407 | 14v-01-OmnicapCube—fe2c4—156  | -3272.430314 | 56.4 |
| 408 | 14v-02-BicapHexAnPr—fe2c4—696 | -3272.430236 | 56.5 |
| 409 | 14v-01-OmnicapCube—fe2c4—199  | -3272.430046 | 56.6 |
| 410 | 14v-03-BicapHexPr—fe2c4—772   | -3272.4299   | 56.7 |
| 411 | 14v-02-BicapHexAnPr—fe2c4—406 | -3272.429872 | 56.7 |
| 412 | 14v-03-BicapHexPr—fe2c4—1164  | -3272.429844 | 56.7 |
| 413 | 14v-01-OmnicapCube—fe2c4—152  | -3272.429773 | 56.8 |
| 414 | 14v-06-OmnicapOh—fe2c4—1955   | -3272.429754 | 56.8 |
| 415 | 14v-01-OmnicapCube—fe2c4—173  | -3272.429352 | 57.0 |
| 416 | 14v-03-BicapHexPr—fe2c4—922   | -3272.429343 | 57.0 |
| 417 | 14v-06-OmnicapOh—fe2c4—2179   | -3272.429264 | 57.1 |
| 418 | 14v-01-OmnicapCube—fe2c4—191  | -3272.428954 | 57.3 |
| 419 | 14v-01-OmnicapCube—fe2c4—185  | -3272.428945 | 57.3 |
| 420 | 14v-02-BicapHexAnPr—fe2c4—751 | -3272.428872 | 57.3 |
| 421 | 14v-01-OmnicapCube—fe2c4—241  | -3272.428755 | 57.4 |
| 422 | 14v-03-BicapHexPr—fe2c4—776   | -3272.428732 | 57.4 |
| 423 | 14v-02-BicapHexAnPr—fe2c4—535 | -3272.428579 | 57.5 |
| 424 | 14v-06-OmnicapOh—fe2c4—2120   | -3272.428541 | 57.5 |
| 425 | 14v-06-OmnicapOh—fe2c4—1969   | -3272.428465 | 57.6 |
| 426 | 14v-02-BicapHexAnPr—fe2c4—563 | -3272.428423 | 57.6 |
| 427 | 14v-02-BicapHexAnPr—fe2c4—607 | -3272.428372 | 57.6 |
| 428 | 14v-02-BicapHexAnPr—fe2c4—578 | -3272.428369 | 57.6 |
| 429 | 14v-02-BicapHexAnPr—fe2c4—597 | -3272.42829  | 57.7 |
| 430 | 14v-06-OmnicapOh—fe2c4—1966   | -3272.428161 | 57.8 |
| 431 | 14v-05-HepAnPr—fe2c4—1849     | -3272.428106 | 57.8 |
| 432 | 14v-01-OmnicapCube—fe2c4—9    | -3272.42787  | 58.0 |
| 433 | 14v-01-OmnicapCube—fe2c4—28   | -3272.427795 | 58.0 |
| 434 | 14v-06-OmnicapOh—fe2c4—2195   | -3272.427759 | 58.0 |
| 435 | 14v-06-OmnicapOh—fe2c4—2189   | -3272.427642 | 58.1 |
| 436 | 14v-06-OmnicapOh—fe2c4—2215   | -3272.427615 | 58.1 |
| 437 | 14v-06-OmnicapOh—fe2c4—2213   | -3272.427613 | 58.1 |
| 438 | 14v-03-BicapHexPr—fe2c4—790   | -3272.427479 | 58.2 |
| 439 | 14v-02-BicapHexAnPr—fe2c4—588 | -3272.427154 | 58.4 |
| 440 | 14v-02-BicapHexAnPr—fe2c4—415 | -3272.427118 | 58.4 |
| 441 | 14v-01-OmnicapCube—fe2c4—281  | -3272.427111 | 58.4 |
| 442 | 14v-02-BicapHexAnPr—fe2c4—753 | -3272.426995 | 58.5 |
| 443 | 14v-03-BicapHexPr—fe2c4—1149  | -3272.426783 | 58.6 |
| 444 | 14v-04-HepPr—fe2c4—1281       | -3272.426772 | 58.6 |
| 445 | 14v-06-OmnicapOh—fe2c4—2207   | -3272.426745 | 58.7 |
| 446 | 14v-04-HepPr—fe2c4—1537       | -3272.426558 | 58.8 |
| 447 | 14v-01-OmnicapCube—fe2c4—62   | -3272.426455 | 58.8 |
| 448 | 14v-03-BicapHexPr—fe2c4—1205  | -3272.426389 | 58.9 |
| 449 | 14v-01-OmnicapCube—fe2c4—310  | -3272.42625  | 59.0 |
| 450 | 14v-06-OmnicapOh—fe2c4—2022   | -3272.42625  | 59.0 |
| 451 | 14v-03-BicapHexPr—fe2c4—956   | -3272.426241 | 59.0 |
| 452 | 14v-01-OmnicapCube—fe2c4—328  | -3272.426223 | 59.0 |
| 453 | 14v-03-BicapHexPr—fe2c4—1151  | -3272.426201 | 59.0 |
| 454 | 14v-03-BicapHexPr—fe2c4—813   | -3272.426148 | 59.0 |
| 455 | 14v-02-BicapHexAnPr—fe2c4—740 | -3272.426125 | 59.1 |
| 456 | 14v-03-BicapHexPr—fe2c4—883   | -3272.426096 | 59.1 |



|     |                               |              |      |
|-----|-------------------------------|--------------|------|
| 457 | 14v-03-BicapHexPr—fe2c4—802   | -3272.426061 | 59.1 |
| 458 | 14v-03-BicapHexPr—fe2c4—886   | -3272.426045 | 59.1 |
| 459 | 14v-01-OmnicapCube—fe2c4—3    | -3272.426036 | 59.1 |
| 460 | 14v-06-OmnicapOh—fe2c4—2060   | -3272.426026 | 59.1 |
| 461 | 14v-05-HepAnPr—fe2c4—1749     | -3272.425962 | 59.2 |
| 462 | 14v-06-OmnicapOh—fe2c4—2185   | -3272.425903 | 59.2 |
| 463 | 14v-02-BicapHexAnPr—fe2c4—598 | -3272.425788 | 59.3 |
| 464 | 14v-06-OmnicapOh—fe2c4—2242   | -3272.425653 | 59.4 |
| 465 | 14v-01-OmnicapCube—fe2c4—38   | -3272.425627 | 59.4 |
| 466 | 14v-02-BicapHexAnPr—fe2c4—404 | -3272.425529 | 59.4 |
| 467 | 14v-03-BicapHexPr—fe2c4—823   | -3272.425369 | 59.5 |
| 468 | 14v-01-OmnicapCube—fe2c4—97   | -3272.425365 | 59.5 |
| 469 | 14v-04-HepPr—fe2c4—1275       | -3272.425333 | 59.6 |
| 470 | 14v-06-OmnicapOh—fe2c4—2244   | -3272.425308 | 59.6 |
| 471 | 14v-01-OmnicapCube—fe2c4—319  | -3272.425306 | 59.6 |
| 472 | 14v-03-BicapHexPr—fe2c4—835   | -3272.425297 | 59.6 |
| 473 | 14v-03-BicapHexPr—fe2c4—1046  | -3272.425284 | 59.6 |
| 474 | 14v-02-BicapHexAnPr—fe2c4—409 | -3272.425258 | 59.6 |
| 475 | 14v-06-OmnicapOh—fe2c4—2182   | -3272.42524  | 59.6 |
| 476 | 14v-01-OmnicapCube—fe2c4—235  | -3272.425207 | 59.6 |
| 477 | 14v-02-BicapHexAnPr—fe2c4—763 | -3272.425197 | 59.6 |
| 478 | 14v-03-BicapHexPr—fe2c4—946   | -3272.425141 | 59.7 |
| 479 | 14v-03-BicapHexPr—fe2c4—961   | -3272.425107 | 59.7 |
| 480 | 14v-02-BicapHexAnPr—fe2c4—373 | -3272.425067 | 59.7 |
| 481 | 14v-01-OmnicapCube—fe2c4—104  | -3272.425037 | 59.7 |
| 482 | 14v-01-OmnicapCube—fe2c4—212  | -3272.425024 | 59.7 |
| 483 | 14v-03-BicapHexPr—fe2c4—1029  | -3272.425016 | 59.7 |
| 484 | 14v-03-BicapHexPr—fe2c4—786   | -3272.425014 | 59.8 |
| 485 | 14v-05-HepAnPr—fe2c4—1867     | -3272.424738 | 59.9 |
| 486 | 14v-02-BicapHexAnPr—fe2c4—605 | -3272.424684 | 60.0 |
| 487 | 14v-04-HepPr—fe2c4—1455       | -3272.424433 | 60.1 |
| 488 | 14v-03-BicapHexPr—fe2c4—1146  | -3272.424426 | 60.1 |
| 489 | 14v-02-BicapHexAnPr—fe2c4—560 | -3272.424369 | 60.2 |
| 490 | 14v-02-BicapHexAnPr—fe2c4—600 | -3272.424024 | 60.4 |
| 491 | 14v-04-HepPr—fe2c4—1494       | -3272.423982 | 60.4 |
| 492 | 14v-02-BicapHexAnPr—fe2c4—700 | -3272.423931 | 60.4 |
| 493 | 14v-02-BicapHexAnPr—fe2c4—585 | -3272.42393  | 60.4 |
| 494 | 14v-06-OmnicapOh—fe2c4—1963   | -3272.423897 | 60.5 |
| 495 | 14v-03-BicapHexPr—fe2c4—838   | -3272.423769 | 60.5 |
| 496 | 14v-03-BicapHexPr—fe2c4—789   | -3272.423759 | 60.5 |
| 497 | 14v-03-BicapHexPr—fe2c4—938   | -3272.423625 | 60.6 |
| 498 | 14v-03-BicapHexPr—fe2c4—1064  | -3272.423614 | 60.6 |
| 499 | 14v-06-OmnicapOh—fe2c4—2296   | -3272.423552 | 60.7 |
| 500 | 14v-02-BicapHexAnPr—fe2c4—538 | -3272.423484 | 60.7 |
| 501 | 14v-02-BicapHexAnPr—fe2c4—347 | -3272.423433 | 60.7 |
| 502 | 14v-03-BicapHexPr—fe2c4—1125  | -3272.423246 | 60.9 |
| 503 | 14v-01-OmnicapCube—fe2c4—187  | -3272.4231   | 61.0 |
| 504 | 14v-01-OmnicapCube—fe2c4—195  | -3272.423099 | 61.0 |
| 505 | 14v-01-OmnicapCube—fe2c4—47   | -3272.42305  | 61.0 |
| 506 | 14v-02-BicapHexAnPr—fe2c4—724 | -3272.422894 | 61.1 |
| 507 | 14v-01-OmnicapCube—fe2c4—43   | -3272.422762 | 61.2 |

|     |                                 |              |      |
|-----|---------------------------------|--------------|------|
| 508 | 14v-02-BicapHexAnPr--fe2c4--678 | -3272.422655 | 61.2 |
| 509 | 14v-02-BicapHexAnPr--fe2c4--422 | -3272.422575 | 61.3 |
| 510 | 14v-02-BicapHexAnPr--fe2c4--619 | -3272.422544 | 61.3 |
| 511 | 14v-02-BicapHexAnPr--fe2c4--431 | -3272.422429 | 61.4 |
| 512 | 14v-02-BicapHexAnPr--fe2c4--617 | -3272.422398 | 61.4 |
| 513 | 14v-03-BicapHexPr--fe2c4--1002  | -3272.422336 | 61.4 |
| 514 | 14v-01-OmnicapCube--fe2c4--148  | -3272.422332 | 61.4 |
| 515 | 14v-03-BicapHexPr--fe2c4--1092  | -3272.422171 | 61.5 |
| 516 | 14v-02-BicapHexAnPr--fe2c4--379 | -3272.422166 | 61.5 |
| 517 | 14v-03-BicapHexPr--fe2c4--1096  | -3272.421963 | 61.7 |
| 518 | 14v-03-BicapHexPr--fe2c4--953   | -3272.421935 | 61.7 |
| 519 | 14v-02-BicapHexAnPr--fe2c4--706 | -3272.421864 | 61.7 |
| 520 | 14v-06-OmnicapOh--fe2c4--2084   | -3272.421764 | 61.8 |
| 521 | 14v-04-HepPr--fe2c4--1562       | -3272.42172  | 61.8 |
| 522 | 14v-02-BicapHexAnPr--fe2c4--370 | -3272.421694 | 61.8 |
| 523 | 14v-02-BicapHexAnPr--fe2c4--463 | -3272.421468 | 62.0 |
| 524 | 14v-01-OmnicapCube--fe2c4--150  | -3272.421456 | 62.0 |
| 525 | 14v-02-BicapHexAnPr--fe2c4--715 | -3272.421451 | 62.0 |
| 526 | 14v-03-BicapHexPr--fe2c4--1140  | -3272.421331 | 62.1 |
| 527 | 14v-03-BicapHexPr--fe2c4--1130  | -3272.421271 | 62.1 |
| 528 | 14v-03-BicapHexPr--fe2c4--1109  | -3272.421166 | 62.2 |
| 529 | 14v-03-BicapHexPr--fe2c4--799   | -3272.421081 | 62.2 |
| 530 | 14v-05-HepAnPr--fe2c4--1670     | -3272.421006 | 62.3 |
| 531 | 14v-06-OmnicapOh--fe2c4--2180   | -3272.421003 | 62.3 |
| 532 | 14v-06-OmnicapOh--fe2c4--2027   | -3272.420945 | 62.3 |
| 533 | 14v-06-OmnicapOh--fe2c4--2042   | -3272.420923 | 62.3 |
| 534 | 14v-01-OmnicapCube--fe2c4--40   | -3272.420907 | 62.3 |
| 535 | 14v-02-BicapHexAnPr--fe2c4--355 | -3272.420756 | 62.4 |
| 536 | 14v-03-BicapHexPr--fe2c4--1171  | -3272.420756 | 62.4 |
| 537 | 14v-02-BicapHexAnPr--fe2c4--622 | -3272.420678 | 62.5 |
| 538 | 14v-02-BicapHexAnPr--fe2c4--541 | -3272.420477 | 62.6 |
| 539 | 14v-03-BicapHexPr--fe2c4--936   | -3272.420466 | 62.6 |
| 540 | 14v-02-BicapHexAnPr--fe2c4--611 | -3272.420455 | 62.6 |
| 541 | 14v-02-BicapHexAnPr--fe2c4--743 | -3272.420356 | 62.7 |
| 542 | 14v-01-OmnicapCube--fe2c4--44   | -3272.420309 | 62.7 |
| 543 | 14v-03-BicapHexPr--fe2c4--1169  | -3272.42021  | 62.8 |
| 544 | 14v-03-BicapHexPr--fe2c4--997   | -3272.420205 | 62.8 |
| 545 | 14v-01-OmnicapCube--fe2c4--139  | -3272.420169 | 62.8 |
| 546 | 14v-01-OmnicapCube--fe2c4--201  | -3272.42015  | 62.8 |
| 547 | 14v-02-BicapHexAnPr--fe2c4--534 | -3272.419975 | 62.9 |
| 548 | 14v-06-OmnicapOh--fe2c4--2287   | -3272.419968 | 62.9 |
| 549 | 14v-02-BicapHexAnPr--fe2c4--568 | -3272.419869 | 63.0 |
| 550 | 14v-06-OmnicapOh--fe2c4--2001   | -3272.419845 | 63.0 |
| 551 | 14v-01-OmnicapCube--fe2c4--259  | -3272.41977  | 63.0 |
| 552 | 14v-02-BicapHexAnPr--fe2c4--656 | -3272.41976  | 63.0 |
| 553 | 14v-06-OmnicapOh--fe2c4--1967   | -3272.419698 | 63.1 |
| 554 | 14v-03-BicapHexPr--fe2c4--1172  | -3272.419651 | 63.1 |
| 555 | 14v-02-BicapHexAnPr--fe2c4--569 | -3272.419644 | 63.1 |
| 556 | 14v-02-BicapHexAnPr--fe2c4--371 | -3272.419614 | 63.1 |
| 557 | 14v-06-OmnicapOh--fe2c4--2004   | -3272.419515 | 63.2 |
| 558 | 14v-06-OmnicapOh--fe2c4--2000   | -3272.419434 | 63.3 |

|     |                                 |              |      |
|-----|---------------------------------|--------------|------|
| 559 | 14v-03-BicapHexPr--fe2c4--788   | -3272.419333 | 63.3 |
| 560 | 14v-03-BicapHexPr--fe2c4--1098  | -3272.419308 | 63.3 |
| 561 | 14v-02-BicapHexAnPr--fe2c4--480 | -3272.419196 | 63.4 |
| 562 | 14v-05-HepAnPr--fe2c4--1780     | -3272.418969 | 63.5 |
| 563 | 14v-02-BicapHexAnPr--fe2c4--374 | -3272.418914 | 63.6 |
| 564 | 14v-01-OmnicapCube--fe2c4--188  | -3272.418907 | 63.6 |
| 565 | 14v-03-BicapHexPr--fe2c4--1013  | -3272.4189   | 63.6 |
| 566 | 14v-03-BicapHexPr--fe2c4--989   | -3272.418771 | 63.7 |
| 567 | 14v-03-BicapHexPr--fe2c4--852   | -3272.41873  | 63.7 |
| 568 | 14v-02-BicapHexAnPr--fe2c4--378 | -3272.418704 | 63.7 |
| 569 | 14v-02-BicapHexAnPr--fe2c4--362 | -3272.418678 | 63.7 |
| 570 | 14v-02-BicapHexAnPr--fe2c4--344 | -3272.418659 | 63.7 |
| 571 | 14v-04-HepPr--fe2c4--1469       | -3272.418645 | 63.7 |
| 572 | 14v-02-BicapHexAnPr--fe2c4--704 | -3272.418574 | 63.8 |
| 573 | 14v-05-HepAnPr--fe2c4--1635     | -3272.418574 | 63.8 |
| 574 | 14v-06-OmnicapOh--fe2c4--1976   | -3272.418534 | 63.8 |
| 575 | 14v-01-OmnicapCube--fe2c4--114  | -3272.418451 | 63.9 |
| 576 | 14v-03-BicapHexPr--fe2c4--1069  | -3272.418415 | 63.9 |
| 577 | 14v-02-BicapHexAnPr--fe2c4--689 | -3272.418307 | 64.0 |
| 578 | 14v-05-HepAnPr--fe2c4--1829     | -3272.418184 | 64.0 |
| 579 | 14v-06-OmnicapOh--fe2c4--2019   | -3272.418121 | 64.1 |
| 580 | 14v-01-OmnicapCube--fe2c4--292  | -3272.418101 | 64.1 |
| 581 | 14v-06-OmnicapOh--fe2c4--2056   | -3272.418072 | 64.1 |
| 582 | 14v-05-HepAnPr--fe2c4--1799     | -3272.417939 | 64.2 |
| 583 | 14v-06-OmnicapOh--fe2c4--2276   | -3272.417904 | 64.2 |
| 584 | 14v-05-HepAnPr--fe2c4--1812     | -3272.417698 | 64.3 |
| 585 | 14v-03-BicapHexPr--fe2c4--811   | -3272.417533 | 64.4 |
| 586 | 14v-06-OmnicapOh--fe2c4--1924   | -3272.417494 | 64.5 |
| 587 | 14v-02-BicapHexAnPr--fe2c4--547 | -3272.417419 | 64.5 |
| 588 | 14v-06-OmnicapOh--fe2c4--1925   | -3272.417385 | 64.5 |
| 589 | 14v-02-BicapHexAnPr--fe2c4--539 | -3272.417229 | 64.6 |
| 590 | 14v-03-BicapHexPr--fe2c4--1068  | -3272.417216 | 64.6 |
| 591 | 14v-06-OmnicapOh--fe2c4--1958   | -3272.417197 | 64.7 |
| 592 | 14v-01-OmnicapCube--fe2c4--30   | -3272.417186 | 64.7 |
| 593 | 14v-03-BicapHexPr--fe2c4--872   | -3272.416947 | 64.8 |
| 594 | 14v-02-BicapHexAnPr--fe2c4--393 | -3272.416856 | 64.9 |
| 595 | 14v-03-BicapHexPr--fe2c4--983   | -3272.416775 | 64.9 |
| 596 | 14v-01-OmnicapCube--fe2c4--25   | -3272.416733 | 64.9 |
| 597 | 14v-03-BicapHexPr--fe2c4--1122  | -3272.416522 | 65.1 |
| 598 | 14v-03-BicapHexPr--fe2c4--1072  | -3272.416463 | 65.1 |
| 599 | 14v-04-HepPr--fe2c4--1414       | -3272.416333 | 65.2 |
| 600 | 14v-03-BicapHexPr--fe2c4--976   | -3272.416244 | 65.3 |
| 601 | 14v-02-BicapHexAnPr--fe2c4--564 | -3272.416227 | 65.3 |
| 602 | 14v-01-OmnicapCube--fe2c4--183  | -3272.416189 | 65.3 |
| 603 | 14v-02-BicapHexAnPr--fe2c4--742 | -3272.416165 | 65.3 |
| 604 | 14v-03-BicapHexPr--fe2c4--1247  | -3272.415911 | 65.5 |
| 605 | 14v-03-BicapHexPr--fe2c4--1136  | -3272.415905 | 65.5 |
| 606 | 14v-01-OmnicapCube--fe2c4--271  | -3272.415772 | 65.6 |
| 607 | 14v-01-OmnicapCube--fe2c4--308  | -3272.415703 | 65.6 |
| 608 | 14v-01-OmnicapCube--fe2c4--327  | -3272.415655 | 65.6 |
| 609 | 14v-01-OmnicapCube--fe2c4--312  | -3272.415635 | 65.6 |

|     |                               |                     |      |
|-----|-------------------------------|---------------------|------|
| 610 | 14v-01-OmnicapCube—fe2c4—331  | -3272.415582        | 65.7 |
| 611 | 14v-05-HepAnPr—fe2c4—1599     | -3272.415534        | 65.7 |
| 612 | 14v-06-OmnicapOh—fe2c4—2067   | -3272.415093        | 66.0 |
| 613 | 14v-02-BicapHexAnPr—fe2c4—675 | -3272.415025        | 66.0 |
| 614 | 14v-05-HepAnPr—fe2c4—1784     | -3272.414845        | 66.1 |
| 615 | 14v-02-BicapHexAnPr—fe2c4—649 | -3272.414802        | 66.2 |
| 616 | 14v-03-BicapHexPr—fe2c4—1060  | -3272.414781        | 66.2 |
| 617 | 14v-03-BicapHexPr—fe2c4—964   | -3272.414293        | 66.5 |
| 618 | 14v-02-BicapHexAnPr—fe2c4—701 | -3272.414283        | 66.5 |
| 619 | 14v-02-BicapHexAnPr—fe2c4—729 | -3272.414277        | 66.5 |
| 620 | 14v-03-BicapHexPr—fe2c4—975   | -3272.414256        | 66.5 |
| 621 | 14v-03-BicapHexPr—fe2c4—992   | -3272.414133        | 66.6 |
| 622 | 14v-06-OmnicapOh—fe2c4—2247   | -3272.414104        | 66.6 |
| 623 | 14v-06-OmnicapOh—fe2c4—2248   | -3272.414085        | 66.6 |
| 624 | 14v-03-BicapHexPr—fe2c4—1236  | -3272.414051        | 66.6 |
| 625 | 14v-02-BicapHexAnPr—fe2c4—730 | -3272.413922        | 66.7 |
| 626 | 14v-06-OmnicapOh—fe2c4—2075   | -3272.413866        | 66.7 |
| 627 | 14v-03-BicapHexPr—fe2c4—1177  | -3272.413567        | 66.9 |
| 628 | 14v-02-BicapHexAnPr—fe2c4—350 | -3272.413509        | 67.0 |
| 629 | 14v-05-HepAnPr—fe2c4—1806     | -3272.413338        | 67.1 |
| 630 | 14v-02-BicapHexAnPr—fe2c4—342 | -3272.413333        | 67.1 |
| 631 | 14v-02-BicapHexAnPr—fe2c4—731 | -3272.413307        | 67.1 |
| 632 | 14v-02-BicapHexAnPr—fe2c4—683 | -3272.413276        | 67.1 |
| 633 | 14v-03-BicapHexPr—fe2c4—1045  | -3272.413189        | 67.2 |
| 634 | 14v-03-BicapHexPr—fe2c4—917   | -3272.413185        | 67.2 |
| 635 | 14v-01-OmnicapCube—fe2c4—115  | -3272.413104        | 67.2 |
| 636 | 14v-01-OmnicapCube—fe2c4—39   | -3272.412952        | 67.3 |
| 637 | 14v-06-OmnicapOh—fe2c4—2259   | -3272.412922        | 67.3 |
| 638 | 14v-03-BicapHexPr—fe2c4—908   | -3272.412833        | 67.4 |
| 639 | 14v-05-HepAnPr—fe2c4—1869     | -3272.412701        | 67.5 |
| 640 | 14v-01-OmnicapCube—fe2c4—330  | -3272.4127          | 67.5 |
| 641 | 14v-01-OmnicapCube—fe2c4—334  | -3272.412693        | 67.5 |
| 642 | 14v-02-BicapHexAnPr—fe2c4—762 | -3272.412661        | 67.5 |
| 643 | 14v-01-OmnicapCube—fe2c4—101  | -3272.412654        | 67.5 |
| 644 | 14v-06-OmnicapOh—fe2c4—2092   | -3272.4125990000002 | 67.5 |
| 645 | 14v-01-OmnicapCube—fe2c4—147  | -3272.412461        | 67.6 |
| 646 | 14v-02-BicapHexAnPr—fe2c4—725 | -3272.41241         | 67.7 |
| 647 | 14v-03-BicapHexPr—fe2c4—1127  | -3272.412376        | 67.7 |
| 648 | 14v-06-OmnicapOh—fe2c4—2008   | -3272.412338        | 67.7 |
| 649 | 14v-02-BicapHexAnPr—fe2c4—380 | -3272.412315        | 67.7 |
| 650 | 14v-02-BicapHexAnPr—fe2c4—363 | -3272.412119        | 67.8 |
| 651 | 14v-03-BicapHexPr—fe2c4—1235  | -3272.412087        | 67.9 |
| 652 | 14v-03-BicapHexPr—fe2c4—877   | -3272.412087        | 67.9 |
| 653 | 14v-06-OmnicapOh—fe2c4—2110   | -3272.412082        | 67.9 |
| 654 | 14v-02-BicapHexAnPr—fe2c4—695 | -3272.412053        | 67.9 |
| 655 | 14v-01-OmnicapCube—fe2c4—305  | -3272.412042        | 67.9 |
| 656 | 14v-04-HepPr—fe2c4—1428       | -3272.411967        | 67.9 |
| 657 | 14v-01-OmnicapCube—fe2c4—290  | -3272.411929        | 68.0 |
| 658 | 14v-06-OmnicapOh—fe2c4—2039   | -3272.411883        | 68.0 |
| 659 | 14v-06-OmnicapOh—fe2c4—2109   | -3272.411831        | 68.0 |
| 660 | 14v-03-BicapHexPr—fe2c4—895   | -3272.411821        | 68.0 |

|     |                                 |              |      |
|-----|---------------------------------|--------------|------|
| 661 | 14v-03-BicapHexPr--fe2c4--803   | -3272.411793 | 68.0 |
| 662 | 14v-02-BicapHexAnPr--fe2c4--643 | -3272.411657 | 68.1 |
| 663 | 14v-06-OmnicapOh--fe2c4--1957   | -3272.41159  | 68.2 |
| 664 | 14v-03-BicapHexPr--fe2c4--967   | -3272.411539 | 68.2 |
| 665 | 14v-03-BicapHexPr--fe2c4--912   | -3272.411437 | 68.3 |
| 666 | 14v-06-OmnicapOh--fe2c4--1978   | -3272.411397 | 68.3 |
| 667 | 14v-04-HepPr--fe2c4--1477       | -3272.41122  | 68.4 |
| 668 | 14v-02-BicapHexAnPr--fe2c4--703 | -3272.411203 | 68.4 |
| 669 | 14v-01-OmnicapCube--fe2c4--171  | -3272.411196 | 68.4 |
| 670 | 14v-02-BicapHexAnPr--fe2c4--754 | -3272.411183 | 68.4 |
| 671 | 14v-04-HepPr--fe2c4--1549       | -3272.411177 | 68.4 |
| 672 | 14v-02-BicapHexAnPr--fe2c4--579 | -3272.41116  | 68.4 |
| 673 | 14v-03-BicapHexPr--fe2c4--784   | -3272.411128 | 68.5 |
| 674 | 14v-02-BicapHexAnPr--fe2c4--603 | -3272.411112 | 68.5 |
| 675 | 14v-06-OmnicapOh--fe2c4--1995   | -3272.410903 | 68.6 |
| 676 | 14v-03-BicapHexPr--fe2c4--1201  | -3272.410824 | 68.7 |
| 677 | 14v-03-BicapHexPr--fe2c4--1208  | -3272.410815 | 68.7 |
| 678 | 14v-01-OmnicapCube--fe2c4--325  | -3272.410653 | 68.8 |
| 679 | 14v-05-HepAnPr--fe2c4--1800     | -3272.410643 | 68.8 |
| 680 | 14v-02-BicapHexAnPr--fe2c4--674 | -3272.410599 | 68.8 |
| 681 | 14v-06-OmnicapOh--fe2c4--2156   | -3272.410563 | 68.8 |
| 682 | 14v-03-BicapHexPr--fe2c4--867   | -3272.410543 | 68.8 |
| 683 | 14v-03-BicapHexPr--fe2c4--1144  | -3272.410521 | 68.8 |
| 684 | 14v-03-BicapHexPr--fe2c4--787   | -3272.410454 | 68.9 |
| 685 | 14v-06-OmnicapOh--fe2c4--2206   | -3272.410453 | 68.9 |
| 686 | 14v-03-BicapHexPr--fe2c4--873   | -3272.410443 | 68.9 |
| 687 | 14v-06-OmnicapOh--fe2c4--2181   | -3272.410203 | 69.0 |
| 688 | 14v-06-OmnicapOh--fe2c4--2193   | -3272.410176 | 69.1 |
| 689 | 14v-06-OmnicapOh--fe2c4--2097   | -3272.410174 | 69.1 |
| 690 | 14v-04-HepPr--fe2c4--1544       | -3272.410067 | 69.1 |
| 691 | 14v-01-OmnicapCube--fe2c4--143  | -3272.409929 | 69.2 |
| 692 | 14v-05-HepAnPr--fe2c4--1811     | -3272.409779 | 69.3 |
| 693 | 14v-06-OmnicapOh--fe2c4--2026   | -3272.409732 | 69.3 |
| 694 | 14v-02-BicapHexAnPr--fe2c4--739 | -3272.409665 | 69.4 |
| 695 | 14v-02-BicapHexAnPr--fe2c4--390 | -3272.409647 | 69.4 |
| 696 | 14v-03-BicapHexPr--fe2c4--1166  | -3272.409537 | 69.5 |
| 697 | 14v-02-BicapHexAnPr--fe2c4--421 | -3272.409531 | 69.5 |
| 698 | 14v-06-OmnicapOh--fe2c4--2102   | -3272.409458 | 69.5 |
| 699 | 14v-02-BicapHexAnPr--fe2c4--587 | -3272.409414 | 69.5 |
| 700 | 14v-02-BicapHexAnPr--fe2c4--581 | -3272.409383 | 69.6 |
| 701 | 14v-03-BicapHexPr--fe2c4--812   | -3272.409321 | 69.6 |
| 702 | 14v-06-OmnicapOh--fe2c4--2236   | -3272.409275 | 69.6 |
| 703 | 14v-06-OmnicapOh--fe2c4--2135   | -3272.40925  | 69.6 |
| 704 | 14v-06-OmnicapOh--fe2c4--2221   | -3272.409156 | 69.7 |
| 705 | 14v-03-BicapHexPr--fe2c4--863   | -3272.409103 | 69.7 |
| 706 | 14v-03-BicapHexPr--fe2c4--1076  | -3272.408996 | 69.8 |
| 707 | 14v-03-BicapHexPr--fe2c4--1176  | -3272.408975 | 69.8 |
| 708 | 14v-05-HepAnPr--fe2c4--1858     | -3272.408962 | 69.8 |
| 709 | 14v-02-BicapHexAnPr--fe2c4--722 | -3272.408875 | 69.9 |
| 710 | 14v-06-OmnicapOh--fe2c4--2095   | -3272.408867 | 69.9 |
| 711 | 14v-02-BicapHexAnPr--fe2c4--733 | -3272.408708 | 70.0 |

|     |                                 |              |      |
|-----|---------------------------------|--------------|------|
| 712 | 14v-04-HepPr--fe2c4--1486       | -3272.408692 | 70.0 |
| 713 | 14v-02-BicapHexAnPr--fe2c4--595 | -3272.408643 | 70.0 |
| 714 | 14v-02-BicapHexAnPr--fe2c4--382 | -3272.408618 | 70.0 |
| 715 | 14v-04-HepPr--fe2c4--1340       | -3272.408576 | 70.1 |
| 716 | 14v-02-BicapHexAnPr--fe2c4--351 | -3272.408575 | 70.1 |
| 717 | 14v-02-BicapHexAnPr--fe2c4--544 | -3272.408551 | 70.1 |
| 718 | 14v-03-BicapHexPr--fe2c4--974   | -3272.408541 | 70.1 |
| 719 | 14v-02-BicapHexAnPr--fe2c4--542 | -3272.408502 | 70.1 |
| 720 | 14v-03-BicapHexPr--fe2c4--929   | -3272.408442 | 70.2 |
| 721 | 14v-03-BicapHexPr--fe2c4--861   | -3272.408304 | 70.2 |
| 722 | 14v-03-BicapHexPr--fe2c4--798   | -3272.408275 | 70.3 |
| 723 | 14v-01-OmnicapCube--fe2c4--180  | -3272.408221 | 70.3 |
| 724 | 14v-04-HepPr--fe2c4--1495       | -3272.408163 | 70.3 |
| 725 | 14v-03-BicapHexPr--fe2c4--978   | -3272.408085 | 70.4 |
| 726 | 14v-01-OmnicapCube--fe2c4--168  | -3272.407988 | 70.4 |
| 727 | 14v-03-BicapHexPr--fe2c4--774   | -3272.407975 | 70.4 |
| 728 | 14v-02-BicapHexAnPr--fe2c4--645 | -3272.407712 | 70.6 |
| 729 | 14v-06-OmnicapOh--fe2c4--2144   | -3272.407453 | 70.8 |
| 730 | 14v-03-BicapHexPr--fe2c4--822   | -3272.407444 | 70.8 |
| 731 | 14v-04-HepPr--fe2c4--1423       | -3272.407369 | 70.8 |
| 732 | 14v-03-BicapHexPr--fe2c4--1227  | -3272.407343 | 70.8 |
| 733 | 14v-06-OmnicapOh--fe2c4--1990   | -3272.407341 | 70.8 |
| 734 | 14v-03-BicapHexPr--fe2c4--903   | -3272.407258 | 70.9 |
| 735 | 14v-03-BicapHexPr--fe2c4--1224  | -3272.407252 | 70.9 |
| 736 | 14v-02-BicapHexAnPr--fe2c4--608 | -3272.4071   | 71.0 |
| 737 | 14v-03-BicapHexPr--fe2c4--986   | -3272.407054 | 71.0 |
| 738 | 14v-03-BicapHexPr--fe2c4--1107  | -3272.407023 | 71.0 |
| 739 | 14v-02-BicapHexAnPr--fe2c4--590 | -3272.407008 | 71.1 |
| 740 | 14v-03-BicapHexPr--fe2c4--1218  | -3272.406998 | 71.1 |
| 741 | 14v-03-BicapHexPr--fe2c4--996   | -3272.406994 | 71.1 |
| 742 | 14v-02-BicapHexAnPr--fe2c4--582 | -3272.40691  | 71.1 |
| 743 | 14v-03-BicapHexPr--fe2c4--1178  | -3272.406906 | 71.1 |
| 744 | 14v-01-OmnicapCube--fe2c4--208  | -3272.40664  | 71.3 |
| 745 | 14v-03-BicapHexPr--fe2c4--842   | -3272.406614 | 71.3 |
| 746 | 14v-01-OmnicapCube--fe2c4--145  | -3272.406609 | 71.3 |
| 747 | 14v-02-BicapHexAnPr--fe2c4--737 | -3272.406575 | 71.3 |
| 748 | 14v-06-OmnicapOh--fe2c4--2113   | -3272.406465 | 71.4 |
| 749 | 14v-02-BicapHexAnPr--fe2c4--339 | -3272.406383 | 71.4 |
| 750 | 14v-06-OmnicapOh--fe2c4--2289   | -3272.406272 | 71.5 |
| 751 | 14v-02-BicapHexAnPr--fe2c4--354 | -3272.406251 | 71.5 |
| 752 | 14v-02-BicapHexAnPr--fe2c4--577 | -3272.406201 | 71.6 |
| 753 | 14v-03-BicapHexPr--fe2c4--1180  | -3272.40605  | 71.7 |
| 754 | 14v-02-BicapHexAnPr--fe2c4--728 | -3272.40603  | 71.7 |
| 755 | 14v-02-BicapHexAnPr--fe2c4--372 | -3272.405986 | 71.7 |
| 756 | 14v-02-BicapHexAnPr--fe2c4--738 | -3272.405881 | 71.8 |
| 757 | 14v-03-BicapHexPr--fe2c4--973   | -3272.405869 | 71.8 |
| 758 | 14v-04-HepPr--fe2c4--1319       | -3272.40581  | 71.8 |
| 759 | 14v-01-OmnicapCube--fe2c4--190  | -3272.405759 | 71.8 |
| 760 | 14v-01-OmnicapCube--fe2c4--287  | -3272.405649 | 71.9 |
| 761 | 14v-03-BicapHexPr--fe2c4--995   | -3272.405635 | 71.9 |
| 762 | 14v-03-BicapHexPr--fe2c4--1011  | -3272.405331 | 72.1 |

|     |                                 |              |      |
|-----|---------------------------------|--------------|------|
| 763 | 14v-03-BicapHexPr--fe2c4--1117  | -3272.40531  | 72.1 |
| 764 | 14v-06-OmnicapOh--fe2c4--2038   | -3272.405307 | 72.1 |
| 765 | 14v-02-BicapHexAnPr--fe2c4--414 | -3272.405257 | 72.1 |
| 766 | 14v-01-OmnicapCube--fe2c4--155  | -3272.405203 | 72.2 |
| 767 | 14v-02-BicapHexAnPr--fe2c4--719 | -3272.405175 | 72.2 |
| 768 | 14v-03-BicapHexPr--fe2c4--1103  | -3272.405159 | 72.2 |
| 769 | 14v-03-BicapHexPr--fe2c4--845   | -3272.40515  | 72.2 |
| 770 | 14v-03-BicapHexPr--fe2c4--1237  | -3272.405117 | 72.2 |
| 771 | 14v-01-OmnicapCube--fe2c4--126  | -3272.405088 | 72.3 |
| 772 | 14v-03-BicapHexPr--fe2c4--1202  | -3272.405054 | 72.3 |
| 773 | 14v-06-OmnicapOh--fe2c4--2057   | -3272.405029 | 72.3 |
| 774 | 14v-06-OmnicapOh--fe2c4--2270   | -3272.405027 | 72.3 |
| 775 | 14v-03-BicapHexPr--fe2c4--1053  | -3272.404953 | 72.3 |
| 776 | 14v-04-HepPr--fe2c4--1456       | -3272.404836 | 72.4 |
| 777 | 14v-06-OmnicapOh--fe2c4--1940   | -3272.404735 | 72.5 |
| 778 | 14v-01-OmnicapCube--fe2c4--176  | -3272.40471  | 72.5 |
| 779 | 14v-06-OmnicapOh--fe2c4--2159   | -3272.404583 | 72.6 |
| 780 | 14v-02-BicapHexAnPr--fe2c4--584 | -3272.404474 | 72.6 |
| 781 | 14v-01-OmnicapCube--fe2c4--184  | -3272.404088 | 72.9 |
| 782 | 14v-02-BicapHexAnPr--fe2c4--357 | -3272.404078 | 72.9 |
| 783 | 14v-02-BicapHexAnPr--fe2c4--561 | -3272.404065 | 72.9 |
| 784 | 14v-06-OmnicapOh--fe2c4--2117   | -3272.404019 | 72.9 |
| 785 | 14v-06-OmnicapOh--fe2c4--1980   | -3272.40393  | 73.0 |
| 786 | 14v-01-OmnicapCube--fe2c4--36   | -3272.403899 | 73.0 |
| 787 | 14v-03-BicapHexPr--fe2c4--993   | -3272.403885 | 73.0 |
| 788 | 14v-03-BicapHexPr--fe2c4--778   | -3272.40385  | 73.0 |
| 789 | 14v-06-OmnicapOh--fe2c4--2002   | -3272.403715 | 73.1 |
| 790 | 14v-03-BicapHexPr--fe2c4--916   | -3272.403663 | 73.1 |
| 791 | 14v-01-OmnicapCube--fe2c4--160  | -3272.403639 | 73.2 |
| 792 | 14v-02-BicapHexAnPr--fe2c4--752 | -3272.403508 | 73.2 |
| 793 | 14v-06-OmnicapOh--fe2c4--2118   | -3272.403497 | 73.3 |
| 794 | 14v-03-BicapHexPr--fe2c4--952   | -3272.40341  | 73.3 |
| 795 | 14v-06-OmnicapOh--fe2c4--2099   | -3272.403403 | 73.3 |
| 796 | 14v-01-OmnicapCube--fe2c4--165  | -3272.4034   | 73.3 |
| 797 | 14v-03-BicapHexPr--fe2c4--777   | -3272.403344 | 73.3 |
| 798 | 14v-06-OmnicapOh--fe2c4--2010   | -3272.403296 | 73.4 |
| 799 | 14v-02-BicapHexAnPr--fe2c4--646 | -3272.403104 | 73.5 |
| 800 | 14v-02-BicapHexAnPr--fe2c4--529 | -3272.402971 | 73.6 |
| 801 | 14v-03-BicapHexPr--fe2c4--1163  | -3272.402841 | 73.7 |
| 802 | 14v-02-BicapHexAnPr--fe2c4--533 | -3272.402768 | 73.7 |
| 803 | 14v-01-OmnicapCube--fe2c4--167  | -3272.402767 | 73.7 |
| 804 | 14v-03-BicapHexPr--fe2c4--988   | -3272.402761 | 73.7 |
| 805 | 14v-06-OmnicapOh--fe2c4--2209   | -3272.402742 | 73.7 |
| 806 | 14v-02-BicapHexAnPr--fe2c4--391 | -3272.402716 | 73.7 |
| 807 | 14v-03-BicapHexPr--fe2c4--1026  | -3272.402705 | 73.8 |
| 808 | 14v-02-BicapHexAnPr--fe2c4--673 | -3272.402548 | 73.8 |
| 809 | 14v-01-OmnicapCube--fe2c4--221  | -3272.40251  | 73.9 |
| 810 | 14v-01-OmnicapCube--fe2c4--149  | -3272.402452 | 73.9 |
| 811 | 14v-02-BicapHexAnPr--fe2c4--760 | -3272.402424 | 73.9 |
| 812 | 14v-03-BicapHexPr--fe2c4--1175  | -3272.402423 | 73.9 |
| 813 | 14v-01-OmnicapCube--fe2c4--151  | -3272.402399 | 73.9 |

|     |                                 |              |      |
|-----|---------------------------------|--------------|------|
| 814 | 14v-02-BicapHexAnPr--fe2c4--589 | -3272.40237  | 74.0 |
| 815 | 14v-02-BicapHexAnPr--fe2c4--583 | -3272.402368 | 74.0 |
| 816 | 14v-02-BicapHexAnPr--fe2c4--713 | -3272.402348 | 74.0 |
| 817 | 14v-03-BicapHexPr--fe2c4--792   | -3272.402321 | 74.0 |
| 818 | 14v-03-BicapHexPr--fe2c4--1090  | -3272.402209 | 74.1 |
| 819 | 14v-03-BicapHexPr--fe2c4--909   | -3272.402176 | 74.1 |
| 820 | 14v-01-OmnicapCube--fe2c4--206  | -3272.402131 | 74.1 |
| 821 | 14v-03-BicapHexPr--fe2c4--1058  | -3272.401985 | 74.2 |
| 822 | 14v-03-BicapHexPr--fe2c4--847   | -3272.401928 | 74.2 |
| 823 | 14v-01-OmnicapCube--fe2c4--76   | -3272.401495 | 74.5 |
| 824 | 14v-05-HepAnPr--fe2c4--1665     | -3272.401476 | 74.5 |
| 825 | 14v-06-OmnicapOh--fe2c4--1988   | -3272.40145  | 74.5 |
| 826 | 14v-06-OmnicapOh--fe2c4--1929   | -3272.401329 | 74.6 |
| 827 | 14v-01-OmnicapCube--fe2c4--71   | -3272.401296 | 74.6 |
| 828 | 14v-01-OmnicapCube--fe2c4--321  | -3272.401267 | 74.7 |
| 829 | 14v-03-BicapHexPr--fe2c4--1043  | -3272.401223 | 74.7 |
| 830 | 14v-02-BicapHexAnPr--fe2c4--531 | -3272.401146 | 74.7 |
| 831 | 14v-05-HepAnPr--fe2c4--1822     | -3272.401125 | 74.7 |
| 832 | 14v-01-OmnicapCube--fe2c4--240  | -3272.401119 | 74.7 |
| 833 | 14v-03-BicapHexPr--fe2c4--770   | -3272.401097 | 74.8 |
| 834 | 14v-06-OmnicapOh--fe2c4--1947   | -3272.401085 | 74.8 |
| 835 | 14v-03-BicapHexPr--fe2c4--969   | -3272.401081 | 74.8 |
| 836 | 14v-01-OmnicapCube--fe2c4--222  | -3272.401069 | 74.8 |
| 837 | 14v-03-BicapHexPr--fe2c4--926   | -3272.401065 | 74.8 |
| 838 | 14v-06-OmnicapOh--fe2c4--2100   | -3272.40093  | 74.9 |
| 839 | 14v-06-OmnicapOh--fe2c4--1956   | -3272.400913 | 74.9 |
| 840 | 14v-04-HepPr--fe2c4--1250       | -3272.400908 | 74.9 |
| 841 | 14v-03-BicapHexPr--fe2c4--794   | -3272.400892 | 74.9 |
| 842 | 14v-03-BicapHexPr--fe2c4--1181  | -3272.400839 | 74.9 |
| 843 | 14v-04-HepPr--fe2c4--1449       | -3272.400812 | 74.9 |
| 844 | 14v-03-BicapHexPr--fe2c4--1016  | -3272.400764 | 75.0 |
| 845 | 14v-01-OmnicapCube--fe2c4--179  | -3272.400608 | 75.1 |
| 846 | 14v-03-BicapHexPr--fe2c4--837   | -3272.400602 | 75.1 |
| 847 | 14v-02-BicapHexAnPr--fe2c4--394 | -3272.400494 | 75.1 |
| 848 | 14v-02-BicapHexAnPr--fe2c4--570 | -3272.400478 | 75.1 |
| 849 | 14v-03-BicapHexPr--fe2c4--1031  | -3272.400477 | 75.1 |
| 850 | 14v-03-BicapHexPr--fe2c4--1110  | -3272.400421 | 75.2 |
| 851 | 14v-03-BicapHexPr--fe2c4--1204  | -3272.4004   | 75.2 |
| 852 | 14v-06-OmnicapOh--fe2c4--2263   | -3272.400382 | 75.2 |
| 853 | 14v-06-OmnicapOh--fe2c4--2205   | -3272.400256 | 75.3 |
| 854 | 14v-06-OmnicapOh--fe2c4--2147   | -3272.400143 | 75.4 |
| 855 | 14v-02-BicapHexAnPr--fe2c4--755 | -3272.400086 | 75.4 |
| 856 | 14v-02-BicapHexAnPr--fe2c4--635 | -3272.400032 | 75.4 |
| 857 | 14v-03-BicapHexPr--fe2c4--1145  | -3272.400032 | 75.4 |
| 858 | 14v-06-OmnicapOh--fe2c4--2292   | -3272.399934 | 75.5 |
| 859 | 14v-02-BicapHexAnPr--fe2c4--658 | -3272.399916 | 75.5 |
| 860 | 14v-06-OmnicapOh--fe2c4--2176   | -3272.399907 | 75.5 |
| 861 | 14v-02-BicapHexAnPr--fe2c4--586 | -3272.399896 | 75.5 |
| 862 | 14v-01-OmnicapCube--fe2c4--108  | -3272.399871 | 75.5 |
| 863 | 14v-02-BicapHexAnPr--fe2c4--655 | -3272.399858 | 75.5 |
| 864 | 14v-02-BicapHexAnPr--fe2c4--682 | -3272.399836 | 75.6 |



|     |                               |              |      |
|-----|-------------------------------|--------------|------|
| 865 | 14v-01-OmnicapCube—fe2c4—118  | -3272.399834 | 75.6 |
| 866 | 14v-02-BicapHexAnPr—fe2c4—668 | -3272.399814 | 75.6 |
| 867 | 14v-01-OmnicapCube—fe2c4—289  | -3272.399811 | 75.6 |
| 868 | 14v-04-HepPr—fe2c4—1478       | -3272.399757 | 75.6 |
| 869 | 14v-04-HepPr—fe2c4—1575       | -3272.399582 | 75.7 |
| 870 | 14v-03-BicapHexPr—fe2c4—796   | -3272.399328 | 75.9 |
| 871 | 14v-04-HepPr—fe2c4—1458       | -3272.39924  | 75.9 |
| 872 | 14v-01-OmnicapCube—fe2c4—197  | -3272.399227 | 75.9 |
| 873 | 14v-06-OmnicapOh—fe2c4—2300   | -3272.399218 | 75.9 |
| 874 | 14v-03-BicapHexPr—fe2c4—1030  | -3272.399197 | 76.0 |
| 875 | 14v-03-BicapHexPr—fe2c4—949   | -3272.399182 | 76.0 |
| 876 | 14v-03-BicapHexPr—fe2c4—1187  | -3272.399061 | 76.0 |
| 877 | 14v-02-BicapHexAnPr—fe2c4—681 | -3272.398993 | 76.1 |
| 878 | 14v-06-OmnicapOh—fe2c4—2096   | -3272.398895 | 76.1 |
| 879 | 14v-05-HepAnPr—fe2c4—1857     | -3272.398761 | 76.2 |
| 880 | 14v-02-BicapHexAnPr—fe2c4—552 | -3272.398725 | 76.2 |
| 881 | 14v-03-BicapHexPr—fe2c4—815   | -3272.398687 | 76.3 |
| 882 | 14v-02-BicapHexAnPr—fe2c4—384 | -3272.398666 | 76.3 |
| 883 | 14v-01-OmnicapCube—fe2c4—318  | -3272.398578 | 76.3 |
| 884 | 14v-06-OmnicapOh—fe2c4—2050   | -3272.398506 | 76.4 |
| 885 | 14v-02-BicapHexAnPr—fe2c4—566 | -3272.398483 | 76.4 |
| 886 | 14v-02-BicapHexAnPr—fe2c4—766 | -3272.398187 | 76.6 |
| 887 | 14v-03-BicapHexPr—fe2c4—805   | -3272.398112 | 76.6 |
| 888 | 14v-03-BicapHexPr—fe2c4—1228  | -3272.398072 | 76.7 |
| 889 | 14v-05-HepAnPr—fe2c4—1871     | -3272.397865 | 76.8 |
| 890 | 14v-03-BicapHexPr—fe2c4—1112  | -3272.397784 | 76.8 |
| 891 | 14v-02-BicapHexAnPr—fe2c4—612 | -3272.397676 | 76.9 |
| 892 | 14v-01-OmnicapCube—fe2c4—45   | -3272.397661 | 76.9 |
| 893 | 14v-03-BicapHexPr—fe2c4—1114  | -3272.397588 | 77.0 |
| 894 | 14v-05-HepAnPr—fe2c4—1711     | -3272.397457 | 77.0 |
| 895 | 14v-03-BicapHexPr—fe2c4—1141  | -3272.397379 | 77.1 |
| 896 | 14v-04-HepPr—fe2c4—1417       | -3272.397292 | 77.1 |
| 897 | 14v-03-BicapHexPr—fe2c4—899   | -3272.397268 | 77.2 |
| 898 | 14v-02-BicapHexAnPr—fe2c4—642 | -3272.397258 | 77.2 |
| 899 | 14v-01-OmnicapCube—fe2c4—16   | -3272.397247 | 77.2 |
| 900 | 14v-02-BicapHexAnPr—fe2c4—709 | -3272.397236 | 77.2 |
| 901 | 14v-03-BicapHexPr—fe2c4—882   | -3272.397191 | 77.2 |
| 902 | 14v-01-OmnicapCube—fe2c4—41   | -3272.397186 | 77.2 |
| 903 | 14v-02-BicapHexAnPr—fe2c4—614 | -3272.397054 | 77.3 |
| 904 | 14v-02-BicapHexAnPr—fe2c4—653 | -3272.396939 | 77.4 |
| 905 | 14v-01-OmnicapCube—fe2c4—83   | -3272.396917 | 77.4 |
| 906 | 14v-02-BicapHexAnPr—fe2c4—660 | -3272.396836 | 77.4 |
| 907 | 14v-03-BicapHexPr—fe2c4—1156  | -3272.396816 | 77.4 |
| 908 | 14v-03-BicapHexPr—fe2c4—1155  | -3272.396799 | 77.5 |
| 909 | 14v-03-BicapHexPr—fe2c4—970   | -3272.396781 | 77.5 |
| 910 | 14v-01-OmnicapCube—fe2c4—53   | -3272.396734 | 77.5 |
| 911 | 14v-03-BicapHexPr—fe2c4—1055  | -3272.396731 | 77.5 |
| 912 | 14v-01-OmnicapCube—fe2c4—182  | -3272.396646 | 77.6 |
| 913 | 14v-01-OmnicapCube—fe2c4—124  | -3272.39657  | 77.6 |
| 914 | 14v-03-BicapHexPr—fe2c4—816   | -3272.396542 | 77.6 |
| 915 | 14v-03-BicapHexPr—fe2c4—781   | -3272.396536 | 77.6 |

|     |                               |              |      |
|-----|-------------------------------|--------------|------|
| 916 | 14v-01-OmnicapCube—fe2c4—200  | -3272.396501 | 77.6 |
| 917 | 14v-03-BicapHexPr—fe2c4—1097  | -3272.396346 | 77.7 |
| 918 | 14v-03-BicapHexPr—fe2c4—829   | -3272.396166 | 77.9 |
| 919 | 14v-06-OmnicapOh—fe2c4—2152   | -3272.396126 | 77.9 |
| 920 | 14v-03-BicapHexPr—fe2c4—977   | -3272.395969 | 78.0 |
| 921 | 14v-01-OmnicapCube—fe2c4—15   | -3272.395829 | 78.1 |
| 922 | 14v-02-BicapHexAnPr—fe2c4—708 | -3272.395776 | 78.1 |
| 923 | 14v-01-OmnicapCube—fe2c4—4    | -3272.395763 | 78.1 |
| 924 | 14v-02-BicapHexAnPr—fe2c4—618 | -3272.395693 | 78.2 |
| 925 | 14v-03-BicapHexPr—fe2c4—898   | -3272.395683 | 78.2 |
| 926 | 14v-03-BicapHexPr—fe2c4—1051  | -3272.395681 | 78.2 |
| 927 | 14v-02-BicapHexAnPr—fe2c4—629 | -3272.395609 | 78.2 |
| 928 | 14v-03-BicapHexPr—fe2c4—885   | -3272.395582 | 78.2 |
| 929 | 14v-03-BicapHexPr—fe2c4—1142  | -3272.39552  | 78.3 |
| 930 | 14v-02-BicapHexAnPr—fe2c4—565 | -3272.395375 | 78.4 |
| 931 | 14v-02-BicapHexAnPr—fe2c4—594 | -3272.395211 | 78.5 |
| 932 | 14v-02-BicapHexAnPr—fe2c4—364 | -3272.395088 | 78.5 |
| 933 | 14v-06-OmnicapOh—fe2c4—2210   | -3272.395037 | 78.6 |
| 934 | 14v-04-HepPr—fe2c4—1261       | -3272.39496  | 78.6 |
| 935 | 14v-02-BicapHexAnPr—fe2c4—592 | -3272.394935 | 78.6 |
| 936 | 14v-05-HepAnPr—fe2c4—1824     | -3272.394916 | 78.6 |
| 937 | 14v-02-BicapHexAnPr—fe2c4—714 | -3272.394732 | 78.8 |
| 938 | 14v-05-HepAnPr—fe2c4—1815     | -3272.394669 | 78.8 |
| 939 | 14v-06-OmnicapOh—fe2c4—2131   | -3272.394456 | 78.9 |
| 940 | 14v-02-BicapHexAnPr—fe2c4—623 | -3272.394422 | 78.9 |
| 941 | 14v-03-BicapHexPr—fe2c4—1071  | -3272.39435  | 79.0 |
| 942 | 14v-03-BicapHexPr—fe2c4—1040  | -3272.394283 | 79.0 |
| 943 | 14v-03-BicapHexPr—fe2c4—1082  | -3272.394223 | 79.1 |
| 944 | 14v-01-OmnicapCube—fe2c4—218  | -3272.394216 | 79.1 |
| 945 | 14v-02-BicapHexAnPr—fe2c4—723 | -3272.394193 | 79.1 |
| 946 | 14v-02-BicapHexAnPr—fe2c4—726 | -3272.394187 | 79.1 |
| 947 | 14v-01-OmnicapCube—fe2c4—46   | -3272.394181 | 79.1 |
| 948 | 14v-06-OmnicapOh—fe2c4—2157   | -3272.394126 | 79.1 |
| 949 | 14v-03-BicapHexPr—fe2c4—1231  | -3272.394093 | 79.2 |
| 950 | 14v-01-OmnicapCube—fe2c4—198  | -3272.394082 | 79.2 |
| 951 | 14v-03-BicapHexPr—fe2c4—1027  | -3272.393987 | 79.2 |
| 952 | 14v-02-BicapHexAnPr—fe2c4—664 | -3272.393712 | 79.4 |
| 953 | 14v-01-OmnicapCube—fe2c4—27   | -3272.39361  | 79.5 |
| 954 | 14v-03-BicapHexPr—fe2c4—914   | -3272.393576 | 79.5 |
| 955 | 14v-03-BicapHexPr—fe2c4—919   | -3272.393543 | 79.5 |
| 956 | 14v-03-BicapHexPr—fe2c4—1124  | -3272.393529 | 79.5 |
| 957 | 14v-03-BicapHexPr—fe2c4—783   | -3272.393439 | 79.6 |
| 958 | 14v-06-OmnicapOh—fe2c4—2089   | -3272.393375 | 79.6 |
| 959 | 14v-05-HepAnPr—fe2c4—1762     | -3272.393346 | 79.6 |
| 960 | 14v-01-OmnicapCube—fe2c4—48   | -3272.393305 | 79.6 |
| 961 | 14v-01-OmnicapCube—fe2c4—42   | -3272.393236 | 79.7 |
| 962 | 14v-01-OmnicapCube—fe2c4—284  | -3272.393231 | 79.7 |
| 963 | 14v-03-BicapHexPr—fe2c4—1217  | -3272.393151 | 79.7 |
| 964 | 14v-01-OmnicapCube—fe2c4—166  | -3272.393131 | 79.8 |
| 965 | 14v-01-OmnicapCube—fe2c4—13   | -3272.393089 | 79.8 |
| 966 | 14v-02-BicapHexAnPr—fe2c4—748 | -3272.393061 | 79.8 |

|      |                               |              |      |
|------|-------------------------------|--------------|------|
| 967  | 14v-04-HepPr—fe2c4—1441       | -3272.392955 | 79.9 |
| 968  | 14v-03-BicapHexPr—fe2c4—801   | -3272.392926 | 79.9 |
| 969  | 14v-02-BicapHexAnPr—fe2c4—532 | -3272.39291  | 79.9 |
| 970  | 14v-06-OmnicapOh—fe2c4—1923   | -3272.392905 | 79.9 |
| 971  | 14v-02-BicapHexAnPr—fe2c4—680 | -3272.392861 | 79.9 |
| 972  | 14v-01-OmnicapCube—fe2c4—174  | -3272.392826 | 79.9 |
| 973  | 14v-02-BicapHexAnPr—fe2c4—734 | -3272.392822 | 80.0 |
| 974  | 14v-03-BicapHexPr—fe2c4—1184  | -3272.392813 | 80.0 |
| 975  | 14v-04-HepPr—fe2c4—1516       | -3272.392735 | 80.0 |
| 976  | 14v-02-BicapHexAnPr—fe2c4—545 | -3272.392666 | 80.1 |
| 977  | 14v-02-BicapHexAnPr—fe2c4—685 | -3272.392643 | 80.1 |
| 978  | 14v-06-OmnicapOh—fe2c4—2115   | -3272.392607 | 80.1 |
| 979  | 14v-03-BicapHexPr—fe2c4—935   | -3272.392578 | 80.1 |
| 980  | 14v-01-OmnicapCube—fe2c4—26   | -3272.392558 | 80.1 |
| 981  | 14v-02-BicapHexAnPr—fe2c4—609 | -3272.392556 | 80.1 |
| 982  | 14v-05-HepAnPr—fe2c4—1810     | -3272.392556 | 80.1 |
| 983  | 14v-02-BicapHexAnPr—fe2c4—602 | -3272.392528 | 80.1 |
| 984  | 14v-02-BicapHexAnPr—fe2c4—359 | -3272.3923   | 80.3 |
| 985  | 14v-02-BicapHexAnPr—fe2c4—615 | -3272.392228 | 80.3 |
| 986  | 14v-02-BicapHexAnPr—fe2c4—741 | -3272.392193 | 80.3 |
| 987  | 14v-01-OmnicapCube—fe2c4—255  | -3272.392051 | 80.4 |
| 988  | 14v-06-OmnicapOh—fe2c4—2219   | -3272.392022 | 80.5 |
| 989  | 14v-02-BicapHexAnPr—fe2c4—691 | -3272.391948 | 80.5 |
| 990  | 14v-01-OmnicapCube—fe2c4—158  | -3272.391828 | 80.6 |
| 991  | 14v-03-BicapHexPr—fe2c4—925   | -3272.391813 | 80.6 |
| 992  | 14v-06-OmnicapOh—fe2c4—2069   | -3272.391744 | 80.6 |
| 993  | 14v-06-OmnicapOh—fe2c4—2073   | -3272.39137  | 80.9 |
| 994  | 14v-03-BicapHexPr—fe2c4—1039  | -3272.391247 | 80.9 |
| 995  | 14v-01-OmnicapCube—fe2c4—260  | -3272.391246 | 80.9 |
| 996  | 14v-01-OmnicapCube—fe2c4—122  | -3272.391205 | 81.0 |
| 997  | 14v-02-BicapHexAnPr—fe2c4—744 | -3272.391037 | 81.1 |
| 998  | 14v-04-HepPr—fe2c4—1286       | -3272.39085  | 81.2 |
| 999  | 14v-06-OmnicapOh—fe2c4—1945   | -3272.390787 | 81.2 |
| 1000 | 14v-03-BicapHexPr—fe2c4—1007  | -3272.390746 | 81.3 |
| 1001 | 14v-06-OmnicapOh—fe2c4—2217   | -3272.390678 | 81.3 |
| 1002 | 14v-01-OmnicapCube—fe2c4—249  | -3272.390669 | 81.3 |
| 1003 | 14v-06-OmnicapOh—fe2c4—2239   | -3272.390661 | 81.3 |
| 1004 | 14v-01-OmnicapCube—fe2c4—137  | -3272.390647 | 81.3 |
| 1005 | 14v-01-OmnicapCube—fe2c4—99   | -3272.390637 | 81.3 |
| 1006 | 14v-01-OmnicapCube—fe2c4—228  | -3272.390598 | 81.3 |
| 1007 | 14v-03-BicapHexPr—fe2c4—920   | -3272.390573 | 81.4 |
| 1008 | 14v-03-BicapHexPr—fe2c4—994   | -3272.390562 | 81.4 |
| 1009 | 14v-03-BicapHexPr—fe2c4—893   | -3272.390557 | 81.4 |
| 1010 | 14v-02-BicapHexAnPr—fe2c4—624 | -3272.390548 | 81.4 |
| 1011 | 14v-03-BicapHexPr—fe2c4—782   | -3272.390035 | 81.7 |
| 1012 | 14v-06-OmnicapOh—fe2c4—1932   | -3272.389949 | 81.8 |
| 1013 | 14v-02-BicapHexAnPr—fe2c4—661 | -3272.389922 | 81.8 |
| 1014 | 14v-02-BicapHexAnPr—fe2c4—625 | -3272.389917 | 81.8 |
| 1015 | 14v-04-HepPr—fe2c4—1483       | -3272.389765 | 81.9 |
| 1016 | 14v-03-BicapHexPr—fe2c4—934   | -3272.389755 | 81.9 |
| 1017 | 14v-03-BicapHexPr—fe2c4—1042  | -3272.389678 | 81.9 |

|      |                               |              |      |
|------|-------------------------------|--------------|------|
| 1018 | 14v-02-BicapHexAnPr—fe2c4—360 | -3272.389645 | 81.9 |
| 1019 | 14v-02-BicapHexAnPr—fe2c4—648 | -3272.389561 | 82.0 |
| 1020 | 14v-06-OmnicapOh—fe2c4—2204   | -3272.389555 | 82.0 |
| 1021 | 14v-06-OmnicapOh—fe2c4—2232   | -3272.389448 | 82.1 |
| 1022 | 14v-03-BicapHexPr—fe2c4—1062  | -3272.389436 | 82.1 |
| 1023 | 14v-02-BicapHexAnPr—fe2c4—356 | -3272.38907  | 82.3 |
| 1024 | 14v-03-BicapHexPr—fe2c4—800   | -3272.389062 | 82.3 |
| 1025 | 14v-03-BicapHexPr—fe2c4—1041  | -3272.389043 | 82.3 |
| 1026 | 14v-02-BicapHexAnPr—fe2c4—375 | -3272.388984 | 82.4 |
| 1027 | 14v-02-BicapHexAnPr—fe2c4—750 | -3272.388982 | 82.4 |
| 1028 | 14v-01-OmnicapCube—fe2c4—70   | -3272.388881 | 82.4 |
| 1029 | 14v-06-OmnicapOh—fe2c4—2288   | -3272.388695 | 82.5 |
| 1030 | 14v-02-BicapHexAnPr—fe2c4—676 | -3272.388681 | 82.6 |
| 1031 | 14v-02-BicapHexAnPr—fe2c4—348 | -3272.388529 | 82.6 |
| 1032 | 14v-01-OmnicapCube—fe2c4—204  | -3272.388444 | 82.7 |
| 1033 | 14v-01-OmnicapCube—fe2c4—238  | -3272.388333 | 82.8 |
| 1034 | 14v-01-OmnicapCube—fe2c4—324  | -3272.388306 | 82.8 |
| 1035 | 14v-06-OmnicapOh—fe2c4—2106   | -3272.388291 | 82.8 |
| 1036 | 14v-04-HepPr—fe2c4—1293       | -3272.38821  | 82.8 |
| 1037 | 14v-06-OmnicapOh—fe2c4—2103   | -3272.388073 | 82.9 |
| 1038 | 14v-04-HepPr—fe2c4—1522       | -3272.387877 | 83.1 |
| 1039 | 14v-06-OmnicapOh—fe2c4—1962   | -3272.387798 | 83.1 |
| 1040 | 14v-06-OmnicapOh—fe2c4—1998   | -3272.387445 | 83.3 |
| 1041 | 14v-01-OmnicapCube—fe2c4—214  | -3272.387334 | 83.4 |
| 1042 | 14v-01-OmnicapCube—fe2c4—29   | -3272.387314 | 83.4 |
| 1043 | 14v-01-OmnicapCube—fe2c4—278  | -3272.387289 | 83.4 |
| 1044 | 14v-01-OmnicapCube—fe2c4—210  | -3272.387225 | 83.5 |
| 1045 | 14v-03-BicapHexPr—fe2c4—1023  | -3272.387116 | 83.5 |
| 1046 | 14v-06-OmnicapOh—fe2c4—2198   | -3272.387086 | 83.6 |
| 1047 | 14v-03-BicapHexPr—fe2c4—779   | -3272.386962 | 83.6 |
| 1048 | 14v-03-BicapHexPr—fe2c4—990   | -3272.386948 | 83.6 |
| 1049 | 14v-02-BicapHexAnPr—fe2c4—423 | -3272.386907 | 83.7 |
| 1050 | 14v-06-OmnicapOh—fe2c4—2190   | -3272.386848 | 83.7 |
| 1051 | 14v-03-BicapHexPr—fe2c4—1020  | -3272.386743 | 83.8 |
| 1052 | 14v-06-OmnicapOh—fe2c4—2281   | -3272.386727 | 83.8 |
| 1053 | 14v-03-BicapHexPr—fe2c4—797   | -3272.386701 | 83.8 |
| 1054 | 14v-03-BicapHexPr—fe2c4—1215  | -3272.386602 | 83.9 |
| 1055 | 14v-02-BicapHexAnPr—fe2c4—632 | -3272.386431 | 84.0 |
| 1056 | 14v-03-BicapHexPr—fe2c4—1223  | -3272.386406 | 84.0 |
| 1057 | 14v-02-BicapHexAnPr—fe2c4—670 | -3272.386366 | 84.0 |
| 1058 | 14v-01-OmnicapCube—fe2c4—193  | -3272.38635  | 84.0 |
| 1059 | 14v-03-BicapHexPr—fe2c4—1242  | -3272.386348 | 84.0 |
| 1060 | 14v-03-BicapHexPr—fe2c4—957   | -3272.386094 | 84.2 |
| 1061 | 14v-03-BicapHexPr—fe2c4—945   | -3272.386012 | 84.2 |
| 1062 | 14v-06-OmnicapOh—fe2c4—2235   | -3272.385862 | 84.3 |
| 1063 | 14v-05-HepAnPr—fe2c4—1786     | -3272.385833 | 84.3 |
| 1064 | 14v-05-HepAnPr—fe2c4—1705     | -3272.385823 | 84.3 |
| 1065 | 14v-01-OmnicapCube—fe2c4—189  | -3272.385682 | 84.4 |
| 1066 | 14v-06-OmnicapOh—fe2c4—2253   | -3272.385581 | 84.5 |
| 1067 | 14v-02-BicapHexAnPr—fe2c4—580 | -3272.385486 | 84.6 |
| 1068 | 14v-02-BicapHexAnPr—fe2c4—381 | -3272.385342 | 84.6 |

|      |                                 |              |      |
|------|---------------------------------|--------------|------|
| 1069 | 14v-03-BicapHexPr--fe2c4--1088  | -3272.385303 | 84.7 |
| 1070 | 14v-01-OmnicapCube--fe2c4--2    | -3272.385253 | 84.7 |
| 1071 | 14v-04-HepPr--fe2c4--1416       | -3272.385234 | 84.7 |
| 1072 | 14v-06-OmnicapOh--fe2c4--2087   | -3272.385013 | 84.9 |
| 1073 | 14v-02-BicapHexAnPr--fe2c4--633 | -3272.384862 | 84.9 |
| 1074 | 14v-03-BicapHexPr--fe2c4--1138  | -3272.384861 | 84.9 |
| 1075 | 14v-02-BicapHexAnPr--fe2c4--697 | -3272.38485  | 85.0 |
| 1076 | 14v-03-BicapHexPr--fe2c4--1135  | -3272.384784 | 85.0 |
| 1077 | 14v-06-OmnicapOh--fe2c4--2294   | -3272.384651 | 85.1 |
| 1078 | 14v-04-HepPr--fe2c4--1398       | -3272.384628 | 85.1 |
| 1079 | 14v-02-BicapHexAnPr--fe2c4--553 | -3272.384586 | 85.1 |
| 1080 | 14v-03-BicapHexPr--fe2c4--1061  | -3272.384576 | 85.1 |
| 1081 | 14v-02-BicapHexAnPr--fe2c4--575 | -3272.384572 | 85.1 |
| 1082 | 14v-03-BicapHexPr--fe2c4--1123  | -3272.384364 | 85.3 |
| 1083 | 14v-06-OmnicapOh--fe2c4--1996   | -3272.384321 | 85.3 |
| 1084 | 14v-02-BicapHexAnPr--fe2c4--637 | -3272.384314 | 85.3 |
| 1085 | 14v-06-OmnicapOh--fe2c4--2054   | -3272.384274 | 85.3 |
| 1086 | 14v-03-BicapHexPr--fe2c4--1233  | -3272.384263 | 85.3 |
| 1087 | 14v-06-OmnicapOh--fe2c4--1927   | -3272.384256 | 85.3 |
| 1088 | 14v-03-BicapHexPr--fe2c4--1131  | -3272.384249 | 85.3 |
| 1089 | 14v-03-BicapHexPr--fe2c4--982   | -3272.384244 | 85.3 |
| 1090 | 14v-02-BicapHexAnPr--fe2c4--705 | -3272.384242 | 85.3 |
| 1091 | 14v-03-BicapHexPr--fe2c4--1106  | -3272.384166 | 85.4 |
| 1092 | 14v-01-OmnicapCube--fe2c4--162  | -3272.384034 | 85.5 |
| 1093 | 14v-02-BicapHexAnPr--fe2c4--567 | -3272.383943 | 85.5 |
| 1094 | 14v-01-OmnicapCube--fe2c4--31   | -3272.383845 | 85.6 |
| 1095 | 14v-02-BicapHexAnPr--fe2c4--761 | -3272.383832 | 85.6 |
| 1096 | 14v-01-OmnicapCube--fe2c4--1    | -3272.383829 | 85.6 |
| 1097 | 14v-02-BicapHexAnPr--fe2c4--574 | -3272.383793 | 85.6 |
| 1098 | 14v-06-OmnicapOh--fe2c4--1944   | -3272.383727 | 85.7 |
| 1099 | 14v-03-BicapHexPr--fe2c4--775   | -3272.383718 | 85.7 |
| 1100 | 14v-04-HepPr--fe2c4--1519       | -3272.383707 | 85.7 |
| 1101 | 14v-03-BicapHexPr--fe2c4--948   | -3272.383651 | 85.7 |
| 1102 | 14v-02-BicapHexAnPr--fe2c4--486 | -3272.383595 | 85.7 |
| 1103 | 14v-05-HepAnPr--fe2c4--1834     | -3272.383505 | 85.8 |
| 1104 | 14v-01-OmnicapCube--fe2c4--19   | -3272.383502 | 85.8 |
| 1105 | 14v-06-OmnicapOh--fe2c4--2070   | -3272.383396 | 85.9 |
| 1106 | 14v-05-HepAnPr--fe2c4--1770     | -3272.383355 | 85.9 |
| 1107 | 14v-01-OmnicapCube--fe2c4--181  | -3272.383347 | 85.9 |
| 1108 | 14v-04-HepPr--fe2c4--1406       | -3272.383334 | 85.9 |
| 1109 | 14v-03-BicapHexPr--fe2c4--1066  | -3272.383235 | 86.0 |
| 1110 | 14v-03-BicapHexPr--fe2c4--1067  | -3272.383158 | 86.0 |
| 1111 | 14v-02-BicapHexAnPr--fe2c4--377 | -3272.383133 | 86.0 |
| 1112 | 14v-03-BicapHexPr--fe2c4--1246  | -3272.38311  | 86.0 |
| 1113 | 14v-06-OmnicapOh--fe2c4--2015   | -3272.383042 | 86.1 |
| 1114 | 14v-06-OmnicapOh--fe2c4--2058   | -3272.383039 | 86.1 |
| 1115 | 14v-02-BicapHexAnPr--fe2c4--745 | -3272.382984 | 86.1 |
| 1116 | 14v-04-HepPr--fe2c4--1555       | -3272.382906 | 86.2 |
| 1117 | 14v-06-OmnicapOh--fe2c4--2035   | -3272.382889 | 86.2 |
| 1118 | 14v-03-BicapHexPr--fe2c4--846   | -3272.382835 | 86.2 |
| 1119 | 14v-04-HepPr--fe2c4--1265       | -3272.382773 | 86.3 |

|      |                               |              |      |
|------|-------------------------------|--------------|------|
| 1120 | 14v-06-OmnicapOh—fe2c4—2029   | -3272.382772 | 86.3 |
| 1121 | 14v-05-HepAnPr—fe2c4—1823     | -3272.382723 | 86.3 |
| 1122 | 14v-02-BicapHexAnPr—fe2c4—559 | -3272.382669 | 86.3 |
| 1123 | 14v-02-BicapHexAnPr—fe2c4—549 | -3272.382604 | 86.4 |
| 1124 | 14v-01-OmnicapCube—fe2c4—24   | -3272.382595 | 86.4 |
| 1125 | 14v-01-OmnicapCube—fe2c4—215  | -3272.382559 | 86.4 |
| 1126 | 14v-06-OmnicapOh—fe2c4—1933   | -3272.382521 | 86.4 |
| 1127 | 14v-05-HepAnPr—fe2c4—1897     | -3272.382499 | 86.4 |
| 1128 | 14v-01-OmnicapCube—fe2c4—153  | -3272.382456 | 86.5 |
| 1129 | 14v-03-BicapHexPr—fe2c4—810   | -3272.382393 | 86.5 |
| 1130 | 14v-01-OmnicapCube—fe2c4—233  | -3272.382372 | 86.5 |
| 1131 | 14v-01-OmnicapCube—fe2c4—247  | -3272.382095 | 86.7 |
| 1132 | 14v-04-HepPr—fe2c4—1408       | -3272.382071 | 86.7 |
| 1133 | 14v-02-BicapHexAnPr—fe2c4—349 | -3272.382061 | 86.7 |
| 1134 | 14v-02-BicapHexAnPr—fe2c4—361 | -3272.381909 | 86.8 |
| 1135 | 14v-03-BicapHexPr—fe2c4—981   | -3272.3819   | 86.8 |
| 1136 | 14v-06-OmnicapOh—fe2c4—2268   | -3272.381809 | 86.9 |
| 1137 | 14v-01-OmnicapCube—fe2c4—277  | -3272.381736 | 86.9 |
| 1138 | 14v-01-OmnicapCube—fe2c4—223  | -3272.381694 | 86.9 |
| 1139 | 14v-04-HepPr—fe2c4—1427       | -3272.38156  | 87.0 |
| 1140 | 14v-03-BicapHexPr—fe2c4—1035  | -3272.381547 | 87.0 |
| 1141 | 14v-05-HepAnPr—fe2c4—1782     | -3272.381342 | 87.2 |
| 1142 | 14v-06-OmnicapOh—fe2c4—2234   | -3272.381281 | 87.2 |
| 1143 | 14v-03-BicapHexPr—fe2c4—1028  | -3272.381189 | 87.3 |
| 1144 | 14v-02-BicapHexAnPr—fe2c4—358 | -3272.381099 | 87.3 |
| 1145 | 14v-05-HepAnPr—fe2c4—1738     | -3272.381061 | 87.3 |
| 1146 | 14v-05-HepAnPr—fe2c4—1817     | -3272.381047 | 87.3 |
| 1147 | 14v-02-BicapHexAnPr—fe2c4—492 | -3272.380832 | 87.5 |
| 1148 | 14v-04-HepPr—fe2c4—1497       | -3272.380777 | 87.5 |
| 1149 | 14v-02-BicapHexAnPr—fe2c4—488 | -3272.380572 | 87.6 |
| 1150 | 14v-03-BicapHexPr—fe2c4—950   | -3272.380526 | 87.7 |
| 1151 | 14v-06-OmnicapOh—fe2c4—1997   | -3272.380373 | 87.8 |
| 1152 | 14v-04-HepPr—fe2c4—1445       | -3272.380308 | 87.8 |
| 1153 | 14v-05-HepAnPr—fe2c4—1757     | -3272.380206 | 87.9 |
| 1154 | 14v-01-OmnicapCube—fe2c4—6    | -3272.380178 | 87.9 |
| 1155 | 14v-02-BicapHexAnPr—fe2c4—417 | -3272.380045 | 88.0 |
| 1156 | 14v-01-OmnicapCube—fe2c4—10   | -3272.379973 | 88.0 |
| 1157 | 14v-02-BicapHexAnPr—fe2c4—530 | -3272.379922 | 88.0 |
| 1158 | 14v-05-HepAnPr—fe2c4—1808     | -3272.379906 | 88.1 |
| 1159 | 14v-03-BicapHexPr—fe2c4—941   | -3272.379869 | 88.1 |
| 1160 | 14v-02-BicapHexAnPr—fe2c4—543 | -3272.379843 | 88.1 |
| 1161 | 14v-01-OmnicapCube—fe2c4—12   | -3272.379834 | 88.1 |
| 1162 | 14v-06-OmnicapOh—fe2c4—1921   | -3272.379778 | 88.1 |
| 1163 | 14v-04-HepPr—fe2c4—1444       | -3272.37976  | 88.1 |
| 1164 | 14v-01-OmnicapCube—fe2c4—209  | -3272.379747 | 88.2 |
| 1165 | 14v-06-OmnicapOh—fe2c4—2041   | -3272.379734 | 88.2 |
| 1166 | 14v-01-OmnicapCube—fe2c4—34   | -3272.379691 | 88.2 |
| 1167 | 14v-06-OmnicapOh—fe2c4—2085   | -3272.379653 | 88.2 |
| 1168 | 14v-05-HepAnPr—fe2c4—1791     | -3272.379535 | 88.3 |
| 1169 | 14v-02-BicapHexAnPr—fe2c4—721 | -3272.379447 | 88.3 |
| 1170 | 14v-02-BicapHexAnPr—fe2c4—352 | -3272.379421 | 88.4 |

|      |                               |              |      |
|------|-------------------------------|--------------|------|
| 1171 | 14v-02-BicapHexAnPr—fe2c4—353 | -3272.379315 | 88.4 |
| 1172 | 14v-01-OmnicapCube—fe2c4—256  | -3272.37919  | 88.5 |
| 1173 | 14v-06-OmnicapOh—fe2c4—2167   | -3272.379129 | 88.5 |
| 1174 | 14v-04-HepPr—fe2c4—1570       | -3272.378926 | 88.7 |
| 1175 | 14v-03-BicapHexPr—fe2c4—1005  | -3272.378907 | 88.7 |
| 1176 | 14v-02-BicapHexAnPr—fe2c4—718 | -3272.378867 | 88.7 |
| 1177 | 14v-06-OmnicapOh—fe2c4—2121   | -3272.378864 | 88.7 |
| 1178 | 14v-05-HepAnPr—fe2c4—1783     | -3272.378848 | 88.7 |
| 1179 | 14v-04-HepPr—fe2c4—1295       | -3272.378747 | 88.8 |
| 1180 | 14v-03-BicapHexPr—fe2c4—962   | -3272.378711 | 88.8 |
| 1181 | 14v-04-HepPr—fe2c4—1383       | -3272.378441 | 89.0 |
| 1182 | 14v-03-BicapHexPr—fe2c4—921   | -3272.378428 | 89.0 |
| 1183 | 14v-01-OmnicapCube—fe2c4—243  | -3272.378352 | 89.0 |
| 1184 | 14v-05-HepAnPr—fe2c4—1626     | -3272.378317 | 89.1 |
| 1185 | 14v-03-BicapHexPr—fe2c4—871   | -3272.378262 | 89.1 |
| 1186 | 14v-03-BicapHexPr—fe2c4—865   | -3272.378261 | 89.1 |
| 1187 | 14v-06-OmnicapOh—fe2c4—2046   | -3272.37822  | 89.1 |
| 1188 | 14v-03-BicapHexPr—fe2c4—1080  | -3272.378145 | 89.2 |
| 1189 | 14v-02-BicapHexAnPr—fe2c4—368 | -3272.378134 | 89.2 |
| 1190 | 14v-03-BicapHexPr—fe2c4—1214  | -3272.378089 | 89.2 |
| 1191 | 14v-05-HepAnPr—fe2c4—1792     | -3272.378047 | 89.2 |
| 1192 | 14v-06-OmnicapOh—fe2c4—2032   | -3272.378012 | 89.2 |
| 1193 | 14v-06-OmnicapOh—fe2c4—1950   | -3272.378008 | 89.2 |
| 1194 | 14v-03-BicapHexPr—fe2c4—808   | -3272.377979 | 89.3 |
| 1195 | 14v-02-BicapHexAnPr—fe2c4—717 | -3272.377961 | 89.3 |
| 1196 | 14v-05-HepAnPr—fe2c4—1816     | -3272.377858 | 89.3 |
| 1197 | 14v-04-HepPr—fe2c4—1298       | -3272.37784  | 89.4 |
| 1198 | 14v-05-HepAnPr—fe2c4—1650     | -3272.377744 | 89.4 |
| 1199 | 14v-06-OmnicapOh—fe2c4—2275   | -3272.377672 | 89.5 |
| 1200 | 14v-02-BicapHexAnPr—fe2c4—667 | -3272.377647 | 89.5 |
| 1201 | 14v-01-OmnicapCube—fe2c4—234  | -3272.377628 | 89.5 |
| 1202 | 14v-02-BicapHexAnPr—fe2c4—757 | -3272.377627 | 89.5 |
| 1203 | 14v-01-OmnicapCube—fe2c4—213  | -3272.377622 | 89.5 |
| 1204 | 14v-06-OmnicapOh—fe2c4—1922   | -3272.377601 | 89.5 |
| 1205 | 14v-01-OmnicapCube—fe2c4—89   | -3272.377595 | 89.5 |
| 1206 | 14v-02-BicapHexAnPr—fe2c4—699 | -3272.377493 | 89.6 |
| 1207 | 14v-06-OmnicapOh—fe2c4—1926   | -3272.37749  | 89.6 |
| 1208 | 14v-01-OmnicapCube—fe2c4—77   | -3272.377421 | 89.6 |
| 1209 | 14v-06-OmnicapOh—fe2c4—2174   | -3272.377235 | 89.7 |
| 1210 | 14v-02-BicapHexAnPr—fe2c4—523 | -3272.377172 | 89.8 |
| 1211 | 14v-06-OmnicapOh—fe2c4—2161   | -3272.377147 | 89.8 |
| 1212 | 14v-05-HepAnPr—fe2c4—1877     | -3272.376976 | 89.9 |
| 1213 | 14v-02-BicapHexAnPr—fe2c4—591 | -3272.376942 | 89.9 |
| 1214 | 14v-03-BicapHexPr—fe2c4—1230  | -3272.376859 | 90.0 |
| 1215 | 14v-06-OmnicapOh—fe2c4—2124   | -3272.376834 | 90.0 |
| 1216 | 14v-04-HepPr—fe2c4—1580       | -3272.37674  | 90.0 |
| 1217 | 14v-02-BicapHexAnPr—fe2c4—596 | -3272.37671  | 90.1 |
| 1218 | 14v-02-BicapHexAnPr—fe2c4—511 | -3272.376683 | 90.1 |
| 1219 | 14v-02-BicapHexAnPr—fe2c4—732 | -3272.376683 | 90.1 |
| 1220 | 14v-03-BicapHexPr—fe2c4—769   | -3272.376658 | 90.1 |
| 1221 | 14v-06-OmnicapOh—fe2c4—2134   | -3272.376633 | 90.1 |

|      |                               |              |      |
|------|-------------------------------|--------------|------|
| 1222 | 14v-01-OmnicapCube—fe2c4—169  | -3272.376582 | 90.1 |
| 1223 | 14v-02-BicapHexAnPr—fe2c4—634 | -3272.376515 | 90.2 |
| 1224 | 14v-06-OmnicapOh—fe2c4—1959   | -3272.376383 | 90.3 |
| 1225 | 14v-02-BicapHexAnPr—fe2c4—702 | -3272.376361 | 90.3 |
| 1226 | 14v-01-OmnicapCube—fe2c4—86   | -3272.376337 | 90.3 |
| 1227 | 14v-03-BicapHexPr—fe2c4—1033  | -3272.376327 | 90.3 |
| 1228 | 14v-01-OmnicapCube—fe2c4—11   | -3272.376299 | 90.3 |
| 1229 | 14v-04-HepPr—fe2c4—1529       | -3272.376289 | 90.3 |
| 1230 | 14v-02-BicapHexAnPr—fe2c4—641 | -3272.376003 | 90.5 |
| 1231 | 14v-03-BicapHexPr—fe2c4—1073  | -3272.375857 | 90.6 |
| 1232 | 14v-06-OmnicapOh—fe2c4—2158   | -3272.375636 | 90.7 |
| 1233 | 14v-06-OmnicapOh—fe2c4—1960   | -3272.375609 | 90.8 |
| 1234 | 14v-01-OmnicapCube—fe2c4—326  | -3272.375144 | 91.0 |
| 1235 | 14v-03-BicapHexPr—fe2c4—874   | -3272.374948 | 91.2 |
| 1236 | 14v-02-BicapHexAnPr—fe2c4—383 | -3272.374814 | 91.3 |
| 1237 | 14v-06-OmnicapOh—fe2c4—1952   | -3272.374802 | 91.3 |
| 1238 | 14v-06-OmnicapOh—fe2c4—2208   | -3272.374801 | 91.3 |
| 1239 | 14v-03-BicapHexPr—fe2c4—1022  | -3272.374766 | 91.3 |
| 1240 | 14v-03-BicapHexPr—fe2c4—1108  | -3272.374429 | 91.5 |
| 1241 | 14v-06-OmnicapOh—fe2c4—2071   | -3272.374424 | 91.5 |
| 1242 | 14v-03-BicapHexPr—fe2c4—791   | -3272.374358 | 91.5 |
| 1243 | 14v-03-BicapHexPr—fe2c4—1126  | -3272.374305 | 91.6 |
| 1244 | 14v-05-HepAnPr—fe2c4—1722     | -3272.374144 | 91.7 |
| 1245 | 14v-03-BicapHexPr—fe2c4—1065  | -3272.374107 | 91.7 |
| 1246 | 14v-06-OmnicapOh—fe2c4—2216   | -3272.374081 | 91.7 |
| 1247 | 14v-03-BicapHexPr—fe2c4—773   | -3272.374051 | 91.7 |
| 1248 | 14v-01-OmnicapCube—fe2c4—242  | -3272.374025 | 91.7 |
| 1249 | 14v-04-HepPr—fe2c4—1437       | -3272.373937 | 91.8 |
| 1250 | 14v-01-OmnicapCube—fe2c4—17   | -3272.373927 | 91.8 |
| 1251 | 14v-01-OmnicapCube—fe2c4—245  | -3272.373923 | 91.8 |
| 1252 | 14v-05-HepAnPr—fe2c4—1790     | -3272.373831 | 91.9 |
| 1253 | 14v-03-BicapHexPr—fe2c4—1119  | -3272.373686 | 92.0 |
| 1254 | 14v-01-OmnicapCube—fe2c4—161  | -3272.3736   | 92.0 |
| 1255 | 14v-06-OmnicapOh—fe2c4—2122   | -3272.373542 | 92.1 |
| 1256 | 14v-02-BicapHexAnPr—fe2c4—424 | -3272.373531 | 92.1 |
| 1257 | 14v-03-BicapHexPr—fe2c4—1091  | -3272.373507 | 92.1 |
| 1258 | 14v-02-BicapHexAnPr—fe2c4—647 | -3272.373491 | 92.1 |
| 1259 | 14v-05-HepAnPr—fe2c4—1772     | -3272.373235 | 92.2 |
| 1260 | 14v-05-HepAnPr—fe2c4—1802     | -3272.373188 | 92.3 |
| 1261 | 14v-03-BicapHexPr—fe2c4—1094  | -3272.37316  | 92.3 |
| 1262 | 14v-02-BicapHexAnPr—fe2c4—735 | -3272.373023 | 92.4 |
| 1263 | 14v-04-HepPr—fe2c4—1447       | -3272.373002 | 92.4 |
| 1264 | 14v-01-OmnicapCube—fe2c4—274  | -3272.372975 | 92.4 |
| 1265 | 14v-05-HepAnPr—fe2c4—1832     | -3272.372936 | 92.4 |
| 1266 | 14v-03-BicapHexPr—fe2c4—814   | -3272.372889 | 92.5 |
| 1267 | 14v-02-BicapHexAnPr—fe2c4—644 | -3272.372846 | 92.5 |
| 1268 | 14v-03-BicapHexPr—fe2c4—1063  | -3272.372808 | 92.5 |
| 1269 | 14v-01-OmnicapCube—fe2c4—23   | -3272.372633 | 92.6 |
| 1270 | 14v-02-BicapHexAnPr—fe2c4—765 | -3272.372584 | 92.7 |
| 1271 | 14v-02-BicapHexAnPr—fe2c4—601 | -3272.372562 | 92.7 |
| 1272 | 14v-02-BicapHexAnPr—fe2c4—521 | -3272.372552 | 92.7 |



|      |                                 |              |      |
|------|---------------------------------|--------------|------|
| 1273 | 14v-04-HepPr--fe2c4--1282       | -3272.372502 | 92.7 |
| 1274 | 14v-03-BicapHexPr--fe2c4--1152  | -3272.372455 | 92.7 |
| 1275 | 14v-03-BicapHexPr--fe2c4--855   | -3272.372446 | 92.7 |
| 1276 | 14v-04-HepPr--fe2c4--1492       | -3272.372439 | 92.7 |
| 1277 | 14v-05-HepAnPr--fe2c4--1659     | -3272.372389 | 92.8 |
| 1278 | 14v-06-OmnicapOh--fe2c4--2272   | -3272.372372 | 92.8 |
| 1279 | 14v-01-OmnicapCube--fe2c4--61   | -3272.372336 | 92.8 |
| 1280 | 14v-02-BicapHexAnPr--fe2c4--759 | -3272.372329 | 92.8 |
| 1281 | 14v-06-OmnicapOh--fe2c4--2154   | -3272.372225 | 92.9 |
| 1282 | 14v-06-OmnicapOh--fe2c4--2264   | -3272.372237 | 92.9 |
| 1283 | 14v-01-OmnicapCube--fe2c4--264  | -3272.37221  | 92.9 |
| 1284 | 14v-02-BicapHexAnPr--fe2c4--654 | -3272.372192 | 92.9 |
| 1285 | 14v-03-BicapHexPr--fe2c4--1165  | -3272.372121 | 92.9 |
| 1286 | 14v-06-OmnicapOh--fe2c4--2229   | -3272.372099 | 93.0 |
| 1287 | 14v-03-BicapHexPr--fe2c4--1006  | -3272.372    | 93.0 |
| 1288 | 14v-03-BicapHexPr--fe2c4--869   | -3272.371923 | 93.1 |
| 1289 | 14v-03-BicapHexPr--fe2c4--884   | -3272.371908 | 93.1 |
| 1290 | 14v-02-BicapHexAnPr--fe2c4--481 | -3272.371892 | 93.1 |
| 1291 | 14v-04-HepPr--fe2c4--1381       | -3272.371882 | 93.1 |
| 1292 | 14v-03-BicapHexPr--fe2c4--888   | -3272.371767 | 93.2 |
| 1293 | 14v-06-OmnicapOh--fe2c4--1935   | -3272.371757 | 93.2 |
| 1294 | 14v-02-BicapHexAnPr--fe2c4--736 | -3272.371733 | 93.2 |
| 1295 | 14v-01-OmnicapCube--fe2c4--194  | -3272.371674 | 93.2 |
| 1296 | 14v-04-HepPr--fe2c4--1518       | -3272.37167  | 93.2 |
| 1297 | 14v-01-OmnicapCube--fe2c4--282  | -3272.371659 | 93.2 |
| 1298 | 14v-01-OmnicapCube--fe2c4--258  | -3272.371607 | 93.3 |
| 1299 | 14v-06-OmnicapOh--fe2c4--2007   | -3272.371488 | 93.3 |
| 1300 | 14v-02-BicapHexAnPr--fe2c4--756 | -3272.371469 | 93.4 |
| 1301 | 14v-02-BicapHexAnPr--fe2c4--746 | -3272.371468 | 93.4 |
| 1302 | 14v-06-OmnicapOh--fe2c4--1974   | -3272.371391 | 93.4 |
| 1303 | 14v-03-BicapHexPr--fe2c4--971   | -3272.371333 | 93.4 |
| 1304 | 14v-01-OmnicapCube--fe2c4--230  | -3272.371159 | 93.5 |
| 1305 | 14v-02-BicapHexAnPr--fe2c4--657 | -3272.37114  | 93.6 |
| 1306 | 14v-03-BicapHexPr--fe2c4--1148  | -3272.371134 | 93.6 |
| 1307 | 14v-01-OmnicapCube--fe2c4--225  | -3272.371085 | 93.6 |
| 1308 | 14v-06-OmnicapOh--fe2c4--2166   | -3272.370914 | 93.7 |
| 1309 | 14v-03-BicapHexPr--fe2c4--1077  | -3272.37088  | 93.7 |
| 1310 | 14v-01-OmnicapCube--fe2c4--57   | -3272.370747 | 93.8 |
| 1311 | 14v-04-HepPr--fe2c4--1443       | -3272.370669 | 93.9 |
| 1312 | 14v-02-BicapHexAnPr--fe2c4--707 | -3272.370614 | 93.9 |
| 1313 | 14v-05-HepAnPr--fe2c4--1818     | -3272.370608 | 93.9 |
| 1314 | 14v-01-OmnicapCube--fe2c4--65   | -3272.370492 | 94.0 |
| 1315 | 14v-04-HepPr--fe2c4--1264       | -3272.370486 | 94.0 |
| 1316 | 14v-03-BicapHexPr--fe2c4--1143  | -3272.370263 | 94.1 |
| 1317 | 14v-06-OmnicapOh--fe2c4--2293   | -3272.3702   | 94.1 |
| 1318 | 14v-01-OmnicapCube--fe2c4--73   | -3272.370156 | 94.2 |
| 1319 | 14v-06-OmnicapOh--fe2c4--2114   | -3272.37015  | 94.2 |
| 1320 | 14v-02-BicapHexAnPr--fe2c4--432 | -3272.370106 | 94.2 |
| 1321 | 14v-02-BicapHexAnPr--fe2c4--698 | -3272.369852 | 94.4 |
| 1322 | 14v-06-OmnicapOh--fe2c4--1971   | -3272.369816 | 94.4 |
| 1323 | 14v-06-OmnicapOh--fe2c4--1989   | -3272.369816 | 94.4 |

|      |                                 |              |      |
|------|---------------------------------|--------------|------|
| 1324 | 14v-05-HepAnPr--fe2c4--1701     | -3272.369791 | 94.4 |
| 1325 | 14v-06-OmnicapOh--fe2c4--1992   | -3272.369741 | 94.4 |
| 1326 | 14v-05-HepAnPr--fe2c4--1795     | -3272.369609 | 94.5 |
| 1327 | 14v-02-BicapHexAnPr--fe2c4--620 | -3272.369443 | 94.6 |
| 1328 | 14v-03-BicapHexPr--fe2c4--1168  | -3272.369438 | 94.6 |
| 1329 | 14v-06-OmnicapOh--fe2c4--2080   | -3272.369356 | 94.7 |
| 1330 | 14v-06-OmnicapOh--fe2c4--2064   | -3272.369346 | 94.7 |
| 1331 | 14v-06-OmnicapOh--fe2c4--2030   | -3272.369307 | 94.7 |
| 1332 | 14v-03-BicapHexPr--fe2c4--1047  | -3272.369002 | 94.9 |
| 1333 | 14v-06-OmnicapOh--fe2c4--2127   | -3272.368977 | 94.9 |
| 1334 | 14v-03-BicapHexPr--fe2c4--1133  | -3272.368957 | 94.9 |
| 1335 | 14v-01-OmnicapCube--fe2c4--60   | -3272.368938 | 94.9 |
| 1336 | 14v-03-BicapHexPr--fe2c4--1194  | -3272.368754 | 95.1 |
| 1337 | 14v-06-OmnicapOh--fe2c4--2091   | -3272.368718 | 95.1 |
| 1338 | 14v-01-OmnicapCube--fe2c4--69   | -3272.36865  | 95.1 |
| 1339 | 14v-02-BicapHexAnPr--fe2c4--550 | -3272.368627 | 95.1 |
| 1340 | 14v-06-OmnicapOh--fe2c4--1975   | -3272.368523 | 95.2 |
| 1341 | 14v-06-OmnicapOh--fe2c4--2021   | -3272.368377 | 95.3 |
| 1342 | 14v-02-BicapHexAnPr--fe2c4--572 | -3272.368354 | 95.3 |
| 1343 | 14v-06-OmnicapOh--fe2c4--2112   | -3272.368328 | 95.3 |
| 1344 | 14v-06-OmnicapOh--fe2c4--1968   | -3272.368267 | 95.4 |
| 1345 | 14v-02-BicapHexAnPr--fe2c4--606 | -3272.368169 | 95.4 |
| 1346 | 14v-03-BicapHexPr--fe2c4--1078  | -3272.368164 | 95.4 |
| 1347 | 14v-04-HepPr--fe2c4--1510       | -3272.367862 | 95.6 |
| 1348 | 14v-04-HepPr--fe2c4--1324       | -3272.367806 | 95.7 |
| 1349 | 14v-04-HepPr--fe2c4--1540       | -3272.367742 | 95.7 |
| 1350 | 14v-03-BicapHexPr--fe2c4--1001  | -3272.36771  | 95.7 |
| 1351 | 14v-06-OmnicapOh--fe2c4--2094   | -3272.36768  | 95.7 |
| 1352 | 14v-02-BicapHexAnPr--fe2c4--650 | -3272.367676 | 95.7 |
| 1353 | 14v-02-BicapHexAnPr--fe2c4--487 | -3272.367517 | 95.8 |
| 1354 | 14v-04-HepPr--fe2c4--1360       | -3272.367506 | 95.8 |
| 1355 | 14v-05-HepAnPr--fe2c4--1870     | -3272.36742  | 95.9 |
| 1356 | 14v-04-HepPr--fe2c4--1553       | -3272.367363 | 95.9 |
| 1357 | 14v-03-BicapHexPr--fe2c4--991   | -3272.367361 | 95.9 |
| 1358 | 14v-06-OmnicapOh--fe2c4--2199   | -3272.367198 | 96.0 |
| 1359 | 14v-04-HepPr--fe2c4--1496       | -3272.367138 | 96.1 |
| 1360 | 14v-03-BicapHexPr--fe2c4--1089  | -3272.367007 | 96.2 |
| 1361 | 14v-01-OmnicapCube--fe2c4--120  | -3272.366944 | 96.2 |
| 1362 | 14v-06-OmnicapOh--fe2c4--2218   | -3272.366809 | 96.3 |
| 1363 | 14v-05-HepAnPr--fe2c4--1685     | -3272.366704 | 96.3 |
| 1364 | 14v-02-BicapHexAnPr--fe2c4--554 | -3272.366586 | 96.4 |
| 1365 | 14v-04-HepPr--fe2c4--1536       | -3272.366457 | 96.5 |
| 1366 | 14v-04-HepPr--fe2c4--1353       | -3272.366382 | 96.5 |
| 1367 | 14v-03-BicapHexPr--fe2c4--931   | -3272.366325 | 96.6 |
| 1368 | 14v-02-BicapHexAnPr--fe2c4--693 | -3272.366244 | 96.6 |
| 1369 | 14v-06-OmnicapOh--fe2c4--2286   | -3272.366214 | 96.6 |
| 1370 | 14v-03-BicapHexPr--fe2c4--1087  | -3272.36603  | 96.8 |
| 1371 | 14v-03-BicapHexPr--fe2c4--1150  | -3272.366013 | 96.8 |
| 1372 | 14v-02-BicapHexAnPr--fe2c4--493 | -3272.365847 | 96.9 |
| 1373 | 14v-02-BicapHexAnPr--fe2c4--536 | -3272.36582  | 96.9 |
| 1374 | 14v-06-OmnicapOh--fe2c4--2104   | -3272.365786 | 96.9 |

|      |                                |              |      |
|------|--------------------------------|--------------|------|
| 1375 | 14v-06-OmnicapOh—fe2c4—-2162   | -3272.365786 | 96.9 |
| 1376 | 14v-01-OmnicapCube—fe2c4—-202  | -3272.365702 | 97.0 |
| 1377 | 14v-02-BicapHexAnPr—fe2c4—-593 | -3272.365673 | 97.0 |
| 1378 | 14v-04-HepPr—fe2c4—-1334       | -3272.365641 | 97.0 |
| 1379 | 14v-05-HepAnPr—fe2c4—-1809     | -3272.365634 | 97.0 |
| 1380 | 14v-01-OmnicapCube—fe2c4—-226  | -3272.365578 | 97.0 |
| 1381 | 14v-03-BicapHexPr—fe2c4—-1050  | -3272.36557  | 97.1 |
| 1382 | 14v-02-BicapHexAnPr—fe2c4—-546 | -3272.365496 | 97.1 |
| 1383 | 14v-06-OmnicapOh—fe2c4—-1951   | -3272.365372 | 97.2 |
| 1384 | 14v-01-OmnicapCube—fe2c4—-207  | -3272.365274 | 97.2 |
| 1385 | 14v-05-HepAnPr—fe2c4—-1704     | -3272.365156 | 97.3 |
| 1386 | 14v-02-BicapHexAnPr—fe2c4—-665 | -3272.364846 | 97.5 |
| 1387 | 14v-05-HepAnPr—fe2c4—-1688     | -3272.364827 | 97.5 |
| 1388 | 14v-06-OmnicapOh—fe2c4—-2051   | -3272.364763 | 97.6 |
| 1389 | 14v-04-HepPr—fe2c4—-1468       | -3272.364702 | 97.6 |
| 1390 | 14v-03-BicapHexPr—fe2c4—-1081  | -3272.364593 | 97.7 |
| 1391 | 14v-04-HepPr—fe2c4—-1564       | -3272.36446  | 97.8 |
| 1392 | 14v-06-OmnicapOh—fe2c4—-2191   | -3272.364394 | 97.8 |
| 1393 | 14v-06-OmnicapOh—fe2c4—-2245   | -3272.36438  | 97.8 |
| 1394 | 14v-06-OmnicapOh—fe2c4—-2086   | -3272.364375 | 97.8 |
| 1395 | 14v-04-HepPr—fe2c4—-1554       | -3272.364309 | 97.8 |
| 1396 | 14v-01-OmnicapCube—fe2c4—-5    | -3272.364301 | 97.8 |
| 1397 | 14v-05-HepAnPr—fe2c4—-1787     | -3272.364289 | 97.9 |
| 1398 | 14v-03-BicapHexPr—fe2c4—-1004  | -3272.364143 | 97.9 |
| 1399 | 14v-06-OmnicapOh—fe2c4—-2196   | -3272.364067 | 98.0 |
| 1400 | 14v-01-OmnicapCube—fe2c4—-50   | -3272.363874 | 98.1 |
| 1401 | 14v-01-OmnicapCube—fe2c4—-82   | -3272.363853 | 98.1 |
| 1402 | 14v-02-BicapHexAnPr—fe2c4—-557 | -3272.363438 | 98.4 |
| 1403 | 14v-02-BicapHexAnPr—fe2c4—-576 | -3272.363376 | 98.4 |
| 1404 | 14v-02-BicapHexAnPr—fe2c4—-562 | -3272.363345 | 98.4 |
| 1405 | 14v-06-OmnicapOh—fe2c4—-2079   | -3272.363205 | 98.5 |
| 1406 | 14v-02-BicapHexAnPr—fe2c4—-551 | -3272.363128 | 98.6 |
| 1407 | 14v-03-BicapHexPr—fe2c4—-804   | -3272.363125 | 98.6 |
| 1408 | 14v-02-BicapHexAnPr—fe2c4—-710 | -3272.362958 | 98.7 |
| 1409 | 14v-04-HepPr—fe2c4—-1451       | -3272.362837 | 98.8 |
| 1410 | 14v-01-OmnicapCube—fe2c4—-203  | -3272.362778 | 98.8 |
| 1411 | 14v-06-OmnicapOh—fe2c4—-2230   | -3272.362766 | 98.8 |
| 1412 | 14v-06-OmnicapOh—fe2c4—-2023   | -3272.362732 | 98.8 |
| 1413 | 14v-06-OmnicapOh—fe2c4—-2123   | -3272.362641 | 98.9 |
| 1414 | 14v-05-HepAnPr—fe2c4—-1798     | -3272.362534 | 99.0 |
| 1415 | 14v-02-BicapHexAnPr—fe2c4—-491 | -3272.362472 | 99.0 |
| 1416 | 14v-02-BicapHexAnPr—fe2c4—-571 | -3272.362464 | 99.0 |
| 1417 | 14v-01-OmnicapCube—fe2c4—-163  | -3272.362397 | 99.0 |
| 1418 | 14v-06-OmnicapOh—fe2c4—-2107   | -3272.362363 | 99.1 |
| 1419 | 14v-03-BicapHexPr—fe2c4—-1213  | -3272.362291 | 99.1 |
| 1420 | 14v-02-BicapHexAnPr—fe2c4—-519 | -3272.362128 | 99.2 |
| 1421 | 14v-04-HepPr—fe2c4—-1405       | -3272.362051 | 99.3 |
| 1422 | 14v-03-BicapHexPr—fe2c4—-1102  | -3272.362039 | 99.3 |
| 1423 | 14v-03-BicapHexPr—fe2c4—-1134  | -3272.361935 | 99.3 |
| 1424 | 14v-06-OmnicapOh—fe2c4—-1941   | -3272.36185  | 99.4 |
| 1425 | 14v-06-OmnicapOh—fe2c4—-1994   | -3272.361813 | 99.4 |

|      |                                 |              |       |
|------|---------------------------------|--------------|-------|
| 1426 | 14v-06-OmnicapOh--fe2c4--2212   | -3272.361805 | 99.4  |
| 1427 | 14v-03-BicapHexPr--fe2c4--1052  | -3272.361786 | 99.4  |
| 1428 | 14v-02-BicapHexAnPr--fe2c4--758 | -3272.361748 | 99.5  |
| 1429 | 14v-03-BicapHexPr--fe2c4--944   | -3272.361718 | 99.5  |
| 1430 | 14v-02-BicapHexAnPr--fe2c4--518 | -3272.361691 | 99.5  |
| 1431 | 14v-04-HepPr--fe2c4--1415       | -3272.361636 | 99.5  |
| 1432 | 14v-03-BicapHexPr--fe2c4--1234  | -3272.361577 | 99.6  |
| 1433 | 14v-03-BicapHexPr--fe2c4--771   | -3272.361546 | 99.6  |
| 1434 | 14v-02-BicapHexAnPr--fe2c4--638 | -3272.361292 | 99.7  |
| 1435 | 14v-02-BicapHexAnPr--fe2c4--494 | -3272.361173 | 99.8  |
| 1436 | 14v-04-HepPr--fe2c4--1390       | -3272.361087 | 99.9  |
| 1437 | 14v-01-OmnicapCube--fe2c4--138  | -3272.361086 | 99.9  |
| 1438 | 14v-02-BicapHexAnPr--fe2c4--514 | -3272.361042 | 99.9  |
| 1439 | 14v-02-BicapHexAnPr--fe2c4--621 | -3272.360984 | 99.9  |
| 1440 | 14v-02-BicapHexAnPr--fe2c4--626 | -3272.360887 | 100.0 |
| 1441 | 14v-02-BicapHexAnPr--fe2c4--684 | -3272.360718 | 100.1 |
| 1442 | 14v-06-OmnicapOh--fe2c4--2265   | -3272.360711 | 100.1 |
| 1443 | 14v-03-BicapHexPr--fe2c4--833   | -3272.360496 | 100.2 |
| 1444 | 14v-02-BicapHexAnPr--fe2c4--515 | -3272.360446 | 100.3 |
| 1445 | 14v-01-OmnicapCube--fe2c4--130  | -3272.360174 | 100.4 |
| 1446 | 14v-04-HepPr--fe2c4--1270       | -3272.359715 | 100.7 |
| 1447 | 14v-05-HepAnPr--fe2c4--1803     | -3272.359508 | 100.9 |
| 1448 | 14v-01-OmnicapCube--fe2c4--146  | -3272.359449 | 100.9 |
| 1449 | 14v-02-BicapHexAnPr--fe2c4--651 | -3272.359293 | 101.0 |
| 1450 | 14v-06-OmnicapOh--fe2c4--2254   | -3272.359287 | 101.0 |
| 1451 | 14v-03-BicapHexPr--fe2c4--1034  | -3272.359145 | 101.1 |
| 1452 | 14v-03-BicapHexPr--fe2c4--785   | -3272.359029 | 101.2 |
| 1453 | 14v-03-BicapHexPr--fe2c4--1113  | -3272.358995 | 101.2 |
| 1454 | 14v-01-OmnicapCube--fe2c4--272  | -3272.358986 | 101.2 |
| 1455 | 14v-05-HepAnPr--fe2c4--1638     | -3272.358922 | 101.2 |
| 1456 | 14v-02-BicapHexAnPr--fe2c4--516 | -3272.358912 | 101.2 |
| 1457 | 14v-02-BicapHexAnPr--fe2c4--483 | -3272.358776 | 101.3 |
| 1458 | 14v-02-BicapHexAnPr--fe2c4--512 | -3272.358672 | 101.4 |
| 1459 | 14v-03-BicapHexPr--fe2c4--1219  | -3272.358504 | 101.5 |
| 1460 | 14v-02-BicapHexAnPr--fe2c4--513 | -3272.358349 | 101.6 |
| 1461 | 14v-01-OmnicapCube--fe2c4--33   | -3272.358228 | 101.7 |
| 1462 | 14v-04-HepPr--fe2c4--1376       | -3272.358146 | 101.7 |
| 1463 | 14v-04-HepPr--fe2c4--1316       | -3272.357895 | 101.9 |
| 1464 | 14v-06-OmnicapOh--fe2c4--2238   | -3272.357861 | 101.9 |
| 1465 | 14v-05-HepAnPr--fe2c4--1865     | -3272.357783 | 101.9 |
| 1466 | 14v-03-BicapHexPr--fe2c4--1075  | -3272.357764 | 102.0 |
| 1467 | 14v-03-BicapHexPr--fe2c4--807   | -3272.357616 | 102.0 |
| 1468 | 14v-02-BicapHexAnPr--fe2c4--672 | -3272.35761  | 102.0 |
| 1469 | 14v-06-OmnicapOh--fe2c4--2137   | -3272.357595 | 102.1 |
| 1470 | 14v-02-BicapHexAnPr--fe2c4--727 | -3272.357334 | 102.2 |
| 1471 | 14v-06-OmnicapOh--fe2c4--2214   | -3272.35717  | 102.3 |
| 1472 | 14v-02-BicapHexAnPr--fe2c4--508 | -3272.357157 | 102.3 |
| 1473 | 14v-03-BicapHexPr--fe2c4--1085  | -3272.35712  | 102.4 |
| 1474 | 14v-02-BicapHexAnPr--fe2c4--767 | -3272.35706  | 102.4 |
| 1475 | 14v-01-OmnicapCube--fe2c4--231  | -3272.35698  | 102.4 |
| 1476 | 14v-06-OmnicapOh--fe2c4--2116   | -3272.356798 | 102.6 |

|      |                                 |              |       |
|------|---------------------------------|--------------|-------|
| 1477 | 14v-03-BicapHexPr--fe2c4--1084  | -3272.356769 | 102.6 |
| 1478 | 14v-04-HepPr--fe2c4--1439       | -3272.356734 | 102.6 |
| 1479 | 14v-02-BicapHexAnPr--fe2c4--503 | -3272.356715 | 102.6 |
| 1480 | 14v-01-OmnicapCube--fe2c4--237  | -3272.356708 | 102.6 |
| 1481 | 14v-06-OmnicapOh--fe2c4--1972   | -3272.356685 | 102.6 |
| 1482 | 14v-03-BicapHexPr--fe2c4--947   | -3272.356675 | 102.6 |
| 1483 | 14v-01-OmnicapCube--fe2c4--219  | -3272.356663 | 102.6 |
| 1484 | 14v-05-HepAnPr--fe2c4--1859     | -3272.356554 | 102.7 |
| 1485 | 14v-05-HepAnPr--fe2c4--1630     | -3272.356433 | 102.8 |
| 1486 | 14v-06-OmnicapOh--fe2c4--2101   | -3272.356156 | 103.0 |
| 1487 | 14v-04-HepPr--fe2c4--1321       | -3272.35596  | 103.1 |
| 1488 | 14v-03-BicapHexPr--fe2c4--1129  | -3272.355811 | 103.2 |
| 1489 | 14v-02-BicapHexAnPr--fe2c4--528 | -3272.355742 | 103.2 |
| 1490 | 14v-04-HepPr--fe2c4--1288       | -3272.355698 | 103.2 |
| 1491 | 14v-04-HepPr--fe2c4--1421       | -3272.355651 | 103.3 |
| 1492 | 14v-06-OmnicapOh--fe2c4--2241   | -3272.355496 | 103.4 |
| 1493 | 14v-04-HepPr--fe2c4--1440       | -3272.355482 | 103.4 |
| 1494 | 14v-01-OmnicapCube--fe2c4--66   | -3272.355297 | 103.5 |
| 1495 | 14v-04-HepPr--fe2c4--1543       | -3272.355054 | 103.7 |
| 1496 | 14v-04-HepPr--fe2c4--1530       | -3272.355038 | 103.7 |
| 1497 | 14v-01-OmnicapCube--fe2c4--7    | -3272.354867 | 103.8 |
| 1498 | 14v-02-BicapHexAnPr--fe2c4--343 | -3272.35484  | 103.8 |
| 1499 | 14v-04-HepPr--fe2c4--1539       | -3272.35481  | 103.8 |
| 1500 | 14v-04-HepPr--fe2c4--1291       | -3272.354794 | 103.8 |
| 1501 | 14v-06-OmnicapOh--fe2c4--2105   | -3272.35479  | 103.8 |
| 1502 | 14v-03-BicapHexPr--fe2c4--827   | -3272.354647 | 103.9 |
| 1503 | 14v-01-OmnicapCube--fe2c4--95   | -3272.354454 | 104.0 |
| 1504 | 14v-05-HepAnPr--fe2c4--1748     | -3272.35445  | 104.0 |
| 1505 | 14v-01-OmnicapCube--fe2c4--106  | -3272.354241 | 104.2 |
| 1506 | 14v-01-OmnicapCube--fe2c4--269  | -3272.353961 | 104.3 |
| 1507 | 14v-03-BicapHexPr--fe2c4--1104  | -3272.353959 | 104.3 |
| 1508 | 14v-04-HepPr--fe2c4--1436       | -3272.353934 | 104.4 |
| 1509 | 14v-04-HepPr--fe2c4--1563       | -3272.353872 | 104.4 |
| 1510 | 14v-04-HepPr--fe2c4--1525       | -3272.353854 | 104.4 |
| 1511 | 14v-02-BicapHexAnPr--fe2c4--669 | -3272.353849 | 104.4 |
| 1512 | 14v-04-HepPr--fe2c4--1526       | -3272.35384  | 104.4 |
| 1513 | 14v-06-OmnicapOh--fe2c4--2066   | -3272.35382  | 104.4 |
| 1514 | 14v-02-BicapHexAnPr--fe2c4--499 | -3272.353795 | 104.4 |
| 1515 | 14v-06-OmnicapOh--fe2c4--2175   | -3272.353767 | 104.5 |
| 1516 | 14v-05-HepAnPr--fe2c4--1842     | -3272.35374  | 104.5 |
| 1517 | 14v-01-OmnicapCube--fe2c4--177  | -3272.353727 | 104.5 |
| 1518 | 14v-06-OmnicapOh--fe2c4--2078   | -3272.35345  | 104.7 |
| 1519 | 14v-04-HepPr--fe2c4--1323       | -3272.35341  | 104.7 |
| 1520 | 14v-02-BicapHexAnPr--fe2c4--365 | -3272.35324  | 104.8 |
| 1521 | 14v-02-BicapHexAnPr--fe2c4--555 | -3272.353206 | 104.8 |
| 1522 | 14v-06-OmnicapOh--fe2c4--1938   | -3272.352926 | 105.0 |
| 1523 | 14v-06-OmnicapOh--fe2c4--2108   | -3272.352908 | 105.0 |
| 1524 | 14v-01-OmnicapCube--fe2c4--111  | -3272.352839 | 105.0 |
| 1525 | 14v-01-OmnicapCube--fe2c4--232  | -3272.352706 | 105.1 |
| 1526 | 14v-06-OmnicapOh--fe2c4--1943   | -3272.352695 | 105.1 |
| 1527 | 14v-01-OmnicapCube--fe2c4--220  | -3272.352665 | 105.2 |

|      |                               |              |       |
|------|-------------------------------|--------------|-------|
| 1528 | 14v-02-BicapHexAnPr—fe2c4—526 | -3272.352547 | 105.2 |
| 1529 | 14v-06-OmnicapOh—fe2c4—2136   | -3272.35231  | 105.4 |
| 1530 | 14v-06-OmnicapOh—fe2c4—1937   | -3272.352271 | 105.4 |
| 1531 | 14v-05-HepAnPr—fe2c4—1681     | -3272.352121 | 105.5 |
| 1532 | 14v-06-OmnicapOh—fe2c4—1961   | -3272.352066 | 105.5 |
| 1533 | 14v-02-BicapHexAnPr—fe2c4—500 | -3272.352049 | 105.5 |
| 1534 | 14v-02-BicapHexAnPr—fe2c4—490 | -3272.351922 | 105.6 |
| 1535 | 14v-02-BicapHexAnPr—fe2c4—630 | -3272.351849 | 105.7 |
| 1536 | 14v-01-OmnicapCube—fe2c4—288  | -3272.35178  | 105.7 |
| 1537 | 14v-06-OmnicapOh—fe2c4—2201   | -3272.351629 | 105.8 |
| 1538 | 14v-03-BicapHexPr—fe2c4—1099  | -3272.351385 | 106.0 |
| 1539 | 14v-02-BicapHexAnPr—fe2c4—501 | -3272.351105 | 106.1 |
| 1540 | 14v-03-BicapHexPr—fe2c4—1044  | -3272.351079 | 106.1 |
| 1541 | 14v-02-BicapHexAnPr—fe2c4—636 | -3272.351038 | 106.2 |
| 1542 | 14v-03-BicapHexPr—fe2c4—1054  | -3272.350996 | 106.2 |
| 1543 | 14v-05-HepAnPr—fe2c4—1855     | -3272.350971 | 106.2 |
| 1544 | 14v-01-OmnicapCube—fe2c4—81   | -3272.350965 | 106.2 |
| 1545 | 14v-04-HepPr—fe2c4—1382       | -3272.350952 | 106.2 |
| 1546 | 14v-06-OmnicapOh—fe2c4—2138   | -3272.350844 | 106.3 |
| 1547 | 14v-01-OmnicapCube—fe2c4—85   | -3272.350632 | 106.4 |
| 1548 | 14v-06-OmnicapOh—fe2c4—1984   | -3272.350616 | 106.4 |
| 1549 | 14v-05-HepAnPr—fe2c4—1814     | -3272.350572 | 106.5 |
| 1550 | 14v-05-HepAnPr—fe2c4—1692     | -3272.350495 | 106.5 |
| 1551 | 14v-02-BicapHexAnPr—fe2c4—485 | -3272.350445 | 106.5 |
| 1552 | 14v-03-BicapHexPr—fe2c4—1183  | -3272.350431 | 106.6 |
| 1553 | 14v-06-OmnicapOh—fe2c4—2130   | -3272.350324 | 106.6 |
| 1554 | 14v-01-OmnicapCube—fe2c4—273  | -3272.350311 | 106.6 |
| 1555 | 14v-01-OmnicapCube—fe2c4—55   | -3272.350067 | 106.8 |
| 1556 | 14v-06-OmnicapOh—fe2c4—2211   | -3272.349805 | 106.9 |
| 1557 | 14v-01-OmnicapCube—fe2c4—125  | -3272.349797 | 107.0 |
| 1558 | 14v-03-BicapHexPr—fe2c4—806   | -3272.349782 | 107.0 |
| 1559 | 14v-06-OmnicapOh—fe2c4—2171   | -3272.349774 | 107.0 |
| 1560 | 14v-06-OmnicapOh—fe2c4—2194   | -3272.349772 | 107.0 |
| 1561 | 14v-01-OmnicapCube—fe2c4—100  | -3272.349663 | 107.0 |
| 1562 | 14v-02-BicapHexAnPr—fe2c4—687 | -3272.349451 | 107.2 |
| 1563 | 14v-04-HepPr—fe2c4—1296       | -3272.349443 | 107.2 |
| 1564 | 14v-03-BicapHexPr—fe2c4—1221  | -3272.349415 | 107.2 |
| 1565 | 14v-03-BicapHexPr—fe2c4—928   | -3272.349366 | 107.2 |
| 1566 | 14v-01-OmnicapCube—fe2c4—32   | -3272.349317 | 107.3 |
| 1567 | 14v-03-BicapHexPr—fe2c4—1232  | -3272.349306 | 107.3 |
| 1568 | 14v-02-BicapHexAnPr—fe2c4—712 | -3272.349298 | 107.3 |
| 1569 | 14v-05-HepAnPr—fe2c4—1716     | -3272.349275 | 107.3 |
| 1570 | 14v-02-BicapHexAnPr—fe2c4—376 | -3272.349058 | 107.4 |
| 1571 | 14v-01-OmnicapCube—fe2c4—35   | -3272.349016 | 107.4 |
| 1572 | 14v-06-OmnicapOh—fe2c4—2163   | -3272.348849 | 107.5 |
| 1573 | 14v-02-BicapHexAnPr—fe2c4—366 | -3272.348768 | 107.6 |
| 1574 | 14v-03-BicapHexPr—fe2c4—913   | -3272.348662 | 107.7 |
| 1575 | 14v-03-BicapHexPr—fe2c4—1056  | -3272.348643 | 107.7 |
| 1576 | 14v-02-BicapHexAnPr—fe2c4—628 | -3272.348531 | 107.7 |
| 1577 | 14v-02-BicapHexAnPr—fe2c4—520 | -3272.348494 | 107.8 |
| 1578 | 14v-03-BicapHexPr—fe2c4—1121  | -3272.348449 | 107.8 |

|      |                               |              |       |
|------|-------------------------------|--------------|-------|
| 1579 | 14v-04-HepPr—fe2c4—1566       | -3272.348428 | 107.8 |
| 1580 | 14v-01-OmnicapCube—fe2c4—229  | -3272.348411 | 107.8 |
| 1581 | 14v-01-OmnicapCube—fe2c4—132  | -3272.348382 | 107.8 |
| 1582 | 14v-01-OmnicapCube—fe2c4—74   | -3272.348351 | 107.9 |
| 1583 | 14v-03-BicapHexPr—fe2c4—1093  | -3272.348345 | 107.9 |
| 1584 | 14v-01-OmnicapCube—fe2c4—102  | -3272.348273 | 107.9 |
| 1585 | 14v-06-OmnicapOh—fe2c4—2284   | -3272.348185 | 108.0 |
| 1586 | 14v-03-BicapHexPr—fe2c4—954   | -3272.348096 | 108.0 |
| 1587 | 14v-02-BicapHexAnPr—fe2c4—659 | -3272.348087 | 108.0 |
| 1588 | 14v-04-HepPr—fe2c4—1503       | -3272.34803  | 108.1 |
| 1589 | 14v-01-OmnicapCube—fe2c4—75   | -3272.348025 | 108.1 |
| 1590 | 14v-01-OmnicapCube—fe2c4—18   | -3272.347948 | 108.1 |
| 1591 | 14v-01-OmnicapCube—fe2c4—144  | -3272.347904 | 108.1 |
| 1592 | 14v-02-BicapHexAnPr—fe2c4—764 | -3272.347836 | 108.2 |
| 1593 | 14v-01-OmnicapCube—fe2c4—142  | -3272.347823 | 108.2 |
| 1594 | 14v-05-HepAnPr—fe2c4—1717     | -3272.347776 | 108.2 |
| 1595 | 14v-02-BicapHexAnPr—fe2c4—688 | -3272.347771 | 108.2 |
| 1596 | 14v-01-OmnicapCube—fe2c4—136  | -3272.34771  | 108.3 |
| 1597 | 14v-04-HepPr—fe2c4—1379       | -3272.347704 | 108.3 |
| 1598 | 14v-01-OmnicapCube—fe2c4—8    | -3272.347696 | 108.3 |
| 1599 | 14v-04-HepPr—fe2c4—1467       | -3272.347692 | 108.3 |
| 1600 | 14v-06-OmnicapOh—fe2c4—2299   | -3272.347673 | 108.3 |
| 1601 | 14v-05-HepAnPr—fe2c4—1856     | -3272.347619 | 108.3 |
| 1602 | 14v-06-OmnicapOh—fe2c4—2224   | -3272.347543 | 108.4 |
| 1603 | 14v-04-HepPr—fe2c4—1481       | -3272.34727  | 108.5 |
| 1604 | 14v-06-OmnicapOh—fe2c4—1934   | -3272.34727  | 108.5 |
| 1605 | 14v-03-BicapHexPr—fe2c4—965   | -3272.347234 | 108.6 |
| 1606 | 14v-04-HepPr—fe2c4—1528       | -3272.347145 | 108.6 |
| 1607 | 14v-03-BicapHexPr—fe2c4—1083  | -3272.346967 | 108.7 |
| 1608 | 14v-06-OmnicapOh—fe2c4—2274   | -3272.34689  | 108.8 |
| 1609 | 14v-04-HepPr—fe2c4—1268       | -3272.34688  | 108.8 |
| 1610 | 14v-05-HepAnPr—fe2c4—1866     | -3272.34672  | 108.9 |
| 1611 | 14v-03-BicapHexPr—fe2c4—793   | -3272.346691 | 108.9 |
| 1612 | 14v-02-BicapHexAnPr—fe2c4—482 | -3272.346519 | 109.0 |
| 1613 | 14v-03-BicapHexPr—fe2c4—1128  | -3272.346507 | 109.0 |
| 1614 | 14v-03-BicapHexPr—fe2c4—972   | -3272.346399 | 109.1 |
| 1615 | 14v-06-OmnicapOh—fe2c4—2016   | -3272.346283 | 109.2 |
| 1616 | 14v-04-HepPr—fe2c4—1397       | -3272.346223 | 109.2 |
| 1617 | 14v-05-HepAnPr—fe2c4—1640     | -3272.346134 | 109.2 |
| 1618 | 14v-03-BicapHexPr—fe2c4—1095  | -3272.34606  | 109.3 |
| 1619 | 14v-06-OmnicapOh—fe2c4—2240   | -3272.345889 | 109.4 |
| 1620 | 14v-06-OmnicapOh—fe2c4—2155   | -3272.345719 | 109.5 |
| 1621 | 14v-02-BicapHexAnPr—fe2c4—489 | -3272.345563 | 109.6 |
| 1622 | 14v-05-HepAnPr—fe2c4—1718     | -3272.345546 | 109.6 |
| 1623 | 14v-06-OmnicapOh—fe2c4—2126   | -3272.345546 | 109.6 |
| 1624 | 14v-05-HepAnPr—fe2c4—1604     | -3272.345451 | 109.7 |
| 1625 | 14v-05-HepAnPr—fe2c4—1827     | -3272.345438 | 109.7 |
| 1626 | 14v-03-BicapHexPr—fe2c4—1003  | -3272.345436 | 109.7 |
| 1627 | 14v-01-OmnicapCube—fe2c4—268  | -3272.34539  | 109.7 |
| 1628 | 14v-03-BicapHexPr—fe2c4—1170  | -3272.345347 | 109.7 |
| 1629 | 14v-06-OmnicapOh—fe2c4—1942   | -3272.34532  | 109.8 |

|      |                                 |              |       |
|------|---------------------------------|--------------|-------|
| 1630 | 14v-04-HepPr--fe2c4--1303       | -3272.345227 | 109.8 |
| 1631 | 14v-06-OmnicapOh--fe2c4--2202   | -3272.345171 | 109.9 |
| 1632 | 14v-06-OmnicapOh--fe2c4--2068   | -3272.345148 | 109.9 |
| 1633 | 14v-05-HepAnPr--fe2c4--1840     | -3272.345105 | 109.9 |
| 1634 | 14v-01-OmnicapCube--fe2c4--59   | -3272.34503  | 109.9 |
| 1635 | 14v-01-OmnicapCube--fe2c4--68   | -3272.345012 | 110.0 |
| 1636 | 14v-06-OmnicapOh--fe2c4--2125   | -3272.345008 | 110.0 |
| 1637 | 14v-01-OmnicapCube--fe2c4--91   | -3272.344841 | 110.1 |
| 1638 | 14v-04-HepPr--fe2c4--1559       | -3272.344815 | 110.1 |
| 1639 | 14v-03-BicapHexPr--fe2c4--939   | -3272.344503 | 110.3 |
| 1640 | 14v-01-OmnicapCube--fe2c4--217  | -3272.344289 | 110.4 |
| 1641 | 14v-01-OmnicapCube--fe2c4--227  | -3272.344289 | 110.4 |
| 1642 | 14v-05-HepAnPr--fe2c4--1623     | -3272.344279 | 110.4 |
| 1643 | 14v-01-OmnicapCube--fe2c4--211  | -3272.344201 | 110.5 |
| 1644 | 14v-04-HepPr--fe2c4--1393       | -3272.344197 | 110.5 |
| 1645 | 14v-01-OmnicapCube--fe2c4--224  | -3272.344136 | 110.5 |
| 1646 | 14v-01-OmnicapCube--fe2c4--37   | -3272.3439   | 110.7 |
| 1647 | 14v-01-OmnicapCube--fe2c4--121  | -3272.34388  | 110.7 |
| 1648 | 14v-04-HepPr--fe2c4--1267       | -3272.343709 | 110.8 |
| 1649 | 14v-05-HepAnPr--fe2c4--1845     | -3272.343672 | 110.8 |
| 1650 | 14v-05-HepAnPr--fe2c4--1696     | -3272.343665 | 110.8 |
| 1651 | 14v-03-BicapHexPr--fe2c4--933   | -3272.343445 | 110.9 |
| 1652 | 14v-02-BicapHexAnPr--fe2c4--522 | -3272.343021 | 111.2 |
| 1653 | 14v-03-BicapHexPr--fe2c4--848   | -3272.342973 | 111.2 |
| 1654 | 14v-03-BicapHexPr--fe2c4--1019  | -3272.342961 | 111.2 |
| 1655 | 14v-05-HepAnPr--fe2c4--1611     | -3272.342782 | 111.4 |
| 1656 | 14v-03-BicapHexPr--fe2c4--1059  | -3272.342728 | 111.4 |
| 1657 | 14v-06-OmnicapOh--fe2c4--2192   | -3272.342296 | 111.7 |
| 1658 | 14v-04-HepPr--fe2c4--1561       | -3272.342147 | 111.8 |
| 1659 | 14v-05-HepAnPr--fe2c4--1755     | -3272.342065 | 111.8 |
| 1660 | 14v-03-BicapHexPr--fe2c4--1036  | -3272.341952 | 111.9 |
| 1661 | 14v-05-HepAnPr--fe2c4--1846     | -3272.341945 | 111.9 |
| 1662 | 14v-04-HepPr--fe2c4--1320       | -3272.341778 | 112.0 |
| 1663 | 14v-02-BicapHexAnPr--fe2c4--662 | -3272.341677 | 112.0 |
| 1664 | 14v-02-BicapHexAnPr--fe2c4--666 | -3272.341102 | 112.4 |
| 1665 | 14v-05-HepAnPr--fe2c4--1686     | -3272.340792 | 112.6 |
| 1666 | 14v-04-HepPr--fe2c4--1572       | -3272.340791 | 112.6 |
| 1667 | 14v-05-HepAnPr--fe2c4--1673     | -3272.340524 | 112.8 |
| 1668 | 14v-03-BicapHexPr--fe2c4--1115  | -3272.340351 | 112.9 |
| 1669 | 14v-03-BicapHexPr--fe2c4--1070  | -3272.340313 | 112.9 |
| 1670 | 14v-03-BicapHexPr--fe2c4--1100  | -3272.340232 | 113.0 |
| 1671 | 14v-06-OmnicapOh--fe2c4--2031   | -3272.340198 | 113.0 |
| 1672 | 14v-04-HepPr--fe2c4--1460       | -3272.340193 | 113.0 |
| 1673 | 14v-03-BicapHexPr--fe2c4--1116  | -3272.34018  | 113.0 |
| 1674 | 14v-06-OmnicapOh--fe2c4--2225   | -3272.340162 | 113.0 |
| 1675 | 14v-05-HepAnPr--fe2c4--1821     | -3272.340075 | 113.1 |
| 1676 | 14v-04-HepPr--fe2c4--1426       | -3272.340063 | 113.1 |
| 1677 | 14v-06-OmnicapOh--fe2c4--2139   | -3272.339959 | 113.1 |
| 1678 | 14v-04-HepPr--fe2c4--1292       | -3272.339821 | 113.2 |
| 1679 | 14v-05-HepAnPr--fe2c4--1608     | -3272.339751 | 113.3 |
| 1680 | 14v-04-HepPr--fe2c4--1511       | -3272.339449 | 113.4 |



|      |                               |              |       |
|------|-------------------------------|--------------|-------|
| 1681 | 14v-01-OmnicapCube—fe2c4—248  | -3272.339399 | 113.5 |
| 1682 | 14v-03-BicapHexPr—fe2c4—1139  | -3272.339337 | 113.5 |
| 1683 | 14v-04-HepPr—fe2c4—1311       | -3272.339166 | 113.6 |
| 1684 | 14v-06-OmnicapOh—fe2c4—2111   | -3272.33916  | 113.6 |
| 1685 | 14v-01-OmnicapCube—fe2c4—127  | -3272.339007 | 113.7 |
| 1686 | 14v-03-BicapHexPr—fe2c4—923   | -3272.33894  | 113.8 |
| 1687 | 14v-05-HepAnPr—fe2c4—1678     | -3272.33876  | 113.9 |
| 1688 | 14v-04-HepPr—fe2c4—1253       | -3272.338472 | 114.1 |
| 1689 | 14v-04-HepPr—fe2c4—1523       | -3272.338405 | 114.1 |
| 1690 | 14v-06-OmnicapOh—fe2c4—2177   | -3272.338374 | 114.1 |
| 1691 | 14v-05-HepAnPr—fe2c4—1878     | -3272.338264 | 114.2 |
| 1692 | 14v-03-BicapHexPr—fe2c4—832   | -3272.338245 | 114.2 |
| 1693 | 14v-02-BicapHexAnPr—fe2c4—504 | -3272.3382   | 114.2 |
| 1694 | 14v-03-BicapHexPr—fe2c4—1021  | -3272.33814  | 114.3 |
| 1695 | 14v-04-HepPr—fe2c4—1413       | -3272.338116 | 114.3 |
| 1696 | 14v-04-HepPr—fe2c4—1484       | -3272.337987 | 114.4 |
| 1697 | 14v-04-HepPr—fe2c4—1512       | -3272.337984 | 114.4 |
| 1698 | 14v-06-OmnicapOh—fe2c4—1930   | -3272.337929 | 114.4 |
| 1699 | 14v-03-BicapHexPr—fe2c4—951   | -3272.337646 | 114.6 |
| 1700 | 14v-04-HepPr—fe2c4—1367       | -3272.337619 | 114.6 |
| 1701 | 14v-02-BicapHexAnPr—fe2c4—679 | -3272.337522 | 114.7 |
| 1702 | 14v-03-BicapHexPr—fe2c4—1120  | -3272.337454 | 114.7 |
| 1703 | 14v-06-OmnicapOh—fe2c4—1953   | -3272.337309 | 114.8 |
| 1704 | 14v-06-OmnicapOh—fe2c4—2098   | -3272.337278 | 114.8 |
| 1705 | 14v-04-HepPr—fe2c4—1278       | -3272.337137 | 114.9 |
| 1706 | 14v-04-HepPr—fe2c4—1567       | -3272.336936 | 115.0 |
| 1707 | 14v-02-BicapHexAnPr—fe2c4—498 | -3272.336676 | 115.2 |
| 1708 | 14v-06-OmnicapOh—fe2c4—2243   | -3272.33658  | 115.2 |
| 1709 | 14v-03-BicapHexPr—fe2c4—955   | -3272.336532 | 115.3 |
| 1710 | 14v-06-OmnicapOh—fe2c4—2301   | -3272.336469 | 115.3 |
| 1711 | 14v-01-OmnicapCube—fe2c4—141  | -3272.336289 | 115.4 |
| 1712 | 14v-04-HepPr—fe2c4—1374       | -3272.336171 | 115.5 |
| 1713 | 14v-04-HepPr—fe2c4—1479       | -3272.336007 | 115.6 |
| 1714 | 14v-06-OmnicapOh—fe2c4—2295   | -3272.335991 | 115.6 |
| 1715 | 14v-03-BicapHexPr—fe2c4—987   | -3272.335918 | 115.7 |
| 1716 | 14v-04-HepPr—fe2c4—1531       | -3272.33557  | 115.9 |
| 1717 | 14v-04-HepPr—fe2c4—1558       | -3272.335477 | 115.9 |
| 1718 | 14v-03-BicapHexPr—fe2c4—924   | -3272.335243 | 116.1 |
| 1719 | 14v-05-HepAnPr—fe2c4—1781     | -3272.334994 | 116.2 |
| 1720 | 14v-05-HepAnPr—fe2c4—1720     | -3272.334904 | 116.3 |
| 1721 | 14v-02-BicapHexAnPr—fe2c4—639 | -3272.33484  | 116.3 |
| 1722 | 14v-04-HepPr—fe2c4—1509       | -3272.334706 | 116.4 |
| 1723 | 14v-03-BicapHexPr—fe2c4—1147  | -3272.334624 | 116.5 |
| 1724 | 14v-06-OmnicapOh—fe2c4—2065   | -3272.334596 | 116.5 |
| 1725 | 14v-01-OmnicapCube—fe2c4—119  | -3272.334569 | 116.5 |
| 1726 | 14v-04-HepPr—fe2c4—1273       | -3272.334438 | 116.6 |
| 1727 | 14v-06-OmnicapOh—fe2c4—2223   | -3272.334395 | 116.6 |
| 1728 | 14v-05-HepAnPr—fe2c4—1679     | -3272.33433  | 116.7 |
| 1729 | 14v-02-BicapHexAnPr—fe2c4—711 | -3272.334306 | 116.7 |
| 1730 | 14v-05-HepAnPr—fe2c4—1778     | -3272.334298 | 116.7 |
| 1731 | 14v-05-HepAnPr—fe2c4—1715     | -3272.334254 | 116.7 |

|      |                                 |              |       |
|------|---------------------------------|--------------|-------|
| 1732 | 14v-05-HepAnPr--fe2c4--1728     | -3272.334119 | 116.8 |
| 1733 | 14v-03-BicapHexPr--fe2c4--1220  | -3272.334109 | 116.8 |
| 1734 | 14v-01-OmnicapCube--fe2c4--251  | -3272.334069 | 116.8 |
| 1735 | 14v-02-BicapHexAnPr--fe2c4--517 | -3272.334032 | 116.8 |
| 1736 | 14v-05-HepAnPr--fe2c4--1596     | -3272.333964 | 116.9 |
| 1737 | 14v-04-HepPr--fe2c4--1314       | -3272.333893 | 116.9 |
| 1738 | 14v-05-HepAnPr--fe2c4--1828     | -3272.333743 | 117.0 |
| 1739 | 14v-05-HepAnPr--fe2c4--1850     | -3272.33365  | 117.1 |
| 1740 | 14v-06-OmnicapOh--fe2c4--2273   | -3272.333576 | 117.1 |
| 1741 | 14v-02-BicapHexAnPr--fe2c4--716 | -3272.333542 | 117.2 |
| 1742 | 14v-05-HepAnPr--fe2c4--1683     | -3272.333533 | 117.2 |
| 1743 | 14v-05-HepAnPr--fe2c4--1826     | -3272.333394 | 117.2 |
| 1744 | 14v-02-BicapHexAnPr--fe2c4--502 | -3272.333148 | 117.4 |
| 1745 | 14v-04-HepPr--fe2c4--1396       | -3272.333082 | 117.4 |
| 1746 | 14v-06-OmnicapOh--fe2c4--2303   | -3272.333004 | 117.5 |
| 1747 | 14v-04-HepPr--fe2c4--1433       | -3272.332861 | 117.6 |
| 1748 | 14v-03-BicapHexPr--fe2c4--1153  | -3272.332833 | 117.6 |
| 1749 | 14v-06-OmnicapOh--fe2c4--2222   | -3272.332722 | 117.7 |
| 1750 | 14v-02-BicapHexAnPr--fe2c4--524 | -3272.332586 | 117.8 |
| 1751 | 14v-05-HepAnPr--fe2c4--1713     | -3272.33247  | 117.8 |
| 1752 | 14v-04-HepPr--fe2c4--1565       | -3272.332454 | 117.8 |
| 1753 | 14v-03-BicapHexPr--fe2c4--841   | -3272.332435 | 117.8 |
| 1754 | 14v-02-BicapHexAnPr--fe2c4--720 | -3272.331821 | 118.2 |
| 1755 | 14v-01-OmnicapCube--fe2c4--117  | -3272.33177  | 118.3 |
| 1756 | 14v-05-HepAnPr--fe2c4--1805     | -3272.331723 | 118.3 |
| 1757 | 14v-04-HepPr--fe2c4--1419       | -3272.331661 | 118.3 |
| 1758 | 14v-04-HepPr--fe2c4--1576       | -3272.331605 | 118.4 |
| 1759 | 14v-06-OmnicapOh--fe2c4--2025   | -3272.331526 | 118.4 |
| 1760 | 14v-04-HepPr--fe2c4--1272       | -3272.331397 | 118.5 |
| 1761 | 14v-05-HepAnPr--fe2c4--1609     | -3272.331336 | 118.5 |
| 1762 | 14v-05-HepAnPr--fe2c4--1634     | -3272.331102 | 118.7 |
| 1763 | 14v-05-HepAnPr--fe2c4--1643     | -3272.331058 | 118.7 |
| 1764 | 14v-02-BicapHexAnPr--fe2c4--367 | -3272.330988 | 118.8 |
| 1765 | 14v-06-OmnicapOh--fe2c4--1979   | -3272.330911 | 118.8 |
| 1766 | 14v-02-BicapHexAnPr--fe2c4--527 | -3272.330688 | 118.9 |
| 1767 | 14v-04-HepPr--fe2c4--1535       | -3272.330675 | 119.0 |
| 1768 | 14v-04-HepPr--fe2c4--1448       | -3272.330639 | 119.0 |
| 1769 | 14v-06-OmnicapOh--fe2c4--1928   | -3272.330633 | 119.0 |
| 1770 | 14v-05-HepAnPr--fe2c4--1610     | -3272.330502 | 119.1 |
| 1771 | 14v-05-HepAnPr--fe2c4--1702     | -3272.330414 | 119.1 |
| 1772 | 14v-04-HepPr--fe2c4--1299       | -3272.330208 | 119.2 |
| 1773 | 14v-06-OmnicapOh--fe2c4--2184   | -3272.330189 | 119.3 |
| 1774 | 14v-04-HepPr--fe2c4--1475       | -3272.329792 | 119.5 |
| 1775 | 14v-02-BicapHexAnPr--fe2c4--484 | -3272.329773 | 119.5 |
| 1776 | 14v-05-HepAnPr--fe2c4--1674     | -3272.329514 | 119.7 |
| 1777 | 14v-03-BicapHexPr--fe2c4--915   | -3272.329423 | 119.7 |
| 1778 | 14v-05-HepAnPr--fe2c4--1848     | -3272.329306 | 119.8 |
| 1779 | 14v-01-OmnicapCube--fe2c4--113  | -3272.329252 | 119.8 |
| 1780 | 14v-04-HepPr--fe2c4--1283       | -3272.329249 | 119.8 |
| 1781 | 14v-04-HepPr--fe2c4--1259       | -3272.32923  | 119.9 |
| 1782 | 14v-04-HepPr--fe2c4--1487       | -3272.329041 | 120.0 |

|      |                                 |              |       |
|------|---------------------------------|--------------|-------|
| 1783 | 14v-04-HepPr--fe2c4--1254       | -3272.328818 | 120.1 |
| 1784 | 14v-06-OmnicapOh--fe2c4--1999   | -3272.328728 | 120.2 |
| 1785 | 14v-06-OmnicapOh--fe2c4--2233   | -3272.328711 | 120.2 |
| 1786 | 14v-06-OmnicapOh--fe2c4--2256   | -3272.328702 | 120.2 |
| 1787 | 14v-06-OmnicapOh--fe2c4--2168   | -3272.328632 | 120.2 |
| 1788 | 14v-01-OmnicapCube--fe2c4--105  | -3272.328468 | 120.3 |
| 1789 | 14v-05-HepAnPr--fe2c4--1868     | -3272.328445 | 120.4 |
| 1790 | 14v-04-HepPr--fe2c4--1490       | -3272.328427 | 120.4 |
| 1791 | 14v-01-OmnicapCube--fe2c4--88   | -3272.328336 | 120.4 |
| 1792 | 14v-05-HepAnPr--fe2c4--1719     | -3272.328334 | 120.4 |
| 1793 | 14v-06-OmnicapOh--fe2c4--2148   | -3272.328331 | 120.4 |
| 1794 | 14v-01-OmnicapCube--fe2c4--123  | -3272.328317 | 120.4 |
| 1795 | 14v-03-BicapHexPr--fe2c4--930   | -3272.328165 | 120.5 |
| 1796 | 14v-03-BicapHexPr--fe2c4--932   | -3272.328147 | 120.5 |
| 1797 | 14v-05-HepAnPr--fe2c4--1895     | -3272.328071 | 120.6 |
| 1798 | 14v-01-OmnicapCube--fe2c4--56   | -3272.327954 | 120.7 |
| 1799 | 14v-01-OmnicapCube--fe2c4--110  | -3272.327816 | 120.7 |
| 1800 | 14v-05-HepAnPr--fe2c4--1620     | -3272.327759 | 120.8 |
| 1801 | 14v-04-HepPr--fe2c4--1410       | -3272.327084 | 121.2 |
| 1802 | 14v-04-HepPr--fe2c4--1581       | -3272.32708  | 121.2 |
| 1803 | 14v-03-BicapHexPr--fe2c4--1057  | -3272.32699  | 121.3 |
| 1804 | 14v-06-OmnicapOh--fe2c4--2012   | -3272.32697  | 121.3 |
| 1805 | 14v-05-HepAnPr--fe2c4--1819     | -3272.326961 | 121.3 |
| 1806 | 14v-05-HepAnPr--fe2c4--1637     | -3272.326932 | 121.3 |
| 1807 | 14v-04-HepPr--fe2c4--1258       | -3272.326815 | 121.4 |
| 1808 | 14v-01-OmnicapCube--fe2c4--80   | -3272.32665  | 121.5 |
| 1809 | 14v-02-BicapHexAnPr--fe2c4--369 | -3272.326649 | 121.5 |
| 1810 | 14v-05-HepAnPr--fe2c4--1918     | -3272.326647 | 121.5 |
| 1811 | 14v-04-HepPr--fe2c4--1517       | -3272.326435 | 121.6 |
| 1812 | 14v-04-HepPr--fe2c4--1470       | -3272.326278 | 121.7 |
| 1813 | 14v-04-HepPr--fe2c4--1279       | -3272.326234 | 121.7 |
| 1814 | 14v-06-OmnicapOh--fe2c4--2183   | -3272.326209 | 121.8 |
| 1815 | 14v-03-BicapHexPr--fe2c4--818   | -3272.326145 | 121.8 |
| 1816 | 14v-05-HepAnPr--fe2c4--1764     | -3272.326141 | 121.8 |
| 1817 | 14v-03-BicapHexPr--fe2c4--1118  | -3272.326112 | 121.8 |
| 1818 | 14v-06-OmnicapOh--fe2c4--2186   | -3272.326041 | 121.9 |
| 1819 | 14v-04-HepPr--fe2c4--1262       | -3272.325901 | 121.9 |
| 1820 | 14v-05-HepAnPr--fe2c4--1714     | -3272.325788 | 122.0 |
| 1821 | 14v-05-HepAnPr--fe2c4--1603     | -3272.325543 | 122.2 |
| 1822 | 14v-06-OmnicapOh--fe2c4--2140   | -3272.32551  | 122.2 |
| 1823 | 14v-03-BicapHexPr--fe2c4--958   | -3272.325242 | 122.4 |
| 1824 | 14v-06-OmnicapOh--fe2c4--2164   | -3272.325201 | 122.4 |
| 1825 | 14v-04-HepPr--fe2c4--1432       | -3272.324975 | 122.5 |
| 1826 | 14v-04-HepPr--fe2c4--1582       | -3272.324951 | 122.5 |
| 1827 | 14v-06-OmnicapOh--fe2c4--2255   | -3272.324875 | 122.6 |
| 1828 | 14v-04-HepPr--fe2c4--1294       | -3272.324855 | 122.6 |
| 1829 | 14v-02-BicapHexAnPr--fe2c4--573 | -3272.324835 | 122.6 |
| 1830 | 14v-06-OmnicapOh--fe2c4--2082   | -3272.324815 | 122.6 |
| 1831 | 14v-02-BicapHexAnPr--fe2c4--671 | -3272.324701 | 122.7 |
| 1832 | 14v-04-HepPr--fe2c4--1527       | -3272.32461  | 122.8 |
| 1833 | 14v-02-BicapHexAnPr--fe2c4--505 | -3272.324269 | 123.0 |

|      |                               |              |       |
|------|-------------------------------|--------------|-------|
| 1834 | 14v-06-OmnicapOh—fe2c4—2129   | -3272.323953 | 123.2 |
| 1835 | 14v-05-HepAnPr—fe2c4—1882     | -3272.323909 | 123.2 |
| 1836 | 14v-06-OmnicapOh—fe2c4—2178   | -3272.32389  | 123.2 |
| 1837 | 14v-06-OmnicapOh—fe2c4—2203   | -3272.323886 | 123.2 |
| 1838 | 14v-02-BicapHexAnPr—fe2c4—509 | -3272.323818 | 123.3 |
| 1839 | 14v-02-BicapHexAnPr—fe2c4—495 | -3272.323581 | 123.4 |
| 1840 | 14v-01-OmnicapCube—fe2c4—128  | -3272.32354  | 123.4 |
| 1841 | 14v-02-BicapHexAnPr—fe2c4—652 | -3272.323173 | 123.7 |
| 1842 | 14v-05-HepAnPr—fe2c4—1825     | -3272.323076 | 123.7 |
| 1843 | 14v-05-HepAnPr—fe2c4—1852     | -3272.322947 | 123.8 |
| 1844 | 14v-04-HepPr—fe2c4—1400       | -3272.322791 | 123.9 |
| 1845 | 14v-05-HepAnPr—fe2c4—1863     | -3272.322759 | 123.9 |
| 1846 | 14v-04-HepPr—fe2c4—1569       | -3272.322521 | 124.1 |
| 1847 | 14v-04-HepPr—fe2c4—1545       | -3272.321854 | 124.5 |
| 1848 | 14v-04-HepPr—fe2c4—1430       | -3272.321548 | 124.7 |
| 1849 | 14v-05-HepAnPr—fe2c4—1663     | -3272.321497 | 124.7 |
| 1850 | 14v-04-HepPr—fe2c4—1284       | -3272.321475 | 124.7 |
| 1851 | 14v-06-OmnicapOh—fe2c4—2262   | -3272.32135  | 124.8 |
| 1852 | 14v-04-HepPr—fe2c4—1399       | -3272.321344 | 124.8 |
| 1853 | 14v-02-BicapHexAnPr—fe2c4—507 | -3272.321289 | 124.8 |
| 1854 | 14v-04-HepPr—fe2c4—1266       | -3272.321265 | 124.9 |
| 1855 | 14v-03-BicapHexPr—fe2c4—1074  | -3272.321167 | 124.9 |
| 1856 | 14v-05-HepAnPr—fe2c4—1703     | -3272.321135 | 124.9 |
| 1857 | 14v-02-BicapHexAnPr—fe2c4—640 | -3272.321115 | 124.9 |
| 1858 | 14v-05-HepAnPr—fe2c4—1861     | -3272.321059 | 125.0 |
| 1859 | 14v-05-HepAnPr—fe2c4—1801     | -3272.321024 | 125.0 |
| 1860 | 14v-04-HepPr—fe2c4—1551       | -3272.320903 | 125.1 |
| 1861 | 14v-04-HepPr—fe2c4—1579       | -3272.320802 | 125.1 |
| 1862 | 14v-06-OmnicapOh—fe2c4—2228   | -3272.320727 | 125.2 |
| 1863 | 14v-06-OmnicapOh—fe2c4—2141   | -3272.320604 | 125.3 |
| 1864 | 14v-06-OmnicapOh—fe2c4—2267   | -3272.320341 | 125.4 |
| 1865 | 14v-02-BicapHexAnPr—fe2c4—747 | -3272.320235 | 125.5 |
| 1866 | 14v-05-HepAnPr—fe2c4—1785     | -3272.320136 | 125.6 |
| 1867 | 14v-02-BicapHexAnPr—fe2c4—768 | -3272.319934 | 125.7 |
| 1868 | 14v-04-HepPr—fe2c4—1359       | -3272.319901 | 125.7 |
| 1869 | 14v-06-OmnicapOh—fe2c4—2220   | -3272.319832 | 125.8 |
| 1870 | 14v-05-HepAnPr—fe2c4—1862     | -3272.319753 | 125.8 |
| 1871 | 14v-01-OmnicapCube—fe2c4—109  | -3272.319731 | 125.8 |
| 1872 | 14v-04-HepPr—fe2c4—1550       | -3272.319371 | 126.0 |
| 1873 | 14v-02-BicapHexAnPr—fe2c4—548 | -3272.319353 | 126.1 |
| 1874 | 14v-03-BicapHexPr—fe2c4—1105  | -3272.319178 | 126.2 |
| 1875 | 14v-05-HepAnPr—fe2c4—1879     | -3272.319169 | 126.2 |
| 1876 | 14v-03-BicapHexPr—fe2c4—1132  | -3272.319162 | 126.2 |
| 1877 | 14v-02-BicapHexAnPr—fe2c4—558 | -3272.319135 | 126.2 |
| 1878 | 14v-05-HepAnPr—fe2c4—1804     | -3272.319084 | 126.2 |
| 1879 | 14v-05-HepAnPr—fe2c4—1837     | -3272.319035 | 126.3 |
| 1880 | 14v-05-HepAnPr—fe2c4—1796     | -3272.318959 | 126.3 |
| 1881 | 14v-04-HepPr—fe2c4—1438       | -3272.318808 | 126.4 |
| 1882 | 14v-03-BicapHexPr—fe2c4—960   | -3272.318715 | 126.5 |
| 1883 | 14v-05-HepAnPr—fe2c4—1712     | -3272.318542 | 126.6 |
| 1884 | 14v-06-OmnicapOh—fe2c4—2072   | -3272.318364 | 126.7 |

|      |                               |              |       |
|------|-------------------------------|--------------|-------|
| 1885 | 14v-01-OmnicapCube—fe2c4—116  | -3272.318245 | 126.8 |
| 1886 | 14v-02-BicapHexAnPr—fe2c4—506 | -3272.318162 | 126.8 |
| 1887 | 14v-01-OmnicapCube—fe2c4—20   | -3272.318134 | 126.8 |
| 1888 | 14v-05-HepAnPr—fe2c4—1797     | -3272.318084 | 126.9 |
| 1889 | 14v-05-HepAnPr—fe2c4—1647     | -3272.317792 | 127.0 |
| 1890 | 14v-05-HepAnPr—fe2c4—1693     | -3272.317753 | 127.1 |
| 1891 | 14v-05-HepAnPr—fe2c4—1820     | -3272.317733 | 127.1 |
| 1892 | 14v-04-HepPr—fe2c4—1583       | -3272.317635 | 127.1 |
| 1893 | 14v-06-OmnicapOh—fe2c4—2282   | -3272.317465 | 127.2 |
| 1894 | 14v-04-HepPr—fe2c4—1309       | -3272.317349 | 127.3 |
| 1895 | 14v-05-HepAnPr—fe2c4—1807     | -3272.317292 | 127.3 |
| 1896 | 14v-04-HepPr—fe2c4—1466       | -3272.317248 | 127.4 |
| 1897 | 14v-05-HepAnPr—fe2c4—1860     | -3272.317115 | 127.5 |
| 1898 | 14v-03-BicapHexPr—fe2c4—1079  | -3272.317035 | 127.5 |
| 1899 | 14v-02-BicapHexAnPr—fe2c4—663 | -3272.316945 | 127.6 |
| 1900 | 14v-05-HepAnPr—fe2c4—1613     | -3272.316931 | 127.6 |
| 1901 | 14v-04-HepPr—fe2c4—1422       | -3272.316889 | 127.6 |
| 1902 | 14v-03-BicapHexPr—fe2c4—959   | -3272.316516 | 127.8 |
| 1903 | 14v-05-HepAnPr—fe2c4—1671     | -3272.31635  | 127.9 |
| 1904 | 14v-05-HepAnPr—fe2c4—1628     | -3272.316096 | 128.1 |
| 1905 | 14v-06-OmnicapOh—fe2c4—1948   | -3272.316089 | 128.1 |
| 1906 | 14v-06-OmnicapOh—fe2c4—2128   | -3272.316081 | 128.1 |
| 1907 | 14v-05-HepAnPr—fe2c4—1648     | -3272.315802 | 128.3 |
| 1908 | 14v-04-HepPr—fe2c4—1541       | -3272.315511 | 128.5 |
| 1909 | 14v-05-HepAnPr—fe2c4—1684     | -3272.315465 | 128.5 |
| 1910 | 14v-05-HepAnPr—fe2c4—1691     | -3272.315333 | 128.6 |
| 1911 | 14v-04-HepPr—fe2c4—1485       | -3272.315247 | 128.6 |
| 1912 | 14v-05-HepAnPr—fe2c4—1739     | -3272.31521  | 128.7 |
| 1913 | 14v-04-HepPr—fe2c4—1354       | -3272.315196 | 128.7 |
| 1914 | 14v-01-OmnicapCube—fe2c4—216  | -3272.315158 | 128.7 |
| 1915 | 14v-06-OmnicapOh—fe2c4—2169   | -3272.31505  | 128.8 |
| 1916 | 14v-05-HepAnPr—fe2c4—1689     | -3272.314919 | 128.8 |
| 1917 | 14v-05-HepAnPr—fe2c4—1908     | -3272.314881 | 128.9 |
| 1918 | 14v-06-OmnicapOh—fe2c4—2077   | -3272.31485  | 128.9 |
| 1919 | 14v-05-HepAnPr—fe2c4—1658     | -3272.314609 | 129.0 |
| 1920 | 14v-05-HepAnPr—fe2c4—1851     | -3272.31447  | 129.1 |
| 1921 | 14v-05-HepAnPr—fe2c4—1710     | -3272.314285 | 129.2 |
| 1922 | 14v-05-HepAnPr—fe2c4—1622     | -3272.314243 | 129.3 |
| 1923 | 14v-05-HepAnPr—fe2c4—1886     | -3272.314142 | 129.3 |
| 1924 | 14v-04-HepPr—fe2c4—1462       | -3272.313799 | 129.5 |
| 1925 | 14v-06-OmnicapOh—fe2c4—2291   | -3272.313718 | 129.6 |
| 1926 | 14v-04-HepPr—fe2c4—1327       | -3272.313706 | 129.6 |
| 1927 | 14v-04-HepPr—fe2c4—1256       | -3272.313634 | 129.6 |
| 1928 | 14v-01-OmnicapCube—fe2c4—140  | -3272.313574 | 129.7 |
| 1929 | 14v-06-OmnicapOh—fe2c4—2280   | -3272.313408 | 129.8 |
| 1930 | 14v-04-HepPr—fe2c4—1328       | -3272.313368 | 129.8 |
| 1931 | 14v-06-OmnicapOh—fe2c4—2009   | -3272.313317 | 129.8 |
| 1932 | 14v-05-HepAnPr—fe2c4—1788     | -3272.313141 | 130.0 |
| 1933 | 14v-06-OmnicapOh—fe2c4—1982   | -3272.313038 | 130.0 |
| 1934 | 14v-05-HepAnPr—fe2c4—1636     | -3272.313002 | 130.0 |
| 1935 | 14v-02-BicapHexAnPr—fe2c4—496 | -3272.312993 | 130.0 |

|      |                                 |              |       |
|------|---------------------------------|--------------|-------|
| 1936 | 14v-04-HepPr--fe2c4--1556       | -3272.31291  | 130.1 |
| 1937 | 14v-05-HepAnPr--fe2c4--1835     | -3272.312746 | 130.2 |
| 1938 | 14v-05-HepAnPr--fe2c4--1891     | -3272.312648 | 130.3 |
| 1939 | 14v-05-HepAnPr--fe2c4--1753     | -3272.312473 | 130.4 |
| 1940 | 14v-05-HepAnPr--fe2c4--1680     | -3272.312353 | 130.4 |
| 1941 | 14v-05-HepAnPr--fe2c4--1888     | -3272.312165 | 130.6 |
| 1942 | 14v-01-OmnicapCube--fe2c4--87   | -3272.311963 | 130.7 |
| 1943 | 14v-04-HepPr--fe2c4--1489       | -3272.311713 | 130.8 |
| 1944 | 14v-03-BicapHexPr--fe2c4--940   | -3272.311503 | 131.0 |
| 1945 | 14v-05-HepAnPr--fe2c4--1794     | -3272.3115   | 131.0 |
| 1946 | 14v-05-HepAnPr--fe2c4--1617     | -3272.311327 | 131.1 |
| 1947 | 14v-05-HepAnPr--fe2c4--1887     | -3272.311245 | 131.1 |
| 1948 | 14v-01-OmnicapCube--fe2c4--129  | -3272.311195 | 131.2 |
| 1949 | 14v-01-OmnicapCube--fe2c4--261  | -3272.310951 | 131.3 |
| 1950 | 14v-04-HepPr--fe2c4--1325       | -3272.310429 | 131.7 |
| 1951 | 14v-05-HepAnPr--fe2c4--1919     | -3272.310426 | 131.7 |
| 1952 | 14v-05-HepAnPr--fe2c4--1907     | -3272.310421 | 131.7 |
| 1953 | 14v-01-OmnicapCube--fe2c4--134  | -3272.310225 | 131.8 |
| 1954 | 14v-04-HepPr--fe2c4--1369       | -3272.310203 | 131.8 |
| 1955 | 14v-05-HepAnPr--fe2c4--1631     | -3272.310175 | 131.8 |
| 1956 | 14v-02-BicapHexAnPr--fe2c4--749 | -3272.310107 | 131.9 |
| 1957 | 14v-05-HepAnPr--fe2c4--1667     | -3272.310004 | 131.9 |
| 1958 | 14v-04-HepPr--fe2c4--1409       | -3272.309962 | 131.9 |
| 1959 | 14v-02-BicapHexAnPr--fe2c4--525 | -3272.309704 | 132.1 |
| 1960 | 14v-06-OmnicapOh--fe2c4--1936   | -3272.309508 | 132.2 |
| 1961 | 14v-02-BicapHexAnPr--fe2c4--631 | -3272.309232 | 132.4 |
| 1962 | 14v-04-HepPr--fe2c4--1532       | -3272.308956 | 132.6 |
| 1963 | 14v-05-HepAnPr--fe2c4--1657     | -3272.308847 | 132.6 |
| 1964 | 14v-04-HepPr--fe2c4--1276       | -3272.308416 | 132.9 |
| 1965 | 14v-05-HepAnPr--fe2c4--1690     | -3272.308234 | 133.0 |
| 1966 | 14v-05-HepAnPr--fe2c4--1903     | -3272.308192 | 133.1 |
| 1967 | 14v-05-HepAnPr--fe2c4--1646     | -3272.308105 | 133.1 |
| 1968 | 14v-01-OmnicapCube--fe2c4--133  | -3272.307787 | 133.3 |
| 1969 | 14v-05-HepAnPr--fe2c4--1588     | -3272.307536 | 133.5 |
| 1970 | 14v-01-OmnicapCube--fe2c4--266  | -3272.307503 | 133.5 |
| 1971 | 14v-05-HepAnPr--fe2c4--1916     | -3272.307497 | 133.5 |
| 1972 | 14v-04-HepPr--fe2c4--1287       | -3272.307245 | 133.7 |
| 1973 | 14v-04-HepPr--fe2c4--1547       | -3272.306711 | 134.0 |
| 1974 | 14v-05-HepAnPr--fe2c4--1706     | -3272.30659  | 134.1 |
| 1975 | 14v-05-HepAnPr--fe2c4--1831     | -3272.306543 | 134.1 |
| 1976 | 14v-02-BicapHexAnPr--fe2c4--556 | -3272.306255 | 134.3 |
| 1977 | 14v-04-HepPr--fe2c4--1568       | -3272.306145 | 134.3 |
| 1978 | 14v-06-OmnicapOh--fe2c4--2165   | -3272.305993 | 134.4 |
| 1979 | 14v-01-OmnicapCube--fe2c4--244  | -3272.305972 | 134.5 |
| 1980 | 14v-04-HepPr--fe2c4--1301       | -3272.305855 | 134.5 |
| 1981 | 14v-06-OmnicapOh--fe2c4--2246   | -3272.305643 | 134.7 |
| 1982 | 14v-05-HepAnPr--fe2c4--1633     | -3272.305403 | 134.8 |
| 1983 | 14v-01-OmnicapCube--fe2c4--135  | -3272.305302 | 134.9 |
| 1984 | 14v-04-HepPr--fe2c4--1371       | -3272.305138 | 135.0 |
| 1985 | 14v-04-HepPr--fe2c4--1505       | -3272.305087 | 135.0 |
| 1986 | 14v-05-HepAnPr--fe2c4--1909     | -3272.305003 | 135.1 |

|      |                                |              |       |
|------|--------------------------------|--------------|-------|
| 1987 | 14v-05-HepAnPr--fe2c4--1695    | -3272.304897 | 135.1 |
| 1988 | 14v-04-HepPr--fe2c4--1520      | -3272.304722 | 135.2 |
| 1989 | 14v-04-HepPr--fe2c4--1542      | -3272.304661 | 135.3 |
| 1990 | 14v-04-HepPr--fe2c4--1552      | -3272.30443  | 135.4 |
| 1991 | 14v-04-HepPr--fe2c4--1300      | -3272.304354 | 135.5 |
| 1992 | 14v-04-HepPr--fe2c4--1411      | -3272.304335 | 135.5 |
| 1993 | 14v-04-HepPr--fe2c4--1249      | -3272.304173 | 135.6 |
| 1994 | 14v-04-HepPr--fe2c4--1329      | -3272.303965 | 135.7 |
| 1995 | 14v-05-HepAnPr--fe2c4--1589    | -3272.303859 | 135.8 |
| 1996 | 14v-05-HepAnPr--fe2c4--1606    | -3272.303761 | 135.8 |
| 1997 | 14v-04-HepPr--fe2c4--1521      | -3272.303572 | 136.0 |
| 1998 | 14v-03-BicapHexPr--fe2c4--943  | -3272.303464 | 136.0 |
| 1999 | 14v-05-HepAnPr--fe2c4--1653    | -3272.303311 | 136.1 |
| 2000 | 14v-03-BicapHexPr--fe2c4--1086 | -3272.303163 | 136.2 |
| 2001 | 14v-05-HepAnPr--fe2c4--1910    | -3272.302249 | 136.8 |
| 2002 | 14v-04-HepPr--fe2c4--1356      | -3272.302133 | 136.9 |
| 2003 | 14v-04-HepPr--fe2c4--1546      | -3272.302016 | 136.9 |
| 2004 | 14v-06-OmnicapOh--fe2c4--2252  | -3272.301973 | 137.0 |
| 2005 | 14v-05-HepAnPr--fe2c4--1912    | -3272.301968 | 137.0 |
| 2006 | 14v-04-HepPr--fe2c4--1508      | -3272.30193  | 137.0 |
| 2007 | 14v-05-HepAnPr--fe2c4--1612    | -3272.301792 | 137.1 |
| 2008 | 14v-05-HepAnPr--fe2c4--1682    | -3272.301614 | 137.2 |
| 2009 | 14v-05-HepAnPr--fe2c4--1639    | -3272.301544 | 137.2 |
| 2010 | 14v-04-HepPr--fe2c4--1577      | -3272.301539 | 137.2 |
| 2011 | 14v-04-HepPr--fe2c4--1471      | -3272.301426 | 137.3 |
| 2012 | 14v-05-HepAnPr--fe2c4--1619    | -3272.301053 | 137.5 |
| 2013 | 14v-04-HepPr--fe2c4--1277      | -3272.300979 | 137.6 |
| 2014 | 14v-06-OmnicapOh--fe2c4--1983  | -3272.300792 | 137.7 |
| 2015 | 14v-06-OmnicapOh--fe2c4--2187  | -3272.300117 | 138.1 |
| 2016 | 14v-06-OmnicapOh--fe2c4--2237  | -3272.30007  | 138.2 |
| 2017 | 14v-01-OmnicapCube--fe2c4--112 | -3272.299775 | 138.3 |
| 2018 | 14v-04-HepPr--fe2c4--1493      | -3272.299426 | 138.6 |
| 2019 | 14v-05-HepAnPr--fe2c4--1694    | -3272.298988 | 138.8 |
| 2020 | 14v-04-HepPr--fe2c4--1351      | -3272.298693 | 139.0 |
| 2021 | 14v-06-OmnicapOh--fe2c4--2188  | -3272.298659 | 139.0 |
| 2022 | 14v-05-HepAnPr--fe2c4--1649    | -3272.298616 | 139.1 |
| 2023 | 14v-05-HepAnPr--fe2c4--1726    | -3272.298474 | 139.2 |
| 2024 | 14v-06-OmnicapOh--fe2c4--2266  | -3272.298393 | 139.2 |
| 2025 | 14v-05-HepAnPr--fe2c4--1746    | -3272.298285 | 139.3 |
| 2026 | 14v-06-OmnicapOh--fe2c4--1977  | -3272.29823  | 139.3 |
| 2027 | 14v-05-HepAnPr--fe2c4--1723    | -3272.297836 | 139.6 |
| 2028 | 14v-04-HepPr--fe2c4--1412      | -3272.297789 | 139.6 |
| 2029 | 14v-04-HepPr--fe2c4--1501      | -3272.297653 | 139.7 |
| 2030 | 14v-05-HepAnPr--fe2c4--1789    | -3272.297393 | 139.8 |
| 2031 | 14v-06-OmnicapOh--fe2c4--2226  | -3272.297323 | 139.9 |
| 2032 | 14v-05-HepAnPr--fe2c4--1920    | -3272.297291 | 139.9 |
| 2033 | 14v-06-OmnicapOh--fe2c4--2257  | -3272.297109 | 140.0 |
| 2034 | 14v-05-HepAnPr--fe2c4--1905    | -3272.297094 | 140.0 |
| 2035 | 14v-03-BicapHexPr--fe2c4--937  | -3272.296985 | 140.1 |
| 2036 | 14v-06-OmnicapOh--fe2c4--2258  | -3272.296837 | 140.2 |
| 2037 | 14v-05-HepAnPr--fe2c4--1836    | -3272.296815 | 140.2 |

|      |                               |              |       |
|------|-------------------------------|--------------|-------|
| 2038 | 14v-05-HepAnPr--fe2c4--1641   | -3272.296593 | 140.3 |
| 2039 | 14v-04-HepPr--fe2c4--1557     | -3272.296414 | 140.5 |
| 2040 | 14v-04-HepPr--fe2c4--1297     | -3272.29616  | 140.6 |
| 2041 | 14v-04-HepPr--fe2c4--1384     | -3272.295876 | 140.8 |
| 2042 | 14v-04-HepPr--fe2c4--1289     | -3272.295741 | 140.9 |
| 2043 | 14v-05-HepAnPr--fe2c4--1875   | -3272.29564  | 140.9 |
| 2044 | 14v-04-HepPr--fe2c4--1377     | -3272.295581 | 141.0 |
| 2045 | 14v-05-HepAnPr--fe2c4--1911   | -3272.295572 | 141.0 |
| 2046 | 14v-06-OmnicapOh--fe2c4--2063 | -3272.295543 | 141.0 |
| 2047 | 14v-05-HepAnPr--fe2c4--1744   | -3272.295253 | 141.2 |
| 2048 | 14v-06-OmnicapOh--fe2c4--2269 | -3272.295228 | 141.2 |
| 2049 | 14v-04-HepPr--fe2c4--1385     | -3272.294895 | 141.4 |
| 2050 | 14v-06-OmnicapOh--fe2c4--2028 | -3272.294268 | 141.8 |
| 2051 | 14v-05-HepAnPr--fe2c4--1872   | -3272.294164 | 141.9 |
| 2052 | 14v-06-OmnicapOh--fe2c4--2090 | -3272.294142 | 141.9 |
| 2053 | 14v-05-HepAnPr--fe2c4--1651   | -3272.29379  | 142.1 |
| 2054 | 14v-04-HepPr--fe2c4--1285     | -3272.293563 | 142.2 |
| 2055 | 14v-04-HepPr--fe2c4--1366     | -3272.293509 | 142.3 |
| 2056 | 14v-04-HepPr--fe2c4--1498     | -3272.293312 | 142.4 |
| 2057 | 14v-06-OmnicapOh--fe2c4--2302 | -3272.293243 | 142.4 |
| 2058 | 14v-04-HepPr--fe2c4--1347     | -3272.292889 | 142.7 |
| 2059 | 14v-04-HepPr--fe2c4--1573     | -3272.292879 | 142.7 |
| 2060 | 14v-05-HepAnPr--fe2c4--1758   | -3272.292568 | 142.9 |
| 2061 | 14v-04-HepPr--fe2c4--1361     | -3272.292557 | 142.9 |
| 2062 | 14v-05-HepAnPr--fe2c4--1779   | -3272.292293 | 143.0 |
| 2063 | 14v-05-HepAnPr--fe2c4--1621   | -3272.292172 | 143.1 |
| 2064 | 14v-05-HepAnPr--fe2c4--1874   | -3272.291879 | 143.3 |
| 2065 | 14v-05-HepAnPr--fe2c4--1618   | -3272.291662 | 143.4 |
| 2066 | 14v-05-HepAnPr--fe2c4--1668   | -3272.291472 | 143.6 |
| 2067 | 14v-04-HepPr--fe2c4--1257     | -3272.291435 | 143.6 |
| 2068 | 14v-05-HepAnPr--fe2c4--1664   | -3272.290542 | 144.1 |
| 2069 | 14v-05-HepAnPr--fe2c4--1844   | -3272.290445 | 144.2 |
| 2070 | 14v-06-OmnicapOh--fe2c4--1946 | -3272.290363 | 144.2 |
| 2071 | 14v-05-HepAnPr--fe2c4--1676   | -3272.289842 | 144.6 |
| 2072 | 14v-05-HepAnPr--fe2c4--1766   | -3272.289622 | 144.7 |
| 2073 | 14v-04-HepPr--fe2c4--1280     | -3272.289615 | 144.7 |
| 2074 | 14v-04-HepPr--fe2c4--1389     | -3272.289434 | 144.8 |
| 2075 | 14v-06-OmnicapOh--fe2c4--2231 | -3272.289301 | 144.9 |
| 2076 | 14v-04-HepPr--fe2c4--1435     | -3272.289064 | 145.1 |
| 2077 | 14v-05-HepAnPr--fe2c4--1629   | -3272.288857 | 145.2 |
| 2078 | 14v-05-HepAnPr--fe2c4--1813   | -3272.288803 | 145.2 |
| 2079 | 14v-06-OmnicapOh--fe2c4--2277 | -3272.288192 | 145.6 |
| 2080 | 14v-04-HepPr--fe2c4--1418     | -3272.28767  | 145.9 |
| 2081 | 14v-05-HepAnPr--fe2c4--1890   | -3272.287396 | 146.1 |
| 2082 | 14v-06-OmnicapOh--fe2c4--2093 | -3272.287178 | 146.2 |
| 2083 | 14v-04-HepPr--fe2c4--1548     | -3272.286997 | 146.4 |
| 2084 | 14v-05-HepAnPr--fe2c4--1833   | -3272.286786 | 146.5 |
| 2085 | 14v-05-HepAnPr--fe2c4--1880   | -3272.286589 | 146.6 |
| 2086 | 14v-05-HepAnPr--fe2c4--1899   | -3272.286456 | 146.7 |
| 2087 | 14v-04-HepPr--fe2c4--1403     | -3272.286427 | 146.7 |
| 2088 | 14v-05-HepAnPr--fe2c4--1777   | -3272.286138 | 146.9 |



|      |                                 |              |       |
|------|---------------------------------|--------------|-------|
| 2089 | 14v-05-HepAnPr--fe2c4--1698     | -3272.285986 | 147.0 |
| 2090 | 14v-05-HepAnPr--fe2c4--1656     | -3272.285744 | 147.1 |
| 2091 | 14v-05-HepAnPr--fe2c4--1727     | -3272.285518 | 147.3 |
| 2092 | 14v-05-HepAnPr--fe2c4--1654     | -3272.285467 | 147.3 |
| 2093 | 14v-04-HepPr--fe2c4--1513       | -3272.285168 | 147.5 |
| 2094 | 14v-05-HepAnPr--fe2c4--1885     | -3272.285161 | 147.5 |
| 2095 | 14v-04-HepPr--fe2c4--1473       | -3272.284908 | 147.7 |
| 2096 | 14v-06-OmnicapOh--fe2c4--2283   | -3272.284834 | 147.7 |
| 2097 | 14v-06-OmnicapOh--fe2c4--2172   | -3272.284478 | 147.9 |
| 2098 | 14v-04-HepPr--fe2c4--1584       | -3272.284274 | 148.1 |
| 2099 | 14v-04-HepPr--fe2c4--1560       | -3272.284266 | 148.1 |
| 2100 | 14v-02-BicapHexAnPr--fe2c4--510 | -3272.284219 | 148.1 |
| 2101 | 14v-05-HepAnPr--fe2c4--1740     | -3272.284032 | 148.2 |
| 2102 | 14v-04-HepPr--fe2c4--1461       | -3272.283597 | 148.5 |
| 2103 | 14v-05-HepAnPr--fe2c4--1672     | -3272.283565 | 148.5 |
| 2104 | 14v-05-HepAnPr--fe2c4--1661     | -3272.283263 | 148.7 |
| 2105 | 14v-04-HepPr--fe2c4--1464       | -3272.28326  | 148.7 |
| 2106 | 14v-05-HepAnPr--fe2c4--1904     | -3272.282991 | 148.9 |
| 2107 | 14v-05-HepAnPr--fe2c4--1591     | -3272.282883 | 148.9 |
| 2108 | 14v-04-HepPr--fe2c4--1407       | -3272.282508 | 149.2 |
| 2109 | 14v-05-HepAnPr--fe2c4--1906     | -3272.282398 | 149.2 |
| 2110 | 14v-06-OmnicapOh--fe2c4--2088   | -3272.282072 | 149.5 |
| 2111 | 14v-06-OmnicapOh--fe2c4--2200   | -3272.281983 | 149.5 |
| 2112 | 14v-05-HepAnPr--fe2c4--1765     | -3272.281937 | 149.5 |
| 2113 | 14v-04-HepPr--fe2c4--1326       | -3272.281833 | 149.6 |
| 2114 | 14v-05-HepAnPr--fe2c4--1624     | -3272.281239 | 150.0 |
| 2115 | 14v-04-HepPr--fe2c4--1251       | -3272.280538 | 150.4 |
| 2116 | 14v-05-HepAnPr--fe2c4--1708     | -3272.280464 | 150.5 |
| 2117 | 14v-05-HepAnPr--fe2c4--1913     | -3272.280265 | 150.6 |
| 2118 | 14v-04-HepPr--fe2c4--1578       | -3272.280208 | 150.6 |
| 2119 | 14v-06-OmnicapOh--fe2c4--2170   | -3272.280154 | 150.7 |
| 2120 | 14v-04-HepPr--fe2c4--1355       | -3272.280101 | 150.7 |
| 2121 | 14v-04-HepPr--fe2c4--1372       | -3272.280024 | 150.7 |
| 2122 | 14v-04-HepPr--fe2c4--1424       | -3272.279891 | 150.8 |
| 2123 | 14v-04-HepPr--fe2c4--1318       | -3272.279885 | 150.8 |
| 2124 | 14v-04-HepPr--fe2c4--1391       | -3272.279806 | 150.9 |
| 2125 | 14v-04-HepPr--fe2c4--1336       | -3272.2797   | 150.9 |
| 2126 | 14v-04-HepPr--fe2c4--1404       | -3272.279649 | 151.0 |
| 2127 | 14v-04-HepPr--fe2c4--1364       | -3272.279574 | 151.0 |
| 2128 | 14v-04-HepPr--fe2c4--1431       | -3272.279566 | 151.0 |
| 2129 | 14v-05-HepAnPr--fe2c4--1709     | -3272.279385 | 151.1 |
| 2130 | 14v-02-BicapHexAnPr--fe2c4--497 | -3272.279357 | 151.2 |
| 2131 | 14v-04-HepPr--fe2c4--1574       | -3272.279219 | 151.2 |
| 2132 | 14v-04-HepPr--fe2c4--1474       | -3272.278887 | 151.4 |
| 2133 | 14v-05-HepAnPr--fe2c4--1761     | -3272.278835 | 151.5 |
| 2134 | 14v-05-HepAnPr--fe2c4--1660     | -3272.278769 | 151.5 |
| 2135 | 14v-04-HepPr--fe2c4--1263       | -3272.278746 | 151.5 |
| 2136 | 14v-06-OmnicapOh--fe2c4--2173   | -3272.278361 | 151.8 |
| 2137 | 14v-05-HepAnPr--fe2c4--1721     | -3272.27832  | 151.8 |
| 2138 | 14v-05-HepAnPr--fe2c4--1915     | -3272.27814  | 151.9 |
| 2139 | 14v-04-HepPr--fe2c4--1255       | -3272.278099 | 151.9 |

|      |                               |              |       |
|------|-------------------------------|--------------|-------|
| 2140 | 14v-04-HepPr--fe2c4--1514     | -3272.27796  | 152.0 |
| 2141 | 14v-06-OmnicapOh--fe2c4--2197 | -3272.27764  | 152.2 |
| 2142 | 14v-05-HepAnPr--fe2c4--1607   | -3272.276722 | 152.8 |
| 2143 | 14v-05-HepAnPr--fe2c4--1854   | -3272.27575  | 153.4 |
| 2144 | 14v-05-HepAnPr--fe2c4--1768   | -3272.275285 | 153.7 |
| 2145 | 14v-06-OmnicapOh--fe2c4--2076 | -3272.275249 | 153.7 |
| 2146 | 14v-05-HepAnPr--fe2c4--1655   | -3272.275246 | 153.7 |
| 2147 | 14v-04-HepPr--fe2c4--1506     | -3272.274992 | 153.9 |
| 2148 | 14v-05-HepAnPr--fe2c4--1595   | -3272.274917 | 153.9 |
| 2149 | 14v-05-HepAnPr--fe2c4--1615   | -3272.274747 | 154.0 |
| 2150 | 14v-04-HepPr--fe2c4--1491     | -3272.274383 | 154.3 |
| 2151 | 14v-04-HepPr--fe2c4--1502     | -3272.274138 | 154.4 |
| 2152 | 14v-05-HepAnPr--fe2c4--1774   | -3272.272946 | 155.2 |
| 2153 | 14v-04-HepPr--fe2c4--1269     | -3272.272697 | 155.3 |
| 2154 | 14v-06-OmnicapOh--fe2c4--2074 | -3272.272455 | 155.5 |
| 2155 | 14v-05-HepAnPr--fe2c4--1883   | -3272.272276 | 155.6 |
| 2156 | 14v-05-HepAnPr--fe2c4--1605   | -3272.272199 | 155.6 |
| 2157 | 14v-04-HepPr--fe2c4--1459     | -3272.271801 | 155.9 |
| 2158 | 14v-03-BicapHexPr--fe2c4--942 | -3272.271583 | 156.0 |
| 2159 | 14v-04-HepPr--fe2c4--1308     | -3272.271069 | 156.4 |
| 2160 | 14v-04-HepPr--fe2c4--1420     | -3272.270995 | 156.4 |
| 2161 | 14v-04-HepPr--fe2c4--1271     | -3272.270932 | 156.4 |
| 2162 | 14v-04-HepPr--fe2c4--1302     | -3272.270789 | 156.5 |
| 2163 | 14v-04-HepPr--fe2c4--1307     | -3272.270658 | 156.6 |
| 2164 | 14v-06-OmnicapOh--fe2c4--2251 | -3272.269922 | 157.1 |
| 2165 | 14v-04-HepPr--fe2c4--1363     | -3272.269679 | 157.2 |
| 2166 | 14v-04-HepPr--fe2c4--1476     | -3272.269005 | 157.6 |
| 2167 | 14v-04-HepPr--fe2c4--1402     | -3272.268896 | 157.7 |
| 2168 | 14v-04-HepPr--fe2c4--1504     | -3272.268854 | 157.7 |
| 2169 | 14v-05-HepAnPr--fe2c4--1763   | -3272.268676 | 157.9 |
| 2170 | 14v-05-HepAnPr--fe2c4--1687   | -3272.268452 | 158.0 |
| 2171 | 14v-05-HepAnPr--fe2c4--1642   | -3272.268427 | 158.0 |
| 2172 | 14v-04-HepPr--fe2c4--1357     | -3272.268153 | 158.2 |
| 2173 | 14v-05-HepAnPr--fe2c4--1644   | -3272.267755 | 158.4 |
| 2174 | 14v-03-BicapHexPr--fe2c4--927 | -3272.267098 | 158.8 |
| 2175 | 14v-05-HepAnPr--fe2c4--1759   | -3272.266885 | 159.0 |
| 2176 | 14v-05-HepAnPr--fe2c4--1594   | -3272.266585 | 159.2 |
| 2177 | 14v-05-HepAnPr--fe2c4--1616   | -3272.26559  | 159.8 |
| 2178 | 14v-05-HepAnPr--fe2c4--1645   | -3272.265421 | 159.9 |
| 2179 | 14v-04-HepPr--fe2c4--1313     | -3272.26495  | 160.2 |
| 2180 | 14v-05-HepAnPr--fe2c4--1892   | -3272.264435 | 160.5 |
| 2181 | 14v-05-HepAnPr--fe2c4--1893   | -3272.26438  | 160.6 |
| 2182 | 14v-04-HepPr--fe2c4--1442     | -3272.264174 | 160.7 |
| 2183 | 14v-05-HepAnPr--fe2c4--1700   | -3272.263589 | 161.0 |
| 2184 | 14v-06-OmnicapOh--fe2c4--1981 | -3272.263101 | 161.4 |
| 2185 | 14v-04-HepPr--fe2c4--1454     | -3272.262748 | 161.6 |
| 2186 | 14v-06-OmnicapOh--fe2c4--2278 | -3272.262468 | 161.8 |
| 2187 | 14v-05-HepAnPr--fe2c4--1876   | -3272.262072 | 162.0 |
| 2188 | 14v-04-HepPr--fe2c4--1571     | -3272.262054 | 162.0 |
| 2189 | 14v-06-OmnicapOh--fe2c4--2250 | -3272.261769 | 162.2 |
| 2190 | 14v-05-HepAnPr--fe2c4--1632   | -3272.261366 | 162.4 |

|      |                              |              |       |
|------|------------------------------|--------------|-------|
| 2191 | 14v-05-HepAnPr--fe2c4--1894  | -3272.260923 | 162.7 |
| 2192 | 14v-05-HepAnPr--fe2c4--1751  | -3272.260895 | 162.7 |
| 2193 | 14v-05-HepAnPr--fe2c4--1760  | -3272.260617 | 162.9 |
| 2194 | 14v-05-HepAnPr--fe2c4--1675  | -3272.259815 | 163.4 |
| 2195 | 14v-05-HepAnPr--fe2c4--1669  | -3272.259485 | 163.6 |
| 2196 | 14v-04-HepPr--fe2c4--1310    | -3272.259053 | 163.9 |
| 2197 | 14v-05-HepAnPr--fe2c4--1793  | -3272.258934 | 164.0 |
| 2198 | 14v-05-HepAnPr--fe2c4--1593  | -3272.25879  | 164.1 |
| 2199 | 14v-05-HepAnPr--fe2c4--1662  | -3272.258579 | 164.2 |
| 2200 | 14v-04-HepPr--fe2c4--1500    | -3272.257661 | 164.8 |
| 2201 | 14v-05-HepAnPr--fe2c4--1853  | -3272.257592 | 164.8 |
| 2202 | 14v-04-HepPr--fe2c4--1534    | -3272.257036 | 165.2 |
| 2203 | 14v-04-HepPr--fe2c4--1337    | -3272.255918 | 165.9 |
| 2204 | 14v-05-HepAnPr--fe2c4--1585  | -3272.255502 | 166.1 |
| 2205 | 14v-04-HepPr--fe2c4--1339    | -3272.255447 | 166.2 |
| 2206 | 14v-04-HepPr--fe2c4--1312    | -3272.255445 | 166.2 |
| 2207 | 14v-05-HepAnPr--fe2c4--1747  | -3272.255274 | 166.3 |
| 2208 | 14v-05-HepAnPr--fe2c4--1697  | -3272.255009 | 166.4 |
| 2209 | 14v-05-HepAnPr--fe2c4--1776  | -3272.254783 | 166.6 |
| 2210 | 14v-04-HepPr--fe2c4--1290    | -3272.254729 | 166.6 |
| 2211 | 14v-04-HepPr--fe2c4--1332    | -3272.254147 | 167.0 |
| 2212 | 14v-04-HepPr--fe2c4--1453    | -3272.25402  | 167.1 |
| 2213 | 14v-05-HepAnPr--fe2c4--1741  | -3272.253536 | 167.4 |
| 2214 | 14v-05-HepAnPr--fe2c4--1889  | -3272.253016 | 167.7 |
| 2215 | 14v-04-HepPr--fe2c4--1446    | -3272.252514 | 168.0 |
| 2216 | 14v-04-HepPr--fe2c4--1401    | -3272.252388 | 168.1 |
| 2217 | 14v-05-HepAnPr--fe2c4--1731  | -3272.252221 | 168.2 |
| 2218 | 14v-05-HepAnPr--fe2c4--1600  | -3272.252005 | 168.3 |
| 2219 | 14v-04-HepPr--fe2c4--1388    | -3272.251766 | 168.5 |
| 2220 | 14v-06-OmicapOh--fe2c4--2297 | -3272.251676 | 168.5 |
| 2221 | 14v-04-HepPr--fe2c4--1349    | -3272.251053 | 168.9 |
| 2222 | 14v-04-HepPr--fe2c4--1317    | -3272.250564 | 169.2 |
| 2223 | 14v-05-HepAnPr--fe2c4--1614  | -3272.250333 | 169.4 |
| 2224 | 14v-05-HepAnPr--fe2c4--1724  | -3272.249352 | 170.0 |
| 2225 | 14v-04-HepPr--fe2c4--1335    | -3272.248455 | 170.5 |
| 2226 | 14v-04-HepPr--fe2c4--1362    | -3272.247941 | 170.9 |
| 2227 | 14v-05-HepAnPr--fe2c4--1587  | -3272.247748 | 171.0 |
| 2228 | 14v-05-HepAnPr--fe2c4--1707  | -3272.247056 | 171.4 |
| 2229 | 14v-04-HepPr--fe2c4--1425    | -3272.246549 | 171.7 |
| 2230 | 14v-05-HepAnPr--fe2c4--1602  | -3272.246243 | 171.9 |
| 2231 | 14v-04-HepPr--fe2c4--1304    | -3272.246136 | 172.0 |
| 2232 | 14v-04-HepPr--fe2c4--1306    | -3272.24465  | 172.9 |
| 2233 | 14v-05-HepAnPr--fe2c4--1873  | -3272.24396  | 173.4 |
| 2234 | 14v-04-HepPr--fe2c4--1386    | -3272.243345 | 173.8 |
| 2235 | 14v-05-HepAnPr--fe2c4--1839  | -3272.242957 | 174.0 |
| 2236 | 14v-05-HepAnPr--fe2c4--1742  | -3272.241931 | 174.6 |
| 2237 | 14v-04-HepPr--fe2c4--1352    | -3272.240974 | 175.2 |
| 2238 | 14v-05-HepAnPr--fe2c4--1666  | -3272.24053  | 175.5 |
| 2239 | 14v-05-HepAnPr--fe2c4--1652  | -3272.239759 | 176.0 |
| 2240 | 14v-05-HepAnPr--fe2c4--1677  | -3272.239534 | 176.1 |
| 2241 | 14v-05-HepAnPr--fe2c4--1601  | -3272.237287 | 177.6 |

|      |                              |              |       |
|------|------------------------------|--------------|-------|
| 2242 | 14v-05-HepAnPr--fe2c4--1752  | -3272.236938 | 177.8 |
| 2243 | 14v-05-HepAnPr--fe2c4--1917  | -3272.2347   | 179.2 |
| 2244 | 14v-04-HepPr--fe2c4--1344    | -3272.234405 | 179.4 |
| 2245 | 14v-04-HepPr--fe2c4--1387    | -3272.234283 | 179.4 |
| 2246 | 14v-05-HepAnPr--fe2c4--1745  | -3272.23408  | 179.6 |
| 2247 | 14v-05-HepAnPr--fe2c4--1750  | -3272.233971 | 179.6 |
| 2248 | 14v-04-HepPr--fe2c4--1373    | -3272.233607 | 179.9 |
| 2249 | 14v-05-HepAnPr--fe2c4--1598  | -3272.233409 | 180.0 |
| 2250 | 14v-05-HepAnPr--fe2c4--1838  | -3272.232889 | 180.3 |
| 2251 | 14v-05-HepAnPr--fe2c4--1733  | -3272.232366 | 180.6 |
| 2252 | 14v-05-HepAnPr--fe2c4--1597  | -3272.232312 | 180.7 |
| 2253 | 14v-04-HepPr--fe2c4--1450    | -3272.232309 | 180.7 |
| 2254 | 14v-05-HepAnPr--fe2c4--1592  | -3272.231698 | 181.1 |
| 2255 | 14v-04-HepPr--fe2c4--1315    | -3272.23136  | 181.3 |
| 2256 | 14v-05-HepAnPr--fe2c4--1699  | -3272.230846 | 181.6 |
| 2257 | 14v-04-HepPr--fe2c4--1348    | -3272.230614 | 181.7 |
| 2258 | 14v-05-HepAnPr--fe2c4--1725  | -3272.230415 | 181.9 |
| 2259 | 14v-04-HepPr--fe2c4--1378    | -3272.230261 | 182.0 |
| 2260 | 14v-04-HepPr--fe2c4--1365    | -3272.230236 | 182.0 |
| 2261 | 14v-05-HepAnPr--fe2c4--1625  | -3272.228273 | 183.2 |
| 2262 | 14v-05-HepAnPr--fe2c4--1756  | -3272.226347 | 184.4 |
| 2263 | 14v-04-HepPr--fe2c4--1452    | -3272.225739 | 184.8 |
| 2264 | 14v-05-HepAnPr--fe2c4--1775  | -3272.224059 | 185.9 |
| 2265 | 14v-04-HepPr--fe2c4--1342    | -3272.223556 | 186.2 |
| 2266 | 14v-05-HepAnPr--fe2c4--1884  | -3272.222513 | 186.8 |
| 2267 | 14v-05-HepAnPr--fe2c4--1627  | -3272.221585 | 187.4 |
| 2268 | 14v-05-HepAnPr--fe2c4--1743  | -3272.221278 | 187.6 |
| 2269 | 14v-04-HepPr--fe2c4--1482    | -3272.22118  | 187.7 |
| 2270 | 14v-04-HepPr--fe2c4--1330    | -3272.221039 | 187.7 |
| 2271 | 14v-05-HepAnPr--fe2c4--1732  | -3272.22057  | 188.0 |
| 2272 | 14v-05-HepAnPr--fe2c4--1769  | -3272.219778 | 188.5 |
| 2273 | 14v-05-HepAnPr--fe2c4--1734  | -3272.219519 | 188.7 |
| 2274 | 14v-05-HepAnPr--fe2c4--1590  | -3272.21581  | 191.0 |
| 2275 | 14v-05-HepAnPr--fe2c4--1914  | -3272.214798 | 191.7 |
| 2276 | 14v-06-OmicapOh--fe2c4--2279 | -3272.214317 | 192.0 |
| 2277 | 14v-05-HepAnPr--fe2c4--1586  | -3272.213655 | 192.4 |
| 2278 | 14v-04-HepPr--fe2c4--1305    | -3272.212901 | 192.9 |
| 2279 | 14v-05-HepAnPr--fe2c4--1898  | -3272.212895 | 192.9 |
| 2280 | 14v-05-HepAnPr--fe2c4--1736  | -3272.210914 | 194.1 |
| 2281 | 14v-04-HepPr--fe2c4--1346    | -3272.210264 | 194.5 |
| 2282 | 14v-04-HepPr--fe2c4--1370    | -3272.205528 | 197.5 |
| 2283 | 14v-05-HepAnPr--fe2c4--1901  | -3272.203477 | 198.8 |
| 2284 | 14v-04-HepPr--fe2c4--1260    | -3272.199593 | 201.2 |
| 2285 | 14v-05-HepAnPr--fe2c4--1902  | -3272.199108 | 201.5 |
| 2286 | 14v-04-HepPr--fe2c4--1392    | -3272.198525 | 201.9 |
| 2287 | 14v-05-HepAnPr--fe2c4--1773  | -3272.197599 | 202.5 |
| 2288 | 14v-05-HepAnPr--fe2c4--1754  | -3272.19699  | 202.8 |
| 2289 | 14v-05-HepAnPr--fe2c4--1735  | -3272.19061  | 206.8 |
| 2290 | 14v-05-HepAnPr--fe2c4--1771  | -3272.190248 | 207.1 |
| 2291 | 14v-05-HepAnPr--fe2c4--1729  | -3272.190134 | 207.1 |
| 2292 | 14v-04-HepPr--fe2c4--1380    | -3272.190066 | 207.2 |

|      |                             |              |       |
|------|-----------------------------|--------------|-------|
| 2293 | 14v-05-HepAnPr--fe2c4--1730 | -3272.189064 | 207.8 |
| 2294 | 14v-05-HepAnPr--fe2c4--1737 | -3272.186508 | 209.4 |
| 2295 | 14v-05-HepAnPr--fe2c4--1881 | -3272.179378 | 213.9 |
| 2296 | 14v-04-HepPr--fe2c4--1368   | -3272.158886 | 226.8 |
| 2297 | 14v-04-HepPr--fe2c4--1499   | -3272.157466 | 227.6 |

Table S6: Distance table for the lowest-lying  $\text{Cp}_2\text{Fe}_2(\text{CCH}_3)_4\text{B}_4\text{H}_4$  optimized structures obtained at the PBE0/def2-TZVP level of theory. Included are the zero-point corrected absolute energies in (a.u.), relative energies in (kcal/mol), symmetry and wiberg bond indecies. The cyclopentadienyls, methyls and hydrogens are omitted for clarity.

|                                                                                                                                                               |          |          |          |          |          |          |  |
|---------------------------------------------------------------------------------------------------------------------------------------------------------------|----------|----------|----------|----------|----------|----------|--|
| 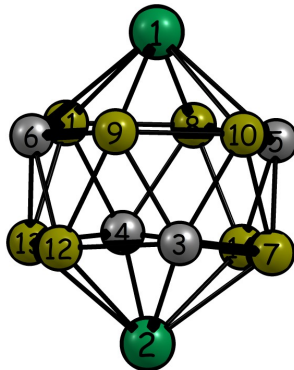 <p>1. -3428.702435 0.0 <math>C_{2v}</math></p> <p>WBI: Fe1-Fe2: 0.0665</p> |          | 1        | 2        | 3        | 4        | 5        |  |
|                                                                                                                                                               | 1 Fe     | 0.000000 |          |          |          |          |  |
|                                                                                                                                                               | 2 Fe     | 4.125298 | 0.000000 |          |          |          |  |
|                                                                                                                                                               | 3 C      | 3.193997 | 2.171706 | 0.000000 |          |          |  |
|                                                                                                                                                               | 4 C      | 3.189290 | 2.173743 | 3.322783 | 0.000000 |          |  |
|                                                                                                                                                               | 5 C      | 2.177392 | 3.191864 | 2.695385 | 2.694614 | 0.000000 |  |
|                                                                                                                                                               | 6 C      | 2.172059 | 3.183997 | 2.696448 | 2.693755 | 3.321407 |  |
|                                                                                                                                                               | 7 B      | 3.318623 | 2.115087 | 1.651190 | 2.917310 | 1.706542 |  |
|                                                                                                                                                               | 8 B      | 2.112577 | 3.314699 | 3.536506 | 1.705840 | 1.650268 |  |
|                                                                                                                                                               | 9 B      | 2.114243 | 3.309077 | 1.703959 | 3.536213 | 2.914647 |  |
|                                                                                                                                                               | 10 B     | 2.116173 | 3.313721 | 1.706972 | 3.535142 | 1.650051 |  |
|                                                                                                                                                               | 11 B     | 2.116012 | 3.309828 | 3.541123 | 1.699401 | 2.917838 |  |
|                                                                                                                                                               | 12 B     | 3.312266 | 2.111540 | 1.654956 | 2.919279 | 3.537297 |  |
|                                                                                                                                                               | 13 B     | 3.309813 | 2.111367 | 2.917396 | 1.656027 | 3.536672 |  |
|                                                                                                                                                               | 14 B     | 3.316824 | 2.114074 | 2.915932 | 1.650846 | 1.706826 |  |
|                                                                                                                                                               |          | 6        | 7        | 8        | 9        | 10       |  |
|                                                                                                                                                               | 6 C      | 0.000000 |          |          |          |          |  |
|                                                                                                                                                               | 7 B      | 3.536187 | 0.000000 |          |          |          |  |
|                                                                                                                                                               | 8 B      | 2.916756 | 2.860579 | 0.000000 |          |          |  |
|                                                                                                                                                               | 9 B      | 1.655451 | 2.858081 | 3.371594 | 0.000000 |          |  |
| 10 B                                                                                                                                                          | 2.917339 | 1.777147 | 2.886205 | 1.737648 | 0.000000 |          |  |
| 11 B                                                                                                                                                          | 1.657767 | 3.636093 | 1.738691 | 2.897109 | 3.376108 |          |  |
| 12 B                                                                                                                                                          | 1.701469 | 2.891824 | 3.635392 | 1.774390 | 2.861465 |          |  |
| 13 B                                                                                                                                                          | 1.698618 | 3.374130 | 2.862403 | 2.858218 | 3.633114 |          |  |
| 14 B                                                                                                                                                          | 3.534520 | 1.739753 | 1.777611 | 3.632310 | 2.859685 |          |  |
|                                                                                                                                                               | 11       | 12       | 13       | 14       |          |          |  |
| 11 B                                                                                                                                                          | 0.000000 |          |          |          |          |          |  |
| 12 B                                                                                                                                                          | 2.863314 | 0.000000 |          |          |          |          |  |
| 13 B                                                                                                                                                          | 1.774078 | 1.738315 | 0.000000 |          |          |          |  |
| 14 B                                                                                                                                                          | 2.857573 | 3.373799 | 2.890701 | 0.000000 |          |          |  |

|  |      |          |          |          |          |          |
|--|------|----------|----------|----------|----------|----------|
|  | 1    | 2        | 3        | 4        | 5        |          |
|  | 1 Fe | 0.000000 |          |          |          |          |
|  | 2 Fe | 4.119196 | 0.000000 |          |          |          |
|  | 3 C  | 3.194444 | 2.162914 | 0.000000 |          |          |
|  | 4 C  | 2.161211 | 3.195020 | 2.687792 | 0.000000 |          |
|  | 5 C  | 3.230148 | 2.117343 | 2.861642 | 3.481611 | 0.000000 |
|  | 6 C  | 2.119184 | 3.229727 | 3.481906 | 2.863529 | 1.677425 |
|  | 7 B  | 2.143763 | 3.324113 | 1.703057 | 2.922399 | 2.814464 |
|  | 8 B  | 2.125614 | 3.261119 | 3.506852 | 1.671544 | 2.765252 |
|  | 9 B  | 2.122153 | 3.315221 | 1.707501 | 1.645656 | 3.568237 |
|  | 10 B | 3.322712 | 2.144859 | 2.923552 | 1.702792 | 2.917275 |
|  | 11 B | 3.315250 | 2.121884 | 1.647001 | 1.708145 | 3.340407 |
|  | 12 B | 3.260535 | 2.126417 | 1.669823 | 3.505678 | 1.656668 |
|  | 13 B | 2.128763 | 3.312448 | 2.801158 | 3.361424 | 1.727291 |
|  | 14 B | 3.312283 | 2.128135 | 3.361930 | 2.801461 | 1.663654 |
|  |      | 6        | 7        | 8        | 9        | 10       |
|  | 6 C  | 0.000000 |          |          |          |          |
|  | 7 B  | 2.916757 | 0.000000 |          |          |          |
|  | 8 B  | 1.657753 | 3.391104 | 0.000000 |          |          |
|  | 9 B  | 3.342001 | 1.736090 | 2.899249 | 0.000000 |          |
|  | 10 B | 2.815674 | 3.676587 | 1.758984 | 2.863905 | 0.000000 |
|  | 11 B | 3.569330 | 2.865160 | 2.846036 | 1.775640 | 1.735436 |
|  | 12 B | 2.764709 | 1.758453 | 3.550513 | 2.844673 | 3.391523 |
|  | 13 B | 1.662407 | 1.727400 | 2.913568 | 2.968328 | 3.656146 |
|  | 14 B | 1.727600 | 3.656144 | 1.765686 | 3.636761 | 1.727727 |
|  |      | 11       | 12       | 13       | 14       |          |
|  | 11 B | 0.000000 |          |          |          |          |
|  | 12 B | 2.898390 | 0.000000 |          |          |          |
|  | 13 B | 3.637124 | 1.765840 | 0.000000 |          |          |
|  | 14 B | 2.967572 | 2.914284 | 2.852194 | 0.000000 |          |

  

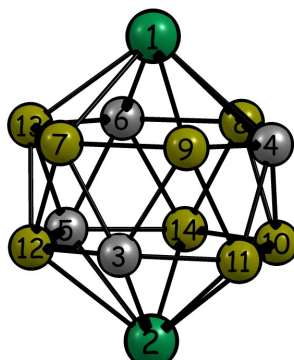

2. -3428.687260 +9.5  $C_2$

WBI: Fe1-Fe2: 0.0611

|                                                                                                                                                             |          |          |          |          |          |          |
|-------------------------------------------------------------------------------------------------------------------------------------------------------------|----------|----------|----------|----------|----------|----------|
| 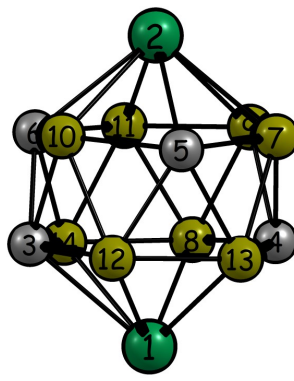 <p>3. -3428.683782 +11.7 <math>C_1</math></p> <p>WBI: Fe1-Fe2: 0.0628</p> | 1        | 2        | 3        | 4        | 5        |          |
|                                                                                                                                                             | 1 Fe     | 0.000000 |          |          |          |          |
|                                                                                                                                                             | 2 Fe     | 4.119417 | 0.000000 |          |          |          |
|                                                                                                                                                             | 3 C      | 2.128974 | 3.222048 | 0.000000 |          |          |
|                                                                                                                                                             | 4 C      | 2.185732 | 3.198953 | 3.327350 | 0.000000 |          |
|                                                                                                                                                             | 5 C      | 3.185348 | 2.145727 | 2.707359 | 2.691578 | 0.000000 |
|                                                                                                                                                             | 6 C      | 3.224978 | 2.126021 | 1.662003 | 3.494915 | 2.850287 |
|                                                                                                                                                             | 7 B      | 3.318181 | 2.122248 | 3.560112 | 1.700605 | 1.653692 |
|                                                                                                                                                             | 8 B      | 2.151181 | 3.293904 | 2.925037 | 1.671591 | 3.524455 |
|                                                                                                                                                             | 9 B      | 3.335402 | 2.154501 | 3.596011 | 1.700741 | 2.921343 |
|                                                                                                                                                             | 10 B     | 3.290721 | 2.083654 | 1.725395 | 3.526664 | 1.651148 |
|                                                                                                                                                             | 11 B     | 3.279512 | 2.164264 | 2.774497 | 2.787935 | 3.350746 |
|                                                                                                                                                             | 12 B     | 2.108272 | 3.299446 | 1.648363 | 2.916637 | 1.701750 |
|                                                                                                                                                             | 13 B     | 2.113649 | 3.310217 | 2.912061 | 1.643979 | 1.715019 |
| 14 B                                                                                                                                                        | 2.112722 | 3.321251 | 1.663542 | 2.933236 | 3.536860 |          |
|                                                                                                                                                             | 6        | 7        | 8        | 9        | 10       |          |
| 6 C                                                                                                                                                         | 0.000000 |          |          |          |          |          |
| 7 B                                                                                                                                                         | 3.346879 | 0.000000 |          |          |          |          |
| 8 B                                                                                                                                                         | 2.808942 | 2.852065 | 0.000000 |          |          |          |
| 9 B                                                                                                                                                         | 2.929406 | 1.732186 | 1.765235 | 0.000000 |          |          |
| 10 B                                                                                                                                                        | 1.658122 | 2.892024 | 3.603052 | 3.388430 | 0.000000 |          |
| 11 B                                                                                                                                                        | 1.665095 | 2.970028 | 1.759412 | 1.737821 | 2.909243 |          |
| 12 B                                                                                                                                                        | 2.778202 | 2.860384 | 3.387459 | 3.656832 | 1.780180 |          |
| 13 B                                                                                                                                                        | 3.565062 | 1.776145 | 2.900958 | 2.860581 | 2.862886 |          |
| 14 B                                                                                                                                                        | 1.733343 | 3.648398 | 1.742934 | 2.905347 | 2.842685 |          |
|                                                                                                                                                             | 11       | 12       | 13       | 14       |          |          |
| 11 B                                                                                                                                                        | 0.000000 |          |          |          |          |          |
| 12 B                                                                                                                                                        | 3.602290 | 0.000000 |          |          |          |          |
| 13 B                                                                                                                                                        | 3.613138 | 1.738479 | 0.000000 |          |          |          |
| 14 B                                                                                                                                                        | 1.768925 | 2.904857 | 3.381817 | 0.000000 |          |          |



|                                                                                                                                                             |          |          |          |          |          |          |
|-------------------------------------------------------------------------------------------------------------------------------------------------------------|----------|----------|----------|----------|----------|----------|
| 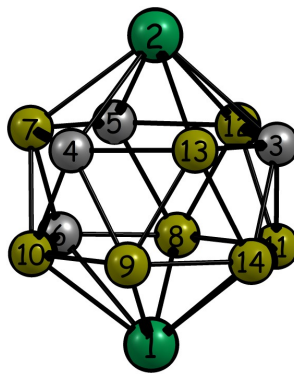 <p>4. -3428.682701 +12.4 <math>C_1</math></p> <p>WBI: Fe1-Fe2: 0.0597</p> | 1        | 2        | 3        | 4        | 5        |          |
|                                                                                                                                                             | 1 Fe     | 0.000000 |          |          |          |          |
|                                                                                                                                                             | 2 Fe     | 4.120898 | 0.000000 |          |          |          |
|                                                                                                                                                             | 3 C      | 3.193952 | 2.164975 | 0.000000 |          |          |
|                                                                                                                                                             | 4 C      | 3.179493 | 2.155865 | 2.863569 | 0.000000 |          |
|                                                                                                                                                             | 5 C      | 3.215069 | 2.127872 | 2.856380 | 2.837142 | 0.000000 |
|                                                                                                                                                             | 6 C      | 2.106693 | 3.243743 | 3.483209 | 2.703415 | 1.674882 |
|                                                                                                                                                             | 7 B      | 3.275124 | 2.112562 | 3.324734 | 1.645736 | 1.655187 |
|                                                                                                                                                             | 8 B      | 2.110255 | 3.331654 | 2.798655 | 3.539323 | 1.737586 |
|                                                                                                                                                             | 9 B      | 2.147467 | 3.333366 | 2.797676 | 1.707805 | 3.585190 |
|                                                                                                                                                             | 10 B     | 2.098273 | 3.322016 | 3.551523 | 1.705731 | 2.780541 |
|                                                                                                                                                             | 11 B     | 2.140965 | 3.340689 | 1.709017 | 3.570357 | 2.818290 |
|                                                                                                                                                             | 12 B     | 3.247883 | 2.150766 | 1.667054 | 3.322660 | 1.663265 |
|                                                                                                                                                             | 13 B     | 3.261691 | 2.139347 | 1.665621 | 1.677275 | 3.319950 |
|                                                                                                                                                             | 14 B     | 2.159406 | 3.340371 | 1.706745 | 2.805069 | 3.594945 |
|                                                                                                                                                             | 6        | 7        | 8        | 9        | 10       |          |
| 6 C                                                                                                                                                         | 0.000000 |          |          |          |          |          |
| 7 B                                                                                                                                                         | 1.725495 | 0.000000 |          |          |          |          |
| 8 B                                                                                                                                                         | 1.664807 | 2.843284 | 0.000000 |          |          |          |
| 9 B                                                                                                                                                         | 2.925888 | 2.864515 | 3.427651 | 0.000000 |          |          |
| 10 B                                                                                                                                                        | 1.644408 | 1.778645 | 2.911679 | 1.735630 | 0.000000 |          |
| 11 B                                                                                                                                                        | 2.920136 | 3.630461 | 1.722076 | 2.988019 | 3.410168 |          |
| 12 B                                                                                                                                                        | 2.766057 | 2.900090 | 1.763435 | 3.619360 | 3.583072 |          |
| 13 B                                                                                                                                                        | 3.530343 | 2.899164 | 3.608266 | 1.758556 | 2.847695 |          |
| 14 B                                                                                                                                                        | 3.385119 | 3.638040 | 2.986636 | 1.722651 | 2.975592 |          |
|                                                                                                                                                             | 11       | 12       | 13       | 14       |          |          |
| 11 B                                                                                                                                                        | 0.000000 |          |          |          |          |          |
| 12 B                                                                                                                                                        | 1.754661 | 0.000000 |          |          |          |          |
| 13 B                                                                                                                                                        | 2.851823 | 2.905408 | 0.000000 |          |          |          |
| 14 B                                                                                                                                                        | 1.738097 | 2.852935 | 1.758888 | 0.000000 |          |          |

|                                                                                                                                                             |          |          |          |          |          |          |
|-------------------------------------------------------------------------------------------------------------------------------------------------------------|----------|----------|----------|----------|----------|----------|
| 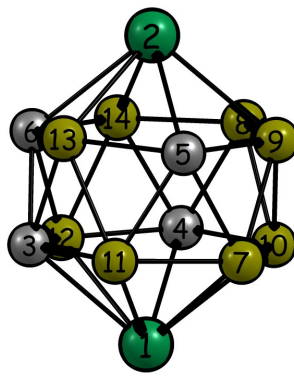 <p>5. -3428.681915 +12.9 <math>C_2</math></p> <p>WBI: Fe1-Fe2: 0.0616</p> | 1        | 2        | 3        | 4        | 5        |          |
|                                                                                                                                                             | 1 Fe     | 0.000000 |          |          |          |          |
|                                                                                                                                                             | 2 Fe     | 4.115555 | 0.000000 |          |          |          |
|                                                                                                                                                             | 3 C      | 2.109120 | 3.211413 | 0.000000 |          |          |
|                                                                                                                                                             | 4 C      | 2.163644 | 3.193158 | 2.854134 | 0.000000 |          |
|                                                                                                                                                             | 5 C      | 3.194443 | 2.163317 | 2.703896 | 3.471778 | 0.000000 |
|                                                                                                                                                             | 6 C      | 3.211558 | 2.107835 | 1.663219 | 2.704104 | 2.852601 |
|                                                                                                                                                             | 7 B      | 2.148147 | 3.336772 | 2.915061 | 2.929974 | 1.712004 |
|                                                                                                                                                             | 8 B      | 3.336424 | 2.148213 | 3.583671 | 1.711502 | 2.929396 |
|                                                                                                                                                             | 9 B      | 3.295903 | 2.173092 | 3.548930 | 2.791249 | 1.674835 |
|                                                                                                                                                             | 10 B     | 2.172079 | 3.296862 | 3.356807 | 1.675146 | 2.792236 |
|                                                                                                                                                             | 11 B     | 2.124297 | 3.301801 | 1.652482 | 3.355815 | 1.693573 |
|                                                                                                                                                             | 12 B     | 2.080996 | 3.288882 | 1.665391 | 1.647758 | 3.521112 |
|                                                                                                                                                             | 13 B     | 3.290863 | 2.080219 | 1.731303 | 3.521550 | 1.647929 |
| 14 B                                                                                                                                                        | 3.301969 | 2.122167 | 2.784253 | 1.693147 | 3.354629 |          |
|                                                                                                                                                             | 6        | 7        | 8        | 9        | 10       |          |
| 6 C                                                                                                                                                         | 0.000000 |          |          |          |          |          |
| 7 B                                                                                                                                                         | 3.582451 | 0.000000 |          |          |          |          |
| 8 B                                                                                                                                                         | 2.915995 | 2.899428 | 0.000000 |          |          |          |
| 9 B                                                                                                                                                         | 3.356032 | 1.763525 | 1.734409 | 0.000000 |          |          |
| 10 B                                                                                                                                                        | 3.549355 | 1.735200 | 1.763849 | 1.760469 | 0.000000 |          |
| 11 B                                                                                                                                                        | 2.782932 | 1.731099 | 3.660987 | 2.851200 | 2.977006 |          |
| 12 B                                                                                                                                                        | 1.730903 | 3.384132 | 2.865671 | 3.607404 | 2.908261 |          |
| 13 B                                                                                                                                                        | 1.663704 | 2.866043 | 3.384495 | 2.908407 | 3.608741 |          |
| 14 B                                                                                                                                                        | 1.653330 | 3.660602 | 1.731372 | 2.975969 | 2.851599 |          |
|                                                                                                                                                             | 11       | 12       | 13       | 14       |          |          |
| 11 B                                                                                                                                                        | 0.000000 |          |          |          |          |          |
| 12 B                                                                                                                                                        | 2.905734 | 0.000000 |          |          |          |          |
| 13 B                                                                                                                                                        | 1.778838 | 2.841727 | 0.000000 |          |          |          |
| 14 B                                                                                                                                                        | 3.621034 | 1.778250 | 2.905081 | 0.000000 |          |          |

|                                                                                                                                                             |          |          |          |          |          |          |
|-------------------------------------------------------------------------------------------------------------------------------------------------------------|----------|----------|----------|----------|----------|----------|
| 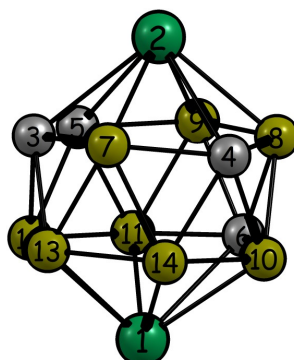 <p>6. -3428.680759 +13.6 <math>C_1</math></p> <p>WBI: Fe1-Fe2: 0.0638</p> | 1        | 2        | 3        | 4        | 5        |          |
|                                                                                                                                                             | 1 Fe     | 0.000000 |          |          |          |          |
|                                                                                                                                                             | 2 Fe     | 4.135718 | 0.000000 |          |          |          |
|                                                                                                                                                             | 3 C      | 3.176925 | 2.158399 | 0.000000 |          |          |
|                                                                                                                                                             | 4 C      | 3.183611 | 2.185639 | 2.876650 | 0.000000 |          |
|                                                                                                                                                             | 5 C      | 3.166109 | 2.193653 | 1.608832 | 3.318342 | 0.000000 |
|                                                                                                                                                             | 6 C      | 2.146018 | 3.219380 | 3.441138 | 2.690414 | 2.695511 |
|                                                                                                                                                             | 7 B      | 3.256136 | 2.125331 | 1.675915 | 1.672335 | 2.866762 |
|                                                                                                                                                             | 8 B      | 3.299196 | 2.131637 | 3.323596 | 1.645656 | 2.917140 |
|                                                                                                                                                             | 9 B      | 3.295974 | 2.115696 | 2.830719 | 2.900729 | 1.648189 |
|                                                                                                                                                             | 10 B     | 2.111823 | 3.337344 | 3.545878 | 1.701180 | 3.537773 |
|                                                                                                                                                             | 11 B     | 2.095156 | 3.341002 | 2.769422 | 3.536014 | 1.707844 |
|                                                                                                                                                             | 12 B     | 2.114918 | 3.381888 | 1.721395 | 3.597648 | 1.706165 |
|                                                                                                                                                             | 13 B     | 2.141950 | 3.339218 | 1.708798 | 2.802391 | 2.774721 |
| 14 B                                                                                                                                                        | 2.144529 | 3.342183 | 2.802374 | 1.697860 | 3.561112 |          |
|                                                                                                                                                             | 6        | 7        | 8        | 9        | 10       |          |
| 6 C                                                                                                                                                         | 0.000000 |          |          |          |          |          |
| 7 B                                                                                                                                                         | 3.499469 | 0.000000 |          |          |          |          |
| 8 B                                                                                                                                                         | 1.710620 | 2.883645 | 0.000000 |          |          |          |
| 9 B                                                                                                                                                         | 1.720451 | 3.328605 | 1.732754 | 0.000000 |          |          |
| 10 B                                                                                                                                                        | 1.651857 | 2.842573 | 1.777272 | 2.862602 | 0.000000 |          |
| 11 B                                                                                                                                                        | 1.645427 | 3.587020 | 2.858271 | 1.782110 | 2.894351 |          |
| 12 B                                                                                                                                                        | 2.923847 | 2.867809 | 3.671584 | 2.868875 | 3.417793 |          |
| 13 B                                                                                                                                                        | 3.373410 | 1.763502 | 3.638786 | 3.624193 | 2.972369 |          |
| 14 B                                                                                                                                                        | 2.926317 | 1.761920 | 2.861976 | 3.646116 | 1.736672 |          |
|                                                                                                                                                             | 11       | 12       | 13       | 14       |          |          |
| 11 B                                                                                                                                                        | 0.000000 |          |          |          |          |          |
| 12 B                                                                                                                                                        | 1.726121 | 0.000000 |          |          |          |          |
| 13 B                                                                                                                                                        | 2.963221 | 1.727199 | 0.000000 |          |          |          |
| 14 B                                                                                                                                                        | 3.407602 | 2.988389 | 1.721493 | 0.000000 |          |          |

|  |  |      |          |          |          |          |
|--|--|------|----------|----------|----------|----------|
|  |  | 1    | 2        | 3        | 4        | 5        |
|  |  | 1 Fe | 0.000000 |          |          |          |
|  |  | 2 Fe | 3.799043 | 0.000000 |          |          |
|  |  | 3 C  | 2.140001 | 2.188924 | 0.000000 |          |
|  |  | 4 C  | 3.181709 | 2.025143 | 2.805422 | 0.000000 |
|  |  | 5 C  | 2.077971 | 3.942374 | 3.281584 | 2.916046 |
|  |  | 6 C  | 3.148454 | 3.227082 | 2.688627 | 3.757272 |
|  |  | 7 B  | 2.073026 | 3.336807 | 1.665579 | 3.801837 |
|  |  | 8 B  | 2.193334 | 2.153552 | 1.641965 | 1.574400 |
|  |  | 9 B  | 3.808591 | 2.129166 | 2.875741 | 2.844194 |
|  |  | 10 B | 2.096100 | 4.065559 | 2.931154 | 3.799857 |
|  |  | 11 B | 3.187816 | 3.368097 | 3.366849 | 3.013854 |
|  |  | 12 B | 3.694673 | 2.176127 | 3.260049 | 1.558781 |
|  |  | 13 B | 3.280137 | 2.055260 | 1.688449 | 3.340867 |
|  |  | 14 B | 2.207123 | 3.244753 | 3.001825 | 1.636187 |
|  |  |      | 6        | 7        | 8        | 9        |
|  |  | 6 C  | 0.000000 |          |          |          |
|  |  | 7 B  | 1.696988 | 0.000000 |          |          |
|  |  | 8 B  | 3.607734 | 2.953881 | 0.000000 |          |
|  |  | 9 B  | 1.687908 | 2.854922 | 3.274272 | 0.000000 |
|  |  | 10 B | 1.706371 | 1.768272 | 3.473760 | 2.919029 |
|  |  | 11 B | 1.735045 | 2.855914 | 3.474629 | 1.750455 |
|  |  | 12 B | 2.970644 | 3.708597 | 2.725676 | 1.732747 |
|  |  | 13 B | 1.679541 | 1.762753 | 2.901048 | 1.764254 |
|  |  | 14 B | 3.496866 | 3.412996 | 1.987847 | 3.242554 |
|  |  |      | 11       | 12       | 13       | 14       |
|  |  | 11 B | 0.000000 |          |          |          |
|  |  | 12 B | 1.953608 | 0.000000 |          |          |
|  |  | 13 B | 2.845209 | 2.999762 | 0.000000 |          |
|  |  | 14 B | 2.490133 | 2.167326 | 3.699595 | 0.000000 |

  

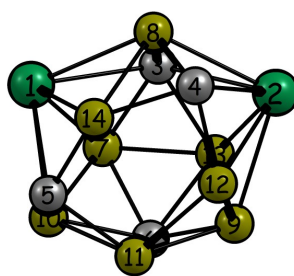

7. -3428.667672 +21.8  $C_1$

WBI: Fe1-Fe2: 0.1293

|                                                                                                                                                             |          |          |          |          |          |          |  |
|-------------------------------------------------------------------------------------------------------------------------------------------------------------|----------|----------|----------|----------|----------|----------|--|
| 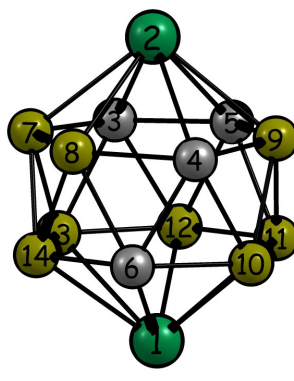 <p>8. -3428.662113 +25.3 <math>C_1</math></p> <p>WBI: Fe1-Fe2: 0.0609</p> | 1        | 2        | 3        | 4        | 5        |          |  |
|                                                                                                                                                             | 1 Fe     | 0.000000 |          |          |          |          |  |
|                                                                                                                                                             | 2 Fe     | 4.134558 | 0.000000 |          |          |          |  |
|                                                                                                                                                             | 3 C      | 3.177538 | 2.187452 | 0.000000 |          |          |  |
|                                                                                                                                                             | 4 C      | 3.222053 | 2.152908 | 3.318858 | 0.000000 |          |  |
|                                                                                                                                                             | 5 C      | 3.177538 | 2.159409 | 1.597620 | 2.870326 | 0.000000 |  |
|                                                                                                                                                             | 6 C      | 2.125685 | 3.256813 | 3.493649 | 1.668482 | 3.480292 |  |
|                                                                                                                                                             | 7 B      | 3.275069 | 2.146248 | 1.671245 | 2.912058 | 2.845919 |  |
|                                                                                                                                                             | 8 B      | 3.310105 | 2.130406 | 2.933960 | 1.653537 | 3.332095 |  |
|                                                                                                                                                             | 9 B      | 3.244959 | 2.130752 | 2.861024 | 1.654325 | 1.678615 |  |
|                                                                                                                                                             | 10 B     | 2.108054 | 3.339479 | 3.547943 | 1.730929 | 2.804524 |  |
|                                                                                                                                                             | 11 B     | 2.128808 | 3.340139 | 2.770434 | 2.816281 | 1.713382 |  |
|                                                                                                                                                             | 12 B     | 2.118885 | 3.389486 | 1.716476 | 3.620565 | 1.725111 |  |
|                                                                                                                                                             | 13 B     | 2.136518 | 3.349188 | 1.703055 | 3.595170 | 2.766768 |  |
| 14 B                                                                                                                                                        | 2.141015 | 3.300292 | 2.789570 | 2.769011 | 3.516933 |          |  |
|                                                                                                                                                             | 6        | 7        | 8        | 9        | 10       |          |  |
| 6 C                                                                                                                                                         | 0.000000 |          |          |          |          |          |  |
| 7 B                                                                                                                                                         | 2.805487 | 0.000000 |          |          |          |          |  |
| 8 B                                                                                                                                                         | 1.730386 | 1.741737 | 0.000000 |          |          |          |  |
| 9 B                                                                                                                                                         | 2.757708 | 3.340889 | 2.884508 | 0.000000 |          |          |  |
| 10 B                                                                                                                                                        | 1.662875 | 3.617476 | 2.846663 | 1.769613 | 0.000000 |          |  |
| 11 B                                                                                                                                                        | 2.919767 | 3.618155 | 3.642312 | 1.760745 | 1.719401 |          |  |
| 12 B                                                                                                                                                        | 3.390975 | 2.871784 | 3.692007 | 2.867961 | 2.976062 |          |  |
| 13 B                                                                                                                                                        | 2.930258 | 1.766296 | 2.906824 | 3.603240 | 3.416364 |          |  |
| 14 B                                                                                                                                                        | 1.655079 | 1.767822 | 1.772808 | 3.555812 | 2.914863 |          |  |
|                                                                                                                                                             | 11       | 12       | 13       | 14       |          |          |  |
| 11 B                                                                                                                                                        | 0.000000 |          |          |          |          |          |  |
| 12 B                                                                                                                                                        | 1.722114 | 0.000000 |          |          |          |          |  |
| 13 B                                                                                                                                                        | 2.971565 | 1.723024 | 0.000000 |          |          |          |  |
| 14 B                                                                                                                                                        | 3.409235 | 2.983358 | 1.737151 | 0.000000 |          |          |  |

|                                                                                                                                                             |          |          |          |          |          |          |  |
|-------------------------------------------------------------------------------------------------------------------------------------------------------------|----------|----------|----------|----------|----------|----------|--|
| 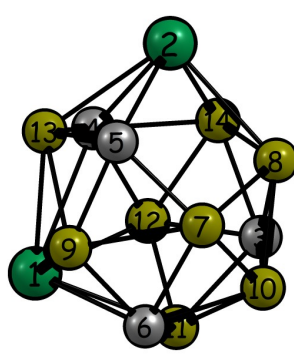 <p>9. -3428.662090 +25.3 <math>C_1</math></p> <p>WBI: Fe1-Fe2: 0.1319</p> |          | 1        | 2        | 3        | 4        | 5        |  |
|                                                                                                                                                             | 1 Fe     | 0.000000 |          |          |          |          |  |
|                                                                                                                                                             | 2 Fe     | 3.755170 | 0.000000 |          |          |          |  |
|                                                                                                                                                             | 3 C      | 3.139678 | 3.276851 | 0.000000 |          |          |  |
|                                                                                                                                                             | 4 C      | 2.165608 | 2.120081 | 2.710314 | 0.000000 |          |  |
|                                                                                                                                                             | 5 C      | 3.146002 | 2.025043 | 3.698320 | 2.804226 | 0.000000 |  |
|                                                                                                                                                             | 6 C      | 2.111341 | 3.864067 | 2.696543 | 3.281944 | 2.732384 |  |
|                                                                                                                                                             | 7 B      | 3.265006 | 2.803168 | 2.898641 | 3.346460 | 1.620360 |  |
|                                                                                                                                                             | 8 B      | 3.718567 | 2.142291 | 1.776506 | 2.852366 | 2.607034 |  |
|                                                                                                                                                             | 9 B      | 2.086659 | 3.247730 | 3.619921 | 2.947966 | 1.608752 |  |
|                                                                                                                                                             | 10 B     | 3.242104 | 3.546241 | 1.644445 | 3.459570 | 3.118435 |  |
|                                                                                                                                                             | 11 B     | 2.067493 | 4.059251 | 1.692404 | 2.932183 | 3.718365 |  |
|                                                                                                                                                             | 12 B     | 2.078012 | 3.291584 | 1.693647 | 1.656496 | 3.741572 |  |
|                                                                                                                                                             | 13 B     | 2.212633 | 2.077084 | 3.629172 | 1.649162 | 1.604528 |  |
| 14 B                                                                                                                                                        | 3.284850 | 2.004450 | 1.686984 | 1.701881 | 3.241199 |          |  |
|                                                                                                                                                             |          | 6        | 7        | 8        | 9        | 10       |  |
| 6 C                                                                                                                                                         | 0.000000 |          |          |          |          |          |  |
| 7 B                                                                                                                                                         | 1.835906 | 0.000000 |          |          |          |          |  |
| 8 B                                                                                                                                                         | 2.893050 | 1.903716 | 0.000000 |          |          |          |  |
| 9 B                                                                                                                                                         | 1.631102 | 1.839391 | 3.231773 | 0.000000 |          |          |  |
| 10 B                                                                                                                                                        | 1.712277 | 1.750126 | 1.738665 | 2.867761 | 0.000000 |          |  |
| 11 B                                                                                                                                                        | 1.640302 | 2.908831 | 2.886955 | 2.905785 | 1.791923 |          |  |
| 12 B                                                                                                                                                        | 2.903126 | 3.555417 | 2.861879 | 3.409707 | 2.835583 |          |  |
| 13 B                                                                                                                                                        | 2.983299 | 2.752237 | 3.163395 | 1.863350 | 3.641069 |          |  |
| 14 B                                                                                                                                                        | 3.513932 | 3.184918 | 1.764427 | 3.702058 | 2.817274 |          |  |
|                                                                                                                                                             |          | 11       | 12       | 13       | 14       |          |  |
| 11 B                                                                                                                                                        | 0.000000 |          |          |          |          |          |  |
| 12 B                                                                                                                                                        | 1.765935 | 0.000000 |          |          |          |          |  |
| 13 B                                                                                                                                                        | 3.474927 | 2.947758 | 0.000000 |          |          |          |  |
| 14 B                                                                                                                                                        | 2.880145 | 1.782243 | 2.875763 | 0.000000 |          |          |  |

|  |      |          |          |          |          |          |
|--|------|----------|----------|----------|----------|----------|
|  |      | 1        | 2        | 3        | 4        | 5        |
|  | 1 Fe | 0.000000 |          |          |          |          |
|  | 2 Fe | 3.735243 | 0.000000 |          |          |          |
|  | 3 C  | 3.243110 | 2.114404 | 0.000000 |          |          |
|  | 4 C  | 2.002491 | 3.247979 | 3.735969 | 0.000000 |          |
|  | 5 C  | 2.076422 | 3.795137 | 3.580768 | 1.454123 | 0.000000 |
|  | 6 C  | 3.915347 | 2.090405 | 2.845964 | 2.807825 | 2.824080 |
|  | 7 B  | 2.105629 | 3.315284 | 1.687505 | 3.364425 | 2.921824 |
|  | 8 B  | 2.115682 | 2.159656 | 2.978929 | 1.617110 | 2.684997 |
|  | 9 B  | 3.319646 | 2.084572 | 3.374509 | 1.778120 | 2.567586 |
|  | 10 B | 3.992617 | 2.098688 | 1.697195 | 3.673870 | 3.376282 |
|  | 11 B | 3.298790 | 3.283492 | 1.693985 | 3.722394 | 2.922627 |
|  | 12 B | 2.122126 | 3.886680 | 2.774199 | 2.728126 | 1.610170 |
|  | 13 B | 3.311706 | 3.198868 | 2.777852 | 2.744977 | 1.886385 |
|  | 14 B | 2.178752 | 2.101072 | 1.675166 | 2.916766 | 3.276471 |
|  |      | 6        | 7        | 8        | 9        | 10       |
|  | 6 C  | 0.000000 |          |          |          |          |
|  | 7 B  | 3.648982 | 0.000000 |          |          |          |
|  | 8 B  | 2.868379 | 3.010006 | 0.000000 |          |          |
|  | 9 B  | 1.537490 | 3.836709 | 1.798768 | 0.000000 |          |
|  | 10 B | 1.587313 | 2.874273 | 3.371599 | 2.796376 | 0.000000 |
|  | 11 B | 2.826586 | 1.742288 | 3.699191 | 3.683213 | 1.756986 |
|  | 12 B | 3.231594 | 1.756310 | 3.266717 | 3.495819 | 2.967038 |
|  | 13 B | 1.709956 | 2.876151 | 3.309635 | 2.576223 | 1.863875 |
|  | 14 B | 3.293570 | 1.766939 | 1.760430 | 3.003547 | 2.898308 |
|  |      | 11       | 12       | 13       | 14       |          |
|  | 11 B | 0.000000 |          |          |          |          |
|  | 12 B | 1.735222 | 0.000000 |          |          |          |
|  | 13 B | 1.800238 | 1.840586 | 0.000000 |          |          |
|  | 14 B | 2.835604 | 2.930690 | 3.375735 | 0.000000 |          |

  

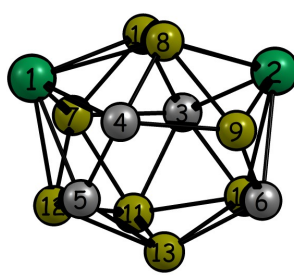

10. -3428.658849 +27.4  $C_1$

WBI: Fe1-Fe2: 0.1429

|                                                                                                                                                              |          |          |          |          |          |          |
|--------------------------------------------------------------------------------------------------------------------------------------------------------------|----------|----------|----------|----------|----------|----------|
| 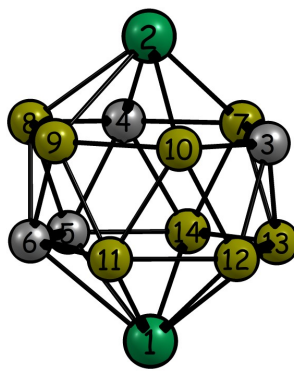 <p>11. -3428.657110 +28.4 <math>C_1</math></p> <p>WBI: Fe1-Fe2: 0.0624</p> | 1        | 2        | 3        | 4        | 5        |          |
|                                                                                                                                                              | 1 Fe     | 0.000000 |          |          |          |          |
|                                                                                                                                                              | 2 Fe     | 4.125735 | 0.000000 |          |          |          |
|                                                                                                                                                              | 3 C      | 3.210065 | 2.177171 | 0.000000 |          |          |
|                                                                                                                                                              | 4 C      | 3.224298 | 2.101906 | 2.863991 | 0.000000 |          |
|                                                                                                                                                              | 5 C      | 2.088747 | 3.227274 | 3.483879 | 1.693925 | 0.000000 |
|                                                                                                                                                              | 6 C      | 2.155572 | 3.177662 | 3.469974 | 2.674868 | 1.583762 |
|                                                                                                                                                              | 7 B      | 3.263722 | 2.121404 | 1.663404 | 1.663227 | 2.777746 |
|                                                                                                                                                              | 8 B      | 3.360874 | 2.079686 | 3.366857 | 1.645288 | 1.776378 |
|                                                                                                                                                              | 9 B      | 3.333582 | 2.135248 | 2.932430 | 2.894106 | 2.792858 |
|                                                                                                                                                              | 10 B     | 3.300393 | 2.165658 | 1.663774 | 3.344338 | 3.547306 |
|                                                                                                                                                              | 11 B     | 2.158029 | 3.286319 | 2.784521 | 3.531144 | 2.852234 |
|                                                                                                                                                              | 12 B     | 2.155548 | 3.340490 | 1.708178 | 3.583415 | 3.350400 |
|                                                                                                                                                              | 13 B     | 2.163243 | 3.327245 | 1.697078 | 2.820031 | 2.923520 |
|                                                                                                                                                              | 14 B     | 2.111546 | 3.301950 | 2.793928 | 1.730369 | 1.667541 |
|                                                                                                                                                              | 6        | 7        | 8        | 9        | 10       |          |
| 6 C                                                                                                                                                          | 0.000000 |          |          |          |          |          |
| 7 B                                                                                                                                                          | 3.484434 | 0.000000 |          |          |          |          |
| 8 B                                                                                                                                                          | 1.731110 | 2.906131 | 0.000000 |          |          |          |
| 9 B                                                                                                                                                          | 1.709001 | 3.380536 | 1.719413 | 0.000000 |          |          |
| 10 B                                                                                                                                                         | 2.795863 | 2.905611 | 2.976144 | 1.743103 | 0.000000 |          |
| 11 B                                                                                                                                                         | 1.679527 | 3.579550 | 2.876850 | 1.765157 | 1.764058 |          |
| 12 B                                                                                                                                                         | 2.933312 | 2.844923 | 3.690861 | 2.903915 | 1.763639 |          |
| 13 B                                                                                                                                                         | 3.376796 | 1.754435 | 3.682412 | 3.682613 | 2.855713 |          |
| 14 B                                                                                                                                                         | 2.861140 | 1.767517 | 2.870301 | 3.638674 | 3.619277 |          |
|                                                                                                                                                              | 11       | 12       | 13       | 14       |          |          |
| 11 B                                                                                                                                                         | 0.000000 |          |          |          |          |          |
| 12 B                                                                                                                                                         | 1.731929 | 0.000000 |          |          |          |          |
| 13 B                                                                                                                                                         | 2.985042 | 1.731596 | 0.000000 |          |          |          |
| 14 B                                                                                                                                                         | 3.386514 | 2.965701 | 1.726373 | 0.000000 |          |          |



|                                                                                                                                                              |          |          |          |          |          |          |
|--------------------------------------------------------------------------------------------------------------------------------------------------------------|----------|----------|----------|----------|----------|----------|
| 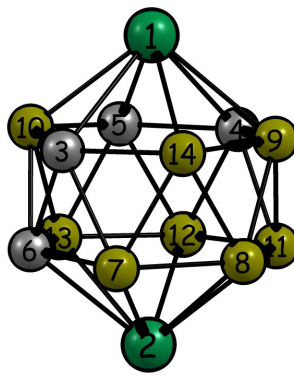 <p>12. -3428.656896 +28.6 <math>C_1</math></p> <p>WBI: Fe1-Fe2: 0.0614</p> | 1        | 2        | 3        | 4        | 5        |          |
|                                                                                                                                                              | 1 Fe     | 0.000000 |          |          |          |          |
|                                                                                                                                                              | 2 Fe     | 4.131422 | 0.000000 |          |          |          |
|                                                                                                                                                              | 3 C      | 2.152864 | 3.217989 | 0.000000 |          |          |
|                                                                                                                                                              | 4 C      | 2.185570 | 3.179431 | 3.319264 | 0.000000 |          |
|                                                                                                                                                              | 5 C      | 2.159275 | 3.163714 | 2.856316 | 1.610738 | 0.000000 |
|                                                                                                                                                              | 6 C      | 3.253353 | 2.101885 | 1.670243 | 3.472310 | 2.711107 |
|                                                                                                                                                              | 7 B      | 3.344473 | 2.121500 | 1.734359 | 3.571034 | 3.540905 |
|                                                                                                                                                              | 8 B      | 3.319439 | 2.174760 | 2.811083 | 2.795654 | 3.538868 |
|                                                                                                                                                              | 9 B      | 2.145614 | 3.288472 | 2.923522 | 1.666521 | 2.851592 |
|                                                                                                                                                              | 10 B     | 2.094308 | 3.271682 | 1.649852 | 2.853840 | 1.657904 |
|                                                                                                                                                              | 11 B     | 3.351449 | 2.151184 | 3.603018 | 1.705499 | 2.777048 |
|                                                                                                                                                              | 12 B     | 3.378056 | 2.116241 | 3.610734 | 1.710435 | 1.718224 |
|                                                                                                                                                              | 13 B     | 3.324634 | 2.085848 | 2.779002 | 2.767504 | 1.709240 |
| 14 B                                                                                                                                                         | 2.162916 | 3.280087 | 1.656188 | 2.941762 | 3.334857 |          |
|                                                                                                                                                              | 6        | 7        | 8        | 9        | 10       |          |
| 6 C                                                                                                                                                          | 0.000000 |          |          |          |          |          |
| 7 B                                                                                                                                                          | 1.667139 | 0.000000 |          |          |          |          |
| 8 B                                                                                                                                                          | 2.924056 | 1.733143 | 0.000000 |          |          |          |
| 9 B                                                                                                                                                          | 3.557613 | 2.894330 | 1.771977 | 0.000000 |          |          |
| 10 B                                                                                                                                                         | 1.734058 | 2.840781 | 3.605370 | 3.337059 | 0.000000 |          |
| 11 B                                                                                                                                                         | 3.375480 | 2.985921 | 1.731602 | 1.767787 | 3.621796 |          |
| 12 B                                                                                                                                                         | 2.919714 | 3.433809 | 2.993815 | 2.866246 | 2.877444 |          |
| 13 B                                                                                                                                                         | 1.640221 | 2.911360 | 3.406733 | 3.600187 | 1.785475 |          |
| 14 B                                                                                                                                                         | 2.768858 | 1.767322 | 1.760685 | 1.760000 | 2.882623 |          |
|                                                                                                                                                              | 11       | 12       | 13       | 14       |          |          |
| 11 B                                                                                                                                                         | 0.000000 |          |          |          |          |          |
| 12 B                                                                                                                                                         | 1.727447 | 0.000000 |          |          |          |          |
| 13 B                                                                                                                                                         | 2.961678 | 1.722393 | 0.000000 |          |          |          |
| 14 B                                                                                                                                                         | 2.894912 | 3.673417 | 3.594000 | 0.000000 |          |          |

|                                                                                                                                                              |          |          |          |          |          |          |  |  |
|--------------------------------------------------------------------------------------------------------------------------------------------------------------|----------|----------|----------|----------|----------|----------|--|--|
| 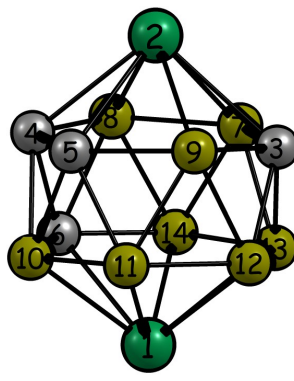 <p>13. -3428.655765 +29.3 <math>C_1</math></p> <p>WBI: Fe1-Fe2: 0.0618</p> |          | 1        | 2        | 3        | 4        | 5        |  |  |
|                                                                                                                                                              | 1 Fe     | 0.000000 |          |          |          |          |  |  |
|                                                                                                                                                              | 2 Fe     | 4.134947 | 0.000000 |          |          |          |  |  |
|                                                                                                                                                              | 3 C      | 3.199579 | 2.194465 | 0.000000 |          |          |  |  |
|                                                                                                                                                              | 4 C      | 3.208908 | 2.132190 | 3.312244 | 0.000000 |          |  |  |
|                                                                                                                                                              | 5 C      | 3.161855 | 2.149505 | 2.871926 | 1.585852 | 0.000000 |  |  |
|                                                                                                                                                              | 6 C      | 2.103907 | 3.255527 | 3.495589 | 1.680862 | 2.675289 |  |  |
|                                                                                                                                                              | 7 B      | 3.280671 | 2.171675 | 1.664128 | 2.920534 | 3.328901 |  |  |
|                                                                                                                                                              | 8 B      | 3.302066 | 2.121178 | 2.921061 | 1.655380 | 2.833429 |  |  |
|                                                                                                                                                              | 9 B      | 3.257972 | 2.129133 | 1.661606 | 2.853037 | 1.681613 |  |  |
|                                                                                                                                                              | 10 B     | 2.061661 | 3.380251 | 3.587039 | 1.768519 | 1.734981 |  |  |
|                                                                                                                                                              | 11 B     | 2.132043 | 3.338458 | 2.799291 | 2.797324 | 1.710255 |  |  |
|                                                                                                                                                              | 12 B     | 2.158751 | 3.351723 | 1.698510 | 3.583926 | 2.806379 |  |  |
|                                                                                                                                                              | 13 B     | 2.153125 | 3.358407 | 1.704208 | 3.592243 | 3.561953 |  |  |
| 14 B                                                                                                                                                         | 2.142542 | 3.306254 | 2.784515 | 2.779557 | 3.495592 |          |  |  |
|                                                                                                                                                              |          | 6        | 7        | 8        | 9        | 10       |  |  |
| 6 C                                                                                                                                                          | 0.000000 |          |          |          |          |          |  |  |
| 7 B                                                                                                                                                          | 2.809739 | 0.000000 |          |          |          |          |  |  |
| 8 B                                                                                                                                                          | 1.736120 | 1.744074 | 0.000000 |          |          |          |  |  |
| 9 B                                                                                                                                                          | 3.518364 | 2.895083 | 3.342616 | 0.000000 |          |          |  |  |
| 10 B                                                                                                                                                         | 1.651045 | 3.646694 | 2.865910 | 2.872361 | 0.000000 |          |  |  |
| 11 B                                                                                                                                                         | 2.911161 | 3.632590 | 3.635041 | 1.766648 | 1.723234 |          |  |  |
| 12 B                                                                                                                                                         | 3.381484 | 2.854310 | 3.664401 | 1.763792 | 2.976155 |          |  |  |
| 13 B                                                                                                                                                         | 2.927817 | 1.760750 | 2.903805 | 2.845291 | 3.420076 |          |  |  |
| 14 B                                                                                                                                                         | 1.661329 | 1.760080 | 1.778692 | 3.576978 | 2.916109 |          |  |  |
|                                                                                                                                                              |          | 11       | 12       | 13       | 14       |          |  |  |
| 11 B                                                                                                                                                         | 0.000000 |          |          |          |          |          |  |  |
| 12 B                                                                                                                                                         | 1.724001 | 0.000000 |          |          |          |          |  |  |
| 13 B                                                                                                                                                         | 2.984153 | 1.732761 | 0.000000 |          |          |          |  |  |
| 14 B                                                                                                                                                         | 3.415588 | 2.983884 | 1.732344 | 0.000000 |          |          |  |  |

|                                                                                                                                                                     |          |          |          |          |          |          |
|---------------------------------------------------------------------------------------------------------------------------------------------------------------------|----------|----------|----------|----------|----------|----------|
| 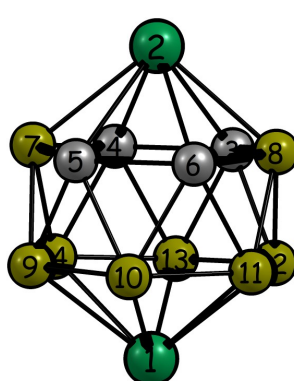 <p>14. -3428.655470 +29.5<br/><math>C_{2v}</math></p> <p>WBI: Fe1-Fe2: 0.0589</p> | 1        | 2        | 3        | 4        | 5        |          |
|                                                                                                                                                                     | 1 Fe     | 0.000000 |          |          |          |          |
|                                                                                                                                                                     | 2 Fe     | 4.159858 | 0.000000 |          |          |          |
|                                                                                                                                                                     | 3 C      | 3.167368 | 2.187448 | 0.000000 |          |          |
|                                                                                                                                                                     | 4 C      | 3.169756 | 2.196191 | 1.596520 | 0.000000 |          |
|                                                                                                                                                                     | 5 C      | 3.171855 | 2.197407 | 3.288653 | 2.878221 | 0.000000 |
|                                                                                                                                                                     | 6 C      | 3.167726 | 2.187480 | 2.872452 | 3.286430 | 1.591198 |
|                                                                                                                                                                     | 7 B      | 3.246133 | 2.141017 | 2.835211 | 1.673522 | 1.668784 |
|                                                                                                                                                                     | 8 B      | 3.243484 | 2.127296 | 1.671910 | 2.837393 | 2.833305 |
|                                                                                                                                                                     | 9 B      | 2.130103 | 3.380151 | 3.550618 | 2.803448 | 1.714697 |
|                                                                                                                                                                     | 10 B     | 2.109806 | 3.419268 | 3.591798 | 3.591825 | 1.721049 |
|                                                                                                                                                                     | 11 B     | 2.127589 | 3.370655 | 2.805086 | 3.553681 | 2.768969 |
|                                                                                                                                                                     | 12 B     | 2.128364 | 3.367300 | 1.707446 | 2.770211 | 3.551561 |
|                                                                                                                                                                     | 13 B     | 2.108017 | 3.412751 | 1.719535 | 1.718474 | 3.589417 |
| 14 B                                                                                                                                                                | 2.130489 | 3.375592 | 2.769701 | 1.708934 | 2.803065 |          |
|                                                                                                                                                                     | 6        | 7        | 8        | 9        | 10       |          |
| 6 C                                                                                                                                                                 | 0.000000 |          |          |          |          |          |
| 7 B                                                                                                                                                                 | 2.828065 | 0.000000 |          |          |          |          |
| 8 B                                                                                                                                                                 | 1.668072 | 3.286295 | 0.000000 |          |          |          |
| 9 B                                                                                                                                                                 | 2.769917 | 1.769948 | 3.595799 | 0.000000 |          |          |
| 10 B                                                                                                                                                                | 1.724042 | 2.859634 | 2.865398 | 1.722919 | 0.000000 |          |
| 11 B                                                                                                                                                                | 1.709829 | 3.593355 | 1.771586 | 2.977636 | 1.725449 |          |
| 12 B                                                                                                                                                                | 2.802058 | 3.594688 | 1.770191 | 3.437518 | 2.986484 |          |
| 13 B                                                                                                                                                                | 3.585843 | 2.862114 | 2.863125 | 2.979701 | 3.451786 |          |
| 14 B                                                                                                                                                                | 3.545829 | 1.770397 | 3.594519 | 1.712149 | 2.979882 |          |
|                                                                                                                                                                     | 11       | 12       | 13       | 14       |          |          |
| 11 B                                                                                                                                                                | 0.000000 |          |          |          |          |          |
| 12 B                                                                                                                                                                | 1.719988 | 0.000000 |          |          |          |          |
| 13 B                                                                                                                                                                | 2.984200 | 1.724326 | 0.000000 |          |          |          |
| 14 B                                                                                                                                                                | 3.436451 | 2.978198 | 1.723347 | 0.000000 |          |          |

|                                                                                                                                                              |          |          |          |          |          |          |  |
|--------------------------------------------------------------------------------------------------------------------------------------------------------------|----------|----------|----------|----------|----------|----------|--|
| 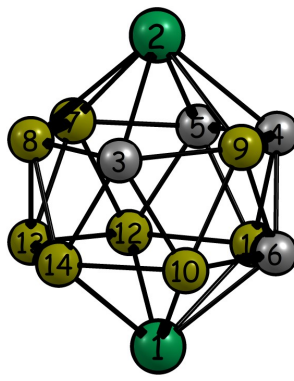 <p>15. -3428.650568 +32.5 <math>C_1</math></p> <p>WBI: Fe1-Fe2: 0.0617</p> |          | 1        | 2        | 3        | 4        | 5        |  |
|                                                                                                                                                              | 1 Fe     | 0.000000 |          |          |          |          |  |
|                                                                                                                                                              | 2 Fe     | 4.140818 | 0.000000 |          |          |          |  |
|                                                                                                                                                              | 3 C      | 3.184485 | 2.192803 | 0.000000 |          |          |  |
|                                                                                                                                                              | 4 C      | 3.208669 | 2.115008 | 2.850014 | 0.000000 |          |  |
|                                                                                                                                                              | 5 C      | 3.162444 | 2.195446 | 3.318168 | 1.580916 | 0.000000 |  |
|                                                                                                                                                              | 6 C      | 2.085149 | 3.264963 | 2.712426 | 1.701485 | 2.679855 |  |
|                                                                                                                                                              | 7 B      | 3.287956 | 2.151032 | 2.936343 | 2.832139 | 1.675808 |  |
|                                                                                                                                                              | 8 B      | 3.295242 | 2.158740 | 1.674206 | 3.320499 | 2.942950 |  |
|                                                                                                                                                              | 9 B      | 3.269934 | 2.102045 | 1.646593 | 1.656079 | 2.840637 |  |
|                                                                                                                                                              | 10 B     | 2.099991 | 3.338239 | 1.693635 | 2.793925 | 3.518147 |  |
|                                                                                                                                                              | 11 B     | 2.061285 | 3.400183 | 3.573981 | 1.785723 | 1.726121 |  |
|                                                                                                                                                              | 12 B     | 2.139605 | 3.355138 | 3.583019 | 2.792000 | 1.702298 |  |
|                                                                                                                                                              | 13 B     | 2.189762 | 3.325074 | 2.797101 | 3.556590 | 2.799981 |  |
|                                                                                                                                                              | 14 B     | 2.162171 | 3.352506 | 1.701386 | 3.582379 | 3.579244 |  |
|                                                                                                                                                              |          | 6        | 7        | 8        | 9        | 10       |  |
| 6 C                                                                                                                                                          | 0.000000 |          |          |          |          |          |  |
| 7 B                                                                                                                                                          | 3.534185 | 0.000000 |          |          |          |          |  |
| 8 B                                                                                                                                                          | 3.547613 | 1.758786 | 0.000000 |          |          |          |  |
| 9 B                                                                                                                                                          | 1.740685 | 3.336974 | 2.884534 | 0.000000 |          |          |  |
| 10 B                                                                                                                                                         | 1.649287 | 3.626467 | 2.847570 | 1.786821 | 0.000000 |          |  |
| 11 B                                                                                                                                                         | 1.652065 | 2.875036 | 3.667912 | 2.865004 | 2.909213 |          |  |
| 12 B                                                                                                                                                         | 2.906418 | 1.765231 | 2.893899 | 3.612673 | 3.408403 |          |  |
| 13 B                                                                                                                                                         | 3.375111 | 1.769834 | 1.763611 | 3.608703 | 2.975940 |          |  |
| 14 B                                                                                                                                                         | 2.926112 | 2.891964 | 1.759914 | 2.861308 | 1.734639 |          |  |
|                                                                                                                                                              |          | 11       | 12       | 13       | 14       |          |  |
| 11 B                                                                                                                                                         | 0.000000 |          |          |          |          |          |  |
| 12 B                                                                                                                                                         | 1.723147 | 0.000000 |          |          |          |          |  |
| 13 B                                                                                                                                                         | 2.984599 | 1.734186 | 0.000000 |          |          |          |  |
| 14 B                                                                                                                                                         | 3.430283 | 2.992093 | 1.730253 | 0.000000 |          |          |  |

|                                                                                                                                                              |          |          |          |          |          |          |  |
|--------------------------------------------------------------------------------------------------------------------------------------------------------------|----------|----------|----------|----------|----------|----------|--|
| 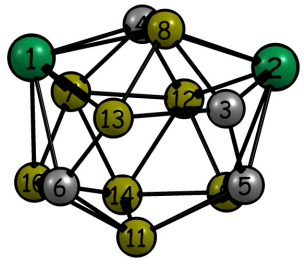 <p>16. -3428.650497 +32.6 <math>C_1</math></p> <p>WBI: Fe1-Fe2: 0.1610</p> |          | 1        | 2        | 3        | 4        | 5        |  |
|                                                                                                                                                              | 1 Fe     | 0.000000 |          |          |          |          |  |
|                                                                                                                                                              | 2 Fe     | 3.805225 | 0.000000 |          |          |          |  |
|                                                                                                                                                              | 3 C      | 3.231457 | 2.001418 | 0.000000 |          |          |  |
|                                                                                                                                                              | 4 C      | 2.129264 | 2.185578 | 2.842462 | 0.000000 |          |  |
|                                                                                                                                                              | 5 C      | 3.802511 | 2.072463 | 1.450341 | 3.218530 | 0.000000 |  |
|                                                                                                                                                              | 6 C      | 2.089195 | 3.977163 | 2.824805 | 3.279948 | 2.848380 |  |
|                                                                                                                                                              | 7 B      | 2.087145 | 3.371801 | 3.783325 | 1.676685 | 3.691672 |  |
|                                                                                                                                                              | 8 B      | 2.132949 | 2.134905 | 1.629477 | 1.658051 | 2.682095 |  |
|                                                                                                                                                              | 9 B      | 3.876747 | 2.147101 | 2.710472 | 2.873543 | 1.606587 |  |
|                                                                                                                                                              | 10 B     | 2.126058 | 4.088896 | 3.700111 | 2.928090 | 3.421394 |  |
|                                                                                                                                                              | 11 B     | 3.195730 | 3.363665 | 2.774026 | 3.334802 | 1.934566 |  |
|                                                                                                                                                              | 12 B     | 3.296821 | 2.107319 | 3.310694 | 1.679096 | 2.915015 |  |
|                                                                                                                                                              | 13 B     | 2.067841 | 3.339446 | 1.761606 | 2.955481 | 2.545091 |  |
| 14 B                                                                                                                                                         | 3.260198 | 3.329342 | 3.709249 | 2.768752 | 2.950228 |          |  |
|                                                                                                                                                              |          | 6        | 7        | 8        | 9        | 10       |  |
| 6 C                                                                                                                                                          | 0.000000 |          |          |          |          |          |  |
| 7 B                                                                                                                                                          | 2.895160 | 0.000000 |          |          |          |          |  |
| 8 B                                                                                                                                                          | 2.882764 | 2.930203 | 0.000000 |          |          |          |  |
| 9 B                                                                                                                                                          | 3.211493 | 2.885808 | 3.222061 | 0.000000 |          |          |  |
| 10 B                                                                                                                                                         | 1.585787 | 1.777575 | 3.373357 | 2.975951 | 0.000000 |          |  |
| 11 B                                                                                                                                                         | 1.708862 | 2.869103 | 3.307120 | 1.821857 | 1.855135 |          |  |
| 12 B                                                                                                                                                         | 3.644759 | 1.766936 | 2.893395 | 1.781293 | 2.918162 |          |  |
| 13 B                                                                                                                                                         | 1.539631 | 3.384870 | 1.821080 | 3.444095 | 2.798430 |          |  |
| 14 B                                                                                                                                                         | 2.821172 | 1.766976 | 3.624784 | 1.740301 | 1.762145 |          |  |
|                                                                                                                                                              |          | 11       | 12       | 13       | 14       |          |  |
| 11 B                                                                                                                                                         | 0.000000 |          |          |          |          |          |  |
| 12 B                                                                                                                                                         | 2.883895 | 0.000000 |          |          |          |          |  |
| 13 B                                                                                                                                                         | 2.564681 | 3.776837 | 0.000000 |          |          |          |  |
| 14 B                                                                                                                                                         | 1.801974 | 1.752321 | 3.643793 | 0.000000 |          |          |  |

|  |      |          |          |          |          |          |
|--|------|----------|----------|----------|----------|----------|
|  | 1    | 2        | 3        | 4        | 5        |          |
|  | 1 Fe | 0.000000 |          |          |          |          |
|  | 2 Fe | 3.734643 | 0.000000 |          |          |          |
|  | 3 C  | 3.189993 | 1.972875 | 0.000000 |          |          |
|  | 4 C  | 2.210452 | 2.039848 | 1.554066 | 0.000000 |          |
|  | 5 C  | 3.147906 | 3.518691 | 3.000990 | 3.477042 | 0.000000 |
|  | 6 C  | 2.109495 | 3.203865 | 3.649546 | 2.937164 | 2.648971 |
|  | 7 B  | 3.703143 | 2.146939 | 2.480305 | 3.071822 | 1.739580 |
|  | 8 B  | 2.084746 | 4.038503 | 3.708567 | 3.435478 | 1.722691 |
|  | 9 B  | 3.319455 | 2.026768 | 3.211309 | 2.920569 | 2.775567 |
|  | 10 B | 2.099526 | 3.235613 | 1.658135 | 1.743374 | 2.817089 |
|  | 11 B | 3.279048 | 3.341837 | 3.717775 | 3.709908 | 1.644623 |
|  | 12 B | 2.148270 | 2.090638 | 2.787111 | 1.666417 | 3.405405 |
|  | 13 B | 3.207668 | 2.948490 | 1.627485 | 2.667691 | 1.693147 |
|  | 14 B | 2.143385 | 3.983040 | 2.820873 | 2.980172 | 1.717776 |
|  |      | 6        | 7        | 8        | 9        | 10       |
|  | 6 C  | 0.000000 |          |          |          |          |
|  | 7 B  | 2.731717 | 0.000000 |          |          |          |
|  | 8 B  | 1.670593 | 2.864914 | 0.000000 |          |          |
|  | 9 B  | 1.709277 | 1.755930 | 2.849473 | 0.000000 |          |
|  | 10 B | 3.380293 | 3.221300 | 2.963526 | 3.744204 | 0.000000 |
|  | 11 B | 1.693369 | 1.786932 | 1.750087 | 1.717843 | 3.752600 |
|  | 12 B | 1.697829 | 2.865118 | 2.933332 | 1.795089 | 2.923663 |
|  | 13 B | 3.462195 | 1.998613 | 2.865658 | 3.285739 | 1.778115 |
|  | 14 B | 2.922908 | 2.996701 | 1.726046 | 3.648659 | 1.703178 |
|  |      | 11       | 12       | 13       | 14       |          |
|  | 11 B | 0.000000 |          |          |          |          |
|  | 12 B | 2.870899 | 0.000000 |          |          |          |
|  | 13 B | 2.981858 | 3.392742 | 0.000000 |          |          |
|  | 14 B | 2.883751 | 3.380802 | 1.793653 | 0.000000 |          |

  

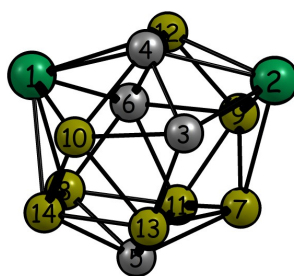

17. -3428.639650 +39.4  $C_1$

WBI: Fe1-Fe2: 0.1339

Table S7: HOMO-LUMO gaps for the lowest-lying structures.

| Structure  | HOMO (a.u.) | LUMO (a.u.) | H/L gap (a.u.) | H/L gap (eV) |
|------------|-------------|-------------|----------------|--------------|
| Fe2C4B4-01 | -0.263835   | -0.206059   | 0.057776       | 1.57         |
| Fe2C4B4-02 | -0.261537   | -0.207501   | 0.054036       | 1.47         |
| Fe2C4B4-03 | -0.264667   | -0.210749   | 0.053918       | 1.47         |
| Fe2C4B4-04 | -0.267136   | -0.211788   | 0.055348       | 1.51         |
| Fe2C4B4-05 | -0.272040   | -0.202690   | 0.069350       | 1.89         |
| Fe2C4B4-06 | -0.267135   | -0.211102   | 0.056033       | 1.52         |
| Fe2C4B4-07 | -0.269214   | -0.222224   | 0.046990       | 1.28         |
| Fe2C4B4-08 | -0.256778   | -0.204831   | 0.051947       | 1.41         |
| Fe2C4B5-01 | -0.259899   | -0.205242   | 0.054657       | 1.49         |
| Fe2C4B5-02 | -0.262271   | -0.199295   | 0.062976       | 1.71         |
| Fe2C4B5-03 | -0.269778   | -0.199418   | 0.070360       | 1.91         |
| Fe2C4B5-04 | -0.259211   | -0.199221   | 0.059990       | 1.63         |
| Fe2C4B5-05 | -0.258037   | -0.207173   | 0.050864       | 1.38         |
| Fe2C4B5-06 | -0.259699   | -0.193292   | 0.066407       | 1.81         |
| Fe2C4B5-07 | -0.264154   | -0.197885   | 0.066269       | 1.80         |
| Fe2C4B5-08 | -0.259427   | -0.213564   | 0.045863       | 1.25         |
| Fe2C4B5-09 | -0.264619   | -0.217738   | 0.046881       | 1.28         |
| Fe2C4B5-10 | -0.259799   | -0.204424   | 0.055375       | 1.51         |
| Fe2C4B5-11 | -0.256306   | -0.202692   | 0.053614       | 1.46         |
| Fe2C4B5-12 | -0.258494   | -0.192725   | 0.065769       | 1.79         |
| Fe2C4B5-13 | -0.261786   | -0.197580   | 0.064206       | 1.75         |
| Fe2C4B5-14 | -0.252378   | -0.191733   | 0.060645       | 1.65         |
| Fe2C4B5-15 | -0.259244   | -0.207357   | 0.051887       | 1.41         |
| Fe2C4B5-16 | -0.266499   | -0.195912   | 0.070587       | 1.92         |
| Fe2C4B5-17 | -0.272839   | -0.220802   | 0.052037       | 1.42         |
| Fe2C4B5-18 | -0.266891   | -0.203756   | 0.063135       | 1.72         |
| Fe2C4B5-19 | -0.269285   | -0.193383   | 0.075902       | 2.07         |
| Fe2C4B5-20 | -0.258962   | -0.202984   | 0.055978       | 1.52         |
| Fe2C4B5-21 | -0.252424   | -0.192458   | 0.059966       | 1.63         |
| Fe2C4B5-22 | -0.254890   | -0.193107   | 0.061783       | 1.68         |
| Fe2C4B5-23 | -0.268074   | -0.201674   | 0.066400       | 1.81         |
| Fe2C4B5-24 | -0.257163   | -0.192262   | 0.064901       | 1.77         |
| Fe2C4B5-25 | -0.267963   | -0.196405   | 0.071558       | 1.95         |
| Fe2C4B5-26 | -0.265654   | -0.204840   | 0.060814       | 1.65         |
| Fe2C4B6-01 | -0.269819   | -0.200664   | 0.069155       | 1.88         |
| Fe2C4B6-02 | -0.278494   | -0.201680   | 0.076814       | 2.09         |
| Fe2C4B6-03 | -0.272408   | -0.193948   | 0.078460       | 2.14         |
| Fe2C4B6-04 | -0.276799   | -0.190407   | 0.086392       | 2.35         |
| Fe2C4B6-05 | -0.258515   | -0.211720   | 0.046795       | 1.27         |
| Fe2C4B6-06 | -0.254298   | -0.197055   | 0.057243       | 1.56         |
| Fe2C4B6-07 | -0.272004   | -0.197499   | 0.074505       | 2.03         |
| Fe2C4B6-08 | -0.276683   | -0.194326   | 0.082357       | 2.24         |
| Fe2C4B6-09 | -0.275190   | -0.207025   | 0.068165       | 1.85         |
| Fe2C4B6-10 | -0.273132   | -0.191056   | 0.082076       | 2.23         |

|            |           |           |          |      |
|------------|-----------|-----------|----------|------|
| Fe2C4B6-11 | -0.258611 | -0.200626 | 0.057985 | 1.58 |
| Fe2C4B6-12 | -0.264489 | -0.229160 | 0.035329 | 0.96 |
| Fe2C4B6-13 | -0.277497 | -0.188190 | 0.089307 | 2.43 |
| Fe2C4B6-14 | -0.274098 | -0.192053 | 0.082045 | 2.23 |
| Fe2C4B6-15 | -0.269205 | -0.222440 | 0.046765 | 1.27 |
| Fe2C4B7-01 | -0.259960 | -0.189967 | 0.069993 | 1.90 |
| Fe2C4B7-02 | -0.259597 | -0.192168 | 0.067429 | 1.83 |
| Fe2C4B7-03 | -0.258403 | -0.192725 | 0.065678 | 1.79 |
| Fe2C4B7-04 | -0.260434 | -0.193168 | 0.067266 | 1.83 |
| Fe2C4B7-05 | -0.258138 | -0.195083 | 0.063055 | 1.72 |
| Fe2C4B7-06 | -0.259292 | -0.188177 | 0.071115 | 1.94 |
| Fe2C4B7-07 | -0.258660 | -0.192533 | 0.066127 | 1.80 |
| Fe2C4B7-08 | -0.260121 | -0.193788 | 0.066333 | 1.81 |
| Fe2C4B7-09 | -0.259128 | -0.190073 | 0.069055 | 1.88 |
| Fe2C4B7-10 | -0.259762 | -0.190669 | 0.069093 | 1.88 |
| Fe2C4B7-11 | -0.259065 | -0.190037 | 0.069028 | 1.88 |
| Fe2C4B7-12 | -0.259794 | -0.191547 | 0.068247 | 1.86 |
| Fe2C4B7-13 | -0.260003 | -0.193453 | 0.066550 | 1.81 |
| Fe2C4B7-14 | -0.258517 | -0.188860 | 0.069657 | 1.90 |
| Fe2C4B7-15 | -0.276565 | -0.213734 | 0.062831 | 1.71 |
| Fe2C4B7-16 | -0.258725 | -0.189937 | 0.068788 | 1.87 |
| Fe2C4B7-17 | -0.259901 | -0.191477 | 0.068424 | 1.86 |
| Fe2C4B7-18 | -0.259123 | -0.190495 | 0.068628 | 1.87 |
| Fe2C4B7-19 | -0.259960 | -0.191367 | 0.068593 | 1.87 |
| Fe2C4B7-20 | -0.259626 | -0.193001 | 0.066625 | 1.81 |
| Fe2C4B8-01 | -0.273876 | -0.188939 | 0.084937 | 2.31 |
| Fe2C4B8-02 | -0.270631 | -0.188856 | 0.081775 | 2.23 |
| Fe2C4B8-03 | -0.269991 | -0.189320 | 0.080671 | 2.20 |
| Fe2C4B8-04 | -0.272693 | -0.189262 | 0.083431 | 2.27 |
| Fe2C4B8-05 | -0.273567 | -0.189097 | 0.084470 | 2.30 |
| Fe2C4B8-06 | -0.275969 | -0.195107 | 0.080862 | 2.20 |
| Fe2C4B8-07 | -0.271432 | -0.189601 | 0.081831 | 2.23 |
| Fe2C4B8-08 | -0.272099 | -0.189144 | 0.082955 | 2.26 |
| Fe2C4B8-09 | -0.273367 | -0.188348 | 0.085019 | 2.31 |
| Fe2C4B8-10 | -0.271343 | -0.188851 | 0.082492 | 2.24 |
| Fe2C4B8-11 | -0.276590 | -0.215104 | 0.061486 | 1.67 |
| Fe2C4B8-12 | -0.270207 | -0.189123 | 0.081084 | 2.21 |



Table S8: Relative energies for the lowest lying structures including the triplet spin states.

| Structure          | Energy (a.u.) | $\Delta E$ (kcal/mol) |
|--------------------|---------------|-----------------------|
| Fe2C4B4-01         | -3169.978639  | 0.00                  |
| Fe2C4B4-02-triplet | -3169.961170  | 10.96                 |
| Fe2C4B4-02         | -3169.952081  | 16.67                 |
| Fe2C4B4-01-triplet | -3169.946966  | 19.88                 |
| Fe2C4B4-03         | -3169.942022  | 22.98                 |
| Fe2C4B4-04-triplet | -3169.937362  | 25.90                 |
| Fe2C4B4-04         | -3169.935259  | 27.22                 |
| Fe2C4B4-05         | -3169.933268  | 28.47                 |
| Fe2C4B4-06-triplet | -3169.932379  | 29.03                 |
| Fe2C4B4-06         | -3169.930984  | 29.90                 |
| Fe2C4B4-07         | -3169.927507  | 32.09                 |
| Fe2C4B4-05-triplet | -3169.926857  | 32.49                 |
| Fe2C4B4-07-triplet | -3169.925030  | 33.64                 |
| Fe2C4B4-08         | -3169.918228  | 37.91                 |
| Fe2C4B4-03-triplet | -3169.911265  | 42.28                 |
| Fe2C4B4-08-triplet | -3169.902824  | 47.58                 |
| Fe2C4B5-01-triplet | -3195.384330  | 0.00                  |
| Fe2C4B5-01         | -3195.384326  | 0.00                  |
| Fe2C4B5-02         | -3195.384111  | 0.14                  |
| Fe2C4B5-03         | -3195.382696  | 1.03                  |
| Fe2C4B5-04         | -3195.382312  | 1.27                  |
| Fe2C4B5-05         | -3195.380448  | 2.44                  |
| Fe2C4B5-06         | -3195.379480  | 3.04                  |
| Fe2C4B5-05-triplet | -3195.378783  | 3.48                  |
| Fe2C4B5-07         | -3195.376217  | 5.09                  |
| Fe2C4B5-03-triplet | -3195.374193  | 6.36                  |
| Fe2C4B5-08         | -3195.374069  | 6.44                  |
| Fe2C4B5-10-triplet | -3195.373636  | 6.71                  |
| Fe2C4B5-06-triplet | -3195.373475  | 6.81                  |
| Fe2C4B5-09         | -3195.372515  | 7.41                  |
| Fe2C4B5-10         | -3195.371937  | 7.78                  |
| Fe2C4B5-20-triplet | -3195.370196  | 8.87                  |
| Fe2C4B5-11         | -3195.370135  | 8.91                  |
| Fe2C4B5-13-triplet | -3195.369817  | 9.11                  |
| Fe2C4B5-12         | -3195.369454  | 9.33                  |
| Fe2C4B5-13         | -3195.369279  | 9.44                  |
| Fe2C4B5-08-triplet | -3195.368699  | 9.81                  |
| Fe2C4B5-14         | -3195.368342  | 10.03                 |
| Fe2C4B5-09-triplet | -3195.368087  | 10.19                 |
| Fe2C4B5-15-triplet | -3195.367869  | 10.33                 |
| Fe2C4B5-15         | -3195.366101  | 11.44                 |
| Fe2C4B5-16         | -3195.363668  | 12.97                 |
| Fe2C4B5-07-triplet | -3195.363112  | 13.31                 |
| Fe2C4B5-17         | -3195.363035  | 13.36                 |

|                    |              |       |
|--------------------|--------------|-------|
| Fe2C4B5-18         | -3195.361698 | 14.20 |
| Fe2C4B5-23-triplet | -3195.361688 | 14.21 |
| Fe2C4B5-19         | -3195.361682 | 14.21 |
| Fe2C4B5-20         | -3195.360897 | 14.70 |
| Fe2C4B5-21         | -3195.360785 | 14.77 |
| Fe2C4B5-22         | -3195.360621 | 14.88 |
| Fe2C4B5-23         | -3195.360192 | 15.15 |
| Fe2C4B5-24         | -3195.359590 | 15.52 |
| Fe2C4B5-04-triplet | -3195.359318 | 15.70 |
| Fe2C4B5-18-triplet | -3195.358141 | 16.43 |
| Fe2C4B5-25         | -3195.357420 | 16.89 |
| Fe2C4B5-17-triplet | -3195.357188 | 17.03 |
| Fe2C4B5-26         | -3195.356975 | 17.17 |
| Fe2C4B5-25-triplet | -3195.356838 | 17.25 |
| Fe2C4B5-14-triplet | -3195.356544 | 17.44 |
| Fe2C4B5-02-triplet | -3195.353354 | 19.44 |
| Fe2C4B5-26-triplet | -3195.351440 | 20.64 |
| Fe2C4B5-24-triplet | -3195.350929 | 20.96 |
| Fe2C4B5-21-triplet | -3195.349064 | 22.13 |
| Fe2C4B5-19-triplet | -3195.348909 | 22.23 |
| Fe2C4B5-22-triplet | -3195.348290 | 22.62 |
| Fe2C4B5-12-triplet | -3195.338099 | 29.01 |
| Fe2C4B5-11-triplet | -3195.336988 | 29.71 |
| Fe2C4B5-16-triplet | -3195.319820 | 40.48 |
| Fe2C4B6-05-triplet | -3220.822552 | 0.00  |
| Fe2C4B6-01         | -3220.819716 | 1.78  |
| Fe2C4B6-02         | -3220.817202 | 3.36  |
| Fe2C4B6-03         | -3220.817071 | 3.44  |
| Fe2C4B6-04         | -3220.814352 | 5.15  |
| Fe2C4B6-05         | -3220.813035 | 5.97  |
| Fe2C4B6-06         | -3220.809723 | 8.05  |
| Fe2C4B6-07         | -3220.808823 | 8.62  |
| Fe2C4B6-09-triplet | -3220.808383 | 8.89  |
| Fe2C4B6-08         | -3220.807589 | 9.39  |
| Fe2C4B6-09         | -3220.806824 | 9.87  |
| Fe2C4B6-01-triplet | -3220.806685 | 9.96  |
| Fe2C4B6-12-triplet | -3220.806599 | 10.01 |
| Fe2C4B6-03-triplet | -3220.803895 | 11.71 |
| Fe2C4B6-10         | -3220.802959 | 12.29 |
| Fe2C4B6-11         | -3220.800062 | 14.11 |
| Fe2C4B6-12         | -3220.798002 | 15.41 |
| Fe2C4B6-13         | -3220.796352 | 16.44 |
| Fe2C4B6-11-triplet | -3220.793736 | 18.08 |
| Fe2C4B6-14         | -3220.793623 | 18.15 |
| Fe2C4B6-15         | -3220.790784 | 19.94 |
| Fe2C4B6-15-triplet | -3220.789763 | 20.58 |
| Fe2C4B6-08-triplet | -3220.789381 | 20.82 |

|                    |              |       |
|--------------------|--------------|-------|
| Fe2C4B6-10-triplet | -3220.785953 | 22.97 |
| Fe2C4B6-14-triplet | -3220.779006 | 27.33 |
| Fe2C4B6-06-triplet | -3220.776487 | 28.91 |
| Fe2C4B6-07-triplet | -3220.772229 | 31.58 |
| Fe2C4B6-13-triplet | -3220.772021 | 31.71 |
| Fe2C4B6-02-triplet | -3220.763512 | 37.05 |
| Fe2C4B6-04-triplet | -3220.759174 | 39.77 |
| Fe2C4B7-01         | -3246.272117 | 0.00  |
| Fe2C4B7-01-triplet | -3246.266481 | 3.54  |
| Fe2C4B7-02         | -3246.265045 | 4.44  |
| Fe2C4B7-03         | -3246.264523 | 4.77  |
| Fe2C4B7-04         | -3246.261902 | 6.41  |
| Fe2C4B7-03-triplet | -3246.261623 | 6.59  |
| Fe2C4B7-05         | -3246.261449 | 6.69  |
| Fe2C4B7-06         | -3246.255282 | 10.56 |
| Fe2C4B7-07         | -3246.252626 | 12.23 |
| Fe2C4B7-08         | -3246.249938 | 13.92 |
| Fe2C4B7-09         | -3246.249808 | 14.00 |
| Fe2C4B7-10         | -3246.249710 | 14.06 |
| Fe2C4B7-11         | -3246.248024 | 15.12 |
| Fe2C4B7-12         | -3246.247380 | 15.52 |
| Fe2C4B7-06-triplet | -3246.247045 | 15.73 |
| Fe2C4B7-13         | -3246.247037 | 15.74 |
| Fe2C4B7-14         | -3246.246615 | 16.00 |
| Fe2C4B7-15         | -3246.246167 | 16.28 |
| Fe2C4B7-13-triplet | -3246.245880 | 16.46 |
| Fe2C4B7-16         | -3246.245764 | 16.54 |
| Fe2C4B7-17         | -3246.244903 | 17.08 |
| Fe2C4B7-18         | -3246.244098 | 17.58 |
| Fe2C4B7-19         | -3246.243353 | 18.05 |
| Fe2C4B7-20         | -3246.242961 | 18.30 |
| Fe2C4B7-11-triplet | -3246.242665 | 18.48 |
| Fe2C4B7-20-triplet | -3246.241205 | 19.40 |
| Fe2C4B7-17-triplet | -3246.239003 | 20.78 |
| Fe2C4B7-09-triplet | -3246.238686 | 20.98 |
| Fe2C4B7-08-triplet | -3246.237849 | 21.50 |
| Fe2C4B7-12-triplet | -3246.237525 | 21.71 |
| Fe2C4B7-18-triplet | -3246.235297 | 23.11 |
| Fe2C4B7-19-triplet | -3246.234976 | 23.31 |
| Fe2C4B7-02-triplet | -3246.230627 | 26.04 |
| Fe2C4B7-15-triplet | -3246.226557 | 28.59 |
| Fe2C4B7-05-triplet | -3246.223875 | 30.27 |
| Fe2C4B7-04-triplet | -3246.221101 | 32.01 |
| Fe2C4B7-07-triplet | -3246.214231 | 36.32 |
| Fe2C4B7-10-triplet | -3246.211516 | 38.03 |
| Fe2C4B7-16-triplet | -3246.209850 | 39.07 |
| Fe2C4B7-14-triplet | -3246.209656 | 39.20 |

---

|                    |              |       |
|--------------------|--------------|-------|
| Fe2C4B8-01         | -3271.697698 | 0.00  |
| Fe2C4B8-02         | -3271.696742 | 0.60  |
| Fe2C4B8-03         | -3271.696270 | 0.90  |
| Fe2C4B8-04         | -3271.694558 | 1.97  |
| Fe2C4B8-03-triplet | -3271.686066 | 7.30  |
| Fe2C4B8-01-triplet | -3271.679799 | 11.23 |
| Fe2C4B8-05         | -3271.677969 | 12.38 |
| Fe2C4B8-02-triplet | -3271.676605 | 13.24 |
| Fe2C4B8-06         | -3271.674110 | 14.80 |
| Fe2C4B8-07         | -3271.673943 | 14.91 |
| Fe2C4B8-08         | -3271.672564 | 15.77 |
| Fe2C4B8-09         | -3271.672094 | 16.07 |
| Fe2C4B8-10         | -3271.671709 | 16.31 |
| Fe2C4B8-11         | -3271.669444 | 17.73 |
| Fe2C4B8-12         | -3271.666054 | 19.86 |
| Fe2C4B8-05-triplet | -3271.664649 | 20.74 |
| Fe2C4B8-08-triplet | -3271.659915 | 23.71 |
| Fe2C4B8-10-triplet | -3271.658312 | 24.72 |
| Fe2C4B8-06-triplet | -3271.657838 | 25.01 |
| Fe2C4B8-12-triplet | -3271.656626 | 25.77 |
| Fe2C4B8-07-triplet | -3271.654339 | 27.21 |
| Fe2C4B8-04-triplet | -3271.651918 | 28.73 |
| Fe2C4B8-09-triplet | -3271.649622 | 30.17 |
| Fe2C4B8-11-triplet | -3271.641568 | 35.22 |

---
